# Supplementary material for: Temporal transcriptional response of Candida glabrata during macrophage infection reveals a multifaceted transcriptional regulator CgXbp1 important for macrophage response and fluconazole resistance
Source: eLife journal article supplement (doi:10.7554/elife.73832), 2024-10-02
Supplement: supp [file elife-73832-supp-v1.zip]

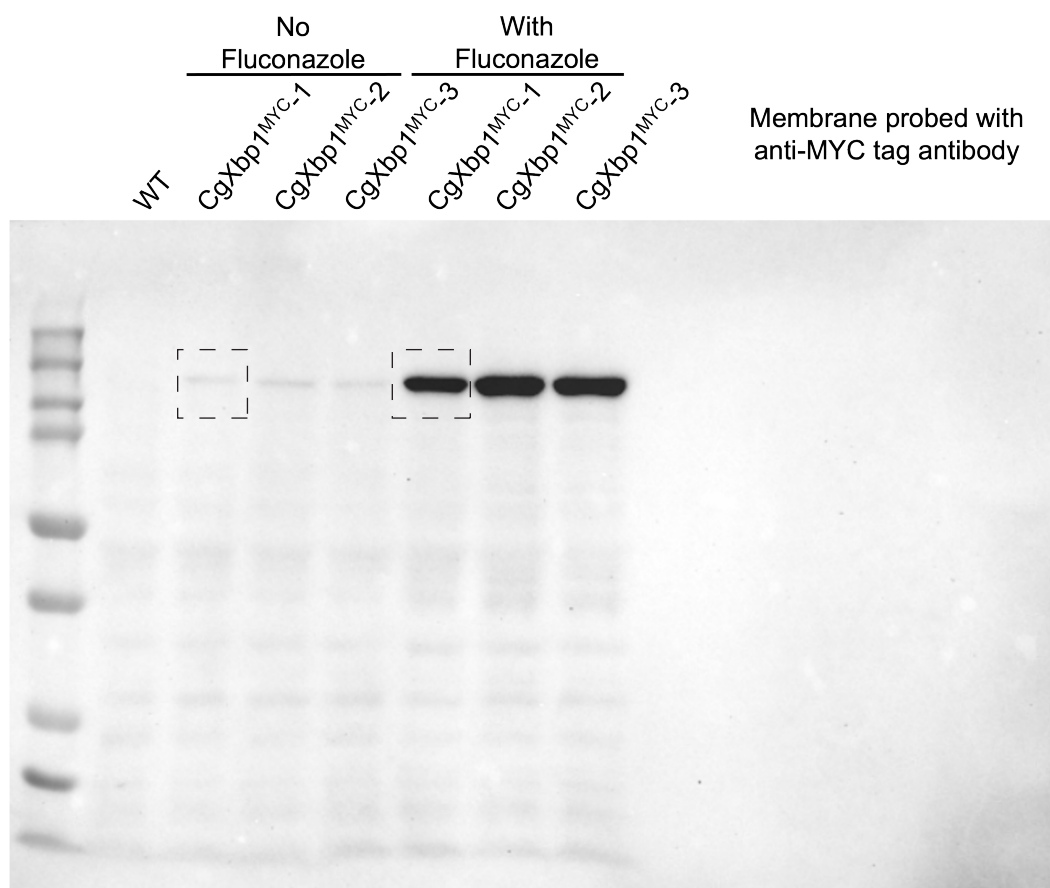

CgXbp1<sup>MYC</sup> western, dotted box indicates lanes/samples used in Figure 6E.

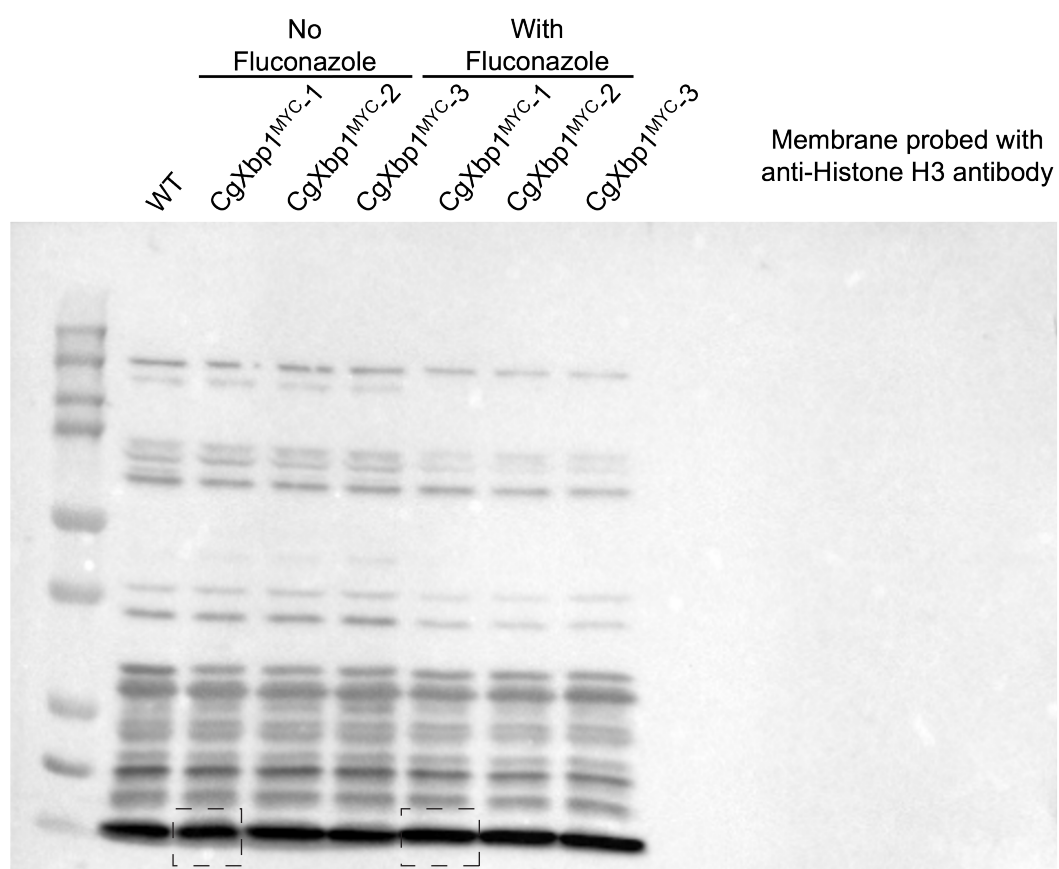

Histone H3 control, dotted box indicates lanes/samples used in Figure 6E.
