# Supplementary material for: Temporal transcriptional response of Candida glabrata during macrophage infection reveals a multifaceted transcriptional regulator CgXbp1 important for macrophage response and fluconazole resistance
Source: eLife journal article supplement (doi:10.7554/elife.73832), 2024-10-02
Supplement: supp [file elife-73832-supp-v1.zip]

## Figure 3-figure supplement 1

**A**

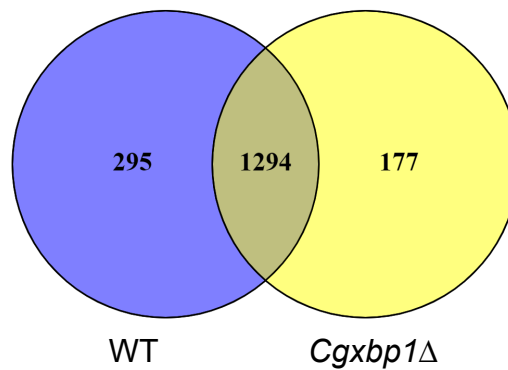

**B**

| GO-term                                             | WT   |    |    | <i>Cgxbp1</i> Δ |    |    |
|-----------------------------------------------------|------|----|----|-----------------|----|----|
|                                                     | 0.5h | 2h | 4h | 0.5h            | 2h | 4h |
| small molecule metabolic process                    |      | Y  | Y  | Y               | Y  |    |
| generation of precursor metabolites and energy      |      | Y  | Y  | Y               |    |    |
| ATP metabolic process                               |      | Y  | Y  | Y               |    |    |
| energy derivation by oxidation of organic compounds |      | Y  | Y  | Y               |    |    |
| aerobic respiration                                 |      | Y  | Y  | Y               |    |    |
| ribonucleotide biosynthetic process                 |      | Y  |    | Y               | Y  |    |
| purine-containing compound biosynthetic process     |      | Y  |    | Y               | Y  |    |
| ribose phosphate biosynthetic process               |      | Y  |    | Y               | Y  |    |
| purine nucleotide biosynthetic process              |      | Y  |    | Y               | Y  |    |
| oxidation-reduction process                         |      | Y  | Y  | Y               |    |    |
| ATP synthesis coupled electron transport            |      | Y  |    | Y               |    |    |
| lysine biosynthetic process                         |      | Y  |    | Y               |    |    |
| cellular amino acid biosynthetic process            |      | Y  |    | Y               |    |    |
| ion transmembrane transport                         |      | Y  |    | Y               |    |    |
| small molecule biosynthetic process                 |      | Y  |    | Y               |    |    |
| alpha-amino acid biosynthetic process               |      | Y  |    | Y               |    |    |
| carboxylic acid biosynthetic process                |      | Y  |    | Y               |    |    |
| histidine biosynthetic process                      |      | Y  |    | Y               |    |    |
| transmembrane transport                             |      | Y  |    | Y               |    |    |
| aspartate family amino acid biosynthetic process    |      | Y  |    | Y               |    |    |
| tricarboxylic acid cycle                            |      | Y  |    | Y               |    |    |
| acetate catabolic process                           |      | Y  | Y  | Y               |    |    |
| nucleoside triphosphate biosynthetic process        |      | Y  | Y  | Y               |    |    |
| carbon utilization                                  |      | Y  | Y  | Y               |    |    |
| ribonucleoside triphosphate biosynthetic process    |      | Y  | Y  | Y               |    |    |
| trehalose biosynthetic process                      |      |    | Y  | Y               |    |    |
| response to oxidative stress                        |      |    | Y  | Y               |    |    |
| response to water                                   |      |    | Y  | Y               |    |    |
| carbohydrate biosynthetic process                   |      |    | Y  | Y               |    |    |
| drug metabolic process                              |      | Y  | Y  |                 |    |    |
| 'de novo' IMP biosynthetic process                  |      | Y  |    | Y               | Y  |    |
| nucleoside phosphate biosynthetic process           |      | Y  |    | Y               | Y  |    |
| ribonucleoside monophosphate biosynthetic process   |      | Y  |    | Y               | Y  |    |
| fumarate metabolic process                          |      | Y  |    | Y               | Y  |    |
| nucleotide biosynthetic process                     |      | Y  |    | Y               | Y  |    |
| nucleosome assembly                                 |      | Y  | Y  | Y               | Y  |    |
| monocarboxylic acid metabolic process               |      | Y  | Y  |                 |    |    |
