# Supplementary material for: Temporal transcriptional response of Candida glabrata during macrophage infection reveals a multifaceted transcriptional regulator CgXbp1 important for macrophage response and fluconazole resistance
Source: eLife. 2024 Oct 2;13:e73832. doi: 10.7554/eLife.73832 (PMC11554308; doi:10.7554/eLife.73832)
Supplement: Supplementary file 1. [file elife-73832-supp1.xlsx]

## Sheet: Expressed gene list
	Supplementary File 1: List of actively transcribing genes in wildtype C. glabrata upon macrophage infection
	Genes_0.5h	Genes_2h	Genes_4h	Genes_6h	Genes_8h		Combined gene list (FPKM≥12)		Low exp genes identified by SD method (SD≥2.25)		Low exp SD genes manually confirmed on IGV		Final gene list FPKM≥12 + SD≥2.25	Temporally induced/ Constitutively expressed
	CAGL0A00110g	CAGL0A00363g	CAGL0A00363g	CAGL0A00363g	CAGL0A00363g		CAGL0A00110g		CAGL0K12518g		CAGL0K12518g		CAGL0A00110g	Temporally induced
	CAGL0A00116g	CAGL0A00495g	CAGL0A00407g	CAGL0A00495g	CAGL0A00495g		CAGL0A00116g		CAGL0M06963g		CAGL0M06963g		CAGL0A00116g	Temporally induced
	CAGL0A00495g	CAGL0A00517g	CAGL0A00495g	CAGL0A00517g	CAGL0A00979g		CAGL0A00363g		CAGL0M00198g		CAGL0M00198g		CAGL0A00363g	Temporally induced
	CAGL0A00979g	CAGL0A00979g	CAGL0A00517g	CAGL0A00979g	CAGL0A01023g		CAGL0A00407g		CAGL0E01567g		CAGL0E01567g		CAGL0A00407g	Temporally induced
	CAGL0A01001g	CAGL0A01001g	CAGL0A00979g	CAGL0A01045g	CAGL0A01045g		CAGL0A00495g		CAGL0D02046g		CAGL0D02046g		CAGL0A00495g	Temporally induced
	CAGL0A01023g	CAGL0A01023g	CAGL0A01023g	CAGL0A01089g	CAGL0A01111g		CAGL0A00517g		CAGL0L02167g		CAGL0L02167g		CAGL0A00517g	Temporally induced
	CAGL0A01045g	CAGL0A01045g	CAGL0A01045g	CAGL0A01111g	CAGL0A01193g		CAGL0A00979g		CAGL0L09339g		CAGL0L09339g		CAGL0A00979g	Temporally induced
	CAGL0A01111g	CAGL0A01111g	CAGL0A01089g	CAGL0A01193g	CAGL0A01199g		CAGL0A01001g		CAGL0M09911g		CAGL0M09911g		CAGL0A01001g	Temporally induced
	CAGL0A01193g	CAGL0A01193g	CAGL0A01111g	CAGL0A01199g	CAGL0A01243g		CAGL0A01023g		CAGL0D06380g		CAGL0D06380g		CAGL0A01023g	Temporally induced
	CAGL0A01199g	CAGL0A01199g	CAGL0A01193g	CAGL0A01243g	CAGL0A01430g		CAGL0A01045g		CAGL0H03971g		CAGL0H03971g		CAGL0A01045g	Temporally induced
	CAGL0A01474g	CAGL0A01243g	CAGL0A01199g	CAGL0A01430g	CAGL0A01540g		CAGL0A01089g		CAGL0I06831g		CAGL0I06831g		CAGL0A01089g	Temporally induced
	CAGL0A01540g	CAGL0A01325g	CAGL0A01540g	CAGL0A01540g	CAGL0A01562g		CAGL0A01111g		CAGL0I00264g		CAGL0I00264g		CAGL0A01111g	Temporally induced
	CAGL0A01562g	CAGL0A01430g	CAGL0A01562g	CAGL0A01562g	CAGL0A01628g		CAGL0A01193g		CAGL0E06644g		CAGL0E06644g		CAGL0A01193g	Temporally induced
	CAGL0A01650g	CAGL0A01474g	CAGL0A01628g	CAGL0A01628g	CAGL0A01650g		CAGL0A01199g		CAGL0I09086g		CAGL0I09086g		CAGL0A01199g	Temporally induced
	CAGL0A01716g	CAGL0A01540g	CAGL0A01650g	CAGL0A01650g	CAGL0A01716g		CAGL0A01243g		CAGL0J08547g		CAGL0J08547g		CAGL0A01243g	Temporally induced
	CAGL0A01826g	CAGL0A01562g	CAGL0A01716g	CAGL0A01716g	CAGL0A01782g		CAGL0A01325g		CAGL0K08954g		CAGL0K08954g		CAGL0A01325g	Temporally induced
	CAGL0A02321g	CAGL0A01628g	CAGL0A01782g	CAGL0A01782g	CAGL0A01826g		CAGL0A01430g		CAGL0L11088g		CAGL0L11088g		CAGL0A01430g	Temporally induced
	CAGL0A02365g	CAGL0A01650g	CAGL0A01826g	CAGL0A01826g	CAGL0A02002g		CAGL0A01474g		CAGL0I08833g		CAGL0I08833g		CAGL0A01474g	Temporally induced
	CAGL0A02409g	CAGL0A01716g	CAGL0A02002g	CAGL0A02002g	CAGL0A02211g		CAGL0A01540g		CAGL0I05720g		CAGL0I05720g		CAGL0A01540g	Temporally induced
	CAGL0A02431g	CAGL0A01782g	CAGL0A02211g	CAGL0A02211g	CAGL0A02233g		CAGL0A01562g		CAGL0D02134g		CAGL0D02134g		CAGL0A01562g	Temporally induced
	CAGL0A02475g	CAGL0A01826g	CAGL0A02233g	CAGL0A02233g	CAGL0A02321g		CAGL0A01628g		CAGL0F07491g		CAGL0F07491g		CAGL0A01628g	Temporally induced
	CAGL0A02574g	CAGL0A02002g	CAGL0A02321g	CAGL0A02321g	CAGL0A02365g		CAGL0A01650g		CAGL0B02970g		CAGL0B02970g		CAGL0A01650g	Temporally induced
	CAGL0A02618g	CAGL0A02112g	CAGL0A02365g	CAGL0A02365g	CAGL0A02409g		CAGL0A01716g		CAGL0K04543g		CAGL0K04543g		CAGL0A01716g	Temporally induced
	CAGL0A02673g	CAGL0A02211g	CAGL0A02409g	CAGL0A02409g	CAGL0A02431g		CAGL0A01782g		CAGL0I09394g		CAGL0I09394g		CAGL0A01782g	Temporally induced
	CAGL0A02695g	CAGL0A02233g	CAGL0A02431g	CAGL0A02431g	CAGL0A02475g		CAGL0A01826g		CAGL0J00385g		CAGL0J00385g		CAGL0A01826g	Temporally induced
	CAGL0A02706g	CAGL0A02321g	CAGL0A02475g	CAGL0A02475g	CAGL0A02552g		CAGL0A02002g		CAGL0F08503g		CAGL0F08503g		CAGL0A02002g	Temporally induced
	CAGL0A02728g	CAGL0A02365g	CAGL0A02486g	CAGL0A02552g	CAGL0A02574g		CAGL0A02112g		CAGL0G08646g		CAGL0G08646g		CAGL0A02112g	Temporally induced
	CAGL0A02750g	CAGL0A02409g	CAGL0A02552g	CAGL0A02574g	CAGL0A02618g		CAGL0A02211g		CAGL0K04103g		CAGL0K04103g		CAGL0A02211g	Temporally induced
	CAGL0A03051g	CAGL0A02431g	CAGL0A02574g	CAGL0A02618g	CAGL0A02706g		CAGL0A02233g		CAGL0K00825g		CAGL0K00825g		CAGL0A02233g	Temporally induced
	CAGL0A03102g	CAGL0A02475g	CAGL0A02618g	CAGL0A02706g	CAGL0A02728g		CAGL0A02321g		CAGL0K05203g		CAGL0K05203g		CAGL0A02321g	Temporally induced
	CAGL0A03117g	CAGL0A02486g	CAGL0A02728g	CAGL0A02728g	CAGL0A02750g		CAGL0A02365g		CAGL0G06754g		CAGL0G06754g		CAGL0A02365g	Temporally induced
	CAGL0A03146g	CAGL0A02552g	CAGL0A02750g	CAGL0A02750g	CAGL0A03036g		CAGL0A02409g		CAGL0H09460g		CAGL0H09460g		CAGL0A02409g	Temporally induced
	CAGL0A03168g	CAGL0A02574g	CAGL0A03036g	CAGL0A03036g	CAGL0A03102g		CAGL0A02431g		CAGL0G03179g		CAGL0G03179g		CAGL0A02431g	Temporally induced
	CAGL0A03190g	CAGL0A02618g	CAGL0A03080g	CAGL0A03102g	CAGL0A03117g		CAGL0A02475g		CAGL0K01903g		CAGL0K01903g		CAGL0A02475g	Temporally induced
	CAGL0A03212g	CAGL0A02673g	CAGL0A03102g	CAGL0A03117g	CAGL0A03146g		CAGL0A02486g		CAGL0H05423g		CAGL0H05423g		CAGL0A02486g	Temporally induced
	CAGL0A03234g	CAGL0A02706g	CAGL0A03117g	CAGL0A03146g	CAGL0A03168g		CAGL0A02552g		CAGL0I09658g		CAGL0I09658g		CAGL0A02552g	Temporally induced
	CAGL0A03278g	CAGL0A02728g	CAGL0A03146g	CAGL0A03168g	CAGL0A03212g		CAGL0A02574g		CAGL0B01529g		CAGL0B01529g		CAGL0A02574g	Temporally induced
	CAGL0A03366g	CAGL0A02750g	CAGL0A03168g	CAGL0A03212g	CAGL0A03234g		CAGL0A02618g		CAGL0M10065g		CAGL0M10065g		CAGL0A02618g	Temporally induced
	CAGL0A03388g	CAGL0A03036g	CAGL0A03212g	CAGL0A03234g	CAGL0A03278g		CAGL0A02673g		CAGL0G02409g		CAGL0G02409g		CAGL0A02673g	Temporally induced
	CAGL0A03718g	CAGL0A03102g	CAGL0A03234g	CAGL0A03278g	CAGL0A03366g		CAGL0A02695g		CAGL0M01716g		CAGL0M01716g		CAGL0A02695g	Temporally induced
	CAGL0A03740g	CAGL0A03117g	CAGL0A03278g	CAGL0A03366g	CAGL0A03388g		CAGL0A02706g		CAGL0H02717g		CAGL0H02717g		CAGL0A02706g	Temporally induced
	CAGL0A03872g	CAGL0A03146g	CAGL0A03366g	CAGL0A03388g	CAGL0A03476g		CAGL0A02728g		CAGL0L11902g		CAGL0L11902g		CAGL0A02728g	Temporally induced
	CAGL0A03883g	CAGL0A03168g	CAGL0A03388g	CAGL0A03476g	CAGL0A03718g		CAGL0A02750g		CAGL0L10164g		CAGL0L10164g		CAGL0A02750g	Temporally induced
	CAGL0A03905g	CAGL0A03212g	CAGL0A03476g	CAGL0A03718g	CAGL0A03872g		CAGL0A03036g		CAGL0J09790g		CAGL0J09790g		CAGL0A03036g	Temporally induced
	CAGL0A03927g	CAGL0A03234g	CAGL0A03542g	CAGL0A03872g	CAGL0A03883g		CAGL0A03051g		CAGL0M00374g		CAGL0M00374g		CAGL0A03051g	Temporally induced
	CAGL0A04015g	CAGL0A03278g	CAGL0A03718g	CAGL0A03883g	CAGL0A03905g		CAGL0A03080g		CAGL0F08987g		CAGL0F08987g		CAGL0A03080g	Temporally induced
	CAGL0A04037g	CAGL0A03366g	CAGL0A03872g	CAGL0A03905g	CAGL0A03927g		CAGL0A03102g		CAGL0K08426g		CAGL0K08426g		CAGL0A03102g	Temporally induced
	CAGL0A04059g	CAGL0A03388g	CAGL0A03883g	CAGL0A03927g	CAGL0A04015g		CAGL0A03117g		CAGL0K07315g		CAGL0K07315g		CAGL0A03117g	Temporally induced
	CAGL0A04081g	CAGL0A03476g	CAGL0A03905g	CAGL0A04015g	CAGL0A04037g		CAGL0A03146g		CAGL0D01716g		CAGL0D01716g		CAGL0A03146g	Temporally induced
	CAGL0A04103g	CAGL0A03542g	CAGL0A03927g	CAGL0A04037g	CAGL0A04059g		CAGL0A03168g		CAGL0A00429g		CAGL0A00429g		CAGL0A03168g	Temporally induced
	CAGL0A04125g	CAGL0A03718g	CAGL0A04015g	CAGL0A04059g	CAGL0A04081g		CAGL0A03190g		CAGL0I09724g		CAGL0I09724g		CAGL0A03190g	Temporally induced
	CAGL0A04191g	CAGL0A03872g	CAGL0A04037g	CAGL0A04081g	CAGL0A04103g		CAGL0A03212g		CAGL0D02728g		CAGL0D02728g		CAGL0A03212g	Temporally induced
	CAGL0A04213g	CAGL0A03883g	CAGL0A04059g	CAGL0A04103g	CAGL0A04125g		CAGL0A03234g		CAGL0F04477g		CAGL0F04477g		CAGL0A03234g	Temporally induced
	CAGL0A04257g	CAGL0A03905g	CAGL0A04081g	CAGL0A04125g	CAGL0A04191g		CAGL0A03278g		CAGL0I00308g		CAGL0I00308g		CAGL0A03278g	Temporally induced
	CAGL0A04279g	CAGL0A03927g	CAGL0A04103g	CAGL0A04191g	CAGL0A04213g		CAGL0A03366g		CAGL0E03762g		CAGL0E03762g		CAGL0A03366g	Temporally induced
	CAGL0A04499g	CAGL0A04015g	CAGL0A04125g	CAGL0A04213g	CAGL0A04279g		CAGL0A03388g		CAGL0J05082g		CAGL0J05082g		CAGL0A03388g	Temporally induced
	CAGL0A04521g	CAGL0A04037g	CAGL0A04191g	CAGL0A04279g	CAGL0A04521g		CAGL0A03476g		CAGL0K07678g		CAGL0K07678g		CAGL0A03476g	Temporally induced
	CAGL0B00105g	CAGL0A04059g	CAGL0A04213g	CAGL0A04499g	CAGL0A04829g		CAGL0A03542g		CAGL0K04895g		CAGL0K04895g		CAGL0A03542g	Temporally induced
	CAGL0B00110g	CAGL0A04081g	CAGL0A04279g	CAGL0A04521g	CAGL0B00440g		CAGL0A03718g		CAGL0E05258g		CAGL0E05258g		CAGL0A03718g	Temporally induced
	CAGL0B00440g	CAGL0A04103g	CAGL0A04433g	CAGL0A04829g	CAGL0B00594g		CAGL0A03740g		CAGL0M08558g		CAGL0M08558g		CAGL0A03740g	Temporally induced
	CAGL0B00594g	CAGL0A04125g	CAGL0A04499g	CAGL0B00440g	CAGL0B00704g		CAGL0A03872g		CAGL0L05626g		CAGL0L05626g		CAGL0A03872g	Temporally induced
	CAGL0B00704g	CAGL0A04169g	CAGL0A04521g	CAGL0B00594g	CAGL0B00814g		CAGL0A03883g		CAGL0H07667g		CAGL0H07667g		CAGL0A03883g	Temporally induced
	CAGL0B00792g	CAGL0A04191g	CAGL0A04675g	CAGL0B00704g	CAGL0B00836g		CAGL0A03905g		CAGL0I06457g		CAGL0I06457g		CAGL0A03905g	Temporally induced
	CAGL0B01100g	CAGL0A04213g	CAGL0A04719g	CAGL0B00792g	CAGL0B00902g		CAGL0A03927g		CAGL0K04785g		CAGL0K04785g		CAGL0A03927g	Temporally induced
	CAGL0B01122g	CAGL0A04257g	CAGL0A04829g	CAGL0B00814g	CAGL0B00946g		CAGL0A04015g		CAGL0K09592g		CAGL0K09592g		CAGL0A04015g	Temporally induced
	CAGL0B01203g	CAGL0A04279g	CAGL0B00440g	CAGL0B00836g	CAGL0B00990g		CAGL0A04037g		CAGL0G03927g		CAGL0G03927g		CAGL0A04037g	Temporally induced
	CAGL0B01232g	CAGL0A04433g	CAGL0B00594g	CAGL0B00946g	CAGL0B01100g		CAGL0A04059g		CAGL0J08272g		CAGL0J08272g		CAGL0A04059g	Temporally induced
	CAGL0B01441g	CAGL0A04499g	CAGL0B00704g	CAGL0B00990g	CAGL0B01122g		CAGL0A04081g		CAGL0B02255g		CAGL0B02255g		CAGL0A04081g	Temporally induced
	CAGL0B01903g	CAGL0A04521g	CAGL0B00814g	CAGL0B01100g	CAGL0B01203g		CAGL0A04103g		CAGL0M09735g				CAGL0A04103g	Temporally induced
	CAGL0B02431g	CAGL0A04829g	CAGL0B00836g	CAGL0B01122g	CAGL0B01232g		CAGL0A04125g		CAGL0H03465g				CAGL0A04125g	Temporally induced
	CAGL0B02453g	CAGL0B00396g	CAGL0B00946g	CAGL0B01203g	CAGL0B01375g		CAGL0A04169g		CAGL0A00105g				CAGL0A04169g	Temporally induced
	CAGL0B02475g	CAGL0B00440g	CAGL0B00990g	CAGL0B01232g	CAGL0B01397g		CAGL0A04191g		CAGL0M11836g				CAGL0A04191g	Temporally induced
	CAGL0B02497g	CAGL0B00594g	CAGL0B01100g	CAGL0B01375g	CAGL0B01419g		CAGL0A04213g		CAGL0B00220g				CAGL0A04213g	Temporally induced
	CAGL0B02563g	CAGL0B00704g	CAGL0B01122g	CAGL0B01397g	CAGL0B01441g		CAGL0A04257g		CAGL0M00418g				CAGL0A04257g	Temporally induced
	CAGL0B02585g	CAGL0B00792g	CAGL0B01203g	CAGL0B01419g	CAGL0B01463g		CAGL0A04279g		CAGL0E00116g				CAGL0A04279g	Temporally induced
	CAGL0B02607g	CAGL0B00814g	CAGL0B01232g	CAGL0B01441g	CAGL0B02035g		CAGL0A04433g		CAGL0E06688g				CAGL0A04433g	Temporally induced
	CAGL0B02717g	CAGL0B00836g	CAGL0B01419g	CAGL0B01463g	CAGL0B02431g		CAGL0A04499g		CAGL0B03223g				CAGL0A04499g	Temporally induced
	CAGL0B02860g	CAGL0B00902g	CAGL0B01441g	CAGL0B02035g	CAGL0B02453g		CAGL0A04521g		CAGL0F06677g				CAGL0A04521g	Temporally induced
	CAGL0B02981g	CAGL0B00924g	CAGL0B01463g	CAGL0B02431g	CAGL0B02475g		CAGL0A04675g		CAGL0D00105g				CAGL0A04675g	Temporally induced
	CAGL0B03047g	CAGL0B00990g	CAGL0B01903g	CAGL0B02453g	CAGL0B02497g		CAGL0A04719g		CAGL0I00374g				CAGL0A04719g	Temporally induced
	CAGL0B03069g	CAGL0B01100g	CAGL0B02035g	CAGL0B02475g	CAGL0B02563g		CAGL0A04829g		CAGL0A00715g				CAGL0A04829g	Temporally induced
	CAGL0B03465g	CAGL0B01122g	CAGL0B02431g	CAGL0B02563g	CAGL0B02585g		CAGL0B00105g		CAGL0F05225g				CAGL0B00105g	Temporally induced
	CAGL0B03487g	CAGL0B01203g	CAGL0B02453g	CAGL0B02585g	CAGL0B02607g		CAGL0B00110g		CAGL0C04933g				CAGL0B00110g	Temporally induced
	CAGL0B03509g	CAGL0B01232g	CAGL0B02475g	CAGL0B02607g	CAGL0B02717g		CAGL0B00396g		CAGL0E00341g				CAGL0B00396g	Temporally induced
	CAGL0B03597g	CAGL0B01375g	CAGL0B02497g	CAGL0B02717g	CAGL0B02860g		CAGL0B00440g		CAGL0J02970g				CAGL0B00440g	Temporally induced
	CAGL0B03608g	CAGL0B01397g	CAGL0B02563g	CAGL0B02860g	CAGL0B02981g		CAGL0B00594g		CAGL0H02959g				CAGL0B00594g	Temporally induced
	CAGL0B03619g	CAGL0B01441g	CAGL0B02585g	CAGL0B02981g	CAGL0B03047g		CAGL0B00704g		CAGL0G03113g				CAGL0B00704g	Temporally induced
	CAGL0B03663g	CAGL0B01463g	CAGL0B02607g	CAGL0B03047g	CAGL0B03069g		CAGL0B00792g		CAGL0H08217g				CAGL0B00792g	Temporally induced
	CAGL0B03685g	CAGL0B01903g	CAGL0B02717g	CAGL0B03069g	CAGL0B03421g		CAGL0B00814g						CAGL0B00814g	Temporally induced
	CAGL0B03795g	CAGL0B02431g	CAGL0B02860g	CAGL0B03421g	CAGL0B03487g		CAGL0B00836g						CAGL0B00836g	Temporally induced
	CAGL0B04257g	CAGL0B02453g	CAGL0B02981g	CAGL0B03487g	CAGL0B03509g		CAGL0B00902g						CAGL0B00902g	Temporally induced
	CAGL0B04279g	CAGL0B02475g	CAGL0B03047g	CAGL0B03509g	CAGL0B03597g		CAGL0B00924g						CAGL0B00924g	Temporally induced
	CAGL0B04521g	CAGL0B02497g	CAGL0B03069g	CAGL0B03597g	CAGL0B03608g		CAGL0B00946g						CAGL0B00946g	Temporally induced
	CAGL0B04543g	CAGL0B02563g	CAGL0B03465g	CAGL0B03608g	CAGL0B03619g		CAGL0B00990g						CAGL0B00990g	Temporally induced
	CAGL0B05093g	CAGL0B02585g	CAGL0B03487g	CAGL0B03619g	CAGL0B03663g		CAGL0B01100g						CAGL0B01100g	Temporally induced
	CAGL0B05137g	CAGL0B02607g	CAGL0B03509g	CAGL0B03663g	CAGL0B03685g		CAGL0B01122g						CAGL0B01122g	Temporally induced
	CAGL0B05148g	CAGL0B02717g	CAGL0B03597g	CAGL0B03685g	CAGL0B03773g		CAGL0B01203g						CAGL0B01203g	Temporally induced
	CAGL0C00363g	CAGL0B02794g	CAGL0B03608g	CAGL0B03773g	CAGL0B03795g		CAGL0B01232g						CAGL0B01232g	Temporally induced
	CAGL0C00539g	CAGL0B02838g	CAGL0B03619g	CAGL0B03795g	CAGL0B03817g		CAGL0B01375g						CAGL0B01375g	Temporally induced
	CAGL0C00671g	CAGL0B02860g	CAGL0B03663g	CAGL0B03817g	CAGL0B03927g		CAGL0B01397g						CAGL0B01397g	Temporally induced
	CAGL0C00693g	CAGL0B02981g	CAGL0B03685g	CAGL0B03927g	CAGL0B04257g		CAGL0B01419g						CAGL0B01419g	Temporally induced
	CAGL0C00847g	CAGL0B03014g	CAGL0B03773g	CAGL0B04257g	CAGL0B04345g		CAGL0B01441g						CAGL0B01441g	Temporally induced
	CAGL0C00968g	CAGL0B03047g	CAGL0B03795g	CAGL0B04345g	CAGL0B04521g		CAGL0B01463g						CAGL0B01463g	Temporally induced
	CAGL0C01056g	CAGL0B03069g	CAGL0B03817g	CAGL0B04521g	CAGL0B04543g		CAGL0B01903g						CAGL0B01903g	Temporally induced
	CAGL0C01067g	CAGL0B03465g	CAGL0B03839g	CAGL0B04543g	CAGL0B04565g		CAGL0B02035g						CAGL0B02035g	Temporally induced
	CAGL0C01133g	CAGL0B03487g	CAGL0B03927g	CAGL0B04565g	CAGL0B04587g		CAGL0B02431g						CAGL0B02431g	Temporally induced
	CAGL0C01325g	CAGL0B03509g	CAGL0B04257g	CAGL0B04587g	CAGL0B04675g		CAGL0B02453g						CAGL0B02453g	Temporally induced
	CAGL0C01485g	CAGL0B03597g	CAGL0B04521g	CAGL0B04675g	CAGL0B04807g		CAGL0B02475g						CAGL0B02475g	Temporally induced
	CAGL0C01507g	CAGL0B03608g	CAGL0B04543g	CAGL0B04807g	CAGL0B04917g		CAGL0B02497g						CAGL0B02497g	Temporally induced
	CAGL0C01529g	CAGL0B03619g	CAGL0B04565g	CAGL0B04917g	CAGL0B05093g		CAGL0B02563g						CAGL0B02563g	Temporally induced
	CAGL0C01551g	CAGL0B03663g	CAGL0B04587g	CAGL0B05093g	CAGL0B05137g		CAGL0B02585g						CAGL0B02585g	Temporally induced
	CAGL0C01573g	CAGL0B03685g	CAGL0B04675g	CAGL0B05137g	CAGL0C00275g		CAGL0B02607g						CAGL0B02607g	Temporally induced
	CAGL0C01793g	CAGL0B03773g	CAGL0B04807g	CAGL0C00275g	CAGL0C00363g		CAGL0B02717g						CAGL0B02717g	Temporally induced
	CAGL0C01815g	CAGL0B03795g	CAGL0B04917g	CAGL0C00363g	CAGL0C00539g		CAGL0B02794g						CAGL0B02794g	Temporally induced
	CAGL0C02013g	CAGL0B03817g	CAGL0B04939g	CAGL0C00539g	CAGL0C00671g		CAGL0B02838g						CAGL0B02838g	Temporally induced
	CAGL0C02167g	CAGL0B03839g	CAGL0B04983g	CAGL0C00649g	CAGL0C00693g		CAGL0B02860g						CAGL0B02860g	Temporally induced
	CAGL0C02189g	CAGL0B03927g	CAGL0B05137g	CAGL0C00671g	CAGL0C01056g		CAGL0B02981g						CAGL0B02981g	Temporally induced
	CAGL0C02211g	CAGL0B04257g	CAGL0C00275g	CAGL0C00693g	CAGL0C01067g		CAGL0B03014g						CAGL0B03014g	Temporally induced
	CAGL0C02321g	CAGL0B04345g	CAGL0C00341g	CAGL0C01056g	CAGL0C01133g		CAGL0B03047g						CAGL0B03047g	Temporally induced
	CAGL0C02365g	CAGL0B04521g	CAGL0C00363g	CAGL0C01067g	CAGL0C01325g		CAGL0B03069g						CAGL0B03069g	Temporally induced
	CAGL0C02453g	CAGL0B04543g	CAGL0C00495g	CAGL0C01133g	CAGL0C01485g		CAGL0B03421g						CAGL0B03421g	Temporally induced
	CAGL0C02541g	CAGL0B04565g	CAGL0C00539g	CAGL0C01325g	CAGL0C01507g		CAGL0B03465g						CAGL0B03465g	Temporally induced
	CAGL0C02739g	CAGL0B04587g	CAGL0C00649g	CAGL0C01507g	CAGL0C01529g		CAGL0B03487g						CAGL0B03487g	Temporally induced
	CAGL0C03003g	CAGL0B04675g	CAGL0C00671g	CAGL0C01551g	CAGL0C01551g		CAGL0B03509g						CAGL0B03509g	Temporally induced
	CAGL0C03069g	CAGL0B04697g	CAGL0C00693g	CAGL0C01573g	CAGL0C01573g		CAGL0B03597g						CAGL0B03597g	Temporally induced
	CAGL0C03113g	CAGL0B04807g	CAGL0C01056g	CAGL0C01705g	CAGL0C01705g		CAGL0B03608g						CAGL0B03608g	Temporally induced
	CAGL0C03333g	CAGL0B04917g	CAGL0C01067g	CAGL0C01793g	CAGL0C01793g		CAGL0B03619g						CAGL0B03619g	Temporally induced
	CAGL0C03443g	CAGL0B05137g	CAGL0C01133g	CAGL0C01815g	CAGL0C01815g		CAGL0B03663g						CAGL0B03663g	Temporally induced
	CAGL0C03531g	CAGL0C00341g	CAGL0C01325g	CAGL0C02013g	CAGL0C02013g		CAGL0B03685g						CAGL0B03685g	Temporally induced
	CAGL0C03553g	CAGL0C00363g	CAGL0C01485g	CAGL0C02167g	CAGL0C02167g		CAGL0B03773g						CAGL0B03773g	Temporally induced
	CAGL0C03597g	CAGL0C00495g	CAGL0C01507g	CAGL0C02189g	CAGL0C02189g		CAGL0B03795g						CAGL0B03795g	Temporally induced
	CAGL0C03608g	CAGL0C00539g	CAGL0C01529g	CAGL0C02343g	CAGL0C02321g		CAGL0B03817g						CAGL0B03817g	Temporally induced
	CAGL0C03872g	CAGL0C00671g	CAGL0C01551g	CAGL0C02365g	CAGL0C02343g		CAGL0B03839g						CAGL0B03839g	Temporally induced
	CAGL0C04114g	CAGL0C00693g	CAGL0C01573g	CAGL0C02453g	CAGL0C02365g		CAGL0B03927g						CAGL0B03927g	Temporally induced
	CAGL0C04136g	CAGL0C00968g	CAGL0C01705g	CAGL0C02519g	CAGL0C02453g		CAGL0B04257g						CAGL0B04257g	Temporally induced
	CAGL0C04389g	CAGL0C01056g	CAGL0C01793g	CAGL0C02541g	CAGL0C02519g		CAGL0B04279g						CAGL0B04279g	Temporally induced
	CAGL0C04411g	CAGL0C01067g	CAGL0C01815g	CAGL0C02623g	CAGL0C02541g		CAGL0B04345g						CAGL0B04345g	Temporally induced
	CAGL0C04433g	CAGL0C01133g	CAGL0C02013g	CAGL0C02739g	CAGL0C02739g		CAGL0B04521g						CAGL0B04521g	Temporally induced
	CAGL0C04455g	CAGL0C01243g	CAGL0C02167g	CAGL0C02981g	CAGL0C02959g		CAGL0B04543g						CAGL0B04543g	Temporally induced
	CAGL0C04477g	CAGL0C01325g	CAGL0C02189g	CAGL0C03069g	CAGL0C03069g		CAGL0B04565g						CAGL0B04565g	Temporally induced
	CAGL0C04499g	CAGL0C01485g	CAGL0C02211g	CAGL0C03113g	CAGL0C03113g		CAGL0B04587g						CAGL0B04587g	Temporally induced
	CAGL0C04543g	CAGL0C01507g	CAGL0C02321g	CAGL0C03223g	CAGL0C03223g		CAGL0B04675g						CAGL0B04675g	Temporally induced
	CAGL0C04609g	CAGL0C01529g	CAGL0C02343g	CAGL0C03245g	CAGL0C03245g		CAGL0B04697g						CAGL0B04697g	Temporally induced
	CAGL0C04719g	CAGL0C01551g	CAGL0C02365g	CAGL0C03333g	CAGL0C03333g		CAGL0B04807g						CAGL0B04807g	Temporally induced
	CAGL0C04741g	CAGL0C01573g	CAGL0C02453g	CAGL0C03369g	CAGL0C03369g		CAGL0B04917g						CAGL0B04917g	Temporally induced
	CAGL0C05137g	CAGL0C01793g	CAGL0C02519g	CAGL0C03531g	CAGL0C03443g		CAGL0B04939g						CAGL0B04939g	Temporally induced
	CAGL0C05379g	CAGL0C01815g	CAGL0C02541g	CAGL0C03553g	CAGL0C03531g		CAGL0B04983g						CAGL0B04983g	Temporally induced
	CAGL0D00154g	CAGL0C02013g	CAGL0C02623g	CAGL0C03597g	CAGL0C03553g		CAGL0B05093g						CAGL0B05093g	Temporally induced
	CAGL0D00176g	CAGL0C02167g	CAGL0C02739g	CAGL0C03608g	CAGL0C03597g		CAGL0B05137g						CAGL0B05137g	Temporally induced
	CAGL0D00418g	CAGL0C02189g	CAGL0C02959g	CAGL0C03740g	CAGL0C03608g		CAGL0B05148g						CAGL0B05148g	Temporally induced
	CAGL0D00440g	CAGL0C02211g	CAGL0C02981g	CAGL0C03762g	CAGL0C03740g		CAGL0C00275g						CAGL0C00275g	Temporally induced
	CAGL0D00484g	CAGL0C02321g	CAGL0C03069g	CAGL0C03872g	CAGL0C03762g		CAGL0C00341g						CAGL0C00341g	Temporally induced
	CAGL0D00528g	CAGL0C02343g	CAGL0C03113g	CAGL0C04114g	CAGL0C03872g		CAGL0C00363g						CAGL0C00363g	Temporally induced
	CAGL0D00594g	CAGL0C02365g	CAGL0C03223g	CAGL0C04136g	CAGL0C04114g		CAGL0C00495g						CAGL0C00495g	Temporally induced
	CAGL0D00616g	CAGL0C02453g	CAGL0C03245g	CAGL0C04301g	CAGL0C04136g		CAGL0C00539g						CAGL0C00539g	Temporally induced
	CAGL0D00704g	CAGL0C02519g	CAGL0C03333g	CAGL0C04389g	CAGL0C04301g		CAGL0C00649g						CAGL0C00649g	Temporally induced
	CAGL0D00858g	CAGL0C02541g	CAGL0C03369g	CAGL0C04411g	CAGL0C04389g		CAGL0C00671g						CAGL0C00671g	Temporally induced
	CAGL0D01034g	CAGL0C02623g	CAGL0C03443g	CAGL0C04455g	CAGL0C04411g		CAGL0C00693g						CAGL0C00693g	Temporally induced
	CAGL0D01188g	CAGL0C02739g	CAGL0C03531g	CAGL0C04477g	CAGL0C04455g		CAGL0C00847g						CAGL0C00847g	Temporally induced
	CAGL0D01254g	CAGL0C02827g	CAGL0C03553g	CAGL0C04543g	CAGL0C04477g		CAGL0C00968g						CAGL0C00968g	Temporally induced
	CAGL0D01276g	CAGL0C02959g	CAGL0C03597g	CAGL0C04587g	CAGL0C04499g		CAGL0C01056g						CAGL0C01056g	Temporally induced
	CAGL0D01298g	CAGL0C03069g	CAGL0C03608g	CAGL0C04719g	CAGL0C04543g		CAGL0C01067g						CAGL0C01067g	Temporally induced
	CAGL0D01760g	CAGL0C03113g	CAGL0C03740g	CAGL0C04741g	CAGL0C04587g		CAGL0C01133g						CAGL0C01133g	Temporally induced
	CAGL0D01936g	CAGL0C03223g	CAGL0C03762g	CAGL0C04785g	CAGL0C04609g		CAGL0C01243g						CAGL0C01243g	Temporally induced
	CAGL0D01958g	CAGL0C03245g	CAGL0C03872g	CAGL0C05027g	CAGL0C04697g		CAGL0C01325g						CAGL0C01325g	Temporally induced
	CAGL0D02024g	CAGL0C03267g	CAGL0C04114g	CAGL0C05137g	CAGL0C04719g		CAGL0C01485g						CAGL0C01485g	Temporally induced
	CAGL0D02090g	CAGL0C03333g	CAGL0C04136g	CAGL0C05335g	CAGL0C04741g		CAGL0C01507g						CAGL0C01507g	Temporally induced
	CAGL0D02530g	CAGL0C03369g	CAGL0C04367g	CAGL0C05379g	CAGL0C04785g		CAGL0C01529g						CAGL0C01529g	Temporally induced
	CAGL0D02618g	CAGL0C03443g	CAGL0C04389g	CAGL0D00176g	CAGL0C05027g		CAGL0C01551g						CAGL0C01551g	Temporally induced
	CAGL0D02772g	CAGL0C03531g	CAGL0C04411g	CAGL0D00286g	CAGL0C05137g		CAGL0C01573g						CAGL0C01573g	Temporally induced
	CAGL0D02794g	CAGL0C03553g	CAGL0C04455g	CAGL0D00418g	CAGL0C05335g		CAGL0C01705g						CAGL0C01705g	Temporally induced
	CAGL0D02948g	CAGL0C03597g	CAGL0C04477g	CAGL0D00440g	CAGL0C05379g		CAGL0C01793g						CAGL0C01793g	Temporally induced
	CAGL0D03058g	CAGL0C03608g	CAGL0C04499g	CAGL0D00484g	CAGL0D00176g		CAGL0C01815g						CAGL0C01815g	Temporally induced
	CAGL0D03322g	CAGL0C03740g	CAGL0C04543g	CAGL0D00528g	CAGL0D00286g		CAGL0C02013g						CAGL0C02013g	Temporally induced
	CAGL0D03454g	CAGL0C03872g	CAGL0C04587g	CAGL0D00594g	CAGL0D00418g		CAGL0C02167g						CAGL0C02167g	Temporally induced
	CAGL0D03498g	CAGL0C04114g	CAGL0C04609g	CAGL0D00616g	CAGL0D00440g		CAGL0C02189g						CAGL0C02189g	Temporally induced
	CAGL0D03674g	CAGL0C04136g	CAGL0C04697g	CAGL0D00704g	CAGL0D00484g		CAGL0C02211g						CAGL0C02211g	Temporally induced
	CAGL0D03718g	CAGL0C04301g	CAGL0C04719g	CAGL0D00858g	CAGL0D00528g		CAGL0C02321g						CAGL0C02321g	Temporally induced
	CAGL0D03894g	CAGL0C04367g	CAGL0C04741g	CAGL0D01034g	CAGL0D00594g		CAGL0C02343g						CAGL0C02343g	Temporally induced
	CAGL0D04114g	CAGL0C04389g	CAGL0C04785g	CAGL0D01188g	CAGL0D00616g		CAGL0C02365g						CAGL0C02365g	Temporally induced
	CAGL0D04290g	CAGL0C04411g	CAGL0C05027g	CAGL0D01265g	CAGL0D00704g		CAGL0C02453g						CAGL0C02453g	Temporally induced
	CAGL0D04356g	CAGL0C04433g	CAGL0C05137g	CAGL0D01276g	CAGL0D00858g		CAGL0C02519g						CAGL0C02519g	Temporally induced
	CAGL0D04708g	CAGL0C04455g	CAGL0C05335g	CAGL0D01298g	CAGL0D01034g		CAGL0C02541g						CAGL0C02541g	Temporally induced
	CAGL0D04840g	CAGL0C04477g	CAGL0C05379g	CAGL0D01364g	CAGL0D01188g		CAGL0C02623g						CAGL0C02623g	Temporally induced
	CAGL0D05082g	CAGL0C04499g	CAGL0D00176g	CAGL0D01936g	CAGL0D01265g		CAGL0C02739g						CAGL0C02739g	Temporally induced
	CAGL0D05148g	CAGL0C04543g	CAGL0D00286g	CAGL0D01958g	CAGL0D01276g		CAGL0C02827g						CAGL0C02827g	Temporally induced
	CAGL0D05192g	CAGL0C04697g	CAGL0D00418g	CAGL0D01980g	CAGL0D01298g		CAGL0C02959g						CAGL0C02959g	Temporally induced
	CAGL0D05214g	CAGL0C04719g	CAGL0D00440g	CAGL0D02090g	CAGL0D01364g		CAGL0C02981g						CAGL0C02981g	Temporally induced
	CAGL0D05302g	CAGL0C04741g	CAGL0D00484g	CAGL0D02530g	CAGL0D01936g		CAGL0C03003g						CAGL0C03003g	Temporally induced
	CAGL0D05434g	CAGL0C04873g	CAGL0D00528g	CAGL0D02794g	CAGL0D01958g		CAGL0C03069g						CAGL0C03069g	Temporally induced
	CAGL0D05478g	CAGL0C05027g	CAGL0D00594g	CAGL0D02926g	CAGL0D01980g		CAGL0C03113g						CAGL0C03113g	Temporally induced
	CAGL0D05544g	CAGL0C05115g	CAGL0D00616g	CAGL0D02948g	CAGL0D02024g		CAGL0C03223g						CAGL0C03223g	Temporally induced
	CAGL0D05632g	CAGL0C05137g	CAGL0D00682g	CAGL0D03146g	CAGL0D02090g		CAGL0C03245g						CAGL0C03245g	Temporally induced
	CAGL0D05918g	CAGL0C05335g	CAGL0D00704g	CAGL0D03322g	CAGL0D02530g		CAGL0C03267g						CAGL0C03267g	Temporally induced
	CAGL0D05940g	CAGL0C05379g	CAGL0D00748g	CAGL0D03432g	CAGL0D02794g		CAGL0C03333g						CAGL0C03333g	Temporally induced
	CAGL0D06160g	CAGL0D00176g	CAGL0D00858g	CAGL0D03454g	CAGL0D02926g		CAGL0C03369g						CAGL0C03369g	Temporally induced
	CAGL0D06270g	CAGL0D00286g	CAGL0D01034g	CAGL0D03498g	CAGL0D02948g		CAGL0C03443g						CAGL0C03443g	Temporally induced
	CAGL0D06292g	CAGL0D00418g	CAGL0D01188g	CAGL0D03586g	CAGL0D03058g		CAGL0C03531g						CAGL0C03531g	Temporally induced
	CAGL0D06402g	CAGL0D00440g	CAGL0D01276g	CAGL0D03674g	CAGL0D03146g		CAGL0C03553g						CAGL0C03553g	Temporally induced
	CAGL0D06424g	CAGL0D00484g	CAGL0D01298g	CAGL0D03718g	CAGL0D03322g		CAGL0C03597g						CAGL0C03597g	Temporally induced
	CAGL0D06556g	CAGL0D00528g	CAGL0D01364g	CAGL0D03894g	CAGL0D03432g		CAGL0C03608g						CAGL0C03608g	Temporally induced
	CAGL0D06578g	CAGL0D00594g	CAGL0D01760g	CAGL0D04114g	CAGL0D03454g		CAGL0C03740g						CAGL0C03740g	Temporally induced
	CAGL0D06600g	CAGL0D00616g	CAGL0D01892g	CAGL0D04136g	CAGL0D03498g		CAGL0C03762g						CAGL0C03762g	Temporally induced
	CAGL0D06688g	CAGL0D00704g	CAGL0D01936g	CAGL0D04290g	CAGL0D03586g		CAGL0C03872g						CAGL0C03872g	Temporally induced
	CAGL0D06732g	CAGL0D00748g	CAGL0D01958g	CAGL0D04356g	CAGL0D03674g		CAGL0C04114g						CAGL0C04114g	Temporally induced
	CAGL0E00231g	CAGL0D00858g	CAGL0D01980g	CAGL0D04708g	CAGL0D03718g		CAGL0C04136g						CAGL0C04136g	Temporally induced
	CAGL0E00363g	CAGL0D01034g	CAGL0D02024g	CAGL0D04834g	CAGL0D03894g		CAGL0C04301g						CAGL0C04301g	Temporally induced
	CAGL0E00561g	CAGL0D01188g	CAGL0D02090g	CAGL0D05082g	CAGL0D03982g		CAGL0C04367g						CAGL0C04367g	Temporally induced
	CAGL0E00605g	CAGL0D01276g	CAGL0D02530g	CAGL0D05148g	CAGL0D04114g		CAGL0C04389g						CAGL0C04389g	Temporally induced
	CAGL0E00671g	CAGL0D01298g	CAGL0D02794g	CAGL0D05192g	CAGL0D04136g		CAGL0C04411g						CAGL0C04411g	Temporally induced
	CAGL0E00715g	CAGL0D01364g	CAGL0D02926g	CAGL0D05214g	CAGL0D04290g		CAGL0C04433g						CAGL0C04433g	Temporally induced
	CAGL0E00737g	CAGL0D01562g	CAGL0D02948g	CAGL0D05302g	CAGL0D04356g		CAGL0C04455g						CAGL0C04455g	Temporally induced
	CAGL0E00759g	CAGL0D01760g	CAGL0D03058g	CAGL0D05434g	CAGL0D04708g		CAGL0C04477g						CAGL0C04477g	Temporally induced
	CAGL0E00781g	CAGL0D01892g	CAGL0D03146g	CAGL0D05544g	CAGL0D04834g		CAGL0C04499g						CAGL0C04499g	Temporally induced
	CAGL0E00803g	CAGL0D01936g	CAGL0D03322g	CAGL0D05566g	CAGL0D05082g		CAGL0C04543g						CAGL0C04543g	Temporally induced
	CAGL0E00869g	CAGL0D01958g	CAGL0D03432g	CAGL0D05632g	CAGL0D05192g		CAGL0C04587g						CAGL0C04587g	Temporally induced
	CAGL0E00891g	CAGL0D01980g	CAGL0D03454g	CAGL0D05918g	CAGL0D05214g		CAGL0C04609g						CAGL0C04609g	Temporally induced
	CAGL0E00935g	CAGL0D02024g	CAGL0D03498g	CAGL0D05940g	CAGL0D05302g		CAGL0C04697g						CAGL0C04697g	Temporally induced
	CAGL0E01023g	CAGL0D02090g	CAGL0D03520g	CAGL0D06270g	CAGL0D05434g		CAGL0C04719g						CAGL0C04719g	Temporally induced
	CAGL0E01133g	CAGL0D02530g	CAGL0D03586g	CAGL0D06402g	CAGL0D05544g		CAGL0C04741g						CAGL0C04741g	Temporally induced
	CAGL0E01155g	CAGL0D02640g	CAGL0D03674g	CAGL0D06424g	CAGL0D05566g		CAGL0C04785g						CAGL0C04785g	Temporally induced
	CAGL0E01177g	CAGL0D02662g	CAGL0D03718g	CAGL0D06578g	CAGL0D05632g		CAGL0C04873g						CAGL0C04873g	Temporally induced
	CAGL0E01199g	CAGL0D02772g	CAGL0D03894g	CAGL0D06600g	CAGL0D05918g		CAGL0C05027g						CAGL0C05027g	Temporally induced
	CAGL0E01221g	CAGL0D02794g	CAGL0D03982g	CAGL0D06688g	CAGL0D05940g		CAGL0C05115g						CAGL0C05115g	Temporally induced
	CAGL0E01243g	CAGL0D02926g	CAGL0D04004g	CAGL0E00231g	CAGL0D06270g		CAGL0C05137g						CAGL0C05137g	Temporally induced
	CAGL0E01287g	CAGL0D02948g	CAGL0D04114g	CAGL0E00363g	CAGL0D06292g		CAGL0C05335g						CAGL0C05335g	Temporally induced
	CAGL0E01331g	CAGL0D03058g	CAGL0D04136g	CAGL0E00605g	CAGL0D06402g		CAGL0C05379g						CAGL0C05379g	Temporally induced
	CAGL0E01353g	CAGL0D03146g	CAGL0D04290g	CAGL0E00649g	CAGL0D06424g		CAGL0D00154g						CAGL0D00154g	Temporally induced
	CAGL0E01463g	CAGL0D03322g	CAGL0D04356g	CAGL0E00671g	CAGL0D06556g		CAGL0D00176g						CAGL0D00176g	Temporally induced
	CAGL0E01661g	CAGL0D03432g	CAGL0D04708g	CAGL0E00715g	CAGL0D06578g		CAGL0D00286g						CAGL0D00286g	Temporally induced
	CAGL0E01683g	CAGL0D03454g	CAGL0D04834g	CAGL0E00737g	CAGL0D06600g		CAGL0D00418g						CAGL0D00418g	Temporally induced
	CAGL0E01705g	CAGL0D03498g	CAGL0D04840g	CAGL0E00759g	CAGL0D06688g		CAGL0D00440g						CAGL0D00440g	Temporally induced
	CAGL0E01727g	CAGL0D03586g	CAGL0D05082g	CAGL0E00781g	CAGL0E00231g		CAGL0D00484g						CAGL0D00484g	Temporally induced
	CAGL0E01837g	CAGL0D03674g	CAGL0D05148g	CAGL0E00803g	CAGL0E00363g		CAGL0D00528g						CAGL0D00528g	Temporally induced
	CAGL0E01969g	CAGL0D03718g	CAGL0D05192g	CAGL0E00869g	CAGL0E00605g		CAGL0D00594g						CAGL0D00594g	Temporally induced
	CAGL0E01991g	CAGL0D03894g	CAGL0D05214g	CAGL0E00891g	CAGL0E00649g		CAGL0D00616g						CAGL0D00616g	Temporally induced
	CAGL0E02013g	CAGL0D04004g	CAGL0D05302g	CAGL0E00935g	CAGL0E00671g		CAGL0D00682g						CAGL0D00682g	Temporally induced
	CAGL0E02233g	CAGL0D04092g	CAGL0D05434g	CAGL0E01133g	CAGL0E00715g		CAGL0D00704g						CAGL0D00704g	Temporally induced
	CAGL0E02255g	CAGL0D04114g	CAGL0D05478g	CAGL0E01155g	CAGL0E00737g		CAGL0D00748g						CAGL0D00748g	Temporally induced
	CAGL0E02739g	CAGL0D04136g	CAGL0D05544g	CAGL0E01177g	CAGL0E00759g		CAGL0D00858g						CAGL0D00858g	Temporally induced
	CAGL0E02761g	CAGL0D04290g	CAGL0D05566g	CAGL0E01199g	CAGL0E00781g		CAGL0D01034g						CAGL0D01034g	Temporally induced
	CAGL0E02915g	CAGL0D04356g	CAGL0D05632g	CAGL0E01221g	CAGL0E00803g		CAGL0D01188g						CAGL0D01188g	Temporally induced
	CAGL0E03113g	CAGL0D04708g	CAGL0D05918g	CAGL0E01243g	CAGL0E00869g		CAGL0D01254g						CAGL0D01254g	Temporally induced
	CAGL0E03157g	CAGL0D04834g	CAGL0D05940g	CAGL0E01331g	CAGL0E00891g		CAGL0D01265g						CAGL0D01265g	Temporally induced
	CAGL0E03245g	CAGL0D04840g	CAGL0D06270g	CAGL0E01353g	CAGL0E00935g		CAGL0D01276g						CAGL0D01276g	Temporally induced
	CAGL0E03520g	CAGL0D05082g	CAGL0D06292g	CAGL0E01463g	CAGL0E01133g		CAGL0D01298g						CAGL0D01298g	Temporally induced
	CAGL0E03564g	CAGL0D05148g	CAGL0D06402g	CAGL0E01705g	CAGL0E01155g		CAGL0D01364g						CAGL0D01364g	Temporally induced
	CAGL0E03652g	CAGL0D05192g	CAGL0D06424g	CAGL0E01727g	CAGL0E01177g		CAGL0D01562g						CAGL0D01562g	Temporally induced
	CAGL0E03938g	CAGL0D05214g	CAGL0D06556g	CAGL0E01793g	CAGL0E01199g		CAGL0D01760g						CAGL0D01760g	Temporally induced
	CAGL0E03960g	CAGL0D05280g	CAGL0D06578g	CAGL0E01837g	CAGL0E01221g		CAGL0D01892g						CAGL0D01892g	Temporally induced
	CAGL0E04092g	CAGL0D05302g	CAGL0D06600g	CAGL0E01881g	CAGL0E01243g		CAGL0D01936g						CAGL0D01936g	Temporally induced
	CAGL0E04268g	CAGL0D05434g	CAGL0D06688g	CAGL0E01969g	CAGL0E01353g		CAGL0D01958g						CAGL0D01958g	Temporally induced
	CAGL0E04312g	CAGL0D05478g	CAGL0E00231g	CAGL0E01991g	CAGL0E01463g		CAGL0D01980g						CAGL0D01980g	Temporally induced
	CAGL0E04334g	CAGL0D05544g	CAGL0E00363g	CAGL0E02013g	CAGL0E01705g		CAGL0D02024g						CAGL0D02024g	Temporally induced
	CAGL0E04356g	CAGL0D05632g	CAGL0E00605g	CAGL0E02233g	CAGL0E01727g		CAGL0D02090g						CAGL0D02090g	Temporally induced
	CAGL0E04598g	CAGL0D05918g	CAGL0E00649g	CAGL0E02255g	CAGL0E01793g		CAGL0D02530g						CAGL0D02530g	Temporally induced
	CAGL0E04620g	CAGL0D05940g	CAGL0E00671g	CAGL0E02315g	CAGL0E01837g		CAGL0D02618g						CAGL0D02618g	Temporally induced
	CAGL0E04752g	CAGL0D06160g	CAGL0E00715g	CAGL0E02321g	CAGL0E01881g		CAGL0D02640g						CAGL0D02640g	Temporally induced
	CAGL0E04906g	CAGL0D06270g	CAGL0E00737g	CAGL0E02739g	CAGL0E01969g		CAGL0D02662g						CAGL0D02662g	Temporally induced
	CAGL0E04994g	CAGL0D06292g	CAGL0E00759g	CAGL0E02761g	CAGL0E01991g		CAGL0D02772g						CAGL0D02772g	Temporally induced
	CAGL0E05346g	CAGL0D06402g	CAGL0E00803g	CAGL0E03003g	CAGL0E02013g		CAGL0D02794g						CAGL0D02794g	Temporally induced
	CAGL0E05632g	CAGL0D06424g	CAGL0E00869g	CAGL0E03025g	CAGL0E02233g		CAGL0D02926g						CAGL0D02926g	Temporally induced
	CAGL0E05984g	CAGL0D06556g	CAGL0E00891g	CAGL0E03113g	CAGL0E02255g		CAGL0D02948g						CAGL0D02948g	Temporally induced
	CAGL0E06072g	CAGL0D06578g	CAGL0E00935g	CAGL0E03157g	CAGL0E02315g		CAGL0D03058g						CAGL0D03058g	Temporally induced
	CAGL0E06138g	CAGL0D06600g	CAGL0E01023g	CAGL0E03245g	CAGL0E02321g		CAGL0D03146g						CAGL0D03146g	Temporally induced
	CAGL0E06160g	CAGL0D06688g	CAGL0E01133g	CAGL0E03267g	CAGL0E02739g		CAGL0D03322g						CAGL0D03322g	Temporally induced
	CAGL0E06358g	CAGL0E00231g	CAGL0E01155g	CAGL0E03289g	CAGL0E02761g		CAGL0D03432g						CAGL0D03432g	Temporally induced
	CAGL0E06666g	CAGL0E00363g	CAGL0E01177g	CAGL0E03366g	CAGL0E03003g		CAGL0D03454g						CAGL0D03454g	Temporally induced
	CAGL0F00105g	CAGL0E00605g	CAGL0E01199g	CAGL0E03498g	CAGL0E03025g		CAGL0D03498g						CAGL0D03498g	Temporally induced
	CAGL0F00110g	CAGL0E00671g	CAGL0E01221g	CAGL0E03520g	CAGL0E03113g		CAGL0D03520g						CAGL0D03520g	Temporally induced
	CAGL0F00561g	CAGL0E00715g	CAGL0E01243g	CAGL0E03652g	CAGL0E03157g		CAGL0D03586g						CAGL0D03586g	Temporally induced
	CAGL0F00605g	CAGL0E00737g	CAGL0E01287g	CAGL0E03938g	CAGL0E03245g		CAGL0D03674g						CAGL0D03674g	Temporally induced
	CAGL0F01045g	CAGL0E00759g	CAGL0E01331g	CAGL0E03960g	CAGL0E03267g		CAGL0D03718g						CAGL0D03718g	Temporally induced
	CAGL0F01089g	CAGL0E00781g	CAGL0E01353g	CAGL0E04092g	CAGL0E03289g		CAGL0D03894g						CAGL0D03894g	Temporally induced
	CAGL0F01199g	CAGL0E00803g	CAGL0E01463g	CAGL0E04312g	CAGL0E03366g		CAGL0D03982g						CAGL0D03982g	Temporally induced
	CAGL0F01221g	CAGL0E00869g	CAGL0E01683g	CAGL0E04334g	CAGL0E03498g		CAGL0D04004g						CAGL0D04004g	Temporally induced
	CAGL0F01265g	CAGL0E00891g	CAGL0E01705g	CAGL0E04356g	CAGL0E03520g		CAGL0D04092g						CAGL0D04092g	Temporally induced
	CAGL0F01287g	CAGL0E00935g	CAGL0E01727g	CAGL0E04554g	CAGL0E03652g		CAGL0D04114g						CAGL0D04114g	Temporally induced
	CAGL0F01463g	CAGL0E01133g	CAGL0E01793g	CAGL0E04598g	CAGL0E03938g		CAGL0D04136g						CAGL0D04136g	Temporally induced
	CAGL0F01507g	CAGL0E01155g	CAGL0E01837g	CAGL0E04620g	CAGL0E03960g		CAGL0D04290g						CAGL0D04290g	Temporally induced
	CAGL0F01683g	CAGL0E01177g	CAGL0E01881g	CAGL0E04752g	CAGL0E04092g		CAGL0D04356g						CAGL0D04356g	Temporally induced
	CAGL0F01793g	CAGL0E01199g	CAGL0E01969g	CAGL0E04906g	CAGL0E04312g		CAGL0D04708g						CAGL0D04708g	Temporally induced
	CAGL0F01815g	CAGL0E01221g	CAGL0E01991g	CAGL0E04994g	CAGL0E04334g		CAGL0D04834g						CAGL0D04834g	Temporally induced
	CAGL0F01837g	CAGL0E01243g	CAGL0E02013g	CAGL0E05346g	CAGL0E04356g		CAGL0D04840g						CAGL0D04840g	Temporally induced
	CAGL0F01969g	CAGL0E01287g	CAGL0E02233g	CAGL0E05390g	CAGL0E04548g		CAGL0D05082g						CAGL0D05082g	Temporally induced
	CAGL0F02563g	CAGL0E01331g	CAGL0E02255g	CAGL0E05456g	CAGL0E04554g		CAGL0D05148g						CAGL0D05148g	Temporally induced
	CAGL0F02695g	CAGL0E01353g	CAGL0E02315g	CAGL0E05478g	CAGL0E04598g		CAGL0D05192g						CAGL0D05192g	Temporally induced
	CAGL0F02717g	CAGL0E01463g	CAGL0E02321g	CAGL0E05500g	CAGL0E04620g		CAGL0D05214g						CAGL0D05214g	Temporally induced
	CAGL0F02937g	CAGL0E01683g	CAGL0E02739g	CAGL0E05566g	CAGL0E04752g		CAGL0D05280g						CAGL0D05280g	Temporally induced
	CAGL0F03069g	CAGL0E01705g	CAGL0E02761g	CAGL0E05632g	CAGL0E04906g		CAGL0D05302g						CAGL0D05302g	Temporally induced
	CAGL0F03663g	CAGL0E01727g	CAGL0E03003g	CAGL0E05654g	CAGL0E04994g		CAGL0D05434g						CAGL0D05434g	Temporally induced
	CAGL0F03927g	CAGL0E01793g	CAGL0E03025g	CAGL0E05984g	CAGL0E05170g		CAGL0D05478g						CAGL0D05478g	Temporally induced
	CAGL0F04191g	CAGL0E01837g	CAGL0E03113g	CAGL0E06072g	CAGL0E05346g		CAGL0D05544g						CAGL0D05544g	Temporally induced
	CAGL0F04213g	CAGL0E01969g	CAGL0E03157g	CAGL0E06138g	CAGL0E05390g		CAGL0D05566g						CAGL0D05566g	Temporally induced
	CAGL0F04257g	CAGL0E01991g	CAGL0E03245g	CAGL0E06160g	CAGL0E05456g		CAGL0D05632g						CAGL0D05632g	Temporally induced
	CAGL0F04279g	CAGL0E02013g	CAGL0E03267g	CAGL0E06358g	CAGL0E05566g		CAGL0D05918g						CAGL0D05918g	Temporally induced
	CAGL0F04587g	CAGL0E02233g	CAGL0E03289g	CAGL0F00132g	CAGL0E05632g		CAGL0D05940g						CAGL0D05940g	Temporally induced
	CAGL0F04807g	CAGL0E02255g	CAGL0E03366g	CAGL0F00176g	CAGL0E05654g		CAGL0D06160g						CAGL0D06160g	Temporally induced
	CAGL0F04829g	CAGL0E02315g	CAGL0E03498g	CAGL0F00187g	CAGL0E05984g		CAGL0D06270g						CAGL0D06270g	Temporally induced
	CAGL0F04895g	CAGL0E02321g	CAGL0E03520g	CAGL0F00407g	CAGL0E06072g		CAGL0D06292g						CAGL0D06292g	Temporally induced
	CAGL0F05115g	CAGL0E02409g	CAGL0E03564g	CAGL0F00605g	CAGL0E06138g		CAGL0D06402g						CAGL0D06402g	Temporally induced
	CAGL0F05329g	CAGL0E02453g	CAGL0E03652g	CAGL0F00715g	CAGL0E06160g		CAGL0D06424g						CAGL0D06424g	Temporally induced
	CAGL0F06017g	CAGL0E02739g	CAGL0E03938g	CAGL0F00759g	CAGL0E06358g		CAGL0D06556g						CAGL0D06556g	Temporally induced
	CAGL0F06259g	CAGL0E02761g	CAGL0E03960g	CAGL0F01045g	CAGL0F00132g		CAGL0D06578g						CAGL0D06578g	Temporally induced
	CAGL0F06413g	CAGL0E03003g	CAGL0E04048g	CAGL0F01199g	CAGL0F00176g		CAGL0D06600g						CAGL0D06600g	Temporally induced
	CAGL0F06721g	CAGL0E03025g	CAGL0E04092g	CAGL0F01221g	CAGL0F00187g		CAGL0D06688g						CAGL0D06688g	Temporally induced
	CAGL0F06831g	CAGL0E03113g	CAGL0E04312g	CAGL0F01265g	CAGL0F00407g		CAGL0D06732g						CAGL0D06732g	Temporally induced
	CAGL0F07029g	CAGL0E03157g	CAGL0E04334g	CAGL0F01287g	CAGL0F00605g		CAGL0E00231g						CAGL0E00231g	Temporally induced
	CAGL0F07073g	CAGL0E03245g	CAGL0E04356g	CAGL0F01419g	CAGL0F00715g		CAGL0E00363g						CAGL0E00363g	Temporally induced
	CAGL0F07095g	CAGL0E03267g	CAGL0E04548g	CAGL0F01463g	CAGL0F00759g		CAGL0E00561g						CAGL0E00561g	Temporally induced
	CAGL0F07249g	CAGL0E03289g	CAGL0E04598g	CAGL0F01485g	CAGL0F01045g		CAGL0E00605g						CAGL0E00605g	Temporally induced
	CAGL0F07381g	CAGL0E03366g	CAGL0E04620g	CAGL0F01507g	CAGL0F01199g		CAGL0E00649g						CAGL0E00649g	Temporally induced
	CAGL0F07513g	CAGL0E03498g	CAGL0E04752g	CAGL0F01683g	CAGL0F01221g		CAGL0E00671g						CAGL0E00671g	Temporally induced
	CAGL0F07535g	CAGL0E03520g	CAGL0E04774g	CAGL0F01749g	CAGL0F01265g		CAGL0E00715g						CAGL0E00715g	Temporally induced
	CAGL0F07579g	CAGL0E03564g	CAGL0E04906g	CAGL0F01793g	CAGL0F01287g		CAGL0E00737g						CAGL0E00737g	Temporally induced
	CAGL0F07601g	CAGL0E03652g	CAGL0E04994g	CAGL0F01815g	CAGL0F01419g		CAGL0E00759g						CAGL0E00759g	Temporally induced
	CAGL0F07777g	CAGL0E03938g	CAGL0E05170g	CAGL0F02387g	CAGL0F01463g		CAGL0E00781g						CAGL0E00781g	Temporally induced
	CAGL0F07953g	CAGL0E03960g	CAGL0E05346g	CAGL0F02431g	CAGL0F01485g		CAGL0E00803g						CAGL0E00803g	Temporally induced
	CAGL0F08041g	CAGL0E04048g	CAGL0E05566g	CAGL0F02563g	CAGL0F01507g		CAGL0E00869g						CAGL0E00869g	Temporally induced
	CAGL0F08063g	CAGL0E04092g	CAGL0E05632g	CAGL0F02695g	CAGL0F01683g		CAGL0E00891g						CAGL0E00891g	Temporally induced
	CAGL0F08085g	CAGL0E04312g	CAGL0E05654g	CAGL0F02717g	CAGL0F01749g		CAGL0E00935g						CAGL0E00935g	Temporally induced
	CAGL0F08107g	CAGL0E04334g	CAGL0E05984g	CAGL0F02937g	CAGL0F01793g		CAGL0E01023g						CAGL0E01023g	Temporally induced
	CAGL0F08261g	CAGL0E04356g	CAGL0E06072g	CAGL0F03003g	CAGL0F01815g		CAGL0E01133g						CAGL0E01133g	Temporally induced
	CAGL0F08547g	CAGL0E04598g	CAGL0E06138g	CAGL0F03069g	CAGL0F01969g		CAGL0E01155g						CAGL0E01155g	Temporally induced
	CAGL0F08701g	CAGL0E04620g	CAGL0E06160g	CAGL0F03399g	CAGL0F02387g		CAGL0E01177g						CAGL0E01177g	Temporally induced
	CAGL0F08723g	CAGL0E04752g	CAGL0E06358g	CAGL0F03487g	CAGL0F02563g		CAGL0E01199g						CAGL0E01199g	Temporally induced
	CAGL0F08745g	CAGL0E04906g	CAGL0E06424g	CAGL0F03663g	CAGL0F02695g		CAGL0E01221g						CAGL0E01221g	Temporally induced
	CAGL0F08833g	CAGL0E04994g	CAGL0F00132g	CAGL0F03927g	CAGL0F02717g		CAGL0E01243g						CAGL0E01243g	Temporally induced
	CAGL0F09031g	CAGL0E05016g	CAGL0F00176g	CAGL0F04125g	CAGL0F02937g		CAGL0E01287g						CAGL0E01287g	Temporally induced
	CAGL0G00220g	CAGL0E05346g	CAGL0F00187g	CAGL0F04213g	CAGL0F03003g		CAGL0E01331g						CAGL0E01331g	Temporally induced
	CAGL0G00286g	CAGL0E05566g	CAGL0F00231g	CAGL0F04257g	CAGL0F03069g		CAGL0E01353g						CAGL0E01353g	Temporally induced
	CAGL0G00308g	CAGL0E05632g	CAGL0F00407g	CAGL0F04279g	CAGL0F03399g		CAGL0E01463g						CAGL0E01463g	Temporally induced
	CAGL0G00858g	CAGL0E05654g	CAGL0F00605g	CAGL0F04499g	CAGL0F03487g		CAGL0E01661g						CAGL0E01661g	Temporally induced
	CAGL0G00968g	CAGL0E05940g	CAGL0F00693g	CAGL0F04631g	CAGL0F03663g		CAGL0E01683g						CAGL0E01683g	Temporally induced
	CAGL0G00990g	CAGL0E05984g	CAGL0F00715g	CAGL0F04807g	CAGL0F03927g		CAGL0E01705g						CAGL0E01705g	Temporally induced
	CAGL0G01034g	CAGL0E06072g	CAGL0F00759g	CAGL0F04829g	CAGL0F04125g		CAGL0E01727g						CAGL0E01727g	Temporally induced
	CAGL0G01078g	CAGL0E06138g	CAGL0F01045g	CAGL0F04873g	CAGL0F04213g		CAGL0E01793g						CAGL0E01793g	Temporally induced
	CAGL0G01364g	CAGL0E06160g	CAGL0F01199g	CAGL0F04895g	CAGL0F04257g		CAGL0E01837g						CAGL0E01837g	Temporally induced
	CAGL0G01540g	CAGL0E06358g	CAGL0F01221g	CAGL0F05115g	CAGL0F04279g		CAGL0E01881g						CAGL0E01881g	Temporally induced
	CAGL0G01738g	CAGL0E06424g	CAGL0F01265g	CAGL0F05329g	CAGL0F04499g		CAGL0E01969g						CAGL0E01969g	Temporally induced
	CAGL0G01804g	CAGL0F00132g	CAGL0F01287g	CAGL0F05687g	CAGL0F04631g		CAGL0E01991g						CAGL0E01991g	Temporally induced
	CAGL0G01826g	CAGL0F00176g	CAGL0F01419g	CAGL0F06017g	CAGL0F04807g		CAGL0E02013g						CAGL0E02013g	Temporally induced
	CAGL0G01848g	CAGL0F00231g	CAGL0F01463g	CAGL0F06325g	CAGL0F04829g		CAGL0E02233g						CAGL0E02233g	Temporally induced
	CAGL0G01881g	CAGL0F00407g	CAGL0F01485g	CAGL0F06391g	CAGL0F04873g		CAGL0E02255g						CAGL0E02255g	Temporally induced
	CAGL0G01892g	CAGL0F00605g	CAGL0F01507g	CAGL0F06413g	CAGL0F04895g		CAGL0E02315g						CAGL0E02315g	Temporally induced
	CAGL0G02013g	CAGL0F00693g	CAGL0F01683g	CAGL0F06693g	CAGL0F05115g		CAGL0E02321g						CAGL0E02321g	Temporally induced
	CAGL0G02035g	CAGL0F00715g	CAGL0F01749g	CAGL0F06809g	CAGL0F05329g		CAGL0E02409g						CAGL0E02409g	Temporally induced
	CAGL0G02079g	CAGL0F00759g	CAGL0F01793g	CAGL0F06831g	CAGL0F05687g		CAGL0E02453g						CAGL0E02453g	Temporally induced
	CAGL0G02101g	CAGL0F01045g	CAGL0F01815g	CAGL0F07007g	CAGL0F05863g		CAGL0E02739g						CAGL0E02739g	Temporally induced
	CAGL0G02123g	CAGL0F01199g	CAGL0F01969g	CAGL0F07029g	CAGL0F06017g		CAGL0E02761g						CAGL0E02761g	Temporally induced
	CAGL0G02453g	CAGL0F01221g	CAGL0F02013g	CAGL0F07073g	CAGL0F06259g		CAGL0E02915g						CAGL0E02915g	Temporally induced
	CAGL0G02475g	CAGL0F01265g	CAGL0F02387g	CAGL0F07095g	CAGL0F06413g		CAGL0E03003g						CAGL0E03003g	Temporally induced
	CAGL0G02673g	CAGL0F01287g	CAGL0F02563g	CAGL0F07249g	CAGL0F06693g		CAGL0E03025g						CAGL0E03025g	Temporally induced
	CAGL0G02739g	CAGL0F01463g	CAGL0F02695g	CAGL0F07359g	CAGL0F06809g		CAGL0E03113g						CAGL0E03113g	Temporally induced
	CAGL0G02849g	CAGL0F01485g	CAGL0F02717g	CAGL0F07513g	CAGL0F06831g		CAGL0E03157g						CAGL0E03157g	Temporally induced
	CAGL0G02871g	CAGL0F01507g	CAGL0F02937g	CAGL0F07579g	CAGL0F07007g		CAGL0E03245g						CAGL0E03245g	Temporally induced
	CAGL0G02915g	CAGL0F01683g	CAGL0F03069g	CAGL0F07601g	CAGL0F07029g		CAGL0E03267g						CAGL0E03267g	Temporally induced
	CAGL0G03553g	CAGL0F01727g	CAGL0F03091g	CAGL0F07777g	CAGL0F07073g		CAGL0E03289g						CAGL0E03289g	Temporally induced
	CAGL0G03575g	CAGL0F01749g	CAGL0F03289g	CAGL0F07799g	CAGL0F07095g		CAGL0E03366g						CAGL0E03366g	Temporally induced
	CAGL0G03751g	CAGL0F01793g	CAGL0F03399g	CAGL0F07865g	CAGL0F07249g		CAGL0E03498g						CAGL0E03498g	Temporally induced
	CAGL0G03773g	CAGL0F01815g	CAGL0F03487g	CAGL0F07909g	CAGL0F07359g		CAGL0E03520g						CAGL0E03520g	Temporally induced
	CAGL0G03795g	CAGL0F01837g	CAGL0F03641g	CAGL0F07953g	CAGL0F07513g		CAGL0E03564g						CAGL0E03564g	Temporally induced
	CAGL0G03971g	CAGL0F01947g	CAGL0F03663g	CAGL0F08041g	CAGL0F07535g		CAGL0E03652g						CAGL0E03652g	Temporally induced
	CAGL0G04807g	CAGL0F01969g	CAGL0F03927g	CAGL0F08063g	CAGL0F07579g		CAGL0E03938g						CAGL0E03938g	Temporally induced
	CAGL0G04895g	CAGL0F02387g	CAGL0F04191g	CAGL0F08085g	CAGL0F07601g		CAGL0E03960g						CAGL0E03960g	Temporally induced
	CAGL0G05027g	CAGL0F02431g	CAGL0F04213g	CAGL0F08107g	CAGL0F07777g		CAGL0E04048g						CAGL0E04048g	Temporally induced
	CAGL0G05071g	CAGL0F02563g	CAGL0F04257g	CAGL0F08261g	CAGL0F07865g		CAGL0E04092g						CAGL0E04092g	Temporally induced
	CAGL0G05291g	CAGL0F02695g	CAGL0F04279g	CAGL0F08547g	CAGL0F07909g		CAGL0E04268g						CAGL0E04268g	Temporally induced
	CAGL0G05313g	CAGL0F02937g	CAGL0F04411g	CAGL0F08723g	CAGL0F07953g		CAGL0E04312g						CAGL0E04312g	Temporally induced
	CAGL0G05329g	CAGL0F03069g	CAGL0F04499g	CAGL0F08745g	CAGL0F08041g		CAGL0E04334g						CAGL0E04334g	Temporally induced
	CAGL0G05335g	CAGL0F03399g	CAGL0F04631g	CAGL0F09031g	CAGL0F08063g		CAGL0E04356g						CAGL0E04356g	Temporally induced
	CAGL0G05544g	CAGL0F03487g	CAGL0F04807g	CAGL0F09207g	CAGL0F08085g		CAGL0E04548g						CAGL0E04548g	Temporally induced
	CAGL0G05566g	CAGL0F03641g	CAGL0F04829g	CAGL0G00154g	CAGL0F08107g		CAGL0E04554g						CAGL0E04554g	Temporally induced
	CAGL0G05830g	CAGL0F03663g	CAGL0F04873g	CAGL0G00220g	CAGL0F08261g		CAGL0E04598g						CAGL0E04598g	Temporally induced
	CAGL0G05874g	CAGL0F03927g	CAGL0F04895g	CAGL0G00264g	CAGL0F08547g		CAGL0E04620g						CAGL0E04620g	Temporally induced
	CAGL0G05940g	CAGL0F04103g	CAGL0F05115g	CAGL0G00286g	CAGL0F08569g		CAGL0E04752g						CAGL0E04752g	Temporally induced
	CAGL0G06006g	CAGL0F04191g	CAGL0F05329g	CAGL0G00308g	CAGL0F08723g		CAGL0E04774g						CAGL0E04774g	Temporally induced
	CAGL0G06050g	CAGL0F04213g	CAGL0F05687g	CAGL0G00968g	CAGL0F08745g		CAGL0E04906g						CAGL0E04906g	Temporally induced
	CAGL0G06072g	CAGL0F04257g	CAGL0F05863g	CAGL0G00990g	CAGL0F09031g		CAGL0E04994g						CAGL0E04994g	Temporally induced
	CAGL0G06094g	CAGL0F04279g	CAGL0F06017g	CAGL0G01034g	CAGL0G00154g		CAGL0E05016g						CAGL0E05016g	Temporally induced
	CAGL0G06358g	CAGL0F04411g	CAGL0F06259g	CAGL0G01078g	CAGL0G00220g		CAGL0E05170g						CAGL0E05170g	Temporally induced
	CAGL0G06380g	CAGL0F04499g	CAGL0F06325g	CAGL0G01122g	CAGL0G00264g		CAGL0E05346g						CAGL0E05346g	Temporally induced
	CAGL0G06490g	CAGL0F04807g	CAGL0F06347g	CAGL0G01254g	CAGL0G00286g		CAGL0E05390g						CAGL0E05390g	Temporally induced
	CAGL0G06732g	CAGL0F04829g	CAGL0F06391g	CAGL0G01320g	CAGL0G00308g		CAGL0E05456g						CAGL0E05456g	Temporally induced
	CAGL0G06798g	CAGL0F04873g	CAGL0F06413g	CAGL0G01364g	CAGL0G00968g		CAGL0E05478g						CAGL0E05478g	Temporally induced
	CAGL0G07227g	CAGL0F04895g	CAGL0F06693g	CAGL0G01540g	CAGL0G00990g		CAGL0E05500g						CAGL0E05500g	Temporally induced
	CAGL0G07249g	CAGL0F05115g	CAGL0F06721g	CAGL0G01738g	CAGL0G01034g		CAGL0E05566g						CAGL0E05566g	Temporally induced
	CAGL0G07271g	CAGL0F05329g	CAGL0F06809g	CAGL0G01804g	CAGL0G01078g		CAGL0E05632g						CAGL0E05632g	Temporally induced
	CAGL0G07315g	CAGL0F05863g	CAGL0F06831g	CAGL0G01826g	CAGL0G01122g		CAGL0E05654g						CAGL0E05654g	Temporally induced
	CAGL0G07337g	CAGL0F06017g	CAGL0F06875g	CAGL0G01848g	CAGL0G01254g		CAGL0E05940g						CAGL0E05940g	Temporally induced
	CAGL0G07469g	CAGL0F06259g	CAGL0F07007g	CAGL0G01881g	CAGL0G01320g		CAGL0E05984g						CAGL0E05984g	Temporally induced
	CAGL0G07491g	CAGL0F06325g	CAGL0F07029g	CAGL0G01892g	CAGL0G01364g		CAGL0E06072g						CAGL0E06072g	Temporally induced
	CAGL0G07623g	CAGL0F06347g	CAGL0F07073g	CAGL0G02013g	CAGL0G01540g		CAGL0E06138g						CAGL0E06138g	Temporally induced
	CAGL0G07667g	CAGL0F06391g	CAGL0F07095g	CAGL0G02035g	CAGL0G01738g		CAGL0E06160g						CAGL0E06160g	Temporally induced
	CAGL0G07821g	CAGL0F06413g	CAGL0F07117g	CAGL0G02057g	CAGL0G01804g		CAGL0E06358g						CAGL0E06358g	Temporally induced
	CAGL0G07953g	CAGL0F06693g	CAGL0F07249g	CAGL0G02079g	CAGL0G01826g		CAGL0E06424g						CAGL0E06424g	Temporally induced
	CAGL0G08041g	CAGL0F06721g	CAGL0F07359g	CAGL0G02101g	CAGL0G01848g		CAGL0E06666g						CAGL0E06666g	Temporally induced
	CAGL0G08063g	CAGL0F06809g	CAGL0F07513g	CAGL0G02123g	CAGL0G01881g		CAGL0F00105g						CAGL0F00105g	Temporally induced
	CAGL0G08151g	CAGL0F06831g	CAGL0F07535g	CAGL0G02255g	CAGL0G01892g		CAGL0F00110g						CAGL0F00110g	Temporally induced
	CAGL0G08173g	CAGL0F06875g	CAGL0F07579g	CAGL0G02277g	CAGL0G02013g		CAGL0F00132g						CAGL0F00132g	Temporally induced
	CAGL0G08195g	CAGL0F06897g	CAGL0F07601g	CAGL0G02453g	CAGL0G02035g		CAGL0F00176g						CAGL0F00176g	Temporally induced
	CAGL0G08217g	CAGL0F07007g	CAGL0F07777g	CAGL0G02475g	CAGL0G02057g		CAGL0F00187g						CAGL0F00187g	Temporally induced
	CAGL0G08228g	CAGL0F07029g	CAGL0F07799g	CAGL0G02585g	CAGL0G02079g		CAGL0F00231g						CAGL0F00231g	Temporally induced
	CAGL0G08558g	CAGL0F07073g	CAGL0F07865g	CAGL0G02673g	CAGL0G02101g		CAGL0F00407g						CAGL0F00407g	Temporally induced
	CAGL0G08734g	CAGL0F07095g	CAGL0F07953g	CAGL0G02849g	CAGL0G02123g		CAGL0F00561g						CAGL0F00561g	Temporally induced
	CAGL0G08954g	CAGL0F07249g	CAGL0F08041g	CAGL0G02871g	CAGL0G02255g		CAGL0F00605g						CAGL0F00605g	Temporally induced
	CAGL0G09130g	CAGL0F07359g	CAGL0F08063g	CAGL0G02915g	CAGL0G02277g		CAGL0F00693g						CAGL0F00693g	Temporally induced
	CAGL0G09262g	CAGL0F07381g	CAGL0F08085g	CAGL0G02937g	CAGL0G02453g		CAGL0F00715g						CAGL0F00715g	Temporally induced
	CAGL0G09361g	CAGL0F07513g	CAGL0F08107g	CAGL0G03157g	CAGL0G02475g		CAGL0F00759g						CAGL0F00759g	Temporally induced
	CAGL0G09383g	CAGL0F07535g	CAGL0F08261g	CAGL0G03289g	CAGL0G02585g		CAGL0F01045g						CAGL0F01045g	Temporally induced
	CAGL0G09449g	CAGL0F07579g	CAGL0F08547g	CAGL0G03465g	CAGL0G02673g		CAGL0F01089g						CAGL0F01089g	Temporally induced
	CAGL0G09515g	CAGL0F07601g	CAGL0F08723g	CAGL0G03531g	CAGL0G02849g		CAGL0F01199g						CAGL0F01199g	Temporally induced
	CAGL0G09581g	CAGL0F07777g	CAGL0F08745g	CAGL0G03553g	CAGL0G02871g		CAGL0F01221g						CAGL0F01221g	Temporally induced
	CAGL0G09669g	CAGL0F07953g	CAGL0F08833g	CAGL0G03575g	CAGL0G02915g		CAGL0F01265g						CAGL0F01265g	Temporally induced
	CAGL0G09713g	CAGL0F08041g	CAGL0F09031g	CAGL0G03641g	CAGL0G02937g		CAGL0F01287g						CAGL0F01287g	Temporally induced
	CAGL0G09955g	CAGL0F08063g	CAGL0G00154g	CAGL0G03773g	CAGL0G03289g		CAGL0F01419g						CAGL0F01419g	Temporally induced
	CAGL0G10175g	CAGL0F08085g	CAGL0G00220g	CAGL0G03795g	CAGL0G03465g		CAGL0F01463g						CAGL0F01463g	Temporally induced
	CAGL0G10219g	CAGL0F08107g	CAGL0G00286g	CAGL0G03971g	CAGL0G03531g		CAGL0F01485g						CAGL0F01485g	Temporally induced
	CAGL0H00121g	CAGL0F08261g	CAGL0G00308g	CAGL0G04213g	CAGL0G03553g		CAGL0F01507g						CAGL0F01507g	Temporally induced
	CAGL0H00132g	CAGL0F08547g	CAGL0G00968g	CAGL0G04433g	CAGL0G03575g		CAGL0F01683g						CAGL0F01683g	Temporally induced
	CAGL0H00462g	CAGL0F08569g	CAGL0G00990g	CAGL0G04499g	CAGL0G03663g		CAGL0F01727g						CAGL0F01727g	Temporally induced
	CAGL0H00506g	CAGL0F08723g	CAGL0G01034g	CAGL0G04631g	CAGL0G03773g		CAGL0F01749g						CAGL0F01749g	Temporally induced
	CAGL0H00704g	CAGL0F08745g	CAGL0G01078g	CAGL0G04763g	CAGL0G03795g		CAGL0F01793g						CAGL0F01793g	Temporally induced
	CAGL0H00935g	CAGL0F08833g	CAGL0G01122g	CAGL0G04807g	CAGL0G03971g		CAGL0F01815g						CAGL0F01815g	Temporally induced
	CAGL0H01287g	CAGL0F09031g	CAGL0G01254g	CAGL0G04895g	CAGL0G04213g		CAGL0F01837g						CAGL0F01837g	Temporally induced
	CAGL0H01353g	CAGL0F09207g	CAGL0G01364g	CAGL0G05027g	CAGL0G04499g		CAGL0F01947g						CAGL0F01947g	Temporally induced
	CAGL0H01606g	CAGL0G00154g	CAGL0G01540g	CAGL0G05269g	CAGL0G04763g		CAGL0F01969g						CAGL0F01969g	Temporally induced
	CAGL0H01837g	CAGL0G00220g	CAGL0G01716g	CAGL0G05313g	CAGL0G04807g		CAGL0F02013g						CAGL0F02013g	Temporally induced
	CAGL0H01859g	CAGL0G00286g	CAGL0G01738g	CAGL0G05329g	CAGL0G04895g		CAGL0F02387g						CAGL0F02387g	Temporally induced
	CAGL0H01881g	CAGL0G00308g	CAGL0G01804g	CAGL0G05335g	CAGL0G05027g		CAGL0F02431g						CAGL0F02431g	Temporally induced
	CAGL0H01947g	CAGL0G00968g	CAGL0G01826g	CAGL0G05544g	CAGL0G05269g		CAGL0F02563g						CAGL0F02563g	Temporally induced
	CAGL0H02057g	CAGL0G00990g	CAGL0G01848g	CAGL0G05566g	CAGL0G05291g		CAGL0F02695g						CAGL0F02695g	Temporally induced
	CAGL0H02101g	CAGL0G01034g	CAGL0G01881g	CAGL0G05764g	CAGL0G05313g		CAGL0F02717g						CAGL0F02717g	Temporally induced
	CAGL0H02365g	CAGL0G01078g	CAGL0G01892g	CAGL0G05830g	CAGL0G05329g		CAGL0F02937g						CAGL0F02937g	Temporally induced
	CAGL0H02387g	CAGL0G01254g	CAGL0G02013g	CAGL0G05940g	CAGL0G05335g		CAGL0F03003g						CAGL0F03003g	Temporally induced
	CAGL0H02409g	CAGL0G01320g	CAGL0G02035g	CAGL0G06006g	CAGL0G05544g		CAGL0F03069g						CAGL0F03069g	Temporally induced
	CAGL0H02491g	CAGL0G01364g	CAGL0G02057g	CAGL0G06028g	CAGL0G05566g		CAGL0F03091g						CAGL0F03091g	Temporally induced
	CAGL0H02541g	CAGL0G01540g	CAGL0G02079g	CAGL0G06050g	CAGL0G05764g		CAGL0F03289g						CAGL0F03289g	Temporally induced
	CAGL0H02563g	CAGL0G01738g	CAGL0G02101g	CAGL0G06138g	CAGL0G05830g		CAGL0F03399g						CAGL0F03399g	Temporally induced
	CAGL0H02585g	CAGL0G01804g	CAGL0G02123g	CAGL0G06248g	CAGL0G05940g		CAGL0F03487g						CAGL0F03487g	Temporally induced
	CAGL0H03531g	CAGL0G01826g	CAGL0G02255g	CAGL0G06380g	CAGL0G06006g		CAGL0F03641g						CAGL0F03641g	Temporally induced
	CAGL0H03553g	CAGL0G01848g	CAGL0G02277g	CAGL0G06490g	CAGL0G06028g		CAGL0F03663g						CAGL0F03663g	Temporally induced
	CAGL0H03685g	CAGL0G01881g	CAGL0G02453g	CAGL0G06732g	CAGL0G06050g		CAGL0F03927g						CAGL0F03927g	Temporally induced
	CAGL0H03729g	CAGL0G01892g	CAGL0G02475g	CAGL0G06776g	CAGL0G06094g		CAGL0F04103g						CAGL0F04103g	Temporally induced
	CAGL0H03993g	CAGL0G01903g	CAGL0G02585g	CAGL0G06798g	CAGL0G06138g		CAGL0F04125g						CAGL0F04125g	Temporally induced
	CAGL0H04081g	CAGL0G01991g	CAGL0G02673g	CAGL0G07106g	CAGL0G06248g		CAGL0F04191g						CAGL0F04191g	Temporally induced
	CAGL0H04191g	CAGL0G02013g	CAGL0G02695g	CAGL0G07227g	CAGL0G06380g		CAGL0F04213g						CAGL0F04213g	Temporally induced
	CAGL0H04257g	CAGL0G02035g	CAGL0G02849g	CAGL0G07249g	CAGL0G06490g		CAGL0F04257g						CAGL0F04257g	Temporally induced
	CAGL0H04279g	CAGL0G02057g	CAGL0G02871g	CAGL0G07271g	CAGL0G06732g		CAGL0F04279g						CAGL0F04279g	Temporally induced
	CAGL0H04521g	CAGL0G02079g	CAGL0G02915g	CAGL0G07315g	CAGL0G06776g		CAGL0F04411g						CAGL0F04411g	Temporally induced
	CAGL0H04631g	CAGL0G02101g	CAGL0G03289g	CAGL0G07337g	CAGL0G06798g		CAGL0F04499g						CAGL0F04499g	Temporally induced
	CAGL0H04653g	CAGL0G02123g	CAGL0G03531g	CAGL0G07469g	CAGL0G07227g		CAGL0F04587g						CAGL0F04587g	Temporally induced
	CAGL0H04675g	CAGL0G02189g	CAGL0G03553g	CAGL0G07491g	CAGL0G07249g		CAGL0F04631g						CAGL0F04631g	Temporally induced
	CAGL0H04691g	CAGL0G02255g	CAGL0G03575g	CAGL0G07601g	CAGL0G07271g		CAGL0F04807g						CAGL0F04807g	Temporally induced
	CAGL0H04763g	CAGL0G02277g	CAGL0G03641g	CAGL0G07623g	CAGL0G07315g		CAGL0F04829g						CAGL0F04829g	Temporally induced
	CAGL0H05445g	CAGL0G02453g	CAGL0G03663g	CAGL0G07667g	CAGL0G07337g		CAGL0F04873g						CAGL0F04873g	Temporally induced
	CAGL0H05511g	CAGL0G02475g	CAGL0G03751g	CAGL0G07931g	CAGL0G07469g		CAGL0F04895g						CAGL0F04895g	Temporally induced
	CAGL0H05643g	CAGL0G02585g	CAGL0G03773g	CAGL0G07953g	CAGL0G07491g		CAGL0F05115g						CAGL0F05115g	Temporally induced
	CAGL0H06105g	CAGL0G02673g	CAGL0G03795g	CAGL0G08019g	CAGL0G07601g		CAGL0F05329g						CAGL0F05329g	Temporally induced
	CAGL0H06215g	CAGL0G02849g	CAGL0G03883g	CAGL0G08041g	CAGL0G07623g		CAGL0F05687g						CAGL0F05687g	Temporally induced
	CAGL0H06369g	CAGL0G02871g	CAGL0G03905g	CAGL0G08063g	CAGL0G07667g		CAGL0F05863g						CAGL0F05863g	Temporally induced
	CAGL0H06413g	CAGL0G02915g	CAGL0G03971g	CAGL0G08151g	CAGL0G07931g		CAGL0F06017g						CAGL0F06017g	Temporally induced
	CAGL0H06435g	CAGL0G03289g	CAGL0G04213g	CAGL0G08173g	CAGL0G07953g		CAGL0F06259g						CAGL0F06259g	Temporally induced
	CAGL0H06633g	CAGL0G03553g	CAGL0G04499g	CAGL0G08195g	CAGL0G08019g		CAGL0F06325g						CAGL0F06325g	Temporally induced
	CAGL0H06677g	CAGL0G03575g	CAGL0G04763g	CAGL0G08217g	CAGL0G08041g		CAGL0F06347g						CAGL0F06347g	Temporally induced
	CAGL0H06787g	CAGL0G03663g	CAGL0G04807g	CAGL0G08228g	CAGL0G08063g		CAGL0F06391g						CAGL0F06391g	Temporally induced
	CAGL0H07023g	CAGL0G03729g	CAGL0G04851g	CAGL0G08624g	CAGL0G08151g		CAGL0F06413g						CAGL0F06413g	Temporally induced
	CAGL0H07315g	CAGL0G03773g	CAGL0G04895g	CAGL0G08734g	CAGL0G08173g		CAGL0F06693g						CAGL0F06693g	Temporally induced
	CAGL0H08173g	CAGL0G03795g	CAGL0G05027g	CAGL0G08954g	CAGL0G08195g		CAGL0F06721g						CAGL0F06721g	Temporally induced
	CAGL0H08195g	CAGL0G03971g	CAGL0G05269g	CAGL0G09064g	CAGL0G08228g		CAGL0F06809g						CAGL0F06809g	Temporally induced
	CAGL0H08305g	CAGL0G04631g	CAGL0G05291g	CAGL0G09130g	CAGL0G08624g		CAGL0F06831g						CAGL0F06831g	Temporally induced
	CAGL0H08327g	CAGL0G04763g	CAGL0G05313g	CAGL0G09383g	CAGL0G08712g		CAGL0F06875g						CAGL0F06875g	Temporally induced
	CAGL0H08371g	CAGL0G04807g	CAGL0G05329g	CAGL0G09515g	CAGL0G08734g		CAGL0F06897g						CAGL0F06897g	Temporally induced
	CAGL0H08393g	CAGL0G04851g	CAGL0G05335g	CAGL0G09537g	CAGL0G08954g		CAGL0F07007g						CAGL0F07007g	Temporally induced
	CAGL0H08525g	CAGL0G04895g	CAGL0G05544g	CAGL0G09581g	CAGL0G09064g		CAGL0F07029g						CAGL0F07029g	Temporally induced
	CAGL0H08541g	CAGL0G05027g	CAGL0G05566g	CAGL0G09603g	CAGL0G09130g		CAGL0F07073g						CAGL0F07073g	Temporally induced
	CAGL0H08547g	CAGL0G05071g	CAGL0G05764g	CAGL0G09669g	CAGL0G09361g		CAGL0F07095g						CAGL0F07095g	Temporally induced
	CAGL0H08734g	CAGL0G05269g	CAGL0G05830g	CAGL0G09713g	CAGL0G09383g		CAGL0F07117g						CAGL0F07117g	Temporally induced
	CAGL0H08866g	CAGL0G05291g	CAGL0G05874g	CAGL0G09955g	CAGL0G09515g		CAGL0F07249g						CAGL0F07249g	Temporally induced
	CAGL0H08888g	CAGL0G05313g	CAGL0G05940g	CAGL0G09977g	CAGL0G09537g		CAGL0F07359g						CAGL0F07359g	Temporally induced
	CAGL0H08976g	CAGL0G05329g	CAGL0G06006g	CAGL0G10175g	CAGL0G09581g		CAGL0F07381g						CAGL0F07381g	Temporally induced
	CAGL0H09086g	CAGL0G05335g	CAGL0G06028g	CAGL0H00418g	CAGL0G09603g		CAGL0F07513g						CAGL0F07513g	Temporally induced
	CAGL0H09130g	CAGL0G05544g	CAGL0G06050g	CAGL0H00462g	CAGL0G09669g		CAGL0F07535g						CAGL0F07535g	Temporally induced
	CAGL0H09152g	CAGL0G05566g	CAGL0G06094g	CAGL0H00506g	CAGL0G09691g		CAGL0F07579g						CAGL0F07579g	Temporally induced
	CAGL0H09196g	CAGL0G05764g	CAGL0G06138g	CAGL0H00572g	CAGL0G09713g		CAGL0F07601g						CAGL0F07601g	Temporally induced
	CAGL0H09834g	CAGL0G05830g	CAGL0G06248g	CAGL0H00704g	CAGL0G09955g		CAGL0F07777g						CAGL0F07777g	Temporally induced
	CAGL0H09856g	CAGL0G05940g	CAGL0G06358g	CAGL0H00935g	CAGL0G09977g		CAGL0F07799g						CAGL0F07799g	Temporally induced
	CAGL0H09878g	CAGL0G06006g	CAGL0G06380g	CAGL0H00957g	CAGL0G10175g		CAGL0F07865g						CAGL0F07865g	Temporally induced
	CAGL0H10032g	CAGL0G06028g	CAGL0G06490g	CAGL0H01287g	CAGL0H00418g		CAGL0F07909g						CAGL0F07909g	Temporally induced
	CAGL0H10202g	CAGL0G06050g	CAGL0G06732g	CAGL0H01353g	CAGL0H00462g		CAGL0F07953g						CAGL0F07953g	Temporally induced
	CAGL0H10362g	CAGL0G06094g	CAGL0G06776g	CAGL0H01375g	CAGL0H00506g		CAGL0F08041g						CAGL0F08041g	Temporally induced
	CAGL0H10626g	CAGL0G06138g	CAGL0G06798g	CAGL0H01397g	CAGL0H00704g		CAGL0F08063g						CAGL0F08063g	Temporally induced
	CAGL0I00105g	CAGL0G06358g	CAGL0G07227g	CAGL0H01606g	CAGL0H00935g		CAGL0F08085g						CAGL0F08085g	Temporally induced
	CAGL0I00110g	CAGL0G06380g	CAGL0G07249g	CAGL0H01705g	CAGL0H00957g		CAGL0F08107g						CAGL0F08107g	Temporally induced
	CAGL0I00116g	CAGL0G06490g	CAGL0G07271g	CAGL0H01837g	CAGL0H01287g		CAGL0F08261g						CAGL0F08261g	Temporally induced
	CAGL0I00418g	CAGL0G06732g	CAGL0G07315g	CAGL0H01859g	CAGL0H01353g		CAGL0F08547g						CAGL0F08547g	Temporally induced
	CAGL0I00484g	CAGL0G06776g	CAGL0G07337g	CAGL0H01881g	CAGL0H01375g		CAGL0F08569g						CAGL0F08569g	Temporally induced
	CAGL0I00550g	CAGL0G06798g	CAGL0G07425g	CAGL0H01947g	CAGL0H01397g		CAGL0F08701g						CAGL0F08701g	Temporally induced
	CAGL0I00572g	CAGL0G06974g	CAGL0G07469g	CAGL0H02035g	CAGL0H01529g		CAGL0F08723g						CAGL0F08723g	Temporally induced
	CAGL0I00594g	CAGL0G07106g	CAGL0G07491g	CAGL0H02057g	CAGL0H01606g		CAGL0F08745g						CAGL0F08745g	Temporally induced
	CAGL0I00748g	CAGL0G07227g	CAGL0G07601g	CAGL0H02101g	CAGL0H01705g		CAGL0F08833g						CAGL0F08833g	Temporally induced
	CAGL0I00792g	CAGL0G07249g	CAGL0G07623g	CAGL0H02123g	CAGL0H01837g		CAGL0F09031g						CAGL0F09031g	Temporally induced
	CAGL0I00814g	CAGL0G07271g	CAGL0G07667g	CAGL0H02387g	CAGL0H01859g		CAGL0F09207g						CAGL0F09207g	Temporally induced
	CAGL0I01122g	CAGL0G07315g	CAGL0G07931g	CAGL0H02409g	CAGL0H01881g		CAGL0G00154g						CAGL0G00154g	Temporally induced
	CAGL0I01144g	CAGL0G07337g	CAGL0G07953g	CAGL0H02563g	CAGL0H01947g		CAGL0G00220g						CAGL0G00220g	Temporally induced
	CAGL0I01342g	CAGL0G07469g	CAGL0G08041g	CAGL0H02585g	CAGL0H02035g		CAGL0G00264g						CAGL0G00264g	Temporally induced
	CAGL0I01386g	CAGL0G07491g	CAGL0G08063g	CAGL0H03487g	CAGL0H02057g		CAGL0G00286g						CAGL0G00286g	Temporally induced
	CAGL0I01408g	CAGL0G07601g	CAGL0G08151g	CAGL0H03553g	CAGL0H02101g		CAGL0G00308g						CAGL0G00308g	Temporally induced
	CAGL0I01430g	CAGL0G07623g	CAGL0G08173g	CAGL0H03685g	CAGL0H02123g		CAGL0G00858g						CAGL0G00858g	Temporally induced
	CAGL0I01496g	CAGL0G07667g	CAGL0G08195g	CAGL0H03707g	CAGL0H02387g		CAGL0G00968g						CAGL0G00968g	Temporally induced
	CAGL0I02178g	CAGL0G07931g	CAGL0G08217g	CAGL0H03729g	CAGL0H02409g		CAGL0G00990g						CAGL0G00990g	Temporally induced
	CAGL0I02486g	CAGL0G07953g	CAGL0G08228g	CAGL0H03839g	CAGL0H02563g		CAGL0G01034g						CAGL0G01034g	Temporally induced
	CAGL0I02948g	CAGL0G08041g	CAGL0G08624g	CAGL0H03993g	CAGL0H02585g		CAGL0G01078g						CAGL0G01078g	Temporally induced
	CAGL0I03014g	CAGL0G08063g	CAGL0G08712g	CAGL0H04037g	CAGL0H03487g		CAGL0G01122g						CAGL0G01122g	Temporally induced
	CAGL0I03190g	CAGL0G08151g	CAGL0G08734g	CAGL0H04081g	CAGL0H03553g		CAGL0G01254g						CAGL0G01254g	Temporally induced
	CAGL0I03234g	CAGL0G08173g	CAGL0G08954g	CAGL0H04191g	CAGL0H03685g		CAGL0G01320g						CAGL0G01320g	Temporally induced
	CAGL0I03322g	CAGL0G08195g	CAGL0G09020g	CAGL0H04499g	CAGL0H03707g		CAGL0G01364g						CAGL0G01364g	Temporally induced
	CAGL0I03366g	CAGL0G08217g	CAGL0G09064g	CAGL0H04521g	CAGL0H03729g		CAGL0G01540g						CAGL0G01540g	Temporally induced
	CAGL0I03454g	CAGL0G08228g	CAGL0G09130g	CAGL0H04631g	CAGL0H03839g		CAGL0G01716g						CAGL0G01716g	Temporally induced
	CAGL0I03476g	CAGL0G08624g	CAGL0G09361g	CAGL0H04653g	CAGL0H03905g		CAGL0G01738g						CAGL0G01738g	Temporally induced
	CAGL0I03498g	CAGL0G08668g	CAGL0G09383g	CAGL0H04675g	CAGL0H03993g		CAGL0G01804g						CAGL0G01804g	Temporally induced
	CAGL0I03740g	CAGL0G08712g	CAGL0G09449g	CAGL0H04763g	CAGL0H04037g		CAGL0G01826g						CAGL0G01826g	Temporally induced
	CAGL0I03762g	CAGL0G08734g	CAGL0G09515g	CAGL0H04939g	CAGL0H04081g		CAGL0G01848g						CAGL0G01848g	Temporally induced
	CAGL0I03828g	CAGL0G08954g	CAGL0G09537g	CAGL0H04961g	CAGL0H04191g		CAGL0G01881g						CAGL0G01881g	Temporally induced
	CAGL0I03938g	CAGL0G09064g	CAGL0G09581g	CAGL0H04983g	CAGL0H04279g		CAGL0G01892g						CAGL0G01892g	Temporally induced
	CAGL0I04356g	CAGL0G09130g	CAGL0G09603g	CAGL0H05005g	CAGL0H04499g		CAGL0G01903g						CAGL0G01903g	Temporally induced
	CAGL0I04444g	CAGL0G09361g	CAGL0G09669g	CAGL0H05401g	CAGL0H04521g		CAGL0G01991g						CAGL0G01991g	Temporally induced
	CAGL0I04774g	CAGL0G09383g	CAGL0G09713g	CAGL0H05445g	CAGL0H04631g		CAGL0G02013g						CAGL0G02013g	Temporally induced
	CAGL0I04994g	CAGL0G09449g	CAGL0G09735g	CAGL0H05511g	CAGL0H04653g		CAGL0G02035g						CAGL0G02035g	Temporally induced
	CAGL0I05038g	CAGL0G09515g	CAGL0G09955g	CAGL0H05643g	CAGL0H04675g		CAGL0G02057g						CAGL0G02057g	Temporally induced
	CAGL0I05390g	CAGL0G09537g	CAGL0G09977g	CAGL0H06105g	CAGL0H04763g		CAGL0G02079g						CAGL0G02079g	Temporally induced
	CAGL0I05610g	CAGL0G09581g	CAGL0G10175g	CAGL0H06215g	CAGL0H04939g		CAGL0G02101g						CAGL0G02101g	Temporally induced
	CAGL0I05874g	CAGL0G09603g	CAGL0H00418g	CAGL0H06369g	CAGL0H04961g		CAGL0G02123g						CAGL0G02123g	Temporally induced
	CAGL0I05896g	CAGL0G09669g	CAGL0H00462g	CAGL0H06413g	CAGL0H04983g		CAGL0G02189g						CAGL0G02189g	Temporally induced
	CAGL0I05918g	CAGL0G09691g	CAGL0H00506g	CAGL0H06523g	CAGL0H05005g		CAGL0G02255g						CAGL0G02255g	Temporally induced
	CAGL0I05934g	CAGL0G09713g	CAGL0H00572g	CAGL0H06545g	CAGL0H05401g		CAGL0G02277g						CAGL0G02277g	Temporally induced
	CAGL0I06160g	CAGL0G09955g	CAGL0H00704g	CAGL0H06633g	CAGL0H05445g		CAGL0G02453g						CAGL0G02453g	Temporally induced
	CAGL0I06182g	CAGL0G10153g	CAGL0H00935g	CAGL0H07007g	CAGL0H05511g		CAGL0G02475g						CAGL0G02475g	Temporally induced
	CAGL0I06204g	CAGL0G10175g	CAGL0H00957g	CAGL0H07023g	CAGL0H05643g		CAGL0G02585g						CAGL0G02585g	Temporally induced
	CAGL0I06402g	CAGL0H00418g	CAGL0H01287g	CAGL0H07469g	CAGL0H06105g		CAGL0G02673g						CAGL0G02673g	Temporally induced
	CAGL0I06490g	CAGL0H00462g	CAGL0H01353g	CAGL0H07579g	CAGL0H06215g		CAGL0G02695g						CAGL0G02695g	Temporally induced
	CAGL0I06743g	CAGL0H00506g	CAGL0H01375g	CAGL0H07997g	CAGL0H06369g		CAGL0G02739g						CAGL0G02739g	Temporally induced
	CAGL0I07051g	CAGL0H00572g	CAGL0H01397g	CAGL0H08173g	CAGL0H06413g		CAGL0G02849g						CAGL0G02849g	Temporally induced
	CAGL0I07139g	CAGL0H00704g	CAGL0H01529g	CAGL0H08327g	CAGL0H06435g		CAGL0G02871g						CAGL0G02871g	Temporally induced
	CAGL0I07227g	CAGL0H00913g	CAGL0H01606g	CAGL0H08371g	CAGL0H06523g		CAGL0G02915g						CAGL0G02915g	Temporally induced
	CAGL0I07249g	CAGL0H00935g	CAGL0H01705g	CAGL0H08393g	CAGL0H06545g		CAGL0G02937g						CAGL0G02937g	Temporally induced
	CAGL0I07293g	CAGL0H00957g	CAGL0H01837g	CAGL0H08525g	CAGL0H06633g		CAGL0G03157g						CAGL0G03157g	Temporally induced
	CAGL0I07491g	CAGL0H01287g	CAGL0H01859g	CAGL0H08541g	CAGL0H06677g		CAGL0G03289g						CAGL0G03289g	Temporally induced
	CAGL0I07557g	CAGL0H01353g	CAGL0H01881g	CAGL0H08547g	CAGL0H07007g		CAGL0G03465g						CAGL0G03465g	Temporally induced
	CAGL0I07667g	CAGL0H01375g	CAGL0H01947g	CAGL0H08734g	CAGL0H07023g		CAGL0G03531g						CAGL0G03531g	Temporally induced
	CAGL0I07821g	CAGL0H01397g	CAGL0H02035g	CAGL0H08844g	CAGL0H07469g		CAGL0G03553g						CAGL0G03553g	Temporally induced
	CAGL0I07843g	CAGL0H01529g	CAGL0H02057g	CAGL0H08888g	CAGL0H07579g		CAGL0G03575g						CAGL0G03575g	Temporally induced
	CAGL0I07865g	CAGL0H01606g	CAGL0H02101g	CAGL0H08976g	CAGL0H07997g		CAGL0G03641g						CAGL0G03641g	Temporally induced
	CAGL0I08041g	CAGL0H01705g	CAGL0H02123g	CAGL0H09130g	CAGL0H08173g		CAGL0G03663g						CAGL0G03663g	Temporally induced
	CAGL0I08305g	CAGL0H01837g	CAGL0H02387g	CAGL0H09152g	CAGL0H08305g		CAGL0G03729g						CAGL0G03729g	Temporally induced
	CAGL0I08393g	CAGL0H01859g	CAGL0H02409g	CAGL0H09328g	CAGL0H08327g		CAGL0G03751g						CAGL0G03751g	Temporally induced
	CAGL0I08503g	CAGL0H01881g	CAGL0H02563g	CAGL0H09592g	CAGL0H08371g		CAGL0G03773g						CAGL0G03773g	Temporally induced
	CAGL0I08613g	CAGL0H01947g	CAGL0H02585g	CAGL0H09614g	CAGL0H08393g		CAGL0G03795g						CAGL0G03795g	Temporally induced
	CAGL0I08635g	CAGL0H02035g	CAGL0H03487g	CAGL0H09658g	CAGL0H08525g		CAGL0G03883g						CAGL0G03883g	Temporally induced
	CAGL0I09262g	CAGL0H02057g	CAGL0H03531g	CAGL0H09834g	CAGL0H08541g		CAGL0G03905g						CAGL0G03905g	Temporally induced
	CAGL0I09284g	CAGL0H02101g	CAGL0H03553g	CAGL0H09856g	CAGL0H08547g		CAGL0G03971g						CAGL0G03971g	Temporally induced
	CAGL0I09592g	CAGL0H02123g	CAGL0H03685g	CAGL0H09878g	CAGL0H08734g		CAGL0G04213g						CAGL0G04213g	Temporally induced
	CAGL0I09746g	CAGL0H02387g	CAGL0H03707g	CAGL0H09944g	CAGL0H08844g		CAGL0G04433g						CAGL0G04433g	Temporally induced
	CAGL0I09856g	CAGL0H02409g	CAGL0H03729g	CAGL0H09966g	CAGL0H08888g		CAGL0G04499g						CAGL0G04499g	Temporally induced
	CAGL0I09878g	CAGL0H02491g	CAGL0H03839g	CAGL0H10010g	CAGL0H08976g		CAGL0G04631g						CAGL0G04631g	Temporally induced
	CAGL0I10098g	CAGL0H02563g	CAGL0H03905g	CAGL0H10032g	CAGL0H09130g		CAGL0G04763g						CAGL0G04763g	Temporally induced
	CAGL0I10147g	CAGL0H02585g	CAGL0H03993g	CAGL0H10054g	CAGL0H09152g		CAGL0G04807g						CAGL0G04807g	Temporally induced
	CAGL0I10200g	CAGL0H02695g	CAGL0H04037g	CAGL0H10076g	CAGL0H09328g		CAGL0G04851g						CAGL0G04851g	Temporally induced
	CAGL0I10211g	CAGL0H03487g	CAGL0H04081g	CAGL0H10142g	CAGL0H09372g		CAGL0G04895g						CAGL0G04895g	Temporally induced
	CAGL0I10246g	CAGL0H03509g	CAGL0H04191g	CAGL0H10362g	CAGL0H09592g		CAGL0G05027g						CAGL0G05027g	Temporally induced
	CAGL0I10340g	CAGL0H03553g	CAGL0H04499g	CAGL0H10626g	CAGL0H09614g		CAGL0G05071g						CAGL0G05071g	Temporally induced
	CAGL0I10362g	CAGL0H03685g	CAGL0H04521g	CAGL0I00116g	CAGL0H09658g		CAGL0G05269g						CAGL0G05269g	Temporally induced
	CAGL0I10384g	CAGL0H03729g	CAGL0H04543g	CAGL0I00352g	CAGL0H09834g		CAGL0G05291g						CAGL0G05291g	Temporally induced
	CAGL0I10406g	CAGL0H03795g	CAGL0H04565g	CAGL0I00418g	CAGL0H09856g		CAGL0G05313g						CAGL0G05313g	Temporally induced
	CAGL0I10472g	CAGL0H03839g	CAGL0H04631g	CAGL0I00484g	CAGL0H09878g		CAGL0G05329g						CAGL0G05329g	Temporally induced
	CAGL0I10494g	CAGL0H03905g	CAGL0H04653g	CAGL0I00550g	CAGL0H09944g		CAGL0G05335g						CAGL0G05335g	Temporally induced
	CAGL0I10516g	CAGL0H03993g	CAGL0H04675g	CAGL0I00572g	CAGL0H09966g		CAGL0G05544g						CAGL0G05544g	Temporally induced
	CAGL0I10648g	CAGL0H04081g	CAGL0H04741g	CAGL0I00594g	CAGL0H10010g		CAGL0G05566g						CAGL0G05566g	Temporally induced
	CAGL0I11011g	CAGL0H04191g	CAGL0H04763g	CAGL0I00726g	CAGL0H10032g		CAGL0G05764g						CAGL0G05764g	Temporally induced
	CAGL0J00165g	CAGL0H04499g	CAGL0H04939g	CAGL0I00748g	CAGL0H10054g		CAGL0G05830g						CAGL0G05830g	Temporally induced
	CAGL0J00275g	CAGL0H04521g	CAGL0H04961g	CAGL0I00792g	CAGL0H10076g		CAGL0G05874g						CAGL0G05874g	Temporally induced
	CAGL0J00715g	CAGL0H04631g	CAGL0H04983g	CAGL0I00814g	CAGL0H10142g		CAGL0G05940g						CAGL0G05940g	Temporally induced
	CAGL0J00737g	CAGL0H04653g	CAGL0H05005g	CAGL0I01100g	CAGL0H10362g		CAGL0G06006g						CAGL0G06006g	Temporally induced
	CAGL0J00825g	CAGL0H04675g	CAGL0H05401g	CAGL0I01122g	CAGL0H10626g		CAGL0G06028g						CAGL0G06028g	Temporally induced
	CAGL0J00847g	CAGL0H04741g	CAGL0H05445g	CAGL0I01144g	CAGL0I00116g		CAGL0G06050g						CAGL0G06050g	Temporally induced
	CAGL0J00935g	CAGL0H04763g	CAGL0H05489g	CAGL0I01166g	CAGL0I00352g		CAGL0G06072g						CAGL0G06072g	Temporally induced
	CAGL0J00957g	CAGL0H04939g	CAGL0H05511g	CAGL0I01342g	CAGL0I00418g		CAGL0G06094g						CAGL0G06094g	Temporally induced
	CAGL0J00968g	CAGL0H04961g	CAGL0H05643g	CAGL0I01364g	CAGL0I00484g		CAGL0G06138g						CAGL0G06138g	Temporally induced
	CAGL0J01155g	CAGL0H05137g	CAGL0H05665g	CAGL0I01386g	CAGL0I00550g		CAGL0G06248g						CAGL0G06248g	Temporally induced
	CAGL0J01177g	CAGL0H05445g	CAGL0H06105g	CAGL0I01408g	CAGL0I00572g		CAGL0G06358g						CAGL0G06358g	Temporally induced
	CAGL0J01265g	CAGL0H05489g	CAGL0H06215g	CAGL0I01430g	CAGL0I00594g		CAGL0G06380g						CAGL0G06380g	Temporally induced
	CAGL0J01287g	CAGL0H05511g	CAGL0H06369g	CAGL0I01496g	CAGL0I00726g		CAGL0G06490g						CAGL0G06490g	Temporally induced
	CAGL0J01309g	CAGL0H05643g	CAGL0H06413g	CAGL0I02178g	CAGL0I00748g		CAGL0G06732g						CAGL0G06732g	Temporally induced
	CAGL0J01331g	CAGL0H06105g	CAGL0H06435g	CAGL0I02200g	CAGL0I00792g		CAGL0G06776g						CAGL0G06776g	Temporally induced
	CAGL0J01441g	CAGL0H06127g	CAGL0H06523g	CAGL0I02486g	CAGL0I00814g		CAGL0G06798g						CAGL0G06798g	Temporally induced
	CAGL0J01595g	CAGL0H06215g	CAGL0H06545g	CAGL0I02508g	CAGL0I01078g		CAGL0G06974g						CAGL0G06974g	Temporally induced
	CAGL0J01699g	CAGL0H06369g	CAGL0H06633g	CAGL0I02574g	CAGL0I01100g		CAGL0G07106g						CAGL0G07106g	Temporally induced
	CAGL0J01848g	CAGL0H06413g	CAGL0H06677g	CAGL0I02948g	CAGL0I01122g		CAGL0G07227g						CAGL0G07227g	Temporally induced
	CAGL0J01870g	CAGL0H06435g	CAGL0H06699g	CAGL0I02970g	CAGL0I01144g		CAGL0G07249g						CAGL0G07249g	Temporally induced
	CAGL0J02354g	CAGL0H06523g	CAGL0H06732g	CAGL0I03014g	CAGL0I01166g		CAGL0G07271g						CAGL0G07271g	Temporally induced
	CAGL0J02508g	CAGL0H06545g	CAGL0H06743g	CAGL0I03234g	CAGL0I01342g		CAGL0G07315g						CAGL0G07315g	Temporally induced
	CAGL0J02530g	CAGL0H06633g	CAGL0H07007g	CAGL0I03322g	CAGL0I01364g		CAGL0G07337g						CAGL0G07337g	Temporally induced
	CAGL0J02552g	CAGL0H06677g	CAGL0H07023g	CAGL0I03366g	CAGL0I01386g		CAGL0G07425g						CAGL0G07425g	Temporally induced
	CAGL0J02882g	CAGL0H06699g	CAGL0H07469g	CAGL0I03454g	CAGL0I01408g		CAGL0G07469g						CAGL0G07469g	Temporally induced
	CAGL0J02904g	CAGL0H06732g	CAGL0H07579g	CAGL0I03476g	CAGL0I01430g		CAGL0G07491g						CAGL0G07491g	Temporally induced
	CAGL0J02926g	CAGL0H07007g	CAGL0H07997g	CAGL0I03740g	CAGL0I01496g		CAGL0G07601g						CAGL0G07601g	Temporally induced
	CAGL0J02948g	CAGL0H07023g	CAGL0H08173g	CAGL0I03762g	CAGL0I01562g		CAGL0G07623g						CAGL0G07623g	Temporally induced
	CAGL0J02992g	CAGL0H07315g	CAGL0H08283g	CAGL0I03938g	CAGL0I02178g		CAGL0G07667g						CAGL0G07667g	Temporally induced
	CAGL0J03014g	CAGL0H07579g	CAGL0H08305g	CAGL0I03960g	CAGL0I02200g		CAGL0G07821g						CAGL0G07821g	Temporally induced
	CAGL0J03058g	CAGL0H07887g	CAGL0H08327g	CAGL0I04328g	CAGL0I02486g		CAGL0G07931g						CAGL0G07931g	Temporally induced
	CAGL0J03080g	CAGL0H07997g	CAGL0H08371g	CAGL0I04356g	CAGL0I02508g		CAGL0G07953g						CAGL0G07953g	Temporally induced
	CAGL0J03102g	CAGL0H08173g	CAGL0H08393g	CAGL0I04774g	CAGL0I02574g		CAGL0G08019g						CAGL0G08019g	Temporally induced
	CAGL0J03146g	CAGL0H08327g	CAGL0H08503g	CAGL0I04994g	CAGL0I02948g		CAGL0G08041g						CAGL0G08041g	Temporally induced
	CAGL0J03212g	CAGL0H08371g	CAGL0H08525g	CAGL0I05038g	CAGL0I02970g		CAGL0G08063g						CAGL0G08063g	Temporally induced
	CAGL0J03234g	CAGL0H08393g	CAGL0H08541g	CAGL0I05098g	CAGL0I03014g		CAGL0G08151g						CAGL0G08151g	Temporally induced
	CAGL0J03608g	CAGL0H08503g	CAGL0H08547g	CAGL0I05390g	CAGL0I03190g		CAGL0G08173g						CAGL0G08173g	Temporally induced
	CAGL0J03630g	CAGL0H08525g	CAGL0H08734g	CAGL0I05522g	CAGL0I03234g		CAGL0G08195g						CAGL0G08195g	Temporally induced
	CAGL0J03850g	CAGL0H08541g	CAGL0H08844g	CAGL0I05610g	CAGL0I03322g		CAGL0G08217g						CAGL0G08217g	Temporally induced
	CAGL0J04004g	CAGL0H08547g	CAGL0H08888g	CAGL0I05874g	CAGL0I03366g		CAGL0G08228g						CAGL0G08228g	Temporally induced
	CAGL0J04048g	CAGL0H08734g	CAGL0H08976g	CAGL0I05918g	CAGL0I03454g		CAGL0G08558g						CAGL0G08558g	Temporally induced
	CAGL0J04070g	CAGL0H08888g	CAGL0H09086g	CAGL0I05934g	CAGL0I03476g		CAGL0G08624g						CAGL0G08624g	Temporally induced
	CAGL0J04158g	CAGL0H08976g	CAGL0H09130g	CAGL0I06160g	CAGL0I03740g		CAGL0G08668g						CAGL0G08668g	Temporally induced
	CAGL0J04202g	CAGL0H09086g	CAGL0H09152g	CAGL0I06182g	CAGL0I03762g		CAGL0G08712g						CAGL0G08712g	Temporally induced
	CAGL0J04400g	CAGL0H09130g	CAGL0H09196g	CAGL0I06204g	CAGL0I03938g		CAGL0G08734g						CAGL0G08734g	Temporally induced
	CAGL0J05038g	CAGL0H09152g	CAGL0H09328g	CAGL0I06402g	CAGL0I03960g		CAGL0G08954g						CAGL0G08954g	Temporally induced
	CAGL0J05060g	CAGL0H09196g	CAGL0H09548g	CAGL0I06721g	CAGL0I04246g		CAGL0G09020g						CAGL0G09020g	Temporally induced
	CAGL0J05159g	CAGL0H09328g	CAGL0H09592g	CAGL0I06743g	CAGL0I04328g		CAGL0G09064g						CAGL0G09064g	Temporally induced
	CAGL0J05247g	CAGL0H09372g	CAGL0H09614g	CAGL0I07051g	CAGL0I04356g		CAGL0G09130g						CAGL0G09130g	Temporally induced
	CAGL0J05258g	CAGL0H09592g	CAGL0H09636g	CAGL0I07139g	CAGL0I04774g		CAGL0G09262g						CAGL0G09262g	Temporally induced
	CAGL0J05280g	CAGL0H09614g	CAGL0H09658g	CAGL0I07227g	CAGL0I04994g		CAGL0G09361g						CAGL0G09361g	Temporally induced
	CAGL0J05434g	CAGL0H09834g	CAGL0H09834g	CAGL0I07447g	CAGL0I05038g		CAGL0G09383g						CAGL0G09383g	Temporally induced
	CAGL0J06050g	CAGL0H09856g	CAGL0H09856g	CAGL0I07491g	CAGL0I05098g		CAGL0G09449g						CAGL0G09449g	Temporally induced
	CAGL0J06374g	CAGL0H09878g	CAGL0H09878g	CAGL0I07837g	CAGL0I05390g		CAGL0G09515g						CAGL0G09515g	Temporally induced
	CAGL0J07238g	CAGL0H09966g	CAGL0H09944g	CAGL0I07843g	CAGL0I05522g		CAGL0G09537g						CAGL0G09537g	Temporally induced
	CAGL0J07568g	CAGL0H10010g	CAGL0H09966g	CAGL0I07865g	CAGL0I05610g		CAGL0G09581g						CAGL0G09581g	Temporally induced
	CAGL0J07612g	CAGL0H10032g	CAGL0H10010g	CAGL0I08305g	CAGL0I05874g		CAGL0G09603g						CAGL0G09603g	Temporally induced
	CAGL0J07898g	CAGL0H10054g	CAGL0H10032g	CAGL0I08327g	CAGL0I05896g		CAGL0G09669g						CAGL0G09669g	Temporally induced
	CAGL0J08162g	CAGL0H10142g	CAGL0H10054g	CAGL0I08393g	CAGL0I05918g		CAGL0G09691g						CAGL0G09691g	Temporally induced
	CAGL0J08679g	CAGL0H10362g	CAGL0H10076g	CAGL0I08503g	CAGL0I05934g		CAGL0G09713g						CAGL0G09713g	Temporally induced
	CAGL0J08712g	CAGL0H10604g	CAGL0H10202g	CAGL0I08613g	CAGL0I06160g		CAGL0G09735g						CAGL0G09735g	Temporally induced
	CAGL0J08976g	CAGL0H10626g	CAGL0H10362g	CAGL0I08635g	CAGL0I06182g		CAGL0G09955g						CAGL0G09955g	Temporally induced
	CAGL0J08998g	CAGL0I00352g	CAGL0I00352g	CAGL0I08767g	CAGL0I06204g		CAGL0G09977g						CAGL0G09977g	Temporally induced
	CAGL0J09064g	CAGL0I00418g	CAGL0I00418g	CAGL0I09240g	CAGL0I06270g		CAGL0G10153g						CAGL0G10153g	Temporally induced
	CAGL0J09086g	CAGL0I00484g	CAGL0I00484g	CAGL0I09262g	CAGL0I06402g		CAGL0G10175g						CAGL0G10175g	Temporally induced
	CAGL0J09306g	CAGL0I00550g	CAGL0I00550g	CAGL0I09284g	CAGL0I06490g		CAGL0G10219g						CAGL0G10219g	Temporally induced
	CAGL0J09328g	CAGL0I00572g	CAGL0I00572g	CAGL0I09592g	CAGL0I06721g		CAGL0H00121g						CAGL0H00121g	Temporally induced
	CAGL0J09350g	CAGL0I00594g	CAGL0I00594g	CAGL0I09746g	CAGL0I06743g		CAGL0H00132g						CAGL0H00132g	Temporally induced
	CAGL0J09372g	CAGL0I00748g	CAGL0I00726g	CAGL0I09790g	CAGL0I07051g		CAGL0H00418g						CAGL0H00418g	Temporally induced
	CAGL0J09592g	CAGL0I00792g	CAGL0I00748g	CAGL0I09856g	CAGL0I07139g		CAGL0H00462g						CAGL0H00462g	Temporally induced
	CAGL0J09614g	CAGL0I00814g	CAGL0I00792g	CAGL0I09878g	CAGL0I07227g		CAGL0H00506g						CAGL0H00506g	Temporally induced
	CAGL0J09680g	CAGL0I01078g	CAGL0I00814g	CAGL0I10147g	CAGL0I07447g		CAGL0H00572g						CAGL0H00572g	Temporally induced
	CAGL0J09724g	CAGL0I01100g	CAGL0I01078g	CAGL0I10246g	CAGL0I07491g		CAGL0H00704g						CAGL0H00704g	Temporally induced
	CAGL0J09812g	CAGL0I01122g	CAGL0I01100g	CAGL0I10340g	CAGL0I07821g		CAGL0H00913g						CAGL0H00913g	Temporally induced
	CAGL0J09900g	CAGL0I01144g	CAGL0I01122g	CAGL0I10362g	CAGL0I07837g		CAGL0H00935g						CAGL0H00935g	Temporally induced
	CAGL0J09922g	CAGL0I01166g	CAGL0I01144g	CAGL0I10384g	CAGL0I07843g		CAGL0H00957g						CAGL0H00957g	Temporally induced
	CAGL0J09944g	CAGL0I01342g	CAGL0I01166g	CAGL0I10472g	CAGL0I07865g		CAGL0H01287g						CAGL0H01287g	Temporally induced
	CAGL0J09966g	CAGL0I01364g	CAGL0I01342g	CAGL0I10494g	CAGL0I08305g		CAGL0H01353g						CAGL0H01353g	Temporally induced
	CAGL0J10076g	CAGL0I01386g	CAGL0I01364g	CAGL0I10516g	CAGL0I08327g		CAGL0H01375g						CAGL0H01375g	Temporally induced
	CAGL0J10098g	CAGL0I01408g	CAGL0I01386g	CAGL0I10538g	CAGL0I08393g		CAGL0H01397g						CAGL0H01397g	Temporally induced
	CAGL0J10164g	CAGL0I01430g	CAGL0I01408g	CAGL0I10648g	CAGL0I08503g		CAGL0H01529g						CAGL0H01529g	Temporally induced
	CAGL0J10186g	CAGL0I01496g	CAGL0I01430g	CAGL0I10747g	CAGL0I08613g		CAGL0H01606g						CAGL0H01606g	Temporally induced
	CAGL0J10318g	CAGL0I01562g	CAGL0I01496g	CAGL0I10967g	CAGL0I08635g		CAGL0H01705g						CAGL0H01705g	Temporally induced
	CAGL0J10384g	CAGL0I02178g	CAGL0I01562g	CAGL0J00165g	CAGL0I08767g		CAGL0H01837g						CAGL0H01837g	Temporally induced
	CAGL0J10494g	CAGL0I02200g	CAGL0I02134g	CAGL0J00253g	CAGL0I09240g		CAGL0H01859g						CAGL0H01859g	Temporally induced
	CAGL0J11132g	CAGL0I02442g	CAGL0I02178g	CAGL0J00451g	CAGL0I09262g		CAGL0H01881g						CAGL0H01881g	Temporally induced
	CAGL0J11220g	CAGL0I02486g	CAGL0I02200g	CAGL0J00473g	CAGL0I09284g		CAGL0H01947g						CAGL0H01947g	Temporally induced
	CAGL0J11462g	CAGL0I02508g	CAGL0I02442g	CAGL0J00737g	CAGL0I09592g		CAGL0H02035g						CAGL0H02035g	Temporally induced
	CAGL0J11550g	CAGL0I02926g	CAGL0I02486g	CAGL0J00803g	CAGL0I09746g		CAGL0H02057g						CAGL0H02057g	Temporally induced
	CAGL0J11682g	CAGL0I02948g	CAGL0I02508g	CAGL0J00825g	CAGL0I09790g		CAGL0H02101g						CAGL0H02101g	Temporally induced
	CAGL0J11990g	CAGL0I02970g	CAGL0I02574g	CAGL0J00847g	CAGL0I09856g		CAGL0H02123g						CAGL0H02123g	Temporally induced
	CAGL0J12034g	CAGL0I03014g	CAGL0I02948g	CAGL0J00869g	CAGL0I09878g		CAGL0H02365g						CAGL0H02365g	Temporally induced
	CAGL0K00110g	CAGL0I03190g	CAGL0I02970g	CAGL0J00935g	CAGL0I10147g		CAGL0H02387g						CAGL0H02387g	Temporally induced
	CAGL0K00170g	CAGL0I03234g	CAGL0I03014g	CAGL0J00957g	CAGL0I10246g		CAGL0H02409g						CAGL0H02409g	Temporally induced
	CAGL0K00671g	CAGL0I03322g	CAGL0I03190g	CAGL0J01155g	CAGL0I10340g		CAGL0H02491g						CAGL0H02491g	Temporally induced
	CAGL0K00781g	CAGL0I03366g	CAGL0I03234g	CAGL0J01177g	CAGL0I10362g		CAGL0H02541g						CAGL0H02541g	Temporally induced
	CAGL0K00803g	CAGL0I03432g	CAGL0I03322g	CAGL0J01265g	CAGL0I10384g		CAGL0H02563g						CAGL0H02563g	Temporally induced
	CAGL0K00935g	CAGL0I03454g	CAGL0I03366g	CAGL0J01287g	CAGL0I10472g		CAGL0H02585g						CAGL0H02585g	Temporally induced
	CAGL0K01133g	CAGL0I03476g	CAGL0I03432g	CAGL0J01331g	CAGL0I10494g		CAGL0H02695g						CAGL0H02695g	Temporally induced
	CAGL0K01155g	CAGL0I03498g	CAGL0I03454g	CAGL0J01353g	CAGL0I10516g		CAGL0H03487g						CAGL0H03487g	Temporally induced
	CAGL0K01177g	CAGL0I03740g	CAGL0I03476g	CAGL0J01441g	CAGL0I10538g		CAGL0H03509g						CAGL0H03509g	Temporally induced
	CAGL0K01199g	CAGL0I03762g	CAGL0I03740g	CAGL0J01595g	CAGL0I10648g		CAGL0H03531g						CAGL0H03531g	Temporally induced
	CAGL0K01243g	CAGL0I03828g	CAGL0I03762g	CAGL0J01699g	CAGL0I10747g		CAGL0H03553g						CAGL0H03553g	Temporally induced
	CAGL0K01287g	CAGL0I03938g	CAGL0I03938g	CAGL0J01848g	CAGL0J00165g		CAGL0H03685g						CAGL0H03685g	Temporally induced
	CAGL0K01309g	CAGL0I03960g	CAGL0I03960g	CAGL0J02266g	CAGL0J00253g		CAGL0H03707g						CAGL0H03707g	Temporally induced
	CAGL0K01331g	CAGL0I04026g	CAGL0I04356g	CAGL0J02354g	CAGL0J00429g		CAGL0H03729g						CAGL0H03729g	Temporally induced
	CAGL0K01353g	CAGL0I04356g	CAGL0I04510g	CAGL0J02508g	CAGL0J00451g		CAGL0H03795g						CAGL0H03795g	Temporally induced
	CAGL0K01375g	CAGL0I04444g	CAGL0I04774g	CAGL0J02530g	CAGL0J00473g		CAGL0H03839g						CAGL0H03839g	Temporally induced
	CAGL0K01661g	CAGL0I04686g	CAGL0I04796g	CAGL0J02684g	CAGL0J00737g		CAGL0H03905g						CAGL0H03905g	Temporally induced
	CAGL0K01683g	CAGL0I04774g	CAGL0I04994g	CAGL0J02794g	CAGL0J00825g		CAGL0H03993g						CAGL0H03993g	Temporally induced
	CAGL0K01727g	CAGL0I04796g	CAGL0I05038g	CAGL0J02882g	CAGL0J00847g		CAGL0H04037g						CAGL0H04037g	Temporally induced
	CAGL0K01859g	CAGL0I04994g	CAGL0I05098g	CAGL0J02904g	CAGL0J00869g		CAGL0H04081g						CAGL0H04081g	Temporally induced
	CAGL0K02123g	CAGL0I05038g	CAGL0I05236g	CAGL0J02926g	CAGL0J00935g		CAGL0H04191g						CAGL0H04191g	Temporally induced
	CAGL0K02145g	CAGL0I05236g	CAGL0I05390g	CAGL0J02948g	CAGL0J00957g		CAGL0H04257g						CAGL0H04257g	Temporally induced
	CAGL0K02255g	CAGL0I05390g	CAGL0I05522g	CAGL0J03014g	CAGL0J01155g		CAGL0H04279g						CAGL0H04279g	Temporally induced
	CAGL0K02277g	CAGL0I05610g	CAGL0I05610g	CAGL0J03058g	CAGL0J01177g		CAGL0H04499g						CAGL0H04499g	Temporally induced
	CAGL0K02321g	CAGL0I05874g	CAGL0I05874g	CAGL0J03080g	CAGL0J01265g		CAGL0H04521g						CAGL0H04521g	Temporally induced
	CAGL0K02497g	CAGL0I05896g	CAGL0I05896g	CAGL0J03102g	CAGL0J01287g		CAGL0H04543g						CAGL0H04543g	Temporally induced
	CAGL0K02519g	CAGL0I05918g	CAGL0I05918g	CAGL0J03146g	CAGL0J01331g		CAGL0H04565g						CAGL0H04565g	Temporally induced
	CAGL0K02541g	CAGL0I05934g	CAGL0I05934g	CAGL0J03212g	CAGL0J01353g		CAGL0H04631g						CAGL0H04631g	Temporally induced
	CAGL0K03069g	CAGL0I06050g	CAGL0I06160g	CAGL0J03234g	CAGL0J01441g		CAGL0H04653g						CAGL0H04653g	Temporally induced
	CAGL0K03135g	CAGL0I06160g	CAGL0I06182g	CAGL0J03256g	CAGL0J01595g		CAGL0H04675g						CAGL0H04675g	Temporally induced
	CAGL0K03443g	CAGL0I06182g	CAGL0I06204g	CAGL0J03498g	CAGL0J01699g		CAGL0H04691g						CAGL0H04691g	Temporally induced
	CAGL0K03459g	CAGL0I06204g	CAGL0I06270g	CAGL0J03630g	CAGL0J01848g		CAGL0H04741g						CAGL0H04741g	Temporally induced
	CAGL0K03465g	CAGL0I06270g	CAGL0I06402g	CAGL0J03916g	CAGL0J02266g		CAGL0H04763g						CAGL0H04763g	Temporally induced
	CAGL0K03663g	CAGL0I06380g	CAGL0I06721g	CAGL0J03960g	CAGL0J02354g		CAGL0H04939g						CAGL0H04939g	Temporally induced
	CAGL0K04147g	CAGL0I06402g	CAGL0I06743g	CAGL0J04048g	CAGL0J02508g		CAGL0H04961g						CAGL0H04961g	Temporally induced
	CAGL0K04235g	CAGL0I06721g	CAGL0I07051g	CAGL0J04070g	CAGL0J02530g		CAGL0H04983g						CAGL0H04983g	Temporally induced
	CAGL0K04257g	CAGL0I06743g	CAGL0I07139g	CAGL0J04202g	CAGL0J02794g		CAGL0H05005g						CAGL0H05005g	Temporally induced
	CAGL0K04477g	CAGL0I07051g	CAGL0I07227g	CAGL0J04224g	CAGL0J02882g		CAGL0H05137g						CAGL0H05137g	Temporally induced
	CAGL0K04499g	CAGL0I07139g	CAGL0I07447g	CAGL0J04268g	CAGL0J02904g		CAGL0H05401g						CAGL0H05401g	Temporally induced
	CAGL0K04587g	CAGL0I07227g	CAGL0I07491g	CAGL0J04554g	CAGL0J02926g		CAGL0H05445g						CAGL0H05445g	Temporally induced
	CAGL0K04741g	CAGL0I07447g	CAGL0I07557g	CAGL0J05038g	CAGL0J02948g		CAGL0H05489g						CAGL0H05489g	Temporally induced
	CAGL0K05027g	CAGL0I07491g	CAGL0I07821g	CAGL0J05060g	CAGL0J03014g		CAGL0H05511g						CAGL0H05511g	Temporally induced
	CAGL0K05093g	CAGL0I07689g	CAGL0I07837g	CAGL0J05159g	CAGL0J03058g		CAGL0H05643g						CAGL0H05643g	Temporally induced
	CAGL0K05357g	CAGL0I07821g	CAGL0I07843g	CAGL0J05247g	CAGL0J03080g		CAGL0H05665g						CAGL0H05665g	Temporally induced
	CAGL0K05390g	CAGL0I07837g	CAGL0I07865g	CAGL0J05258g	CAGL0J03102g		CAGL0H06105g						CAGL0H06105g	Temporally induced
	CAGL0K05401g	CAGL0I07843g	CAGL0I08305g	CAGL0J05390g	CAGL0J03146g		CAGL0H06127g						CAGL0H06127g	Temporally induced
	CAGL0K05423g	CAGL0I07865g	CAGL0I08327g	CAGL0J05412g	CAGL0J03212g		CAGL0H06215g						CAGL0H06215g	Temporally induced
	CAGL0K05643g	CAGL0I08305g	CAGL0I08393g	CAGL0J05434g	CAGL0J03234g		CAGL0H06369g						CAGL0H06369g	Temporally induced
	CAGL0K05753g	CAGL0I08327g	CAGL0I08459g	CAGL0J06006g	CAGL0J03256g		CAGL0H06413g						CAGL0H06413g	Temporally induced
	CAGL0K05995g	CAGL0I08393g	CAGL0I08503g	CAGL0J06050g	CAGL0J03498g		CAGL0H06435g						CAGL0H06435g	Temporally induced
	CAGL0K06061g	CAGL0I08459g	CAGL0I08525g	CAGL0J06374g	CAGL0J03630g		CAGL0H06523g						CAGL0H06523g	Temporally induced
	CAGL0K06149g	CAGL0I08503g	CAGL0I08613g	CAGL0J06380g	CAGL0J03850g		CAGL0H06545g						CAGL0H06545g	Temporally induced
	CAGL0K06259g	CAGL0I08525g	CAGL0I08635g	CAGL0J07238g	CAGL0J03916g		CAGL0H06633g						CAGL0H06633g	Temporally induced
	CAGL0K06281g	CAGL0I08613g	CAGL0I08767g	CAGL0J07568g	CAGL0J04070g		CAGL0H06677g						CAGL0H06677g	Temporally induced
	CAGL0K06567g	CAGL0I08635g	CAGL0I08965g	CAGL0J07612g	CAGL0J04158g		CAGL0H06699g						CAGL0H06699g	Temporally induced
	CAGL0K06633g	CAGL0I08767g	CAGL0I09240g	CAGL0J07678g	CAGL0J04202g		CAGL0H06732g						CAGL0H06732g	Temporally induced
	CAGL0K06655g	CAGL0I08965g	CAGL0I09262g	CAGL0J07898g	CAGL0J04224g		CAGL0H06743g						CAGL0H06743g	Temporally induced
	CAGL0K07183g	CAGL0I09240g	CAGL0I09592g	CAGL0J07980g	CAGL0J04268g		CAGL0H06787g						CAGL0H06787g	Temporally induced
	CAGL0K07293g	CAGL0I09262g	CAGL0I09746g	CAGL0J08162g	CAGL0J04554g		CAGL0H07007g						CAGL0H07007g	Temporally induced
	CAGL0K07414g	CAGL0I09284g	CAGL0I09790g	CAGL0J08184g	CAGL0J05038g		CAGL0H07023g						CAGL0H07023g	Temporally induced
	CAGL0K07832g	CAGL0I09592g	CAGL0I09856g	CAGL0J08679g	CAGL0J05060g		CAGL0H07315g						CAGL0H07315g	Temporally induced
	CAGL0K07854g	CAGL0I09746g	CAGL0I09878g	CAGL0J08976g	CAGL0J05159g		CAGL0H07469g						CAGL0H07469g	Temporally induced
	CAGL0K08382g	CAGL0I09790g	CAGL0I10054g	CAGL0J08998g	CAGL0J05247g		CAGL0H07579g						CAGL0H07579g	Temporally induced
	CAGL0K08624g	CAGL0I09856g	CAGL0I10147g	CAGL0J09064g	CAGL0J05258g		CAGL0H07887g						CAGL0H07887g	Temporally induced
	CAGL0K08712g	CAGL0I09878g	CAGL0I10340g	CAGL0J09086g	CAGL0J05280g		CAGL0H07997g						CAGL0H07997g	Temporally induced
	CAGL0K08734g	CAGL0I10147g	CAGL0I10362g	CAGL0J09196g	CAGL0J05390g		CAGL0H08173g						CAGL0H08173g	Temporally induced
	CAGL0K08756g	CAGL0I10340g	CAGL0I10384g	CAGL0J09240g	CAGL0J05434g		CAGL0H08195g						CAGL0H08195g	Temporally induced
	CAGL0K09900g	CAGL0I10362g	CAGL0I10406g	CAGL0J09328g	CAGL0J06050g		CAGL0H08283g						CAGL0H08283g	Temporally induced
	CAGL0K09922g	CAGL0I10384g	CAGL0I10472g	CAGL0J09350g	CAGL0J06374g		CAGL0H08305g						CAGL0H08305g	Temporally induced
	CAGL0K09966g	CAGL0I10472g	CAGL0I10494g	CAGL0J09372g	CAGL0J07238g		CAGL0H08327g						CAGL0H08327g	Temporally induced
	CAGL0K10164g	CAGL0I10494g	CAGL0I10516g	CAGL0J09614g	CAGL0J07568g		CAGL0H08371g						CAGL0H08371g	Temporally induced
	CAGL0K10604g	CAGL0I10516g	CAGL0I10538g	CAGL0J09680g	CAGL0J07590g		CAGL0H08393g						CAGL0H08393g	Temporally induced
	CAGL0K10824g	CAGL0I10538g	CAGL0I10648g	CAGL0J09702g	CAGL0J07612g		CAGL0H08503g						CAGL0H08503g	Temporally induced
	CAGL0K10868g	CAGL0I10648g	CAGL0I10747g	CAGL0J09724g	CAGL0J07678g		CAGL0H08525g						CAGL0H08525g	Temporally induced
	CAGL0K10906g	CAGL0I10747g	CAGL0J00165g	CAGL0J09812g	CAGL0J07980g		CAGL0H08541g						CAGL0H08541g	Temporally induced
	CAGL0K10956g	CAGL0I10967g	CAGL0J00253g	CAGL0J09900g	CAGL0J08162g		CAGL0H08547g						CAGL0H08547g	Temporally induced
	CAGL0K11044g	CAGL0J00165g	CAGL0J00429g	CAGL0J09922g	CAGL0J08316g		CAGL0H08734g						CAGL0H08734g	Temporally induced
	CAGL0K11231g	CAGL0J00429g	CAGL0J00451g	CAGL0J09944g	CAGL0J08679g		CAGL0H08844g						CAGL0H08844g	Temporally induced
	CAGL0K11418g	CAGL0J00451g	CAGL0J00737g	CAGL0J09966g	CAGL0J08976g		CAGL0H08866g						CAGL0H08866g	Temporally induced
	CAGL0K11440g	CAGL0J00737g	CAGL0J00803g	CAGL0J10098g	CAGL0J08998g		CAGL0H08888g						CAGL0H08888g	Temporally induced
	CAGL0K11462g	CAGL0J00825g	CAGL0J00825g	CAGL0J10164g	CAGL0J09064g		CAGL0H08976g						CAGL0H08976g	Temporally induced
	CAGL0K11572g	CAGL0J00847g	CAGL0J00847g	CAGL0J10318g	CAGL0J09086g		CAGL0H09086g						CAGL0H09086g	Temporally induced
	CAGL0K11594g	CAGL0J00869g	CAGL0J00869g	CAGL0J10384g	CAGL0J09196g		CAGL0H09130g						CAGL0H09130g	Temporally induced
	CAGL0K11660g	CAGL0J00891g	CAGL0J00935g	CAGL0J10802g	CAGL0J09240g		CAGL0H09152g						CAGL0H09152g	Temporally induced
	CAGL0K11682g	CAGL0J00935g	CAGL0J00957g	CAGL0J10846g	CAGL0J09350g		CAGL0H09196g						CAGL0H09196g	Temporally induced
	CAGL0K11726g	CAGL0J00957g	CAGL0J01155g	CAGL0J11220g	CAGL0J09372g		CAGL0H09328g						CAGL0H09328g	Temporally induced
	CAGL0K11748g	CAGL0J01155g	CAGL0J01177g	CAGL0J11242g	CAGL0J09614g		CAGL0H09372g						CAGL0H09372g	Temporally induced
	CAGL0K11858g	CAGL0J01177g	CAGL0J01265g	CAGL0J11462g	CAGL0J09680g		CAGL0H09548g						CAGL0H09548g	Temporally induced
	CAGL0K11880g	CAGL0J01265g	CAGL0J01287g	CAGL0J11484g	CAGL0J09724g		CAGL0H09592g						CAGL0H09592g	Temporally induced
	CAGL0K12012g	CAGL0J01287g	CAGL0J01331g	CAGL0J11550g	CAGL0J09812g		CAGL0H09614g						CAGL0H09614g	Temporally induced
	CAGL0K12034g	CAGL0J01309g	CAGL0J01353g	CAGL0J11682g	CAGL0J09900g		CAGL0H09636g						CAGL0H09636g	Temporally induced
	CAGL0K12694g	CAGL0J01331g	CAGL0J01441g	CAGL0J11748g	CAGL0J09922g		CAGL0H09658g						CAGL0H09658g	Temporally induced
	CAGL0K12826g	CAGL0J01441g	CAGL0J01595g	CAGL0J11770g	CAGL0J09944g		CAGL0H09834g						CAGL0H09834g	Temporally induced
	CAGL0L00157g	CAGL0J01595g	CAGL0J01699g	CAGL0J11990g	CAGL0J09966g		CAGL0H09856g						CAGL0H09856g	Temporally induced
	CAGL0L00649g	CAGL0J01699g	CAGL0J02266g	CAGL0J12034g	CAGL0J10098g		CAGL0H09878g						CAGL0H09878g	Temporally induced
	CAGL0L00759g	CAGL0J01848g	CAGL0J02354g	CAGL0K00671g	CAGL0J10164g		CAGL0H09944g						CAGL0H09944g	Temporally induced
	CAGL0L01309g	CAGL0J02266g	CAGL0J02508g	CAGL0K00781g	CAGL0J10318g		CAGL0H09966g						CAGL0H09966g	Temporally induced
	CAGL0L01331g	CAGL0J02354g	CAGL0J02530g	CAGL0K00803g	CAGL0J10384g		CAGL0H10010g						CAGL0H10010g	Temporally induced
	CAGL0L01353g	CAGL0J02508g	CAGL0J02684g	CAGL0K01067g	CAGL0J10846g		CAGL0H10032g						CAGL0H10032g	Temporally induced
	CAGL0L01727g	CAGL0J02530g	CAGL0J02794g	CAGL0K01133g	CAGL0J11132g		CAGL0H10054g						CAGL0H10054g	Temporally induced
	CAGL0L01925g	CAGL0J02794g	CAGL0J02882g	CAGL0K01155g	CAGL0J11220g		CAGL0H10076g						CAGL0H10076g	Temporally induced
	CAGL0L02013g	CAGL0J02882g	CAGL0J02904g	CAGL0K01177g	CAGL0J11242g		CAGL0H10142g						CAGL0H10142g	Temporally induced
	CAGL0L02211g	CAGL0J02904g	CAGL0J02926g	CAGL0K01199g	CAGL0J11462g		CAGL0H10202g						CAGL0H10202g	Temporally induced
	CAGL0L02299g	CAGL0J02926g	CAGL0J02948g	CAGL0K01287g	CAGL0J11550g		CAGL0H10362g						CAGL0H10362g	Temporally induced
	CAGL0L02321g	CAGL0J02948g	CAGL0J02992g	CAGL0K01331g	CAGL0J11682g		CAGL0H10604g						CAGL0H10604g	Temporally induced
	CAGL0L02475g	CAGL0J02992g	CAGL0J03014g	CAGL0K01727g	CAGL0J11748g		CAGL0H10626g						CAGL0H10626g	Temporally induced
	CAGL0L02497g	CAGL0J03014g	CAGL0J03058g	CAGL0K01859g	CAGL0J11770g		CAGL0I00105g						CAGL0I00105g	Temporally induced
	CAGL0L02915g	CAGL0J03058g	CAGL0J03080g	CAGL0K01969g	CAGL0J11836g		CAGL0I00110g						CAGL0I00110g	Temporally induced
	CAGL0L02937g	CAGL0J03080g	CAGL0J03102g	CAGL0K02079g	CAGL0J11990g		CAGL0I00116g						CAGL0I00116g	Temporally induced
	CAGL0L03157g	CAGL0J03102g	CAGL0J03146g	CAGL0K02123g	CAGL0J12034g		CAGL0I00352g						CAGL0I00352g	Temporally induced
	CAGL0L03267g	CAGL0J03146g	CAGL0J03212g	CAGL0K02145g	CAGL0K00671g		CAGL0I00418g						CAGL0I00418g	Temporally induced
	CAGL0L03289g	CAGL0J03212g	CAGL0J03234g	CAGL0K02255g	CAGL0K00781g		CAGL0I00484g						CAGL0I00484g	Temporally induced
	CAGL0L03311g	CAGL0J03234g	CAGL0J03256g	CAGL0K02321g	CAGL0K00803g		CAGL0I00550g						CAGL0I00550g	Temporally induced
	CAGL0L03630g	CAGL0J03256g	CAGL0J03498g	CAGL0K02497g	CAGL0K00935g		CAGL0I00572g						CAGL0I00572g	Temporally induced
	CAGL0L03846g	CAGL0J03498g	CAGL0J03608g	CAGL0K02519g	CAGL0K01067g		CAGL0I00594g						CAGL0I00594g	Temporally induced
	CAGL0L04312g	CAGL0J03608g	CAGL0J03630g	CAGL0K02541g	CAGL0K01133g		CAGL0I00726g						CAGL0I00726g	Temporally induced
	CAGL0L04378g	CAGL0J03630g	CAGL0J03850g	CAGL0K03069g	CAGL0K01155g		CAGL0I00748g						CAGL0I00748g	Temporally induced
	CAGL0L04510g	CAGL0J03652g	CAGL0J03916g	CAGL0K03135g	CAGL0K01177g		CAGL0I00792g						CAGL0I00792g	Temporally induced
	CAGL0L04598g	CAGL0J03850g	CAGL0J04048g	CAGL0K03421g	CAGL0K01243g		CAGL0I00814g						CAGL0I00814g	Temporally induced
	CAGL0L04664g	CAGL0J04048g	CAGL0J04070g	CAGL0K03459g	CAGL0K01287g		CAGL0I01078g						CAGL0I01078g	Temporally induced
	CAGL0L04796g	CAGL0J04070g	CAGL0J04158g	CAGL0K03465g	CAGL0K01331g		CAGL0I01100g						CAGL0I01100g	Temporally induced
	CAGL0L04840g	CAGL0J04114g	CAGL0J04202g	CAGL0K03553g	CAGL0K01683g		CAGL0I01122g						CAGL0I01122g	Temporally induced
	CAGL0L05148g	CAGL0J04158g	CAGL0J04224g	CAGL0K03663g	CAGL0K01727g		CAGL0I01144g						CAGL0I01144g	Temporally induced
	CAGL0L05170g	CAGL0J04202g	CAGL0J04268g	CAGL0K03685g	CAGL0K01859g		CAGL0I01166g						CAGL0I01166g	Temporally induced
	CAGL0L05236g	CAGL0J04224g	CAGL0J04554g	CAGL0K04125g	CAGL0K01947g		CAGL0I01342g						CAGL0I01342g	Temporally induced
	CAGL0L05258g	CAGL0J04268g	CAGL0J05038g	CAGL0K04147g	CAGL0K01969g		CAGL0I01364g						CAGL0I01364g	Temporally induced
	CAGL0L05412g	CAGL0J05038g	CAGL0J05060g	CAGL0K04235g	CAGL0K02035g		CAGL0I01386g						CAGL0I01386g	Temporally induced
	CAGL0L05434g	CAGL0J05060g	CAGL0J05159g	CAGL0K04257g	CAGL0K02079g		CAGL0I01408g						CAGL0I01408g	Temporally induced
	CAGL0L05500g	CAGL0J05159g	CAGL0J05247g	CAGL0K04301g	CAGL0K02123g		CAGL0I01430g						CAGL0I01430g	Temporally induced
	CAGL0L05676g	CAGL0J05247g	CAGL0J05258g	CAGL0K04367g	CAGL0K02145g		CAGL0I01496g						CAGL0I01496g	Temporally induced
	CAGL0L06160g	CAGL0J05258g	CAGL0J05280g	CAGL0K04477g	CAGL0K02255g		CAGL0I01562g						CAGL0I01562g	Temporally induced
	CAGL0L06204g	CAGL0J05280g	CAGL0J05390g	CAGL0K04587g	CAGL0K02497g		CAGL0I02134g						CAGL0I02134g	Temporally induced
	CAGL0L06248g	CAGL0J05390g	CAGL0J05434g	CAGL0K04741g	CAGL0K02519g		CAGL0I02178g						CAGL0I02178g	Temporally induced
	CAGL0L06270g	CAGL0J05434g	CAGL0J06050g	CAGL0K05027g	CAGL0K02541g		CAGL0I02200g						CAGL0I02200g	Temporally induced
	CAGL0L06424g	CAGL0J06050g	CAGL0J06374g	CAGL0K05071g	CAGL0K03069g		CAGL0I02442g						CAGL0I02442g	Temporally induced
	CAGL0L06666g	CAGL0J06204g	CAGL0J06380g	CAGL0K05093g	CAGL0K03135g		CAGL0I02486g						CAGL0I02486g	Temporally induced
	CAGL0L06754g	CAGL0J06374g	CAGL0J06600g	CAGL0K05137g	CAGL0K03421g		CAGL0I02508g						CAGL0I02508g	Temporally induced
	CAGL0L06798g	CAGL0J06380g	CAGL0J07238g	CAGL0K05357g	CAGL0K03443g		CAGL0I02574g						CAGL0I02574g	Temporally induced
	CAGL0L06820g	CAGL0J06402g	CAGL0J07568g	CAGL0K05390g	CAGL0K03459g		CAGL0I02926g						CAGL0I02926g	Temporally induced
	CAGL0L06886g	CAGL0J06600g	CAGL0J07612g	CAGL0K05401g	CAGL0K03465g		CAGL0I02948g						CAGL0I02948g	Temporally induced
	CAGL0L06908g	CAGL0J07238g	CAGL0J07678g	CAGL0K05753g	CAGL0K03663g		CAGL0I02970g						CAGL0I02970g	Temporally induced
	CAGL0L06952g	CAGL0J07568g	CAGL0J07898g	CAGL0K05813g	CAGL0K03685g		CAGL0I03014g						CAGL0I03014g	Temporally induced
	CAGL0L07436g	CAGL0J07612g	CAGL0J07980g	CAGL0K05973g	CAGL0K04125g		CAGL0I03190g						CAGL0I03190g	Temporally induced
	CAGL0L07502g	CAGL0J07678g	CAGL0J08162g	CAGL0K05995g	CAGL0K04147g		CAGL0I03234g						CAGL0I03234g	Temporally induced
	CAGL0L07722g	CAGL0J07898g	CAGL0J08184g	CAGL0K06061g	CAGL0K04235g		CAGL0I03322g						CAGL0I03322g	Temporally induced
	CAGL0L08008g	CAGL0J07980g	CAGL0J08294g	CAGL0K06149g	CAGL0K04257g		CAGL0I03366g						CAGL0I03366g	Temporally induced
	CAGL0L08110g	CAGL0J08162g	CAGL0J08316g	CAGL0K06259g	CAGL0K04301g		CAGL0I03432g						CAGL0I03432g	Temporally induced
	CAGL0L08114g	CAGL0J08184g	CAGL0J08657g	CAGL0K06567g	CAGL0K04477g		CAGL0I03454g						CAGL0I03454g	Temporally induced
	CAGL0L08118g	CAGL0J08294g	CAGL0J08679g	CAGL0K07007g	CAGL0K04587g		CAGL0I03476g						CAGL0I03476g	Temporally induced
	CAGL0L08426g	CAGL0J08316g	CAGL0J08976g	CAGL0K07183g	CAGL0K04741g		CAGL0I03498g						CAGL0I03498g	Temporally induced
	CAGL0L08448g	CAGL0J08679g	CAGL0J08998g	CAGL0K07205g	CAGL0K05027g		CAGL0I03740g						CAGL0I03740g	Temporally induced
	CAGL0L08481g	CAGL0J08976g	CAGL0J09064g	CAGL0K07293g	CAGL0K05071g		CAGL0I03762g						CAGL0I03762g	Temporally induced
	CAGL0L08712g	CAGL0J08998g	CAGL0J09086g	CAGL0K07392g	CAGL0K05093g		CAGL0I03828g						CAGL0I03828g	Temporally induced
	CAGL0L08932g	CAGL0J09064g	CAGL0J09196g	CAGL0K07414g	CAGL0K05137g		CAGL0I03938g						CAGL0I03938g	Temporally induced
	CAGL0L09108g	CAGL0J09086g	CAGL0J09240g	CAGL0K07480g	CAGL0K05357g		CAGL0I03960g						CAGL0I03960g	Temporally induced
	CAGL0L09251g	CAGL0J09240g	CAGL0J09262g	CAGL0K07524g	CAGL0K05390g		CAGL0I04026g						CAGL0I04026g	Temporally induced
	CAGL0L09625g	CAGL0J09328g	CAGL0J09328g	CAGL0K07634g	CAGL0K05401g		CAGL0I04246g						CAGL0I04246g	Temporally induced
	CAGL0L09713g	CAGL0J09350g	CAGL0J09350g	CAGL0K07832g	CAGL0K05753g		CAGL0I04328g						CAGL0I04328g	Temporally induced
	CAGL0L09801g	CAGL0J09372g	CAGL0J09372g	CAGL0K08382g	CAGL0K05813g		CAGL0I04356g						CAGL0I04356g	Temporally induced
	CAGL0L09911g	CAGL0J09592g	CAGL0J09592g	CAGL0K08624g	CAGL0K05973g		CAGL0I04444g						CAGL0I04444g	Temporally induced
	CAGL0L09933g	CAGL0J09614g	CAGL0J09614g	CAGL0K08690g	CAGL0K05995g		CAGL0I04510g						CAGL0I04510g	Temporally induced
	CAGL0L10092g	CAGL0J09680g	CAGL0J09680g	CAGL0K08734g	CAGL0K06061g		CAGL0I04686g						CAGL0I04686g	Temporally induced
	CAGL0L10186g	CAGL0J09702g	CAGL0J09724g	CAGL0K08756g	CAGL0K06149g		CAGL0I04774g						CAGL0I04774g	Temporally induced
	CAGL0L10208g	CAGL0J09724g	CAGL0J09812g	CAGL0K08844g	CAGL0K06259g		CAGL0I04796g						CAGL0I04796g	Temporally induced
	CAGL0L10406g	CAGL0J09812g	CAGL0J09900g	CAGL0K09130g	CAGL0K06380g		CAGL0I04994g						CAGL0I04994g	Temporally induced
	CAGL0L10560g	CAGL0J09900g	CAGL0J09922g	CAGL0K09724g	CAGL0K06567g		CAGL0I05038g						CAGL0I05038g	Temporally induced
	CAGL0L10758g	CAGL0J09922g	CAGL0J09966g	CAGL0K09900g	CAGL0K07007g		CAGL0I05098g						CAGL0I05098g	Temporally induced
	CAGL0L10780g	CAGL0J09944g	CAGL0J10098g	CAGL0K09922g	CAGL0K07183g		CAGL0I05236g						CAGL0I05236g	Temporally induced
	CAGL0L10978g	CAGL0J09966g	CAGL0J10164g	CAGL0K09966g	CAGL0K07205g		CAGL0I05390g						CAGL0I05390g	Temporally induced
	CAGL0L11132g	CAGL0J10098g	CAGL0J10186g	CAGL0K10164g	CAGL0K07293g		CAGL0I05522g						CAGL0I05522g	Temporally induced
	CAGL0L11462g	CAGL0J10164g	CAGL0J10318g	CAGL0K10274g	CAGL0K07392g		CAGL0I05610g						CAGL0I05610g	Temporally induced
	CAGL0L11484g	CAGL0J10318g	CAGL0J10384g	CAGL0K10780g	CAGL0K07414g		CAGL0I05874g						CAGL0I05874g	Temporally induced
	CAGL0L11792g	CAGL0J10384g	CAGL0J11132g	CAGL0K10868g	CAGL0K07524g		CAGL0I05896g						CAGL0I05896g	Temporally induced
	CAGL0L12056g	CAGL0J10846g	CAGL0J11220g	CAGL0K10906g	CAGL0K07634g		CAGL0I05918g						CAGL0I05918g	Temporally induced
	CAGL0L12078g	CAGL0J11132g	CAGL0J11462g	CAGL0K10956g	CAGL0K07832g		CAGL0I05934g						CAGL0I05934g	Temporally induced
	CAGL0L12254g	CAGL0J11220g	CAGL0J11550g	CAGL0K10978g	CAGL0K08382g		CAGL0I06050g						CAGL0I06050g	Temporally induced
	CAGL0L12298g	CAGL0J11462g	CAGL0J11682g	CAGL0K11022g	CAGL0K08624g		CAGL0I06160g						CAGL0I06160g	Temporally induced
	CAGL0L12320g	CAGL0J11484g	CAGL0J11748g	CAGL0K11044g	CAGL0K08690g		CAGL0I06182g						CAGL0I06182g	Temporally induced
	CAGL0L12452g	CAGL0J11550g	CAGL0J11770g	CAGL0K11418g	CAGL0K08734g		CAGL0I06204g						CAGL0I06204g	Temporally induced
	CAGL0L12474g	CAGL0J11682g	CAGL0J11836g	CAGL0K11440g	CAGL0K08756g		CAGL0I06270g						CAGL0I06270g	Temporally induced
	CAGL0L12540g	CAGL0J11748g	CAGL0J12034g	CAGL0K11462g	CAGL0K08844g		CAGL0I06380g						CAGL0I06380g	Temporally induced
	CAGL0L12760g	CAGL0J11770g	CAGL0K00671g	CAGL0K11572g	CAGL0K09130g		CAGL0I06402g						CAGL0I06402g	Temporally induced
	CAGL0L12782g	CAGL0J11836g	CAGL0K00781g	CAGL0K11594g	CAGL0K09460g		CAGL0I06490g						CAGL0I06490g	Temporally induced
	CAGL0L12870g	CAGL0J12034g	CAGL0K00803g	CAGL0K11616g	CAGL0K09724g		CAGL0I06721g						CAGL0I06721g	Temporally induced
	CAGL0L12914g	CAGL0K00605g	CAGL0K00935g	CAGL0K11682g	CAGL0K09900g		CAGL0I06743g						CAGL0I06743g	Temporally induced
	CAGL0L13200g	CAGL0K00671g	CAGL0K01067g	CAGL0K11726g	CAGL0K09922g		CAGL0I07051g						CAGL0I07051g	Temporally induced
	CAGL0L13222g	CAGL0K00781g	CAGL0K01133g	CAGL0K11748g	CAGL0K09966g		CAGL0I07139g						CAGL0I07139g	Temporally induced
	CAGL0L13299g	CAGL0K00803g	CAGL0K01155g	CAGL0K11858g	CAGL0K10164g		CAGL0I07227g						CAGL0I07227g	Temporally induced
	CAGL0L13332g	CAGL0K00935g	CAGL0K01177g	CAGL0K11880g	CAGL0K10274g		CAGL0I07249g						CAGL0I07249g	Temporally induced
	CAGL0L13376g	CAGL0K01067g	CAGL0K01199g	CAGL0K12012g	CAGL0K10780g		CAGL0I07293g						CAGL0I07293g	Temporally induced
	CAGL0L13392g	CAGL0K01133g	CAGL0K01243g	CAGL0K12034g	CAGL0K10868g		CAGL0I07447g						CAGL0I07447g	Temporally induced
	CAGL0L13431g	CAGL0K01155g	CAGL0K01287g	CAGL0K12100g	CAGL0K10906g		CAGL0I07491g						CAGL0I07491g	Temporally induced
	CAGL0M00638g	CAGL0K01177g	CAGL0K01309g	CAGL0K12254g	CAGL0K10956g		CAGL0I07557g						CAGL0I07557g	Temporally induced
	CAGL0M00814g	CAGL0K01199g	CAGL0K01331g	CAGL0K12276g	CAGL0K10978g		CAGL0I07667g						CAGL0I07667g	Temporally induced
	CAGL0M00880g	CAGL0K01243g	CAGL0K01353g	CAGL0K12694g	CAGL0K11022g		CAGL0I07689g						CAGL0I07689g	Temporally induced
	CAGL0M00902g	CAGL0K01287g	CAGL0K01683g	CAGL0K12738g	CAGL0K11044g		CAGL0I07821g						CAGL0I07821g	Temporally induced
	CAGL0M01474g	CAGL0K01309g	CAGL0K01727g	CAGL0K12804g	CAGL0K11418g		CAGL0I07837g						CAGL0I07837g	Temporally induced
	CAGL0M01562g	CAGL0K01331g	CAGL0K01749g	CAGL0K12826g	CAGL0K11440g		CAGL0I07843g						CAGL0I07843g	Temporally induced
	CAGL0M01628g	CAGL0K01353g	CAGL0K01837g	CAGL0K12848g	CAGL0K11462g		CAGL0I07865g						CAGL0I07865g	Temporally induced
	CAGL0M01650g	CAGL0K01661g	CAGL0K01859g	CAGL0K12980g	CAGL0K11572g		CAGL0I08041g						CAGL0I08041g	Temporally induced
	CAGL0M01804g	CAGL0K01683g	CAGL0K01969g	CAGL0L00583g	CAGL0K11594g		CAGL0I08305g						CAGL0I08305g	Temporally induced
	CAGL0M01826g	CAGL0K01727g	CAGL0K02035g	CAGL0L00605g	CAGL0K11616g		CAGL0I08327g						CAGL0I08327g	Temporally induced
	CAGL0M01848g	CAGL0K01793g	CAGL0K02079g	CAGL0L00649g	CAGL0K11660g		CAGL0I08393g						CAGL0I08393g	Temporally induced
	CAGL0M02101g	CAGL0K01837g	CAGL0K02123g	CAGL0L00671g	CAGL0K11682g		CAGL0I08459g						CAGL0I08459g	Temporally induced
	CAGL0M02123g	CAGL0K01859g	CAGL0K02145g	CAGL0L00759g	CAGL0K11726g		CAGL0I08503g						CAGL0I08503g	Temporally induced
	CAGL0M02211g	CAGL0K01969g	CAGL0K02255g	CAGL0L00825g	CAGL0K11748g		CAGL0I08525g						CAGL0I08525g	Temporally induced
	CAGL0M02365g	CAGL0K01991g	CAGL0K02321g	CAGL0L01331g	CAGL0K11858g		CAGL0I08613g						CAGL0I08613g	Temporally induced
	CAGL0M02497g	CAGL0K02035g	CAGL0K02475g	CAGL0L01353g	CAGL0K11880g		CAGL0I08635g						CAGL0I08635g	Temporally induced
	CAGL0M02629g	CAGL0K02079g	CAGL0K02497g	CAGL0L01727g	CAGL0K12012g		CAGL0I08767g						CAGL0I08767g	Temporally induced
	CAGL0M02673g	CAGL0K02123g	CAGL0K02519g	CAGL0L01925g	CAGL0K12034g		CAGL0I08965g						CAGL0I08965g	Temporally induced
	CAGL0M02695g	CAGL0K02145g	CAGL0K02739g	CAGL0L02035g	CAGL0K12100g		CAGL0I09240g						CAGL0I09240g	Temporally induced
	CAGL0M02849g	CAGL0K02255g	CAGL0K03069g	CAGL0L02321g	CAGL0K12254g		CAGL0I09262g						CAGL0I09262g	Temporally induced
	CAGL0M03465g	CAGL0K02277g	CAGL0K03135g	CAGL0L02453g	CAGL0K12276g		CAGL0I09284g						CAGL0I09284g	Temporally induced
	CAGL0M03487g	CAGL0K02321g	CAGL0K03201g	CAGL0L02475g	CAGL0K12694g		CAGL0I09592g						CAGL0I09592g	Temporally induced
	CAGL0M03553g	CAGL0K02475g	CAGL0K03421g	CAGL0L02497g	CAGL0K12738g		CAGL0I09746g						CAGL0I09746g	Temporally induced
	CAGL0M03575g	CAGL0K02497g	CAGL0K03443g	CAGL0L02799g	CAGL0K12804g		CAGL0I09790g						CAGL0I09790g	Temporally induced
	CAGL0M03773g	CAGL0K02519g	CAGL0K03459g	CAGL0L02915g	CAGL0K12826g		CAGL0I09856g						CAGL0I09856g	Temporally induced
	CAGL0M03839g	CAGL0K02541g	CAGL0K03465g	CAGL0L02937g	CAGL0K12980g		CAGL0I09878g						CAGL0I09878g	Temporally induced
	CAGL0M03861g	CAGL0K02739g	CAGL0K03663g	CAGL0L03091g	CAGL0L00495g		CAGL0I10054g						CAGL0I10054g	Temporally induced
	CAGL0M04169g	CAGL0K02893g	CAGL0K03685g	CAGL0L03135g	CAGL0L00583g		CAGL0I10098g						CAGL0I10098g	Temporally induced
	CAGL0M04191g	CAGL0K03069g	CAGL0K04125g	CAGL0L03157g	CAGL0L00605g		CAGL0I10147g						CAGL0I10147g	Temporally induced
	CAGL0M04477g	CAGL0K03135g	CAGL0K04147g	CAGL0L03289g	CAGL0L00649g		CAGL0I10200g						CAGL0I10200g	Temporally induced
	CAGL0M04675g	CAGL0K03459g	CAGL0K04235g	CAGL0L03630g	CAGL0L00671g		CAGL0I10211g						CAGL0I10211g	Temporally induced
	CAGL0M04873g	CAGL0K03465g	CAGL0K04257g	CAGL0L03828g	CAGL0L00759g		CAGL0I10246g						CAGL0I10246g	Temporally induced
	CAGL0M04983g	CAGL0K03663g	CAGL0K04279g	CAGL0L03846g	CAGL0L00825g		CAGL0I10340g						CAGL0I10340g	Temporally induced
	CAGL0M05005g	CAGL0K03685g	CAGL0K04301g	CAGL0L03982g	CAGL0L00847g		CAGL0I10362g						CAGL0I10362g	Temporally induced
	CAGL0M05181g	CAGL0K04125g	CAGL0K04477g	CAGL0L04312g	CAGL0L01111g		CAGL0I10384g						CAGL0I10384g	Temporally induced
	CAGL0M05599g	CAGL0K04147g	CAGL0K04587g	CAGL0L04510g	CAGL0L01309g		CAGL0I10406g						CAGL0I10406g	Temporally induced
	CAGL0M05951g	CAGL0K04235g	CAGL0K04719g	CAGL0L04532g	CAGL0L01331g		CAGL0I10472g						CAGL0I10472g	Temporally induced
	CAGL0M06083g	CAGL0K04301g	CAGL0K04741g	CAGL0L04598g	CAGL0L01353g		CAGL0I10494g						CAGL0I10494g	Temporally induced
	CAGL0M06171g	CAGL0K04367g	CAGL0K05027g	CAGL0L04708g	CAGL0L01727g		CAGL0I10516g						CAGL0I10516g	Temporally induced
	CAGL0M06303g	CAGL0K04477g	CAGL0K05071g	CAGL0L04840g	CAGL0L01925g		CAGL0I10538g						CAGL0I10538g	Temporally induced
	CAGL0M06347g	CAGL0K04499g	CAGL0K05093g	CAGL0L05148g	CAGL0L02035g		CAGL0I10648g						CAGL0I10648g	Temporally induced
	CAGL0M06457g	CAGL0K04587g	CAGL0K05137g	CAGL0L05236g	CAGL0L02321g		CAGL0I10747g						CAGL0I10747g	Temporally induced
	CAGL0M06501g	CAGL0K04741g	CAGL0K05357g	CAGL0L05258g	CAGL0L02453g		CAGL0I10967g						CAGL0I10967g	Temporally induced
	CAGL0M06523g	CAGL0K05027g	CAGL0K05390g	CAGL0L05434g	CAGL0L02475g		CAGL0I11011g						CAGL0I11011g	Temporally induced
	CAGL0M06677g	CAGL0K05071g	CAGL0K05401g	CAGL0L05456g	CAGL0L02497g		CAGL0J00165g						CAGL0J00165g	Temporally induced
	CAGL0M07073g	CAGL0K05093g	CAGL0K05731g	CAGL0L05500g	CAGL0L02799g		CAGL0J00253g						CAGL0J00253g	Temporally induced
	CAGL0M07161g	CAGL0K05137g	CAGL0K05753g	CAGL0L06160g	CAGL0L02915g		CAGL0J00275g						CAGL0J00275g	Temporally induced
	CAGL0M07205g	CAGL0K05357g	CAGL0K05813g	CAGL0L06248g	CAGL0L02937g		CAGL0J00429g						CAGL0J00429g	Temporally induced
	CAGL0M07315g	CAGL0K05390g	CAGL0K05973g	CAGL0L06270g	CAGL0L03091g		CAGL0J00451g						CAGL0J00451g	Temporally induced
	CAGL0M07337g	CAGL0K05401g	CAGL0K05995g	CAGL0L06424g	CAGL0L03135g		CAGL0J00473g						CAGL0J00473g	Temporally induced
	CAGL0M07612g	CAGL0K05753g	CAGL0K06061g	CAGL0L06534g	CAGL0L03289g		CAGL0J00715g						CAGL0J00715g	Temporally induced
	CAGL0M07920g	CAGL0K05813g	CAGL0K06149g	CAGL0L06732g	CAGL0L03630g		CAGL0J00737g						CAGL0J00737g	Temporally induced
	CAGL0M07942g	CAGL0K05973g	CAGL0K06259g	CAGL0L06754g	CAGL0L03828g		CAGL0J00803g						CAGL0J00803g	Temporally induced
	CAGL0M08118g	CAGL0K05995g	CAGL0K06380g	CAGL0L06798g	CAGL0L03846g		CAGL0J00825g						CAGL0J00825g	Temporally induced
	CAGL0M08382g	CAGL0K06061g	CAGL0K06391g	CAGL0L06820g	CAGL0L03982g		CAGL0J00847g						CAGL0J00847g	Temporally induced
	CAGL0M08492g	CAGL0K06149g	CAGL0K06545g	CAGL0L06886g	CAGL0L04312g		CAGL0J00869g						CAGL0J00869g	Temporally induced
	CAGL0M08514g	CAGL0K06259g	CAGL0K06567g	CAGL0L06908g	CAGL0L04510g		CAGL0J00891g						CAGL0J00891g	Temporally induced
	CAGL0M08536g	CAGL0K06281g	CAGL0K06699g	CAGL0L06952g	CAGL0L04598g		CAGL0J00935g						CAGL0J00935g	Temporally induced
	CAGL0M08552g	CAGL0K06391g	CAGL0K07007g	CAGL0L07436g	CAGL0L04708g		CAGL0J00957g						CAGL0J00957g	Temporally induced
	CAGL0M08602g	CAGL0K06413g	CAGL0K07183g	CAGL0L07480g	CAGL0L04840g		CAGL0J00968g						CAGL0J00968g	Temporally induced
	CAGL0M08646g	CAGL0K06567g	CAGL0K07205g	CAGL0L07502g	CAGL0L05148g		CAGL0J01155g						CAGL0J01155g	Temporally induced
	CAGL0M08800g	CAGL0K06655g	CAGL0K07293g	CAGL0L07546g	CAGL0L05236g		CAGL0J01177g						CAGL0J01177g	Temporally induced
	CAGL0M08910g	CAGL0K07183g	CAGL0K07392g	CAGL0L07722g	CAGL0L05258g		CAGL0J01265g						CAGL0J01265g	Temporally induced
	CAGL0M08932g	CAGL0K07205g	CAGL0K07414g	CAGL0L07744g	CAGL0L05434g		CAGL0J01287g						CAGL0J01287g	Temporally induced
	CAGL0M09207g	CAGL0K07293g	CAGL0K07458g	CAGL0L08008g	CAGL0L05456g		CAGL0J01309g						CAGL0J01309g	Temporally induced
	CAGL0M09229g	CAGL0K07414g	CAGL0K07480g	CAGL0L08110g	CAGL0L05500g		CAGL0J01331g						CAGL0J01331g	Temporally induced
	CAGL0M09295g	CAGL0K07436g	CAGL0K07524g	CAGL0L08114g	CAGL0L05742g		CAGL0J01353g						CAGL0J01353g	Temporally induced
	CAGL0M09471g	CAGL0K07480g	CAGL0K07634g	CAGL0L08118g	CAGL0L06160g		CAGL0J01441g						CAGL0J01441g	Temporally induced
	CAGL0M09581g	CAGL0K07524g	CAGL0K07832g	CAGL0L08448g	CAGL0L06248g		CAGL0J01595g						CAGL0J01595g	Temporally induced
	CAGL0M09603g	CAGL0K07788g	CAGL0K08382g	CAGL0L08932g	CAGL0L06270g		CAGL0J01699g						CAGL0J01699g	Temporally induced
	CAGL0M09779g	CAGL0K07832g	CAGL0K08624g	CAGL0L09383g	CAGL0L06424g		CAGL0J01848g						CAGL0J01848g	Temporally induced
	CAGL0M10241g	CAGL0K08382g	CAGL0K08690g	CAGL0L09801g	CAGL0L06534g		CAGL0J01870g						CAGL0J01870g	Temporally induced
	CAGL0M10417g	CAGL0K08624g	CAGL0K08734g	CAGL0L09911g	CAGL0L06732g		CAGL0J02266g						CAGL0J02266g	Temporally induced
	CAGL0M10439g	CAGL0K08646g	CAGL0K08756g	CAGL0L10043g	CAGL0L06754g		CAGL0J02354g						CAGL0J02354g	Temporally induced
	CAGL0M10549g	CAGL0K08668g	CAGL0K08844g	CAGL0L10186g	CAGL0L06798g		CAGL0J02508g						CAGL0J02508g	Temporally induced
	CAGL0M10615g	CAGL0K08734g	CAGL0K08910g	CAGL0L10362g	CAGL0L06820g		CAGL0J02530g						CAGL0J02530g	Temporally induced
	CAGL0M10890g	CAGL0K08756g	CAGL0K09130g	CAGL0L10406g	CAGL0L06886g		CAGL0J02552g						CAGL0J02552g	Temporally induced
	CAGL0M11110g	CAGL0K08844g	CAGL0K09680g	CAGL0L10560g	CAGL0L06908g		CAGL0J02684g						CAGL0J02684g	Temporally induced
	CAGL0M11462g	CAGL0K09130g	CAGL0K09702g	CAGL0L10714g	CAGL0L06952g		CAGL0J02794g						CAGL0J02794g	Temporally induced
	CAGL0M11473g	CAGL0K09460g	CAGL0K09724g	CAGL0L10758g	CAGL0L06974g		CAGL0J02882g						CAGL0J02882g	Temporally induced
	CAGL0M11572g	CAGL0K09724g	CAGL0K09790g	CAGL0L10780g	CAGL0L07436g		CAGL0J02904g						CAGL0J02904g	Temporally induced
	CAGL0M11660g	CAGL0K09900g	CAGL0K09900g	CAGL0L11132g	CAGL0L07480g		CAGL0J02926g						CAGL0J02926g	Temporally induced
	CAGL0M11704g	CAGL0K09922g	CAGL0K09922g	CAGL0L11462g	CAGL0L07502g		CAGL0J02948g						CAGL0J02948g	Temporally induced
	CAGL0M11726g	CAGL0K09966g	CAGL0K09966g	CAGL0L11484g	CAGL0L07546g		CAGL0J02992g						CAGL0J02992g	Temporally induced
	CAGL0M11748g	CAGL0K10164g	CAGL0K10164g	CAGL0L11792g	CAGL0L07722g		CAGL0J03014g						CAGL0J03014g	Temporally induced
	CAGL0M11902g	CAGL0K10274g	CAGL0K10274g	CAGL0L11990g	CAGL0L07744g		CAGL0J03058g						CAGL0J03058g	Temporally induced
	CAGL0M11946g	CAGL0K10340g	CAGL0K10296g	CAGL0L12056g	CAGL0L08008g		CAGL0J03080g						CAGL0J03080g	Temporally induced
	CAGL0M11990g	CAGL0K10780g	CAGL0K10780g	CAGL0L12078g	CAGL0L08110g		CAGL0J03102g						CAGL0J03102g	Temporally induced
	CAGL0M12034g	CAGL0K10868g	CAGL0K10868g	CAGL0L12254g	CAGL0L08114g		CAGL0J03146g						CAGL0J03146g	Temporally induced
	CAGL0M12122g	CAGL0K10906g	CAGL0K10906g	CAGL0L12298g	CAGL0L08118g		CAGL0J03212g						CAGL0J03212g	Temporally induced
	CAGL0M12188g	CAGL0K10912g	CAGL0K10956g	CAGL0L12320g	CAGL0L08448g		CAGL0J03234g						CAGL0J03234g	Temporally induced
	CAGL0M12320g	CAGL0K10956g	CAGL0K10978g	CAGL0L12364g	CAGL0L08932g		CAGL0J03256g						CAGL0J03256g	Temporally induced
	CAGL0M12408g	CAGL0K10978g	CAGL0K11022g	CAGL0L12474g	CAGL0L09383g		CAGL0J03498g						CAGL0J03498g	Temporally induced
	CAGL0M12430g	CAGL0K11044g	CAGL0K11044g	CAGL0L12540g	CAGL0L09713g		CAGL0J03608g						CAGL0J03608g	Temporally induced
	CAGL0M12474g	CAGL0K11418g	CAGL0K11297g	CAGL0L12760g	CAGL0L09801g		CAGL0J03630g						CAGL0J03630g	Temporally induced
	CAGL0M12496g	CAGL0K11440g	CAGL0K11418g	CAGL0L12782g	CAGL0L09911g		CAGL0J03652g						CAGL0J03652g	Temporally induced
	CAGL0M12551g	CAGL0K11462g	CAGL0K11440g	CAGL0L12870g	CAGL0L09933g		CAGL0J03850g						CAGL0J03850g	Temporally induced
	CAGL0M12595g	CAGL0K11572g	CAGL0K11462g	CAGL0L12892g	CAGL0L10015g		CAGL0J03916g						CAGL0J03916g	Temporally induced
	CAGL0M12705g	CAGL0K11594g	CAGL0K11572g	CAGL0L12914g	CAGL0L10043g		CAGL0J03960g						CAGL0J03960g	Temporally induced
	CAGL0M13035g	CAGL0K11616g	CAGL0K11594g	CAGL0L13200g	CAGL0L10186g		CAGL0J04004g						CAGL0J04004g	Temporally induced
	CAGL0M13057g	CAGL0K11660g	CAGL0K11616g	CAGL0L13222g	CAGL0L10362g		CAGL0J04048g						CAGL0J04048g	Temporally induced
	CAGL0M13079g	CAGL0K11682g	CAGL0K11660g	CAGL0L13299g	CAGL0L10406g		CAGL0J04070g						CAGL0J04070g	Temporally induced
	CAGL0M13101g	CAGL0K11726g	CAGL0K11682g	CAGL0L13332g	CAGL0L10560g		CAGL0J04114g						CAGL0J04114g	Temporally induced
	CAGL0M13189g	CAGL0K11748g	CAGL0K11726g	CAGL0L13376g	CAGL0L10714g		CAGL0J04158g						CAGL0J04158g	Temporally induced
	CAGL0M13255g	CAGL0K11858g	CAGL0K11748g	CAGL0L13392g	CAGL0L10758g		CAGL0J04202g						CAGL0J04202g	Temporally induced
	CAGL0M13321g	CAGL0K11880g	CAGL0K11858g	CAGL0L13431g	CAGL0L10780g		CAGL0J04224g						CAGL0J04224g	Temporally induced
	CAGL0M13343g	CAGL0K12012g	CAGL0K11880g	CAGL0M00814g	CAGL0L10978g		CAGL0J04268g						CAGL0J04268g	Temporally induced
	CAGL0M13629g	CAGL0K12034g	CAGL0K12012g	CAGL0M00874g	CAGL0L11132g		CAGL0J04400g						CAGL0J04400g	Temporally induced
	CAGL0M13937g	CAGL0K12056g	CAGL0K12034g	CAGL0M00880g	CAGL0L11462g		CAGL0J04554g						CAGL0J04554g	Temporally induced
		CAGL0K12100g	CAGL0K12056g	CAGL0M00902g	CAGL0L11484g		CAGL0J05038g						CAGL0J05038g	Temporally induced
		CAGL0K12254g	CAGL0K12100g	CAGL0M01364g	CAGL0L11792g		CAGL0J05060g						CAGL0J05060g	Temporally induced
		CAGL0K12276g	CAGL0K12254g	CAGL0M01474g	CAGL0L11990g		CAGL0J05159g						CAGL0J05159g	Temporally induced
		CAGL0K12672g	CAGL0K12276g	CAGL0M01562g	CAGL0L12056g		CAGL0J05247g						CAGL0J05247g	Temporally induced
		CAGL0K12694g	CAGL0K12672g	CAGL0M01628g	CAGL0L12078g		CAGL0J05258g						CAGL0J05258g	Temporally induced
		CAGL0K12804g	CAGL0K12694g	CAGL0M01650g	CAGL0L12254g		CAGL0J05280g						CAGL0J05280g	Temporally induced
		CAGL0K12826g	CAGL0K12738g	CAGL0M01826g	CAGL0L12298g		CAGL0J05390g						CAGL0J05390g	Temporally induced
		CAGL0K12848g	CAGL0K12804g	CAGL0M01848g	CAGL0L12320g		CAGL0J05412g						CAGL0J05412g	Temporally induced
		CAGL0K12980g	CAGL0K12826g	CAGL0M02101g	CAGL0L12364g		CAGL0J05434g						CAGL0J05434g	Temporally induced
		CAGL0L00429g	CAGL0K12848g	CAGL0M02123g	CAGL0L12474g		CAGL0J06006g						CAGL0J06006g	Temporally induced
		CAGL0L00649g	CAGL0K12980g	CAGL0M02167g	CAGL0L12540g		CAGL0J06050g						CAGL0J06050g	Temporally induced
		CAGL0L00671g	CAGL0L00495g	CAGL0M02211g	CAGL0L12760g		CAGL0J06204g						CAGL0J06204g	Temporally induced
		CAGL0L00759g	CAGL0L00605g	CAGL0M02365g	CAGL0L12782g		CAGL0J06374g						CAGL0J06374g	Temporally induced
		CAGL0L00825g	CAGL0L00649g	CAGL0M02497g	CAGL0L12870g		CAGL0J06380g						CAGL0J06380g	Temporally induced
		CAGL0L00847g	CAGL0L00671g	CAGL0M02629g	CAGL0L12914g		CAGL0J06402g						CAGL0J06402g	Temporally induced
		CAGL0L01067g	CAGL0L00759g	CAGL0M02695g	CAGL0L12936g		CAGL0J06600g						CAGL0J06600g	Temporally induced
		CAGL0L01331g	CAGL0L00825g	CAGL0M02849g	CAGL0L13222g		CAGL0J07238g						CAGL0J07238g	Temporally induced
		CAGL0L01353g	CAGL0L00847g	CAGL0M02937g	CAGL0L13299g		CAGL0J07568g						CAGL0J07568g	Temporally induced
		CAGL0L01485g	CAGL0L01111g	CAGL0M03377g	CAGL0L13332g		CAGL0J07590g						CAGL0J07590g	Temporally induced
		CAGL0L01551g	CAGL0L01331g	CAGL0M03487g	CAGL0L13376g		CAGL0J07612g						CAGL0J07612g	Temporally induced
		CAGL0L01727g	CAGL0L01353g	CAGL0M03553g	CAGL0L13392g		CAGL0J07678g						CAGL0J07678g	Temporally induced
		CAGL0L01925g	CAGL0L01727g	CAGL0M03773g	CAGL0L13431g		CAGL0J07898g						CAGL0J07898g	Temporally induced
		CAGL0L02013g	CAGL0L01925g	CAGL0M03839g	CAGL0M00814g		CAGL0J07980g						CAGL0J07980g	Temporally induced
		CAGL0L02035g	CAGL0L02013g	CAGL0M03861g	CAGL0M00874g		CAGL0J08162g						CAGL0J08162g	Temporally induced
		CAGL0L02079g	CAGL0L02035g	CAGL0M04169g	CAGL0M00880g		CAGL0J08184g						CAGL0J08184g	Temporally induced
		CAGL0L02299g	CAGL0L02299g	CAGL0M04191g	CAGL0M00902g		CAGL0J08294g						CAGL0J08294g	Temporally induced
		CAGL0L02321g	CAGL0L02321g	CAGL0M04213g	CAGL0M01364g		CAGL0J08316g						CAGL0J08316g	Temporally induced
		CAGL0L02475g	CAGL0L02343g	CAGL0M04675g	CAGL0M01474g		CAGL0J08657g						CAGL0J08657g	Temporally induced
		CAGL0L02497g	CAGL0L02475g	CAGL0M04807g	CAGL0M01562g		CAGL0J08679g						CAGL0J08679g	Temporally induced
		CAGL0L02799g	CAGL0L02497g	CAGL0M04873g	CAGL0M01628g		CAGL0J08712g						CAGL0J08712g	Temporally induced
		CAGL0L02915g	CAGL0L02717g	CAGL0M04983g	CAGL0M01650g		CAGL0J08976g						CAGL0J08976g	Temporally induced
		CAGL0L02937g	CAGL0L02799g	CAGL0M05005g	CAGL0M01826g		CAGL0J08998g						CAGL0J08998g	Temporally induced
		CAGL0L03091g	CAGL0L02915g	CAGL0M05379g	CAGL0M01848g		CAGL0J09064g						CAGL0J09064g	Temporally induced
		CAGL0L03157g	CAGL0L02937g	CAGL0M05401g	CAGL0M02101g		CAGL0J09086g						CAGL0J09086g	Temporally induced
		CAGL0L03289g	CAGL0L03091g	CAGL0M05423g	CAGL0M02123g		CAGL0J09196g						CAGL0J09196g	Temporally induced
		CAGL0L03311g	CAGL0L03135g	CAGL0M05511g	CAGL0M02167g		CAGL0J09240g						CAGL0J09240g	Temporally induced
		CAGL0L03630g	CAGL0L03157g	CAGL0M05599g	CAGL0M02211g		CAGL0J09262g						CAGL0J09262g	Temporally induced
		CAGL0L03846g	CAGL0L03289g	CAGL0M05665g	CAGL0M02365g		CAGL0J09306g						CAGL0J09306g	Temporally induced
		CAGL0L03982g	CAGL0L03311g	CAGL0M05995g	CAGL0M02497g		CAGL0J09328g						CAGL0J09328g	Temporally induced
		CAGL0L04312g	CAGL0L03630g	CAGL0M06083g	CAGL0M02629g		CAGL0J09350g						CAGL0J09350g	Temporally induced
		CAGL0L04378g	CAGL0L03828g	CAGL0M06171g	CAGL0M02695g		CAGL0J09372g						CAGL0J09372g	Temporally induced
		CAGL0L04510g	CAGL0L03982g	CAGL0M06303g	CAGL0M02849g		CAGL0J09592g						CAGL0J09592g	Temporally induced
		CAGL0L04532g	CAGL0L04312g	CAGL0M06347g	CAGL0M02937g		CAGL0J09614g						CAGL0J09614g	Temporally induced
		CAGL0L04598g	CAGL0L04378g	CAGL0M06457g	CAGL0M03487g		CAGL0J09680g						CAGL0J09680g	Temporally induced
		CAGL0L04664g	CAGL0L04510g	CAGL0M06479g	CAGL0M03553g		CAGL0J09702g						CAGL0J09702g	Temporally induced
		CAGL0L04708g	CAGL0L04598g	CAGL0M06501g	CAGL0M03773g		CAGL0J09724g						CAGL0J09724g	Temporally induced
		CAGL0L04840g	CAGL0L04664g	CAGL0M06523g	CAGL0M03839g		CAGL0J09812g						CAGL0J09812g	Temporally induced
		CAGL0L05148g	CAGL0L04708g	CAGL0M06655g	CAGL0M03861g		CAGL0J09900g						CAGL0J09900g	Temporally induced
		CAGL0L05236g	CAGL0L04840g	CAGL0M06677g	CAGL0M04169g		CAGL0J09922g						CAGL0J09922g	Temporally induced
		CAGL0L05258g	CAGL0L05148g	CAGL0M07073g	CAGL0M04191g		CAGL0J09944g						CAGL0J09944g	Temporally induced
		CAGL0L05412g	CAGL0L05236g	CAGL0M07161g	CAGL0M04213g		CAGL0J09966g						CAGL0J09966g	Temporally induced
		CAGL0L05434g	CAGL0L05258g	CAGL0M07315g	CAGL0M04675g		CAGL0J10076g						CAGL0J10076g	Temporally induced
		CAGL0L05456g	CAGL0L05390g	CAGL0M07612g	CAGL0M04807g		CAGL0J10098g						CAGL0J10098g	Temporally induced
		CAGL0L05500g	CAGL0L05412g	CAGL0M07634g	CAGL0M04873g		CAGL0J10164g						CAGL0J10164g	Temporally induced
		CAGL0L05742g	CAGL0L05434g	CAGL0M07656g	CAGL0M04983g		CAGL0J10186g						CAGL0J10186g	Temporally induced
		CAGL0L06094g	CAGL0L05456g	CAGL0M07920g	CAGL0M05005g		CAGL0J10318g						CAGL0J10318g	Temporally induced
		CAGL0L06138g	CAGL0L05478g	CAGL0M07942g	CAGL0M05379g		CAGL0J10384g						CAGL0J10384g	Temporally induced
		CAGL0L06160g	CAGL0L05500g	CAGL0M08118g	CAGL0M05401g		CAGL0J10494g						CAGL0J10494g	Temporally induced
		CAGL0L06204g	CAGL0L05742g	CAGL0M08492g	CAGL0M05423g		CAGL0J10802g						CAGL0J10802g	Temporally induced
		CAGL0L06248g	CAGL0L06160g	CAGL0M08514g	CAGL0M05511g		CAGL0J10846g						CAGL0J10846g	Temporally induced
		CAGL0L06270g	CAGL0L06204g	CAGL0M08536g	CAGL0M05599g		CAGL0J11132g						CAGL0J11132g	Temporally induced
		CAGL0L06424g	CAGL0L06248g	CAGL0M08552g	CAGL0M05665g		CAGL0J11220g						CAGL0J11220g	Temporally induced
		CAGL0L06534g	CAGL0L06270g	CAGL0M08602g	CAGL0M05995g		CAGL0J11242g						CAGL0J11242g	Temporally induced
		CAGL0L06732g	CAGL0L06424g	CAGL0M08624g	CAGL0M06083g		CAGL0J11462g						CAGL0J11462g	Temporally induced
		CAGL0L06754g	CAGL0L06490g	CAGL0M08800g	CAGL0M06171g		CAGL0J11484g						CAGL0J11484g	Temporally induced
		CAGL0L06798g	CAGL0L06534g	CAGL0M08932g	CAGL0M06303g		CAGL0J11550g						CAGL0J11550g	Temporally induced
		CAGL0L06820g	CAGL0L06600g	CAGL0M09020g	CAGL0M06347g		CAGL0J11682g						CAGL0J11682g	Temporally induced
		CAGL0L06886g	CAGL0L06732g	CAGL0M09207g	CAGL0M06457g		CAGL0J11748g						CAGL0J11748g	Temporally induced
		CAGL0L06908g	CAGL0L06754g	CAGL0M09229g	CAGL0M06479g		CAGL0J11770g						CAGL0J11770g	Temporally induced
		CAGL0L06952g	CAGL0L06798g	CAGL0M09471g	CAGL0M06501g		CAGL0J11836g						CAGL0J11836g	Temporally induced
		CAGL0L07436g	CAGL0L06820g	CAGL0M09515g	CAGL0M06523g		CAGL0J11990g						CAGL0J11990g	Temporally induced
		CAGL0L07480g	CAGL0L06886g	CAGL0M09581g	CAGL0M06655g		CAGL0J12034g						CAGL0J12034g	Temporally induced
		CAGL0L07502g	CAGL0L06908g	CAGL0M10087g	CAGL0M07073g		CAGL0K00110g						CAGL0K00110g	Temporally induced
		CAGL0L07546g	CAGL0L06952g	CAGL0M10235g	CAGL0M07161g		CAGL0K00170g						CAGL0K00170g	Temporally induced
		CAGL0L07722g	CAGL0L06974g	CAGL0M10241g	CAGL0M07205g		CAGL0K00605g						CAGL0K00605g	Temporally induced
		CAGL0L07744g	CAGL0L07436g	CAGL0M10417g	CAGL0M07315g		CAGL0K00671g						CAGL0K00671g	Temporally induced
		CAGL0L07810g	CAGL0L07480g	CAGL0M10549g	CAGL0M07381g		CAGL0K00781g						CAGL0K00781g	Temporally induced
		CAGL0L08008g	CAGL0L07502g	CAGL0M10890g	CAGL0M07634g		CAGL0K00803g						CAGL0K00803g	Temporally induced
		CAGL0L08110g	CAGL0L07546g	CAGL0M11000g	CAGL0M07656g		CAGL0K00935g						CAGL0K00935g	Temporally induced
		CAGL0L08114g	CAGL0L07722g	CAGL0M11104g	CAGL0M07920g		CAGL0K01067g						CAGL0K01067g	Temporally induced
		CAGL0L08118g	CAGL0L07744g	CAGL0M11110g	CAGL0M07942g		CAGL0K01133g						CAGL0K01133g	Temporally induced
		CAGL0L08294g	CAGL0L08008g	CAGL0M11462g	CAGL0M08118g		CAGL0K01155g						CAGL0K01155g	Temporally induced
		CAGL0L08426g	CAGL0L08110g	CAGL0M11473g	CAGL0M08492g		CAGL0K01177g						CAGL0K01177g	Temporally induced
		CAGL0L08448g	CAGL0L08114g	CAGL0M11660g	CAGL0M08514g		CAGL0K01199g						CAGL0K01199g	Temporally induced
		CAGL0L08712g	CAGL0L08118g	CAGL0M11704g	CAGL0M08536g		CAGL0K01243g						CAGL0K01243g	Temporally induced
		CAGL0L08932g	CAGL0L08426g	CAGL0M11726g	CAGL0M08552g		CAGL0K01287g						CAGL0K01287g	Temporally induced
		CAGL0L09108g	CAGL0L08448g	CAGL0M11902g	CAGL0M08602g		CAGL0K01309g						CAGL0K01309g	Temporally induced
		CAGL0L09383g	CAGL0L08712g	CAGL0M11946g	CAGL0M08624g		CAGL0K01331g						CAGL0K01331g	Temporally induced
		CAGL0L09581g	CAGL0L08932g	CAGL0M11990g	CAGL0M08800g		CAGL0K01353g						CAGL0K01353g	Temporally induced
		CAGL0L09713g	CAGL0L09383g	CAGL0M12034g	CAGL0M08932g		CAGL0K01375g						CAGL0K01375g	Temporally induced
		CAGL0L09801g	CAGL0L09581g	CAGL0M12188g	CAGL0M09020g		CAGL0K01661g						CAGL0K01661g	Temporally induced
		CAGL0L09911g	CAGL0L09713g	CAGL0M12320g	CAGL0M09207g		CAGL0K01683g						CAGL0K01683g	Temporally induced
		CAGL0L09933g	CAGL0L09801g	CAGL0M12408g	CAGL0M09229g		CAGL0K01727g						CAGL0K01727g	Temporally induced
		CAGL0L09955g	CAGL0L09911g	CAGL0M12430g	CAGL0M09295g		CAGL0K01749g						CAGL0K01749g	Temporally induced
		CAGL0L10043g	CAGL0L09933g	CAGL0M12474g	CAGL0M09471g		CAGL0K01793g						CAGL0K01793g	Temporally induced
		CAGL0L10186g	CAGL0L09955g	CAGL0M12496g	CAGL0M09515g		CAGL0K01837g						CAGL0K01837g	Temporally induced
		CAGL0L10362g	CAGL0L10015g	CAGL0M12551g	CAGL0M09581g		CAGL0K01859g						CAGL0K01859g	Temporally induced
		CAGL0L10406g	CAGL0L10043g	CAGL0M12595g	CAGL0M10087g		CAGL0K01947g						CAGL0K01947g	Temporally induced
		CAGL0L10560g	CAGL0L10186g	CAGL0M12705g	CAGL0M10241g		CAGL0K01969g						CAGL0K01969g	Temporally induced
		CAGL0L10648g	CAGL0L10208g	CAGL0M12837g	CAGL0M10439g		CAGL0K01991g						CAGL0K01991g	Temporally induced
		CAGL0L10714g	CAGL0L10362g	CAGL0M12881g	CAGL0M10549g		CAGL0K02035g						CAGL0K02035g	Temporally induced
		CAGL0L10758g	CAGL0L10406g	CAGL0M13035g	CAGL0M10571g		CAGL0K02079g						CAGL0K02079g	Temporally induced
		CAGL0L10780g	CAGL0L10560g	CAGL0M13057g	CAGL0M10890g		CAGL0K02123g						CAGL0K02123g	Temporally induced
		CAGL0L10868g	CAGL0L10714g	CAGL0M13079g	CAGL0M11000g		CAGL0K02145g						CAGL0K02145g	Temporally induced
		CAGL0L10978g	CAGL0L10758g	CAGL0M13101g	CAGL0M11104g		CAGL0K02255g						CAGL0K02255g	Temporally induced
		CAGL0L11132g	CAGL0L10780g	CAGL0M13189g	CAGL0M11110g		CAGL0K02277g						CAGL0K02277g	Temporally induced
		CAGL0L11462g	CAGL0L10978g	CAGL0M13277g	CAGL0M11462g		CAGL0K02321g						CAGL0K02321g	Constitutively expressed
		CAGL0L11484g	CAGL0L11132g	CAGL0M13343g	CAGL0M11473g		CAGL0K02475g						CAGL0K02475g	Constitutively expressed
		CAGL0L11792g	CAGL0L11462g	CAGL0M13629g	CAGL0M11660g		CAGL0K02497g						CAGL0K02497g	Constitutively expressed
		CAGL0L11836g	CAGL0L11484g	CAGL0M13651g	CAGL0M11704g		CAGL0K02519g						CAGL0K02519g	Constitutively expressed
		CAGL0L11990g	CAGL0L11792g	CAGL0M13849g	CAGL0M11726g		CAGL0K02541g						CAGL0K02541g	Constitutively expressed
		CAGL0L12056g	CAGL0L11880g	CAGL0M13893g	CAGL0M11748g		CAGL0K02739g						CAGL0K02739g	Constitutively expressed
		CAGL0L12078g	CAGL0L11990g	CAGL0M13937g	CAGL0M11902g		CAGL0K02893g						CAGL0K02893g	Constitutively expressed
		CAGL0L12254g	CAGL0L12056g	CAGL0M14003g	CAGL0M11946g		CAGL0K03069g						CAGL0K03069g	Constitutively expressed
		CAGL0L12298g	CAGL0L12078g		CAGL0M11990g		CAGL0K03135g						CAGL0K03135g	Constitutively expressed
		CAGL0L12320g	CAGL0L12254g		CAGL0M12034g		CAGL0K03201g						CAGL0K03201g	Constitutively expressed
		CAGL0L12364g	CAGL0L12298g		CAGL0M12188g		CAGL0K03421g						CAGL0K03421g	Constitutively expressed
		CAGL0L12452g	CAGL0L12320g		CAGL0M12320g		CAGL0K03443g						CAGL0K03443g	Constitutively expressed
		CAGL0L12474g	CAGL0L12364g		CAGL0M12408g		CAGL0K03459g						CAGL0K03459g	Constitutively expressed
		CAGL0L12540g	CAGL0L12474g		CAGL0M12430g		CAGL0K03465g						CAGL0K03465g	Constitutively expressed
		CAGL0L12760g	CAGL0L12540g		CAGL0M12474g		CAGL0K03553g						CAGL0K03553g	Constitutively expressed
		CAGL0L12870g	CAGL0L12760g		CAGL0M12496g		CAGL0K03663g						CAGL0K03663g	Constitutively expressed
		CAGL0L12914g	CAGL0L12870g		CAGL0M12551g		CAGL0K03685g						CAGL0K03685g	Constitutively expressed
		CAGL0L12936g	CAGL0L12914g		CAGL0M12595g		CAGL0K04125g						CAGL0K04125g	Constitutively expressed
		CAGL0L13200g	CAGL0L12936g		CAGL0M12705g		CAGL0K04147g						CAGL0K04147g	Constitutively expressed
		CAGL0L13222g	CAGL0L13200g		CAGL0M12837g		CAGL0K04235g						CAGL0K04235g	Constitutively expressed
		CAGL0L13299g	CAGL0L13222g		CAGL0M12881g		CAGL0K04257g						CAGL0K04257g	Constitutively expressed
		CAGL0L13332g	CAGL0L13299g		CAGL0M13035g		CAGL0K04279g						CAGL0K04279g	Constitutively expressed
		CAGL0L13376g	CAGL0L13332g		CAGL0M13057g		CAGL0K04301g						CAGL0K04301g	Constitutively expressed
		CAGL0L13392g	CAGL0L13376g		CAGL0M13079g		CAGL0K04367g						CAGL0K04367g	Constitutively expressed
		CAGL0L13431g	CAGL0L13392g		CAGL0M13101g		CAGL0K04477g						CAGL0K04477g	Constitutively expressed
		CAGL0M00814g	CAGL0L13431g		CAGL0M13189g		CAGL0K04499g						CAGL0K04499g	Constitutively expressed
		CAGL0M00874g	CAGL0M00660g		CAGL0M13255g		CAGL0K04587g						CAGL0K04587g	Constitutively expressed
		CAGL0M00902g	CAGL0M00814g		CAGL0M13277g		CAGL0K04719g						CAGL0K04719g	Constitutively expressed
		CAGL0M01364g	CAGL0M00874g		CAGL0M13343g		CAGL0K04741g						CAGL0K04741g	Constitutively expressed
		CAGL0M01474g	CAGL0M00880g		CAGL0M13629g		CAGL0K05027g						CAGL0K05027g	Constitutively expressed
		CAGL0M01562g	CAGL0M00902g		CAGL0M13651g		CAGL0K05071g						CAGL0K05071g	Constitutively expressed
		CAGL0M01628g	CAGL0M01364g		CAGL0M13893g		CAGL0K05093g						CAGL0K05093g	Constitutively expressed
		CAGL0M01650g	CAGL0M01474g		CAGL0M13937g		CAGL0K05137g						CAGL0K05137g	Constitutively expressed
		CAGL0M01804g	CAGL0M01562g		CAGL0M14003g		CAGL0K05357g						CAGL0K05357g	Constitutively expressed
		CAGL0M01826g	CAGL0M01628g				CAGL0K05390g						CAGL0K05390g	Constitutively expressed
		CAGL0M01848g	CAGL0M01650g				CAGL0K05401g						CAGL0K05401g	Constitutively expressed
		CAGL0M02101g	CAGL0M01826g				CAGL0K05423g						CAGL0K05423g	Constitutively expressed
		CAGL0M02123g	CAGL0M01848g				CAGL0K05643g						CAGL0K05643g	Constitutively expressed
		CAGL0M02167g	CAGL0M02101g				CAGL0K05731g						CAGL0K05731g	Constitutively expressed
		CAGL0M02211g	CAGL0M02123g				CAGL0K05753g						CAGL0K05753g	Constitutively expressed
		CAGL0M02365g	CAGL0M02167g				CAGL0K05813g						CAGL0K05813g	Constitutively expressed
		CAGL0M02497g	CAGL0M02211g				CAGL0K05973g						CAGL0K05973g	Constitutively expressed
		CAGL0M02629g	CAGL0M02365g				CAGL0K05995g						CAGL0K05995g	Constitutively expressed
		CAGL0M02695g	CAGL0M02497g				CAGL0K06061g						CAGL0K06061g	Constitutively expressed
		CAGL0M02849g	CAGL0M02629g				CAGL0K06149g						CAGL0K06149g	Constitutively expressed
		CAGL0M03465g	CAGL0M02673g				CAGL0K06259g						CAGL0K06259g	Constitutively expressed
		CAGL0M03487g	CAGL0M02695g				CAGL0K06281g						CAGL0K06281g	Constitutively expressed
		CAGL0M03553g	CAGL0M02849g				CAGL0K06380g						CAGL0K06380g	Constitutively expressed
		CAGL0M03575g	CAGL0M02937g				CAGL0K06391g						CAGL0K06391g	Constitutively expressed
		CAGL0M03773g	CAGL0M03377g				CAGL0K06413g						CAGL0K06413g	Constitutively expressed
		CAGL0M03839g	CAGL0M03487g				CAGL0K06545g						CAGL0K06545g	Constitutively expressed
		CAGL0M03861g	CAGL0M03553g				CAGL0K06567g						CAGL0K06567g	Constitutively expressed
		CAGL0M03883g	CAGL0M03575g				CAGL0K06633g						CAGL0K06633g	Constitutively expressed
		CAGL0M04169g	CAGL0M03773g				CAGL0K06655g						CAGL0K06655g	Constitutively expressed
		CAGL0M04191g	CAGL0M03839g				CAGL0K06699g						CAGL0K06699g	Constitutively expressed
		CAGL0M04213g	CAGL0M03861g				CAGL0K07007g						CAGL0K07007g	Constitutively expressed
		CAGL0M04675g	CAGL0M03883g				CAGL0K07183g						CAGL0K07183g	Constitutively expressed
		CAGL0M04873g	CAGL0M04169g				CAGL0K07205g						CAGL0K07205g	Constitutively expressed
		CAGL0M04983g	CAGL0M04191g				CAGL0K07293g						CAGL0K07293g	Constitutively expressed
		CAGL0M05005g	CAGL0M04213g				CAGL0K07392g						CAGL0K07392g	Constitutively expressed
		CAGL0M05401g	CAGL0M04675g				CAGL0K07414g						CAGL0K07414g	Constitutively expressed
		CAGL0M05423g	CAGL0M04873g				CAGL0K07436g						CAGL0K07436g	Constitutively expressed
		CAGL0M05593g	CAGL0M04983g				CAGL0K07458g						CAGL0K07458g	Constitutively expressed
		CAGL0M05599g	CAGL0M05005g				CAGL0K07480g						CAGL0K07480g	Constitutively expressed
		CAGL0M05665g	CAGL0M05379g				CAGL0K07524g						CAGL0K07524g	Constitutively expressed
		CAGL0M05995g	CAGL0M05401g				CAGL0K07634g						CAGL0K07634g	Constitutively expressed
		CAGL0M06083g	CAGL0M05423g				CAGL0K07788g						CAGL0K07788g	Constitutively expressed
		CAGL0M06171g	CAGL0M05511g				CAGL0K07832g						CAGL0K07832g	Constitutively expressed
		CAGL0M06303g	CAGL0M05599g				CAGL0K07854g						CAGL0K07854g	Constitutively expressed
		CAGL0M06457g	CAGL0M05665g				CAGL0K08382g						CAGL0K08382g	Constitutively expressed
		CAGL0M06479g	CAGL0M05995g				CAGL0K08624g						CAGL0K08624g	Constitutively expressed
		CAGL0M06501g	CAGL0M06083g				CAGL0K08646g						CAGL0K08646g	Constitutively expressed
		CAGL0M06523g	CAGL0M06171g				CAGL0K08668g						CAGL0K08668g	Constitutively expressed
		CAGL0M06633g	CAGL0M06303g				CAGL0K08690g						CAGL0K08690g	Constitutively expressed
		CAGL0M06655g	CAGL0M06347g				CAGL0K08712g						CAGL0K08712g	Constitutively expressed
		CAGL0M06677g	CAGL0M06457g				CAGL0K08734g						CAGL0K08734g	Constitutively expressed
		CAGL0M07029g	CAGL0M06479g				CAGL0K08756g						CAGL0K08756g	Constitutively expressed
		CAGL0M07073g	CAGL0M06501g				CAGL0K08844g						CAGL0K08844g	Constitutively expressed
		CAGL0M07161g	CAGL0M06523g				CAGL0K08910g						CAGL0K08910g	Constitutively expressed
		CAGL0M07315g	CAGL0M06633g				CAGL0K09130g						CAGL0K09130g	Constitutively expressed
		CAGL0M07656g	CAGL0M06655g				CAGL0K09460g						CAGL0K09460g	Constitutively expressed
		CAGL0M07920g	CAGL0M06677g				CAGL0K09680g						CAGL0K09680g	Constitutively expressed
		CAGL0M07942g	CAGL0M07073g				CAGL0K09702g						CAGL0K09702g	Constitutively expressed
		CAGL0M08118g	CAGL0M07161g				CAGL0K09724g						CAGL0K09724g	Constitutively expressed
		CAGL0M08206g	CAGL0M07205g				CAGL0K09790g						CAGL0K09790g	Constitutively expressed
		CAGL0M08382g	CAGL0M07315g				CAGL0K09900g						CAGL0K09900g	Constitutively expressed
		CAGL0M08492g	CAGL0M07381g				CAGL0K09922g						CAGL0K09922g	Constitutively expressed
		CAGL0M08514g	CAGL0M07513g				CAGL0K09966g						CAGL0K09966g	Constitutively expressed
		CAGL0M08536g	CAGL0M07656g				CAGL0K10164g						CAGL0K10164g	Constitutively expressed
		CAGL0M08552g	CAGL0M07920g				CAGL0K10274g						CAGL0K10274g	Constitutively expressed
		CAGL0M08602g	CAGL0M07942g				CAGL0K10296g						CAGL0K10296g	Constitutively expressed
		CAGL0M08624g	CAGL0M08118g				CAGL0K10340g						CAGL0K10340g	Constitutively expressed
		CAGL0M08800g	CAGL0M08382g				CAGL0K10604g						CAGL0K10604g	Constitutively expressed
		CAGL0M08932g	CAGL0M08492g				CAGL0K10780g						CAGL0K10780g	Constitutively expressed
		CAGL0M09020g	CAGL0M08514g				CAGL0K10824g						CAGL0K10824g	Constitutively expressed
		CAGL0M09229g	CAGL0M08536g				CAGL0K10868g						CAGL0K10868g	Constitutively expressed
		CAGL0M09273g	CAGL0M08552g				CAGL0K10906g						CAGL0K10906g	Constitutively expressed
		CAGL0M09295g	CAGL0M08602g				CAGL0K10912g						CAGL0K10912g	Constitutively expressed
		CAGL0M09471g	CAGL0M08624g				CAGL0K10956g						CAGL0K10956g	Constitutively expressed
		CAGL0M09515g	CAGL0M08734g				CAGL0K10978g						CAGL0K10978g	Constitutively expressed
		CAGL0M09581g	CAGL0M08800g				CAGL0K11022g						CAGL0K11022g	Constitutively expressed
		CAGL0M10087g	CAGL0M08932g				CAGL0K11044g						CAGL0K11044g	Constitutively expressed
		CAGL0M10241g	CAGL0M09020g				CAGL0K11231g						CAGL0K11231g	Constitutively expressed
		CAGL0M10417g	CAGL0M09185g				CAGL0K11297g						CAGL0K11297g	Constitutively expressed
		CAGL0M10549g	CAGL0M09207g				CAGL0K11418g						CAGL0K11418g	Constitutively expressed
		CAGL0M10890g	CAGL0M09229g				CAGL0K11440g						CAGL0K11440g	Constitutively expressed
		CAGL0M10956g	CAGL0M09295g				CAGL0K11462g						CAGL0K11462g	Constitutively expressed
		CAGL0M11104g	CAGL0M09471g				CAGL0K11572g						CAGL0K11572g	Constitutively expressed
		CAGL0M11110g	CAGL0M09515g				CAGL0K11594g						CAGL0K11594g	Constitutively expressed
		CAGL0M11462g	CAGL0M09581g				CAGL0K11616g						CAGL0K11616g	Constitutively expressed
		CAGL0M11473g	CAGL0M09955g				CAGL0K11660g						CAGL0K11660g	Constitutively expressed
		CAGL0M11484g	CAGL0M10087g				CAGL0K11682g						CAGL0K11682g	Constitutively expressed
		CAGL0M11660g	CAGL0M10235g				CAGL0K11726g						CAGL0K11726g	Constitutively expressed
		CAGL0M11704g	CAGL0M10241g				CAGL0K11748g						CAGL0K11748g	Constitutively expressed
		CAGL0M11726g	CAGL0M10417g				CAGL0K11858g						CAGL0K11858g	Constitutively expressed
		CAGL0M11748g	CAGL0M10439g				CAGL0K11880g						CAGL0K11880g	Constitutively expressed
		CAGL0M11902g	CAGL0M10549g				CAGL0K12012g						CAGL0K12012g	Constitutively expressed
		CAGL0M11946g	CAGL0M10890g				CAGL0K12034g						CAGL0K12034g	Constitutively expressed
		CAGL0M11990g	CAGL0M10956g				CAGL0K12056g						CAGL0K12056g	Constitutively expressed
		CAGL0M12034g	CAGL0M11000g				CAGL0K12100g						CAGL0K12100g	Constitutively expressed
		CAGL0M12122g	CAGL0M11104g				CAGL0K12254g						CAGL0K12254g	Constitutively expressed
		CAGL0M12188g	CAGL0M11110g				CAGL0K12276g						CAGL0K12276g	Constitutively expressed
		CAGL0M12320g	CAGL0M11462g				CAGL0K12672g						CAGL0K12672g	Constitutively expressed
		CAGL0M12386g	CAGL0M11473g				CAGL0K12694g						CAGL0K12694g	Constitutively expressed
		CAGL0M12408g	CAGL0M11660g				CAGL0K12738g						CAGL0K12738g	Constitutively expressed
		CAGL0M12430g	CAGL0M11704g				CAGL0K12804g						CAGL0K12804g	Constitutively expressed
		CAGL0M12474g	CAGL0M11726g				CAGL0K12826g						CAGL0K12826g	Constitutively expressed
		CAGL0M12496g	CAGL0M11748g				CAGL0K12848g						CAGL0K12848g	Constitutively expressed
		CAGL0M12551g	CAGL0M11902g				CAGL0K12980g						CAGL0K12980g	Constitutively expressed
		CAGL0M12573g	CAGL0M11946g				CAGL0L00157g						CAGL0L00157g	Constitutively expressed
		CAGL0M12595g	CAGL0M11990g				CAGL0L00429g						CAGL0L00429g	Constitutively expressed
		CAGL0M12705g	CAGL0M12034g				CAGL0L00495g						CAGL0L00495g	Constitutively expressed
		CAGL0M12837g	CAGL0M12188g				CAGL0L00583g						CAGL0L00583g	Constitutively expressed
		CAGL0M12881g	CAGL0M12320g				CAGL0L00605g						CAGL0L00605g	Constitutively expressed
		CAGL0M13035g	CAGL0M12386g				CAGL0L00649g						CAGL0L00649g	Constitutively expressed
		CAGL0M13057g	CAGL0M12408g				CAGL0L00671g						CAGL0L00671g	Constitutively expressed
		CAGL0M13079g	CAGL0M12430g				CAGL0L00759g						CAGL0L00759g	Constitutively expressed
		CAGL0M13101g	CAGL0M12474g				CAGL0L00825g						CAGL0L00825g	Constitutively expressed
		CAGL0M13189g	CAGL0M12496g				CAGL0L00847g						CAGL0L00847g	Constitutively expressed
		CAGL0M13255g	CAGL0M12551g				CAGL0L01067g						CAGL0L01067g	Constitutively expressed
		CAGL0M13277g	CAGL0M12595g				CAGL0L01111g						CAGL0L01111g	Constitutively expressed
		CAGL0M13343g	CAGL0M12705g				CAGL0L01309g						CAGL0L01309g	Constitutively expressed
		CAGL0M13629g	CAGL0M12837g				CAGL0L01331g						CAGL0L01331g	Constitutively expressed
		CAGL0M13651g	CAGL0M12881g				CAGL0L01353g						CAGL0L01353g	Constitutively expressed
		CAGL0M13717g	CAGL0M12925g				CAGL0L01485g						CAGL0L01485g	Constitutively expressed
		CAGL0M13893g	CAGL0M13035g				CAGL0L01551g						CAGL0L01551g	Constitutively expressed
		CAGL0M13937g	CAGL0M13057g				CAGL0L01727g						CAGL0L01727g	Constitutively expressed
		CAGL0M14003g	CAGL0M13079g				CAGL0L01925g						CAGL0L01925g	Constitutively expressed
			CAGL0M13101g				CAGL0L02013g						CAGL0L02013g	Constitutively expressed
			CAGL0M13189g				CAGL0L02035g						CAGL0L02035g	Constitutively expressed
			CAGL0M13255g				CAGL0L02079g						CAGL0L02079g	Constitutively expressed
			CAGL0M13277g				CAGL0L02211g						CAGL0L02211g	Constitutively expressed
			CAGL0M13321g				CAGL0L02299g						CAGL0L02299g	Constitutively expressed
			CAGL0M13343g				CAGL0L02321g						CAGL0L02321g	Constitutively expressed
			CAGL0M13629g				CAGL0L02343g						CAGL0L02343g	Constitutively expressed
			CAGL0M13651g				CAGL0L02453g						CAGL0L02453g	Constitutively expressed
			CAGL0M13805g				CAGL0L02475g						CAGL0L02475g	Constitutively expressed
			CAGL0M13937g				CAGL0L02497g						CAGL0L02497g	Constitutively expressed
			CAGL0M14003g				CAGL0L02717g						CAGL0L02717g	Constitutively expressed
			CAGL0M14025g				CAGL0L02799g						CAGL0L02799g	Constitutively expressed
							CAGL0L02915g						CAGL0L02915g	Constitutively expressed
							CAGL0L02937g						CAGL0L02937g	Constitutively expressed
							CAGL0L03091g						CAGL0L03091g	Constitutively expressed
							CAGL0L03135g						CAGL0L03135g	Constitutively expressed
							CAGL0L03157g						CAGL0L03157g	Constitutively expressed
							CAGL0L03267g						CAGL0L03267g	Constitutively expressed
							CAGL0L03289g						CAGL0L03289g	Constitutively expressed
							CAGL0L03311g						CAGL0L03311g	Constitutively expressed
							CAGL0L03630g						CAGL0L03630g	Constitutively expressed
							CAGL0L03828g						CAGL0L03828g	Constitutively expressed
							CAGL0L03846g						CAGL0L03846g	Constitutively expressed
							CAGL0L03982g						CAGL0L03982g	Constitutively expressed
							CAGL0L04312g						CAGL0L04312g	Constitutively expressed
							CAGL0L04378g						CAGL0L04378g	Constitutively expressed
							CAGL0L04510g						CAGL0L04510g	Constitutively expressed
							CAGL0L04532g						CAGL0L04532g	Constitutively expressed
							CAGL0L04598g						CAGL0L04598g	Constitutively expressed
							CAGL0L04664g						CAGL0L04664g	Constitutively expressed
							CAGL0L04708g						CAGL0L04708g	Constitutively expressed
							CAGL0L04796g						CAGL0L04796g	Constitutively expressed
							CAGL0L04840g						CAGL0L04840g	Constitutively expressed
							CAGL0L05148g						CAGL0L05148g	Constitutively expressed
							CAGL0L05170g						CAGL0L05170g	Constitutively expressed
							CAGL0L05236g						CAGL0L05236g	Constitutively expressed
							CAGL0L05258g						CAGL0L05258g	Constitutively expressed
							CAGL0L05390g						CAGL0L05390g	Constitutively expressed
							CAGL0L05412g						CAGL0L05412g	Constitutively expressed
							CAGL0L05434g						CAGL0L05434g	Constitutively expressed
							CAGL0L05456g						CAGL0L05456g	Constitutively expressed
							CAGL0L05478g						CAGL0L05478g	Constitutively expressed
							CAGL0L05500g						CAGL0L05500g	Constitutively expressed
							CAGL0L05676g						CAGL0L05676g	Constitutively expressed
							CAGL0L05742g						CAGL0L05742g	Constitutively expressed
							CAGL0L06094g						CAGL0L06094g	Constitutively expressed
							CAGL0L06138g						CAGL0L06138g	Constitutively expressed
							CAGL0L06160g						CAGL0L06160g	Constitutively expressed
							CAGL0L06204g						CAGL0L06204g	Constitutively expressed
							CAGL0L06248g						CAGL0L06248g	Constitutively expressed
							CAGL0L06270g						CAGL0L06270g	Constitutively expressed
							CAGL0L06424g						CAGL0L06424g	Constitutively expressed
							CAGL0L06490g						CAGL0L06490g	Constitutively expressed
							CAGL0L06534g						CAGL0L06534g	Constitutively expressed
							CAGL0L06600g						CAGL0L06600g	Constitutively expressed
							CAGL0L06666g						CAGL0L06666g	Constitutively expressed
							CAGL0L06732g						CAGL0L06732g	Constitutively expressed
							CAGL0L06754g						CAGL0L06754g	Constitutively expressed
							CAGL0L06798g						CAGL0L06798g	Constitutively expressed
							CAGL0L06820g						CAGL0L06820g	Constitutively expressed
							CAGL0L06886g						CAGL0L06886g	Constitutively expressed
							CAGL0L06908g						CAGL0L06908g	Constitutively expressed
							CAGL0L06952g						CAGL0L06952g	Constitutively expressed
							CAGL0L06974g						CAGL0L06974g	Constitutively expressed
							CAGL0L07436g						CAGL0L07436g	Constitutively expressed
							CAGL0L07480g						CAGL0L07480g	Constitutively expressed
							CAGL0L07502g						CAGL0L07502g	Constitutively expressed
							CAGL0L07546g						CAGL0L07546g	Constitutively expressed
							CAGL0L07722g						CAGL0L07722g	Constitutively expressed
							CAGL0L07744g						CAGL0L07744g	Constitutively expressed
							CAGL0L07810g						CAGL0L07810g	Constitutively expressed
							CAGL0L08008g						CAGL0L08008g	Constitutively expressed
							CAGL0L08110g						CAGL0L08110g	Constitutively expressed
							CAGL0L08114g						CAGL0L08114g	Constitutively expressed
							CAGL0L08118g						CAGL0L08118g	Constitutively expressed
							CAGL0L08294g						CAGL0L08294g	Constitutively expressed
							CAGL0L08426g						CAGL0L08426g	Constitutively expressed
							CAGL0L08448g						CAGL0L08448g	Constitutively expressed
							CAGL0L08481g						CAGL0L08481g	Constitutively expressed
							CAGL0L08712g						CAGL0L08712g	Constitutively expressed
							CAGL0L08932g						CAGL0L08932g	Constitutively expressed
							CAGL0L09108g						CAGL0L09108g	Constitutively expressed
							CAGL0L09251g						CAGL0L09251g	Constitutively expressed
							CAGL0L09383g						CAGL0L09383g	Constitutively expressed
							CAGL0L09581g						CAGL0L09581g	Constitutively expressed
							CAGL0L09625g						CAGL0L09625g	Constitutively expressed
							CAGL0L09713g						CAGL0L09713g	Constitutively expressed
							CAGL0L09801g						CAGL0L09801g	Constitutively expressed
							CAGL0L09911g						CAGL0L09911g	Constitutively expressed
							CAGL0L09933g						CAGL0L09933g	Constitutively expressed
							CAGL0L09955g						CAGL0L09955g	Constitutively expressed
							CAGL0L10015g						CAGL0L10015g	Constitutively expressed
							CAGL0L10043g						CAGL0L10043g	Constitutively expressed
							CAGL0L10092g						CAGL0L10092g	Constitutively expressed
							CAGL0L10186g						CAGL0L10186g	Constitutively expressed
							CAGL0L10208g						CAGL0L10208g	Constitutively expressed
							CAGL0L10362g						CAGL0L10362g	Constitutively expressed
							CAGL0L10406g						CAGL0L10406g	Constitutively expressed
							CAGL0L10560g						CAGL0L10560g	Constitutively expressed
							CAGL0L10648g						CAGL0L10648g	Constitutively expressed
							CAGL0L10714g						CAGL0L10714g	Constitutively expressed
							CAGL0L10758g						CAGL0L10758g	Constitutively expressed
							CAGL0L10780g						CAGL0L10780g	Constitutively expressed
							CAGL0L10868g						CAGL0L10868g	Constitutively expressed
							CAGL0L10978g						CAGL0L10978g	Constitutively expressed
							CAGL0L11132g						CAGL0L11132g	Constitutively expressed
							CAGL0L11462g						CAGL0L11462g	Constitutively expressed
							CAGL0L11484g						CAGL0L11484g	Constitutively expressed
							CAGL0L11792g						CAGL0L11792g	Constitutively expressed
							CAGL0L11836g						CAGL0L11836g	Constitutively expressed
							CAGL0L11880g						CAGL0L11880g	Constitutively expressed
							CAGL0L11990g						CAGL0L11990g	Constitutively expressed
							CAGL0L12056g						CAGL0L12056g	Constitutively expressed
							CAGL0L12078g						CAGL0L12078g	Constitutively expressed
							CAGL0L12254g						CAGL0L12254g	Constitutively expressed
							CAGL0L12298g						CAGL0L12298g	Constitutively expressed
							CAGL0L12320g						CAGL0L12320g	Constitutively expressed
							CAGL0L12364g						CAGL0L12364g	Constitutively expressed
							CAGL0L12452g						CAGL0L12452g	Constitutively expressed
							CAGL0L12474g						CAGL0L12474g	Constitutively expressed
							CAGL0L12540g						CAGL0L12540g	Constitutively expressed
							CAGL0L12760g						CAGL0L12760g	Constitutively expressed
							CAGL0L12782g						CAGL0L12782g	Constitutively expressed
							CAGL0L12870g						CAGL0L12870g	Constitutively expressed
							CAGL0L12892g						CAGL0L12892g	Constitutively expressed
							CAGL0L12914g						CAGL0L12914g	Constitutively expressed
							CAGL0L12936g						CAGL0L12936g	Constitutively expressed
							CAGL0L13200g						CAGL0L13200g	Constitutively expressed
							CAGL0L13222g						CAGL0L13222g	Constitutively expressed
							CAGL0L13299g						CAGL0L13299g	Constitutively expressed
							CAGL0L13332g						CAGL0L13332g	Constitutively expressed
							CAGL0L13376g						CAGL0L13376g	Constitutively expressed
							CAGL0L13392g						CAGL0L13392g	Constitutively expressed
							CAGL0L13431g						CAGL0L13431g	Constitutively expressed
							CAGL0M00638g						CAGL0M00638g	Constitutively expressed
							CAGL0M00660g						CAGL0M00660g	Constitutively expressed
							CAGL0M00814g						CAGL0M00814g	Constitutively expressed
							CAGL0M00874g						CAGL0M00874g	Constitutively expressed
							CAGL0M00880g						CAGL0M00880g	Constitutively expressed
							CAGL0M00902g						CAGL0M00902g	Constitutively expressed
							CAGL0M01364g						CAGL0M01364g	Constitutively expressed
							CAGL0M01474g						CAGL0M01474g	Constitutively expressed
							CAGL0M01562g						CAGL0M01562g	Constitutively expressed
							CAGL0M01628g						CAGL0M01628g	Constitutively expressed
							CAGL0M01650g						CAGL0M01650g	Constitutively expressed
							CAGL0M01804g						CAGL0M01804g	Constitutively expressed
							CAGL0M01826g						CAGL0M01826g	Constitutively expressed
							CAGL0M01848g						CAGL0M01848g	Constitutively expressed
							CAGL0M02101g						CAGL0M02101g	Constitutively expressed
							CAGL0M02123g						CAGL0M02123g	Constitutively expressed
							CAGL0M02167g						CAGL0M02167g	Constitutively expressed
							CAGL0M02211g						CAGL0M02211g	Constitutively expressed
							CAGL0M02365g						CAGL0M02365g	Constitutively expressed
							CAGL0M02497g						CAGL0M02497g	Constitutively expressed
							CAGL0M02629g						CAGL0M02629g	Constitutively expressed
							CAGL0M02673g						CAGL0M02673g	Constitutively expressed
							CAGL0M02695g						CAGL0M02695g	Constitutively expressed
							CAGL0M02849g						CAGL0M02849g	Constitutively expressed
							CAGL0M02937g						CAGL0M02937g	Constitutively expressed
							CAGL0M03377g						CAGL0M03377g	Constitutively expressed
							CAGL0M03465g						CAGL0M03465g	Constitutively expressed
							CAGL0M03487g						CAGL0M03487g	Constitutively expressed
							CAGL0M03553g						CAGL0M03553g	Constitutively expressed
							CAGL0M03575g						CAGL0M03575g	Constitutively expressed
							CAGL0M03773g						CAGL0M03773g	Constitutively expressed
							CAGL0M03839g						CAGL0M03839g	Constitutively expressed
							CAGL0M03861g						CAGL0M03861g	Constitutively expressed
							CAGL0M03883g						CAGL0M03883g	Constitutively expressed
							CAGL0M04169g						CAGL0M04169g	Constitutively expressed
							CAGL0M04191g						CAGL0M04191g	Constitutively expressed
							CAGL0M04213g						CAGL0M04213g	Constitutively expressed
							CAGL0M04477g						CAGL0M04477g	Constitutively expressed
							CAGL0M04675g						CAGL0M04675g	Constitutively expressed
							CAGL0M04807g						CAGL0M04807g	Constitutively expressed
							CAGL0M04873g						CAGL0M04873g	Constitutively expressed
							CAGL0M04983g						CAGL0M04983g	Constitutively expressed
							CAGL0M05005g						CAGL0M05005g	Constitutively expressed
							CAGL0M05181g						CAGL0M05181g	Constitutively expressed
							CAGL0M05379g						CAGL0M05379g	Constitutively expressed
							CAGL0M05401g						CAGL0M05401g	Constitutively expressed
							CAGL0M05423g						CAGL0M05423g	Constitutively expressed
							CAGL0M05511g						CAGL0M05511g	Constitutively expressed
							CAGL0M05593g						CAGL0M05593g	Constitutively expressed
							CAGL0M05599g						CAGL0M05599g	Constitutively expressed
							CAGL0M05665g						CAGL0M05665g	Constitutively expressed
							CAGL0M05951g						CAGL0M05951g	Constitutively expressed
							CAGL0M05995g						CAGL0M05995g	Constitutively expressed
							CAGL0M06083g						CAGL0M06083g	Constitutively expressed
							CAGL0M06171g						CAGL0M06171g	Constitutively expressed
							CAGL0M06303g						CAGL0M06303g	Constitutively expressed
							CAGL0M06347g						CAGL0M06347g	Constitutively expressed
							CAGL0M06457g						CAGL0M06457g	Constitutively expressed
							CAGL0M06479g						CAGL0M06479g	Constitutively expressed
							CAGL0M06501g						CAGL0M06501g	Constitutively expressed
							CAGL0M06523g						CAGL0M06523g	Constitutively expressed
							CAGL0M06633g						CAGL0M06633g	Constitutively expressed
							CAGL0M06655g						CAGL0M06655g	Constitutively expressed
							CAGL0M06677g						CAGL0M06677g	Constitutively expressed
							CAGL0M07029g						CAGL0M07029g	Constitutively expressed
							CAGL0M07073g						CAGL0M07073g	Constitutively expressed
							CAGL0M07161g						CAGL0M07161g	Constitutively expressed
							CAGL0M07205g						CAGL0M07205g	Constitutively expressed
							CAGL0M07315g						CAGL0M07315g	Constitutively expressed
							CAGL0M07337g						CAGL0M07337g	Constitutively expressed
							CAGL0M07381g						CAGL0M07381g	Constitutively expressed
							CAGL0M07513g						CAGL0M07513g	Constitutively expressed
							CAGL0M07612g						CAGL0M07612g	Constitutively expressed
							CAGL0M07634g						CAGL0M07634g	Constitutively expressed
							CAGL0M07656g						CAGL0M07656g	Constitutively expressed
							CAGL0M07920g						CAGL0M07920g	Constitutively expressed
							CAGL0M07942g						CAGL0M07942g	Constitutively expressed
							CAGL0M08118g						CAGL0M08118g	Constitutively expressed
							CAGL0M08206g						CAGL0M08206g	Constitutively expressed
							CAGL0M08382g						CAGL0M08382g	Constitutively expressed
							CAGL0M08492g						CAGL0M08492g	Constitutively expressed
							CAGL0M08514g						CAGL0M08514g	Constitutively expressed
							CAGL0M08536g						CAGL0M08536g	Constitutively expressed
							CAGL0M08552g						CAGL0M08552g	Constitutively expressed
							CAGL0M08602g						CAGL0M08602g	Constitutively expressed
							CAGL0M08624g						CAGL0M08624g	Constitutively expressed
							CAGL0M08646g						CAGL0M08646g	Constitutively expressed
							CAGL0M08734g						CAGL0M08734g	Constitutively expressed
							CAGL0M08800g						CAGL0M08800g	Constitutively expressed
							CAGL0M08910g						CAGL0M08910g	Constitutively expressed
							CAGL0M08932g						CAGL0M08932g	Constitutively expressed
							CAGL0M09020g						CAGL0M09020g	Constitutively expressed
							CAGL0M09185g						CAGL0M09185g	Constitutively expressed
							CAGL0M09207g						CAGL0M09207g	Constitutively expressed
							CAGL0M09229g						CAGL0M09229g	Constitutively expressed
							CAGL0M09273g						CAGL0M09273g	Constitutively expressed
							CAGL0M09295g						CAGL0M09295g	Constitutively expressed
							CAGL0M09471g						CAGL0M09471g	Constitutively expressed
							CAGL0M09515g						CAGL0M09515g	Constitutively expressed
							CAGL0M09581g						CAGL0M09581g	Constitutively expressed
							CAGL0M09603g						CAGL0M09603g	Constitutively expressed
							CAGL0M09779g						CAGL0M09779g	Constitutively expressed
							CAGL0M09955g						CAGL0M09955g	Constitutively expressed
							CAGL0M10087g						CAGL0M10087g	Constitutively expressed
							CAGL0M10235g						CAGL0M10235g	Constitutively expressed
							CAGL0M10241g						CAGL0M10241g	Constitutively expressed
							CAGL0M10417g						CAGL0M10417g	Constitutively expressed
							CAGL0M10439g						CAGL0M10439g	Constitutively expressed
							CAGL0M10549g						CAGL0M10549g	Constitutively expressed
							CAGL0M10571g						CAGL0M10571g	Constitutively expressed
							CAGL0M10615g						CAGL0M10615g	Constitutively expressed
							CAGL0M10890g						CAGL0M10890g	Constitutively expressed
							CAGL0M10956g						CAGL0M10956g	Constitutively expressed
							CAGL0M11000g						CAGL0M11000g	Constitutively expressed
							CAGL0M11104g						CAGL0M11104g	Constitutively expressed
							CAGL0M11110g						CAGL0M11110g	Constitutively expressed
							CAGL0M11462g						CAGL0M11462g	Constitutively expressed
							CAGL0M11473g						CAGL0M11473g	Constitutively expressed
							CAGL0M11484g						CAGL0M11484g	Constitutively expressed
							CAGL0M11572g						CAGL0M11572g	Constitutively expressed
							CAGL0M11660g						CAGL0M11660g	Constitutively expressed
							CAGL0M11704g						CAGL0M11704g	Constitutively expressed
							CAGL0M11726g						CAGL0M11726g	Constitutively expressed
							CAGL0M11748g						CAGL0M11748g	Constitutively expressed
							CAGL0M11902g						CAGL0M11902g	Constitutively expressed
							CAGL0M11946g						CAGL0M11946g	Constitutively expressed
							CAGL0M11990g						CAGL0M11990g	Constitutively expressed
							CAGL0M12034g						CAGL0M12034g	Constitutively expressed
							CAGL0M12122g						CAGL0M12122g	Constitutively expressed
							CAGL0M12188g						CAGL0M12188g	Constitutively expressed
							CAGL0M12320g						CAGL0M12320g	Constitutively expressed
							CAGL0M12386g						CAGL0M12386g	Constitutively expressed
							CAGL0M12408g						CAGL0M12408g	Constitutively expressed
							CAGL0M12430g						CAGL0M12430g	Constitutively expressed
							CAGL0M12474g						CAGL0M12474g	Constitutively expressed
							CAGL0M12496g						CAGL0M12496g	Constitutively expressed
							CAGL0M12551g						CAGL0M12551g	Constitutively expressed
							CAGL0M12573g						CAGL0M12573g	Constitutively expressed
							CAGL0M12595g						CAGL0M12595g	Constitutively expressed
							CAGL0M12705g						CAGL0M12705g	Constitutively expressed
							CAGL0M12837g						CAGL0M12837g	Constitutively expressed
							CAGL0M12881g						CAGL0M12881g	Constitutively expressed
							CAGL0M12925g						CAGL0M12925g	Constitutively expressed
							CAGL0M13035g						CAGL0M13035g	Constitutively expressed
							CAGL0M13057g						CAGL0M13057g	Constitutively expressed
							CAGL0M13079g						CAGL0M13079g	Constitutively expressed
							CAGL0M13101g						CAGL0M13101g	Constitutively expressed
							CAGL0M13189g						CAGL0M13189g	Constitutively expressed
							CAGL0M13255g						CAGL0M13255g	Constitutively expressed
							CAGL0M13277g						CAGL0M13277g	Constitutively expressed
							CAGL0M13321g						CAGL0M13321g	Constitutively expressed
							CAGL0M13343g						CAGL0M13343g	Constitutively expressed
							CAGL0M13629g						CAGL0M13629g	Constitutively expressed
							CAGL0M13651g						CAGL0M13651g	Constitutively expressed
							CAGL0M13717g						CAGL0M13717g	Constitutively expressed
							CAGL0M13805g						CAGL0M13805g	Constitutively expressed
							CAGL0M13849g						CAGL0M13849g	Constitutively expressed
							CAGL0M13893g						CAGL0M13893g	Constitutively expressed
							CAGL0M13937g						CAGL0M13937g	Constitutively expressed
							CAGL0M14003g						CAGL0M14003g	Constitutively expressed
							CAGL0M14025g						CAGL0M14025g	Constitutively expressed
													CAGL0K12518g	Constitutively expressed
													CAGL0M06963g	Constitutively expressed
													CAGL0M00198g	Constitutively expressed
													CAGL0E01567g	Constitutively expressed
													CAGL0D02046g	Constitutively expressed
													CAGL0L02167g	Constitutively expressed
													CAGL0L09339g	Constitutively expressed
													CAGL0M09911g	Constitutively expressed
													CAGL0D06380g	Constitutively expressed
													CAGL0H03971g	Constitutively expressed
													CAGL0I06831g	Constitutively expressed
													CAGL0I00264g	Constitutively expressed
													CAGL0E06644g	Constitutively expressed
													CAGL0I09086g	Constitutively expressed
													CAGL0J08547g	Constitutively expressed
													CAGL0K08954g	Constitutively expressed
													CAGL0L11088g	Constitutively expressed
													CAGL0I08833g	Constitutively expressed
													CAGL0I05720g	Constitutively expressed
													CAGL0D02134g	Constitutively expressed
													CAGL0F07491g	Constitutively expressed
													CAGL0B02970g	Constitutively expressed
													CAGL0K04543g	Constitutively expressed
													CAGL0I09394g	Constitutively expressed
													CAGL0J00385g	Constitutively expressed
													CAGL0F08503g	Constitutively expressed
													CAGL0G08646g	Constitutively expressed
													CAGL0K04103g	Constitutively expressed
													CAGL0K00825g	Constitutively expressed
													CAGL0K05203g	Constitutively expressed
													CAGL0G06754g	Constitutively expressed
													CAGL0H09460g	Constitutively expressed
													CAGL0G03179g	Constitutively expressed
													CAGL0K01903g	Constitutively expressed
													CAGL0H05423g	Constitutively expressed
													CAGL0I09658g	Constitutively expressed
													CAGL0B01529g	Constitutively expressed
													CAGL0M10065g	Constitutively expressed
													CAGL0G02409g	Constitutively expressed
													CAGL0M01716g	Constitutively expressed
													CAGL0H02717g	Constitutively expressed
													CAGL0L11902g	Constitutively expressed
													CAGL0L10164g	Constitutively expressed
													CAGL0J09790g	Constitutively expressed
													CAGL0M00374g	Constitutively expressed
													CAGL0F08987g	Constitutively expressed
													CAGL0K08426g	Constitutively expressed
													CAGL0K07315g	Constitutively expressed
													CAGL0D01716g	Constitutively expressed
													CAGL0A00429g	Constitutively expressed
													CAGL0I09724g	Constitutively expressed
													CAGL0D02728g	Constitutively expressed
													CAGL0F04477g	Constitutively expressed
													CAGL0I00308g	Constitutively expressed
													CAGL0E03762g	Constitutively expressed
													CAGL0J05082g	Constitutively expressed
													CAGL0K07678g	Constitutively expressed
													CAGL0K04895g	Constitutively expressed
													CAGL0E05258g	Constitutively expressed
													CAGL0M08558g	Constitutively expressed
													CAGL0L05626g	Constitutively expressed
													CAGL0H07667g	Constitutively expressed
													CAGL0I06457g	Constitutively expressed
													CAGL0K04785g	Constitutively expressed
													CAGL0K09592g	Constitutively expressed
													CAGL0G03927g	Constitutively expressed
													CAGL0J08272g	Constitutively expressed
													CAGL0B02255g	Constitutively expressed
