# Supplementary material for: Temporal transcriptional response of Candida glabrata during macrophage infection reveals a multifaceted transcriptional regulator CgXbp1 important for macrophage response and fluconazole resistance
Source: eLife. 2024 Oct 2;13:e73832. doi: 10.7554/eLife.73832 (PMC11554308; doi:10.7554/eLife.73832)
Supplement: Supplementary file 2. [file elife-73832-supp2.xlsx]

## Sheet: Group 1
Supplementary file 2: List of GO-terms enriched from temporally induced genes in wildtype C. glabrata in response to macrophage infection
	GO-Term enrichment employing Candida genome database
GOID	GO_term	Corrected P-value	Cluster frequency	Background frequency	False discovery rate	Gene(s) annotated to the term	Directly Annotated GOID List
22610	biological adhesion	0.0082	6 out of 181 genes, 3.3%	18 out of 5615 background genes, 0.3%	0	EPA1:CAGL0I07293g:PWP7:EPA11:EPA13:SNF1	6986:44406:6468:1302:1904262:71940:7155:34976:1403:36164:90606:6995:128:2000222:1900436:7232:45722:36279:5993:132:16239:17148
7155	cell adhesion	0.06367	5 out of 181 genes, 2.8%	16 out of 5615 background genes, 0.3%	0.0533	EPA1:CAGL0I07293g:EPA11:EPA13:SNF1	6986:44406:6468:1302:1904262:71940:7155:34976:1403:36164:90606:6995:128:2000222:7232:1900436:45722:36279:5993:132:16239:17148
	GO-Term enrichment employing FungiDB database
ID	Name	P-value	Bgd count	Result count	Result gene list	Pct of bgd	Fold enrichment	Odds ratio	Benjamini	Bonferroni
GO:0034440	lipid oxidation	0.000473066	12	4	CAGL0A03740g,CAGL0D02618g,CAGL0H06787g,CAGL0L02167g,	33.3	10.03	14.86	0.269789	0.64337
GO:0071280	cellular response to copper ion	0.00120625	15	4	CAGL0E00561g,CAGL0H04257g,CAGL0H04279g,CAGL0J04400g,	26.7	8.03	10.8	0.269789	1
GO:0022610	biological adhesion	0.0119457	58	6	CAGL0E00561g,CAGL0E06644g,CAGL0G06754g,CAGL0I10098g,CAGL0K02277g,CAGL0M08910g,	10.3	3.11	3.44	0.7194	1
GO:1901699	cellular response to nitrogen compound	0.0146784	16	3	CAGL0L02211g,CAGL0L03157g,CAGL0L06666g,	18.8	5.64	6.81	0.7194	1
GO:0042773	ATP synthesis coupled electron transport	0.0308863	21	3	CAGL0D05192g,CAGL0I01408g,CAGL0L10406g,	14.3	4.3	4.92	0.7194	1
GO:0036279	positive regulation of protein export from nucleus in response to glucose starvation	0.0332264	1	1	CAGL0M08910g,	100	30.1	inf	0.7194	1
GO:0019395	fatty acid oxidation	0.000473066	12	4	CAGL0A03740g,CAGL0D02618g,CAGL0H06787g,CAGL0L02167g,	33.3	10.03	14.86	0.269789	0.64337
GO:0043385	mycotoxin metabolic process	0.00178537	8	3	CAGL0E00561g,CAGL0L06666g,CAGL0M09207g,	37.5	11.29	17.74	0.269789	1
GO:0043386	mycotoxin biosynthetic process	0.00178537	8	3	CAGL0E00561g,CAGL0L06666g,CAGL0M09207g,	37.5	11.29	17.74	0.269789	1
GO:0045461	sterigmatocystin biosynthetic process	0.00178537	8	3	CAGL0E00561g,CAGL0L06666g,CAGL0M09207g,	37.5	11.29	17.74	0.269789	1
GO:0045460	sterigmatocystin metabolic process	0.00178537	8	3	CAGL0E00561g,CAGL0L06666g,CAGL0M09207g,	37.5	11.29	17.74	0.269789	1
GO:1901376	organic heteropentacyclic compound metabolic process	0.00178537	8	3	CAGL0E00561g,CAGL0L06666g,CAGL0M09207g,	37.5	11.29	17.74	0.269789	1
GO:1901378	organic heteropentacyclic compound biosynthetic process	0.00178537	8	3	CAGL0E00561g,CAGL0L06666g,CAGL0M09207g,	37.5	11.29	17.74	0.269789	1
GO:0046688	response to copper ion	0.0019965	17	4	CAGL0E00561g,CAGL0H04257g,CAGL0H04279g,CAGL0J04400g,	23.5	7.08	9.14	0.271524	1
GO:0071292	cellular response to silver ion	0.00322162	3	2	CAGL0H04257g,CAGL0H04279g,	66.7	20.06	58.85	0.30958	1
GO:0032516	positive regulation of phosphoprotein phosphatase activity	0.00322162	3	2	CAGL0G06094g,CAGL0K05423g,	66.7	20.06	58.85	0.30958	1
GO:0010272	response to silver ion	0.00322162	3	2	CAGL0H04257g,CAGL0H04279g,	66.7	20.06	58.85	0.30958	1
GO:0009404	toxin metabolic process	0.00364212	10	3	CAGL0E00561g,CAGL0L06666g,CAGL0M09207g,	30	9.03	12.67	0.30958	1
GO:0006122	mitochondrial electron transport, ubiquinol to cytochrome c	0.00364212	10	3	CAGL0D05192g,CAGL0I01408g,CAGL0L10406g,	30	9.03	12.67	0.30958	1
GO:0009403	toxin biosynthetic process	0.00364212	10	3	CAGL0E00561g,CAGL0L06666g,CAGL0M09207g,	30	9.03	12.67	0.30958	1
GO:0006635	fatty acid beta-oxidation	0.00488651	11	3	CAGL0A03740g,CAGL0H06787g,CAGL0L02167g,	27.3	8.21	11.08	0.390921	1
GO:0000128	flocculation	0.00635766	12	3	CAGL0I07293g,CAGL0L13299g,CAGL0L13332g,	25	7.52	9.85	0.480356	1
GO:0010914	positive regulation of sterigmatocystin biosynthetic process	0.0102752	5	2	CAGL0E00561g,CAGL0M09207g,	40	12.04	19.61	0.7194	1
GO:0006631	fatty acid metabolic process	0.011005	57	6	CAGL0A03740g,CAGL0B01529g,CAGL0D02618g,CAGL0H06787g,CAGL0H09460g,CAGL0L02167g,	10.5	3.17	3.51	0.7194	1
GO:0098630	aggregation of unicellular organisms	0.01222	15	3	CAGL0I07293g,CAGL0L13299g,CAGL0L13332g,	20	6.02	7.38	0.7194	1
GO:0098743	cell aggregation	0.01222	15	3	CAGL0I07293g,CAGL0L13299g,CAGL0L13332g,	20	6.02	7.38	0.7194	1
GO:0001676	long-chain fatty acid metabolic process	0.0150779	6	2	CAGL0A03740g,CAGL0H09460g,	33.3	10.03	14.7	0.7194	1
GO:0035307	positive regulation of protein dephosphorylation	0.0150779	6	2	CAGL0G06094g,CAGL0K05423g,	33.3	10.03	14.7	0.7194	1
GO:0030258	lipid modification	0.0183914	31	4	CAGL0A03740g,CAGL0D02618g,CAGL0H06787g,CAGL0L02167g,	12.9	3.88	4.39	0.7194	1
GO:0044550	secondary metabolite biosynthetic process	0.0203749	18	3	CAGL0E00561g,CAGL0L06666g,CAGL0M09207g,	16.7	5.02	5.9	0.7194	1
GO:0019748	secondary metabolic process	0.0203749	18	3	CAGL0E00561g,CAGL0L06666g,CAGL0M09207g,	16.7	5.02	5.9	0.7194	1
GO:0016574	histone ubiquitination	0.0206515	7	2	CAGL0L05412g,CAGL0M07337g,	28.6	8.6	11.76	0.7194	1
GO:1900378	positive regulation of secondary metabolite biosynthetic process	0.0206515	7	2	CAGL0E00561g,CAGL0M09207g,	28.6	8.6	11.76	0.7194	1
GO:0009062	fatty acid catabolic process	0.0236164	19	3	CAGL0A03740g,CAGL0H06787g,CAGL0L02167g,	15.8	4.75	5.53	0.7194	1
GO:0010913	regulation of sterigmatocystin biosynthetic process	0.0269402	8	2	CAGL0E00561g,CAGL0M09207g,	25	7.52	9.8	0.7194	1
GO:0055088	lipid homeostasis	0.0308863	21	3	CAGL0C02739g,CAGL0J04004g,CAGL0L02211g,	14.3	4.3	4.92	0.7194	1
GO:0042775	mitochondrial ATP synthesis coupled electron transport	0.0308863	21	3	CAGL0D05192g,CAGL0I01408g,CAGL0L10406g,	14.3	4.3	4.92	0.7194	1
GO:0071241	cellular response to inorganic substance	0.0325503	54	5	CAGL0E00561g,CAGL0G01540g,CAGL0H04257g,CAGL0H04279g,CAGL0J04400g,	9.3	2.79	3.03	0.7194	1
GO:0001919	regulation of receptor recycling	0.0332264	1	1	CAGL0L02211g,	100	30.1	inf	0.7194	1
GO:0070458	cellular detoxification of nitrogen compound	0.0332264	1	1	CAGL0L06666g,	100	30.1	inf	0.7194	1
GO:0007040	lysosome organization	0.0332264	1	1	CAGL0L02211g,	100	30.1	inf	0.7194	1
GO:0046210	nitric oxide catabolic process	0.0332264	1	1	CAGL0L06666g,	100	30.1	inf	0.7194	1
GO:0032973	amino acid export across plasma membrane	0.0332264	1	1	CAGL0J09944g,	100	30.1	inf	0.7194	1
GO:0006142	regulation of pyrimidine nucleobase metabolic process	0.0332264	1	1	CAGL0L05676g,	100	30.1	inf	0.7194	1
GO:0080171	lytic vacuole organization	0.0332264	1	1	CAGL0L02211g,	100	30.1	inf	0.7194	1
GO:0002939	tRNA N1-guanine methylation	0.0332264	1	1	CAGL0I07667g,	100	30.1	inf	0.7194	1
GO:1901642	nucleoside transmembrane transport	0.0332264	1	1	CAGL0J08712g,	100	30.1	inf	0.7194	1
GO:1905117	regulation of ribonucleoside-diphosphate reductase activity	0.0332264	1	1	CAGL0L11132g,	100	30.1	inf	0.7194	1
GO:1905184	positive regulation of protein serine/threonine phosphatase activity	0.0332264	1	1	CAGL0G06094g,	100	30.1	inf	0.7194	1
GO:0019654	acetate fermentation	0.0332264	1	1	CAGL0L00649g,	100	30.1	inf	0.7194	1
GO:0042760	very long-chain fatty acid catabolic process	0.0332264	1	1	CAGL0L02167g,	100	30.1	inf	0.7194	1
GO:0046209	nitric oxide metabolic process	0.0332264	1	1	CAGL0L06666g,	100	30.1	inf	0.7194	1
GO:0046711	GDP biosynthetic process	0.0332264	1	1	CAGL0K06281g,	100	30.1	inf	0.7194	1
GO:0046710	GDP metabolic process	0.0332264	1	1	CAGL0K06281g,	100	30.1	inf	0.7194	1
GO:0045984	negative regulation of pyrimidine nucleobase metabolic process	0.0332264	1	1	CAGL0L05676g,	100	30.1	inf	0.7194	1
GO:0042632	cholesterol homeostasis	0.0332264	1	1	CAGL0L02211g,	100	30.1	inf	0.7194	1
GO:2001057	reactive nitrogen species metabolic process	0.0332264	1	1	CAGL0L06666g,	100	30.1	inf	0.7194	1
GO:0043156	chromatin remodeling in response to cation stress	0.0332264	1	1	CAGL0E00561g,	100	30.1	inf	0.7194	1
GO:0061158	3'-UTR-mediated mRNA destabilization	0.0332264	1	1	CAGL0K06655g,	100	30.1	inf	0.7194	1
GO:0034258	nicotinamide riboside transport	0.0332264	1	1	CAGL0J08712g,	100	30.1	inf	0.7194	1
GO:0051410	detoxification of nitrogen compound	0.0332264	1	1	CAGL0L06666g,	100	30.1	inf	0.7194	1
GO:0042758	long-chain fatty acid catabolic process	0.0332264	1	1	CAGL0A03740g,	100	30.1	inf	0.7194	1
GO:0010922	positive regulation of phosphatase activity	0.0338909	9	2	CAGL0G06094g,CAGL0K05423g,	22.2	6.69	8.4	0.7194	1
GO:0071236	cellular response to antibiotic	0.0349121	22	3	CAGL0E00561g,CAGL0J09944g,CAGL0K10868g,	13.6	4.1	4.66	0.7194	1
GO:0022904	respiratory electron transport chain	0.0349121	22	3	CAGL0D05192g,CAGL0I01408g,CAGL0L10406g,	13.6	4.1	4.66	0.7194	1
GO:0006119	oxidative phosphorylation	0.0349121	22	3	CAGL0D05192g,CAGL0I01408g,CAGL0L10406g,	13.6	4.1	4.66	0.7194	1
GO:0055074	calcium ion homeostasis	0.0391952	23	3	CAGL0J04158g,CAGL0J09306g,CAGL0M12320g,	13	3.93	4.42	0.738599	1
GO:0022900	electron transport chain	0.0391952	23	3	CAGL0D05192g,CAGL0I01408g,CAGL0L10406g,	13	3.93	4.42	0.738599	1
GO:0009065	glutamine family amino acid catabolic process	0.0414531	10	2	CAGL0L05676g,CAGL0M00880g,	20	6.02	7.35	0.738599	1
GO:0036166	phenotypic switching	0.0437323	24	3	CAGL0E00561g,CAGL0G01540g,CAGL0I03366g,	12.5	3.76	4.21	0.738599	1
GO:0042737	drug catabolic process	0.0437323	24	3	CAGL0K10868g,CAGL0L06666g,CAGL0M09779g,	12.5	3.76	4.21	0.738599	1

## Sheet: Group 2
Supplementary file 2: List of GO-terms enriched from temporally induced genes in wildtype C. glabrata in response to macrophage infection
	GO-Term enrichment employing Candida genome database
GOID	GO_term	Corrected P-value	Cluster frequency	Background frequency	False discovery rate	Gene(s) annotated to the term	Directly Annotated GOID List
46394	carboxylic acid biosynthetic process	1.17e-17	33 out of 171 genes, 19.3%	148 out of 5615 background genes, 2.6%	0	CAGL0A00363g:CAGL0A02574g:HIS4:CAGL0C01243g:LYS9:CAGL0D00528g:MET15:CAGL0E05016g:CAGL0F01749g:CAGL0F06875g:MET13:MTD1:LYS12:CAGL0G06732g:LEU2:CAGL0H05137g:CYS3:CAGL0I00418g:CAGL0I09284g:HOM3:CAGL0J06402g:CAGL0J08316g:LYS21:CAGL0K03465g:GLN1:CAGL0K07788g:CAGL0K12518g:HIS1:HIS3:STR3:CAGL0L10780g:CAGL0M00374g:CAGL0M12837g	9092:6636:6542:6535:162:9073:35999:6281:19878:9070:103:9097:19343:70791:19346:55114:9113:9088:45471:6553:1207:6807:6555:9085:6740:19413:97:9082:10045:19265:1:9396:19676:71470:6534:42759:71266:9099:9086:19264:1904828:96:105:71269:9098:9651:6730:70814:19344:9090:6633
1901607	alpha-amino acid biosynthetic process	3.19e-17	26 out of 171 genes, 15.2%	85 out of 5615 background genes, 1.5%	0	CAGL0A00363g:CAGL0A02574g:HIS4:CAGL0C01243g:LYS9:MET15:CAGL0F01749g:CAGL0F06875g:MET13:LYS12:CAGL0G06732g:LEU2:CYS3:CAGL0I09284g:HOM3:CAGL0J06402g:CAGL0J08316g:LYS21:CAGL0K03465g:GLN1:CAGL0K07788g:CAGL0K12518g:HIS1:HIS3:STR3:CAGL0M12837g	9092:6542:6535:162:35999:6281:19878:9070:9097:19343:70791:19346:55114:9088:6553:1207:6807:6555:9085:9082:10045:19265:19676:71470:6534:71266:9099:9086:19264:1904828:96:105:71269:9098:6730:19344:9090
6188	IMP biosynthetic process	1.26e-06	7 out of 171 genes, 4.1%	10 out of 5615 background genes, 0.2%	0	CAGL0A03366g:CAGL0B02794g:CAGL0H07887g:CAGL0I04444g:CAGL0K04499g:ADE2:CAGL0M13717g	9116:9152:9113:6188:6164:46084:6144:46083:6106:6189:44208
45333	cellular respiration	6.59e-06	14 out of 171 genes, 8.2%	69 out of 5615 background genes, 1.2%	0	CAGL0A01045g:CAGL0B02431g:CAGL0C01325g:ACO1:CAGL0E01287g:ACO2:IDH1:CAGL0G08712g:CAGL0G10153g:CAGL0H02491g:CAGL0H03993g:RIP1:CAGL0J00847g:CAGL0L06160g	9060:44262:6099:46356:6102:6116:6123:8152:6122:45333:6101:2:6120:32543:22900:43065:6103:6106
6099	tricarboxylic acid cycle	1.88e-05	8 out of 171 genes, 4.7%	19 out of 5615 background genes, 0.3%	0	CAGL0A01045g:ACO1:CAGL0E01287g:ACO2:IDH1:CAGL0G08712g:CAGL0H03993g:CAGL0J00847g	44262:6099:46356:6102:8152:45333:6101:2:32543:22900:6103:6106
6091	generation of precursor metabolites and energy	2.01e-05	18 out of 171 genes, 10.5%	127 out of 5615 background genes, 2.3%	0	CAGL0A01045g:CAGL0B02431g:CAGL0C01325g:ACO1:CAGL0E01287g:ACO2:IDH1:CAGL0G08712g:CAGL0G10153g:ATP2:CAGL0H02491g:CAGL0H02695g:CAGL0H03993g:CAGL0H05137g:CAGL0I00748g:RIP1:CAGL0J00847g:CAGL0L06160g	9060:44262:6099:46356:15986:6102:6116:5978:6123:8152:6740:19413:42981:6122:45333:6101:2:6120:32543:22900:19655:42776:43065:6103:6106:9651
9165	nucleotide biosynthetic process	0.00081	13 out of 171 genes, 7.6%	86 out of 5615 background genes, 1.5%	0	CAGL0A01023g:CAGL0A03366g:CAGL0B02794g:ATP2:CAGL0H05489g:CAGL0H07887g:CAGL0I04444g:CAGL0I04686g:CAGL0K04499g:ADE2:ATP7:ATP1:CAGL0M13717g	9116:9152:9435:15986:9113:6188:6164:46084:42776:65003:6144:46083:6106:6189:44208
22900	electron transport chain	0.00253	7 out of 171 genes, 4.1%	24 out of 5615 background genes, 0.4%	0	CAGL0B02431g:CAGL0C01325g:CAGL0G10153g:CAGL0H02491g:RIP1:CAGL0J00847g:CAGL0L06160g	9060:6099:6116:6123:6122:45333:6120:22900:43065
55085	transmembrane transport	0.00471	24 out of 171 genes, 14.0%	297 out of 5615 background genes, 5.3%	0	PHO84:CAGL0D02640g:CAGL0D02662g:CAGL0E01353g:CAGL0E05632g:CAGL0F00231g:CAGL0F08085g:ATP2:CAGL0H05489g:CAGL0I04686g:CAGL0I05918g:CAGL0I07689g:FCY2:MGE1:CAGL0J09790g:GPD1:CAGL0K04367g:CAGL0K07436g:CAGL0K11616g:CAGL0L02079g:TPN1:ATP7:CAGL0L10868g:ATP1	5975:6843:55085:6842:15986:1408:6116:34488:1903692:51180:15851:16558:34659:8272:15812:97080:30150:6072:1900062:101:2:15824:6828:6817:42776:35435:15804:42026:65003:6812:15742:6850:6973:71578:15729:46168:6797:6879:15856
44281	small molecule metabolic process	1.37e-21	66 out of 171 genes, 38.6%	559 out of 5615 background genes, 10.0%	0	CAGL0A00363g:CAGL0A01023g:CAGL0A01045g:CAGL0A02112g:CAGL0A02574g:CAGL0A03366g:HIS4:SAM1:PHO84:CAGL0B02794g:CAGL0B03663g:MET3:CAGL0B04917g:CAGL0C01243g:PHM8:LYS9:CAGL0D00528g:VIG9:FCY1:DOG2:CAGL0D04356g:MET15:CAGL0D06556g:CAGL0E01287g:CAGL0E05016g:CAGL0F01749g:CAGL0F06875g:MET13:MTD1:LYS12:IDH1:CAGL0G06732g:ATP2:LEU2:CAGL0H03993g:CAGL0H05137g:CAGL0H05489g:CYS3:CAGL0H07887g:CAGL0I00418g:CAGL0I04444…	6021:9092:32:9116:6006:8655:9152:6636:6542:6535:44262:162:9073:10134:35999:9435:6099:6281:46356:15986:9272:19878:9070:103:6102:9097:19343:70791:90549:19346:9166:6421:6486:55114:19858:6556:46087:70328:9113:19379:9088:45471:6553:1207:6546:19464:6807:97080:9085:6555:6740:19413:97:9082:1900062:6188:10045:6101:19265:1:9396:19676:9249:71470:6164:6534:6544:46084:42759:6828:6817:71266:42776:9298:6422:650…
43436	oxoacid metabolic process	1.93e-20	50 out of 171 genes, 29.2%	325 out of 5615 background genes, 5.8%	0	CAGL0A00363g:CAGL0A01045g:CAGL0A02112g:CAGL0A02574g:HIS4:SAM1:PHO84:CAGL0B02794g:CAGL0B03663g:MET3:CAGL0B04917g:CAGL0C01243g:LYS9:CAGL0D00528g:CAGL0D04356g:MET15:CAGL0D06556g:CAGL0E01287g:CAGL0E05016g:CAGL0F01749g:CAGL0F06875g:MET13:MTD1:LYS12:IDH1:CAGL0G06732g:LEU2:CAGL0H03993g:CAGL0H05137g:CYS3:CAGL0I00418g:CAGL0I04444g:CAGL0I09284g:HOM3:CAGL0J06402g:CAGL0J08316g:LYS21:CAGL0K03465g:GLN1:CAGL0K0…	9092:9152:6636:6542:6535:44262:162:9073:10134:35999:6099:6281:46356:19878:9070:103:6102:9097:19343:70791:19346:6421:55114:6556:9113:19379:9088:45471:6553:1207:6546:19464:6807:97080:9085:6555:6740:19413:97:9082:1900062:10045:6101:19265:1:9396:19676:9249:71470:6164:6534:6544:46084:42759:6828:6817:71266:6422:6103:9099:9086:19264:1904828:96:105:71269:6189:6797:6106:9098:9651:6730:70814:19344:9090:663…
6082	organic acid metabolic process	2.23e-20	50 out of 171 genes, 29.2%	326 out of 5615 background genes, 5.8%	0	CAGL0A00363g:CAGL0A01045g:CAGL0A02112g:CAGL0A02574g:HIS4:SAM1:PHO84:CAGL0B02794g:CAGL0B03663g:MET3:CAGL0B04917g:CAGL0C01243g:LYS9:CAGL0D00528g:CAGL0D04356g:MET15:CAGL0D06556g:CAGL0E01287g:CAGL0E05016g:CAGL0F01749g:CAGL0F06875g:MET13:MTD1:LYS12:IDH1:CAGL0G06732g:LEU2:CAGL0H03993g:CAGL0H05137g:CYS3:CAGL0I00418g:CAGL0I04444g:CAGL0I09284g:HOM3:CAGL0J06402g:CAGL0J08316g:LYS21:CAGL0K03465g:GLN1:CAGL0K0…	9092:9152:6636:6542:6535:44262:162:9073:10134:35999:6099:6281:46356:19878:9070:103:6102:9097:19343:70791:19346:6421:55114:6556:9113:19379:9088:45471:6553:1207:6546:19464:6807:97080:9085:6555:6740:19413:97:9082:1900062:10045:6101:19265:1:9396:19676:9249:71470:6164:6534:6544:46084:42759:6828:6817:71266:6422:6103:9099:9086:19264:1904828:96:105:71269:6189:6797:6106:9098:9651:6730:70814:19344:9090:663…
19752	carboxylic acid metabolic process	3.55e-20	49 out of 171 genes, 28.7%	315 out of 5615 background genes, 5.6%	0	CAGL0A00363g:CAGL0A01045g:CAGL0A02112g:CAGL0A02574g:HIS4:SAM1:CAGL0B02794g:CAGL0B03663g:MET3:CAGL0B04917g:CAGL0C01243g:LYS9:CAGL0D00528g:CAGL0D04356g:MET15:CAGL0D06556g:CAGL0E01287g:CAGL0E05016g:CAGL0F01749g:CAGL0F06875g:MET13:MTD1:LYS12:IDH1:CAGL0G06732g:LEU2:CAGL0H03993g:CAGL0H05137g:CYS3:CAGL0I00418g:CAGL0I04444g:CAGL0I09284g:HOM3:CAGL0J06402g:CAGL0J08316g:LYS21:CAGL0K03465g:GLN1:CAGL0K07788g:…	9092:9152:6636:6542:6535:44262:162:9073:10134:35999:6099:6281:46356:19878:9070:103:6102:9097:19343:70791:19346:6421:55114:6556:9113:19379:9088:45471:6553:1207:6546:19464:6807:9085:6555:6740:19413:97:9082:10045:6101:19265:1:9396:19676:9249:71470:6164:6534:6544:46084:42759:71266:6422:6103:9099:9086:19264:1904828:96:105:71269:6189:6106:9098:9651:6730:70814:19344:9090:6633:44208
1901605	alpha-amino acid metabolic process	2.51e-18	30 out of 171 genes, 17.5%	112 out of 5615 background genes, 2.0%	0	CAGL0A00363g:CAGL0A02574g:HIS4:SAM1:CAGL0C01243g:LYS9:CAGL0D04356g:MET15:CAGL0F01749g:CAGL0F06875g:MET13:LYS12:CAGL0G06732g:LEU2:CYS3:CAGL0I09284g:HOM3:CAGL0J06402g:CAGL0J08316g:LYS21:CAGL0K03465g:GLN1:CAGL0K07788g:CAGL0K12518g:CAGL0L00429g:HIS1:HIS3:STR3:CAGL0M12188g:CAGL0M12837g	9092:6542:6535:162:35999:6281:19878:9070:9097:19343:70791:19346:55114:6556:9088:6553:1207:6546:19464:6807:9085:6555:9082:10045:19265:19676:9249:71470:6534:6544:71266:9099:9086:19264:1904828:96:105:71269:9098:6730:19344:9090
6520	cellular amino acid metabolic process	5.85e-18	36 out of 171 genes, 21.1%	178 out of 5615 background genes, 3.2%	0	CAGL0A00363g:CAGL0A02112g:CAGL0A02574g:HIS4:SAM1:MET3:CAGL0C01243g:LYS9:CAGL0D04356g:MET15:CAGL0D06556g:CAGL0E05016g:CAGL0F01749g:CAGL0F06875g:MET13:LYS12:CAGL0G06732g:LEU2:CYS3:CAGL0I09284g:HOM3:CAGL0J06402g:CAGL0J08316g:LYS21:CAGL0K03465g:GLN1:CAGL0K07788g:CAGL0K12518g:CAGL0L00429g:HIS1:CAGL0L02321g:HIS3:STR3:CAGL0M00374g:CAGL0M12188g:CAGL0M12837g	9092:6542:6535:162:9073:10134:35999:6281:19878:9070:103:9097:19343:70791:19346:6421:55114:6556:19379:9088:6553:1207:6546:19464:6807:9085:6555:97:9082:10045:19265:19676:9249:71470:6534:6544:71266:6422:9099:9086:19264:1904828:96:105:71269:9098:6730:70814:19344:9090
8652	cellular amino acid biosynthetic process	6.17e-18	28 out of 171 genes, 16.4%	97 out of 5615 background genes, 1.7%	0	CAGL0A00363g:CAGL0A02574g:HIS4:CAGL0C01243g:LYS9:MET15:CAGL0E05016g:CAGL0F01749g:CAGL0F06875g:MET13:LYS12:CAGL0G06732g:LEU2:CYS3:CAGL0I09284g:HOM3:CAGL0J06402g:CAGL0J08316g:LYS21:CAGL0K03465g:GLN1:CAGL0K07788g:CAGL0K12518g:HIS1:HIS3:STR3:CAGL0M00374g:CAGL0M12837g	9092:6542:6535:162:9073:35999:6281:19878:9070:103:9097:19343:70791:19346:55114:9088:6553:1207:6807:6555:9085:97:9082:10045:19265:19676:71470:6534:71266:9099:9086:19264:1904828:96:105:71269:9098:6730:70814:19344:9090
16053	organic acid biosynthetic process	1.17e-17	33 out of 171 genes, 19.3%	148 out of 5615 background genes, 2.6%	0	CAGL0A00363g:CAGL0A02574g:HIS4:CAGL0C01243g:LYS9:CAGL0D00528g:MET15:CAGL0E05016g:CAGL0F01749g:CAGL0F06875g:MET13:MTD1:LYS12:CAGL0G06732g:LEU2:CAGL0H05137g:CYS3:CAGL0I00418g:CAGL0I09284g:HOM3:CAGL0J06402g:CAGL0J08316g:LYS21:CAGL0K03465g:GLN1:CAGL0K07788g:CAGL0K12518g:HIS1:HIS3:STR3:CAGL0L10780g:CAGL0M00374g:CAGL0M12837g	9092:6636:6542:6535:162:9073:35999:6281:19878:9070:103:9097:19343:70791:19346:55114:9113:9088:45471:6553:1207:6807:6555:9085:6740:19413:97:9082:10045:19265:1:9396:19676:71470:6534:42759:71266:9099:9086:19264:1904828:96:105:71269:9098:9651:6730:70814:19344:9090:6633
55114	oxidation-reduction process	4.74e-13	38 out of 171 genes, 22.2%	277 out of 5615 background genes, 4.9%	0	CAGL0A01045g:HIS4:CAGL0B02431g:MET3:CAGL0B04917g:CAGL0C01325g:LYS9:CAGL0C04873g:CAGL0D00528g:CAGL0D05280g:ACO1:CAGL0E01287g:CAGL0E04356g:ACO2:MET13:MET1:MTD1:LYS12:IDH1:CAGL0G07271g:CAGL0G08712g:CAGL0G10153g:CAGL0H02491g:CAGL0H02695g:LEU2:CAGL0H03993g:CAGL0H05137g:CAGL0I00418g:CAGL0I00748g:RIP1:CAGL0J00847g:GPD1:CAGL0K07788g:CAGL0L00429g:CAGL0L02321g:CAGL0L06160g:CAGL0M00374g:CAGL0M12837g	9060:5975:90344:1320:6636:44262:10134:6099:46356:45454:19878:9070:103:6102:6116:5978:6123:61077:6111:55114:16558:1324:9113:19379:77:45471:6553:8152:19464:9085:6740:19413:97:42981:6072:6122:45333:6101:6457:2:1:9396:33194:6120:71470:19430:32543:22900:42759:19655:42262:19354:43065:6103:34599:6973:46168:9086:1302:96:105:9098:6106:9651:6730:70814:72593:6633
44283	small molecule biosynthetic process	9.58e-13	36 out of 171 genes, 21.1%	253 out of 5615 background genes, 4.5%	0	CAGL0A00363g:CAGL0A02574g:HIS4:CAGL0C01243g:PHM8:LYS9:CAGL0D00528g:MET15:CAGL0E05016g:CAGL0F01749g:CAGL0F06875g:MET13:MTD1:LYS12:CAGL0G06732g:LEU2:CAGL0H03993g:CAGL0H05137g:CYS3:CAGL0I00418g:INO1:CAGL0I09284g:HOM3:CAGL0J06402g:CAGL0J08316g:LYS21:CAGL0K03465g:GLN1:CAGL0K07788g:CAGL0K12518g:HIS1:HIS3:STR3:CAGL0L10780g:CAGL0M00374g:CAGL0M12837g	6021:9092:6636:6542:44262:6535:162:9073:35999:6099:6281:46356:19878:9070:103:9097:19343:70791:90549:19346:9166:55114:70328:9113:9088:45471:6553:1207:6807:6555:9085:6740:19413:97:9082:10045:6101:19265:1:9396:19676:71470:6534:42759:71266:9099:9086:19264:8654:1904828:96:105:71269:9098:9651:6730:70814:19344:9090:6633:16036
9069	serine family amino acid metabolic process	2.67e-09	12 out of 171 genes, 7.0%	27 out of 5615 background genes, 0.5%	0	CAGL0D04356g:MET15:CAGL0F01749g:CYS3:CAGL0I09284g:HOM3:CAGL0J08316g:CAGL0K12518g:CAGL0L00429g:STR3:CAGL0M12188g:CAGL0M12837g	9092:6535:35999:9070:19343:19346:55114:9088:6546:19464:6555:19265:9249:6534:6544:71266:9086:19264:1904828:96:71269:6730:19344:9090
9066	aspartate family amino acid metabolic process	5.45e-08	13 out of 171 genes, 7.6%	41 out of 5615 background genes, 0.7%	0	SAM1:LYS9:MET15:CAGL0F06875g:MET13:LYS12:CYS3:HOM3:CAGL0J06402g:CAGL0J08316g:LYS21:CAGL0K07788g:STR3	9092:6535:6281:19878:19343:19346:55114:6556:9088:6553:1207:9085:6555:6534:71266:9086:1904828:96:71269:6730:19344:9090
9067	aspartate family amino acid biosynthetic process	7.01e-08	12 out of 171 genes, 7.0%	34 out of 5615 background genes, 0.6%	0	LYS9:MET15:CAGL0F06875g:MET13:LYS12:CYS3:HOM3:CAGL0J06402g:CAGL0J08316g:LYS21:CAGL0K07788g:STR3	9092:6535:6281:19878:19343:19346:55114:9088:6553:1207:6555:9085:6534:71266:9086:1904828:96:71269:6730:19344:9090
6189	'de novo' IMP biosynthetic process	8.88e-08	7 out of 171 genes, 4.1%	8 out of 5615 background genes, 0.1%	0	CAGL0A03366g:CAGL0B02794g:CAGL0H07887g:CAGL0I04444g:CAGL0K04499g:ADE2:CAGL0M13717g	9116:9152:9113:6188:6164:46084:6144:46083:6106:6189:44208
17144	drug metabolic process	3.52e-07	21 out of 171 genes, 12.3%	138 out of 5615 background genes, 2.5%	0	SAM1:CAGL0B02794g:CAGL0B03663g:CAGL0D04356g:MET15:CAGL0F01749g:CRH1:ATP2:CAGL0H03993g:CAGL0H05137g:CAGL0H05489g:CAGL0I04686g:CAGL0I09284g:CAGL0J08316g:CAGL0K12518g:CAGL0L00429g:STR3:ATP7:CAGL0M00374g:ATP1:CAGL0M12188g	9092:6037:5975:6535:44262:35999:6099:46356:15986:103:19346:55114:6556:6546:19464:6555:6740:19413:97:31505:6101:19265:9249:6164:6534:6544:42776:71266:65003:9086:19264:96:71269:6189:6106:9651:6730:70814:44208
46040	IMP metabolic process	1.26e-06	7 out of 171 genes, 4.1%	10 out of 5615 background genes, 0.2%	0	CAGL0A03366g:CAGL0B02794g:CAGL0H07887g:CAGL0I04444g:CAGL0K04499g:ADE2:CAGL0M13717g	9116:9152:9113:6188:6164:46084:6144:46083:6106:6189:44208
6544	glycine metabolic process	2.64e-06	6 out of 171 genes, 3.5%	7 out of 5615 background genes, 0.1%	0	CAGL0D04356g:CAGL0F01749g:CAGL0I09284g:CAGL0K12518g:CAGL0L00429g:CAGL0M12188g	35999:55114:6546:19464:19265:9249:6544:19264:6730
6730	one-carbon metabolic process	3.38e-06	7 out of 171 genes, 4.1%	11 out of 5615 background genes, 0.2%	0	CAGL0D04356g:CAGL0F01749g:MET13:MTD1:CAGL0I09284g:CAGL0L00429g:CAGL0M12188g	35999:55114:9113:6546:19464:9396:9249:6544:9086:19264:6730
15980	energy derivation by oxidation of organic compounds	8.35e-06	16 out of 171 genes, 9.4%	94 out of 5615 background genes, 1.7%	0	CAGL0A01045g:CAGL0B02431g:CAGL0C01325g:ACO1:CAGL0E01287g:ACO2:IDH1:CAGL0G08712g:CAGL0G10153g:CAGL0H02491g:CAGL0H02695g:CAGL0H03993g:CAGL0I00748g:RIP1:CAGL0J00847g:CAGL0L06160g	9060:44262:6099:46356:6102:6116:5978:6123:8152:42981:6122:45333:6101:2:6120:32543:22900:19655:43065:6103:6106
72522	purine-containing compound biosynthetic process	1.19e-05	13 out of 171 genes, 7.6%	61 out of 5615 background genes, 1.1%	0	CAGL0A03366g:CAGL0B02794g:MTD1:ATP2:CAGL0H05489g:CAGL0H07887g:CAGL0I04444g:CAGL0I04686g:CAGL0K04499g:ADE2:ATP7:ATP1:CAGL0M13717g	9116:9152:15986:55114:9113:6188:9396:6164:46084:42776:65003:6144:46083:6106:6189:6730:44208
9152	purine ribonucleotide biosynthetic process	1.29e-05	12 out of 171 genes, 7.0%	51 out of 5615 background genes, 0.9%	0	CAGL0A03366g:CAGL0B02794g:ATP2:CAGL0H05489g:CAGL0H07887g:CAGL0I04444g:CAGL0I04686g:CAGL0K04499g:ADE2:ATP7:ATP1:CAGL0M13717g	9116:9152:15986:9113:6188:6164:46084:42776:65003:6144:46083:6106:6189:44208
96	sulfur amino acid metabolic process	1.41e-05	10 out of 171 genes, 5.8%	33 out of 5615 background genes, 0.6%	0	SAM1:MET3:MET15:MET13:CYS3:HOM3:CAGL0J08316g:CAGL0L02321g:STR3:CAGL0M00374g	9092:6535:10134:103:19343:19346:55114:6556:19379:9088:6555:97:6534:71266:9086:1904828:96:71269:6730:70814:19344:9090
6164	purine nucleotide biosynthetic process	1.63e-05	12 out of 171 genes, 7.0%	52 out of 5615 background genes, 0.9%	0	CAGL0A03366g:CAGL0B02794g:ATP2:CAGL0H05489g:CAGL0H07887g:CAGL0I04444g:CAGL0I04686g:CAGL0K04499g:ADE2:ATP7:ATP1:CAGL0M13717g	9116:9152:15986:9113:6188:6164:46084:42776:65003:6144:46083:6106:6189:44208
6553	lysine metabolic process	3.01e-05	6 out of 171 genes, 3.5%	9 out of 5615 background genes, 0.2%	0	LYS9:CAGL0F06875g:LYS12:CAGL0J06402g:LYS21:CAGL0K07788g	6281:19878:55114:6553:1207:9085
9085	lysine biosynthetic process	3.01e-05	6 out of 171 genes, 3.5%	9 out of 5615 background genes, 0.2%	0	LYS9:CAGL0F06875g:LYS12:CAGL0J06402g:LYS21:CAGL0K07788g	6281:19878:55114:6553:1207:9085
9260	ribonucleotide biosynthetic process	3.21e-05	12 out of 171 genes, 7.0%	55 out of 5615 background genes, 1.0%	0	CAGL0A03366g:CAGL0B02794g:ATP2:CAGL0H05489g:CAGL0H07887g:CAGL0I04444g:CAGL0I04686g:CAGL0K04499g:ADE2:ATP7:ATP1:CAGL0M13717g	9116:9152:15986:9113:6188:6164:46084:42776:65003:6144:46083:6106:6189:44208
9070	serine family amino acid biosynthetic process	3.26e-05	7 out of 171 genes, 4.1%	14 out of 5615 background genes, 0.2%	0	MET15:CAGL0F01749g:CYS3:CAGL0I09284g:HOM3:CAGL0K12518g:CAGL0M12837g	6535:35999:9070:19343:19346:55114:9088:6555:19265:6534:71266:9086:19264:1904828:71269:6730:19344:9090
46390	ribose phosphate biosynthetic process	7.38e-05	12 out of 171 genes, 7.0%	59 out of 5615 background genes, 1.1%	0	CAGL0A03366g:CAGL0B02794g:ATP2:CAGL0H05489g:CAGL0H07887g:CAGL0I04444g:CAGL0I04686g:CAGL0K04499g:ADE2:ATP7:ATP1:CAGL0M13717g	9116:9152:15986:9113:6188:6164:46084:42776:65003:6144:46083:6106:6189:44208
9060	aerobic respiration	7.38e-05	12 out of 171 genes, 7.0%	59 out of 5615 background genes, 1.1%	0	CAGL0A01045g:CAGL0C01325g:ACO1:CAGL0E01287g:ACO2:IDH1:CAGL0G08712g:CAGL0H02491g:CAGL0H03993g:RIP1:CAGL0J00847g:CAGL0L06160g	9060:44262:6099:46356:6102:6123:8152:6122:45333:6101:2:32543:22900:6103:6106
9126	purine nucleoside monophosphate metabolic process	0.0001	7 out of 171 genes, 4.1%	16 out of 5615 background genes, 0.3%	0	CAGL0A03366g:CAGL0B02794g:CAGL0H07887g:CAGL0I04444g:CAGL0K04499g:ADE2:CAGL0M13717g	9116:9152:9113:6188:6164:46084:6144:46083:6106:6189:44208
9127	purine nucleoside monophosphate biosynthetic process	0.0001	7 out of 171 genes, 4.1%	16 out of 5615 background genes, 0.3%	0	CAGL0A03366g:CAGL0B02794g:CAGL0H07887g:CAGL0I04444g:CAGL0K04499g:ADE2:CAGL0M13717g	9116:9152:9113:6188:6164:46084:6144:46083:6106:6189:44208
9167	purine ribonucleoside monophosphate metabolic process	0.0001	7 out of 171 genes, 4.1%	16 out of 5615 background genes, 0.3%	0	CAGL0A03366g:CAGL0B02794g:CAGL0H07887g:CAGL0I04444g:CAGL0K04499g:ADE2:CAGL0M13717g	9116:9152:9113:6188:6164:46084:6144:46083:6106:6189:44208
9168	purine ribonucleoside monophosphate biosynthetic process	0.0001	7 out of 171 genes, 4.1%	16 out of 5615 background genes, 0.3%	0	CAGL0A03366g:CAGL0B02794g:CAGL0H07887g:CAGL0I04444g:CAGL0K04499g:ADE2:CAGL0M13717g	9116:9152:9113:6188:6164:46084:6144:46083:6106:6189:44208
42133	neurotransmitter metabolic process	0.00015	6 out of 171 genes, 3.5%	11 out of 5615 background genes, 0.2%	0	CAGL0D04356g:CAGL0F01749g:CAGL0I09284g:CAGL0K12518g:CAGL0L00429g:CAGL0M12188g	35999:55114:6546:19464:19265:9249:6544:19264:6730
19878	lysine biosynthetic process via aminoadipic acid	0.00026	5 out of 171 genes, 2.9%	7 out of 5615 background genes, 0.1%	0	LYS9:CAGL0F06875g:CAGL0J06402g:LYS21:CAGL0K07788g	6281:19878:55114:1207:9085
46034	ATP metabolic process	0.00026	12 out of 171 genes, 7.0%	66 out of 5615 background genes, 1.2%	0	CAGL0B02431g:CAGL0C01325g:CAGL0G10153g:ATP2:CAGL0H02491g:CAGL0H05489g:CAGL0I00748g:RIP1:CAGL0I04686g:CAGL0L06160g:ATP7:ATP1	9060:15986:6116:6123:42981:6122:6120:19655:42776:65003:43065
9150	purine ribonucleotide metabolic process	0.0004	13 out of 171 genes, 7.6%	81 out of 5615 background genes, 1.4%	0	CAGL0A03366g:CAGL0B02794g:ATP2:CAGL0H03993g:CAGL0H05489g:CAGL0H07887g:CAGL0I04444g:CAGL0I04686g:CAGL0K04499g:ADE2:ATP7:ATP1:CAGL0M13717g	9116:9152:44262:6099:46356:15986:9113:6188:6101:6164:46084:42776:65003:6144:46083:6106:6189:44208
9156	ribonucleoside monophosphate biosynthetic process	0.00042	7 out of 171 genes, 4.1%	19 out of 5615 background genes, 0.3%	0	CAGL0A03366g:CAGL0B02794g:CAGL0H07887g:CAGL0I04444g:CAGL0K04499g:ADE2:CAGL0M13717g	9116:9152:9113:6188:6164:46084:6144:46083:6106:6189:44208
9161	ribonucleoside monophosphate metabolic process	0.00042	7 out of 171 genes, 4.1%	19 out of 5615 background genes, 0.3%	0	CAGL0A03366g:CAGL0B02794g:CAGL0H07887g:CAGL0I04444g:CAGL0K04499g:ADE2:CAGL0M13717g	9116:9152:9113:6188:6164:46084:6144:46083:6106:6189:44208
72521	purine-containing compound metabolic process	0.00043	14 out of 171 genes, 8.2%	95 out of 5615 background genes, 1.7%	0	CAGL0A03366g:CAGL0B02794g:MTD1:ATP2:CAGL0H03993g:CAGL0H05489g:CAGL0H07887g:CAGL0I04444g:CAGL0I04686g:CAGL0K04499g:ADE2:ATP7:ATP1:CAGL0M13717g	9116:9152:44262:6099:46356:15986:55114:9113:6188:6101:9396:6164:46084:42776:65003:6144:46083:6106:6189:6730:44208
6163	purine nucleotide metabolic process	0.00046	13 out of 171 genes, 7.6%	82 out of 5615 background genes, 1.5%	0	CAGL0A03366g:CAGL0B02794g:ATP2:CAGL0H03993g:CAGL0H05489g:CAGL0H07887g:CAGL0I04444g:CAGL0I04686g:CAGL0K04499g:ADE2:ATP7:ATP1:CAGL0M13717g	9116:9152:44262:6099:46356:15986:9113:6188:6101:6164:46084:42776:65003:6144:46083:6106:6189:44208
1505	regulation of neurotransmitter levels	0.00055	6 out of 171 genes, 3.5%	13 out of 5615 background genes, 0.2%	0	CAGL0D04356g:CAGL0F01749g:CAGL0I09284g:CAGL0K12518g:CAGL0L00429g:CAGL0M12188g	35999:55114:6546:19464:19265:9249:6544:19264:6730
55086	nucleobase-containing small molecule metabolic process	0.00064	18 out of 171 genes, 10.5%	159 out of 5615 background genes, 2.8%	0	CAGL0A01023g:CAGL0A03366g:CAGL0B02794g:PHM8:VIG9:FCY1:MTD1:ATP2:CAGL0H03993g:CAGL0H05489g:CAGL0H07887g:CAGL0I04444g:CAGL0I04686g:CAGL0K04499g:ADE2:ATP7:ATP1:CAGL0M13717g	32:9116:8655:9152:44262:9435:6099:46356:15986:9272:90549:9166:6486:55114:19858:46087:70328:9113:6188:6101:9396:6164:46084:42776:9298:65003:6144:46083:6106:6189:6730:16036:44208
9259	ribonucleotide metabolic process	0.00093	13 out of 171 genes, 7.6%	87 out of 5615 background genes, 1.5%	0	CAGL0A03366g:CAGL0B02794g:ATP2:CAGL0H03993g:CAGL0H05489g:CAGL0H07887g:CAGL0I04444g:CAGL0I04686g:CAGL0K04499g:ADE2:ATP7:ATP1:CAGL0M13717g	9116:9152:44262:6099:46356:15986:9113:6188:6101:6164:46084:42776:65003:6144:46083:6106:6189:44208
1901293	nucleoside phosphate biosynthetic process	0.00121	13 out of 171 genes, 7.6%	89 out of 5615 background genes, 1.6%	0	CAGL0A01023g:CAGL0A03366g:CAGL0B02794g:ATP2:CAGL0H05489g:CAGL0H07887g:CAGL0I04444g:CAGL0I04686g:CAGL0K04499g:ADE2:ATP7:ATP1:CAGL0M13717g	9116:9152:9435:15986:9113:6188:6164:46084:42776:65003:6144:46083:6106:6189:44208
9124	nucleoside monophosphate biosynthetic process	0.00131	7 out of 171 genes, 4.1%	22 out of 5615 background genes, 0.4%	0	CAGL0A03366g:CAGL0B02794g:CAGL0H07887g:CAGL0I04444g:CAGL0K04499g:ADE2:CAGL0M13717g	9116:9152:9113:6188:6164:46084:6144:46083:6106:6189:44208
97	sulfur amino acid biosynthetic process	0.00131	7 out of 171 genes, 4.1%	22 out of 5615 background genes, 0.4%	0	MET15:MET13:CYS3:HOM3:CAGL0J08316g:STR3:CAGL0M00374g	9092:6535:103:19343:19346:55114:9088:6555:97:6534:71266:9086:1904828:96:71269:6730:70814:19344:9090
19693	ribose phosphate metabolic process	0.00178	13 out of 171 genes, 7.6%	92 out of 5615 background genes, 1.6%	0	CAGL0A03366g:CAGL0B02794g:ATP2:CAGL0H03993g:CAGL0H05489g:CAGL0H07887g:CAGL0I04444g:CAGL0I04686g:CAGL0K04499g:ADE2:ATP7:ATP1:CAGL0M13717g	9116:9152:44262:6099:46356:15986:9113:6188:6101:6164:46084:42776:65003:6144:46083:6106:6189:44208
6119	oxidative phosphorylation	0.00253	7 out of 171 genes, 4.1%	24 out of 5615 background genes, 0.4%	0	CAGL0B02431g:CAGL0C01325g:CAGL0G10153g:ATP2:CAGL0H02491g:RIP1:CAGL0L06160g	9060:15986:6116:6123:6122:6120:42776:43065
6555	methionine metabolic process	0.00253	7 out of 171 genes, 4.1%	24 out of 5615 background genes, 0.4%	0	SAM1:MET15:MET13:CYS3:HOM3:CAGL0J08316g:STR3	9092:6535:19343:19346:55114:6556:9088:6555:6534:71266:9086:1904828:96:71269:6730:19344:9090
9123	nucleoside monophosphate metabolic process	0.00253	7 out of 171 genes, 4.1%	24 out of 5615 background genes, 0.4%	0	CAGL0A03366g:CAGL0B02794g:CAGL0H07887g:CAGL0I04444g:CAGL0K04499g:ADE2:CAGL0M13717g	9116:9152:9113:6188:6164:46084:6144:46083:6106:6189:44208
9117	nucleotide metabolic process	0.00278	15 out of 171 genes, 8.8%	126 out of 5615 background genes, 2.2%	0	CAGL0A01023g:CAGL0A03366g:CAGL0B02794g:PHM8:ATP2:CAGL0H03993g:CAGL0H05489g:CAGL0H07887g:CAGL0I04444g:CAGL0I04686g:CAGL0K04499g:ADE2:ATP7:ATP1:CAGL0M13717g	9116:9152:44262:9435:6099:46356:15986:90549:9166:70328:9113:6188:6101:6164:46084:42776:65003:6144:46083:6106:6189:16036:44208
6790	sulfur compound metabolic process	0.00459	13 out of 171 genes, 7.6%	100 out of 5615 background genes, 1.8%	0	SAM1:MET3:CAGL0D05280g:MET15:MET13:CAGL0H03993g:CYS3:HOM3:CAGL0J08316g:CAGL0L02321g:STR3:CAGL0M00374g:CAGL0M02629g	9092:44571:44262:6535:10134:6099:46356:103:19343:19346:55114:6556:19379:9088:6555:97:16226:6101:6534:71266:2098:9086:1904828:96:71269:6730:6879:70814:19344:9090
19438	aromatic compound biosynthetic process	0.00498	31 out of 171 genes, 18.1%	447 out of 5615 background genes, 8.0%	0	CAGL0A01023g:CAGL0A02574g:CAGL0A03366g:HIS4:CAGL0B02794g:CAGL0C01243g:PHM8:VIG9:FCY1:CAGL0D01716g:CAGL0E00737g:CAGL0E02453g:CAGL0E05016g:MET1:MTD1:ATP2:CAGL0H03993g:CAGL0H05489g:CAGL0H07887g:CAGL0I04444g:CAGL0I04686g:CAGL0J04070g:CAGL0K04499g:ADE2:HIS1:HIS3:ATP7:CAGL0M03487g:CAGL0M06677g:ATP1:CAGL0M13717g	32:9116:90579:43935:8655:9152:6352:44262:162:9073:9435:6099:44804:42797:46356:15986:9272:60962:70791:90549:9166:6486:55114:19858:46087:70328:9113:70987:70914:1174:1903459:6188:6265:6323:6301:1903364:6360:10045:6101:70550:6334:6383:9396:6164:42276:6369:46084:42776:6366:34729:19354:9298:65003:61587:6144:1900264:46083:105:6106:6189:90202:6730:30261:6271:16036:6356:44208
6753	nucleoside phosphate metabolic process	0.00545	15 out of 171 genes, 8.8%	133 out of 5615 background genes, 2.4%	0	CAGL0A01023g:CAGL0A03366g:CAGL0B02794g:PHM8:ATP2:CAGL0H03993g:CAGL0H05489g:CAGL0H07887g:CAGL0I04444g:CAGL0I04686g:CAGL0K04499g:ADE2:ATP7:ATP1:CAGL0M13717g	9116:9152:44262:9435:6099:46356:15986:90549:9166:70328:9113:6188:6101:6164:46084:42776:65003:6144:46083:6106:6189:16036:44208
1901566	organonitrogen compound biosynthetic process	0.00691	49 out of 171 genes, 28.7%	892 out of 5615 background genes, 15.9%	0.0003	CAGL0A00363g:CAGL0A01023g:CAGL0A02112g:CAGL0A02574g:CAGL0A03366g:HIS4:CAGL0B02794g:CAGL0C01243g:LYS9:VIG9:MET15:CAGL0D06556g:CAGL0E05016g:CAGL0F01749g:ACO2:CAGL0F06875g:MET13:MET1:MTD1:LYS12:CAGL0G05071g:CAGL0G06732g:ATP2:LEU2:CAGL0H05489g:CYS3:CAGL0H07887g:CAGL0I04444g:CAGL0I04686g:CAGL0I09284g:HOM3:CAGL0J06402g:CAGL0J08316g:LYS21:CAGL0K03465g:CAGL0K04499g:GLN1:CAGL0K07788g:ADE2:CAGL0K12518g:HIS…	9092:32:9116:9152:6413:6542:6535:162:9073:35999:9435:6099:6281:15986:9272:19878:9070:103:9097:19343:70791:19346:6421:6486:55114:9113:9088:6553:1207:6807:6555:9085:97:9082:6188:10045:30148:19265:9396:19676:71470:6164:6534:32543:46084:42776:71266:19354:6422:9298:65003:9099:9086:19264:6144:1904828:46083:96:105:71269:6106:6189:9098:6730:70814:19344:9090:44208
44249	cellular biosynthetic process	0.01133	67 out of 171 genes, 39.2%	1401 out of 5615 background genes, 25.0%	0.0006	CAGL0A00363g:CAGL0A01023g:CAGL0A02112g:CAGL0A02574g:CAGL0A03366g:HIS4:SAM1:CAGL0B02794g:CAGL0C01243g:PHM8:LYS9:CAGL0D00528g:VIG9:FCY1:CAGL0D01716g:MET15:CAGL0D06556g:CAGL0E00737g:CAGL0E02453g:CAGL0E05016g:CAGL0F01749g:ACO2:CAGL0F06875g:MET13:MET1:MTD1:LYS12:CAGL0G05071g:CAGL0G06732g:ATP2:CAGL0H02695g:LEU2:CAGL0H03993g:CAGL0H05137g:CAGL0H05489g:CYS3:CAGL0H07887g:CAGL0I00418g:CAGL0I04444g:CAGL0I046…	6021:32:9116:9152:6636:6352:44262:6535:35999:9435:6281:42797:9272:9070:60962:9097:19343:70791:19346:6486:19858:30174:9113:45471:6553:1207:6807:9085:6555:6740:1903468:70914:16226:9082:1903459:6188:6265:6323:6301:6360:6334:19265:6383:19676:71470:82:42276:32543:71266:6366:6267:19264:8654:1934:46083:96:9651:6730:6271:6879:19344:6356:33314:44208:9092:90579:43935:8655:44571:6413:6542:162:9073:6099:4480…
105	histidine biosynthetic process	0.01431	4 out of 171 genes, 2.3%	7 out of 5615 background genes, 0.1%	0.0009	HIS4:CAGL0C01243g:HIS1:HIS3	55114:10045:105
72350	tricarboxylic acid metabolic process	0.01431	4 out of 171 genes, 2.3%	7 out of 5615 background genes, 0.1%	0.0009	CAGL0B03663g:CAGL0B04917g:IDH1:CAGL0H03993g	44262:6102:6099:46356:55114:6101
9073	aromatic amino acid family biosynthetic process	0.01434	6 out of 171 genes, 3.5%	21 out of 5615 background genes, 0.4%	0.0009	CAGL0A02574g:HIS4:CAGL0C01243g:CAGL0E05016g:HIS1:HIS3	70791:162:9073:55114:10045:105
9086	methionine biosynthetic process	0.01434	6 out of 171 genes, 3.5%	21 out of 5615 background genes, 0.4%	0.0009	MET15:MET13:CYS3:HOM3:CAGL0J08316g:STR3	6535:19343:19346:6555:71266:96:6730:19344:9092:55114:9088:6534:9086:1904828:71269:9090
34220	ion transmembrane transport	0.01449	13 out of 171 genes, 7.6%	111 out of 5615 background genes, 2.0%	0.0008	PHO84:CAGL0E01353g:CAGL0F00231g:CAGL0F08085g:ATP2:CAGL0H05489g:CAGL0I04686g:CAGL0I07689g:CAGL0K04367g:CAGL0K07436g:CAGL0L02079g:ATP7:ATP1	6843:55085:1903692:97080:1900062:101:2:71578:6842:15986:34488:6828:6817:42776:35435:65003:15742:6850:6797
6546	glycine catabolic process	0.01468	3 out of 171 genes, 1.8%	3 out of 5615 background genes, 0.1%	0.0008	CAGL0D04356g:CAGL0L00429g:CAGL0M12188g	6546:9249:6544:6730:55114:19464
42773	ATP synthesis coupled electron transport	0.01922	6 out of 171 genes, 3.5%	22 out of 5615 background genes, 0.4%	0.0011	CAGL0B02431g:CAGL0C01325g:CAGL0G10153g:CAGL0H02491g:RIP1:CAGL0L06160g	6116:6123:9060:6122:6120:43065
42775	mitochondrial ATP synthesis coupled electron transport	0.01922	6 out of 171 genes, 3.5%	22 out of 5615 background genes, 0.4%	0.0011	CAGL0B02431g:CAGL0C01325g:CAGL0G10153g:CAGL0H02491g:RIP1:CAGL0L06160g	6116:6123:9060:6122:6120:43065
9092	homoserine metabolic process	0.02093	5 out of 171 genes, 2.9%	14 out of 5615 background genes, 0.2%	0.0013	MET15:CYS3:HOM3:CAGL0J08316g:STR3	6535:19343:19346:6555:71266:96:19344:9092:9088:6534:9086:1904828:71269:9090
22904	respiratory electron transport chain	0.02535	6 out of 171 genes, 3.5%	23 out of 5615 background genes, 0.4%	0.0013	CAGL0B02431g:CAGL0C01325g:CAGL0G10153g:CAGL0H02491g:RIP1:CAGL0L06160g	6116:6123:9060:6122:6120:43065
18130	heterocycle biosynthetic process	0.0275	30 out of 171 genes, 17.5%	464 out of 5615 background genes, 8.3%	0.0013	CAGL0A01023g:CAGL0A02574g:CAGL0A03366g:HIS4:CAGL0B02794g:CAGL0C01243g:PHM8:VIG9:FCY1:CAGL0D01716g:CAGL0E00737g:CAGL0E02453g:MET1:MTD1:ATP2:CAGL0H03993g:CAGL0H05489g:CAGL0H07887g:CAGL0I04444g:CAGL0I04686g:CAGL0J04070g:CAGL0K04499g:ADE2:HIS1:HIS3:ATP7:CAGL0M03487g:CAGL0M06677g:ATP1:CAGL0M13717g	32:9116:9152:6352:44262:9435:42797:9272:60962:70791:6486:19858:9113:70914:1903459:6188:6265:6323:6301:6360:6334:6383:42276:6366:46083:6730:6271:6356:44208:90579:43935:8655:162:6099:44804:46356:15986:90549:9166:55114:46087:70328:70987:1174:1903364:10045:6101:70550:9396:6164:6369:46084:42776:34729:19354:9298:65003:61587:6144:1900264:105:6106:6189:90202:30261:16036
103	sulfate assimilation	0.02795	4 out of 171 genes, 2.3%	8 out of 5615 background genes, 0.1%	0.0013	MET3:CAGL0D05280g:CAGL0L02321g:CAGL0M00374g	19379:96:10134:103:55114:97:70814
52803	imidazole-containing compound metabolic process	0.02795	4 out of 171 genes, 2.3%	8 out of 5615 background genes, 0.1%	0.0013	HIS4:CAGL0C01243g:HIS1:HIS3	55114:10045:105
6547	histidine metabolic process	0.02795	4 out of 171 genes, 2.3%	8 out of 5615 background genes, 0.1%	0.0012	HIS4:CAGL0C01243g:HIS1:HIS3	55114:10045:105
1901576	organic substance biosynthetic process	0.03405	66 out of 171 genes, 38.6%	1418 out of 5615 background genes, 25.3%	0.0015	CAGL0A00363g:CAGL0A01023g:CAGL0A02112g:CAGL0A02574g:CAGL0A03366g:HIS4:SAM1:CAGL0B02794g:CAGL0C01243g:PHM8:LYS9:CAGL0D00528g:VIG9:FCY1:CAGL0D01716g:MET15:CAGL0D06556g:CAGL0E00737g:CAGL0E02453g:CAGL0E05016g:CAGL0F01749g:ACO2:CAGL0F06875g:MET13:MET1:MTD1:LYS12:CAGL0G05071g:CAGL0G06732g:ATP2:CAGL0H02695g:LEU2:CAGL0H03993g:CAGL0H05137g:CAGL0H05489g:CYS3:CAGL0H07887g:CAGL0I00418g:CAGL0I04444g:CAGL0I046…	6021:32:9116:9152:6636:6352:44262:6535:35999:9435:6281:42797:9272:9070:60962:9097:19343:70791:19346:6486:19858:30174:9113:45471:6553:1207:6807:9085:6555:6740:1903468:70914:9082:1903459:6188:6265:6323:6301:6360:6334:19265:6383:19676:71470:82:42276:32543:71266:6366:6267:19264:8654:1934:46083:96:9651:6730:6271:19344:6356:33314:44208:9092:90579:43935:8655:6413:6542:162:9073:6099:44804:31938:46356:159…
9058	biosynthetic process	0.04011	67 out of 171 genes, 39.2%	1454 out of 5615 background genes, 25.9%	0.0015	CAGL0A00363g:CAGL0A01023g:CAGL0A02112g:CAGL0A02574g:CAGL0A03366g:HIS4:SAM1:CAGL0B02794g:CAGL0C01243g:PHM8:LYS9:CAGL0D00528g:VIG9:FCY1:CAGL0D01716g:MET15:CAGL0D06556g:CAGL0E00737g:CAGL0E02453g:CAGL0E05016g:CAGL0F01749g:ACO2:CAGL0F06875g:MET13:MET1:MTD1:LYS12:CAGL0G05071g:CAGL0G06732g:ATP2:CAGL0H02695g:LEU2:CAGL0H03993g:CAGL0H05137g:CAGL0H05489g:CYS3:CAGL0H07887g:CAGL0I00418g:CAGL0I04444g:CAGL0I046…	6021:32:9116:9152:6636:6352:44262:6535:35999:9435:6281:42797:9272:9070:60962:9097:19343:70791:19346:6486:19858:30174:9113:45471:6553:1207:6807:9085:6555:6740:1903468:70914:16226:9082:1903459:6188:6265:6323:6301:6360:6334:19265:6383:19676:71470:82:42276:32543:71266:6366:6267:19264:8654:1934:46083:96:9651:6730:6271:6879:19344:6356:33314:44208:9092:90579:43935:8655:44571:6413:6542:162:9073:6099:4480…
44272	sulfur compound biosynthetic process	0.05157	8 out of 171 genes, 4.7%	49 out of 5615 background genes, 0.9%	0.0024	SAM1:MET15:MET13:CYS3:HOM3:CAGL0J08316g:STR3:CAGL0M00374g	6535:19343:19346:6555:71266:96:6730:19344:9092:103:55114:6556:9088:97:6534:9086:1904828:71269:70814:9090
1901362	organic cyclic compound biosynthetic process	0.05234	31 out of 171 genes, 18.1%	504 out of 5615 background genes, 9.0%	0.0024	CAGL0A01023g:CAGL0A02574g:CAGL0A03366g:HIS4:CAGL0B02794g:CAGL0C01243g:PHM8:VIG9:FCY1:CAGL0D01716g:CAGL0E00737g:CAGL0E02453g:CAGL0E05016g:MET1:MTD1:ATP2:CAGL0H03993g:CAGL0H05489g:CAGL0H07887g:CAGL0I04444g:CAGL0I04686g:CAGL0J04070g:CAGL0K04499g:ADE2:HIS1:HIS3:ATP7:CAGL0M03487g:CAGL0M06677g:ATP1:CAGL0M13717g	32:9116:9152:6352:44262:9435:42797:9272:60962:70791:6486:19858:9113:70914:1903459:6188:6265:6323:6301:6360:6334:6383:42276:6366:46083:6730:6271:6356:44208:90579:43935:8655:162:9073:6099:44804:46356:15986:90549:9166:55114:46087:70328:70987:1174:1903364:10045:6101:70550:9396:6164:6369:46084:42776:34729:19354:9298:65003:61587:6144:1900264:105:6106:6189:90202:30261:16036
6106	fumarate metabolic process	0.05743	3 out of 171 genes, 1.8%	4 out of 5615 background genes, 0.1%	0.0026	CAGL0A01045g:CAGL0B02794g:CAGL0I04444g	9152:44208:6099:6164:46084:6189:6106
6545	glycine biosynthetic process	0.05743	3 out of 171 genes, 1.8%	4 out of 5615 background genes, 0.1%	0.0026	CAGL0F01749g:CAGL0I09284g:CAGL0K12518g	35999:19265:19264:6730
9071	serine family amino acid catabolic process	0.05743	3 out of 171 genes, 1.8%	4 out of 5615 background genes, 0.1%	0.0025	CAGL0D04356g:CAGL0L00429g:CAGL0M12188g	6546:9249:6544:6730:55114:19464
6144	purine nucleobase metabolic process	0.06007	5 out of 171 genes, 2.9%	17 out of 5615 background genes, 0.3%	0.0025	MTD1:CAGL0H07887g:CAGL0I04444g:ADE2:CAGL0M13717g	9116:9152:9113:46083:6730:55114:9396:6164:46084:6144:6106:6189
9112	nucleobase metabolic process	0.06719	6 out of 171 genes, 3.5%	27 out of 5615 background genes, 0.5%	0.0027	FCY1:MTD1:CAGL0H07887g:CAGL0I04444g:ADE2:CAGL0M13717g	9116:9152:19858:9113:46083:6730:8655:55114:46087:9396:6164:46084:6144:6106:6189
9072	aromatic amino acid family metabolic process	0.08338	6 out of 171 genes, 3.5%	28 out of 5615 background genes, 0.5%	0.0031	CAGL0A02574g:HIS4:CAGL0C01243g:CAGL0E05016g:HIS1:HIS3	70791:162:9073:55114:10045:105
	GO-Term enrichment employing FungiDB database
ID	Name	P-value	Bgd count	Result count	Result gene list	Pct of bgd	Fold enrichment	Odds ratio	Benjamini	Bonferroni
GO:0044281	small molecule metabolic process	6.81087e-31	598	78	CAGL0A00363g,CAGL0A01023g,CAGL0A01045g,CAGL0A02112g,CAGL0A02574g,CAGL0A03366g,CAGL0B00902g,CAGL0B01122g,CAGL0B02431g,CAGL0B02475g,CAGL0B02794g,CAGL0B03663g,CAGL0B03839g,CAGL0B04917g,CAGL0C01243g,CAGL0C01325g,CAGL0C02321g,CAGL0C03443g,CAGL0D00528g,CAGL0D01034g,CAGL0D01562g,CAGL0D04356g,CAGL0D06402g,CAGL0D06424g,CAGL0D06556g,CAGL0E01287g,CAGL0E05016g,CAGL0F01749g,CAGL0F02431g,CAGL0F06875g,CAGL0F070…	13	4.04	7.43	7.99596e-28	7.99596e-28
GO:0043436	oxoacid metabolic process	7.29868e-27	334	56	CAGL0A00363g,CAGL0A01045g,CAGL0A02112g,CAGL0A02574g,CAGL0B00902g,CAGL0B01122g,CAGL0B02475g,CAGL0B02794g,CAGL0B03663g,CAGL0B03839g,CAGL0B04917g,CAGL0C01243g,CAGL0C03443g,CAGL0D00528g,CAGL0D04356g,CAGL0D06402g,CAGL0D06424g,CAGL0D06556g,CAGL0E01287g,CAGL0E05016g,CAGL0F01749g,CAGL0F02431g,CAGL0F06875g,CAGL0F07029g,CAGL0G01903g,CAGL0G02189g,CAGL0G02585g,CAGL0G02673g,CAGL0G06732g,CAGL0G08712g,CAGL0H037…	16.8	5.19	8.49	3.3517e-24	8.56865e-24
GO:0006082	organic acid metabolic process	8.56481e-27	335	56	CAGL0A00363g,CAGL0A01045g,CAGL0A02112g,CAGL0A02574g,CAGL0B00902g,CAGL0B01122g,CAGL0B02475g,CAGL0B02794g,CAGL0B03663g,CAGL0B03839g,CAGL0B04917g,CAGL0C01243g,CAGL0C03443g,CAGL0D00528g,CAGL0D04356g,CAGL0D06402g,CAGL0D06424g,CAGL0D06556g,CAGL0E01287g,CAGL0E05016g,CAGL0F01749g,CAGL0F02431g,CAGL0F06875g,CAGL0F07029g,CAGL0G01903g,CAGL0G02189g,CAGL0G02585g,CAGL0G02673g,CAGL0G06732g,CAGL0G08712g,CAGL0H037…	16.7	5.18	8.46	3.3517e-24	1.00551e-23
GO:0019752	carboxylic acid metabolic process	1.24696e-26	324	55	CAGL0A00363g,CAGL0A01045g,CAGL0A02112g,CAGL0A02574g,CAGL0B00902g,CAGL0B01122g,CAGL0B02794g,CAGL0B03663g,CAGL0B03839g,CAGL0B04917g,CAGL0C01243g,CAGL0C03443g,CAGL0D00528g,CAGL0D04356g,CAGL0D06402g,CAGL0D06424g,CAGL0D06556g,CAGL0E01287g,CAGL0E05016g,CAGL0F01749g,CAGL0F02431g,CAGL0F06875g,CAGL0F07029g,CAGL0G01903g,CAGL0G02189g,CAGL0G02585g,CAGL0G02673g,CAGL0G06732g,CAGL0G08712g,CAGL0H03795g,CAGL0H039…	17	5.26	8.56	3.65984e-24	1.46393e-23
GO:1901605	alpha-amino acid metabolic process	1.3248e-21	111	31	CAGL0A00363g,CAGL0A02574g,CAGL0B00902g,CAGL0B01122g,CAGL0C01243g,CAGL0C03443g,CAGL0D04356g,CAGL0D06402g,CAGL0F01749g,CAGL0F06875g,CAGL0F07029g,CAGL0G01903g,CAGL0G02585g,CAGL0G06732g,CAGL0H03795g,CAGL0H06369g,CAGL0I09284g,CAGL0J02882g,CAGL0J06402g,CAGL0J08316g,CAGL0J09240g,CAGL0K03465g,CAGL0K05357g,CAGL0K07788g,CAGL0K12518g,CAGL0L00429g,CAGL0L00759g,CAGL0L02937g,CAGL0L06094g,CAGL0M12188g,CAGL0M128…	27.9	8.65	13.97	3.11064e-19	1.55532e-18
GO:0008652	cellular amino acid biosynthetic process	6.88256e-21	99	29	CAGL0A00363g,CAGL0A02574g,CAGL0B00902g,CAGL0C01243g,CAGL0C03443g,CAGL0D06402g,CAGL0E05016g,CAGL0F01749g,CAGL0F06875g,CAGL0F07029g,CAGL0G01903g,CAGL0G02585g,CAGL0G06732g,CAGL0H03795g,CAGL0H06369g,CAGL0I09284g,CAGL0J02882g,CAGL0J06402g,CAGL0J08316g,CAGL0J09240g,CAGL0K03465g,CAGL0K05357g,CAGL0K07788g,CAGL0K12518g,CAGL0L00759g,CAGL0L02937g,CAGL0L06094g,CAGL0M00374g,CAGL0M12837g,	29.3	9.07	14.75	1.27575e-18	8.08013e-18
GO:0006520	cellular amino acid metabolic process	7.60669e-21	178	37	CAGL0A00363g,CAGL0A02112g,CAGL0A02574g,CAGL0B00902g,CAGL0B01122g,CAGL0B03839g,CAGL0C01243g,CAGL0C03443g,CAGL0D04356g,CAGL0D06402g,CAGL0D06556g,CAGL0E05016g,CAGL0F01749g,CAGL0F06875g,CAGL0F07029g,CAGL0G01903g,CAGL0G02585g,CAGL0G06732g,CAGL0H03795g,CAGL0H06369g,CAGL0I09284g,CAGL0J02882g,CAGL0J06402g,CAGL0J08316g,CAGL0J09240g,CAGL0K03465g,CAGL0K05357g,CAGL0K07788g,CAGL0K12518g,CAGL0L00429g,CAGL0L007…	20.8	6.44	9.76	1.27575e-18	8.93025e-18
GO:1901607	alpha-amino acid biosynthetic process	2.22642e-20	86	27	CAGL0A00363g,CAGL0A02574g,CAGL0B00902g,CAGL0C01243g,CAGL0C03443g,CAGL0D06402g,CAGL0F01749g,CAGL0F06875g,CAGL0F07029g,CAGL0G01903g,CAGL0G02585g,CAGL0G06732g,CAGL0H03795g,CAGL0H06369g,CAGL0I09284g,CAGL0J02882g,CAGL0J06402g,CAGL0J08316g,CAGL0J09240g,CAGL0K03465g,CAGL0K05357g,CAGL0K07788g,CAGL0K12518g,CAGL0L00759g,CAGL0L02937g,CAGL0L06094g,CAGL0M12837g,	31.4	9.73	16.1	3.26727e-18	2.61381e-17
GO:0016053	organic acid biosynthetic process	1.0833e-18	169	34	CAGL0A00363g,CAGL0A02574g,CAGL0B00902g,CAGL0C01243g,CAGL0C03443g,CAGL0D00528g,CAGL0D06402g,CAGL0E05016g,CAGL0F01749g,CAGL0F06875g,CAGL0F07029g,CAGL0G01903g,CAGL0G02189g,CAGL0G02585g,CAGL0G06732g,CAGL0H03795g,CAGL0H05137g,CAGL0H06369g,CAGL0I00418g,CAGL0I09284g,CAGL0J02882g,CAGL0J06402g,CAGL0J08316g,CAGL0J09240g,CAGL0K03465g,CAGL0K05357g,CAGL0K07788g,CAGL0K12518g,CAGL0L00759g,CAGL0L02937g,CAGL0L060…	20.1	6.23	9.18	1.2718e-16	1.2718e-15
GO:0046394	carboxylic acid biosynthetic process	1.0833e-18	169	34	CAGL0A00363g,CAGL0A02574g,CAGL0B00902g,CAGL0C01243g,CAGL0C03443g,CAGL0D00528g,CAGL0D06402g,CAGL0E05016g,CAGL0F01749g,CAGL0F06875g,CAGL0F07029g,CAGL0G01903g,CAGL0G02189g,CAGL0G02585g,CAGL0G06732g,CAGL0H03795g,CAGL0H05137g,CAGL0H06369g,CAGL0I00418g,CAGL0I09284g,CAGL0J02882g,CAGL0J06402g,CAGL0J08316g,CAGL0J09240g,CAGL0K03465g,CAGL0K05357g,CAGL0K07788g,CAGL0K12518g,CAGL0L00759g,CAGL0L02937g,CAGL0L060…	20.1	6.23	9.18	1.2718e-16	1.2718e-15
GO:0017144	drug metabolic process	1.17837e-16	195	34	CAGL0A01045g,CAGL0B01122g,CAGL0B02431g,CAGL0B02794g,CAGL0B03663g,CAGL0C01325g,CAGL0D04356g,CAGL0D06424g,CAGL0E01287g,CAGL0F01749g,CAGL0F02431g,CAGL0G02673g,CAGL0G07271g,CAGL0G08712g,CAGL0G09449g,CAGL0G10153g,CAGL0H00506g,CAGL0H02491g,CAGL0H03993g,CAGL0H05137g,CAGL0H05489g,CAGL0I00748g,CAGL0I03190g,CAGL0I04686g,CAGL0I09284g,CAGL0J00847g,CAGL0K12518g,CAGL0L00429g,CAGL0L06094g,CAGL0L06160g,CAGL0L097…	17.4	5.4	7.65	1.25764e-14	1.38341e-13
GO:0055114	oxidation-reduction process	9.37125e-15	281	38	CAGL0A01045g,CAGL0B00902g,CAGL0B02431g,CAGL0B03839g,CAGL0B04917g,CAGL0C01325g,CAGL0C03443g,CAGL0C04873g,CAGL0D00528g,CAGL0D05280g,CAGL0D06424g,CAGL0E01287g,CAGL0E04356g,CAGL0F02431g,CAGL0F07029g,CAGL0G01903g,CAGL0G02189g,CAGL0G02585g,CAGL0G02673g,CAGL0G07271g,CAGL0G08712g,CAGL0G10153g,CAGL0H02491g,CAGL0H02695g,CAGL0H03795g,CAGL0H03993g,CAGL0H05137g,CAGL0I00418g,CAGL0I00748g,CAGL0I03190g,CAGL0J008…	13.5	4.19	5.74	9.16821e-13	1.10019e-11
GO:0044283	small molecule biosynthetic process	3.37207e-14	277	37	CAGL0A00363g,CAGL0A02574g,CAGL0B00902g,CAGL0C01243g,CAGL0C02321g,CAGL0C03443g,CAGL0D00528g,CAGL0D06402g,CAGL0E05016g,CAGL0F01749g,CAGL0F06875g,CAGL0F07029g,CAGL0G01903g,CAGL0G02189g,CAGL0G02585g,CAGL0G06732g,CAGL0H03795g,CAGL0H03993g,CAGL0H05137g,CAGL0H06369g,CAGL0I00418g,CAGL0I06050g,CAGL0I09284g,CAGL0J02882g,CAGL0J06402g,CAGL0J08316g,CAGL0J09240g,CAGL0K03465g,CAGL0K05357g,CAGL0K07788g,CAGL0K125…	13.4	4.14	5.62	3.04524e-12	3.95881e-11
GO:0009069	serine family amino acid metabolic process	1.68558e-12	24	12	CAGL0D04356g,CAGL0D06402g,CAGL0F01749g,CAGL0H06369g,CAGL0I09284g,CAGL0J02882g,CAGL0J08316g,CAGL0K12518g,CAGL0L00429g,CAGL0L06094g,CAGL0M12188g,CAGL0M12837g,	50	15.49	32.16	1.41348e-10	1.97887e-09
GO:0009126	purine nucleoside monophosphate metabolic process	9.2625e-12	84	19	CAGL0A03366g,CAGL0B02431g,CAGL0B02794g,CAGL0C01325g,CAGL0G10153g,CAGL0H00506g,CAGL0H02491g,CAGL0H05489g,CAGL0H07887g,CAGL0I00748g,CAGL0I03190g,CAGL0I04444g,CAGL0I04686g,CAGL0K04499g,CAGL0K10340g,CAGL0L06160g,CAGL0L09713g,CAGL0M09581g,CAGL0M13717g,	22.6	7.01	9.73	6.79636e-10	1.08742e-08
GO:0009167	purine ribonucleoside monophosphate metabolic process	9.2625e-12	84	19	CAGL0A03366g,CAGL0B02431g,CAGL0B02794g,CAGL0C01325g,CAGL0G10153g,CAGL0H00506g,CAGL0H02491g,CAGL0H05489g,CAGL0H07887g,CAGL0I00748g,CAGL0I03190g,CAGL0I04444g,CAGL0I04686g,CAGL0K04499g,CAGL0K10340g,CAGL0L06160g,CAGL0L09713g,CAGL0M09581g,CAGL0M13717g,	22.6	7.01	9.73	6.79636e-10	1.08742e-08
GO:0009161	ribonucleoside monophosphate metabolic process	1.80155e-11	87	19	CAGL0A03366g,CAGL0B02431g,CAGL0B02794g,CAGL0C01325g,CAGL0G10153g,CAGL0H00506g,CAGL0H02491g,CAGL0H05489g,CAGL0H07887g,CAGL0I00748g,CAGL0I03190g,CAGL0I04444g,CAGL0I04686g,CAGL0K04499g,CAGL0K10340g,CAGL0L06160g,CAGL0L09713g,CAGL0M09581g,CAGL0M13717g,	21.8	6.77	9.3	1.23255e-09	2.11502e-08
GO:0009066	aspartate family amino acid metabolic process	1.88976e-11	42	14	CAGL0B01122g,CAGL0C03443g,CAGL0D06402g,CAGL0F06875g,CAGL0F07029g,CAGL0G01903g,CAGL0G02585g,CAGL0H06369g,CAGL0J02882g,CAGL0J06402g,CAGL0J08316g,CAGL0J09240g,CAGL0K07788g,CAGL0L06094g,	33.3	10.33	16.24	1.23255e-09	2.21858e-08
GO:0009067	aspartate family amino acid biosynthetic process	2.08892e-11	35	13	CAGL0C03443g,CAGL0D06402g,CAGL0F06875g,CAGL0F07029g,CAGL0G01903g,CAGL0G02585g,CAGL0H06369g,CAGL0J02882g,CAGL0J06402g,CAGL0J08316g,CAGL0J09240g,CAGL0K07788g,CAGL0L06094g,	37.1	11.51	19.09	1.29073e-09	2.45239e-08
GO:0009123	nucleoside monophosphate metabolic process	4.18529e-11	91	19	CAGL0A03366g,CAGL0B02431g,CAGL0B02794g,CAGL0C01325g,CAGL0G10153g,CAGL0H00506g,CAGL0H02491g,CAGL0H05489g,CAGL0H07887g,CAGL0I00748g,CAGL0I03190g,CAGL0I04444g,CAGL0I04686g,CAGL0K04499g,CAGL0K10340g,CAGL0L06160g,CAGL0L09713g,CAGL0M09581g,CAGL0M13717g,	20.9	6.47	8.77	2.45676e-09	4.91353e-08
GO:0009150	purine ribonucleotide metabolic process	1.05329e-10	107	20	CAGL0A03366g,CAGL0B02431g,CAGL0B02794g,CAGL0C01325g,CAGL0G10153g,CAGL0H00506g,CAGL0H02491g,CAGL0H03993g,CAGL0H05489g,CAGL0H07887g,CAGL0I00748g,CAGL0I03190g,CAGL0I04444g,CAGL0I04686g,CAGL0K04499g,CAGL0K10340g,CAGL0L06160g,CAGL0L09713g,CAGL0M09581g,CAGL0M13717g,	18.7	5.79	7.67	5.84051e-09	1.23657e-07
GO:0055086	nucleobase-containing small molecule metabolic process	1.09447e-10	199	27	CAGL0A01023g,CAGL0A03366g,CAGL0B02431g,CAGL0B02794g,CAGL0C01325g,CAGL0C02321g,CAGL0D01034g,CAGL0D01562g,CAGL0G02189g,CAGL0G10153g,CAGL0H00506g,CAGL0H02491g,CAGL0H03993g,CAGL0H05137g,CAGL0H05489g,CAGL0H07887g,CAGL0I00748g,CAGL0I03190g,CAGL0I04444g,CAGL0I04686g,CAGL0K01683g,CAGL0K04499g,CAGL0K10340g,CAGL0L06160g,CAGL0L09713g,CAGL0M09581g,CAGL0M13717g,	13.6	4.2	5.4	5.84051e-09	1.28491e-07
GO:0006163	purine nucleotide metabolic process	1.25711e-10	108	20	CAGL0A03366g,CAGL0B02431g,CAGL0B02794g,CAGL0C01325g,CAGL0G10153g,CAGL0H00506g,CAGL0H02491g,CAGL0H03993g,CAGL0H05489g,CAGL0H07887g,CAGL0I00748g,CAGL0I03190g,CAGL0I04444g,CAGL0I04686g,CAGL0K04499g,CAGL0K10340g,CAGL0L06160g,CAGL0L09713g,CAGL0M09581g,CAGL0M13717g,	18.5	5.74	7.58	6.41675e-09	1.47585e-07
GO:0072521	purine-containing compound metabolic process	1.76712e-10	122	21	CAGL0A03366g,CAGL0B02431g,CAGL0B02794g,CAGL0C01325g,CAGL0G02189g,CAGL0G10153g,CAGL0H00506g,CAGL0H02491g,CAGL0H03993g,CAGL0H05489g,CAGL0H07887g,CAGL0I00748g,CAGL0I03190g,CAGL0I04444g,CAGL0I04686g,CAGL0K04499g,CAGL0K10340g,CAGL0L06160g,CAGL0L09713g,CAGL0M09581g,CAGL0M13717g,	17.2	5.33	6.97	8.64414e-09	2.07459e-07
GO:0006189	'de novo' IMP biosynthetic process	2.52121e-10	8	7	CAGL0A03366g,CAGL0B02794g,CAGL0H07887g,CAGL0I04444g,CAGL0K04499g,CAGL0K10340g,CAGL0M13717g,	87.5	27.1	218.75	1.18396e-08	2.9599e-07
GO:0009259	ribonucleotide metabolic process	2.95306e-10	113	20	CAGL0A03366g,CAGL0B02431g,CAGL0B02794g,CAGL0C01325g,CAGL0G10153g,CAGL0H00506g,CAGL0H02491g,CAGL0H03993g,CAGL0H05489g,CAGL0H07887g,CAGL0I00748g,CAGL0I03190g,CAGL0I04444g,CAGL0I04686g,CAGL0K04499g,CAGL0K10340g,CAGL0L06160g,CAGL0L09713g,CAGL0M09581g,CAGL0M13717g,	17.7	5.48	7.17	1.33342e-08	3.46689e-07
GO:0009117	nucleotide metabolic process	3.08076e-10	165	24	CAGL0A01023g,CAGL0A03366g,CAGL0B02431g,CAGL0B02794g,CAGL0C01325g,CAGL0C02321g,CAGL0G10153g,CAGL0H00506g,CAGL0H02491g,CAGL0H03993g,CAGL0H05137g,CAGL0H05489g,CAGL0H07887g,CAGL0I00748g,CAGL0I03190g,CAGL0I04444g,CAGL0I04686g,CAGL0K01683g,CAGL0K04499g,CAGL0K10340g,CAGL0L06160g,CAGL0L09713g,CAGL0M09581g,CAGL0M13717g,	14.5	4.51	5.77	1.33956e-08	3.61681e-07
GO:0006753	nucleoside phosphate metabolic process	7.41841e-10	172	24	CAGL0A01023g,CAGL0A03366g,CAGL0B02431g,CAGL0B02794g,CAGL0C01325g,CAGL0C02321g,CAGL0G10153g,CAGL0H00506g,CAGL0H02491g,CAGL0H03993g,CAGL0H05137g,CAGL0H05489g,CAGL0H07887g,CAGL0I00748g,CAGL0I03190g,CAGL0I04444g,CAGL0I04686g,CAGL0K01683g,CAGL0K04499g,CAGL0K10340g,CAGL0L06160g,CAGL0L09713g,CAGL0M09581g,CAGL0M13717g,	14	4.32	5.49	3.04911e-08	8.70921e-07
GO:0072350	tricarboxylic acid metabolic process	7.53188e-10	23	10	CAGL0A01045g,CAGL0B03663g,CAGL0B04917g,CAGL0D06424g,CAGL0E01287g,CAGL0F02431g,CAGL0G02673g,CAGL0G08712g,CAGL0H03993g,CAGL0J00847g,	43.5	13.47	24.43	3.04911e-08	8.84243e-07
GO:0000096	sulfur amino acid metabolic process	1.39287e-09	31	11	CAGL0B01122g,CAGL0B03839g,CAGL0D06402g,CAGL0F07029g,CAGL0G01903g,CAGL0H06369g,CAGL0J02882g,CAGL0J08316g,CAGL0L02321g,CAGL0L06094g,CAGL0M00374g,	35.5	10.99	17.55	5.45077e-08	1.63523e-06
GO:0019693	ribose phosphate metabolic process	2.54348e-09	127	20	CAGL0A03366g,CAGL0B02431g,CAGL0B02794g,CAGL0C01325g,CAGL0G10153g,CAGL0H00506g,CAGL0H02491g,CAGL0H03993g,CAGL0H05489g,CAGL0H07887g,CAGL0I00748g,CAGL0I03190g,CAGL0I04444g,CAGL0I04686g,CAGL0K04499g,CAGL0K10340g,CAGL0L06160g,CAGL0L09713g,CAGL0M09581g,CAGL0M13717g,	15.7	4.88	6.21	9.6324e-08	2.98605e-06
GO:0046040	IMP metabolic process	3.5795e-09	10	7	CAGL0A03366g,CAGL0B02794g,CAGL0H07887g,CAGL0I04444g,CAGL0K04499g,CAGL0K10340g,CAGL0M13717g,	70	21.68	72.89	1.27343e-07	4.20233e-06
GO:0006188	IMP biosynthetic process	3.5795e-09	10	7	CAGL0A03366g,CAGL0B02794g,CAGL0H07887g,CAGL0I04444g,CAGL0K04499g,CAGL0K10340g,CAGL0M13717g,	70	21.68	72.89	1.27343e-07	4.20233e-06
GO:0006101	citrate metabolic process	3.82282e-09	20	9	CAGL0A01045g,CAGL0B03663g,CAGL0D06424g,CAGL0E01287g,CAGL0F02431g,CAGL0G02673g,CAGL0G08712g,CAGL0H03993g,CAGL0J00847g,	45	13.94	25.83	1.32e-07	4.48799e-06
GO:0006544	glycine metabolic process	7.07697e-09	7	6	CAGL0D04356g,CAGL0F01749g,CAGL0I09284g,CAGL0K12518g,CAGL0L00429g,CAGL0M12188g,	85.7	26.55	186.36	2.37382e-07	8.30836e-06
GO:0006730	one-carbon metabolic process	9.57682e-09	11	7	CAGL0D04356g,CAGL0F01749g,CAGL0F07029g,CAGL0G02189g,CAGL0I09284g,CAGL0L00429g,CAGL0M12188g,	63.6	19.71	54.66	3.0892e-07	1.12432e-05
GO:1901566	organonitrogen compound biosynthetic process	9.73597e-09	689	50	CAGL0A00363g,CAGL0A01023g,CAGL0A02112g,CAGL0A02574g,CAGL0A03366g,CAGL0B00902g,CAGL0B02794g,CAGL0C01243g,CAGL0C03443g,CAGL0D01034g,CAGL0D01562g,CAGL0D06402g,CAGL0D06556g,CAGL0E05016g,CAGL0F01749g,CAGL0F02431g,CAGL0F06875g,CAGL0F07029g,CAGL0G01903g,CAGL0G02189g,CAGL0G02585g,CAGL0G05071g,CAGL0G06732g,CAGL0H00506g,CAGL0H03795g,CAGL0H05489g,CAGL0H06369g,CAGL0H07887g,CAGL0I04444g,CAGL0I04686g,CAGL0I092…	7.3	2.25	2.9	3.0892e-07	1.143e-05
GO:0006099	tricarboxylic acid cycle	5.59371e-08	19	8	CAGL0A01045g,CAGL0D06424g,CAGL0E01287g,CAGL0F02431g,CAGL0G02673g,CAGL0G08712g,CAGL0H03993g,CAGL0J00847g,	42.1	13.04	22.82	1.72816e-06	6.56701e-05
GO:0045333	cellular respiration	6.61703e-08	74	14	CAGL0A01045g,CAGL0B02431g,CAGL0C01325g,CAGL0D06424g,CAGL0E01287g,CAGL0F02431g,CAGL0G02673g,CAGL0G08712g,CAGL0G10153g,CAGL0H02491g,CAGL0H03993g,CAGL0I03190g,CAGL0J00847g,CAGL0L06160g,	18.9	5.86	7.53	1.9919e-06	7.7684e-05
GO:0006553	lysine metabolic process	8.0447e-08	9	6	CAGL0C03443g,CAGL0F06875g,CAGL0G02585g,CAGL0J06402g,CAGL0J09240g,CAGL0K07788g,	66.7	20.65	62.1	2.30353e-06	9.44448e-05
GO:0009085	lysine biosynthetic process	8.0447e-08	9	6	CAGL0C03443g,CAGL0F06875g,CAGL0G02585g,CAGL0J06402g,CAGL0J09240g,CAGL0K07788g,	66.7	20.65	62.1	2.30353e-06	9.44448e-05
GO:0009070	serine family amino acid biosynthetic process	9.17222e-08	14	7	CAGL0D06402g,CAGL0F01749g,CAGL0H06369g,CAGL0I09284g,CAGL0J02882g,CAGL0K12518g,CAGL0M12837g,	50	15.49	31.21	2.50802e-06	0.000107682
GO:0016999	antibiotic metabolic process	9.18609e-08	54	12	CAGL0A01045g,CAGL0B03663g,CAGL0D06424g,CAGL0E01287g,CAGL0F02431g,CAGL0G02673g,CAGL0G07271g,CAGL0G08712g,CAGL0H03993g,CAGL0H05137g,CAGL0I00748g,CAGL0J00847g,	22.2	6.88	9.14	2.50802e-06	0.000107845
GO:0015980	energy derivation by oxidation of organic compounds	1.16809e-07	102	16	CAGL0A01045g,CAGL0B02431g,CAGL0C01325g,CAGL0D06424g,CAGL0E01287g,CAGL0F02431g,CAGL0G02673g,CAGL0G08712g,CAGL0G10153g,CAGL0H02491g,CAGL0H02695g,CAGL0H03993g,CAGL0I00748g,CAGL0I03190g,CAGL0J00847g,CAGL0L06160g,	15.7	4.86	6.05	3.11668e-06	0.000137134
GO:0009168	purine ribonucleoside monophosphate biosynthetic process	1.41354e-07	56	12	CAGL0A03366g,CAGL0B02794g,CAGL0H00506g,CAGL0H05489g,CAGL0H07887g,CAGL0I04444g,CAGL0I04686g,CAGL0K04499g,CAGL0K10340g,CAGL0L09713g,CAGL0M09581g,CAGL0M13717g,	21.4	6.64	8.72	3.6076e-06	0.00016595
GO:0009127	purine nucleoside monophosphate biosynthetic process	1.41354e-07	56	12	CAGL0A03366g,CAGL0B02794g,CAGL0H00506g,CAGL0H05489g,CAGL0H07887g,CAGL0I04444g,CAGL0I04686g,CAGL0K04499g,CAGL0K10340g,CAGL0L09713g,CAGL0M09581g,CAGL0M13717g,	21.4	6.64	8.72	3.6076e-06	0.00016595
GO:0009156	ribonucleoside monophosphate biosynthetic process	2.60447e-07	59	12	CAGL0A03366g,CAGL0B02794g,CAGL0H00506g,CAGL0H05489g,CAGL0H07887g,CAGL0I04444g,CAGL0I04686g,CAGL0K04499g,CAGL0K10340g,CAGL0L09713g,CAGL0M09581g,CAGL0M13717g,	20.3	6.3	8.16	6.50565e-06	0.000305765
GO:0006091	generation of precursor metabolites and energy	3.08421e-07	123	17	CAGL0A01045g,CAGL0B02431g,CAGL0C01325g,CAGL0D06424g,CAGL0E01287g,CAGL0F02431g,CAGL0G02673g,CAGL0G08712g,CAGL0G10153g,CAGL0H00506g,CAGL0H02491g,CAGL0H02695g,CAGL0H03993g,CAGL0I00748g,CAGL0I03190g,CAGL0J00847g,CAGL0L06160g,	13.8	4.28	5.23	7.54346e-06	0.000362086
GO:0000097	sulfur amino acid biosynthetic process	3.24804e-07	23	8	CAGL0D06402g,CAGL0F07029g,CAGL0G01903g,CAGL0H06369g,CAGL0J02882g,CAGL0J08316g,CAGL0L06094g,CAGL0M00374g,	34.8	10.77	16.72	7.78203e-06	0.00038132
GO:0009124	nucleoside monophosphate biosynthetic process	3.83103e-07	61	12	CAGL0A03366g,CAGL0B02794g,CAGL0H00506g,CAGL0H05489g,CAGL0H07887g,CAGL0I04444g,CAGL0I04686g,CAGL0K04499g,CAGL0K10340g,CAGL0L09713g,CAGL0M09581g,CAGL0M13717g,	19.7	6.09	7.82	8.99526e-06	0.000449763
GO:0019878	lysine biosynthetic process via aminoadipic acid	6.59549e-07	7	5	CAGL0C03443g,CAGL0F06875g,CAGL0J06402g,CAGL0J09240g,CAGL0K07788g,	71.4	22.13	77.17	1.49858e-05	0.000774311
GO:0009060	aerobic respiration	6.63767e-07	64	12	CAGL0A01045g,CAGL0C01325g,CAGL0D06424g,CAGL0E01287g,CAGL0F02431g,CAGL0G02673g,CAGL0G08712g,CAGL0H02491g,CAGL0H03993g,CAGL0I03190g,CAGL0J00847g,CAGL0L06160g,	18.8	5.81	7.36	1.49858e-05	0.000779262
GO:0006555	methionine metabolic process	6.77878e-07	25	8	CAGL0B01122g,CAGL0D06402g,CAGL0F07029g,CAGL0G01903g,CAGL0H06369g,CAGL0J02882g,CAGL0J08316g,CAGL0L06094g,	32	9.91	14.75	1.50156e-05	0.000795828
GO:0046034	ATP metabolic process	7.91463e-07	65	12	CAGL0B02431g,CAGL0C01325g,CAGL0G10153g,CAGL0H00506g,CAGL0H02491g,CAGL0H05489g,CAGL0I00748g,CAGL0I03190g,CAGL0I04686g,CAGL0L06160g,CAGL0L09713g,CAGL0M09581g,	18.5	5.72	7.22	1.7207e-05	0.000929178
GO:0042133	neurotransmitter metabolic process	8.15946e-07	12	6	CAGL0D04356g,CAGL0F01749g,CAGL0I09284g,CAGL0K12518g,CAGL0L00429g,CAGL0M12188g,	50	15.49	31.03	1.74167e-05	0.000957921
GO:0072522	purine-containing compound biosynthetic process	9.28804e-07	78	13	CAGL0A03366g,CAGL0B02794g,CAGL0G02189g,CAGL0H00506g,CAGL0H05489g,CAGL0H07887g,CAGL0I04444g,CAGL0I04686g,CAGL0K04499g,CAGL0K10340g,CAGL0L09713g,CAGL0M09581g,CAGL0M13717g,	16.7	5.16	6.41	1.9371e-05	0.00109042
GO:0009205	purine ribonucleoside triphosphate metabolic process	9.40501e-07	66	12	CAGL0B02431g,CAGL0C01325g,CAGL0G10153g,CAGL0H00506g,CAGL0H02491g,CAGL0H05489g,CAGL0I00748g,CAGL0I03190g,CAGL0I04686g,CAGL0L06160g,CAGL0L09713g,CAGL0M09581g,	18.2	5.63	7.09	1.9371e-05	0.00110415
GO:0009199	ribonucleoside triphosphate metabolic process	1.11391e-06	67	12	CAGL0B02431g,CAGL0C01325g,CAGL0G10153g,CAGL0H00506g,CAGL0H02491g,CAGL0H05489g,CAGL0I00748g,CAGL0I03190g,CAGL0I04686g,CAGL0L06160g,CAGL0L09713g,CAGL0M09581g,	17.9	5.55	6.96	2.17955e-05	0.00130773
GO:0009144	purine nucleoside triphosphate metabolic process	1.11391e-06	67	12	CAGL0B02431g,CAGL0C01325g,CAGL0G10153g,CAGL0H00506g,CAGL0H02491g,CAGL0H05489g,CAGL0I00748g,CAGL0I03190g,CAGL0I04686g,CAGL0L06160g,CAGL0L09713g,CAGL0M09581g,	17.9	5.55	6.96	2.17955e-05	0.00130773
GO:0009152	purine ribonucleotide biosynthetic process	1.11391e-06	67	12	CAGL0A03366g,CAGL0B02794g,CAGL0H00506g,CAGL0H05489g,CAGL0H07887g,CAGL0I04444g,CAGL0I04686g,CAGL0K04499g,CAGL0K10340g,CAGL0L09713g,CAGL0M09581g,CAGL0M13717g,	17.9	5.55	6.96	2.17955e-05	0.00130773
GO:0044249	cellular biosynthetic process	1.1497e-06	1195	66	CAGL0A00363g,CAGL0A01023g,CAGL0A02112g,CAGL0A02574g,CAGL0A03366g,CAGL0B00902g,CAGL0B01122g,CAGL0B02794g,CAGL0C01243g,CAGL0C02321g,CAGL0C03443g,CAGL0D00528g,CAGL0D01034g,CAGL0D01562g,CAGL0D01716g,CAGL0D06402g,CAGL0D06556g,CAGL0E00737g,CAGL0E02453g,CAGL0E05016g,CAGL0F01749g,CAGL0F02431g,CAGL0F06875g,CAGL0F07029g,CAGL0G01903g,CAGL0G02189g,CAGL0G02585g,CAGL0G05071g,CAGL0G06732g,CAGL0H00506g,CAGL0H026…	5.5	1.71	2.23	2.2127e-05	0.00134975
GO:0006164	purine nucleotide biosynthetic process	1.31507e-06	68	12	CAGL0A03366g,CAGL0B02794g,CAGL0H00506g,CAGL0H05489g,CAGL0H07887g,CAGL0I04444g,CAGL0I04686g,CAGL0K04499g,CAGL0K10340g,CAGL0L09713g,CAGL0M09581g,CAGL0M13717g,	17.6	5.47	6.83	2.49016e-05	0.0015439
GO:0009260	ribonucleotide biosynthetic process	2.12492e-06	71	12	CAGL0A03366g,CAGL0B02794g,CAGL0H00506g,CAGL0H05489g,CAGL0H07887g,CAGL0I04444g,CAGL0I04686g,CAGL0K04499g,CAGL0K10340g,CAGL0L09713g,CAGL0M09581g,CAGL0M13717g,	16.9	5.24	6.48	3.93392e-05	0.00249465
GO:1901576	organic substance biosynthetic process	2.14456e-06	1215	66	CAGL0A00363g,CAGL0A01023g,CAGL0A02112g,CAGL0A02574g,CAGL0A03366g,CAGL0B00902g,CAGL0B01122g,CAGL0B02794g,CAGL0C01243g,CAGL0C02321g,CAGL0C03443g,CAGL0D00528g,CAGL0D01034g,CAGL0D01562g,CAGL0D01716g,CAGL0D06402g,CAGL0D06556g,CAGL0E00737g,CAGL0E02453g,CAGL0E05016g,CAGL0F01749g,CAGL0F02431g,CAGL0F06875g,CAGL0F07029g,CAGL0G01903g,CAGL0G02189g,CAGL0G02585g,CAGL0G05071g,CAGL0G06732g,CAGL0H00506g,CAGL0H026…	5.4	1.68	2.18	3.93392e-05	0.00251771
GO:0006790	sulfur compound metabolic process	2.40672e-06	98	14	CAGL0B01122g,CAGL0B03839g,CAGL0D05280g,CAGL0D06402g,CAGL0F07029g,CAGL0G01903g,CAGL0H03993g,CAGL0H06369g,CAGL0J02882g,CAGL0J08316g,CAGL0L02321g,CAGL0L06094g,CAGL0M00374g,CAGL0M02629g,	14.3	4.43	5.35	4.3469e-05	0.00282549
GO:0001505	regulation of neurotransmitter levels	2.51233e-06	14	6	CAGL0D04356g,CAGL0F01749g,CAGL0I09284g,CAGL0K12518g,CAGL0L00429g,CAGL0M12188g,	42.9	13.28	23.26	4.4689e-05	0.00294947
GO:0009141	nucleoside triphosphate metabolic process	2.88456e-06	73	12	CAGL0B02431g,CAGL0C01325g,CAGL0G10153g,CAGL0H00506g,CAGL0H02491g,CAGL0H05489g,CAGL0I00748g,CAGL0I03190g,CAGL0I04686g,CAGL0L06160g,CAGL0L09713g,CAGL0M09581g,	16.4	5.09	6.27	5.05443e-05	0.00338647
GO:0009086	methionine biosynthetic process	3.66022e-06	22	7	CAGL0D06402g,CAGL0F07029g,CAGL0G01903g,CAGL0H06369g,CAGL0J02882g,CAGL0J08316g,CAGL0L06094g,	31.8	9.86	14.54	6.22767e-05	0.0042971
GO:0006119	oxidative phosphorylation	3.66022e-06	22	7	CAGL0B02431g,CAGL0C01325g,CAGL0G10153g,CAGL0H00506g,CAGL0H02491g,CAGL0I03190g,CAGL0L06160g,	31.8	9.86	14.54	6.22767e-05	0.0042971
GO:0046390	ribose phosphate biosynthetic process	3.8744e-06	75	12	CAGL0A03366g,CAGL0B02794g,CAGL0H00506g,CAGL0H05489g,CAGL0H07887g,CAGL0I04444g,CAGL0I04686g,CAGL0K04499g,CAGL0K10340g,CAGL0L09713g,CAGL0M09581g,CAGL0M13717g,	16	4.96	6.07	6.49793e-05	0.00454855
GO:0009058	biosynthetic process	4.03455e-06	1236	66	CAGL0A00363g,CAGL0A01023g,CAGL0A02112g,CAGL0A02574g,CAGL0A03366g,CAGL0B00902g,CAGL0B01122g,CAGL0B02794g,CAGL0C01243g,CAGL0C02321g,CAGL0C03443g,CAGL0D00528g,CAGL0D01034g,CAGL0D01562g,CAGL0D01716g,CAGL0D06402g,CAGL0D06556g,CAGL0E00737g,CAGL0E02453g,CAGL0E05016g,CAGL0F01749g,CAGL0F02431g,CAGL0F06875g,CAGL0F07029g,CAGL0G01903g,CAGL0G02189g,CAGL0G02585g,CAGL0G05071g,CAGL0G06732g,CAGL0H00506g,CAGL0H026…	5.3	1.65	2.13	6.67121e-05	0.00473656
GO:0022900	electron transport chain	5.11946e-06	23	7	CAGL0B02431g,CAGL0C01325g,CAGL0G10153g,CAGL0H02491g,CAGL0I03190g,CAGL0J00847g,CAGL0L06160g,	30.4	9.43	13.63	8.34757e-05	0.00601025
GO:0019637	organophosphate metabolic process	6.55555e-06	314	26	CAGL0A01023g,CAGL0A03366g,CAGL0B02431g,CAGL0B02794g,CAGL0C01325g,CAGL0C02321g,CAGL0G08195g,CAGL0G10153g,CAGL0H00506g,CAGL0H02491g,CAGL0H03993g,CAGL0H05137g,CAGL0H05489g,CAGL0H07887g,CAGL0I00748g,CAGL0I03190g,CAGL0I04444g,CAGL0I04686g,CAGL0I06050g,CAGL0K01683g,CAGL0K04499g,CAGL0K10340g,CAGL0L06160g,CAGL0L09713g,CAGL0M09581g,CAGL0M13717g,	8.3	2.56	3.01	0.000105428	0.00769621
GO:0000103	sulfate assimilation	7.31109e-06	10	5	CAGL0B03839g,CAGL0D05280g,CAGL0G01903g,CAGL0L02321g,CAGL0M00374g,	50	15.49	30.85	0.000115989	0.00858322
GO:0009165	nucleotide biosynthetic process	1.28861e-05	98	13	CAGL0A01023g,CAGL0A03366g,CAGL0B02794g,CAGL0H00506g,CAGL0H05489g,CAGL0H07887g,CAGL0I04444g,CAGL0I04686g,CAGL0K04499g,CAGL0K10340g,CAGL0L09713g,CAGL0M09581g,CAGL0M13717g,	13.3	4.11	4.88	0.00020171	0.0151282
GO:1901293	nucleoside phosphate biosynthetic process	1.79839e-05	101	13	CAGL0A01023g,CAGL0A03366g,CAGL0B02794g,CAGL0H00506g,CAGL0H05489g,CAGL0H07887g,CAGL0I04444g,CAGL0I04686g,CAGL0K04499g,CAGL0K10340g,CAGL0L09713g,CAGL0M09581g,CAGL0M13717g,	12.9	3.99	4.71	0.000277804	0.0211131
GO:0044272	sulfur compound biosynthetic process	2.47208e-05	50	9	CAGL0B01122g,CAGL0D06402g,CAGL0F07029g,CAGL0G01903g,CAGL0H06369g,CAGL0J02882g,CAGL0J08316g,CAGL0L06094g,CAGL0M00374g,	18	5.58	6.89	0.000376912	0.0290222
GO:0055085	transmembrane transport	2.91274e-05	321	25	CAGL0B02475g,CAGL0B02838g,CAGL0D02640g,CAGL0D02662g,CAGL0E01353g,CAGL0E05632g,CAGL0F00231g,CAGL0F08085g,CAGL0H00506g,CAGL0H05489g,CAGL0I04686g,CAGL0I05918g,CAGL0I07689g,CAGL0J02948g,CAGL0J03850g,CAGL0J09790g,CAGL0K01683g,CAGL0K04367g,CAGL0K07436g,CAGL0K11616g,CAGL0L02079g,CAGL0L06138g,CAGL0L09713g,CAGL0L10868g,CAGL0M09581g,	7.8	2.41	2.79	0.000438405	0.0341956
GO:0006546	glycine catabolic process	3.30741e-05	3	3	CAGL0D04356g,CAGL0L00429g,CAGL0M12188g,	100	30.98	inf	0.000491506	0.038829
GO:0019438	aromatic compound biosynthetic process	3.69037e-05	452	31	CAGL0A01023g,CAGL0A02574g,CAGL0A03366g,CAGL0B00902g,CAGL0B02794g,CAGL0C01243g,CAGL0C02321g,CAGL0D01034g,CAGL0D01562g,CAGL0D01716g,CAGL0E00737g,CAGL0E02453g,CAGL0E05016g,CAGL0G01903g,CAGL0G02189g,CAGL0H00506g,CAGL0H03993g,CAGL0H05489g,CAGL0H07887g,CAGL0I04444g,CAGL0I04686g,CAGL0J04070g,CAGL0K04499g,CAGL0K10340g,CAGL0L00759g,CAGL0L02937g,CAGL0L09713g,CAGL0M03487g,CAGL0M06677g,CAGL0M09581g,CAGL0M137…	6.9	2.12	2.47	0.000538159	0.043325
GO:0042773	ATP synthesis coupled electron transport	3.75886e-05	21	6	CAGL0B02431g,CAGL0C01325g,CAGL0G10153g,CAGL0H02491g,CAGL0I03190g,CAGL0L06160g,	28.6	8.85	12.39	0.000538159	0.0441291
GO:0042775	mitochondrial ATP synthesis coupled electron transport	3.75886e-05	21	6	CAGL0B02431g,CAGL0C01325g,CAGL0G10153g,CAGL0H02491g,CAGL0I03190g,CAGL0L06160g,	28.6	8.85	12.39	0.000538159	0.0441291
GO:1901135	carbohydrate derivative metabolic process	4.97061e-05	311	24	CAGL0A03366g,CAGL0B02431g,CAGL0B02794g,CAGL0C01325g,CAGL0D01034g,CAGL0D01562g,CAGL0G09449g,CAGL0G10153g,CAGL0H00506g,CAGL0H02491g,CAGL0H03993g,CAGL0H05489g,CAGL0H07887g,CAGL0I00748g,CAGL0I03190g,CAGL0I04444g,CAGL0I04686g,CAGL0K01683g,CAGL0K04499g,CAGL0K10340g,CAGL0L06160g,CAGL0L09713g,CAGL0M09581g,CAGL0M13717g,	7.7	2.39	2.75	0.000694895	0.0583549
GO:0009073	aromatic amino acid family biosynthetic process	5.03118e-05	22	6	CAGL0A02574g,CAGL0B00902g,CAGL0C01243g,CAGL0E05016g,CAGL0L00759g,CAGL0L02937g,	27.3	8.45	11.61	0.000694895	0.059066
GO:0022904	respiratory electron transport chain	5.03118e-05	22	6	CAGL0B02431g,CAGL0C01325g,CAGL0G10153g,CAGL0H02491g,CAGL0I03190g,CAGL0L06160g,	27.3	8.45	11.61	0.000694895	0.059066
GO:0009113	purine nucleobase biosynthetic process	5.2266e-05	14	5	CAGL0G02189g,CAGL0H07887g,CAGL0I04444g,CAGL0K10340g,CAGL0M13717g,	35.7	11.06	17.13	0.000713491	0.0613603
GO:0000105	histidine biosynthetic process	6.63381e-05	8	4	CAGL0B00902g,CAGL0C01243g,CAGL0L00759g,CAGL0L02937g,	50	15.49	30.67	0.000895183	0.0778809
GO:0034220	ion transmembrane transport	7.25935e-05	115	13	CAGL0B02475g,CAGL0E01353g,CAGL0F00231g,CAGL0F08085g,CAGL0H00506g,CAGL0H05489g,CAGL0I04686g,CAGL0I07689g,CAGL0K04367g,CAGL0K07436g,CAGL0L02079g,CAGL0L09713g,CAGL0M09581g,	11.3	3.5	4.05	0.000968464	0.0852248
GO:0052803	imidazole-containing compound metabolic process	0.000116406	9	4	CAGL0B00902g,CAGL0C01243g,CAGL0L00759g,CAGL0L02937g,	44.4	13.77	24.53	0.00151845	0.13666
GO:0006547	histidine metabolic process	0.000116406	9	4	CAGL0B00902g,CAGL0C01243g,CAGL0L00759g,CAGL0L02937g,	44.4	13.77	24.53	0.00151845	0.13666
GO:0009071	serine family amino acid catabolic process	0.000129148	4	3	CAGL0D04356g,CAGL0L00429g,CAGL0M12188g,	75	23.23	91.52	0.00164804	0.151619
GO:0006545	glycine biosynthetic process	0.000129148	4	3	CAGL0F01749g,CAGL0I09284g,CAGL0K12518g,	75	23.23	91.52	0.00164804	0.151619
GO:0018130	heterocycle biosynthetic process	0.000181214	469	30	CAGL0A01023g,CAGL0A02574g,CAGL0A03366g,CAGL0B00902g,CAGL0B02794g,CAGL0C01243g,CAGL0C02321g,CAGL0D01034g,CAGL0D01562g,CAGL0D01716g,CAGL0E00737g,CAGL0E02453g,CAGL0G01903g,CAGL0G02189g,CAGL0H00506g,CAGL0H03993g,CAGL0H05489g,CAGL0H07887g,CAGL0I04444g,CAGL0I04686g,CAGL0J04070g,CAGL0K04499g,CAGL0K10340g,CAGL0L00759g,CAGL0L02937g,CAGL0L09713g,CAGL0M03487g,CAGL0M06677g,CAGL0M09581g,CAGL0M13717g,	6.4	1.98	2.27	0.00228758	0.212745
GO:0046083	adenine metabolic process	0.000189136	10	4	CAGL0H07887g,CAGL0I04444g,CAGL0K10340g,CAGL0M13717g,	40	12.39	20.44	0.00233732	0.222045
GO:0009092	homoserine metabolic process	0.000189136	10	4	CAGL0H06369g,CAGL0J02882g,CAGL0J08316g,CAGL0L06094g,	40	12.39	20.44	0.00233732	0.222045
GO:0006144	purine nucleobase metabolic process	0.000201339	18	5	CAGL0G02189g,CAGL0H07887g,CAGL0I04444g,CAGL0K10340g,CAGL0M13717g,	27.8	8.6	11.85	0.00246221	0.236372
GO:0009112	nucleobase metabolic process	0.000216211	28	6	CAGL0D01562g,CAGL0G02189g,CAGL0H07887g,CAGL0I04444g,CAGL0K10340g,CAGL0M13717g,	21.4	6.64	8.44	0.00261682	0.253831
GO:0015985	energy coupled proton transport, down electrochemical gradient	0.000266162	19	5	CAGL0H00506g,CAGL0H05489g,CAGL0I04686g,CAGL0L09713g,CAGL0M09581g,	26.3	8.15	11	0.00315631	0.312474
GO:0015986	ATP synthesis coupled proton transport	0.000266162	19	5	CAGL0H00506g,CAGL0H05489g,CAGL0I04686g,CAGL0L09713g,CAGL0M09581g,	26.3	8.15	11	0.00315631	0.312474
GO:0042136	neurotransmitter biosynthetic process	0.000315196	5	3	CAGL0F01749g,CAGL0I09284g,CAGL0K12518g,	60	18.59	45.75	0.00362784	0.37004
GO:0009098	leucine biosynthetic process	0.000315196	5	3	CAGL0A00363g,CAGL0G06732g,CAGL0H03795g,	60	18.59	45.75	0.00362784	0.37004
GO:0006106	fumarate metabolic process	0.000315196	5	3	CAGL0A01045g,CAGL0B02794g,CAGL0I04444g,	60	18.59	45.75	0.00362784	0.37004
GO:1901564	organonitrogen compound metabolic process	0.000319405	1519	70	CAGL0A00363g,CAGL0A01023g,CAGL0A02112g,CAGL0A02574g,CAGL0A03366g,CAGL0B00902g,CAGL0B01122g,CAGL0B02431g,CAGL0B02794g,CAGL0B03839g,CAGL0C01243g,CAGL0C01325g,CAGL0C03443g,CAGL0D01034g,CAGL0D01562g,CAGL0D04356g,CAGL0D06402g,CAGL0D06556g,CAGL0E05016g,CAGL0F01749g,CAGL0F02431g,CAGL0F06721g,CAGL0F06875g,CAGL0F07029g,CAGL0G01903g,CAGL0G02189g,CAGL0G02585g,CAGL0G05071g,CAGL0G06732g,CAGL0G09449g,CAGL0G101…	4.6	1.43	1.76	0.00364059	0.374981
GO:0009072	aromatic amino acid family metabolic process	0.00032297	30	6	CAGL0A02574g,CAGL0B00902g,CAGL0C01243g,CAGL0E05016g,CAGL0L00759g,CAGL0L02937g,	20	6.2	7.73	0.00364584	0.379167
GO:1901362	organic cyclic compound biosynthetic process	0.00034961	510	31	CAGL0A01023g,CAGL0A02574g,CAGL0A03366g,CAGL0B00902g,CAGL0B02794g,CAGL0C01243g,CAGL0C02321g,CAGL0D01034g,CAGL0D01562g,CAGL0D01716g,CAGL0E00737g,CAGL0E02453g,CAGL0E05016g,CAGL0G01903g,CAGL0G02189g,CAGL0H00506g,CAGL0H03993g,CAGL0H05489g,CAGL0H07887g,CAGL0I04444g,CAGL0I04686g,CAGL0J04070g,CAGL0K04499g,CAGL0K10340g,CAGL0L00759g,CAGL0L02937g,CAGL0L09713g,CAGL0M03487g,CAGL0M06677g,CAGL0M09581g,CAGL0M137…	6.1	1.88	2.15	0.00390898	0.410443
GO:0046148	pigment biosynthetic process	0.000467186	32	6	CAGL0G01903g,CAGL0G02189g,CAGL0H07887g,CAGL0I04444g,CAGL0K10340g,CAGL0M13717g,	18.8	5.81	7.13	0.0051743	0.548476
GO:0046112	nucleobase biosynthetic process	0.000557164	22	5	CAGL0G02189g,CAGL0H07887g,CAGL0I04444g,CAGL0K10340g,CAGL0M13717g,	22.7	7.04	9.05	0.00611318	0.654111
GO:0009082	branched-chain amino acid biosynthetic process	0.000596726	13	4	CAGL0A00363g,CAGL0G06732g,CAGL0H03795g,CAGL0K03465g,	30.8	9.53	13.62	0.00648663	0.700556
GO:0042135	neurotransmitter catabolic process	0.000615433	6	3	CAGL0D04356g,CAGL0L00429g,CAGL0M12188g,	50	15.49	30.49	0.00650917	0.722518
GO:0050667	homocysteine metabolic process	0.000615433	6	3	CAGL0D06402g,CAGL0H06369g,CAGL0L06094g,	50	15.49	30.49	0.00650917	0.722518
GO:0006534	cysteine metabolic process	0.000615433	6	3	CAGL0D06402g,CAGL0H06369g,CAGL0L06094g,	50	15.49	30.49	0.00650917	0.722518
GO:0042440	pigment metabolic process	0.000657224	34	6	CAGL0G01903g,CAGL0G02189g,CAGL0H07887g,CAGL0I04444g,CAGL0K10340g,CAGL0M13717g,	17.6	5.47	6.62	0.00688911	0.77158
GO:0098656	anion transmembrane transport	0.000682677	47	7	CAGL0B02475g,CAGL0F00231g,CAGL0F08085g,CAGL0I07689g,CAGL0K04367g,CAGL0K07436g,CAGL0L02079g,	14.9	4.61	5.43	0.0070926	0.801463
GO:0035999	tetrahydrofolate interconversion	0.00103626	2	2	CAGL0F01749g,CAGL0I09284g,	100	30.98	inf	0.00995522	1
GO:1990546	mitochondrial tricarboxylic acid transmembrane transport	0.00103626	2	2	CAGL0K07436g,CAGL0L02079g,	100	30.98	inf	0.00995522	1
GO:0006843	mitochondrial citrate transmembrane transport	0.00103626	2	2	CAGL0K07436g,CAGL0L02079g,	100	30.98	inf	0.00995522	1
GO:0035674	tricarboxylic acid transmembrane transport	0.00103626	2	2	CAGL0K07436g,CAGL0L02079g,	100	30.98	inf	0.00995522	1
GO:0006842	tricarboxylic acid transport	0.00103626	2	2	CAGL0K07436g,CAGL0L02079g,	100	30.98	inf	0.00995522	1
GO:0015746	citrate transport	0.00103626	2	2	CAGL0K07436g,CAGL0L02079g,	100	30.98	inf	0.00995522	1
GO:0019264	glycine biosynthetic process from serine	0.00103626	2	2	CAGL0F01749g,CAGL0I09284g,	100	30.98	inf	0.00995522	1
GO:0019464	glycine decarboxylation via glycine cleavage system	0.00103626	2	2	CAGL0L00429g,CAGL0M12188g,	100	30.98	inf	0.00995522	1
GO:0006563	L-serine metabolic process	0.00105149	7	3	CAGL0D06402g,CAGL0F01749g,CAGL0I09284g,	42.9	13.28	22.87	0.00995522	1
GO:0006116	NADH oxidation	0.00105149	7	3	CAGL0B02431g,CAGL0I00748g,CAGL0K01683g,	42.9	13.28	22.87	0.00995522	1
GO:0006551	leucine metabolic process	0.00105149	7	3	CAGL0A00363g,CAGL0G06732g,CAGL0H03795g,	42.9	13.28	22.87	0.00995522	1
GO:0009081	branched-chain amino acid metabolic process	0.00108293	15	4	CAGL0A00363g,CAGL0G06732g,CAGL0H03795g,CAGL0K03465g,	26.7	8.26	11.14	0.0101709	1
GO:0006811	ion transport	0.00152266	237	17	CAGL0B02475g,CAGL0E01353g,CAGL0E05632g,CAGL0F00231g,CAGL0F08085g,CAGL0G08195g,CAGL0H00506g,CAGL0H05489g,CAGL0I04686g,CAGL0I07689g,CAGL0K04367g,CAGL0K07436g,CAGL0K11616g,CAGL0L02079g,CAGL0L09713g,CAGL0L10868g,CAGL0M09581g,	7.2	2.22	2.46	0.0141873	1
GO:0046084	adenine biosynthetic process	0.00164258	8	3	CAGL0H07887g,CAGL0I04444g,CAGL0K10340g,	37.5	11.62	18.29	0.0151841	1
GO:0042407	cristae formation	0.00240566	9	3	CAGL0B00396g,CAGL0G08195g,CAGL0I09262g,	33.3	10.33	15.24	0.0220644	1
GO:0043648	dicarboxylic acid metabolic process	0.00244636	30	5	CAGL0A01045g,CAGL0B02794g,CAGL0E01287g,CAGL0I04444g,CAGL0K05357g,	16.7	5.16	6.15	0.0222638	1
GO:0051186	cofactor metabolic process	0.00254875	186	14	CAGL0A01023g,CAGL0B01122g,CAGL0B02431g,CAGL0E01287g,CAGL0F01749g,CAGL0G01903g,CAGL0G02189g,CAGL0G07271g,CAGL0H03993g,CAGL0H05137g,CAGL0I00748g,CAGL0I09284g,CAGL0K01683g,CAGL0M02629g,	7.5	2.33	2.57	0.0230172	1
GO:0034654	nucleobase-containing compound biosynthetic process	0.00274912	385	23	CAGL0A01023g,CAGL0A03366g,CAGL0B02794g,CAGL0C02321g,CAGL0D01034g,CAGL0D01562g,CAGL0D01716g,CAGL0E00737g,CAGL0E02453g,CAGL0H00506g,CAGL0H03993g,CAGL0H05489g,CAGL0H07887g,CAGL0I04444g,CAGL0I04686g,CAGL0J04070g,CAGL0K04499g,CAGL0K10340g,CAGL0L09713g,CAGL0M03487g,CAGL0M06677g,CAGL0M09581g,CAGL0M13717g,	6	1.85	2.05	0.0246371	1
GO:0015849	organic acid transport	0.00324206	61	7	CAGL0E05632g,CAGL0F08085g,CAGL0I07689g,CAGL0K04367g,CAGL0K07436g,CAGL0K11616g,CAGL0L02079g,	11.5	3.55	4.01	0.0286179	1
GO:0046942	carboxylic acid transport	0.00324206	61	7	CAGL0E05632g,CAGL0F08085g,CAGL0I07689g,CAGL0K04367g,CAGL0K07436g,CAGL0K11616g,CAGL0L02079g,	11.5	3.55	4.01	0.0286179	1
GO:0019646	aerobic electron transport chain	0.0033556	10	3	CAGL0C01325g,CAGL0H02491g,CAGL0L06160g,	30	9.29	13.06	0.0291813	1
GO:0006123	mitochondrial electron transport, cytochrome c to oxygen	0.0033556	10	3	CAGL0C01325g,CAGL0H02491g,CAGL0L06160g,	30	9.29	13.06	0.0291813	1
GO:0090407	organophosphate biosynthetic process	0.00392746	195	14	CAGL0A01023g,CAGL0A03366g,CAGL0B02794g,CAGL0H00506g,CAGL0H05489g,CAGL0H07887g,CAGL0I04444g,CAGL0I04686g,CAGL0I06050g,CAGL0K04499g,CAGL0K10340g,CAGL0L09713g,CAGL0M09581g,CAGL0M13717g,	7.2	2.22	2.44	0.0339032	1
GO:0019674	NAD metabolic process	0.00408126	21	4	CAGL0A01023g,CAGL0B02431g,CAGL0I00748g,CAGL0K01683g,	19	5.9	7.2	0.0349206	1
GO:0006793	phosphorus metabolic process	0.00410481	518	28	CAGL0A01023g,CAGL0A03366g,CAGL0B02431g,CAGL0B02475g,CAGL0B02794g,CAGL0C01325g,CAGL0C02321g,CAGL0G08195g,CAGL0G10153g,CAGL0H00506g,CAGL0H02491g,CAGL0H03993g,CAGL0H05137g,CAGL0H05489g,CAGL0H07887g,CAGL0I00748g,CAGL0I03190g,CAGL0I04444g,CAGL0I04686g,CAGL0I06050g,CAGL0K01661g,CAGL0K01683g,CAGL0K04499g,CAGL0K10340g,CAGL0L06160g,CAGL0L09713g,CAGL0M09581g,CAGL0M13717g,	5.4	1.67	1.85	0.0349206	1
GO:1905039	carboxylic acid transmembrane transport	0.00430471	34	5	CAGL0F08085g,CAGL0I07689g,CAGL0K04367g,CAGL0K07436g,CAGL0L02079g,	14.7	4.56	5.29	0.0360981	1
GO:1903825	organic acid transmembrane transport	0.00430471	34	5	CAGL0F08085g,CAGL0I07689g,CAGL0K04367g,CAGL0K07436g,CAGL0L02079g,	14.7	4.56	5.29	0.0360981	1
GO:0006734	NADH metabolic process	0.0045053	11	3	CAGL0B02431g,CAGL0I00748g,CAGL0K01683g,	27.3	8.45	11.42	0.0375122	1
GO:0045229	external encapsulating structure organization	0.0049023	179	13	CAGL0C02211g,CAGL0E04620g,CAGL0F08833g,CAGL0G00286g,CAGL0G07271g,CAGL0G08668g,CAGL0G09449g,CAGL0H06413g,CAGL0I06182g,CAGL0J09922g,CAGL0L01551g,CAGL0L07502g,CAGL0M01826g,	7.3	2.25	2.46	0.0402469	1
GO:0071555	cell wall organization	0.0049023	179	13	CAGL0C02211g,CAGL0E04620g,CAGL0F08833g,CAGL0G00286g,CAGL0G07271g,CAGL0G08668g,CAGL0G09449g,CAGL0H06413g,CAGL0I06182g,CAGL0J09922g,CAGL0L01551g,CAGL0L07502g,CAGL0M01826g,	7.3	2.25	2.46	0.0402469	1
GO:1990542	mitochondrial transmembrane transport	0.00559666	51	6	CAGL0F08085g,CAGL0H00506g,CAGL0I05918g,CAGL0J03850g,CAGL0K07436g,CAGL0L02079g,	11.8	3.64	4.11	0.0456283	1
GO:0006796	phosphate-containing compound metabolic process	0.00576697	506	27	CAGL0A01023g,CAGL0A03366g,CAGL0B02431g,CAGL0B02794g,CAGL0C01325g,CAGL0C02321g,CAGL0G08195g,CAGL0G10153g,CAGL0H00506g,CAGL0H02491g,CAGL0H03993g,CAGL0H05137g,CAGL0H05489g,CAGL0H07887g,CAGL0I00748g,CAGL0I03190g,CAGL0I04444g,CAGL0I04686g,CAGL0I06050g,CAGL0K01661g,CAGL0K01683g,CAGL0K04499g,CAGL0K10340g,CAGL0L06160g,CAGL0L09713g,CAGL0M09581g,CAGL0M13717g,	5.3	1.65	1.82	0.0466163	1
GO:0006760	folic acid-containing compound metabolic process	0.00586582	12	3	CAGL0F01749g,CAGL0G02189g,CAGL0I09284g,	25	7.74	10.15	0.0466163	1
GO:0019419	sulfate reduction	0.00595609	4	2	CAGL0B03839g,CAGL0L02321g,	50	15.49	30.32	0.0466163	1
GO:0019344	cysteine biosynthetic process	0.00595609	4	2	CAGL0D06402g,CAGL0H06369g,	50	15.49	30.32	0.0466163	1
GO:0019346	transsulfuration	0.00595609	4	2	CAGL0H06369g,CAGL0L06094g,	50	15.49	30.32	0.0466163	1
GO:0019379	sulfate assimilation, phosphoadenylyl sulfate reduction by phosphoadenylyl-sulfate reductase (thioredoxin)	0.00595609	4	2	CAGL0B03839g,CAGL0L02321g,	50	15.49	30.32	0.0466163	1
GO:1902600	proton transmembrane transport	0.00623854	37	5	CAGL0H00506g,CAGL0H05489g,CAGL0I04686g,CAGL0L09713g,CAGL0M09581g,	13.5	4.19	4.79	0.0485036	1
GO:0042737	drug catabolic process	0.00672029	24	4	CAGL0D04356g,CAGL0G07271g,CAGL0L00429g,CAGL0M12188g,	16.7	5.16	6.11	0.0519054	1
GO:0098660	inorganic ion transmembrane transport	0.00699106	70	7	CAGL0E01353g,CAGL0F00231g,CAGL0H00506g,CAGL0H05489g,CAGL0I04686g,CAGL0L09713g,CAGL0M09581g,	10	3.1	3.43	0.0536439	1
GO:0006732	coenzyme metabolic process	0.00719024	126	10	CAGL0A01023g,CAGL0B01122g,CAGL0B02431g,CAGL0F01749g,CAGL0G02189g,CAGL0H03993g,CAGL0H05137g,CAGL0I00748g,CAGL0I09284g,CAGL0K01683g,	7.9	2.46	2.68	0.0548139	1
GO:0042558	pteridine-containing compound metabolic process	0.00744655	13	3	CAGL0F01749g,CAGL0G02189g,CAGL0I09284g,	23.1	7.15	9.14	0.0564016	1
GO:0006820	anion transport	0.00759233	127	10	CAGL0B02475g,CAGL0E05632g,CAGL0F00231g,CAGL0F08085g,CAGL0G08195g,CAGL0I07689g,CAGL0K04367g,CAGL0K07436g,CAGL0K11616g,CAGL0L02079g,	7.9	2.44	2.66	0.0571372	1
GO:0006754	ATP biosynthetic process	0.00782437	39	5	CAGL0H00506g,CAGL0H05489g,CAGL0I04686g,CAGL0L09713g,CAGL0M09581g,	12.8	3.97	4.51	0.058138	1
GO:0000002	mitochondrial genome maintenance	0.00782437	39	5	CAGL0D06424g,CAGL0E01287g,CAGL0I05918g,CAGL0J09790g,CAGL0K07436g,	12.8	3.97	4.51	0.058138	1
GO:0009206	purine ribonucleoside triphosphate biosynthetic process	0.00871385	40	5	CAGL0H00506g,CAGL0H05489g,CAGL0I04686g,CAGL0L09713g,CAGL0M09581g,	12.5	3.87	4.38	0.0639379	1
GO:0009145	purine nucleoside triphosphate biosynthetic process	0.00871385	40	5	CAGL0H00506g,CAGL0H05489g,CAGL0I04686g,CAGL0L09713g,CAGL0M09581g,	12.5	3.87	4.38	0.0639379	1
GO:0009201	ribonucleoside triphosphate biosynthetic process	0.00967095	41	5	CAGL0H00506g,CAGL0H05489g,CAGL0I04686g,CAGL0L09713g,CAGL0M09581g,	12.2	3.78	4.26	0.069984	1
GO:0006817	phosphate ion transport	0.00971669	5	2	CAGL0B02475g,CAGL0F00231g,	40	12.39	20.21	0.069984	1
GO:0006102	isocitrate metabolic process	0.00971669	5	2	CAGL0B04917g,CAGL0G02673g,	40	12.39	20.21	0.069984	1
GO:0031505	fungal-type cell wall organization	0.0105511	175	12	CAGL0E04620g,CAGL0F08833g,CAGL0G00286g,CAGL0G07271g,CAGL0G08668g,CAGL0G09449g,CAGL0H06413g,CAGL0I06182g,CAGL0J09922g,CAGL0L01551g,CAGL0L07502g,CAGL0M01826g,	6.9	2.12	2.3	0.0755304	1
GO:0009142	nucleoside triphosphate biosynthetic process	0.0129712	44	5	CAGL0H00506g,CAGL0H05489g,CAGL0I04686g,CAGL0L09713g,CAGL0M09581g,	11.4	3.52	3.93	0.0922918	1
GO:0006812	cation transport	0.0132547	138	10	CAGL0B02475g,CAGL0E01353g,CAGL0E05632g,CAGL0H00506g,CAGL0H05489g,CAGL0I04686g,CAGL0K04367g,CAGL0L09713g,CAGL0L10868g,CAGL0M09581g,	7.2	2.24	2.43	0.0937413	1
GO:0098655	cation transmembrane transport	0.0141695	80	7	CAGL0E01353g,CAGL0H00506g,CAGL0H05489g,CAGL0I04686g,CAGL0K04367g,CAGL0L09713g,CAGL0M09581g,	8.8	2.71	2.95	0.0996109	1
GO:0046653	tetrahydrofolate metabolic process	0.0142673	6	2	CAGL0F01749g,CAGL0I09284g,	33.3	10.33	15.15	0.0997014	1
GO:0015698	inorganic anion transport	0.0161063	17	3	CAGL0B02475g,CAGL0F00231g,CAGL0K11616g,	17.6	5.47	6.52	0.111887	1
GO:0015672	monovalent inorganic cation transport	0.01696	47	5	CAGL0H00506g,CAGL0H05489g,CAGL0I04686g,CAGL0L09713g,CAGL0M09581g,	10.6	3.3	3.65	0.117124	1
GO:0007005	mitochondrion organization	0.0171322	232	14	CAGL0A03542g,CAGL0A04169g,CAGL0B00396g,CAGL0B02860g,CAGL0D06424g,CAGL0E01287g,CAGL0G08195g,CAGL0I00418g,CAGL0I05918g,CAGL0I09262g,CAGL0J03608g,CAGL0J03850g,CAGL0J09790g,CAGL0K07436g,	6	1.87	2.01	0.117621	1
GO:0044238	primary metabolic process	0.0201391	2519	95	CAGL0A00363g,CAGL0A01023g,CAGL0A01045g,CAGL0A02112g,CAGL0A02574g,CAGL0A03366g,CAGL0B00902g,CAGL0B01122g,CAGL0B02431g,CAGL0B02794g,CAGL0B03663g,CAGL0B03839g,CAGL0C01243g,CAGL0C01325g,CAGL0C02211g,CAGL0C02321g,CAGL0C03443g,CAGL0D00528g,CAGL0D01034g,CAGL0D01562g,CAGL0D01716g,CAGL0D04356g,CAGL0D06402g,CAGL0D06424g,CAGL0D06556g,CAGL0E00737g,CAGL0E01287g,CAGL0E02453g,CAGL0E05016g,CAGL0F01749g,CAGL0F024…	3.8	1.17	1.39	0.137461	1
GO:0098662	inorganic cation transmembrane transport	0.0203382	67	6	CAGL0E01353g,CAGL0H00506g,CAGL0H05489g,CAGL0I04686g,CAGL0L09713g,CAGL0M09581g,	9	2.77	3.02	0.138018	1
GO:0044237	cellular metabolic process	0.0208467	2646	99	CAGL0A00363g,CAGL0A01023g,CAGL0A01045g,CAGL0A02112g,CAGL0A02574g,CAGL0A03366g,CAGL0B00902g,CAGL0B01122g,CAGL0B02431g,CAGL0B02475g,CAGL0B02794g,CAGL0B02860g,CAGL0B03663g,CAGL0B03839g,CAGL0B04917g,CAGL0C01243g,CAGL0C01325g,CAGL0C02321g,CAGL0C03443g,CAGL0D00528g,CAGL0D01034g,CAGL0D01562g,CAGL0D01716g,CAGL0D04356g,CAGL0D05280g,CAGL0D06402g,CAGL0D06424g,CAGL0D06556g,CAGL0E00737g,CAGL0E01287g,CAGL0E024…	3.7	1.16	1.39	0.140655	1
GO:0071554	cell wall organization or biogenesis	0.0216153	239	14	CAGL0C02211g,CAGL0D01034g,CAGL0E04620g,CAGL0F08833g,CAGL0G00286g,CAGL0G07271g,CAGL0G08668g,CAGL0G09449g,CAGL0H06413g,CAGL0I06182g,CAGL0J09922g,CAGL0L01551g,CAGL0L07502g,CAGL0M01826g,	5.9	1.81	1.94	0.145008	1
GO:1901137	carbohydrate derivative biosynthetic process	0.023211	218	13	CAGL0A03366g,CAGL0B02794g,CAGL0D01034g,CAGL0H00506g,CAGL0H05489g,CAGL0H07887g,CAGL0I04444g,CAGL0I04686g,CAGL0K04499g,CAGL0K10340g,CAGL0L09713g,CAGL0M09581g,CAGL0M13717g,	6	1.85	1.98	0.154828	1
GO:0071852	fungal-type cell wall organization or biogenesis	0.0248057	220	13	CAGL0D01034g,CAGL0E04620g,CAGL0F08833g,CAGL0G00286g,CAGL0G07271g,CAGL0G08668g,CAGL0G09449g,CAGL0H06413g,CAGL0I06182g,CAGL0J09922g,CAGL0L01551g,CAGL0L07502g,CAGL0M01826g,	5.9	1.83	1.96	0.16453	1
GO:0015711	organic anion transport	0.0251105	110	8	CAGL0E05632g,CAGL0F08085g,CAGL0G08195g,CAGL0I07689g,CAGL0K04367g,CAGL0K07436g,CAGL0K11616g,CAGL0L02079g,	7.3	2.25	2.42	0.164644	1
GO:0040030	regulation of molecular function, epigenetic	0.025524	8	2	CAGL0J08316g,CAGL0L06094g,	25	7.74	10.1	0.164644	1
GO:0044030	regulation of DNA methylation	0.025524	8	2	CAGL0J08316g,CAGL0L06094g,	25	7.74	10.1	0.164644	1
GO:0042891	antibiotic transport	0.025524	8	2	CAGL0K07436g,CAGL0L02079g,	25	7.74	10.1	0.164644	1
GO:0090342	regulation of cell aging	0.025524	8	2	CAGL0B02475g,CAGL0G07271g,	25	7.74	10.1	0.164644	1
GO:0008152	metabolic process	0.0258226	2852	105	CAGL0A00363g,CAGL0A01023g,CAGL0A01045g,CAGL0A02112g,CAGL0A02574g,CAGL0A03366g,CAGL0B00902g,CAGL0B01122g,CAGL0B02431g,CAGL0B02475g,CAGL0B02794g,CAGL0B02860g,CAGL0B03663g,CAGL0B03839g,CAGL0B04917g,CAGL0C01243g,CAGL0C01325g,CAGL0C02211g,CAGL0C02321g,CAGL0C03443g,CAGL0C04873g,CAGL0D00528g,CAGL0D01034g,CAGL0D01562g,CAGL0D01716g,CAGL0D04092g,CAGL0D04356g,CAGL0D05280g,CAGL0D06402g,CAGL0D06424g,CAGL0D065…	3.7	1.14	1.38	0.16566	1
GO:0046496	nicotinamide nucleotide metabolic process	0.0272056	53	5	CAGL0A01023g,CAGL0B02431g,CAGL0H05137g,CAGL0I00748g,CAGL0K01683g,	9.4	2.92	3.19	0.171526	1
GO:0019362	pyridine nucleotide metabolic process	0.0272056	53	5	CAGL0A01023g,CAGL0B02431g,CAGL0H05137g,CAGL0I00748g,CAGL0K01683g,	9.4	2.92	3.19	0.171526	1
GO:0006839	mitochondrial transport	0.0314343	74	6	CAGL0F08085g,CAGL0H00506g,CAGL0I05918g,CAGL0J03850g,CAGL0K07436g,CAGL0L02079g,	8.1	2.51	2.7	0.171526	1
GO:0006835	dicarboxylic acid transport	0.0321293	9	2	CAGL0K07436g,CAGL0K11616g,	22.2	6.88	8.65	0.171526	1
GO:1900264	positive regulation of DNA-directed DNA polymerase activity	0.0322824	1	1	CAGL0D01716g,	100	30.98	inf	0.171526	1
GO:0006120	mitochondrial electron transport, NADH to ubiquinone	0.0322824	1	1	CAGL0B02431g,	100	30.98	inf	0.171526	1
GO:0097080	plasma membrane selenite transport	0.0322824	1	1	CAGL0B02475g,	100	30.98	inf	0.171526	1
GO:0006542	glutamine biosynthetic process	0.0322824	1	1	CAGL0K05357g,	100	30.98	inf	0.171526	1
GO:0090343	positive regulation of cell aging	0.0322824	1	1	CAGL0B02475g,	100	30.98	inf	0.171526	1
GO:1904726	regulation of replicative senescence	0.0322824	1	1	CAGL0B02475g,	100	30.98	inf	0.171526	1
GO:1904728	positive regulation of replicative senescence	0.0322824	1	1	CAGL0B02475g,	100	30.98	inf	0.171526	1
GO:1900262	regulation of DNA-directed DNA polymerase activity	0.0322824	1	1	CAGL0D01716g,	100	30.98	inf	0.171526	1
GO:0001408	guanine nucleotide transport	0.0322824	1	1	CAGL0J09790g,	100	30.98	inf	0.171526	1
GO:0090549	response to carbon starvation	0.0322824	1	1	CAGL0C02321g,	100	30.98	inf	0.171526	1
GO:0010134	sulfate assimilation via adenylyl sulfate reduction	0.0322824	1	1	CAGL0B03839g,	100	30.98	inf	0.171526	1
GO:0046356	acetyl-CoA catabolic process	0.0322824	1	1	CAGL0H03993g,	100	30.98	inf	0.171526	1
GO:0034031	ribonucleoside bisphosphate catabolic process	0.0322824	1	1	CAGL0H03993g,	100	30.98	inf	0.171526	1
GO:0035435	phosphate ion transmembrane transport	0.0322824	1	1	CAGL0F00231g,	100	30.98	inf	0.171526	1
GO:0019858	cytosine metabolic process	0.0322824	1	1	CAGL0D01562g,	100	30.98	inf	0.171526	1
GO:0019265	glycine biosynthetic process, by transamination of glyoxylate	0.0322824	1	1	CAGL0K12518g,	100	30.98	inf	0.171526	1
GO:0033194	response to hydroperoxide	0.0322824	1	1	CAGL0G07271g,	100	30.98	inf	0.171526	1
GO:0009109	coenzyme catabolic process	0.0322824	1	1	CAGL0H03993g,	100	30.98	inf	0.171526	1
GO:0034034	purine nucleoside bisphosphate catabolic process	0.0322824	1	1	CAGL0H03993g,	100	30.98	inf	0.171526	1
GO:0033869	nucleoside bisphosphate catabolic process	0.0322824	1	1	CAGL0H03993g,	100	30.98	inf	0.171526	1
GO:0042883	cysteine transport	0.0322824	1	1	CAGL0K04367g,	100	30.98	inf	0.171526	1
GO:0042776	mitochondrial ATP synthesis coupled proton transport	0.0322824	1	1	CAGL0H00506g,	100	30.98	inf	0.171526	1
GO:0015856	cytosine transport	0.0322824	1	1	CAGL0J02948g,	100	30.98	inf	0.171526	1
GO:0015812	gamma-aminobutyric acid transport	0.0322824	1	1	CAGL0E05632g,	100	30.98	inf	0.171526	1
GO:0015742	alpha-ketoglutarate transport	0.0322824	1	1	CAGL0K07436g,	100	30.98	inf	0.171526	1
GO:0015729	oxaloacetate transport	0.0322824	1	1	CAGL0K11616g,	100	30.98	inf	0.171526	1
GO:0071268	homocysteine biosynthetic process	0.0322824	1	1	CAGL0D06402g,	100	30.98	inf	0.171526	1
GO:0015855	pyrimidine nucleobase transport	0.0322824	1	1	CAGL0J02948g,	100	30.98	inf	0.171526	1
GO:0010045	response to nickel cation	0.0322824	1	1	CAGL0C01243g,	100	30.98	inf	0.171526	1
GO:0034659	isopropylmalate transport	0.0322824	1	1	CAGL0K11616g,	100	30.98	inf	0.171526	1
GO:0071269	L-homocysteine biosynthetic process	0.0322824	1	1	CAGL0D06402g,	100	30.98	inf	0.171526	1
GO:0034394	protein localization to cell surface	0.0322824	1	1	CAGL0L01485g,	100	30.98	inf	0.171526	1
GO:0042262	DNA protection	0.0322824	1	1	CAGL0G07271g,	100	30.98	inf	0.171526	1
GO:0006633	fatty acid biosynthetic process	0.032435	22	3	CAGL0D00528g,CAGL0I00418g,CAGL0L10780g,	13.6	4.22	4.8	0.171526	1
GO:0015718	monocarboxylic acid transport	0.032435	22	3	CAGL0E05632g,CAGL0F08085g,CAGL0K11616g,	13.6	4.22	4.8	0.171526	1
GO:0022610	biological adhesion	0.0382384	58	5	CAGL0B00902g,CAGL0G08195g,CAGL0J09922g,CAGL0K01683g,CAGL0M01826g,	8.6	2.67	2.88	0.201309	1
GO:0015804	neutral amino acid transport	0.0393227	10	2	CAGL0E05632g,CAGL0K04367g,	20	6.2	7.57	0.204269	1
GO:0015851	nucleobase transport	0.0393227	10	2	CAGL0J02948g,CAGL0L06138g,	20	6.2	7.57	0.204269	1
GO:0006122	mitochondrial electron transport, ubiquinol to cytochrome c	0.0393227	10	2	CAGL0G10153g,CAGL0I03190g,	20	6.2	7.57	0.204269	1
GO:0007007	inner mitochondrial membrane organization	0.0406844	24	3	CAGL0B00396g,CAGL0G08195g,CAGL0I09262g,	12.5	3.87	4.34	0.209722	1
GO:0072524	pyridine-containing compound metabolic process	0.0407297	59	5	CAGL0A01023g,CAGL0B02431g,CAGL0H05137g,CAGL0I00748g,CAGL0K01683g,	8.5	2.63	2.83	0.209722	1
GO:1901606	alpha-amino acid catabolic process	0.0451683	25	3	CAGL0D04356g,CAGL0L00429g,CAGL0M12188g,	12	3.72	4.14	0.230555	1
GO:0034614	cellular response to reactive oxygen species	0.0451683	25	3	CAGL0E04356g,CAGL0G07271g,CAGL0I00418g,	12	3.72	4.14	0.230555	1

## Sheet: Group 3
Supplementary file 2: List of GO-terms enriched from temporally induced genes in wildtype C. glabrata in response to macrophage infection
	GO-Term enrichment employing Candida genome database
GOID	GO_term	Corrected P-value	Cluster frequency	Background frequency	False discovery rate	Gene(s) annotated to the term	Directly Annotated GOID List
45733	acetate catabolic process	4.55e-06	6 out of 173 genes, 3.5%	7 out of 5615 background genes, 0.1%	0	CAGL0B02717g:CAGL0B04543g:ICL1:CAGL0J11836g:CAGL0L03982g:CAGL0M09020g	6097:6631:55085:9062:15976:19427:9437:15879:45733:15741:15744
6334	nucleosome assembly	0.0001	9 out of 173 genes, 5.2%	29 out of 5615 background genes, 0.5%	0	HHT2:CAGL0C04136g:CAGL0C04389g:CAGL0C04411g:CAGL0E02315g:CAGL0H09834g:CAGL0K11440g:CAGL0K11462g:CAGL0M06655g	6974:43935:31454:6352:1903098:6281:6333:6338:71931:6325:9303:34501:6301:43486:6334:70481:7076:34729:30466:61587:122:34728:45739:6357:70911
9060	aerobic respiration	0.00113	11 out of 173 genes, 6.4%	59 out of 5615 background genes, 1.1%	0	CAGL0C03223g:CAGL0D00748g:CAGL0D01958g:CAGL0E01705g:CAGL0F04213g:CAGL0I06270g:IDH2:COX6:CAGL0K02893g:MDH1:CAGL0L06204g	9060:5975:6099:140021:97250:55085:9061:6102:6123:55114:16558:6094:15867:6915:15866:15886:6122:45333:1990544:45039:1302:6108:6839
6091	generation of precursor metabolites and energy	0.00569	15 out of 173 genes, 8.7%	127 out of 5615 background genes, 2.3%	0.0014	CAGL0C03223g:CAGL0D00748g:CAGL0D01958g:CAGL0E01705g:CAGL0F04213g:CAGL0F05863g:CAGL0G01881g:HXK2:CAGL0I06270g:IDH2:COX6:CAGL0J03080g:CAGL0K02893g:MDH1:CAGL0L06204g	6096:9060:6006:5975:6099:140021:6013:97250:55085:9061:2001234:6102:6123:55114:16558:6094:6979:15867:6915:15866:15886:6122:45333:46323:1990544:6112:6000:45039:1302:46015:32445:1678:1901858:6108:6839
34728	nucleosome organization	0.05373	11 out of 173 genes, 6.4%	87 out of 5615 background genes, 1.5%	0.0009	CAGL0C00495g:HHT2:CAGL0C04136g:CAGL0C04389g:CAGL0C04411g:CAGL0E02315g:CAGL0H09834g:CAGL0K11440g:CAGL0K11462g:ACT1:CAGL0M06655g	6974:43935:7346:31454:6352:45944:1903098:7049:6281:9306:6333:6338:71931:6325:11:30476:9303:34501:30010:6301:43486:6334:1903475:70481:7076:34729:30466:61587:34599:1902404:10389:16573:122:60303:6897:43044:34728:45739:6357:70911
19319	hexose biosynthetic process	0.0825	4 out of 173 genes, 2.3%	9 out of 5615 background genes, 0.2%	0.0008	CAGL0E01705g:CAGL0H04939g:CAGL0H06633g:SEC53	6099:55114:16558:6094:45047:8152:15976:9298:19307:6108:72593
15976	carbon utilization	6.12e-06	8 out of 173 genes, 4.6%	16 out of 5615 background genes, 0.3%	0	CAGL0B02717g:CAGL0B04543g:CAGL0F07007g:CAGL0H06633g:ICL1:CAGL0J11836g:CAGL0L03982g:CAGL0M09020g	6097:6631:55085:9062:15976:19427:9437:6094:15879:45733:15741:1904183:1901524:18105:15744
6083	acetate metabolic process	5.67e-05	7 out of 173 genes, 4.0%	14 out of 5615 background genes, 0.2%	0	CAGL0B02717g:CAGL0B04543g:ICL1:CAGL0J04268g:CAGL0J11836g:CAGL0L03982g:CAGL0M09020g	6097:6084:6631:19679:55085:6083:9062:15976:19427:9437:15879:45733:15741:15744
44281	small molecule metabolic process	5.8e-05	41 out of 173 genes, 23.7%	559 out of 5615 background genes, 10.0%	0	CAGL0A01111g:CAGL0A03036g:PDI1:CAGL0B02717g:ILV5:CAGL0B03465g:CAGL0B04543g:ATP16:ARG1:CAGL0D01892g:ACP1:CAGL0E01705g:CAGL0E06138g:CAGL0E06424g:CAGL0F04279g:SUR4:CAGL0G09064g:CAGL0H01397g:CAGL0H03905g:CAGL0H04939g:CAGL0H06633g:CAGL0H06699g:HXK2:CAGL0I00572g:MET6:IDH2:CAGL0I08305g:ICL1:CAGL0J03146g:CAGL0J04268g:CAGL0J11836g:CAGL0K01837g:CAGL0K03201g:CAGL0K04125g:SEC53:CAGL0L03982g:MDH1:CAGL0L09581g…	6096:1900535:6226:61508:6974:9060:6006:5975:6235:9437:9117:15744:6099:9231:6084:6013:30497:6631:19679:55085:15986:45454:2001234:6102:6116:15741:19280:6067:55114:16558:9062:6094:6241:6260:1904382:45733:9107:45047:8152:46081:6066:6165:6892:6114:6072:6083:15976:6771:9082:16226:51211:46080:30437:42407:6526:6457:30148:46323:6662:2:6240:15879:6071:6000:6696:46084:46939:42759:6183:6729:9298:6228:34599:6…
45333	cellular respiration	0.0001	13 out of 173 genes, 7.5%	69 out of 5615 background genes, 1.2%	0	CAGL0C03223g:CAGL0D00748g:CAGL0D01958g:CAGL0E01705g:CAGL0F04213g:CAGL0F05863g:CAGL0G01881g:CAGL0I06270g:IDH2:COX6:CAGL0K02893g:MDH1:CAGL0L06204g	9060:5975:6099:140021:97250:55085:9061:6102:6123:55114:16558:6094:6979:15867:6915:15866:15886:6122:45333:1990544:45039:1302:1901858:6108:6839
6631	fatty acid metabolic process	0.00065	11 out of 173 genes, 6.4%	56 out of 5615 background genes, 1.0%	0	CAGL0B04543g:ACP1:CAGL0E06138g:SUR4:ICL1:CAGL0J04268g:CAGL0J11836g:CAGL0K01837g:CAGL0K04125g:CAGL0L03982g:CAGL0M09020g	1900535:9437:15744:6084:30497:6631:19679:55085:15741:9062:9107:45733:6892:6083:15976:16226:30148:15879:42759:6097:42761:32511:38:9059:6633
15980	energy derivation by oxidation of organic compounds	0.0007	14 out of 173 genes, 8.1%	94 out of 5615 background genes, 1.7%	0	CAGL0C03223g:CAGL0D00748g:CAGL0D01958g:CAGL0E01705g:CAGL0F04213g:CAGL0F05863g:CAGL0G01881g:CAGL0I06270g:IDH2:COX6:CAGL0J03080g:CAGL0K02893g:MDH1:CAGL0L06204g	9060:5975:6099:140021:97250:55085:9061:6102:6123:55114:16558:6094:6979:15867:6915:15866:15886:6122:45333:1990544:6112:45039:1302:1901858:6108:6839
17144	drug metabolic process	0.00073	17 out of 173 genes, 9.8%	138 out of 5615 background genes, 2.5%	0	CAGL0A01111g:CAGL0A03036g:CAGL0B02717g:CAGL0B03465g:CAGL0B04543g:ATP16:CAGL0F04279g:CAGL0H01397g:CAGL0I00572g:MET6:ICL1:CAGL0J04268g:CAGL0J11836g:CAGL0K03201g:CAGL0L03982g:BMH1(B):CAGL0M09020g	9437:6270:15744:9231:6084:6631:19679:55085:51457:15986:1402:15741:19280:6067:44878:9062:45733:43066:77:34221:6083:15976:6771:30437:42407:7095:15879:31031:7265:46084:6729:7124:6097:70873:9086:6267:33615:10515:1904667:34613:19427:33314
9141	nucleoside triphosphate metabolic process	0.00144	8 out of 173 genes, 4.6%	29 out of 5615 background genes, 0.5%	0	CAGL0A01111g:CAGL0A03036g:ATP16:CAGL0H01397g:CAGL0I00572g:CAGL0J03146g:CAGL0L09581g:CAGL0M13277g	6226:61508:6974:6235:15986:55114:6241:6260:46081:6165:51211:46080:42407:6240:6183:6228:46704:9263:33615:9142
17001	antibiotic catabolic process	0.00412	6 out of 173 genes, 3.5%	16 out of 5615 background genes, 0.3%	0.0017	CAGL0B02717g:CAGL0B04543g:ICL1:CAGL0J11836g:CAGL0L03982g:CAGL0M09020g	9437:15744:6631:55085:15741:9062:45733:15976:15879:6097:19427
16999	antibiotic metabolic process	0.00421	8 out of 173 genes, 4.6%	33 out of 5615 background genes, 0.6%	0.0015	CAGL0B02717g:CAGL0B03465g:CAGL0B04543g:ICL1:CAGL0J04268g:CAGL0J11836g:CAGL0L03982g:CAGL0M09020g	9437:15744:6084:6631:19679:55085:15741:6067:9062:45733:6083:15976:15879:6097:19427
9142	nucleoside triphosphate biosynthetic process	0.00794	7 out of 173 genes, 4.0%	26 out of 5615 background genes, 0.5%	0.0013	CAGL0A01111g:CAGL0A03036g:ATP16:CAGL0H01397g:CAGL0I00572g:CAGL0J03146g:CAGL0M13277g	61508:6974:6235:15986:55114:6241:6260:6165:51211:42407:6240:6183:6228:46704:9263:33615:9142
46034	ATP metabolic process	0.02389	10 out of 173 genes, 5.8%	66 out of 5615 background genes, 1.2%	0.0012	CAGL0A01111g:CAGL0A03036g:ATP16:CAGL0D00748g:CAGL0H01397g:HXK2:CAGL0I00572g:CAGL0I06270g:COX6:CAGL0K02893g	6096:9060:6006:6013:15986:2001234:6123:42407:6122:46323:6000:1302:46015:32445:33615:1678
9145	purine nucleoside triphosphate biosynthetic process	0.03295	6 out of 173 genes, 3.5%	22 out of 5615 background genes, 0.4%	0.0012	CAGL0A01111g:CAGL0A03036g:ATP16:CAGL0H01397g:CAGL0I00572g:CAGL0M13277g	61508:6974:15986:6241:6165:51211:42407:6183:6228:33615:9142
9205	purine ribonucleoside triphosphate metabolic process	0.03295	6 out of 173 genes, 3.5%	22 out of 5615 background genes, 0.4%	0.0011	CAGL0A01111g:CAGL0A03036g:ATP16:CAGL0H01397g:CAGL0I00572g:CAGL0M13277g	61508:6974:15986:6241:6165:51211:42407:6183:6228:33615:9142
9206	purine ribonucleoside triphosphate biosynthetic process	0.03295	6 out of 173 genes, 3.5%	22 out of 5615 background genes, 0.4%	0.0011	CAGL0A01111g:CAGL0A03036g:ATP16:CAGL0H01397g:CAGL0I00572g:CAGL0M13277g	61508:6974:15986:6241:6165:51211:42407:6183:6228:33615:9142
9144	purine nucleoside triphosphate metabolic process	0.04345	6 out of 173 genes, 3.5%	23 out of 5615 background genes, 0.4%	0.001	CAGL0A01111g:CAGL0A03036g:ATP16:CAGL0H01397g:CAGL0I00572g:CAGL0M13277g	61508:6974:15986:6241:6165:51211:42407:6183:6228:33615:9142
9199	ribonucleoside triphosphate metabolic process	0.04345	6 out of 173 genes, 3.5%	23 out of 5615 background genes, 0.4%	0.001	CAGL0A01111g:CAGL0A03036g:ATP16:CAGL0H01397g:CAGL0I00572g:CAGL0M13277g	61508:6974:15986:6241:6165:51211:42407:6183:6228:33615:9142
9201	ribonucleoside triphosphate biosynthetic process	0.04345	6 out of 173 genes, 3.5%	23 out of 5615 background genes, 0.4%	0.0009	CAGL0A01111g:CAGL0A03036g:ATP16:CAGL0H01397g:CAGL0I00572g:CAGL0M13277g	61508:6974:15986:6241:6165:51211:42407:6183:6228:33615:9142
32787	monocarboxylic acid metabolic process	0.05522	13 out of 173 genes, 7.5%	119 out of 5615 background genes, 2.1%	0.0008	CAGL0B02717g:CAGL0B04543g:ACP1:CAGL0E06138g:SUR4:HXK2:ICL1:CAGL0J04268g:CAGL0J11836g:CAGL0K01837g:CAGL0K04125g:CAGL0L03982g:CAGL0M09020g	6096:1900535:6006:9437:15744:6084:6013:30497:6631:19679:55085:2001234:15741:9062:9107:45733:6892:6083:15976:16226:30148:46323:15879:6000:42759:6097:1302:42761:46015:32445:32511:1678:19427:38:9059:6633
46364	monosaccharide biosynthetic process	0.0825	4 out of 173 genes, 2.3%	9 out of 5615 background genes, 0.2%	0.0008	CAGL0E01705g:CAGL0H04939g:CAGL0H06633g:SEC53	6099:55114:16558:6094:45047:8152:15976:9298:19307:6108:72593
	GO-Term enrichment employing FungiDB database
ID	Name	P-value	Bgd count	Result count	Result gene list	Pct of bgd	Fold enrichment	Odds ratio	Benjamini	Bonferroni
GO:0031497	chromatin assembly	2.71289e-05	50	9	CAGL0C04114g,CAGL0C04136g,CAGL0C04389g,CAGL0C04411g,CAGL0E02315g,CAGL0H09834g,CAGL0K11440g,CAGL0K11462g,CAGL0M06655g,	18	5.51	6.8	0.00190215	0.0494559
GO:0006099	tricarboxylic acid cycle	0.000281027	19	5	CAGL0C03223g,CAGL0D01958g,CAGL0E01705g,CAGL0I07227g,CAGL0L05236g,	26.3	8.06	10.86	0.0122271	0.512312
GO:0006323	DNA packaging	0.000321863	68	9	CAGL0C04114g,CAGL0C04136g,CAGL0C04389g,CAGL0C04411g,CAGL0E02315g,CAGL0H09834g,CAGL0K11440g,CAGL0K11462g,CAGL0M06655g,	13.2	4.05	4.71	0.0124842	0.586756
GO:0006097	glyoxylate cycle	0.00311362	3	2	CAGL0J03058g,CAGL0L03982g,	66.7	20.41	59.92	0.066778	1
GO:0006289	nucleotide-excision repair	0.00437224	48	6	CAGL0A03117g,CAGL0C00341g,CAGL0C04114g,CAGL0H03509g,CAGL0K08910g,CAGL0M06655g,	12.5	3.83	4.35	0.0857052	1
GO:0009405	pathogenesis	0.0101102	172	12	CAGL0B04565g,CAGL0C05335g,CAGL0D01936g,CAGL0E03113g,CAGL0G00220g,CAGL0G09020g,CAGL0H03971g,CAGL0J03058g,CAGL0K11594g,CAGL0L06270g,CAGL0M07315g,CAGL0M13805g,	7	2.14	2.31	0.138578	1
GO:0022610	biological adhesion	0.0110329	58	6	CAGL0B04565g,CAGL0G00220g,CAGL0G09020g,CAGL0L06534g,CAGL0M04191g,CAGL0M13805g,	10.3	3.17	3.5	0.150097	1
GO:0052031	modulation by symbiont of host defense response	0.0166153	17	3	CAGL0I04994g,CAGL0M04191g,CAGL0M13805g,	17.6	5.4	6.44	0.191707	1
GO:0000082	G1/S transition of mitotic cell cycle	0.017753	47	5	CAGL0E01567g,CAGL0E02315g,CAGL0G07249g,CAGL0I03938g,CAGL0L12474g,	10.6	3.26	3.6	0.197573	1
GO:0046394	carboxylic acid biosynthetic process	0.0489025	169	10	CAGL0B03047g,CAGL0C05115g,CAGL0D01892g,CAGL0D03586g,CAGL0E06138g,CAGL0G04851g,CAGL0H03905g,CAGL0H07579g,CAGL0I04994g,CAGL0K04125g,	5.9	1.81	1.92	0.325362	1
GO:0017144	drug metabolic process	8.94443e-11	195	27	CAGL0A01111g,CAGL0A03036g,CAGL0B02717g,CAGL0B03465g,CAGL0B04543g,CAGL0C03223g,CAGL0C04455g,CAGL0D00748g,CAGL0D01958g,CAGL0E01705g,CAGL0F04279g,CAGL0H01397g,CAGL0H07579g,CAGL0I00572g,CAGL0I04994g,CAGL0I06270g,CAGL0I07227g,CAGL0J00429g,CAGL0J03058g,CAGL0J04268g,CAGL0J11836g,CAGL0K02893g,CAGL0K03201g,CAGL0L03982g,CAGL0L05236g,CAGL0L06270g,CAGL0M09020g,	13.8	4.24	5.46	1.63057e-07	1.63057e-07
GO:0044281	small molecule metabolic process	1.12019e-09	598	48	CAGL0A01111g,CAGL0A03036g,CAGL0B00704g,CAGL0B02717g,CAGL0B03047g,CAGL0B03465g,CAGL0B04543g,CAGL0C03223g,CAGL0C04455g,CAGL0C05115g,CAGL0C05335g,CAGL0D00748g,CAGL0D01892g,CAGL0D01958g,CAGL0D03586g,CAGL0E01705g,CAGL0E06138g,CAGL0E06424g,CAGL0F04279g,CAGL0G04851g,CAGL0G09064g,CAGL0H01397g,CAGL0H03905g,CAGL0H04939g,CAGL0H06633g,CAGL0H06699g,CAGL0H07579g,CAGL0I00572g,CAGL0I04994g,CAGL0I06270g,CAGL0I072…	8	2.46	3.19	1.02105e-06	2.0421e-06
GO:0045733	acetate catabolic process	7.59369e-09	7	6	CAGL0B02717g,CAGL0B04543g,CAGL0J03058g,CAGL0J11836g,CAGL0L03982g,CAGL0M09020g,	85.7	26.24	184.06	4.61443e-06	1.38433e-05
GO:0016999	antibiotic metabolic process	1.05798e-08	54	13	CAGL0B02717g,CAGL0B03465g,CAGL0B04543g,CAGL0C03223g,CAGL0D01958g,CAGL0E01705g,CAGL0I07227g,CAGL0J03058g,CAGL0J04268g,CAGL0J11836g,CAGL0L03982g,CAGL0L05236g,CAGL0M09020g,	24.1	7.37	10.07	4.82177e-06	1.92871e-05
GO:0015976	carbon utilization	2.08472e-08	17	8	CAGL0B02717g,CAGL0B04543g,CAGL0F07007g,CAGL0H06633g,CAGL0J03058g,CAGL0J11836g,CAGL0L03982g,CAGL0M09020g,	47.1	14.41	27.56	7.60088e-06	3.80044e-05
GO:0006334	nucleosome assembly	1.96006e-07	29	9	CAGL0C04114g,CAGL0C04136g,CAGL0C04389g,CAGL0C04411g,CAGL0E02315g,CAGL0H09834g,CAGL0K11440g,CAGL0K11462g,CAGL0M06655g,	31	9.5	14	5.95533e-05	0.00035732
GO:0009141	nucleoside triphosphate metabolic process	4.7891e-07	73	13	CAGL0A01111g,CAGL0A03036g,CAGL0C04455g,CAGL0D00748g,CAGL0H01397g,CAGL0H07579g,CAGL0I00572g,CAGL0I06270g,CAGL0J00429g,CAGL0J03146g,CAGL0K02893g,CAGL0L09581g,CAGL0M13277g,	17.8	5.45	6.86	0.000124722	0.000873052
GO:0045333	cellular respiration	5.64628e-07	74	13	CAGL0C03223g,CAGL0D00748g,CAGL0D01958g,CAGL0E01705g,CAGL0F04213g,CAGL0F05863g,CAGL0I06270g,CAGL0I07227g,CAGL0J00429g,CAGL0J11836g,CAGL0K02893g,CAGL0L05236g,CAGL0L06204g,	17.6	5.38	6.74	0.000128665	0.00102932
GO:0015980	energy derivation by oxidation of organic compounds	8.18489e-07	102	15	CAGL0C03223g,CAGL0D00748g,CAGL0D01958g,CAGL0E01705g,CAGL0F04213g,CAGL0F05863g,CAGL0I06270g,CAGL0I07227g,CAGL0J00429g,CAGL0J03080g,CAGL0J11836g,CAGL0K02893g,CAGL0L05236g,CAGL0L06204g,CAGL0L06270g,	14.7	4.5	5.5	0.000165789	0.0014921
GO:0006083	acetate metabolic process	1.57947e-06	13	6	CAGL0B02717g,CAGL0B04543g,CAGL0J03058g,CAGL0J11836g,CAGL0L03982g,CAGL0M09020g,	46.2	14.13	26.26	0.000271913	0.00287937
GO:0006631	fatty acid metabolic process	1.64073e-06	57	11	CAGL0B04543g,CAGL0D03586g,CAGL0E06138g,CAGL0G04851g,CAGL0J03058g,CAGL0J04268g,CAGL0J11836g,CAGL0K01837g,CAGL0K04125g,CAGL0L03982g,CAGL0M09020g,	19.3	5.91	7.5	0.000271913	0.00299104
GO:0006091	generation of precursor metabolites and energy	1.88436e-06	123	16	CAGL0C03223g,CAGL0D00748g,CAGL0D01958g,CAGL0E01705g,CAGL0F04213g,CAGL0F05863g,CAGL0H07579g,CAGL0I06270g,CAGL0I07227g,CAGL0J00429g,CAGL0J03080g,CAGL0J11836g,CAGL0K02893g,CAGL0L05236g,CAGL0L06204g,CAGL0L06270g,	13	3.98	4.78	0.000286266	0.0034352
GO:0009259	ribonucleotide metabolic process	3.10197e-06	113	15	CAGL0A01111g,CAGL0A03036g,CAGL0B02717g,CAGL0C04455g,CAGL0D00748g,CAGL0H01397g,CAGL0H07579g,CAGL0I00572g,CAGL0I06270g,CAGL0J00429g,CAGL0J03146g,CAGL0J04268g,CAGL0J11836g,CAGL0K02893g,CAGL0M13277g,	13.3	4.06	4.87	0.000434992	0.00565489
GO:0009060	aerobic respiration	5.41937e-06	64	11	CAGL0C03223g,CAGL0D00748g,CAGL0D01958g,CAGL0E01705g,CAGL0F04213g,CAGL0I06270g,CAGL0I07227g,CAGL0J00429g,CAGL0K02893g,CAGL0L05236g,CAGL0L06204g,	17.2	5.26	6.5	0.000662694	0.00987952
GO:0009117	nucleotide metabolic process	5.56058e-06	165	18	CAGL0A01111g,CAGL0A03036g,CAGL0B02717g,CAGL0C04455g,CAGL0D00748g,CAGL0H01397g,CAGL0H06699g,CAGL0H07579g,CAGL0I00572g,CAGL0I06270g,CAGL0J00429g,CAGL0J03146g,CAGL0J04268g,CAGL0J11836g,CAGL0K02893g,CAGL0L09581g,CAGL0L11902g,CAGL0M13277g,	10.9	3.34	3.93	0.000662694	0.0101369
GO:0055086	nucleobase-containing small molecule metabolic process	5.8163e-06	199	20	CAGL0A01111g,CAGL0A03036g,CAGL0B02717g,CAGL0C04455g,CAGL0D00748g,CAGL0H01397g,CAGL0H06699g,CAGL0H07579g,CAGL0I00572g,CAGL0I04994g,CAGL0I06270g,CAGL0J00429g,CAGL0J03146g,CAGL0J04268g,CAGL0J11836g,CAGL0K02893g,CAGL0K12848g,CAGL0L09581g,CAGL0L11902g,CAGL0M13277g,	10.1	3.08	3.61	0.000662694	0.0106031
GO:0009205	purine ribonucleoside triphosphate metabolic process	7.39557e-06	66	11	CAGL0A01111g,CAGL0A03036g,CAGL0C04455g,CAGL0D00748g,CAGL0H01397g,CAGL0H07579g,CAGL0I00572g,CAGL0I06270g,CAGL0J00429g,CAGL0K02893g,CAGL0M13277g,	16.7	5.1	6.26	0.000737657	0.0134821
GO:0009150	purine ribonucleotide metabolic process	7.9725e-06	107	14	CAGL0A01111g,CAGL0A03036g,CAGL0B02717g,CAGL0C04455g,CAGL0D00748g,CAGL0H01397g,CAGL0H07579g,CAGL0I00572g,CAGL0I06270g,CAGL0J00429g,CAGL0J04268g,CAGL0J11836g,CAGL0K02893g,CAGL0M13277g,	13.1	4.01	4.76	0.000737657	0.0145339
GO:0072521	purine-containing compound metabolic process	8.15988e-06	122	15	CAGL0A01111g,CAGL0A03036g,CAGL0B02717g,CAGL0C04455g,CAGL0D00748g,CAGL0H01397g,CAGL0H07579g,CAGL0I00572g,CAGL0I04994g,CAGL0I06270g,CAGL0J00429g,CAGL0J04268g,CAGL0J11836g,CAGL0K02893g,CAGL0M13277g,	12.3	3.76	4.45	0.000737657	0.0148755
GO:0009144	purine nucleoside triphosphate metabolic process	8.60044e-06	67	11	CAGL0A01111g,CAGL0A03036g,CAGL0C04455g,CAGL0D00748g,CAGL0H01397g,CAGL0H07579g,CAGL0I00572g,CAGL0I06270g,CAGL0J00429g,CAGL0K02893g,CAGL0M13277g,	16.4	5.03	6.15	0.000737657	0.0156786
GO:0009199	ribonucleoside triphosphate metabolic process	8.60044e-06	67	11	CAGL0A01111g,CAGL0A03036g,CAGL0C04455g,CAGL0D00748g,CAGL0H01397g,CAGL0H07579g,CAGL0I00572g,CAGL0I06270g,CAGL0J00429g,CAGL0K02893g,CAGL0M13277g,	16.4	5.03	6.15	0.000737657	0.0156786
GO:0006163	purine nucleotide metabolic process	8.90206e-06	108	14	CAGL0A01111g,CAGL0A03036g,CAGL0B02717g,CAGL0C04455g,CAGL0D00748g,CAGL0H01397g,CAGL0H07579g,CAGL0I00572g,CAGL0I06270g,CAGL0J00429g,CAGL0J04268g,CAGL0J11836g,CAGL0K02893g,CAGL0M13277g,	13	3.97	4.71	0.000737657	0.0162285
GO:0006753	nucleoside phosphate metabolic process	1.00174e-05	172	18	CAGL0A01111g,CAGL0A03036g,CAGL0B02717g,CAGL0C04455g,CAGL0D00748g,CAGL0H01397g,CAGL0H06699g,CAGL0H07579g,CAGL0I00572g,CAGL0I06270g,CAGL0J00429g,CAGL0J03146g,CAGL0J04268g,CAGL0J11836g,CAGL0K02893g,CAGL0L09581g,CAGL0L11902g,CAGL0M13277g,	10.5	3.2	3.75	0.000775675	0.0182618
GO:0017001	antibiotic catabolic process	1.02119e-05	17	6	CAGL0B02717g,CAGL0B04543g,CAGL0J03058g,CAGL0J11836g,CAGL0L03982g,CAGL0M09020g,	35.3	10.81	16.7	0.000775675	0.0186162
GO:0019693	ribose phosphate metabolic process	1.34054e-05	127	15	CAGL0A01111g,CAGL0A03036g,CAGL0B02717g,CAGL0C04455g,CAGL0D00748g,CAGL0H01397g,CAGL0H07579g,CAGL0I00572g,CAGL0I06270g,CAGL0J00429g,CAGL0J03146g,CAGL0J04268g,CAGL0J11836g,CAGL0K02893g,CAGL0M13277g,	11.8	3.62	4.25	0.000977519	0.024438
GO:0005975	carbohydrate metabolic process	3.93248e-05	190	18	CAGL0C05335g,CAGL0E01705g,CAGL0G00220g,CAGL0G09020g,CAGL0G09064g,CAGL0H04939g,CAGL0H06633g,CAGL0H06699g,CAGL0H07579g,CAGL0I08459g,CAGL0J03058g,CAGL0K12848g,CAGL0L01727g,CAGL0L03982g,CAGL0L05236g,CAGL0L06270g,CAGL0L06534g,CAGL0M13805g,	9.5	2.9	3.34	0.00261755	0.0716892
GO:0046034	ATP metabolic process	4.02038e-05	65	10	CAGL0A01111g,CAGL0A03036g,CAGL0C04455g,CAGL0D00748g,CAGL0H01397g,CAGL0H07579g,CAGL0I00572g,CAGL0I06270g,CAGL0J00429g,CAGL0K02893g,	15.4	4.71	5.65	0.00261755	0.0732915
GO:0009142	nucleoside triphosphate biosynthetic process	7.1383e-05	44	8	CAGL0A01111g,CAGL0A03036g,CAGL0C04455g,CAGL0H01397g,CAGL0H07579g,CAGL0I00572g,CAGL0J03146g,CAGL0M13277g,	18.2	5.57	6.85	0.00448728	0.130131
GO:0034728	nucleosome organization	8.56674e-05	85	11	CAGL0C00495g,CAGL0C04114g,CAGL0C04136g,CAGL0C04389g,CAGL0C04411g,CAGL0E02315g,CAGL0H09834g,CAGL0K11440g,CAGL0K11462g,CAGL0K12694g,CAGL0M06655g,	12.9	3.96	4.63	0.00520572	0.156172
GO:0046364	monosaccharide biosynthetic process	0.00012181	9	4	CAGL0E01705g,CAGL0H04939g,CAGL0H06633g,CAGL0K12848g,	44.4	13.61	24.23	0.00693936	0.222059
GO:0019319	hexose biosynthetic process	0.00012181	9	4	CAGL0E01705g,CAGL0H04939g,CAGL0H06633g,CAGL0K12848g,	44.4	13.61	24.23	0.00693936	0.222059
GO:0032787	monocarboxylic acid metabolic process	0.000150755	122	13	CAGL0B02717g,CAGL0B04543g,CAGL0D03586g,CAGL0E06138g,CAGL0G04851g,CAGL0H07579g,CAGL0J03058g,CAGL0J04268g,CAGL0J11836g,CAGL0K01837g,CAGL0K04125g,CAGL0L03982g,CAGL0M09020g,	10.7	3.26	3.74	0.00832808	0.274827
GO:1901135	carbohydrate derivative metabolic process	0.00016612	311	23	CAGL0A01111g,CAGL0A03036g,CAGL0B00704g,CAGL0B02717g,CAGL0B04565g,CAGL0C04455g,CAGL0D00748g,CAGL0G09955g,CAGL0H01397g,CAGL0H06699g,CAGL0H07579g,CAGL0I00572g,CAGL0I06270g,CAGL0J00429g,CAGL0J03146g,CAGL0J04268g,CAGL0J11836g,CAGL0K02893g,CAGL0K12848g,CAGL0L06270g,CAGL0L09581g,CAGL0M07315g,CAGL0M13277g,	7.4	2.26	2.57	0.00890695	0.302836
GO:0065004	protein-DNA complex assembly	0.000259269	96	11	CAGL0C04114g,CAGL0C04136g,CAGL0C04389g,CAGL0C04411g,CAGL0E02315g,CAGL0H09834g,CAGL0I03432g,CAGL0K11440g,CAGL0K11462g,CAGL0L06270g,CAGL0M06655g,	11.5	3.51	4.03	0.0122271	0.472647
GO:0071852	fungal-type cell wall organization or biogenesis	0.00026232	220	18	CAGL0A04081g,CAGL0B04565g,CAGL0D01936g,CAGL0F07579g,CAGL0F07601g,CAGL0G00220g,CAGL0G04851g,CAGL0G09020g,CAGL0G09955g,CAGL0I06160g,CAGL0I08459g,CAGL0K09130g,CAGL0K12694g,CAGL0L01727g,CAGL0L06270g,CAGL0L06534g,CAGL0M04191g,CAGL0M08514g,	8.2	2.51	2.83	0.0122271	0.478209
GO:0009206	purine ribonucleoside triphosphate biosynthetic process	0.000262997	40	7	CAGL0A01111g,CAGL0A03036g,CAGL0C04455g,CAGL0H01397g,CAGL0H07579g,CAGL0I00572g,CAGL0M13277g,	17.5	5.36	6.51	0.0122271	0.479443
GO:0009145	purine nucleoside triphosphate biosynthetic process	0.000262997	40	7	CAGL0A01111g,CAGL0A03036g,CAGL0C04455g,CAGL0H01397g,CAGL0H07579g,CAGL0I00572g,CAGL0M13277g,	17.5	5.36	6.51	0.0122271	0.479443
GO:0015986	ATP synthesis coupled proton transport	0.000281027	19	5	CAGL0A01111g,CAGL0A03036g,CAGL0C04455g,CAGL0H01397g,CAGL0I00572g,	26.3	8.06	10.86	0.0122271	0.512312
GO:0015985	energy coupled proton transport, down electrochemical gradient	0.000281027	19	5	CAGL0A01111g,CAGL0A03036g,CAGL0C04455g,CAGL0H01397g,CAGL0I00572g,	26.3	8.06	10.86	0.0122271	0.512312
GO:0055114	oxidation-reduction process	0.000282614	281	21	CAGL0A04433g,CAGL0B03047g,CAGL0C03223g,CAGL0C04697g,CAGL0D00748g,CAGL0D01958g,CAGL0E01705g,CAGL0E06424g,CAGL0F04213g,CAGL0F05863g,CAGL0H06699g,CAGL0I06270g,CAGL0I07227g,CAGL0J00429g,CAGL0J03080g,CAGL0J03146g,CAGL0J11836g,CAGL0K02893g,CAGL0L05236g,CAGL0L06204g,CAGL0L06270g,	7.5	2.29	2.58	0.0122271	0.515205
GO:0010847	regulation of chromatin assembly	0.000303019	11	4	CAGL0C04114g,CAGL0E02315g,CAGL0K08910g,CAGL0M06655g,	36.4	11.13	17.3	0.0122271	0.552404
GO:0001672	regulation of chromatin assembly or disassembly	0.000303019	11	4	CAGL0C04114g,CAGL0E02315g,CAGL0K08910g,CAGL0M06655g,	36.4	11.13	17.3	0.0122271	0.552404
GO:0019752	carboxylic acid metabolic process	0.000304238	324	23	CAGL0B02717g,CAGL0B03047g,CAGL0B04543g,CAGL0C03223g,CAGL0C05115g,CAGL0D01892g,CAGL0D01958g,CAGL0D03586g,CAGL0E01705g,CAGL0E06138g,CAGL0G04851g,CAGL0H03905g,CAGL0H07579g,CAGL0I04994g,CAGL0I07227g,CAGL0J03058g,CAGL0J04268g,CAGL0J11836g,CAGL0K01837g,CAGL0K04125g,CAGL0L03982g,CAGL0L05236g,CAGL0M09020g,	7.1	2.17	2.46	0.0122271	0.554627
GO:0009201	ribonucleoside triphosphate biosynthetic process	0.000308528	41	7	CAGL0A01111g,CAGL0A03036g,CAGL0C04455g,CAGL0H01397g,CAGL0H07579g,CAGL0I00572g,CAGL0M13277g,	17.1	5.23	6.31	0.0122271	0.562447
GO:0009126	purine nucleoside monophosphate metabolic process	0.000362677	84	10	CAGL0A01111g,CAGL0A03036g,CAGL0C04455g,CAGL0D00748g,CAGL0H01397g,CAGL0H07579g,CAGL0I00572g,CAGL0I06270g,CAGL0J00429g,CAGL0K02893g,	11.9	3.65	4.19	0.0133035	0.66116
GO:0009167	purine ribonucleoside monophosphate metabolic process	0.000362677	84	10	CAGL0A01111g,CAGL0A03036g,CAGL0C04455g,CAGL0D00748g,CAGL0H01397g,CAGL0H07579g,CAGL0I00572g,CAGL0I06270g,CAGL0J00429g,CAGL0K02893g,	11.9	3.65	4.19	0.0133035	0.66116
GO:0006101	citrate metabolic process	0.000364879	20	5	CAGL0C03223g,CAGL0D01958g,CAGL0E01705g,CAGL0I07227g,CAGL0L05236g,	25	7.65	10.14	0.0133035	0.665175
GO:0043436	oxoacid metabolic process	0.000471455	334	23	CAGL0B02717g,CAGL0B03047g,CAGL0B04543g,CAGL0C03223g,CAGL0C05115g,CAGL0D01892g,CAGL0D01958g,CAGL0D03586g,CAGL0E01705g,CAGL0E06138g,CAGL0G04851g,CAGL0H03905g,CAGL0H07579g,CAGL0I04994g,CAGL0I07227g,CAGL0J03058g,CAGL0J04268g,CAGL0J11836g,CAGL0K01837g,CAGL0K04125g,CAGL0L03982g,CAGL0L05236g,CAGL0M09020g,	6.9	2.11	2.37	0.0168522	0.859463
GO:0009161	ribonucleoside monophosphate metabolic process	0.000482924	87	10	CAGL0A01111g,CAGL0A03036g,CAGL0C04455g,CAGL0D00748g,CAGL0H01397g,CAGL0H07579g,CAGL0I00572g,CAGL0I06270g,CAGL0J00429g,CAGL0K02893g,	11.5	3.52	4.02	0.0169212	0.880371
GO:0006082	organic acid metabolic process	0.00049195	335	23	CAGL0B02717g,CAGL0B03047g,CAGL0B04543g,CAGL0C03223g,CAGL0C05115g,CAGL0D01892g,CAGL0D01958g,CAGL0D03586g,CAGL0E01705g,CAGL0E06138g,CAGL0G04851g,CAGL0H03905g,CAGL0H07579g,CAGL0I04994g,CAGL0I07227g,CAGL0J03058g,CAGL0J04268g,CAGL0J11836g,CAGL0K01837g,CAGL0K04125g,CAGL0L03982g,CAGL0L05236g,CAGL0M09020g,	6.9	2.1	2.36	0.0169212	0.896826
GO:0006333	chromatin assembly or disassembly	0.000551192	73	9	CAGL0C04114g,CAGL0C04136g,CAGL0C04389g,CAGL0C04411g,CAGL0E02315g,CAGL0H09834g,CAGL0K11440g,CAGL0K11462g,CAGL0M06655g,	12.3	3.77	4.34	0.0186078	1
GO:0072329	monocarboxylic acid catabolic process	0.000591445	33	6	CAGL0B02717g,CAGL0B04543g,CAGL0J03058g,CAGL0J11836g,CAGL0L03982g,CAGL0M09020g,	18.2	5.57	6.78	0.0196037	1
GO:0009147	pyrimidine nucleoside triphosphate metabolic process	0.000636858	6	3	CAGL0J03146g,CAGL0L09581g,CAGL0M13277g,	50	15.31	30.12	0.020732	1
GO:0009123	nucleoside monophosphate metabolic process	0.000693138	91	10	CAGL0A01111g,CAGL0A03036g,CAGL0C04455g,CAGL0D00748g,CAGL0H01397g,CAGL0H07579g,CAGL0I00572g,CAGL0I06270g,CAGL0J00429g,CAGL0K02893g,	11	3.36	3.82	0.0221683	1
GO:0071554	cell wall organization or biogenesis	0.000717209	239	18	CAGL0A04081g,CAGL0B04565g,CAGL0D01936g,CAGL0F07579g,CAGL0F07601g,CAGL0G00220g,CAGL0G04851g,CAGL0G09020g,CAGL0G09955g,CAGL0I06160g,CAGL0I08459g,CAGL0K09130g,CAGL0K12694g,CAGL0L01727g,CAGL0L06270g,CAGL0L06534g,CAGL0M04191g,CAGL0M08514g,	7.5	2.31	2.58	0.0222832	1
GO:0072350	tricarboxylic acid metabolic process	0.000731333	23	5	CAGL0C03223g,CAGL0D01958g,CAGL0E01705g,CAGL0I07227g,CAGL0L05236g,	21.7	6.66	8.44	0.0222832	1
GO:0065003	protein-containing complex assembly	0.000733402	411	26	CAGL0B02585g,CAGL0C04114g,CAGL0C04136g,CAGL0C04389g,CAGL0C04411g,CAGL0D03586g,CAGL0E02315g,CAGL0H02123g,CAGL0H09834g,CAGL0I00572g,CAGL0I03432g,CAGL0I04796g,CAGL0I08833g,CAGL0K01067g,CAGL0K05973g,CAGL0K08910g,CAGL0K11440g,CAGL0K11462g,CAGL0K11594g,CAGL0K12672g,CAGL0L05390g,CAGL0L06204g,CAGL0L06270g,CAGL0M06171g,CAGL0M06655g,CAGL0M13057g,	6.3	1.94	2.18	0.0222832	1
GO:0019318	hexose metabolic process	0.000821089	35	6	CAGL0C05335g,CAGL0E01705g,CAGL0H04939g,CAGL0H06633g,CAGL0H07579g,CAGL0K12848g,	17.1	5.25	6.31	0.0245384	1
GO:0034622	cellular protein-containing complex assembly	0.000863344	393	25	CAGL0B02585g,CAGL0C04114g,CAGL0C04136g,CAGL0C04389g,CAGL0C04411g,CAGL0D03586g,CAGL0E02315g,CAGL0H02123g,CAGL0H09834g,CAGL0I00572g,CAGL0I03432g,CAGL0I04796g,CAGL0K01067g,CAGL0K05973g,CAGL0K08910g,CAGL0K11440g,CAGL0K11462g,CAGL0K11594g,CAGL0K12672g,CAGL0L05390g,CAGL0L06204g,CAGL0L06270g,CAGL0M06171g,CAGL0M06655g,CAGL0M13057g,	6.4	1.95	2.18	0.0253851	1
GO:0072522	purine-containing compound biosynthetic process	0.000900202	78	9	CAGL0A01111g,CAGL0A03036g,CAGL0B02717g,CAGL0C04455g,CAGL0H01397g,CAGL0H07579g,CAGL0I00572g,CAGL0I04994g,CAGL0M13277g,	11.5	3.53	4.02	0.0260487	1
GO:0016051	carbohydrate biosynthetic process	0.00102199	64	8	CAGL0E01705g,CAGL0G09064g,CAGL0H04939g,CAGL0H06633g,CAGL0I08459g,CAGL0K12848g,CAGL0L06270g,CAGL0L06534g,	12.5	3.83	4.39	0.0291106	1
GO:0090036	regulation of protein kinase C signaling	0.00106071	2	2	CAGL0I08459g,CAGL0M01628g,	100	30.62	inf	0.0297488	1
GO:0000038	very long-chain fatty acid metabolic process	0.00108778	7	3	CAGL0G04851g,CAGL0K01837g,CAGL0K04125g,	42.9	13.12	22.59	0.0300458	1
GO:0071103	DNA conformation change	0.00114569	97	10	CAGL0C00341g,CAGL0C04114g,CAGL0C04136g,CAGL0C04389g,CAGL0C04411g,CAGL0E02315g,CAGL0H09834g,CAGL0K11440g,CAGL0K11462g,CAGL0M06655g,	10.3	3.16	3.55	0.031173	1
GO:0019637	organophosphate metabolic process	0.00122933	314	21	CAGL0A01111g,CAGL0A03036g,CAGL0B02717g,CAGL0C04455g,CAGL0D00748g,CAGL0G09955g,CAGL0H01397g,CAGL0H04543g,CAGL0H06699g,CAGL0H07579g,CAGL0I00572g,CAGL0I06270g,CAGL0J00429g,CAGL0J03146g,CAGL0J04268g,CAGL0J11836g,CAGL0K02893g,CAGL0L09581g,CAGL0L11902g,CAGL0M07315g,CAGL0M13277g,	6.7	2.05	2.28	0.0329569	1
GO:0071824	protein-DNA complex subunit organization	0.00135967	153	13	CAGL0C00495g,CAGL0C04114g,CAGL0C04136g,CAGL0C04389g,CAGL0C04411g,CAGL0E02315g,CAGL0H09834g,CAGL0I03432g,CAGL0K11440g,CAGL0K11462g,CAGL0K12694g,CAGL0L06270g,CAGL0M06655g,	8.5	2.6	2.89	0.0359228	1
GO:0009152	purine ribonucleotide biosynthetic process	0.00138581	67	8	CAGL0A01111g,CAGL0A03036g,CAGL0B02717g,CAGL0C04455g,CAGL0H01397g,CAGL0H07579g,CAGL0I00572g,CAGL0M13277g,	11.9	3.66	4.16	0.0360904	1
GO:0006754	ATP biosynthetic process	0.00148129	39	6	CAGL0A01111g,CAGL0A03036g,CAGL0C04455g,CAGL0H01397g,CAGL0H07579g,CAGL0I00572g,	15.4	4.71	5.54	0.0380337	1
GO:0006164	purine nucleotide biosynthetic process	0.00152767	68	8	CAGL0A01111g,CAGL0A03036g,CAGL0B02717g,CAGL0C04455g,CAGL0H01397g,CAGL0H07579g,CAGL0I00572g,CAGL0M13277g,	11.8	3.6	4.09	0.0386797	1
GO:0044283	small molecule biosynthetic process	0.00157628	277	19	CAGL0B03047g,CAGL0C05115g,CAGL0D01892g,CAGL0D03586g,CAGL0E01705g,CAGL0E06138g,CAGL0E06424g,CAGL0F04279g,CAGL0G04851g,CAGL0G09064g,CAGL0H03905g,CAGL0H04939g,CAGL0H06633g,CAGL0H07579g,CAGL0I04994g,CAGL0K03201g,CAGL0K04125g,CAGL0K12848g,CAGL0M13277g,	6.9	2.1	2.33	0.0393637	1
GO:0006094	gluconeogenesis	0.00169879	8	3	CAGL0E01705g,CAGL0H04939g,CAGL0H06633g,	37.5	11.48	18.07	0.0407485	1
GO:0044030	regulation of DNA methylation	0.00169879	8	3	CAGL0C04114g,CAGL0I04994g,CAGL0M06655g,	37.5	11.48	18.07	0.0407485	1
GO:0040030	regulation of molecular function, epigenetic	0.00169879	8	3	CAGL0C04114g,CAGL0I04994g,CAGL0M06655g,	37.5	11.48	18.07	0.0407485	1
GO:0051704	multi-organism process	0.00175214	413	25	CAGL0A04433g,CAGL0B04565g,CAGL0C04114g,CAGL0C04136g,CAGL0C05335g,CAGL0D01936g,CAGL0E03113g,CAGL0F07579g,CAGL0G00220g,CAGL0G09020g,CAGL0H03971g,CAGL0I04994g,CAGL0J03058g,CAGL0J11836g,CAGL0K03201g,CAGL0K09724g,CAGL0K11594g,CAGL0K12694g,CAGL0L06270g,CAGL0L06534g,CAGL0L12474g,CAGL0M04191g,CAGL0M06655g,CAGL0M07315g,CAGL0M13805g,	6.1	1.85	2.06	0.0414824	1
GO:0005996	monosaccharide metabolic process	0.00193418	41	6	CAGL0C05335g,CAGL0E01705g,CAGL0H04939g,CAGL0H06633g,CAGL0H07579g,CAGL0K12848g,	14.6	4.48	5.22	0.0452054	1
GO:0009260	ribonucleotide biosynthetic process	0.00202349	71	8	CAGL0A01111g,CAGL0A03036g,CAGL0B02717g,CAGL0C04455g,CAGL0H01397g,CAGL0H07579g,CAGL0I00572g,CAGL0M13277g,	11.3	3.45	3.89	0.0466939	1
GO:0009987	cellular process	0.00238276	3748	139	CAGL0A01111g,CAGL0A03036g,CAGL0A03117g,CAGL0A04081g,CAGL0A04433g,CAGL0B00704g,CAGL0B02585g,CAGL0B02717g,CAGL0B03047g,CAGL0B03465g,CAGL0B04543g,CAGL0B04565g,CAGL0C00341g,CAGL0C00495g,CAGL0C01507g,CAGL0C03223g,CAGL0C04114g,CAGL0C04136g,CAGL0C04389g,CAGL0C04411g,CAGL0C04455g,CAGL0C04697g,CAGL0C05115g,CAGL0C05335g,CAGL0D00748g,CAGL0D00858g,CAGL0D01892g,CAGL0D01936g,CAGL0D01958g,CAGL0D03586g,CAGL0E015…	3.7	1.14	1.72	0.0542973	1
GO:0031445	regulation of heterochromatin assembly	0.00248727	9	3	CAGL0C04114g,CAGL0K08910g,CAGL0M06655g,	33.3	10.21	15.05	0.055979	1
GO:0046390	ribose phosphate biosynthetic process	0.00287275	75	8	CAGL0A01111g,CAGL0A03036g,CAGL0B02717g,CAGL0C04455g,CAGL0H01397g,CAGL0H07579g,CAGL0I00572g,CAGL0M13277g,	10.7	3.27	3.66	0.063691	1
GO:0009062	fatty acid catabolic process	0.00289981	19	4	CAGL0J03058g,CAGL0J11836g,CAGL0L03982g,CAGL0M09020g,	21.1	6.45	8.06	0.063691	1
GO:0042759	long-chain fatty acid biosynthetic process	0.00311362	3	2	CAGL0D03586g,CAGL0E06138g,	66.7	20.41	59.92	0.066778	1
GO:0006796	phosphate-containing compound metabolic process	0.00348443	506	28	CAGL0A01111g,CAGL0A03036g,CAGL0B02717g,CAGL0C01507g,CAGL0C04455g,CAGL0D00748g,CAGL0F07007g,CAGL0G09020g,CAGL0G09955g,CAGL0H01397g,CAGL0H04543g,CAGL0H06699g,CAGL0H07579g,CAGL0H09878g,CAGL0I00572g,CAGL0I03938g,CAGL0I06270g,CAGL0J00429g,CAGL0J03146g,CAGL0J04268g,CAGL0J11836g,CAGL0K02893g,CAGL0K05071g,CAGL0L09581g,CAGL0L11902g,CAGL0L12474g,CAGL0M07315g,CAGL0M13277g,	5.5	1.69	1.88	0.0735506	1
GO:0044419	interspecies interaction between organisms	0.00351009	211	15	CAGL0B04565g,CAGL0C05335g,CAGL0D01936g,CAGL0E03113g,CAGL0G00220g,CAGL0G09020g,CAGL0H03971g,CAGL0I04994g,CAGL0J03058g,CAGL0K11594g,CAGL0L06270g,CAGL0L06534g,CAGL0M04191g,CAGL0M07315g,CAGL0M13805g,	7.1	2.18	2.39	0.0735506	1
GO:0065009	regulation of molecular function	0.0038384	213	15	CAGL0A01193g,CAGL0A03117g,CAGL0E02233g,CAGL0F03289g,CAGL0F07007g,CAGL0G02915g,CAGL0I08459g,CAGL0J06380g,CAGL0J09900g,CAGL0K09592g,CAGL0K12672g,CAGL0K12694g,CAGL0L06270g,CAGL0L12474g,CAGL0M01628g,	7	2.16	2.36	0.079516	1
GO:0050790	regulation of catalytic activity	0.00404969	173	13	CAGL0A01193g,CAGL0A03117g,CAGL0E02233g,CAGL0F03289g,CAGL0F07007g,CAGL0G02915g,CAGL0I08459g,CAGL0J06380g,CAGL0J09900g,CAGL0K12672g,CAGL0K12694g,CAGL0L06270g,CAGL0M01628g,	7.5	2.3	2.52	0.0829503	1
GO:0043933	protein-containing complex subunit organization	0.00423467	513	28	CAGL0B02585g,CAGL0C00495g,CAGL0C04114g,CAGL0C04136g,CAGL0C04389g,CAGL0C04411g,CAGL0D03586g,CAGL0E02315g,CAGL0H02123g,CAGL0H09834g,CAGL0I00572g,CAGL0I03432g,CAGL0I04796g,CAGL0I08833g,CAGL0K01067g,CAGL0K05973g,CAGL0K08910g,CAGL0K11440g,CAGL0K11462g,CAGL0K11594g,CAGL0K12672g,CAGL0K12694g,CAGL0L05390g,CAGL0L06204g,CAGL0L06270g,CAGL0M06171g,CAGL0M06655g,CAGL0M13057g,	5.5	1.67	1.85	0.0843183	1
GO:0042773	ATP synthesis coupled electron transport	0.00425523	21	4	CAGL0D00748g,CAGL0I06270g,CAGL0J00429g,CAGL0K02893g,	19	5.83	7.11	0.0843183	1
GO:0042775	mitochondrial ATP synthesis coupled electron transport	0.00425523	21	4	CAGL0D00748g,CAGL0I06270g,CAGL0J00429g,CAGL0K02893g,	19	5.83	7.11	0.0843183	1
GO:0009165	nucleotide biosynthetic process	0.00444664	98	9	CAGL0A01111g,CAGL0A03036g,CAGL0B02717g,CAGL0C04455g,CAGL0H01397g,CAGL0H07579g,CAGL0I00572g,CAGL0J03146g,CAGL0M13277g,	9.2	2.81	3.1	0.0857236	1
GO:0031505	fungal-type cell wall organization	0.00446722	175	13	CAGL0A04081g,CAGL0B04565g,CAGL0D01936g,CAGL0F07579g,CAGL0F07601g,CAGL0G00220g,CAGL0G09020g,CAGL0I06160g,CAGL0I08459g,CAGL0K09130g,CAGL0K12694g,CAGL0M04191g,CAGL0M08514g,	7.4	2.27	2.49	0.0857236	1
GO:0006793	phosphorus metabolic process	0.00485084	518	28	CAGL0A01111g,CAGL0A03036g,CAGL0B02717g,CAGL0C01507g,CAGL0C04455g,CAGL0D00748g,CAGL0F07007g,CAGL0G09020g,CAGL0G09955g,CAGL0H01397g,CAGL0H04543g,CAGL0H06699g,CAGL0H07579g,CAGL0H09878g,CAGL0I00572g,CAGL0I03938g,CAGL0I06270g,CAGL0J00429g,CAGL0J03146g,CAGL0J04268g,CAGL0J11836g,CAGL0K02893g,CAGL0K05071g,CAGL0L09581g,CAGL0L11902g,CAGL0L12474g,CAGL0M07315g,CAGL0M13277g,	5.4	1.66	1.83	0.0921155	1
GO:0022904	respiratory electron transport chain	0.00507023	22	4	CAGL0D00748g,CAGL0I06270g,CAGL0J00429g,CAGL0K02893g,	18.2	5.57	6.71	0.093364	1
GO:0006633	fatty acid biosynthetic process	0.00507023	22	4	CAGL0D03586g,CAGL0E06138g,CAGL0G04851g,CAGL0K04125g,	18.2	5.57	6.71	0.093364	1
GO:0006119	oxidative phosphorylation	0.00507023	22	4	CAGL0D00748g,CAGL0I06270g,CAGL0J00429g,CAGL0K02893g,	18.2	5.57	6.71	0.093364	1
GO:0008152	metabolic process	0.00534711	2852	110	CAGL0A01111g,CAGL0A03036g,CAGL0A03117g,CAGL0A04433g,CAGL0B00704g,CAGL0B02717g,CAGL0B03047g,CAGL0B03465g,CAGL0B04543g,CAGL0B04565g,CAGL0C00341g,CAGL0C01507g,CAGL0C03223g,CAGL0C04114g,CAGL0C04136g,CAGL0C04411g,CAGL0C04455g,CAGL0C04697g,CAGL0C05115g,CAGL0C05335g,CAGL0D00748g,CAGL0D00858g,CAGL0D01892g,CAGL0D01936g,CAGL0D01958g,CAGL0D03586g,CAGL0E01567g,CAGL0E01705g,CAGL0E02315g,CAGL0E06138g,CAGL0E064…	3.9	1.18	1.52	0.0957628	1
GO:0071555	cell wall organization	0.00540666	179	13	CAGL0A04081g,CAGL0B04565g,CAGL0D01936g,CAGL0F07579g,CAGL0F07601g,CAGL0G00220g,CAGL0G09020g,CAGL0I06160g,CAGL0I08459g,CAGL0K09130g,CAGL0K12694g,CAGL0M04191g,CAGL0M08514g,	7.3	2.22	2.43	0.0957628	1
GO:0045229	external encapsulating structure organization	0.00540666	179	13	CAGL0A04081g,CAGL0B04565g,CAGL0D01936g,CAGL0F07579g,CAGL0F07601g,CAGL0G00220g,CAGL0G09020g,CAGL0I06160g,CAGL0I08459g,CAGL0K09130g,CAGL0K12694g,CAGL0M04191g,CAGL0M08514g,	7.3	2.22	2.43	0.0957628	1
GO:1901293	nucleoside phosphate biosynthetic process	0.00542864	101	9	CAGL0A01111g,CAGL0A03036g,CAGL0B02717g,CAGL0C04455g,CAGL0H01397g,CAGL0H07579g,CAGL0I00572g,CAGL0J03146g,CAGL0M13277g,	8.9	2.73	3	0.0957628	1
GO:0043086	negative regulation of catalytic activity	0.00592024	51	6	CAGL0A01193g,CAGL0A03117g,CAGL0F07007g,CAGL0G02915g,CAGL0J06380g,CAGL0L06270g,	11.8	3.6	4.06	0.0957628	1
GO:0006006	glucose metabolic process	0.00598368	23	4	CAGL0E01705g,CAGL0H04939g,CAGL0H06633g,CAGL0H07579g,	17.4	5.32	6.36	0.0957628	1
GO:0022900	electron transport chain	0.00598368	23	4	CAGL0D00748g,CAGL0I06270g,CAGL0J00429g,CAGL0K02893g,	17.4	5.32	6.36	0.0957628	1
GO:0044238	primary metabolic process	0.00600447	2519	99	CAGL0A01111g,CAGL0A03036g,CAGL0A03117g,CAGL0B00704g,CAGL0B02717g,CAGL0B03047g,CAGL0B04543g,CAGL0B04565g,CAGL0C00341g,CAGL0C01507g,CAGL0C03223g,CAGL0C04114g,CAGL0C04136g,CAGL0C04411g,CAGL0C04455g,CAGL0C05115g,CAGL0C05335g,CAGL0D00748g,CAGL0D00858g,CAGL0D01892g,CAGL0D01936g,CAGL0D01958g,CAGL0D03586g,CAGL0E01567g,CAGL0E01705g,CAGL0E02315g,CAGL0E06138g,CAGL0E06424g,CAGL0F01045g,CAGL0F01727g,CAGL0F032…	3.9	1.2	1.49	0.0957628	1
GO:1904667	negative regulation of ubiquitin protein ligase activity	0.00609352	4	2	CAGL0A01193g,CAGL0L06270g,	50	15.31	29.95	0.0957628	1
GO:0046487	glyoxylate metabolic process	0.00609352	4	2	CAGL0J03058g,CAGL0L03982g,	50	15.31	29.95	0.0957628	1
GO:0009211	pyrimidine deoxyribonucleoside triphosphate metabolic process	0.00609352	4	2	CAGL0J03146g,CAGL0L09581g,	50	15.31	29.95	0.0957628	1
GO:0006108	malate metabolic process	0.00609352	4	2	CAGL0E01705g,CAGL0L05236g,	50	15.31	29.95	0.0957628	1
GO:0009148	pyrimidine nucleoside triphosphate biosynthetic process	0.00609352	4	2	CAGL0J03146g,CAGL0M13277g,	50	15.31	29.95	0.0957628	1
GO:0006577	amino-acid betaine metabolic process	0.00609352	4	2	CAGL0I08305g,CAGL0J11836g,	50	15.31	29.95	0.0957628	1
GO:0042761	very long-chain fatty acid biosynthetic process	0.00609352	4	2	CAGL0G04851g,CAGL0K04125g,	50	15.31	29.95	0.0957628	1
GO:0009437	carnitine metabolic process	0.00609352	4	2	CAGL0I08305g,CAGL0J11836g,	50	15.31	29.95	0.0957628	1
GO:0031454	regulation of extent of heterochromatin assembly	0.00609352	4	2	CAGL0C04114g,CAGL0M06655g,	50	15.31	29.95	0.0957628	1
GO:0044237	cellular metabolic process	0.00635086	2646	103	CAGL0A01111g,CAGL0A03036g,CAGL0A03117g,CAGL0B00704g,CAGL0B02717g,CAGL0B03047g,CAGL0B03465g,CAGL0B04543g,CAGL0B04565g,CAGL0C00341g,CAGL0C01507g,CAGL0C03223g,CAGL0C04114g,CAGL0C04136g,CAGL0C04411g,CAGL0C04455g,CAGL0C04697g,CAGL0C05115g,CAGL0D00748g,CAGL0D00858g,CAGL0D01892g,CAGL0D01936g,CAGL0D01958g,CAGL0D03586g,CAGL0E01567g,CAGL0E01705g,CAGL0E02315g,CAGL0E06138g,CAGL0E06424g,CAGL0F01045g,CAGL0F017…	3.9	1.19	1.49	0.098954	1
GO:1902600	proton transmembrane transport	0.00655007	37	5	CAGL0A01111g,CAGL0A03036g,CAGL0C04455g,CAGL0H01397g,CAGL0I00572g,	13.5	4.14	4.74	0.101193	1
GO:0006220	pyrimidine nucleotide metabolic process	0.00769045	13	3	CAGL0J03146g,CAGL0L09581g,CAGL0M13277g,	23.1	7.07	9.02	0.117813	1
GO:0055085	transmembrane transport	0.0080442	321	19	CAGL0A01111g,CAGL0A02233g,CAGL0A03036g,CAGL0C04455g,CAGL0D01958g,CAGL0E01705g,CAGL0F04213g,CAGL0H01397g,CAGL0H07579g,CAGL0I00572g,CAGL0I02134g,CAGL0I07447g,CAGL0J04114g,CAGL0J09900g,CAGL0K01067g,CAGL0K05973g,CAGL0K09592g,CAGL0L07546g,CAGL0M09020g,	5.9	1.81	1.97	0.12109	1
GO:0044703	multi-organism reproductive process	0.00810368	188	13	CAGL0A04433g,CAGL0C04114g,CAGL0C04136g,CAGL0E03113g,CAGL0F07579g,CAGL0G09020g,CAGL0K03201g,CAGL0K09724g,CAGL0K12694g,CAGL0L06270g,CAGL0L12474g,CAGL0M06655g,CAGL0M13805g,	6.9	2.12	2.3	0.12109	1
GO:0019953	sexual reproduction	0.00810368	188	13	CAGL0A04433g,CAGL0C04114g,CAGL0C04136g,CAGL0E03113g,CAGL0F07579g,CAGL0G09020g,CAGL0K03201g,CAGL0K09724g,CAGL0K12694g,CAGL0L06270g,CAGL0L12474g,CAGL0M06655g,CAGL0M13805g,	6.9	2.12	2.3	0.12109	1
GO:0044743	protein transmembrane import into intracellular organelle	0.00856167	55	6	CAGL0D01958g,CAGL0E01705g,CAGL0I02134g,CAGL0K01067g,CAGL0K05973g,CAGL0K09592g,	10.9	3.34	3.72	0.126894	1
GO:0044092	negative regulation of molecular function	0.00865712	72	7	CAGL0A01193g,CAGL0A03117g,CAGL0F07007g,CAGL0G02915g,CAGL0J06380g,CAGL0L06270g,CAGL0L12474g,	9.7	2.98	3.28	0.127274	1
GO:0071704	organic substance metabolic process	0.00886939	2670	103	CAGL0A01111g,CAGL0A03036g,CAGL0A03117g,CAGL0B00704g,CAGL0B02717g,CAGL0B03047g,CAGL0B03465g,CAGL0B04543g,CAGL0B04565g,CAGL0C00341g,CAGL0C01507g,CAGL0C03223g,CAGL0C04114g,CAGL0C04136g,CAGL0C04411g,CAGL0C04455g,CAGL0C05115g,CAGL0C05335g,CAGL0D00748g,CAGL0D00858g,CAGL0D01892g,CAGL0D01936g,CAGL0D01958g,CAGL0D03586g,CAGL0E01567g,CAGL0E01705g,CAGL0E02315g,CAGL0E06138g,CAGL0E06424g,CAGL0F01045g,CAGL0F017…	3.9	1.18	1.47	0.129351	1
GO:0044255	cellular lipid metabolic process	0.00931297	257	16	CAGL0B04543g,CAGL0D03586g,CAGL0E06138g,CAGL0E06424g,CAGL0G04851g,CAGL0G09955g,CAGL0H04543g,CAGL0J03058g,CAGL0J04268g,CAGL0J11836g,CAGL0K01837g,CAGL0K02739g,CAGL0K04125g,CAGL0L03982g,CAGL0M07315g,CAGL0M09020g,	6.2	1.91	2.06	0.132966	1
GO:0009127	purine nucleoside monophosphate biosynthetic process	0.00933606	56	6	CAGL0A01111g,CAGL0A03036g,CAGL0C04455g,CAGL0H01397g,CAGL0H07579g,CAGL0I00572g,	10.7	3.28	3.65	0.132966	1
GO:0009168	purine ribonucleoside monophosphate biosynthetic process	0.00933606	56	6	CAGL0A01111g,CAGL0A03036g,CAGL0C04455g,CAGL0H01397g,CAGL0H07579g,CAGL0I00572g,	10.7	3.28	3.65	0.132966	1
GO:0043708	cell adhesion involved in biofilm formation	0.00955575	14	3	CAGL0B04565g,CAGL0G09020g,CAGL0M13805g,	21.4	6.56	8.2	0.13504	1
GO:0009200	deoxyribonucleoside triphosphate metabolic process	0.00993835	5	2	CAGL0J03146g,CAGL0L09581g,	40	12.25	19.96	0.137255	1
GO:0051444	negative regulation of ubiquitin-protein transferase activity	0.00993835	5	2	CAGL0A01193g,CAGL0L06270g,	40	12.25	19.96	0.137255	1
GO:0006013	mannose metabolic process	0.00993835	5	2	CAGL0H07579g,CAGL0K12848g,	40	12.25	19.96	0.137255	1
GO:1901137	carbohydrate derivative biosynthetic process	0.0113818	218	14	CAGL0A01111g,CAGL0A03036g,CAGL0B02717g,CAGL0B04565g,CAGL0C04455g,CAGL0G09955g,CAGL0H01397g,CAGL0H07579g,CAGL0I00572g,CAGL0J03146g,CAGL0K12848g,CAGL0L06270g,CAGL0M07315g,CAGL0M13277g,	6.4	1.97	2.12	0.153696	1
GO:0006084	acetyl-CoA metabolic process	0.0116619	15	3	CAGL0B02717g,CAGL0J04268g,CAGL0J11836g,	20	6.12	7.52	0.156321	1
GO:0009156	ribonucleoside monophosphate biosynthetic process	0.0119585	59	6	CAGL0A01111g,CAGL0A03036g,CAGL0C04455g,CAGL0H01397g,CAGL0H07579g,CAGL0I00572g,	10.2	3.11	3.44	0.159126	1
GO:0009124	nucleoside monophosphate biosynthetic process	0.0139714	61	6	CAGL0A01111g,CAGL0A03036g,CAGL0C04455g,CAGL0H01397g,CAGL0H07579g,CAGL0I00572g,	9.8	3.01	3.31	0.178496	1
GO:0006629	lipid metabolic process	0.0144983	270	16	CAGL0B04543g,CAGL0D03586g,CAGL0E06138g,CAGL0E06424g,CAGL0G04851g,CAGL0G09955g,CAGL0H04543g,CAGL0J03058g,CAGL0J04268g,CAGL0J11836g,CAGL0K01837g,CAGL0K02739g,CAGL0K04125g,CAGL0L03982g,CAGL0M07315g,CAGL0M09020g,	5.9	1.81	1.95	0.178496	1
GO:0009218	pyrimidine ribonucleotide metabolic process	0.0145891	6	2	CAGL0J03146g,CAGL0M13277g,	33.3	10.21	14.97	0.178496	1
GO:0019692	deoxyribose phosphate metabolic process	0.0145891	6	2	CAGL0J03146g,CAGL0L09581g,	33.3	10.21	14.97	0.178496	1
GO:0044728	DNA methylation or demethylation	0.0145891	6	2	CAGL0C04114g,CAGL0M06655g,	33.3	10.21	14.97	0.178496	1
GO:0009394	2'-deoxyribonucleotide metabolic process	0.0145891	6	2	CAGL0J03146g,CAGL0L09581g,	33.3	10.21	14.97	0.178496	1
GO:0006306	DNA methylation	0.0145891	6	2	CAGL0C04114g,CAGL0M06655g,	33.3	10.21	14.97	0.178496	1
GO:0009219	pyrimidine deoxyribonucleotide metabolic process	0.0145891	6	2	CAGL0J03146g,CAGL0L09581g,	33.3	10.21	14.97	0.178496	1
GO:0032780	negative regulation of ATPase activity	0.0145891	6	2	CAGL0A03117g,CAGL0J06380g,	33.3	10.21	14.97	0.178496	1
GO:0001676	long-chain fatty acid metabolic process	0.0145891	6	2	CAGL0D03586g,CAGL0E06138g,	33.3	10.21	14.97	0.178496	1
GO:0006305	DNA alkylation	0.0145891	6	2	CAGL0C04114g,CAGL0M06655g,	33.3	10.21	14.97	0.178496	1
GO:0070911	global genome nucleotide-excision repair	0.0145891	6	2	CAGL0C04114g,CAGL0M06655g,	33.3	10.21	14.97	0.178496	1
GO:0051338	regulation of transferase activity	0.0150287	80	7	CAGL0A01193g,CAGL0E02233g,CAGL0G02915g,CAGL0I08459g,CAGL0J09900g,CAGL0K12672g,CAGL0L06270g,	8.8	2.68	2.92	0.181839	1
GO:0007264	small GTPase mediated signal transduction	0.0150618	62	6	CAGL0E03113g,CAGL0G09020g,CAGL0I08459g,CAGL0K12672g,CAGL0L06270g,CAGL0M12705g,	9.7	2.96	3.25	0.181839	1
GO:0052173	response to defenses of other organism involved in symbiotic interaction	0.0155139	30	4	CAGL0B04565g,CAGL0I04994g,CAGL0M04191g,CAGL0M13805g,	13.3	4.08	4.64	0.183648	1
GO:0051707	response to other organism	0.0155139	30	4	CAGL0B04565g,CAGL0I04994g,CAGL0M04191g,CAGL0M13805g,	13.3	4.08	4.64	0.183648	1
GO:0043207	response to external biotic stimulus	0.0155139	30	4	CAGL0B04565g,CAGL0I04994g,CAGL0M04191g,CAGL0M13805g,	13.3	4.08	4.64	0.183648	1
GO:0046395	carboxylic acid catabolic process	0.0162099	63	6	CAGL0B02717g,CAGL0B04543g,CAGL0J03058g,CAGL0J11836g,CAGL0L03982g,CAGL0M09020g,	9.5	2.92	3.19	0.189428	1
GO:0016054	organic acid catabolic process	0.0162099	63	6	CAGL0B02717g,CAGL0B04543g,CAGL0J03058g,CAGL0J11836g,CAGL0L03982g,CAGL0M09020g,	9.5	2.92	3.19	0.189428	1
GO:0052255	modulation by organism of defense response of other organism involved in symbiotic interaction	0.0166153	17	3	CAGL0I04994g,CAGL0M04191g,CAGL0M13805g,	17.6	5.4	6.44	0.191707	1
GO:0022607	cellular component assembly	0.0168649	621	30	CAGL0B02585g,CAGL0C04114g,CAGL0C04136g,CAGL0C04389g,CAGL0C04411g,CAGL0D03586g,CAGL0E02315g,CAGL0F07491g,CAGL0F07579g,CAGL0G02915g,CAGL0H02123g,CAGL0H09834g,CAGL0I00572g,CAGL0I03432g,CAGL0I04796g,CAGL0I08833g,CAGL0K01067g,CAGL0K05973g,CAGL0K08910g,CAGL0K11440g,CAGL0K11462g,CAGL0K11594g,CAGL0K12672g,CAGL0K12694g,CAGL0L05390g,CAGL0L06204g,CAGL0L06270g,CAGL0M06171g,CAGL0M06655g,CAGL0M13057g,	4.8	1.48	1.61	0.193363	1
GO:0044403	symbiont process	0.0170388	82	7	CAGL0B04565g,CAGL0G00220g,CAGL0G09020g,CAGL0I04994g,CAGL0L06534g,CAGL0M04191g,CAGL0M13805g,	8.5	2.61	2.84	0.194136	1
GO:0045454	cell redox homeostasis	0.0173694	31	4	CAGL0A04433g,CAGL0B00704g,CAGL0I04796g,CAGL0J09900g,	12.9	3.95	4.47	0.196673	1
GO:0015672	monovalent inorganic cation transport	0.017753	47	5	CAGL0A01111g,CAGL0A03036g,CAGL0C04455g,CAGL0H01397g,CAGL0I00572g,	10.6	3.26	3.6	0.197573	1
GO:0044262	cellular carbohydrate metabolic process	0.0177739	102	8	CAGL0G09020g,CAGL0G09064g,CAGL0H06699g,CAGL0I08459g,CAGL0J03058g,CAGL0L03982g,CAGL0L06270g,CAGL0L06534g,	7.8	2.4	2.59	0.197573	1
GO:0007568	aging	0.0186852	65	6	CAGL0H06699g,CAGL0H07579g,CAGL0K02739g,CAGL0K04125g,CAGL0K12694g,CAGL0L05236g,	9.2	2.83	3.08	0.205199	1
GO:0007569	cell aging	0.0186852	65	6	CAGL0H06699g,CAGL0H07579g,CAGL0K02739g,CAGL0K04125g,CAGL0K12694g,CAGL0L05236g,	9.2	2.83	3.08	0.205199	1
GO:0044843	cell cycle G1/S phase transition	0.0193089	48	5	CAGL0E01567g,CAGL0E02315g,CAGL0G07249g,CAGL0I03938g,CAGL0L12474g,	10.4	3.19	3.52	0.210008	1
GO:1900239	regulation of phenotypic switching	0.0194687	18	3	CAGL0G09020g,CAGL0I08459g,CAGL0M01628g,	16.7	5.1	6.01	0.210008	1
GO:0032878	regulation of establishment or maintenance of cell polarity	0.0194687	18	3	CAGL0I08459g,CAGL0L12474g,CAGL0M12705g,	16.7	5.1	6.01	0.210008	1
GO:0031397	negative regulation of protein ubiquitination	0.0199896	7	2	CAGL0A01193g,CAGL0L06270g,	28.6	8.75	11.97	0.210642	1
GO:1903321	negative regulation of protein modification by small protein conjugation or removal	0.0199896	7	2	CAGL0A01193g,CAGL0L06270g,	28.6	8.75	11.97	0.210642	1
GO:0044407	single-species biofilm formation in or on host organism	0.0199896	7	2	CAGL0G00220g,CAGL0L06534g,	28.6	8.75	11.97	0.210642	1
GO:0009262	deoxyribonucleotide metabolic process	0.0199896	7	2	CAGL0J03146g,CAGL0L09581g,	28.6	8.75	11.97	0.210642	1
GO:0006811	ion transport	0.0221687	237	14	CAGL0A01111g,CAGL0A03036g,CAGL0B04543g,CAGL0C04455g,CAGL0D01936g,CAGL0F04213g,CAGL0H01397g,CAGL0I00572g,CAGL0I04796g,CAGL0J08294g,CAGL0J09900g,CAGL0L07546g,CAGL0M09020g,CAGL0M13057g,	5.9	1.81	1.94	0.227603	1
GO:0044003	modification by symbiont of host morphology or physiology	0.0225753	19	3	CAGL0I04994g,CAGL0M04191g,CAGL0M13805g,	15.8	4.83	5.63	0.227603	1
GO:0007265	Ras protein signal transduction	0.0225753	19	3	CAGL0G09020g,CAGL0I08459g,CAGL0L06270g,	15.8	4.83	5.63	0.227603	1
GO:0006637	acyl-CoA metabolic process	0.0225753	19	3	CAGL0B02717g,CAGL0J04268g,CAGL0J11836g,	15.8	4.83	5.63	0.227603	1
GO:0035821	modification of morphology or physiology of other organism	0.0225753	19	3	CAGL0I04994g,CAGL0M04191g,CAGL0M13805g,	15.8	4.83	5.63	0.227603	1
GO:0051817	modification of morphology or physiology of other organism involved in symbiotic interaction	0.0225753	19	3	CAGL0I04994g,CAGL0M04191g,CAGL0M13805g,	15.8	4.83	5.63	0.227603	1
GO:0035383	thioester metabolic process	0.0225753	19	3	CAGL0B02717g,CAGL0J04268g,CAGL0J11836g,	15.8	4.83	5.63	0.227603	1
GO:0061024	membrane organization	0.022598	170	11	CAGL0D01936g,CAGL0D01958g,CAGL0E05258g,CAGL0F07579g,CAGL0H04543g,CAGL0I00572g,CAGL0K01067g,CAGL0K09592g,CAGL0K12672g,CAGL0K12694g,CAGL0M13057g,	6.5	1.98	2.12	0.227603	1
GO:0065002	intracellular protein transmembrane transport	0.0228646	68	6	CAGL0D01958g,CAGL0E01705g,CAGL0I02134g,CAGL0K01067g,CAGL0K05973g,CAGL0K09592g,	8.8	2.7	2.93	0.227772	1
GO:0071806	protein transmembrane transport	0.0228646	68	6	CAGL0D01958g,CAGL0E01705g,CAGL0I02134g,CAGL0K01067g,CAGL0K05973g,CAGL0K09592g,	8.8	2.7	2.93	0.227772	1
GO:1990542	mitochondrial transmembrane transport	0.0245058	51	5	CAGL0D01958g,CAGL0F04213g,CAGL0K01067g,CAGL0K05973g,CAGL0K09592g,	9.8	3	3.29	0.242794	1
GO:0032186	cellular bud neck septin ring organization	0.0260866	8	2	CAGL0I03938g,CAGL0I08459g,	25	7.65	9.98	0.249365	1
GO:1904666	regulation of ubiquitin protein ligase activity	0.0260866	8	2	CAGL0A01193g,CAGL0L06270g,	25	7.65	9.98	0.249365	1
GO:0034476	U5 snRNA 3'-end processing	0.0260866	8	2	CAGL0F01727g,CAGL0F03289g,	25	7.65	9.98	0.249365	1
GO:0032506	cytokinetic process	0.0264197	52	5	CAGL0F07491g,CAGL0I03938g,CAGL0I08459g,CAGL0K12694g,CAGL0L06270g,	9.6	2.94	3.21	0.249365	1
GO:0044242	cellular lipid catabolic process	0.0286834	36	4	CAGL0J03058g,CAGL0J11836g,CAGL0L03982g,CAGL0M09020g,	11.1	3.4	3.77	0.249365	1
GO:0008298	intracellular mRNA localization	0.029549	21	3	CAGL0F03289g,CAGL0F04257g,CAGL0K04543g,	14.3	4.37	5.01	0.249365	1
GO:0018130	heterocycle biosynthetic process	0.0304038	469	23	CAGL0A01111g,CAGL0A03036g,CAGL0B02717g,CAGL0C00341g,CAGL0C04114g,CAGL0C04136g,CAGL0C04455g,CAGL0D03586g,CAGL0F04257g,CAGL0F04279g,CAGL0H01397g,CAGL0H03509g,CAGL0H07579g,CAGL0H09834g,CAGL0I00572g,CAGL0I04994g,CAGL0J03146g,CAGL0K01969g,CAGL0K03201g,CAGL0K05071g,CAGL0K12848g,CAGL0M06655g,CAGL0M13277g,	4.9	1.5	1.61	0.249365	1
GO:0016042	lipid catabolic process	0.0313663	37	4	CAGL0J03058g,CAGL0J11836g,CAGL0L03982g,CAGL0M09020g,	10.8	3.31	3.65	0.249365	1
GO:0044282	small molecule catabolic process	0.0315677	93	7	CAGL0B02717g,CAGL0B04543g,CAGL0C05335g,CAGL0J03058g,CAGL0J11836g,CAGL0L03982g,CAGL0M09020g,	7.5	2.3	2.47	0.249365	1
GO:0090037	positive regulation of protein kinase C signaling	0.03266	1	1	CAGL0I08459g,	100	30.62	inf	0.249365	1
GO:0060178	regulation of exocyst localization	0.03266	1	1	CAGL0I08459g,	100	30.62	inf	0.249365	1
GO:1900377	negative regulation of secondary metabolite biosynthetic process	0.03266	1	1	CAGL0G09020g,	100	30.62	inf	0.249365	1
GO:1903098	negative regulation of CENP-A containing nucleosome assembly	0.03266	1	1	CAGL0E02315g,	100	30.62	inf	0.249365	1
GO:0051602	response to electrical stimulus	0.03266	1	1	CAGL0E03113g,	100	30.62	inf	0.249365	1
GO:0046039	GTP metabolic process	0.03266	1	1	CAGL0M13277g,	100	30.62	inf	0.249365	1
GO:1902280	regulation of ATP-dependent RNA helicase activity	0.03266	1	1	CAGL0A03117g,	100	30.62	inf	0.249365	1
GO:1990544	mitochondrial ATP transmembrane transport	0.03266	1	1	CAGL0F04213g,	100	30.62	inf	0.249365	1
GO:1990261	pre-mRNA catabolic process	0.03266	1	1	CAGL0K12672g,	100	30.62	inf	0.249365	1
GO:1902801	regulation of heterochromatin island assembly	0.03266	1	1	CAGL0K08910g,	100	30.62	inf	0.249365	1
GO:1904679	myo-inositol import across plasma membrane	0.03266	1	1	CAGL0I07447g,	100	30.62	inf	0.249365	1
GO:1903395	regulation of secondary cell septum biogenesis	0.03266	1	1	CAGL0I08459g,	100	30.62	inf	0.249365	1
GO:1901710	regulation of homoserine biosynthetic process	0.03266	1	1	CAGL0K09724g,	100	30.62	inf	0.249365	1
GO:0071788	endoplasmic reticulum tubular network maintenance	0.03266	1	1	CAGL0B02585g,	100	30.62	inf	0.249365	1
GO:0006532	aspartate biosynthetic process	0.03266	1	1	CAGL0D01892g,	100	30.62	inf	0.249365	1
GO:1905482	cytoplasmic sequestering of protein involved in G2 DNA damage checkpoint	0.03266	1	1	CAGL0L06270g,	100	30.62	inf	0.249365	1
GO:0072530	purine-containing compound transmembrane transport	0.03266	1	1	CAGL0F04213g,	100	30.62	inf	0.249365	1
GO:0015798	myo-inositol transport	0.03266	1	1	CAGL0I07447g,	100	30.62	inf	0.249365	1
GO:0090038	negative regulation of protein kinase C signaling	0.03266	1	1	CAGL0M01628g,	100	30.62	inf	0.249365	1
GO:0019679	propionate metabolic process, methylcitrate cycle	0.03266	1	1	CAGL0J04268g,	100	30.62	inf	0.249365	1
GO:0019307	mannose biosynthetic process	0.03266	1	1	CAGL0K12848g,	100	30.62	inf	0.249365	1
GO:0015741	fumarate transport	0.03266	1	1	CAGL0M09020g,	100	30.62	inf	0.249365	1
GO:0060635	positive regulation of (1->3)-beta-D-glucan biosynthetic process	0.03266	1	1	CAGL0I08459g,	100	30.62	inf	0.249365	1
GO:0140021	mitochondrial ADP transmembrane transport	0.03266	1	1	CAGL0F04213g,	100	30.62	inf	0.249365	1
GO:1905481	cytoplasmic sequestering of protein involved in mitotic DNA replication checkpoint	0.03266	1	1	CAGL0L06270g,	100	30.62	inf	0.249365	1
GO:0009061	anaerobic respiration	0.03266	1	1	CAGL0F04213g,	100	30.62	inf	0.249365	1
GO:0006183	GTP biosynthetic process	0.03266	1	1	CAGL0M13277g,	100	30.62	inf	0.249365	1
GO:1902281	negative regulation of ATP-dependent RNA helicase activity	0.03266	1	1	CAGL0A03117g,	100	30.62	inf	0.249365	1
GO:0015744	succinate transport	0.03266	1	1	CAGL0M09020g,	100	30.62	inf	0.249365	1
GO:1900533	palmitic acid metabolic process	0.03266	1	1	CAGL0E06138g,	100	30.62	inf	0.249365	1
GO:1904183	negative regulation of pyruvate dehydrogenase activity	0.03266	1	1	CAGL0F07007g,	100	30.62	inf	0.249365	1
GO:1900535	palmitic acid biosynthetic process	0.03266	1	1	CAGL0E06138g,	100	30.62	inf	0.249365	1
GO:0006729	tetrahydrobiopterin biosynthetic process	0.03266	1	1	CAGL0K03201g,	100	30.62	inf	0.249365	1
GO:0006228	UTP biosynthetic process	0.03266	1	1	CAGL0M13277g,	100	30.62	inf	0.249365	1
GO:1905507	cytoplasmic sequestering of protein involved in mitotic G2 DNA damage checkpoint	0.03266	1	1	CAGL0L06270g,	100	30.62	inf	0.249365	1
GO:0071257	cellular response to electrical stimulus	0.03266	1	1	CAGL0E03113g,	100	30.62	inf	0.249365	1
GO:0046051	UTP metabolic process	0.03266	1	1	CAGL0M13277g,	100	30.62	inf	0.249365	1
GO:0070206	protein trimerization	0.03266	1	1	CAGL0I08833g,	100	30.62	inf	0.249365	1
GO:0061508	CDP phosphorylation	0.03266	1	1	CAGL0M13277g,	100	30.62	inf	0.249365	1
GO:0046080	dUTP metabolic process	0.03266	1	1	CAGL0L09581g,	100	30.62	inf	0.249365	1
GO:1900760	negative regulation of sterigmatocystin biosynthetic process	0.03266	1	1	CAGL0G09020g,	100	30.62	inf	0.249365	1
GO:0052294	modulation by organism of cell-mediated immune response of other organism involved in symbiotic interaction	0.03266	1	1	CAGL0M04191g,	100	30.62	inf	0.249365	1
GO:0052155	modulation by symbiont of host cell-mediated immune response	0.03266	1	1	CAGL0M04191g,	100	30.62	inf	0.249365	1
GO:0046146	tetrahydrobiopterin metabolic process	0.03266	1	1	CAGL0K03201g,	100	30.62	inf	0.249365	1
GO:0034475	U4 snRNA 3'-end processing	0.0328292	9	2	CAGL0F01727g,CAGL0F03289g,	22.2	6.8	8.55	0.249365	1
GO:0032995	regulation of fungal-type cell wall biogenesis	0.0328292	9	2	CAGL0I08459g,CAGL0L06534g,	22.2	6.8	8.55	0.249365	1
GO:0006304	DNA modification	0.0328292	9	2	CAGL0C04114g,CAGL0M06655g,	22.2	6.8	8.55	0.249365	1
GO:0006839	mitochondrial transport	0.0330169	74	6	CAGL0D01958g,CAGL0F04213g,CAGL0J04114g,CAGL0K01067g,CAGL0K05973g,CAGL0K09592g,	8.1	2.48	2.67	0.24975	1
GO:0033157	regulation of intracellular protein transport	0.0334141	22	3	CAGL0G09020g,CAGL0J09900g,CAGL0L06270g,	13.6	4.18	4.74	0.251711	1
GO:0051701	interaction with host	0.0371614	39	4	CAGL0G09020g,CAGL0I04994g,CAGL0M04191g,CAGL0M13805g,	10.3	3.14	3.44	0.276983	1
GO:0044087	regulation of cellular component biogenesis	0.0374788	184	11	CAGL0C04114g,CAGL0E02315g,CAGL0G09020g,CAGL0I03938g,CAGL0I08459g,CAGL0K04543g,CAGL0K08910g,CAGL0L05390g,CAGL0L06270g,CAGL0L06534g,CAGL0M06655g,	6	1.83	1.94	0.276983	1
GO:0033865	nucleoside bisphosphate metabolic process	0.0375287	23	3	CAGL0B02717g,CAGL0J04268g,CAGL0J11836g,	13	3.99	4.5	0.276983	1
GO:0033875	ribonucleoside bisphosphate metabolic process	0.0375287	23	3	CAGL0B02717g,CAGL0J04268g,CAGL0J11836g,	13	3.99	4.5	0.276983	1
GO:0034032	purine nucleoside bisphosphate metabolic process	0.0375287	23	3	CAGL0B02717g,CAGL0J04268g,CAGL0J11836g,	13	3.99	4.5	0.276983	1
GO:1901576	organic substance biosynthetic process	0.0379795	1215	50	CAGL0A01111g,CAGL0A03036g,CAGL0B02717g,CAGL0B03047g,CAGL0B04565g,CAGL0C00341g,CAGL0C04114g,CAGL0C04136g,CAGL0C04455g,CAGL0C05115g,CAGL0D00858g,CAGL0D01892g,CAGL0D03586g,CAGL0E01705g,CAGL0E06138g,CAGL0E06424g,CAGL0F01045g,CAGL0F04257g,CAGL0F04279g,CAGL0G04851g,CAGL0G07931g,CAGL0G09064g,CAGL0G09955g,CAGL0H01397g,CAGL0H03509g,CAGL0H03905g,CAGL0H04543g,CAGL0H04565g,CAGL0H04939g,CAGL0H06633g,CAGL0H075…	4.1	1.26	1.38	0.27918	1
GO:0006066	alcohol metabolic process	0.0390416	77	6	CAGL0B03465g,CAGL0E06424g,CAGL0G09064g,CAGL0H06699g,CAGL0I08305g,CAGL0K03201g,	7.8	2.39	2.56	0.28165	1
GO:0006122	mitochondrial electron transport, ubiquinol to cytochrome c	0.0401694	10	2	CAGL0I06270g,CAGL0K02893g,	20	6.12	7.48	0.28165	1
GO:0006071	glycerol metabolic process	0.0401694	10	2	CAGL0G09064g,CAGL0H06699g,	20	6.12	7.48	0.28165	1
GO:0043457	regulation of cellular respiration	0.0401694	10	2	CAGL0G09020g,CAGL0K08624g,	20	6.12	7.48	0.28165	1
GO:0007105	cytokinesis, site selection	0.0401694	10	2	CAGL0I03938g,CAGL0I08459g,	20	6.12	7.48	0.28165	1
GO:0006213	pyrimidine nucleoside metabolic process	0.0401694	10	2	CAGL0J03146g,CAGL0M13277g,	20	6.12	7.48	0.28165	1
GO:0010515	negative regulation of induction of conjugation with cellular fusion	0.0401694	10	2	CAGL0G09020g,CAGL0L06270g,	20	6.12	7.48	0.28165	1
GO:0046131	pyrimidine ribonucleoside metabolic process	0.0401694	10	2	CAGL0J03146g,CAGL0M13277g,	20	6.12	7.48	0.28165	1
GO:0006283	transcription-coupled nucleotide-excision repair	0.0401694	10	2	CAGL0A03117g,CAGL0H03509g,	20	6.12	7.48	0.28165	1
GO:0019400	alditol metabolic process	0.0401694	10	2	CAGL0G09064g,CAGL0H06699g,	20	6.12	7.48	0.28165	1
GO:0019646	aerobic electron transport chain	0.0401694	10	2	CAGL0D00748g,CAGL0J00429g,	20	6.12	7.48	0.28165	1
GO:0006123	mitochondrial electron transport, cytochrome c to oxygen	0.0401694	10	2	CAGL0D00748g,CAGL0J00429g,	20	6.12	7.48	0.28165	1
GO:0090605	submerged biofilm formation	0.0411956	78	6	CAGL0B04565g,CAGL0G00220g,CAGL0G09020g,CAGL0J11836g,CAGL0L06534g,CAGL0M13805g,	7.7	2.36	2.52	0.287087	1
GO:1901362	organic cyclic compound biosynthetic process	0.0415079	510	24	CAGL0A01111g,CAGL0A03036g,CAGL0B02717g,CAGL0C00341g,CAGL0C04114g,CAGL0C04136g,CAGL0C04455g,CAGL0D03586g,CAGL0E06424g,CAGL0F04257g,CAGL0F04279g,CAGL0H01397g,CAGL0H03509g,CAGL0H07579g,CAGL0H09834g,CAGL0I00572g,CAGL0I04994g,CAGL0J03146g,CAGL0K01969g,CAGL0K03201g,CAGL0K05071g,CAGL0K12848g,CAGL0M06655g,CAGL0M13277g,	4.7	1.44	1.54	0.287087	1
GO:0030148	sphingolipid biosynthetic process	0.0418899	24	3	CAGL0G04851g,CAGL0K02739g,CAGL0M07315g,	12.5	3.83	4.29	0.287087	1
GO:0046939	nucleotide phosphorylation	0.0418899	24	3	CAGL0H07579g,CAGL0L11902g,CAGL0M13277g,	12.5	3.83	4.29	0.287087	1
GO:0046822	regulation of nucleocytoplasmic transport	0.0418899	24	3	CAGL0G09020g,CAGL0J09900g,CAGL0L06270g,	12.5	3.83	4.29	0.287087	1
GO:0051223	regulation of protein transport	0.0418899	24	3	CAGL0G09020g,CAGL0J09900g,CAGL0L06270g,	12.5	3.83	4.29	0.287087	1
GO:0034654	nucleobase-containing compound biosynthetic process	0.0447906	385	19	CAGL0A01111g,CAGL0A03036g,CAGL0B02717g,CAGL0C00341g,CAGL0C04114g,CAGL0C04136g,CAGL0C04455g,CAGL0F04257g,CAGL0H01397g,CAGL0H03509g,CAGL0H07579g,CAGL0H09834g,CAGL0I00572g,CAGL0J03146g,CAGL0K01969g,CAGL0K05071g,CAGL0K12848g,CAGL0M06655g,CAGL0M13277g,	4.9	1.51	1.6	0.305818	1
GO:0042710	biofilm formation	0.0457258	80	6	CAGL0B04565g,CAGL0G00220g,CAGL0G09020g,CAGL0J11836g,CAGL0L06534g,CAGL0M13805g,	7.5	2.3	2.45	0.311038	1
GO:0043709	cell adhesion involved in single-species biofilm formation	0.0480614	11	2	CAGL0G09020g,CAGL0M13805g,	18.2	5.57	6.65	0.323306	1
GO:0090316	positive regulation of intracellular protein transport	0.0480614	11	2	CAGL0G09020g,CAGL0J09900g,	18.2	5.57	6.65	0.323306	1
GO:0051438	regulation of ubiquitin-protein transferase activity	0.0480614	11	2	CAGL0A01193g,CAGL0L06270g,	18.2	5.57	6.65	0.323306	1
GO:0071702	organic substance transport	0.0485365	571	26	CAGL0A03117g,CAGL0B04543g,CAGL0D01936g,CAGL0D01958g,CAGL0E01705g,CAGL0E03113g,CAGL0F01045g,CAGL0F04213g,CAGL0G07667g,CAGL0H07579g,CAGL0I02134g,CAGL0I07447g,CAGL0I08459g,CAGL0I08833g,CAGL0J08294g,CAGL0J09900g,CAGL0K01067g,CAGL0K01353g,CAGL0K05973g,CAGL0K09592g,CAGL0K12672g,CAGL0K12694g,CAGL0K12848g,CAGL0L07546g,CAGL0M09020g,CAGL0M13057g,	4.6	1.39	1.49	0.325302	1
GO:0016053	organic acid biosynthetic process	0.0489025	169	10	CAGL0B03047g,CAGL0C05115g,CAGL0D01892g,CAGL0D03586g,CAGL0E06138g,CAGL0G04851g,CAGL0H03905g,CAGL0H07579g,CAGL0I04994g,CAGL0K04125g,	5.9	1.81	1.92	0.325362	1
GO:0009058	biosynthetic process	0.0499582	1236	50	CAGL0A01111g,CAGL0A03036g,CAGL0B02717g,CAGL0B03047g,CAGL0B04565g,CAGL0C00341g,CAGL0C04114g,CAGL0C04136g,CAGL0C04455g,CAGL0C05115g,CAGL0D00858g,CAGL0D01892g,CAGL0D03586g,CAGL0E01705g,CAGL0E06138g,CAGL0E06424g,CAGL0F01045g,CAGL0F04257g,CAGL0F04279g,CAGL0G04851g,CAGL0G07931g,CAGL0G09064g,CAGL0G09955g,CAGL0H01397g,CAGL0H03509g,CAGL0H03905g,CAGL0H04543g,CAGL0H04565g,CAGL0H04939g,CAGL0H06633g,CAGL0H075…	4	1.24	1.35	0.328086	1

## Sheet: Group 4
Supplementary file 2: List of GO-terms enriched from temporally induced genes in wildtype C. glabrata in response to macrophage infection
	GO-Term enrichment employing Candida genome database
GOID	GO_term	Corrected P-value	Cluster frequency	Background frequency	False discovery rate	Gene(s) annotated to the term	Directly Annotated GOID List
16052	carbohydrate catabolic process	7.88e-08	14 out of 210 genes, 6.7%	41 out of 5615 background genes, 0.7%	0	GPM1:CAGL0F04895g:CAGL0F08261g:PGI1:GCY1:GRE3:ENO1:CAGL0K03421g:CAGL0K05137g:CAGL0K11297g:FBA1:PGK1:PYK1:GND1	6096:30448:32889:5975:61610:51156:48315:71361:5978:46177:55114:6094:7163:61688:15810:15976:19255:6011:51211:9051:6090:19568:71470:19388:42843:5993:30003:34599:5992:71465:5980:6874:71497
6979	response to oxidative stress	3.57e-07	20 out of 210 genes, 9.5%	100 out of 5615 background genes, 1.8%	0	CAGL0B00836g:HBN1:GPX2:CAGL0E00649g:CAGL0E04774g:LYS7:CAGL0G03883g:TDH3:CAGL0H02585g:GLR1:CAGL0H09944g:CAGL0I00264g:GCY1:GRE3:HSP12:ZWF1:TRX2:CAGL0K05813g:AHP1:GND1	1900409:6006:61610:19538:6890:71248:1901098:1990355:42144:36245:70994:45454:6888:46177:11:1319:55114:1904184:70370:10038:1903614:19379:61688:6979:34605:422:1903715:6740:10731:80058:10972:43335:15680:61191:6915:9051:19568:6749:15886:70414:42744:6662:34975:32874:7155:6538:71470:1901524:19430:34614:45922:19388:7009:42843:42026:51085:35617:70262:34599:6470:1904359:30001:61692:71218:42542:72593:6878:1…
6096	glycolytic process	6.46e-06	9 out of 210 genes, 4.3%	19 out of 5615 background genes, 0.3%	0	GPM1:CAGL0F08261g:PGI1:ENO1:CAGL0K11297g:FBA1:PGK1:PYK1:GND1	6096:30448:32889:5975:48315:46177:6094:7163:61688:15810:15976:51211:9051:6090:34599
62197	cellular response to chemical stress	2.96e-05	21 out of 210 genes, 10.0%	140 out of 5615 background genes, 2.5%	0	CAGL0B00836g:HBN1:GPX2:CAGL0E00649g:CAGL0E00803g:LYS7:SSA1:CAGL0G03883g:TDH3:CAGL0H02585g:CAGL0H03707g:GLR1:CAGL0H09944g:CAGL0I00352g:GCY1:GRE3:HSP12:TRX2:CAGL0K05813g:AHP1:GND1	7010:1900409:6006:61610:6513:19538:90344:6890:6413:71248:1901098:1990355:42144:6353:36245:30433:2000639:70994:45454:6348:6888:722:6325:46177:70534:11:1319:55114:1904184:70370:10038:1903614:19379:61688:34605:70987:71596:422:1903715:10731:80058:10972:42275:71455:31497:70843:43335:15680:61191:724:6915:9051:19568:6749:15886:71894:43161:70414:42744:1990920:6457:35719:6662:34975:32874:7155:71629:6538:6…
6098	pentose-phosphate shunt	0.00037	6 out of 210 genes, 2.9%	10 out of 5615 background genes, 0.2%	0	TAL1:TKL1:SOL3:ZWF1:CAGL0L05478g:GND1	6006:5975:46177:61688:6740:9051:34599:6098:42542
16051	carbohydrate biosynthetic process	0.00225	10 out of 210 genes, 4.8%	43 out of 5615 background genes, 0.8%	0	GPD2:GPM1:TPS2:CAGL0H02387g:PGI1:KNH1:CAGL0K03421g:UGP1:PGK1:CAGL0M03377g	6096:48315:6116:34605:6114:19255:70413:6071:30003:46168:30448:51156:6078:5978:6094:7163:42546:5991:31505:6072:6011:51211:19388:5992:6874
70887	cellular response to chemical stimulus	0.00377	31 out of 210 genes, 14.8%	350 out of 5615 background genes, 6.2%	0	MIG1:CAGL0B00836g:HBN1:GPX2:CAGL0E00649g:CAGL0E00803g:LYS7:CAGL0F08745g:SSA1:CAGL0G03883g:CAGL0G08646g:TDH3:CAGL0H02585g:CAGL0H03707g:GLR1:CAGL0H09944g:CAGL0I00352g:GCY1:GRE3:CAGL0I05934g:HSP12:CAGL0J11462g:TRX2:CAGL0K02145g:CAGL0K05137g:CAGL0K05813g:CAGL0K07458g:CAGL0L07480g:CAGL0M08552g:AHP1:GND1	7010:71311:1900409:6006:19538:6890:43709:1901098:45944:71361:70994:45454:722:6325:46177:70534:11:6468:1904184:19379:61688:34605:10731:10972:1900436:31497:70843:724:321:6749:15886:71894:43161:42744:1990920:35719:6662:34975:7155:6511:71470:1901524:42276:749:42631:1900464:6366:42843:42026:51085:5993:6812:35617:70262:34599:2000221:30001:31571:6616:51569:71218:10390:209:42391:30307:16236:90155:80135:6…
42631	cellular response to water deprivation	0.02157	4 out of 210 genes, 1.9%	6 out of 5615 background genes, 0.1%	0.0006	CAGL0F08745g:CAGL0I05934g:CAGL0J11462g:CAGL0K05137g	71361:42631:5993:71465:120174:71497
6950	response to stress	0.03062	44 out of 210 genes, 21.0%	643 out of 5615 background genes, 11.5%	0.0005	CAGL0B00836g:HBN1:CAGL0B03619g:GPX2:TIR3:CAGL0E00649g:CAGL0E00803g:CAGL0E04752g:CAGL0E04774g:TIR2:LYS7:CAGL0F08745g:SSA1:CAGL0G03883g:TPS2:CAGL0G08063g:TDH3:CAGL0G09537g:CAGL0H02585g:CAGL0H03707g:GLR1:CAGL0H08844g:CAGL0H09592g:CAGL0H09614g:CAGL0H09944g:CAGL0I00264g:CAGL0I00352g:GCY1:GRE3:CAGL0I05934g:HSP12:CAGL0J04224g:ZWF1:CAGL0J11462g:TRX2:CAGL0K05137g:CAGL0K05813g:CAGL0K06699g:BMH1(A):CAGL0M02…	7010:1900409:6974:6006:19538:6890:31139:1901098:6270:6281:71361:70994:45454:1402:6458:722:6325:46177:70534:11:1904184:7039:43066:19379:61688:30474:35103:34605:6740:10731:10972:70914:31497:70843:10994:724:9847:6749:15886:71894:43161:6301:31638:70842:42744:1990920:70413:35719:6662:2:34975:727:7155:6511:71470:1901524:42276:42631:6914:35376:6366:42843:42026:51085:30466:5993:35617:70262:34599:9267:651…
5992	trehalose biosynthetic process	0.04885	4 out of 210 genes, 1.9%	7 out of 5615 background genes, 0.1%	0.001	TPS2:CAGL0H02387g:CAGL0K03421g:UGP1	34605:19255:70413:30003:51156:6078:5978:5991:31505:6011:19388:5992:6874
5975	carbohydrate metabolic process	3.12e-10	29 out of 210 genes, 13.8%	158 out of 5615 background genes, 2.8%	0	TAL1:GPD2:CAGL0E05654g:GPM1:CAGL0F04895g:CAGL0F08261g:CAGL0G03883g:TPS2:TDH3:CAGL0H02387g:PGI1:KNH1:CAGL0I00484g:GCY1:GRE3:SOL3:ENO1:CAGL0J02904g:ZWF1:CAGL0K03421g:CAGL0K05137g:CAGL0K11297g:UGP1:FBA1:CAGL0L05478g:PGK1:CAGL0M03377g:PYK1:GND1	70879:6096:6006:30448:32889:61610:19538:5975:34478:51156:48315:71361:70994:6078:6116:5978:46177:1319:55114:70370:6094:7163:61688:34605:42546:6073:6740:15810:5991:6114:31505:6072:15976:19255:43335:6915:6011:1904541:51211:6090:9051:19568:15886:70414:70413:34975:5977:6071:32874:71470:19388:51085:42026:42843:5993:30003:35617:34599:6470:46168:5992:71218:6098:71465:46475:5980:42542:6874:72593:71497
9132	nucleoside diphosphate metabolic process	5.84e-07	11 out of 210 genes, 5.2%	26 out of 5615 background genes, 0.5%	0	CAGL0D03432g:GPM1:CAGL0F08261g:CAGL0G04213g:PGI1:ENO1:CAGL0K11297g:FBA1:PGK1:PYK1:GND1	6096:30448:32889:5975:48315:9186:46177:55114:6094:7163:61688:15810:15976:51211:9051:6090:6240:34599:46704:9263
6091	generation of precursor metabolites and energy	8.43e-07	22 out of 210 genes, 10.5%	127 out of 5615 background genes, 2.3%	0	TAL1:TKL1:GPM1:CAGL0F04895g:CAGL0F08261g:PGI1:SOL3:ENO1:CAGL0I06831g:ADH1:CAGL0J02904g:ZWF1:CAGL0K03421g:CAGL0K11297g:UGP1:FBA1:CAGL0L05478g:PGK1:CAGL0M03377g:PDC:PYK1:GND1	6096:6006:30448:32889:5975:51156:6784:48315:6078:6116:5978:46177:6559:6094:7163:61688:6740:15810:15976:949:19255:6011:51211:6090:9051:5977:45069:19655:19388:30003:34599:6470:5992:6098:22904:5980:42542:6874:6569:43458:947
9185	ribonucleoside diphosphate metabolic process	2.59e-06	10 out of 210 genes, 4.8%	23 out of 5615 background genes, 0.4%	0	CAGL0D03432g:GPM1:CAGL0F08261g:PGI1:ENO1:CAGL0K11297g:FBA1:PGK1:PYK1:GND1	6096:30448:32889:5975:48315:46177:55114:6094:7163:61688:15810:15976:51211:9051:6090:6240:34599:46704:9263
6757	ATP generation from ADP	6.46e-06	9 out of 210 genes, 4.3%	19 out of 5615 background genes, 0.3%	0	GPM1:CAGL0F08261g:PGI1:ENO1:CAGL0K11297g:FBA1:PGK1:PYK1:GND1	6096:30448:32889:5975:48315:46177:6094:7163:61688:15810:15976:51211:9051:6090:34599
34599	cellular response to oxidative stress	1.12e-05	17 out of 210 genes, 8.1%	87 out of 5615 background genes, 1.5%	0	CAGL0B00836g:HBN1:GPX2:CAGL0E00649g:LYS7:CAGL0G03883g:TDH3:CAGL0H02585g:GLR1:CAGL0H09944g:GCY1:GRE3:HSP12:TRX2:CAGL0K05813g:AHP1:GND1	1900409:6006:61610:19538:6890:71248:1901098:1990355:42144:36245:70994:45454:6888:46177:11:1319:55114:1904184:70370:10038:1903614:19379:61688:34605:422:1903715:10731:80058:10972:43335:15680:61191:6915:9051:19568:6749:15886:70414:42744:6662:34975:32874:7155:6538:71470:1901524:19430:34614:45922:19388:7009:42843:42026:51085:35617:70262:34599:6470:1904359:30001:61692:71218:72593:6878:16236
46031	ADP metabolic process	1.13e-05	9 out of 210 genes, 4.3%	20 out of 5615 background genes, 0.4%	0	GPM1:CAGL0F08261g:PGI1:ENO1:CAGL0K11297g:FBA1:PGK1:PYK1:GND1	6096:30448:32889:5975:48315:46177:6094:7163:61688:15810:15976:51211:9051:6090:34599
6090	pyruvate metabolic process	1.67e-05	10 out of 210 genes, 4.8%	27 out of 5615 background genes, 0.5%	0	GPM1:CAGL0F08261g:PGI1:ENO1:CAGL0K11297g:FBA1:PGK1:PDC:PYK1:GND1	6096:30448:32889:5975:48315:46177:6559:6094:7163:61688:15810:15976:949:51211:9051:6090:45069:19655:34599:6569
44262	cellular carbohydrate metabolic process	1.77e-05	16 out of 210 genes, 7.6%	79 out of 5615 background genes, 1.4%	0	GPD2:CAGL0E05654g:CAGL0F04895g:CAGL0G03883g:TPS2:CAGL0H02387g:KNH1:CAGL0I00484g:GCY1:CAGL0J02904g:CAGL0K03421g:CAGL0K05137g:CAGL0K11297g:UGP1:CAGL0M03377g:GND1	70879:61610:19538:34478:51156:71361:6078:6116:5978:46177:55114:1319:70370:61688:34605:42546:6073:5991:6114:31505:6072:19255:43335:6011:1904541:9051:19568:70414:70413:5977:34975:6071:71470:19388:42843:42026:51085:5993:30003:35617:34599:6470:46168:5992:71218:71465:46475:5980:6874:71497
6165	nucleoside diphosphate phosphorylation	1.92e-05	9 out of 210 genes, 4.3%	21 out of 5615 background genes, 0.4%	0	GPM1:CAGL0F08261g:PGI1:ENO1:CAGL0K11297g:FBA1:PGK1:PYK1:GND1	6096:30448:32889:5975:48315:46177:6094:7163:61688:15810:15976:51211:9051:6090:34599
9135	purine nucleoside diphosphate metabolic process	1.92e-05	9 out of 210 genes, 4.3%	21 out of 5615 background genes, 0.4%	0	GPM1:CAGL0F08261g:PGI1:ENO1:CAGL0K11297g:FBA1:PGK1:PYK1:GND1	6096:30448:32889:5975:48315:46177:6094:7163:61688:15810:15976:51211:9051:6090:34599
9179	purine ribonucleoside diphosphate metabolic process	1.92e-05	9 out of 210 genes, 4.3%	21 out of 5615 background genes, 0.4%	0	GPM1:CAGL0F08261g:PGI1:ENO1:CAGL0K11297g:FBA1:PGK1:PYK1:GND1	6096:30448:32889:5975:48315:46177:6094:7163:61688:15810:15976:51211:9051:6090:34599
55114	oxidation-reduction process	2.01e-05	31 out of 210 genes, 14.8%	277 out of 5615 background genes, 4.9%	0	CAGL0B00836g:TAL1:GPX2:GPD2:TKL1:CAGL0D03432g:CAGL0F04895g:LYS7:CAGL0G04213g:TDH3:GLR1:CAGL0H09944g:CAGL0I00264g:GCY1:GRE3:SOL3:CAGL0I06831g:ADH1:CAGL0J02904g:ZWF1:TRX2:CAGL0K03421g:CAGL0K08844g:CAGL0K09702g:CAGL0K10274g:CAGL0K12100g:UGP1:CAGL0L05478g:CAGL0M03377g:PDC:GND1	1900409:6006:61610:5975:6890:71248:1990355:42144:51156:6784:36245:70994:9186:45454:6078:6116:5978:6888:46177:11:55114:6559:6744:19379:61688:6979:6740:10731:1901426:6114:80058:6072:949:19255:15680:6915:6011:6090:9051:19568:6749:15886:42744:6783:6662:5977:6240:32874:6071:71470:45069:19430:7005:34614:19655:19388:42843:6782:30003:34599:46704:6470:46168:5992:30001:61692:6098:9263:22904:5980:42542:6874…
46939	nucleotide phosphorylation	7.76e-05	9 out of 210 genes, 4.3%	24 out of 5615 background genes, 0.4%	0	GPM1:CAGL0F08261g:PGI1:ENO1:CAGL0K11297g:FBA1:PGK1:PYK1:GND1	6096:30448:32889:5975:48315:46177:6094:7163:61688:15810:15976:51211:9051:6090:34599
51156	glucose 6-phosphate metabolic process	0.0001	7 out of 210 genes, 3.3%	13 out of 5615 background genes, 0.2%	0	TAL1:TKL1:SOL3:ZWF1:CAGL0K03421g:CAGL0L05478g:GND1	6006:5975:51156:5978:46177:61688:6740:19255:6011:9051:19388:30003:34599:5992:6098:42542:6874
1901700	response to oxygen-containing compound	0.00016	14 out of 210 genes, 6.7%	70 out of 5615 background genes, 1.2%	0	GPX2:LYS7:CAGL0F08745g:CAGL0G03883g:GLR1:CAGL0I05934g:ZWF1:CAGL0J11462g:TRX2:CAGL0K02145g:CAGL0K05137g:CAGL0K05813g:CAGL0K07458g:CAGL0K09702g	80135:71311:1900409:6006:19538:6890:71248:1990355:42144:36245:71361:45454:6650:6888:11:1319:55114:6468:46777:70370:19379:18105:6740:10731:1901426:80058:43335:15680:60237:9051:71252:6749:70414:42744:6662:34975:71470:19430:34614:749:42631:42026:51085:5993:35617:34599:70941:61093:30001:61692:71218:71465:42542:120174:6878:90155:71497
1901701	cellular response to oxygen-containing compound	0.00037	12 out of 210 genes, 5.7%	54 out of 5615 background genes, 1.0%	0	GPX2:LYS7:CAGL0F08745g:CAGL0G03883g:GLR1:CAGL0I05934g:CAGL0J11462g:TRX2:CAGL0K02145g:CAGL0K05137g:CAGL0K05813g:CAGL0K07458g	80135:71311:1900409:19538:6890:71248:1990355:42144:36245:71361:45454:6650:6888:11:1319:55114:6468:46777:70370:19379:18105:10731:80058:43335:15680:60237:71252:6749:70414:42744:6662:34975:71470:19430:34614:749:42631:42026:51085:5993:35617:34599:70941:61093:30001:61692:71218:71465:120174:6878:90155:71497
1901615	organic hydroxy compound metabolic process	0.00072	16 out of 210 genes, 7.6%	102 out of 5615 background genes, 1.8%	0	CAGL0A01089g:GPD2:CAGL0D01980g:CAGL0E05654g:ERG6:CAGL0H09636g:GCY1:CAGL0I02970g:ADH1:CAGL0J02684g:CAGL0K05731g:CAGL0L03828g:ERG2:ERG10:PDC:CAGL0M10571g	1900563:61610:19619:723:34478:36182:16126:6116:1900560:51572:55114:6559:1903379:45461:44255:6066:6114:51573:6072:949:6090:19568:6071:45069:6696:19655:42843:8204:71441:34599:46168:16925:46475:6569:43458:947:16125:70988
6740	NADPH regeneration	0.00156	6 out of 210 genes, 2.9%	12 out of 5615 background genes, 0.2%	0	TAL1:TKL1:SOL3:ZWF1:CAGL0L05478g:GND1	6006:5975:46177:61688:6740:9051:34599:6098:42542
42221	response to chemical	0.00223	38 out of 210 genes, 18.1%	467 out of 5615 background genes, 8.3%	0	MIG1:CAGL0B00836g:HBN1:GPX2:CAGL0E00649g:CAGL0E00803g:LYS7:CAGL0F08745g:SSA1:CAGL0G03883g:CAGL0G08646g:TDH3:CAGL0H02585g:CAGL0H03707g:CAGL0H03839g:GLR1:CAGL0H09944g:CAGL0I00352g:GCY1:GRE3:CAGL0I05934g:TPO3:HSP12:CAGL0J07568g:ZWF1:CAGL0J11462g:TRX2:CAGL0K02145g:CAGL0K05137g:CAGL0K05813g:CAGL0K07458g:CAGL0K09702g:CAGL0L07480g:CAGL0M02937g:CAGL0M05379g:CAGL0M08552g:AHP1:GND1	7010:71311:1900409:6006:19538:6890:43709:1901098:45944:55085:71361:70994:45454:722:6325:46177:70534:11:6468:1904184:19379:61688:30474:34605:6740:10731:1901426:10972:1900436:31497:70843:724:321:6749:15886:71894:43161:42744:1990920:35719:6662:34975:7155:6511:71470:1901524:42276:749:42631:1900464:6366:42843:42026:51085:5993:6812:15805:35617:70262:34599:72665:2000221:30001:31571:6616:51569:71218:4254…
6739	NADP metabolic process	0.00771	6 out of 210 genes, 2.9%	15 out of 5615 background genes, 0.3%	0	TAL1:TKL1:SOL3:ZWF1:CAGL0L05478g:GND1	6006:46177:61688:6740:34599:6098:42542:5975:9051
5984	disaccharide metabolic process	0.01195	6 out of 210 genes, 2.9%	16 out of 5615 background genes, 0.3%	0	CAGL0G03883g:TPS2:CAGL0H02387g:CAGL0K03421g:CAGL0K05137g:UGP1	19538:71361:34605:19255:70413:34975:71470:42026:51085:5993:30003:35617:71218:51156:6078:5978:1319:70370:5991:31505:43335:6011:70414:19388:5992:71465:6874:71497
5991	trehalose metabolic process	0.01195	6 out of 210 genes, 2.9%	16 out of 5615 background genes, 0.3%	0	CAGL0G03883g:TPS2:CAGL0H02387g:CAGL0K03421g:CAGL0K05137g:UGP1	19538:71361:34605:19255:70413:34975:71470:42026:51085:5993:30003:35617:71218:51156:6078:5978:1319:70370:5991:31505:43335:6011:70414:19388:5992:71465:6874:71497
9056	catabolic process	0.01279	44 out of 210 genes, 21.0%	621 out of 5615 background genes, 11.1%	0	SCL1:CAGL0A04675g:CAGL0B03619g:CAGL0B04675g:GPX2:CAGL0C03245g:GPD2:CAGL0E00649g:CAGL0E04752g:CAGL0E05654g:GPM1:CAGL0F04895g:CAGL0F08261g:SSA1:CAGL0G07623g:CAGL0H02585g:CAGL0H03707g:PGI1:CAGL0H06545g:CAGL0H09636g:CAGL0I00352g:GCY1:GRE3:ENO1:CAGL0I05934g:ADH1:CAGL0J03916g:CAGL0J04224g:CAGL0J07568g:PLB2:PLB1:TRX2:CAGL0K03421g:CAGL0K05137g:CAGL0K11297g:FBA1:PGK1:CAGL0M02937g:CAGL0M05379g:CAGL0M06347g…	6096:1900409:32889:6890:19619:1901098:30011:48315:71361:45454:6116:6458:722:6325:46177:70534:11:6559:1904184:7039:19379:30474:61688:35103:34605:34497:6887:15810:6114:15976:31497:70843:19255:724:6090:71894:43161:31638:42744:1990920:35719:71211:6662:2:6071:6511:71470:1901524:70481:42276:34629:36151:42631:6914:6366:42026:42843:5993:30003:32258:70262:34599:16241:46938:9267:6515:72665:46168:44805:3157…
6066	alcohol metabolic process	0.02156	12 out of 210 genes, 5.7%	78 out of 5615 background genes, 1.4%	0.0006	CAGL0A01089g:GPD2:CAGL0E05654g:ERG6:GCY1:CAGL0I02970g:ADH1:CAGL0J02684g:ERG2:ERG10:PDC:CAGL0M10571g	6116:6559:6114:6090:6071:6696:42843:8204:34599:46168:6569:947:61610:34478:55114:6066:6072:949:19568:45069:19655:46475:43458:70988
9414	response to water deprivation	0.02157	4 out of 210 genes, 1.9%	6 out of 5615 background genes, 0.1%	0.0006	CAGL0F08745g:CAGL0I05934g:CAGL0J11462g:CAGL0K05137g	71361:42631:5993:71465:120174:71497
46034	ATP metabolic process	0.02172	11 out of 210 genes, 5.2%	66 out of 5615 background genes, 1.2%	0.0006	GPM1:CAGL0F08261g:PGI1:ENO1:ADH1:CAGL0K11297g:FBA1:PGK1:PDC:PYK1:GND1	6096:32889:48315:6116:46177:6559:61688:15810:15976:6090:34599:6569:947:30448:5975:6094:7163:949:51211:9051:45069:19655:43458
5996	monosaccharide metabolic process	0.02643	8 out of 210 genes, 3.8%	35 out of 5615 background genes, 0.6%	0.0006	GPM1:TDH3:PGI1:GCY1:GRE3:ZWF1:CAGL0K03421g:PGK1	6096:6006:48315:70994:6740:19255:15886:71470:42843:30003:34599:42542:30448:61610:51156:5978:55114:6094:7163:6915:6011:51211:9051:19568:32874:19388:5992:6874:72593
44281	small molecule metabolic process	0.02698	40 out of 210 genes, 19.0%	559 out of 5615 background genes, 10.0%	0.0005	CAGL0A01089g:RIB4:GPD2:CAGL0D03432g:CAGL0E05654g:GPM1:CAGL0F08261g:CAGL0G03905g:CAGL0G04213g:TDH3:CAGL0H02585g:ERG6:PGI1:CAGL0H06523g:CAGL0H09636g:GCY1:GRE3:ENO1:CAGL0I02970g:ADH1:CAGL0J02684g:CAGL0J06050g:CAGL0J07568g:ZWF1:TRX2:CAGL0K03421g:CAGL0K05731g:CAGL0K10274g:CAGL0K10296g:CAGL0K11297g:UGP1:FBA1:PGK1:ERG2:ERG10:PDC:CAGL0M08624g:CAGL0M10571g:PYK1:GND1	6096:1900409:6006:32889:6890:19619:36182:9231:9102:48315:70994:45454:9186:6116:1900560:46177:11:6520:6559:106035:45461:19379:61688:6740:15810:6114:51573:15976:19255:16226:6090:15886:42744:6662:6240:6071:71470:6696:42843:8204:30003:71441:34599:46704:46168:9263:42542:6508:6569:947:70183:1900563:70726:30448:5975:61610:723:1990355:34478:97428:42144:51156:6078:5978:6888:51572:55114:6744:1903379:6094:7…
46351	disaccharide biosynthetic process	0.04885	4 out of 210 genes, 1.9%	7 out of 5615 background genes, 0.1%	0.001	TPS2:CAGL0H02387g:CAGL0K03421g:UGP1	34605:19255:70413:30003:51156:6078:5978:5991:31505:6011:19388:5992:6874
9312	oligosaccharide biosynthetic process	0.04885	4 out of 210 genes, 1.9%	7 out of 5615 background genes, 0.1%	0.001	TPS2:CAGL0H02387g:CAGL0K03421g:UGP1	34605:19255:70413:30003:51156:6078:5978:5991:31505:6011:19388:5992:6874
16125	sterol metabolic process	0.04985	8 out of 210 genes, 3.8%	38 out of 5615 background genes, 0.7%	0.001	CAGL0D01980g:ERG6:CAGL0I02970g:CAGL0J02684g:CAGL0L03828g:ERG2:ERG10:CAGL0M10571g	16126:6696:8204:44255:16125:70988
9311	oligosaccharide metabolic process	0.05102	6 out of 210 genes, 2.9%	20 out of 5615 background genes, 0.4%	0.0009	CAGL0G03883g:TPS2:CAGL0H02387g:CAGL0K03421g:CAGL0K05137g:UGP1	19538:71361:34605:19255:70413:34975:71470:42026:51085:5993:30003:35617:71218:51156:6078:5978:1319:70370:5991:31505:43335:6011:70414:19388:5992:71465:6874:71497
19318	hexose metabolic process	0.05742	7 out of 210 genes, 3.3%	29 out of 5615 background genes, 0.5%	0.0014	GPM1:TDH3:PGI1:GRE3:ZWF1:CAGL0K03421g:PGK1	6096:6006:48315:70994:6740:19255:15886:71470:42843:30003:34599:42542:30448:51156:5978:55114:6094:7163:6915:6011:51211:9051:19568:32874:19388:5992:6874:72593
1901575	organic substance catabolic process	0.063	36 out of 210 genes, 17.1%	500 out of 5615 background genes, 8.9%	0.0018	SCL1:CAGL0B03619g:CAGL0B04675g:GPD2:CAGL0E04752g:CAGL0E05654g:GPM1:CAGL0F04895g:CAGL0F08261g:SSA1:CAGL0G07623g:CAGL0H02585g:CAGL0H03707g:PGI1:CAGL0H09636g:CAGL0I00352g:GCY1:GRE3:ENO1:CAGL0I05934g:ADH1:CAGL0J04224g:CAGL0J07568g:PLB2:PLB1:CAGL0K03421g:CAGL0K05137g:CAGL0K11297g:FBA1:PGK1:CAGL0M02937g:CAGL0M05379g:CAGL0M06347g:PDC:PYK1:GND1	6096:32889:19619:48315:71361:6116:6458:722:6325:46177:70534:6559:7039:30474:61688:35103:34605:15810:6114:15976:31497:70843:19255:724:6090:71894:43161:31638:1990920:35719:2:6071:6511:71470:70481:42276:36151:42631:6914:6366:42026:42843:5993:30003:34599:9267:6515:72665:46168:31571:6616:51569:747:5980:45727:10390:6508:6569:209:46514:947:30448:5975:61610:6513:90344:70966:6413:34478:60049:6353:51156:30…
72593	reactive oxygen species metabolic process	0.085	5 out of 210 genes, 2.4%	14 out of 5615 background genes, 0.2%	0.0017	GPX2:LYS7:TDH3:TRX2:CAGL0K05813g	1900409:6006:6890:70994:45454:11:19379:6749:15886:42744:6662:34599:30001:71248:1990355:42144:6888:55114:80058:15680:6915:32874:19430:34614:61692:72593:6878
8202	steroid metabolic process	0.08842	8 out of 210 genes, 3.8%	41 out of 5615 background genes, 0.7%	0.0017	CAGL0D01980g:ERG6:CAGL0I02970g:CAGL0J02684g:CAGL0L03828g:ERG2:ERG10:CAGL0M10571g	16126:6696:8204:44255:16125:70988
10035	response to inorganic substance	0.0895	10 out of 210 genes, 4.8%	64 out of 5615 background genes, 1.1%	0.0017	GPX2:LYS7:CAGL0F08745g:CAGL0I05934g:ZWF1:CAGL0J11462g:CAGL0K02145g:CAGL0K05137g:CAGL0K05813g:AHP1	6006:71361:45454:6740:6749:42744:42631:5993:34599:30001:42542:80135:71248:55114:10038:15680:9051:71252:19430:61692:71465:120174:6878:71497
71462	cellular response to water stimulus	0.09485	4 out of 210 genes, 1.9%	8 out of 5615 background genes, 0.1%	0.0016	CAGL0F08745g:CAGL0I05934g:CAGL0J11462g:CAGL0K05137g	71361:42631:5993:71465:120174:71497
9415	response to water	0.09485	4 out of 210 genes, 1.9%	8 out of 5615 background genes, 0.1%	0.0016	CAGL0F08745g:CAGL0I05934g:CAGL0J11462g:CAGL0K05137g	71361:42631:5993:71465:120174:71497
32787	monocarboxylic acid metabolic process	0.09939	14 out of 210 genes, 6.7%	119 out of 5615 background genes, 2.1%	0.0016	GPM1:CAGL0F08261g:CAGL0G03905g:PGI1:CAGL0H06523g:CAGL0H09636g:ENO1:CAGL0K10296g:CAGL0K11297g:FBA1:PGK1:PDC:PYK1:GND1	6096:32889:19619:9102:48315:46177:6559:106035:61688:15810:15976:16226:6090:34599:6569:30448:5975:97428:6094:7163:6083:949:51211:9051:45069:19655:15940
	GO-Term enrichment employing FungiDB database
ID	Name	Bgd count	Result count	Result gene list	Pct of bgd	Fold enrichment	Odds ratio	P-value	Benjamini	Bonferroni
GO:0005975	carbohydrate metabolic process	190	32	CAGL0B03069g,CAGL0C05137g,CAGL0E05654g,CAGL0E06358g,CAGL0F04895g,CAGL0F08261g,CAGL0G03883g,CAGL0G05335g,CAGL0G09383g,CAGL0H02387g,CAGL0H05445g,CAGL0H07997g,CAGL0I00484g,CAGL0I01100g,CAGL0I01122g,CAGL0I02200g,CAGL0I02486g,CAGL0I07843g,CAGL0J02904g,CAGL0J07612g,CAGL0K03421g,CAGL0K05137g,CAGL0K11297g,CAGL0L01925g,CAGL0L02497g,CAGL0L05478g,CAGL0L07722g,CAGL0L12056g,CAGL0M03377g,CAGL0M07920g,CAGL0M120…	16.8	4.25	5.61	1.21462e-12	2.02478e-09	2.02478e-09
GO:0046496	nicotinamide nucleotide metabolic process	53	17	CAGL0B03069g,CAGL0C05137g,CAGL0D01298g,CAGL0E06358g,CAGL0F08261g,CAGL0H05445g,CAGL0I02200g,CAGL0I02486g,CAGL0I07843g,CAGL0J07612g,CAGL0K11297g,CAGL0L02497g,CAGL0L05478g,CAGL0L07722g,CAGL0M07920g,CAGL0M12034g,CAGL0M13343g,	32.1	8.09	12.36	7.09374e-12	3.94175e-09	1.18253e-08
GO:0019362	pyridine nucleotide metabolic process	53	17	CAGL0B03069g,CAGL0C05137g,CAGL0D01298g,CAGL0E06358g,CAGL0F08261g,CAGL0H05445g,CAGL0I02200g,CAGL0I02486g,CAGL0I07843g,CAGL0J07612g,CAGL0K11297g,CAGL0L02497g,CAGL0L05478g,CAGL0L07722g,CAGL0M07920g,CAGL0M12034g,CAGL0M13343g,	32.1	8.09	12.36	7.09374e-12	3.94175e-09	1.18253e-08
GO:0009132	nucleoside diphosphate metabolic process	31	13	CAGL0D03432g,CAGL0E06358g,CAGL0F08261g,CAGL0G04213g,CAGL0H05445g,CAGL0I02486g,CAGL0I07843g,CAGL0K11297g,CAGL0L02497g,CAGL0L07722g,CAGL0M07920g,CAGL0M12034g,CAGL0M13343g,	41.9	10.58	18.58	4.54211e-11	1.37042e-08	7.5717e-08
GO:0006733	oxidoreduction coenzyme metabolic process	67	18	CAGL0B03069g,CAGL0C05137g,CAGL0D01298g,CAGL0E06358g,CAGL0F08261g,CAGL0H05445g,CAGL0I02200g,CAGL0I02486g,CAGL0I07843g,CAGL0J07612g,CAGL0K10274g,CAGL0K11297g,CAGL0L02497g,CAGL0L05478g,CAGL0L07722g,CAGL0M07920g,CAGL0M12034g,CAGL0M13343g,	26.9	6.78	9.64	4.76812e-11	1.37042e-08	7.94845e-08
GO:0072524	pyridine-containing compound metabolic process	59	17	CAGL0B03069g,CAGL0C05137g,CAGL0D01298g,CAGL0E06358g,CAGL0F08261g,CAGL0H05445g,CAGL0I02200g,CAGL0I02486g,CAGL0I07843g,CAGL0J07612g,CAGL0K11297g,CAGL0L02497g,CAGL0L05478g,CAGL0L07722g,CAGL0M07920g,CAGL0M12034g,CAGL0M13343g,	28.8	7.27	10.58	4.93254e-11	1.37042e-08	8.22254e-08
GO:0009185	ribonucleoside diphosphate metabolic process	28	12	CAGL0D03432g,CAGL0E06358g,CAGL0F08261g,CAGL0H05445g,CAGL0I02486g,CAGL0I07843g,CAGL0K11297g,CAGL0L02497g,CAGL0L07722g,CAGL0M07920g,CAGL0M12034g,CAGL0M13343g,	42.9	10.81	19.21	1.92017e-10	4.57274e-08	3.20092e-07
GO:0051186	cofactor metabolic process	186	28	CAGL0B03069g,CAGL0C01705g,CAGL0C05137g,CAGL0D01298g,CAGL0D03432g,CAGL0E06358g,CAGL0F08261g,CAGL0G03905g,CAGL0H05445g,CAGL0H05665g,CAGL0H06523g,CAGL0I02200g,CAGL0I02486g,CAGL0I06831g,CAGL0I07843g,CAGL0J07612g,CAGL0K00803g,CAGL0K05731g,CAGL0K05813g,CAGL0K10274g,CAGL0K11297g,CAGL0K12100g,CAGL0L02497g,CAGL0L05478g,CAGL0L07722g,CAGL0M07920g,CAGL0M12034g,CAGL0M13343g,	15.1	3.8	4.8	5.51528e-10	1.1417e-07	9.19398e-07
GO:0006979	response to oxidative stress	128	23	CAGL0B00836g,CAGL0B00990g,CAGL0C01705g,CAGL0E00649g,CAGL0E04774g,CAGL0F06017g,CAGL0G03883g,CAGL0G05335g,CAGL0G09383g,CAGL0H02585g,CAGL0H05665g,CAGL0H08844g,CAGL0H09944g,CAGL0I00264g,CAGL0I01100g,CAGL0I01122g,CAGL0J04202g,CAGL0J07612g,CAGL0K00803g,CAGL0K05813g,CAGL0K11858g,CAGL0M11704g,CAGL0M13343g,	18	4.53	5.84	6.16393e-10	1.1417e-07	1.02753e-06
GO:0046031	ADP metabolic process	25	11	CAGL0E06358g,CAGL0F08261g,CAGL0H05445g,CAGL0I02486g,CAGL0I07843g,CAGL0K11297g,CAGL0L02497g,CAGL0L07722g,CAGL0M07920g,CAGL0M12034g,CAGL0M13343g,	44	11.1	20.03	8.02742e-10	1.33817e-07	1.33817e-06
GO:0009179	purine ribonucleoside diphosphate metabolic process	26	11	CAGL0E06358g,CAGL0F08261g,CAGL0H05445g,CAGL0I02486g,CAGL0I07843g,CAGL0K11297g,CAGL0L02497g,CAGL0L07722g,CAGL0M07920g,CAGL0M12034g,CAGL0M13343g,	42.3	10.67	18.69	1.34346e-09	1.86629e-07	2.23955e-06
GO:0009135	purine nucleoside diphosphate metabolic process	26	11	CAGL0E06358g,CAGL0F08261g,CAGL0H05445g,CAGL0I02486g,CAGL0I07843g,CAGL0K11297g,CAGL0L02497g,CAGL0L07722g,CAGL0M07920g,CAGL0M12034g,CAGL0M13343g,	42.3	10.67	18.69	1.34346e-09	1.86629e-07	2.23955e-06
GO:0046434	organophosphate catabolic process	41	13	CAGL0C05137g,CAGL0E05654g,CAGL0E06358g,CAGL0F08261g,CAGL0H05445g,CAGL0I02486g,CAGL0J11748g,CAGL0J11770g,CAGL0K11297g,CAGL0L02497g,CAGL0L07722g,CAGL0M12034g,CAGL0M13343g,	31.7	8	11.92	2.72843e-09	3.49869e-07	4.5483e-06
GO:0016052	carbohydrate catabolic process	49	14	CAGL0E06358g,CAGL0F04895g,CAGL0F08261g,CAGL0H05445g,CAGL0I01100g,CAGL0I01122g,CAGL0I02486g,CAGL0K03421g,CAGL0K05137g,CAGL0K11297g,CAGL0L02497g,CAGL0L07722g,CAGL0M12034g,CAGL0M13343g,	28.6	7.21	10.31	3.04421e-09	3.62479e-07	5.0747e-06
GO:0034599	cellular response to oxidative stress	111	20	CAGL0B00836g,CAGL0B00990g,CAGL0C01705g,CAGL0E00649g,CAGL0F06017g,CAGL0G03883g,CAGL0G05335g,CAGL0G09383g,CAGL0H02585g,CAGL0H05665g,CAGL0H08844g,CAGL0H09944g,CAGL0I01100g,CAGL0I01122g,CAGL0J04202g,CAGL0K00803g,CAGL0K05813g,CAGL0K11858g,CAGL0M11704g,CAGL0M13343g,	18	4.54	5.78	8.28112e-09	9.20308e-07	1.38046e-05
GO:0006090	pyruvate metabolic process	31	11	CAGL0E06358g,CAGL0F08261g,CAGL0H05445g,CAGL0I02486g,CAGL0I07843g,CAGL0K11297g,CAGL0L02497g,CAGL0L07722g,CAGL0M07920g,CAGL0M12034g,CAGL0M13343g,	35.5	8.95	14	1.23554e-08	1.17191e-06	2.05965e-05
GO:0006096	glycolytic process	19	9	CAGL0E06358g,CAGL0F08261g,CAGL0H05445g,CAGL0I02486g,CAGL0K11297g,CAGL0L02497g,CAGL0L07722g,CAGL0M12034g,CAGL0M13343g,	47.4	11.95	22.73	1.33571e-08	1.17191e-06	2.22663e-05
GO:0006757	ATP generation from ADP	19	9	CAGL0E06358g,CAGL0F08261g,CAGL0H05445g,CAGL0I02486g,CAGL0K11297g,CAGL0L02497g,CAGL0L07722g,CAGL0M12034g,CAGL0M13343g,	47.4	11.95	22.73	1.33571e-08	1.17191e-06	2.22663e-05
GO:0042866	pyruvate biosynthetic process	19	9	CAGL0E06358g,CAGL0F08261g,CAGL0H05445g,CAGL0I02486g,CAGL0K11297g,CAGL0L02497g,CAGL0L07722g,CAGL0M12034g,CAGL0M13343g,	47.4	11.95	22.73	1.33571e-08	1.17191e-06	2.22663e-05
GO:0006165	nucleoside diphosphate phosphorylation	21	9	CAGL0E06358g,CAGL0F08261g,CAGL0H05445g,CAGL0I02486g,CAGL0K11297g,CAGL0L02497g,CAGL0L07722g,CAGL0M12034g,CAGL0M13343g,	42.9	10.81	18.94	3.96476e-08	3.30463e-06	6.60926e-05
GO:0006732	coenzyme metabolic process	126	20	CAGL0B03069g,CAGL0C05137g,CAGL0D01298g,CAGL0E06358g,CAGL0F08261g,CAGL0G03905g,CAGL0H05445g,CAGL0H06523g,CAGL0I02200g,CAGL0I02486g,CAGL0I07843g,CAGL0J07612g,CAGL0K10274g,CAGL0K11297g,CAGL0L02497g,CAGL0L05478g,CAGL0L07722g,CAGL0M07920g,CAGL0M12034g,CAGL0M13343g,	15.9	4	4.95	7.75273e-08	6.15419e-06	0.000129238
GO:0046939	nucleotide phosphorylation	24	9	CAGL0E06358g,CAGL0F08261g,CAGL0H05445g,CAGL0I02486g,CAGL0K11297g,CAGL0L02497g,CAGL0L07722g,CAGL0M12034g,CAGL0M13343g,	37.5	9.46	15.14	1.58922e-07	1.2042e-05	0.000264923
GO:0009166	nucleotide catabolic process	25	9	CAGL0E06358g,CAGL0F08261g,CAGL0H05445g,CAGL0I02486g,CAGL0K11297g,CAGL0L02497g,CAGL0L07722g,CAGL0M12034g,CAGL0M13343g,	36	9.08	14.19	2.39847e-07	1.73837e-05	0.000399825
GO:0006091	generation of precursor metabolites and energy	123	19	CAGL0E06358g,CAGL0F04895g,CAGL0F08261g,CAGL0H05445g,CAGL0I02486g,CAGL0I06831g,CAGL0I07843g,CAGL0J02904g,CAGL0K03421g,CAGL0K11297g,CAGL0L01925g,CAGL0L02497g,CAGL0L06732g,CAGL0L07722g,CAGL0L12056g,CAGL0M03377g,CAGL0M07920g,CAGL0M12034g,CAGL0M13343g,	15.4	3.9	4.77	2.60052e-07	1.80628e-05	0.000433506
GO:0019682	glyceraldehyde-3-phosphate metabolic process	10	6	CAGL0B03069g,CAGL0D01298g,CAGL0I02200g,CAGL0J07612g,CAGL0L05478g,CAGL0M13343g,	60	15.13	37.38	6.6521e-07	4.26502e-05	0.0011089
GO:0006098	pentose-phosphate shunt	10	6	CAGL0B03069g,CAGL0D01298g,CAGL0I02200g,CAGL0J07612g,CAGL0L05478g,CAGL0M13343g,	60	15.13	37.38	6.6521e-07	4.26502e-05	0.0011089
GO:1901292	nucleoside phosphate catabolic process	28	9	CAGL0E06358g,CAGL0F08261g,CAGL0H05445g,CAGL0I02486g,CAGL0K11297g,CAGL0L02497g,CAGL0L07722g,CAGL0M12034g,CAGL0M13343g,	32.1	8.11	11.94	7.30741e-07	4.51165e-05	0.00121815
GO:0019359	nicotinamide nucleotide biosynthetic process	29	9	CAGL0E06358g,CAGL0F08261g,CAGL0H05445g,CAGL0I02486g,CAGL0K11297g,CAGL0L02497g,CAGL0L07722g,CAGL0M12034g,CAGL0M13343g,	31	7.83	11.34	1.02347e-06	5.88318e-05	0.00170612
GO:0019363	pyridine nucleotide biosynthetic process	29	9	CAGL0E06358g,CAGL0F08261g,CAGL0H05445g,CAGL0I02486g,CAGL0K11297g,CAGL0L02497g,CAGL0L07722g,CAGL0M12034g,CAGL0M13343g,	31	7.83	11.34	1.02347e-06	5.88318e-05	0.00170612
GO:1901700	response to oxygen-containing compound	87	15	CAGL0C01705g,CAGL0F06017g,CAGL0F08745g,CAGL0G03883g,CAGL0H05665g,CAGL0I05934g,CAGL0J07612g,CAGL0J11462g,CAGL0K00803g,CAGL0K02145g,CAGL0K05137g,CAGL0K05813g,CAGL0K07458g,CAGL0K09702g,CAGL0L07480g,	17.2	4.35	5.36	1.1945e-06	6.63744e-05	0.00199123
GO:0051156	glucose 6-phosphate metabolic process	11	6	CAGL0B03069g,CAGL0D01298g,CAGL0I02200g,CAGL0J07612g,CAGL0L05478g,CAGL0M13343g,	54.5	13.76	29.89	1.4152e-06	7.43783e-05	0.00235915
GO:0055114	oxidation-reduction process	281	29	CAGL0B00836g,CAGL0C01705g,CAGL0C05137g,CAGL0D03432g,CAGL0F04895g,CAGL0F06017g,CAGL0G04213g,CAGL0G09383g,CAGL0H05665g,CAGL0H09944g,CAGL0I00264g,CAGL0I01100g,CAGL0I01122g,CAGL0I06831g,CAGL0I07843g,CAGL0J02904g,CAGL0J07612g,CAGL0K00803g,CAGL0K03421g,CAGL0K08844g,CAGL0K09702g,CAGL0K10274g,CAGL0K12100g,CAGL0L01925g,CAGL0L06732g,CAGL0L12056g,CAGL0M03377g,CAGL0M07920g,CAGL0M13343g,	10.3	2.6	3.07	1.42778e-06	7.43783e-05	0.00238011
GO:0044262	cellular carbohydrate metabolic process	102	16	CAGL0C05137g,CAGL0E05654g,CAGL0F04895g,CAGL0G03883g,CAGL0G05335g,CAGL0H02387g,CAGL0H07997g,CAGL0I00484g,CAGL0J02904g,CAGL0K03421g,CAGL0K05137g,CAGL0K11297g,CAGL0L01925g,CAGL0L12056g,CAGL0M03377g,CAGL0M13343g,	15.7	3.96	4.8	1.94097e-06	9.80484e-05	0.0032356
GO:1901701	cellular response to oxygen-containing compound	70	13	CAGL0C01705g,CAGL0F06017g,CAGL0F08745g,CAGL0G03883g,CAGL0H05665g,CAGL0I05934g,CAGL0J11462g,CAGL0K00803g,CAGL0K02145g,CAGL0K05137g,CAGL0K05813g,CAGL0K07458g,CAGL0L07480g,	18.6	4.68	5.82	2.64902e-06	0.00012988	0.00441591
GO:0005996	monosaccharide metabolic process	41	10	CAGL0E06358g,CAGL0G09383g,CAGL0H05445g,CAGL0I01100g,CAGL0I01122g,CAGL0I07843g,CAGL0J07612g,CAGL0K03421g,CAGL0L07722g,CAGL0M07920g,	24.4	6.15	8.15	2.95532e-06	0.000140757	0.00492651
GO:0019318	hexose metabolic process	35	9	CAGL0E06358g,CAGL0G09383g,CAGL0H05445g,CAGL0I01122g,CAGL0I07843g,CAGL0J07612g,CAGL0K03421g,CAGL0L07722g,CAGL0M07920g,	25.7	6.49	8.72	5.86152e-06	0.000266012	0.00977115
GO:0042221	response to chemical	659	49	CAGL0A01628g,CAGL0A04675g,CAGL0B00836g,CAGL0B00990g,CAGL0C01705g,CAGL0E00649g,CAGL0E03003g,CAGL0F06017g,CAGL0F08745g,CAGL0G03289g,CAGL0G03795g,CAGL0G03883g,CAGL0G04895g,CAGL0G05335g,CAGL0G08646g,CAGL0G09383g,CAGL0H02585g,CAGL0H03707g,CAGL0H03839g,CAGL0H04653g,CAGL0H05665g,CAGL0H08844g,CAGL0H09944g,CAGL0I00352g,CAGL0I01100g,CAGL0I01122g,CAGL0I01562g,CAGL0I02970g,CAGL0I05934g,CAGL0I10384g,CAGL0J042…	7.4	1.88	2.23	5.90429e-06	0.000266012	0.00984245
GO:1901615	organic hydroxy compound metabolic process	100	15	CAGL0A01089g,CAGL0C05137g,CAGL0D01980g,CAGL0E05654g,CAGL0H04653g,CAGL0H09636g,CAGL0I02970g,CAGL0I07843g,CAGL0J02684g,CAGL0K05731g,CAGL0L03828g,CAGL0L10714g,CAGL0L12364g,CAGL0M07920g,CAGL0M10571g,	15	3.78	4.53	7.2701e-06	0.000318928	0.0121193
GO:0072525	pyridine-containing compound biosynthetic process	36	9	CAGL0E06358g,CAGL0F08261g,CAGL0H05445g,CAGL0I02486g,CAGL0K11297g,CAGL0L02497g,CAGL0L07722g,CAGL0M12034g,CAGL0M13343g,	25	6.31	8.39	7.54949e-06	0.000322692	0.012585
GO:0019693	ribose phosphate metabolic process	127	17	CAGL0B03069g,CAGL0D01298g,CAGL0D03432g,CAGL0E06358g,CAGL0F08261g,CAGL0H05445g,CAGL0I02200g,CAGL0I02486g,CAGL0I07843g,CAGL0J07612g,CAGL0K11297g,CAGL0L02497g,CAGL0L05478g,CAGL0L07722g,CAGL0M07920g,CAGL0M12034g,CAGL0M13343g,	13.4	3.38	3.99	8.61729e-06	0.000359126	0.014365
GO:0044281	small molecule metabolic process	598	45	CAGL0A01089g,CAGL0B01419g,CAGL0B03069g,CAGL0C05137g,CAGL0D01298g,CAGL0D03432g,CAGL0E05654g,CAGL0E06358g,CAGL0F08261g,CAGL0G03905g,CAGL0G04213g,CAGL0G09383g,CAGL0H02585g,CAGL0H04653g,CAGL0H05445g,CAGL0H06523g,CAGL0H09636g,CAGL0I01100g,CAGL0I01122g,CAGL0I02200g,CAGL0I02486g,CAGL0I02970g,CAGL0I07843g,CAGL0J02684g,CAGL0J06050g,CAGL0J07568g,CAGL0J07612g,CAGL0K00803g,CAGL0K03421g,CAGL0K05731g,CAGL0K102…	7.5	1.9	2.24	1.15378e-05	0.000469111	0.0192335
GO:0006739	NADP metabolic process	15	6	CAGL0B03069g,CAGL0D01298g,CAGL0I02200g,CAGL0J07612g,CAGL0L05478g,CAGL0M13343g,	40	10.09	16.59	1.34097e-05	0.000532236	0.0223539
GO:0006754	ATP biosynthetic process	39	9	CAGL0E06358g,CAGL0F08261g,CAGL0H05445g,CAGL0I02486g,CAGL0K11297g,CAGL0L02497g,CAGL0L07722g,CAGL0M12034g,CAGL0M13343g,	23.1	5.82	7.55	1.53186e-05	0.000593864	0.0255362
GO:0070887	cellular response to chemical stimulus	515	40	CAGL0A01628g,CAGL0A04675g,CAGL0B00836g,CAGL0B00990g,CAGL0C01705g,CAGL0E00649g,CAGL0E03003g,CAGL0F06017g,CAGL0F08745g,CAGL0G03883g,CAGL0G04895g,CAGL0G05335g,CAGL0G08646g,CAGL0G09383g,CAGL0H02585g,CAGL0H03707g,CAGL0H04653g,CAGL0H05665g,CAGL0H08844g,CAGL0H09944g,CAGL0I00352g,CAGL0I01100g,CAGL0I01122g,CAGL0I02970g,CAGL0I05934g,CAGL0I10384g,CAGL0J04202g,CAGL0J11462g,CAGL0K00803g,CAGL0K02145g,CAGL0K051…	7.8	1.96	2.28	1.88189e-05	0.000691959	0.0313711
GO:0009206	purine ribonucleoside triphosphate biosynthetic process	40	9	CAGL0E06358g,CAGL0F08261g,CAGL0H05445g,CAGL0I02486g,CAGL0K11297g,CAGL0L02497g,CAGL0L07722g,CAGL0M12034g,CAGL0M13343g,	22.5	5.68	7.3	1.90942e-05	0.000691959	0.0318301
GO:0009145	purine nucleoside triphosphate biosynthetic process	40	9	CAGL0E06358g,CAGL0F08261g,CAGL0H05445g,CAGL0I02486g,CAGL0K11297g,CAGL0L02497g,CAGL0L07722g,CAGL0M12034g,CAGL0M13343g,	22.5	5.68	7.3	1.90942e-05	0.000691959	0.0318301
GO:0006006	glucose metabolic process	23	7	CAGL0E06358g,CAGL0G09383g,CAGL0H05445g,CAGL0I07843g,CAGL0J07612g,CAGL0L07722g,CAGL0M07920g,	30.4	7.68	10.93	1.98613e-05	0.000704443	0.0331088
GO:0051188	cofactor biosynthetic process	109	15	CAGL0D03432g,CAGL0E06358g,CAGL0F08261g,CAGL0G03905g,CAGL0H05445g,CAGL0H06523g,CAGL0I02486g,CAGL0I06831g,CAGL0K10274g,CAGL0K11297g,CAGL0K12100g,CAGL0L02497g,CAGL0L07722g,CAGL0M12034g,CAGL0M13343g,	13.8	3.47	4.09	2.122e-05	0.000736954	0.0353738
GO:0009117	nucleotide metabolic process	165	19	CAGL0B03069g,CAGL0C05137g,CAGL0D01298g,CAGL0D03432g,CAGL0E06358g,CAGL0F08261g,CAGL0G04213g,CAGL0H05445g,CAGL0I02200g,CAGL0I02486g,CAGL0I07843g,CAGL0J07612g,CAGL0K11297g,CAGL0L02497g,CAGL0L05478g,CAGL0L07722g,CAGL0M07920g,CAGL0M12034g,CAGL0M13343g,	11.5	2.9	3.37	2.31309e-05	0.000772485	0.0385592
GO:0034404	nucleobase-containing small molecule biosynthetic process	41	9	CAGL0E06358g,CAGL0F08261g,CAGL0H05445g,CAGL0I02486g,CAGL0K11297g,CAGL0L02497g,CAGL0L07722g,CAGL0M12034g,CAGL0M13343g,	22	5.54	7.07	2.36333e-05	0.000772485	0.0393968
GO:0009201	ribonucleoside triphosphate biosynthetic process	41	9	CAGL0E06358g,CAGL0F08261g,CAGL0H05445g,CAGL0I02486g,CAGL0K11297g,CAGL0L02497g,CAGL0L07722g,CAGL0M12034g,CAGL0M13343g,	22	5.54	7.07	2.36333e-05	0.000772485	0.0393968
GO:0072330	monocarboxylic acid biosynthetic process	62	11	CAGL0E06358g,CAGL0F08261g,CAGL0G03905g,CAGL0H05445g,CAGL0H06523g,CAGL0I02486g,CAGL0K11297g,CAGL0L02497g,CAGL0L07722g,CAGL0M12034g,CAGL0M13343g,	17.7	4.48	5.46	2.50683e-05	0.000803632	0.0417889
GO:0005991	trehalose metabolic process	17	6	CAGL0G03883g,CAGL0G05335g,CAGL0H02387g,CAGL0K03421g,CAGL0K05137g,CAGL0L01925g,	35.3	8.9	13.57	3.10145e-05	0.000975493	0.0517011
GO:0055086	nucleobase-containing small molecule metabolic process	199	21	CAGL0B03069g,CAGL0C05137g,CAGL0D01298g,CAGL0D03432g,CAGL0E06358g,CAGL0F08261g,CAGL0G04213g,CAGL0H05445g,CAGL0I02200g,CAGL0I02486g,CAGL0I07843g,CAGL0J07612g,CAGL0K03421g,CAGL0K11297g,CAGL0L01925g,CAGL0L02497g,CAGL0L05478g,CAGL0L07722g,CAGL0M07920g,CAGL0M12034g,CAGL0M13343g,	10.6	2.66	3.06	3.24389e-05	0.00100024	0.0540756
GO:0009414	response to water deprivation	6	4	CAGL0F08745g,CAGL0I05934g,CAGL0J11462g,CAGL0K05137g,	66.7	16.82	49.37	3.3838e-05	0.00100024	0.056408
GO:0042631	cellular response to water deprivation	6	4	CAGL0F08745g,CAGL0I05934g,CAGL0J11462g,CAGL0K05137g,	66.7	16.82	49.37	3.3838e-05	0.00100024	0.056408
GO:0016051	carbohydrate biosynthetic process	64	11	CAGL0C05137g,CAGL0E06358g,CAGL0G05335g,CAGL0H02387g,CAGL0H05445g,CAGL0H07997g,CAGL0K03421g,CAGL0L01925g,CAGL0L07722g,CAGL0L12056g,CAGL0M03377g,	17.2	4.34	5.25	3.42015e-05	0.00100024	0.0570138
GO:0046034	ATP metabolic process	65	11	CAGL0E06358g,CAGL0F08261g,CAGL0H05445g,CAGL0I02486g,CAGL0I07843g,CAGL0K11297g,CAGL0L02497g,CAGL0L07722g,CAGL0M07920g,CAGL0M12034g,CAGL0M13343g,	16.9	4.27	5.15	3.97564e-05	0.00114265	0.0662739
GO:0006066	alcohol metabolic process	77	12	CAGL0A01089g,CAGL0C05137g,CAGL0E05654g,CAGL0H04653g,CAGL0I02970g,CAGL0I07843g,CAGL0J02684g,CAGL0L03828g,CAGL0L10714g,CAGL0L12364g,CAGL0M07920g,CAGL0M10571g,	15.6	3.93	4.68	4.15345e-05	0.00115684	0.0692381
GO:0006753	nucleoside phosphate metabolic process	172	19	CAGL0B03069g,CAGL0C05137g,CAGL0D01298g,CAGL0D03432g,CAGL0E06358g,CAGL0F08261g,CAGL0G04213g,CAGL0H05445g,CAGL0I02200g,CAGL0I02486g,CAGL0I07843g,CAGL0J07612g,CAGL0K11297g,CAGL0L02497g,CAGL0L05478g,CAGL0L07722g,CAGL0M07920g,CAGL0M12034g,CAGL0M13343g,	11	2.79	3.21	4.16379e-05	0.00115684	0.0694103
GO:0009056	catabolic process	610	44	CAGL0A00407g,CAGL0A04675g,CAGL0B03619g,CAGL0B04675g,CAGL0C01705g,CAGL0C03245g,CAGL0C05137g,CAGL0E00649g,CAGL0E04752g,CAGL0E05654g,CAGL0E06358g,CAGL0F04895g,CAGL0F08261g,CAGL0G03795g,CAGL0G07623g,CAGL0H02585g,CAGL0H03707g,CAGL0H05445g,CAGL0H06545g,CAGL0H09636g,CAGL0I00352g,CAGL0I01100g,CAGL0I01122g,CAGL0I02486g,CAGL0I05934g,CAGL0I07843g,CAGL0J03916g,CAGL0J04224g,CAGL0J07568g,CAGL0J11748g,CAGL0J117…	7.2	1.82	2.12	4.28664e-05	0.00115922	0.0714584
GO:0009142	nucleoside triphosphate biosynthetic process	44	9	CAGL0E06358g,CAGL0F08261g,CAGL0H05445g,CAGL0I02486g,CAGL0K11297g,CAGL0L02497g,CAGL0L07722g,CAGL0M12034g,CAGL0M13343g,	20.5	5.16	6.46	4.31145e-05	0.00115922	0.0718719
GO:0005977	glycogen metabolic process	18	6	CAGL0F04895g,CAGL0J02904g,CAGL0K03421g,CAGL0L01925g,CAGL0L12056g,CAGL0M03377g,	33.3	8.41	12.44	4.4994e-05	0.00119055	0.0750049
GO:0009205	purine ribonucleoside triphosphate metabolic process	66	11	CAGL0E06358g,CAGL0F08261g,CAGL0H05445g,CAGL0I02486g,CAGL0I07843g,CAGL0K11297g,CAGL0L02497g,CAGL0L07722g,CAGL0M07920g,CAGL0M12034g,CAGL0M13343g,	16.7	4.2	5.06	4.60716e-05	0.00120002	0.0768014
GO:0009144	purine nucleoside triphosphate metabolic process	67	11	CAGL0E06358g,CAGL0F08261g,CAGL0H05445g,CAGL0I02486g,CAGL0I07843g,CAGL0K11297g,CAGL0L02497g,CAGL0L07722g,CAGL0M07920g,CAGL0M12034g,CAGL0M13343g,	16.4	4.14	4.97	5.32314e-05	0.0013445	0.0887367
GO:0009199	ribonucleoside triphosphate metabolic process	67	11	CAGL0E06358g,CAGL0F08261g,CAGL0H05445g,CAGL0I02486g,CAGL0I07843g,CAGL0K11297g,CAGL0L02497g,CAGL0L07722g,CAGL0M07920g,CAGL0M12034g,CAGL0M13343g,	16.4	4.14	4.97	5.32314e-05	0.0013445	0.0887367
GO:0052251	induction by organism of defense response of other organism involved in symbiotic interaction	12	5	CAGL0F08261g,CAGL0G03289g,CAGL0G09383g,CAGL0L07722g,CAGL0M12034g,	41.7	10.51	17.7	5.89047e-05	0.00138302	0.0981942
GO:0031349	positive regulation of defense response	12	5	CAGL0F08261g,CAGL0G03289g,CAGL0G09383g,CAGL0L07722g,CAGL0M12034g,	41.7	10.51	17.7	5.89047e-05	0.00138302	0.0981942
GO:0052509	positive regulation by symbiont of host defense response	12	5	CAGL0F08261g,CAGL0G03289g,CAGL0G09383g,CAGL0L07722g,CAGL0M12034g,	41.7	10.51	17.7	5.89047e-05	0.00138302	0.0981942
GO:0052510	positive regulation by organism of defense response of other organism involved in symbiotic interaction	12	5	CAGL0F08261g,CAGL0G03289g,CAGL0G09383g,CAGL0L07722g,CAGL0M12034g,	41.7	10.51	17.7	5.89047e-05	0.00138302	0.0981942
GO:0044416	induction by symbiont of host defense response	12	5	CAGL0F08261g,CAGL0G03289g,CAGL0G09383g,CAGL0L07722g,CAGL0M12034g,	41.7	10.51	17.7	5.89047e-05	0.00138302	0.0981942
GO:0016128	phytosteroid metabolic process	27	7	CAGL0H04653g,CAGL0I02970g,CAGL0J02684g,CAGL0L03828g,CAGL0L10714g,CAGL0L12364g,CAGL0M10571g,	25.9	6.54	8.74	6.28201e-05	0.00143454	0.104721
GO:0008204	ergosterol metabolic process	27	7	CAGL0H04653g,CAGL0I02970g,CAGL0J02684g,CAGL0L03828g,CAGL0L10714g,CAGL0L12364g,CAGL0M10571g,	25.9	6.54	8.74	6.28201e-05	0.00143454	0.104721
GO:0046351	disaccharide biosynthetic process	7	4	CAGL0G05335g,CAGL0H02387g,CAGL0K03421g,CAGL0L01925g,	57.1	14.41	32.91	7.6503e-05	0.00167803	0.12753
GO:0005992	trehalose biosynthetic process	7	4	CAGL0G05335g,CAGL0H02387g,CAGL0K03421g,CAGL0L01925g,	57.1	14.41	32.91	7.6503e-05	0.00167803	0.12753
GO:0009312	oligosaccharide biosynthetic process	7	4	CAGL0G05335g,CAGL0H02387g,CAGL0K03421g,CAGL0L01925g,	57.1	14.41	32.91	7.6503e-05	0.00167803	0.12753
GO:0032787	monocarboxylic acid metabolic process	122	15	CAGL0E06358g,CAGL0F08261g,CAGL0G03905g,CAGL0H05445g,CAGL0H06523g,CAGL0H09636g,CAGL0I02486g,CAGL0I07843g,CAGL0K10296g,CAGL0K11297g,CAGL0L02497g,CAGL0L07722g,CAGL0M07920g,CAGL0M12034g,CAGL0M13343g,	12.3	3.1	3.58	8.13932e-05	0.00176211	0.135682
GO:0006112	energy reserve metabolic process	20	6	CAGL0F04895g,CAGL0J02904g,CAGL0K03421g,CAGL0L01925g,CAGL0L12056g,CAGL0M03377g,	30	7.57	10.66	8.78801e-05	0.00187816	0.146496
GO:0031347	regulation of defense response	13	5	CAGL0F08261g,CAGL0G03289g,CAGL0G09383g,CAGL0L07722g,CAGL0M12034g,	38.5	9.7	15.48	9.26478e-05	0.00189951	0.154444
GO:0016125	sterol metabolic process	38	8	CAGL0D01980g,CAGL0H04653g,CAGL0I02970g,CAGL0J02684g,CAGL0L03828g,CAGL0L10714g,CAGL0L12364g,CAGL0M10571g,	21.1	5.31	6.68	9.34372e-05	0.00189951	0.15576
GO:0006073	cellular glucan metabolic process	38	8	CAGL0F04895g,CAGL0H07997g,CAGL0I00484g,CAGL0J02904g,CAGL0K03421g,CAGL0L01925g,CAGL0L12056g,CAGL0M03377g,	21.1	5.31	6.68	9.34372e-05	0.00189951	0.15576
GO:0044042	glucan metabolic process	38	8	CAGL0F04895g,CAGL0H07997g,CAGL0I00484g,CAGL0J02904g,CAGL0K03421g,CAGL0L01925g,CAGL0L12056g,CAGL0M03377g,	21.1	5.31	6.68	9.34372e-05	0.00189951	0.15576
GO:0006950	response to stress	792	52	CAGL0A04675g,CAGL0B00836g,CAGL0B00990g,CAGL0B03619g,CAGL0C01705g,CAGL0C03872g,CAGL0E00649g,CAGL0E04752g,CAGL0E04774g,CAGL0F01485g,CAGL0F04895g,CAGL0F06017g,CAGL0F08745g,CAGL0G03289g,CAGL0G03883g,CAGL0G05335g,CAGL0G08063g,CAGL0G09383g,CAGL0G09537g,CAGL0H02585g,CAGL0H03707g,CAGL0H05665g,CAGL0H08844g,CAGL0H09592g,CAGL0H09614g,CAGL0H09944g,CAGL0I00264g,CAGL0I00352g,CAGL0I01100g,CAGL0I01122g,CAGL0I059…	6.6	1.66	1.93	9.73345e-05	0.0019549	0.162257
GO:1902652	secondary alcohol metabolic process	29	7	CAGL0H04653g,CAGL0I02970g,CAGL0J02684g,CAGL0L03828g,CAGL0L10714g,CAGL0L12364g,CAGL0M10571g,	24.1	6.09	7.94	0.000103183	0.0020236	0.172006
GO:0044107	cellular alcohol metabolic process	29	7	CAGL0H04653g,CAGL0I02970g,CAGL0J02684g,CAGL0L03828g,CAGL0L10714g,CAGL0L12364g,CAGL0M10571g,	24.1	6.09	7.94	0.000103183	0.0020236	0.172006
GO:0005984	disaccharide metabolic process	21	6	CAGL0G03883g,CAGL0G05335g,CAGL0H02387g,CAGL0K03421g,CAGL0K05137g,CAGL0L01925g,	28.6	7.21	9.95	0.000118999	0.00226519	0.198372
GO:0071229	cellular response to acid chemical	21	6	CAGL0F08745g,CAGL0I05934g,CAGL0J11462g,CAGL0K02145g,CAGL0K05137g,CAGL0K07458g,	28.6	7.21	9.95	0.000118999	0.00226519	0.198372
GO:0009141	nucleoside triphosphate metabolic process	73	11	CAGL0E06358g,CAGL0F08261g,CAGL0H05445g,CAGL0I02486g,CAGL0I07843g,CAGL0K11297g,CAGL0L02497g,CAGL0L07722g,CAGL0M07920g,CAGL0M12034g,CAGL0M13343g,	15.1	3.8	4.48	0.000119578	0.00226519	0.199336
GO:0009108	coenzyme biosynthetic process	87	12	CAGL0E06358g,CAGL0F08261g,CAGL0G03905g,CAGL0H05445g,CAGL0H06523g,CAGL0I02486g,CAGL0K10274g,CAGL0K11297g,CAGL0L02497g,CAGL0L07722g,CAGL0M12034g,CAGL0M13343g,	13.8	3.48	4.05	0.000141274	0.00264611	0.235504
GO:0046165	alcohol biosynthetic process	51	9	CAGL0C05137g,CAGL0H04653g,CAGL0I02970g,CAGL0I07843g,CAGL0J02684g,CAGL0L03828g,CAGL0L10714g,CAGL0L12364g,CAGL0M07920g,	17.6	4.45	5.38	0.000145327	0.00268639	0.24226
GO:0009415	response to water	8	4	CAGL0F08745g,CAGL0I05934g,CAGL0J11462g,CAGL0K05137g,	50	12.61	24.67	0.000148259	0.00268639	0.247148
GO:0071462	cellular response to water stimulus	8	4	CAGL0F08745g,CAGL0I05934g,CAGL0J11462g,CAGL0K05137g,	50	12.61	24.67	0.000148259	0.00268639	0.247148
GO:0006081	cellular aldehyde metabolic process	22	6	CAGL0B03069g,CAGL0D01298g,CAGL0I02200g,CAGL0J07612g,CAGL0L05478g,CAGL0M13343g,	27.3	6.88	9.32	0.000158264	0.00283684	0.263826
GO:0008202	steroid metabolic process	41	8	CAGL0D01980g,CAGL0H04653g,CAGL0I02970g,CAGL0J02684g,CAGL0L03828g,CAGL0L10714g,CAGL0L12364g,CAGL0M10571g,	19.5	4.92	6.07	0.000164759	0.00292185	0.274654
GO:0046677	response to antibiotic	32	7	CAGL0C01705g,CAGL0I01562g,CAGL0J07568g,CAGL0J07612g,CAGL0K02145g,CAGL0K05137g,CAGL0K07458g,	21.9	5.52	6.98	0.000201052	0.00352793	0.335153
GO:0072593	reactive oxygen species metabolic process	16	5	CAGL0C01705g,CAGL0F06017g,CAGL0G09383g,CAGL0K00803g,CAGL0K05813g,	31.3	7.88	11.25	0.000285172	0.0049519	0.475382
GO:0009168	purine ribonucleoside monophosphate biosynthetic process	56	9	CAGL0E06358g,CAGL0F08261g,CAGL0H05445g,CAGL0I02486g,CAGL0K11297g,CAGL0L02497g,CAGL0L07722g,CAGL0M12034g,CAGL0M13343g,	16.1	4.05	4.8	0.000304648	0.00516965	0.507848
GO:0009127	purine nucleoside monophosphate biosynthetic process	56	9	CAGL0E06358g,CAGL0F08261g,CAGL0H05445g,CAGL0I02486g,CAGL0K11297g,CAGL0L02497g,CAGL0L07722g,CAGL0M12034g,CAGL0M13343g,	16.1	4.05	4.8	0.000304648	0.00516965	0.507848
GO:1901575	organic substance catabolic process	505	36	CAGL0A00407g,CAGL0B03619g,CAGL0B04675g,CAGL0C05137g,CAGL0E04752g,CAGL0E05654g,CAGL0E06358g,CAGL0F04895g,CAGL0F08261g,CAGL0G03795g,CAGL0G07623g,CAGL0H02585g,CAGL0H03707g,CAGL0H05445g,CAGL0H09636g,CAGL0I00352g,CAGL0I01100g,CAGL0I01122g,CAGL0I02486g,CAGL0I05934g,CAGL0I07843g,CAGL0J04224g,CAGL0J07568g,CAGL0J11748g,CAGL0J11770g,CAGL0K03421g,CAGL0K05137g,CAGL0K11297g,CAGL0L02497g,CAGL0L07722g,CAGL0M029…	7.1	1.8	2.04	0.000307016	0.00516965	0.511795
GO:0044248	cellular catabolic process	584	40	CAGL0A00407g,CAGL0A04675g,CAGL0B03619g,CAGL0B04675g,CAGL0C01705g,CAGL0C03245g,CAGL0E00649g,CAGL0E04752g,CAGL0E05654g,CAGL0E06358g,CAGL0F04895g,CAGL0F08261g,CAGL0G03795g,CAGL0G07623g,CAGL0H02585g,CAGL0H03707g,CAGL0H05445g,CAGL0H06545g,CAGL0H09636g,CAGL0I00352g,CAGL0I02486g,CAGL0I05934g,CAGL0I07843g,CAGL0J03916g,CAGL0J04224g,CAGL0J07568g,CAGL0J11748g,CAGL0J11770g,CAGL0K00803g,CAGL0K05137g,CAGL0K112…	6.8	1.73	1.96	0.000315789	0.0052642	0.52642
GO:0009311	oligosaccharide metabolic process	25	6	CAGL0G03883g,CAGL0G05335g,CAGL0H02387g,CAGL0K03421g,CAGL0K05137g,CAGL0L01925g,	24	6.05	7.85	0.000339975	0.00555626	0.566738
GO:0001101	response to acid chemical	25	6	CAGL0F08745g,CAGL0I05934g,CAGL0J11462g,CAGL0K02145g,CAGL0K05137g,CAGL0K07458g,	24	6.05	7.85	0.000339975	0.00555626	0.566738
GO:0052031	modulation by symbiont of host defense response	17	5	CAGL0F08261g,CAGL0G03289g,CAGL0G09383g,CAGL0L07722g,CAGL0M12034g,	29.4	7.42	10.32	0.000391071	0.00626842	0.651916
GO:0052255	modulation by organism of defense response of other organism involved in symbiotic interaction	17	5	CAGL0F08261g,CAGL0G03289g,CAGL0G09383g,CAGL0L07722g,CAGL0M12034g,	29.4	7.42	10.32	0.000391071	0.00626842	0.651916
GO:0009167	purine ribonucleoside monophosphate metabolic process	84	11	CAGL0E06358g,CAGL0F08261g,CAGL0H05445g,CAGL0I02486g,CAGL0I07843g,CAGL0K11297g,CAGL0L02497g,CAGL0L07722g,CAGL0M07920g,CAGL0M12034g,CAGL0M13343g,	13.1	3.3	3.8	0.000425579	0.00647897	0.70944
GO:0009126	purine nucleoside monophosphate metabolic process	84	11	CAGL0E06358g,CAGL0F08261g,CAGL0H05445g,CAGL0I02486g,CAGL0I07843g,CAGL0K11297g,CAGL0L02497g,CAGL0L07722g,CAGL0M07920g,CAGL0M12034g,CAGL0M13343g,	13.1	3.3	3.8	0.000425579	0.00647897	0.70944
GO:0044108	cellular alcohol biosynthetic process	26	6	CAGL0H04653g,CAGL0I02970g,CAGL0J02684g,CAGL0L03828g,CAGL0L10714g,CAGL0L12364g,	23.1	5.82	7.45	0.000427526	0.00647897	0.712686
GO:0016129	phytosteroid biosynthetic process	26	6	CAGL0H04653g,CAGL0I02970g,CAGL0J02684g,CAGL0L03828g,CAGL0L10714g,CAGL0L12364g,	23.1	5.82	7.45	0.000427526	0.00647897	0.712686
GO:0006696	ergosterol biosynthetic process	26	6	CAGL0H04653g,CAGL0I02970g,CAGL0J02684g,CAGL0L03828g,CAGL0L10714g,CAGL0L12364g,	23.1	5.82	7.45	0.000427526	0.00647897	0.712686
GO:0097384	cellular lipid biosynthetic process	26	6	CAGL0H04653g,CAGL0I02970g,CAGL0J02684g,CAGL0L03828g,CAGL0L10714g,CAGL0L12364g,	23.1	5.82	7.45	0.000427526	0.00647897	0.712686
GO:0009156	ribonucleoside monophosphate biosynthetic process	59	9	CAGL0E06358g,CAGL0F08261g,CAGL0H05445g,CAGL0I02486g,CAGL0K11297g,CAGL0L02497g,CAGL0L07722g,CAGL0M12034g,CAGL0M13343g,	15.3	3.85	4.51	0.000455757	0.00684456	0.759746
GO:1901135	carbohydrate derivative metabolic process	311	25	CAGL0B03069g,CAGL0B04675g,CAGL0C05137g,CAGL0D01298g,CAGL0D03432g,CAGL0E06358g,CAGL0F08261g,CAGL0G04213g,CAGL0H05445g,CAGL0I02200g,CAGL0I02486g,CAGL0I04774g,CAGL0I07843g,CAGL0J07612g,CAGL0K03421g,CAGL0K11297g,CAGL0L01925g,CAGL0L02497g,CAGL0L05478g,CAGL0L07722g,CAGL0L12056g,CAGL0M07381g,CAGL0M07920g,CAGL0M12034g,CAGL0M13343g,	8	2.03	2.27	0.00049859	0.00742097	0.831149
GO:0044283	small molecule biosynthetic process	277	23	CAGL0B01419g,CAGL0C05137g,CAGL0E06358g,CAGL0F08261g,CAGL0G03905g,CAGL0H04653g,CAGL0H05445g,CAGL0H06523g,CAGL0I02486g,CAGL0I02970g,CAGL0I07843g,CAGL0J02684g,CAGL0K00803g,CAGL0K10274g,CAGL0K11297g,CAGL0L02497g,CAGL0L03828g,CAGL0L07722g,CAGL0L10714g,CAGL0L12364g,CAGL0M07920g,CAGL0M12034g,CAGL0M13343g,	8.3	2.09	2.34	0.000536828	0.0079194	0.894892
GO:0019637	organophosphate metabolic process	314	25	CAGL0B03069g,CAGL0C05137g,CAGL0D01298g,CAGL0D03432g,CAGL0E05654g,CAGL0E06358g,CAGL0F08261g,CAGL0G04213g,CAGL0H05005g,CAGL0H05445g,CAGL0I02200g,CAGL0I02486g,CAGL0I07843g,CAGL0J07612g,CAGL0J11748g,CAGL0J11770g,CAGL0K03421g,CAGL0K07458g,CAGL0K11297g,CAGL0L02497g,CAGL0L05478g,CAGL0L07722g,CAGL0M07920g,CAGL0M12034g,CAGL0M13343g,	8	2.01	2.24	0.000575664	0.0083664	0.959632
GO:0009161	ribonucleoside monophosphate metabolic process	87	11	CAGL0E06358g,CAGL0F08261g,CAGL0H05445g,CAGL0I02486g,CAGL0I07843g,CAGL0K11297g,CAGL0L02497g,CAGL0L07722g,CAGL0M07920g,CAGL0M12034g,CAGL0M13343g,	12.6	3.19	3.64	0.000578116	0.0083664	0.963719
GO:0009124	nucleoside monophosphate biosynthetic process	61	9	CAGL0E06358g,CAGL0F08261g,CAGL0H05445g,CAGL0I02486g,CAGL0K11297g,CAGL0L02497g,CAGL0L07722g,CAGL0M12034g,CAGL0M13343g,	14.8	3.72	4.34	0.000587204	0.0083664	0.978869
GO:1901617	organic hydroxy compound biosynthetic process	61	9	CAGL0C05137g,CAGL0H04653g,CAGL0I02970g,CAGL0I07843g,CAGL0J02684g,CAGL0L03828g,CAGL0L10714g,CAGL0L12364g,CAGL0M07920g,	14.8	3.72	4.34	0.000587204	0.0083664	0.978869
GO:0017144	drug metabolic process	195	18	CAGL0B01419g,CAGL0C01705g,CAGL0E06358g,CAGL0F08261g,CAGL0G03905g,CAGL0H05445g,CAGL0H09636g,CAGL0I02486g,CAGL0I07843g,CAGL0K00803g,CAGL0K10296g,CAGL0K11297g,CAGL0L02497g,CAGL0L07722g,CAGL0L12056g,CAGL0M07920g,CAGL0M12034g,CAGL0M13343g,	9.2	2.33	2.6	0.000644219	0.00910096	1
GO:1902653	secondary alcohol biosynthetic process	28	6	CAGL0H04653g,CAGL0I02970g,CAGL0J02684g,CAGL0L03828g,CAGL0L10714g,CAGL0L12364g,	21.4	5.41	6.77	0.000654662	0.00917076	1
GO:0044003	modification by symbiont of host morphology or physiology	19	5	CAGL0F08261g,CAGL0G03289g,CAGL0G09383g,CAGL0L07722g,CAGL0M12034g,	26.3	6.64	8.84	0.00068867	0.00940994	1
GO:0051817	modification of morphology or physiology of other organism involved in symbiotic interaction	19	5	CAGL0F08261g,CAGL0G03289g,CAGL0G09383g,CAGL0L07722g,CAGL0M12034g,	26.3	6.64	8.84	0.00068867	0.00940994	1
GO:0035821	modification of morphology or physiology of other organism	19	5	CAGL0F08261g,CAGL0G03289g,CAGL0G09383g,CAGL0L07722g,CAGL0M12034g,	26.3	6.64	8.84	0.00068867	0.00940994	1
GO:0050896	response to stimulus	1251	70	CAGL0A01628g,CAGL0A04675g,CAGL0B00836g,CAGL0B00990g,CAGL0B03619g,CAGL0C01705g,CAGL0C03872g,CAGL0E00649g,CAGL0E03003g,CAGL0E04752g,CAGL0E04774g,CAGL0F01485g,CAGL0F04895g,CAGL0F06017g,CAGL0F08261g,CAGL0F08745g,CAGL0G03289g,CAGL0G03795g,CAGL0G03883g,CAGL0G04895g,CAGL0G05335g,CAGL0G08063g,CAGL0G08646g,CAGL0G09383g,CAGL0G09537g,CAGL0H02585g,CAGL0H03707g,CAGL0H03839g,CAGL0H04653g,CAGL0H05665g,CAGL0H065…	5.6	1.41	1.65	0.000709805	0.00961987	1
GO:0000302	response to reactive oxygen species	29	6	CAGL0C01705g,CAGL0F06017g,CAGL0G03883g,CAGL0J07612g,CAGL0K00803g,CAGL0K05813g,	20.7	5.22	6.48	0.000798526	0.010735	1
GO:0009123	nucleoside monophosphate metabolic process	91	11	CAGL0E06358g,CAGL0F08261g,CAGL0H05445g,CAGL0I02486g,CAGL0I07843g,CAGL0K11297g,CAGL0L02497g,CAGL0L07722g,CAGL0M07920g,CAGL0M12034g,CAGL0M13343g,	12.1	3.05	3.46	0.000850198	0.0113382	1
GO:0016126	sterol biosynthetic process	30	6	CAGL0H04653g,CAGL0I02970g,CAGL0J02684g,CAGL0L03828g,CAGL0L10714g,CAGL0L12364g,	20	5.04	6.2	0.00096563	0.0127754	1
GO:0009636	response to toxic substance	42	7	CAGL0C01705g,CAGL0F06017g,CAGL0G03289g,CAGL0G03795g,CAGL0J07612g,CAGL0K05137g,CAGL0K05813g,	16.7	4.2	4.98	0.00115043	0.0150011	1
GO:0034637	cellular carbohydrate biosynthetic process	54	8	CAGL0C05137g,CAGL0G05335g,CAGL0H02387g,CAGL0H07997g,CAGL0K03421g,CAGL0L01925g,CAGL0L12056g,CAGL0M03377g,	14.8	3.74	4.34	0.00115186	0.0150011	1
GO:0009152	purine ribonucleotide biosynthetic process	67	9	CAGL0E06358g,CAGL0F08261g,CAGL0H05445g,CAGL0I02486g,CAGL0K11297g,CAGL0L02497g,CAGL0L07722g,CAGL0M12034g,CAGL0M13343g,	13.4	3.39	3.88	0.00117835	0.0152272	1
GO:0044264	cellular polysaccharide metabolic process	55	8	CAGL0F04895g,CAGL0H07997g,CAGL0I00484g,CAGL0J02904g,CAGL0K03421g,CAGL0L01925g,CAGL0L12056g,CAGL0M03377g,	14.5	3.67	4.25	0.00130287	0.0166996	1
GO:0006164	purine nucleotide biosynthetic process	68	9	CAGL0E06358g,CAGL0F08261g,CAGL0H05445g,CAGL0I02486g,CAGL0K11297g,CAGL0L02497g,CAGL0L07722g,CAGL0M12034g,CAGL0M13343g,	13.2	3.34	3.82	0.00131233	0.0166996	1
GO:0006694	steroid biosynthetic process	32	6	CAGL0H04653g,CAGL0I02970g,CAGL0J02684g,CAGL0L03828g,CAGL0L10714g,CAGL0L12364g,	18.8	4.73	5.73	0.00137931	0.017419	1
GO:0019521	D-gluconate metabolic process	2	2	CAGL0K11297g,CAGL0M13343g,	100	25.22	inf	0.00156454	0.0186292	1
GO:0009051	pentose-phosphate shunt, oxidative branch	2	2	CAGL0J07612g,CAGL0M13343g,	100	25.22	inf	0.00156454	0.0186292	1
GO:0019520	aldonic acid metabolic process	2	2	CAGL0K11297g,CAGL0M13343g,	100	25.22	inf	0.00156454	0.0186292	1
GO:0061688	glycolytic process via Entner-Doudoroff Pathway	2	2	CAGL0K11297g,CAGL0M13343g,	100	25.22	inf	0.00156454	0.0186292	1
GO:0042989	sequestering of actin monomers	2	2	CAGL0I01078g,CAGL0K01133g,	100	25.22	inf	0.00156454	0.0186292	1
GO:0046176	aldonic acid catabolic process	2	2	CAGL0K11297g,CAGL0M13343g,	100	25.22	inf	0.00156454	0.0186292	1
GO:0045922	negative regulation of fatty acid metabolic process	2	2	CAGL0B00990g,CAGL0H05005g,	100	25.22	inf	0.00156454	0.0186292	1
GO:0046177	D-gluconate catabolic process	2	2	CAGL0K11297g,CAGL0M13343g,	100	25.22	inf	0.00156454	0.0186292	1
GO:0009165	nucleotide biosynthetic process	98	11	CAGL0D03432g,CAGL0E06358g,CAGL0F08261g,CAGL0G04213g,CAGL0H05445g,CAGL0I02486g,CAGL0K11297g,CAGL0L02497g,CAGL0L07722g,CAGL0M12034g,CAGL0M13343g,	11.2	2.83	3.18	0.00157884	0.0186501	1
GO:0009259	ribonucleotide metabolic process	113	12	CAGL0D03432g,CAGL0E06358g,CAGL0F08261g,CAGL0H05445g,CAGL0I02486g,CAGL0I07843g,CAGL0K11297g,CAGL0L02497g,CAGL0L07722g,CAGL0M07920g,CAGL0M12034g,CAGL0M13343g,	10.6	2.68	2.99	0.00158867	0.0186501	1
GO:0009260	ribonucleotide biosynthetic process	71	9	CAGL0E06358g,CAGL0F08261g,CAGL0H05445g,CAGL0I02486g,CAGL0K11297g,CAGL0L02497g,CAGL0L07722g,CAGL0M12034g,CAGL0M13343g,	12.7	3.2	3.63	0.00178954	0.0208613	1
GO:0005976	polysaccharide metabolic process	58	8	CAGL0F04895g,CAGL0H07997g,CAGL0I00484g,CAGL0J02904g,CAGL0K03421g,CAGL0L01925g,CAGL0L12056g,CAGL0M03377g,	13.8	3.48	3.99	0.00185242	0.0214443	1
GO:1901293	nucleoside phosphate biosynthetic process	101	11	CAGL0D03432g,CAGL0E06358g,CAGL0F08261g,CAGL0G04213g,CAGL0H05445g,CAGL0I02486g,CAGL0K11297g,CAGL0L02497g,CAGL0L07722g,CAGL0M12034g,CAGL0M13343g,	10.9	2.75	3.07	0.00201849	0.0232056	1
GO:0034614	cellular response to reactive oxygen species	25	5	CAGL0C01705g,CAGL0F06017g,CAGL0G03883g,CAGL0K00803g,CAGL0K05813g,	20	5.04	6.18	0.00259154	0.0295897	1
GO:0046390	ribose phosphate biosynthetic process	75	9	CAGL0E06358g,CAGL0F08261g,CAGL0H05445g,CAGL0I02486g,CAGL0K11297g,CAGL0L02497g,CAGL0L07722g,CAGL0M12034g,CAGL0M13343g,	12	3.03	3.41	0.00263195	0.0298466	1
GO:0006094	gluconeogenesis	8	3	CAGL0E06358g,CAGL0H05445g,CAGL0L07722g,	37.5	9.46	14.73	0.00296748	0.0329786	1
GO:0005978	glycogen biosynthetic process	8	3	CAGL0K03421g,CAGL0L01925g,CAGL0M03377g,	37.5	9.46	14.73	0.00296748	0.0329786	1
GO:0098869	cellular oxidant detoxification	8	3	CAGL0C01705g,CAGL0F06017g,CAGL0K05813g,	37.5	9.46	14.73	0.00296748	0.0329786	1
GO:0009150	purine ribonucleotide metabolic process	107	11	CAGL0E06358g,CAGL0F08261g,CAGL0H05445g,CAGL0I02486g,CAGL0I07843g,CAGL0K11297g,CAGL0L02497g,CAGL0L07722g,CAGL0M07920g,CAGL0M12034g,CAGL0M13343g,	10.3	2.59	2.87	0.00319694	0.0352934	1
GO:0006163	purine nucleotide metabolic process	108	11	CAGL0E06358g,CAGL0F08261g,CAGL0H05445g,CAGL0I02486g,CAGL0I07843g,CAGL0K11297g,CAGL0L02497g,CAGL0L07722g,CAGL0M07920g,CAGL0M12034g,CAGL0M13343g,	10.2	2.57	2.84	0.00343847	0.037581	1
GO:0072522	purine-containing compound biosynthetic process	78	9	CAGL0E06358g,CAGL0F08261g,CAGL0H05445g,CAGL0I02486g,CAGL0K11297g,CAGL0L02497g,CAGL0L07722g,CAGL0M12034g,CAGL0M13343g,	11.5	2.91	3.26	0.00344925	0.037581	1
GO:0044282	small molecule catabolic process	93	10	CAGL0H02585g,CAGL0H09636g,CAGL0I01100g,CAGL0I01122g,CAGL0I07843g,CAGL0J07568g,CAGL0K03421g,CAGL0K11297g,CAGL0M07920g,CAGL0M13343g,	10.8	2.71	3.01	0.00351811	0.0380824	1
GO:0075136	response to host	27	5	CAGL0F08261g,CAGL0G03289g,CAGL0G09383g,CAGL0L07722g,CAGL0M12034g,	18.5	4.67	5.62	0.00369202	0.0394526	1
GO:0052200	response to host defenses	27	5	CAGL0F08261g,CAGL0G03289g,CAGL0G09383g,CAGL0L07722g,CAGL0M12034g,	18.5	4.67	5.62	0.00369202	0.0394526	1
GO:0033554	cellular response to stress	727	43	CAGL0A04675g,CAGL0B00836g,CAGL0B00990g,CAGL0B03619g,CAGL0C01705g,CAGL0E00649g,CAGL0E04752g,CAGL0F06017g,CAGL0F08745g,CAGL0G03289g,CAGL0G03883g,CAGL0G05335g,CAGL0G08063g,CAGL0G09383g,CAGL0G09537g,CAGL0H02585g,CAGL0H03707g,CAGL0H05665g,CAGL0H08844g,CAGL0H09944g,CAGL0I00352g,CAGL0I01100g,CAGL0I01122g,CAGL0I05934g,CAGL0J04202g,CAGL0J11462g,CAGL0K00803g,CAGL0K02145g,CAGL0K05137g,CAGL0K05731g,CAGL0K058…	5.9	1.49	1.66	0.00377649	0.0400981	1
GO:0051701	interaction with host	39	6	CAGL0E06358g,CAGL0F08261g,CAGL0G03289g,CAGL0G09383g,CAGL0L07722g,CAGL0M12034g,	15.4	3.88	4.5	0.00394204	0.041591	1
GO:0009395	phospholipid catabolic process	9	3	CAGL0E05654g,CAGL0J11748g,CAGL0J11770g,	33.3	8.41	12.27	0.00432192	0.0447493	1
GO:0046364	monosaccharide biosynthetic process	9	3	CAGL0E06358g,CAGL0H05445g,CAGL0L07722g,	33.3	8.41	12.27	0.00432192	0.0447493	1
GO:0019319	hexose biosynthetic process	9	3	CAGL0E06358g,CAGL0H05445g,CAGL0L07722g,	33.3	8.41	12.27	0.00432192	0.0447493	1
GO:0015680	protein maturation by copper ion transfer	3	2	CAGL0F06017g,CAGL0I02508g,	66.7	16.82	48.9	0.00457071	0.0453534	1
GO:0018958	phenol-containing compound metabolic process	3	2	CAGL0H09636g,CAGL0K05731g,	66.7	16.82	48.9	0.00457071	0.0453534	1
GO:0015677	copper ion import	3	2	CAGL0D04708g,CAGL0I02508g,	66.7	16.82	48.9	0.00457071	0.0453534	1
GO:0035719	tRNA import into nucleus	3	2	CAGL0G03795g,CAGL0H03707g,	66.7	16.82	48.9	0.00457071	0.0453534	1
GO:0070843	misfolded protein transport	3	2	CAGL0H03707g,CAGL0M05379g,	66.7	16.82	48.9	0.00457071	0.0453534	1
GO:0035434	copper ion transmembrane transport	3	2	CAGL0D04708g,CAGL0I02508g,	66.7	16.82	48.9	0.00457071	0.0453534	1
GO:0006011	UDP-glucose metabolic process	3	2	CAGL0K03421g,CAGL0L01925g,	66.7	16.82	48.9	0.00457071	0.0453534	1
GO:0052173	response to defenses of other organism involved in symbiotic interaction	30	5	CAGL0F08261g,CAGL0G03289g,CAGL0G09383g,CAGL0L07722g,CAGL0M12034g,	16.7	4.2	4.94	0.0059181	0.0576929	1
GO:0043207	response to external biotic stimulus	30	5	CAGL0F08261g,CAGL0G03289g,CAGL0G09383g,CAGL0L07722g,CAGL0M12034g,	16.7	4.2	4.94	0.0059181	0.0576929	1
GO:0051707	response to other organism	30	5	CAGL0F08261g,CAGL0G03289g,CAGL0G09383g,CAGL0L07722g,CAGL0M12034g,	16.7	4.2	4.94	0.0059181	0.0576929	1
GO:0015980	energy derivation by oxidation of organic compounds	102	10	CAGL0F04895g,CAGL0I06831g,CAGL0I07843g,CAGL0J02904g,CAGL0K03421g,CAGL0L01925g,CAGL0L06732g,CAGL0L12056g,CAGL0M03377g,CAGL0M07920g,	9.8	2.47	2.71	0.00680954	0.0658459	1
GO:0045454	cell redox homeostasis	31	5	CAGL0C01705g,CAGL0H05665g,CAGL0K00803g,CAGL0K05813g,CAGL0M11704g,	16.1	4.07	4.75	0.00683343	0.0658459	1
GO:0044275	cellular carbohydrate catabolic process	20	4	CAGL0F04895g,CAGL0K05137g,CAGL0K11297g,CAGL0M13343g,	20	5.04	6.15	0.00705237	0.0671789	1
GO:0045833	negative regulation of lipid metabolic process	20	4	CAGL0B00990g,CAGL0H05005g,CAGL0K07458g,CAGL0L07480g,	20	5.04	6.15	0.00705237	0.0671789	1
GO:1903008	organelle disassembly	44	6	CAGL0A04675g,CAGL0B04675g,CAGL0C03245g,CAGL0E00649g,CAGL0G03883g,CAGL0H06545g,	13.6	3.44	3.91	0.00723748	0.0685504	1
GO:0072521	purine-containing compound metabolic process	122	11	CAGL0E06358g,CAGL0F08261g,CAGL0H05445g,CAGL0I02486g,CAGL0I07843g,CAGL0K11297g,CAGL0L02497g,CAGL0L07722g,CAGL0M07920g,CAGL0M12034g,CAGL0M13343g,	9	2.27	2.48	0.00862679	0.0785236	1
GO:0010035	response to inorganic substance	90	9	CAGL0C01705g,CAGL0F06017g,CAGL0F08745g,CAGL0I05934g,CAGL0J07612g,CAGL0J11462g,CAGL0K05137g,CAGL0K05813g,CAGL0M11704g,	10	2.52	2.77	0.00887562	0.0785236	1
GO:0070534	protein K63-linked ubiquitination	4	2	CAGL0G08063g,CAGL0I00352g,	50	12.61	24.45	0.0089028	0.0785236	1
GO:0071465	cellular response to desiccation	4	2	CAGL0F08745g,CAGL0K05137g,	50	12.61	24.45	0.0089028	0.0785236	1
GO:0071311	cellular response to acetate	4	2	CAGL0K02145g,CAGL0K07458g,	50	12.61	24.45	0.0089028	0.0785236	1
GO:0019568	arabinose catabolic process	4	2	CAGL0I01100g,CAGL0I01122g,	50	12.61	24.45	0.0089028	0.0785236	1
GO:0070413	trehalose metabolism in response to stress	4	2	CAGL0G03883g,CAGL0G05335g,	50	12.61	24.45	0.0089028	0.0785236	1
GO:0009186	deoxyribonucleoside diphosphate metabolic process	4	2	CAGL0D03432g,CAGL0G04213g,	50	12.61	24.45	0.0089028	0.0785236	1
GO:0042732	D-xylose metabolic process	4	2	CAGL0I01100g,CAGL0I01122g,	50	12.61	24.45	0.0089028	0.0785236	1
GO:0019655	glycolytic fermentation to ethanol	4	2	CAGL0I07843g,CAGL0M07920g,	50	12.61	24.45	0.0089028	0.0785236	1
GO:0009269	response to desiccation	4	2	CAGL0F08745g,CAGL0K05137g,	50	12.61	24.45	0.0089028	0.0785236	1
GO:0019566	arabinose metabolic process	4	2	CAGL0I01100g,CAGL0I01122g,	50	12.61	24.45	0.0089028	0.0785236	1
GO:0042843	D-xylose catabolic process	4	2	CAGL0I01100g,CAGL0I01122g,	50	12.61	24.45	0.0089028	0.0785236	1
GO:0044419	interspecies interaction between organisms	211	16	CAGL0E06358g,CAGL0F08261g,CAGL0G03289g,CAGL0G03883g,CAGL0G05335g,CAGL0G09383g,CAGL0H05665g,CAGL0I00484g,CAGL0I02970g,CAGL0K05137g,CAGL0K05813g,CAGL0K11858g,CAGL0L03091g,CAGL0L07480g,CAGL0L07722g,CAGL0M12034g,	7.6	1.91	2.07	0.00908383	0.0796987	1
GO:0071236	cellular response to antibiotic	22	4	CAGL0C01705g,CAGL0K02145g,CAGL0K05137g,CAGL0K07458g,	18.2	4.59	5.47	0.0100084	0.0873506	1
GO:0006826	iron ion transport	12	3	CAGL0A03476g,CAGL0D04708g,CAGL0L05742g,	25	6.31	8.18	0.0103649	0.0890636	1
GO:0046365	monosaccharide catabolic process	12	3	CAGL0I01100g,CAGL0I01122g,CAGL0K03421g,	25	6.31	8.18	0.0103649	0.0890636	1
GO:0006616	SRP-dependent cotranslational protein targeting to membrane, translocation	12	3	CAGL0G03289g,CAGL0G03795g,CAGL0I05098g,	25	6.31	8.18	0.0103649	0.0890636	1
GO:0016054	organic acid catabolic process	63	7	CAGL0H02585g,CAGL0H09636g,CAGL0I07843g,CAGL0J07568g,CAGL0K11297g,CAGL0M07920g,CAGL0M13343g,	11.1	2.8	3.1	0.0116973	0.0994871	1
GO:0046395	carboxylic acid catabolic process	63	7	CAGL0H02585g,CAGL0H09636g,CAGL0I07843g,CAGL0J07568g,CAGL0K11297g,CAGL0M07920g,CAGL0M13343g,	11.1	2.8	3.1	0.0116973	0.0994871	1
GO:1901137	carbohydrate derivative biosynthetic process	218	16	CAGL0B04675g,CAGL0D03432g,CAGL0E06358g,CAGL0F08261g,CAGL0G04213g,CAGL0H05445g,CAGL0I02486g,CAGL0I04774g,CAGL0K11297g,CAGL0L01925g,CAGL0L02497g,CAGL0L07722g,CAGL0L12056g,CAGL0M07381g,CAGL0M12034g,CAGL0M13343g,	7.3	1.85	1.99	0.0122151	0.103364	1
GO:1990748	cellular detoxification	13	3	CAGL0C01705g,CAGL0F06017g,CAGL0K05813g,	23.1	5.82	7.36	0.0130861	0.109073	1
GO:0032889	regulation of vacuole fusion, non-autophagic	13	3	CAGL0E00649g,CAGL0F08261g,CAGL0I02486g,	23.1	5.82	7.36	0.0130861	0.109073	1
GO:0042026	protein refolding	13	3	CAGL0G03883g,CAGL0H08283g,CAGL0J04224g,	23.1	5.82	7.36	0.0130861	0.109073	1
GO:0042737	drug catabolic process	24	4	CAGL0C01705g,CAGL0H09636g,CAGL0K00803g,CAGL0M07920g,	16.7	4.2	4.92	0.0136679	0.109506	1
GO:0000305	response to oxygen radical	5	2	CAGL0F06017g,CAGL0K05813g,	40	10.09	16.29	0.0144519	0.109506	1
GO:0019660	glycolytic fermentation	5	2	CAGL0I07843g,CAGL0M07920g,	40	10.09	16.29	0.0144519	0.109506	1
GO:0019666	nitrogenous compound fermentation	5	2	CAGL0I07843g,CAGL0M07920g,	40	10.09	16.29	0.0144519	0.109506	1
GO:0019388	galactose catabolic process	5	2	CAGL0I01122g,CAGL0K03421g,	40	10.09	16.29	0.0144519	0.109506	1
GO:0071451	cellular response to superoxide	5	2	CAGL0F06017g,CAGL0K05813g,	40	10.09	16.29	0.0144519	0.109506	1
GO:0042743	hydrogen peroxide metabolic process	5	2	CAGL0C01705g,CAGL0K00803g,	40	10.09	16.29	0.0144519	0.109506	1
GO:0019323	pentose catabolic process	5	2	CAGL0I01100g,CAGL0I01122g,	40	10.09	16.29	0.0144519	0.109506	1
GO:0071450	cellular response to oxygen radical	5	2	CAGL0F06017g,CAGL0K05813g,	40	10.09	16.29	0.0144519	0.109506	1
GO:0120174	stress-induced homeostatically regulated protein degradation pathway	5	2	CAGL0I00352g,CAGL0I05934g,	40	10.09	16.29	0.0144519	0.109506	1
GO:0006404	RNA import into nucleus	5	2	CAGL0G03795g,CAGL0H03707g,	40	10.09	16.29	0.0144519	0.109506	1
GO:0019430	removal of superoxide radicals	5	2	CAGL0F06017g,CAGL0K05813g,	40	10.09	16.29	0.0144519	0.109506	1
GO:0000947	amino acid catabolic process to alcohol via Ehrlich pathway	5	2	CAGL0I07843g,CAGL0M07920g,	40	10.09	16.29	0.0144519	0.109506	1
GO:0034553	mitochondrial respiratory chain complex II assembly	5	2	CAGL0A03080g,CAGL0I09394g,	40	10.09	16.29	0.0144519	0.109506	1
GO:0010034	response to acetate	5	2	CAGL0K02145g,CAGL0K07458g,	40	10.09	16.29	0.0144519	0.109506	1
GO:0034552	respiratory chain complex II assembly	5	2	CAGL0A03080g,CAGL0I09394g,	40	10.09	16.29	0.0144519	0.109506	1
GO:0042744	hydrogen peroxide catabolic process	5	2	CAGL0C01705g,CAGL0K00803g,	40	10.09	16.29	0.0144519	0.109506	1
GO:0000303	response to superoxide	5	2	CAGL0F06017g,CAGL0K05813g,	40	10.09	16.29	0.0144519	0.109506	1
GO:0000955	amino acid catabolic process via Ehrlich pathway	5	2	CAGL0I07843g,CAGL0M07920g,	40	10.09	16.29	0.0144519	0.109506	1
GO:0007039	protein catabolic process in the vacuole	5	2	CAGL0B03619g,CAGL0G07623g,	40	10.09	16.29	0.0144519	0.109506	1
GO:0044403	symbiont process	82	8	CAGL0E06358g,CAGL0F08261g,CAGL0G03289g,CAGL0G09383g,CAGL0I00484g,CAGL0L07480g,CAGL0L07722g,CAGL0M12034g,	9.8	2.46	2.68	0.015326	0.115604	1
GO:0009250	glucan biosynthetic process	26	4	CAGL0H07997g,CAGL0K03421g,CAGL0L01925g,CAGL0M03377g,	15.4	3.88	4.47	0.0180815	0.135774	1
GO:0097237	cellular response to toxic substance	27	4	CAGL0C01705g,CAGL0F06017g,CAGL0K05137g,CAGL0K05813g,	14.8	3.74	4.28	0.0205841	0.153873	1
GO:0009263	deoxyribonucleotide biosynthetic process	6	2	CAGL0D03432g,CAGL0G04213g,	33.3	8.41	12.22	0.0211157	0.155752	1
GO:0006012	galactose metabolic process	6	2	CAGL0I01122g,CAGL0K03421g,	33.3	8.41	12.22	0.0211157	0.155752	1
GO:0051341	regulation of oxidoreductase activity	6	2	CAGL0E00649g,CAGL0K06699g,	33.3	8.41	12.22	0.0211157	0.155752	1
GO:0009266	response to temperature stimulus	105	9	CAGL0E04752g,CAGL0F04895g,CAGL0G03289g,CAGL0G03883g,CAGL0G05335g,CAGL0J04202g,CAGL0J04224g,CAGL0K05137g,CAGL0K05731g,	8.6	2.16	2.33	0.0227226	0.166866	1
GO:0031589	cell-substrate adhesion	28	4	CAGL0E05654g,CAGL0G09383g,CAGL0I00484g,CAGL0L07480g,	14.3	3.6	4.1	0.0232893	0.170177	1
GO:0006613	cotranslational protein targeting to membrane	16	3	CAGL0G03289g,CAGL0G03795g,CAGL0I05098g,	18.8	4.73	5.66	0.0234797	0.170177	1
GO:0006614	SRP-dependent cotranslational protein targeting to membrane	16	3	CAGL0G03289g,CAGL0G03795g,CAGL0I05098g,	18.8	4.73	5.66	0.0234797	0.170177	1
GO:0007155	cell adhesion	42	5	CAGL0E05654g,CAGL0G09383g,CAGL0I00484g,CAGL0J04202g,CAGL0L07480g,	11.9	3	3.33	0.024093	0.173866	1
GO:0061726	mitochondrion disassembly	29	4	CAGL0A04675g,CAGL0C03245g,CAGL0E00649g,CAGL0H06545g,	13.8	3.48	3.93	0.0262008	0.186653	1
GO:0000041	transition metal ion transport	29	4	CAGL0A03476g,CAGL0D04708g,CAGL0I02508g,CAGL0L05742g,	13.8	3.48	3.93	0.0262008	0.186653	1
GO:0000422	autophagy of mitochondrion	29	4	CAGL0A04675g,CAGL0C03245g,CAGL0E00649g,CAGL0H06545g,	13.8	3.48	3.93	0.0262008	0.186653	1
GO:0098754	detoxification	17	3	CAGL0C01705g,CAGL0F06017g,CAGL0K05813g,	17.6	4.45	5.25	0.0276962	0.196466	1
GO:0009408	response to heat	92	8	CAGL0E04752g,CAGL0F04895g,CAGL0G03289g,CAGL0G03883g,CAGL0G05335g,CAGL0J04202g,CAGL0J04224g,CAGL0K05731g,	8.7	2.19	2.36	0.0286501	0.200538	1
GO:0006116	NADH oxidation	7	2	CAGL0C05137g,CAGL0I07843g,	28.6	7.21	9.77	0.0287979	0.200538	1
GO:0009262	deoxyribonucleotide metabolic process	7	2	CAGL0D03432g,CAGL0G04213g,	28.6	7.21	9.77	0.0287979	0.200538	1
GO:0019321	pentose metabolic process	7	2	CAGL0I01100g,CAGL0I01122g,	28.6	7.21	9.77	0.0287979	0.200538	1
GO:0033692	cellular polysaccharide biosynthetic process	44	5	CAGL0H07997g,CAGL0K03421g,CAGL0L01925g,CAGL0L12056g,CAGL0M03377g,	11.4	2.87	3.16	0.0288717	0.200538	1
GO:0019752	carboxylic acid metabolic process	324	20	CAGL0E06358g,CAGL0F08261g,CAGL0G03905g,CAGL0H02585g,CAGL0H05445g,CAGL0H06523g,CAGL0H09636g,CAGL0I02486g,CAGL0I07843g,CAGL0J06050g,CAGL0J07568g,CAGL0K00803g,CAGL0K10296g,CAGL0K11297g,CAGL0L02497g,CAGL0L07722g,CAGL0M07920g,CAGL0M08624g,CAGL0M12034g,CAGL0M13343g,	6.2	1.56	1.66	0.0309626	0.214169	1
GO:0000271	polysaccharide biosynthetic process	45	5	CAGL0H07997g,CAGL0K03421g,CAGL0L01925g,CAGL0L12056g,CAGL0M03377g,	11.1	2.8	3.08	0.0314704	0.216782	1
GO:0062014	negative regulation of small molecule metabolic process	18	3	CAGL0B00990g,CAGL0H05005g,CAGL0J09262g,	16.7	4.2	4.9	0.0322875	0.219705	1
GO:0006793	phosphorus metabolic process	518	29	CAGL0B03069g,CAGL0B04587g,CAGL0C05137g,CAGL0D01298g,CAGL0D03432g,CAGL0E00649g,CAGL0E05654g,CAGL0E06358g,CAGL0F08261g,CAGL0G04213g,CAGL0H05005g,CAGL0H05445g,CAGL0I02200g,CAGL0I02486g,CAGL0I07843g,CAGL0J02904g,CAGL0J07612g,CAGL0J11748g,CAGL0J11770g,CAGL0K03421g,CAGL0K07458g,CAGL0K11297g,CAGL0L01925g,CAGL0L02497g,CAGL0L05478g,CAGL0L07722g,CAGL0M07920g,CAGL0M12034g,CAGL0M13343g,	5.6	1.41	1.51	0.033967	0.219705	1
GO:0016053	organic acid biosynthetic process	169	12	CAGL0E06358g,CAGL0F08261g,CAGL0G03905g,CAGL0H05445g,CAGL0H06523g,CAGL0I02486g,CAGL0K00803g,CAGL0K11297g,CAGL0L02497g,CAGL0L07722g,CAGL0M12034g,CAGL0M13343g,	7.1	1.79	1.9	0.0352188	0.219705	1
GO:0046394	carboxylic acid biosynthetic process	169	12	CAGL0E06358g,CAGL0F08261g,CAGL0G03905g,CAGL0H05445g,CAGL0H06523g,CAGL0I02486g,CAGL0K00803g,CAGL0K11297g,CAGL0L02497g,CAGL0L07722g,CAGL0M12034g,CAGL0M13343g,	7.1	1.79	1.9	0.0352188	0.219705	1
GO:0009063	cellular amino acid catabolic process	32	4	CAGL0H02585g,CAGL0I07843g,CAGL0J07568g,CAGL0M07920g,	12.5	3.15	3.51	0.0361969	0.219705	1
GO:0019439	aromatic compound catabolic process	170	12	CAGL0B04675g,CAGL0E06358g,CAGL0F08261g,CAGL0H05445g,CAGL0H09636g,CAGL0I02486g,CAGL0K11297g,CAGL0L02497g,CAGL0L07722g,CAGL0M07920g,CAGL0M12034g,CAGL0M13343g,	7.1	1.78	1.89	0.0366159	0.219705	1
GO:0000209	protein polyubiquitination	19	3	CAGL0E04752g,CAGL0G08063g,CAGL0I00352g,	15.8	3.98	4.59	0.0372503	0.219705	1
GO:0051788	response to misfolded protein	19	3	CAGL0G03883g,CAGL0H03707g,CAGL0I00352g,	15.8	3.98	4.59	0.0372503	0.219705	1
GO:0071218	cellular response to misfolded protein	19	3	CAGL0G03883g,CAGL0H03707g,CAGL0I00352g,	15.8	3.98	4.59	0.0372503	0.219705	1
GO:0009225	nucleotide-sugar metabolic process	8	2	CAGL0K03421g,CAGL0L01925g,	25	6.31	8.14	0.037408	0.219705	1
GO:0019217	regulation of fatty acid metabolic process	8	2	CAGL0B00990g,CAGL0H05005g,	25	6.31	8.14	0.037408	0.219705	1
GO:0019320	hexose catabolic process	8	2	CAGL0I01122g,CAGL0K03421g,	25	6.31	8.14	0.037408	0.219705	1
GO:0006801	superoxide metabolic process	8	2	CAGL0F06017g,CAGL0K05813g,	25	6.31	8.14	0.037408	0.219705	1
GO:0006113	fermentation	8	2	CAGL0I07843g,CAGL0M07920g,	25	6.31	8.14	0.037408	0.219705	1
GO:0034755	iron ion transmembrane transport	8	2	CAGL0D04708g,CAGL0L05742g,	25	6.31	8.14	0.037408	0.219705	1
GO:0006067	ethanol metabolic process	8	2	CAGL0I07843g,CAGL0M07920g,	25	6.31	8.14	0.037408	0.219705	1
GO:0030001	metal ion transport	63	6	CAGL0A03476g,CAGL0D04708g,CAGL0D06578g,CAGL0F06017g,CAGL0I02508g,CAGL0L05742g,	9.5	2.4	2.6	0.037556	0.219705	1
GO:1901098	positive regulation of autophagosome maturation	1	1	CAGL0E00649g,	100	25.22	inf	0.0396451	0.219705	1
GO:0006578	amino-acid betaine biosynthetic process	1	1	CAGL0K08844g,	100	25.22	inf	0.0396451	0.219705	1
GO:0051572	negative regulation of histone H3-K4 methylation	1	1	CAGL0K05731g,	100	25.22	inf	0.0396451	0.219705	1
GO:1900561	dehydroaustinol metabolic process	1	1	CAGL0K05731g,	100	25.22	inf	0.0396451	0.219705	1
GO:0051573	negative regulation of histone H3-K9 methylation	1	1	CAGL0K05731g,	100	25.22	inf	0.0396451	0.219705	1
GO:2001216	negative regulation of hydroxymethylglutaryl-CoA reductase (NADPH) activity	1	1	CAGL0K06699g,	100	25.22	inf	0.0396451	0.219705	1
GO:1901096	regulation of autophagosome maturation	1	1	CAGL0E00649g,	100	25.22	inf	0.0396451	0.219705	1
GO:0080058	protein deglutathionylation	1	1	CAGL0K00803g,	100	25.22	inf	0.0396451	0.219705	1
GO:0070842	aggresome assembly	1	1	CAGL0L12056g,	100	25.22	inf	0.0396451	0.219705	1
GO:0001321	age-dependent general metabolic decline involved in replicative cell aging	1	1	CAGL0G03883g,	100	25.22	inf	0.0396451	0.219705	1
GO:0009712	catechol-containing compound metabolic process	1	1	CAGL0H09636g,	100	25.22	inf	0.0396451	0.219705	1
GO:1900558	austinol metabolic process	1	1	CAGL0K05731g,	100	25.22	inf	0.0396451	0.219705	1
GO:1901426	response to furfural	1	1	CAGL0K09702g,	100	25.22	inf	0.0396451	0.219705	1
GO:1900560	austinol biosynthetic process	1	1	CAGL0K05731g,	100	25.22	inf	0.0396451	0.219705	1
GO:1900563	dehydroaustinol biosynthetic process	1	1	CAGL0K05731g,	100	25.22	inf	0.0396451	0.219705	1
GO:0001319	inheritance of oxidatively modified proteins involved in replicative cell aging	1	1	CAGL0G03883g,	100	25.22	inf	0.0396451	0.219705	1
GO:0015805	S-adenosyl-L-methionine transport	1	1	CAGL0H03839g,	100	25.22	inf	0.0396451	0.219705	1
GO:0051084	'de novo' posttranslational protein folding	1	1	CAGL0G03883g,	100	25.22	inf	0.0396451	0.219705	1
GO:0046278	3,4-dihydroxybenzoate metabolic process	1	1	CAGL0H09636g,	100	25.22	inf	0.0396451	0.219705	1
GO:0070841	inclusion body assembly	1	1	CAGL0L12056g,	100	25.22	inf	0.0396451	0.219705	1
GO:0036151	phosphatidylcholine acyl-chain remodeling	1	1	CAGL0J11770g,	100	25.22	inf	0.0396451	0.219705	1
GO:0034478	phosphatidylglycerol catabolic process	1	1	CAGL0E05654g,	100	25.22	inf	0.0396451	0.219705	1
GO:0043418	homocysteine catabolic process	1	1	CAGL0J07568g,	100	25.22	inf	0.0396451	0.219705	1
GO:0051806	entry into cell of other organism involved in symbiotic interaction	1	1	CAGL0G03289g,	100	25.22	inf	0.0396451	0.219705	1
GO:0001316	age-dependent response to reactive oxygen species involved in replicative cell aging	1	1	CAGL0G03883g,	100	25.22	inf	0.0396451	0.219705	1
GO:0070183	mitochondrial tryptophanyl-tRNA aminoacylation	1	1	CAGL0M08624g,	100	25.22	inf	0.0396451	0.219705	1
GO:0070994	detection of oxidative stress	1	1	CAGL0G09383g,	100	25.22	inf	0.0396451	0.219705	1
GO:0035617	stress granule disassembly	1	1	CAGL0G03883g,	100	25.22	inf	0.0396451	0.219705	1
GO:1903614	negative regulation of protein tyrosine phosphatase activity	1	1	CAGL0J04202g,	100	25.22	inf	0.0396451	0.219705	1
GO:0019614	catechol-containing compound catabolic process	1	1	CAGL0H09636g,	100	25.22	inf	0.0396451	0.219705	1
GO:0031638	zymogen activation	1	1	CAGL0M13651g,	100	25.22	inf	0.0396451	0.219705	1
GO:0045717	negative regulation of fatty acid biosynthetic process	1	1	CAGL0H05005g,	100	25.22	inf	0.0396451	0.219705	1
GO:0001317	accumulation of oxidatively modified proteins involved in replicative cell aging	1	1	CAGL0G03883g,	100	25.22	inf	0.0396451	0.219705	1
GO:0019619	3,4-dihydroxybenzoate catabolic process	1	1	CAGL0H09636g,	100	25.22	inf	0.0396451	0.219705	1
GO:0001322	age-dependent response to oxidative stress involved in replicative cell aging	1	1	CAGL0G03883g,	100	25.22	inf	0.0396451	0.219705	1
GO:0051085	chaperone cofactor-dependent protein refolding	1	1	CAGL0G03883g,	100	25.22	inf	0.0396451	0.219705	1
GO:0045329	carnitine biosynthetic process	1	1	CAGL0K08844g,	100	25.22	inf	0.0396451	0.219705	1
GO:0030260	entry into host cell	1	1	CAGL0G03289g,	100	25.22	inf	0.0396451	0.219705	1
GO:1903613	regulation of protein tyrosine phosphatase activity	1	1	CAGL0J04202g,	100	25.22	inf	0.0396451	0.219705	1
GO:0019336	phenol-containing compound catabolic process	1	1	CAGL0H09636g,	100	25.22	inf	0.0396451	0.219705	1
GO:0010731	protein glutathionylation	1	1	CAGL0H05665g,	100	25.22	inf	0.0396451	0.219705	1
GO:0006457	protein folding	98	8	CAGL0E01177g,CAGL0G03289g,CAGL0G03795g,CAGL0G03883g,CAGL0H01705g,CAGL0H03707g,CAGL0H08283g,CAGL0J04224g,	8.2	2.06	2.2	0.0396708	0.219705	1
GO:0043436	oxoacid metabolic process	334	20	CAGL0E06358g,CAGL0F08261g,CAGL0G03905g,CAGL0H02585g,CAGL0H05445g,CAGL0H06523g,CAGL0H09636g,CAGL0I02486g,CAGL0I07843g,CAGL0J06050g,CAGL0J07568g,CAGL0K00803g,CAGL0K10296g,CAGL0K11297g,CAGL0L02497g,CAGL0L07722g,CAGL0M07920g,CAGL0M08624g,CAGL0M12034g,CAGL0M13343g,	6	1.51	1.6	0.040757	0.224973	1
GO:0006082	organic acid metabolic process	335	20	CAGL0E06358g,CAGL0F08261g,CAGL0G03905g,CAGL0H02585g,CAGL0H05445g,CAGL0H06523g,CAGL0H09636g,CAGL0I02486g,CAGL0I07843g,CAGL0J06050g,CAGL0J07568g,CAGL0K00803g,CAGL0K10296g,CAGL0K11297g,CAGL0L02497g,CAGL0L07722g,CAGL0M07920g,CAGL0M08624g,CAGL0M12034g,CAGL0M13343g,	6	1.51	1.59	0.041849	0.230165	1
GO:0006796	phosphate-containing compound metabolic process	506	28	CAGL0B03069g,CAGL0B04587g,CAGL0C05137g,CAGL0D01298g,CAGL0D03432g,CAGL0E00649g,CAGL0E05654g,CAGL0E06358g,CAGL0F08261g,CAGL0G04213g,CAGL0H05005g,CAGL0H05445g,CAGL0I02200g,CAGL0I02486g,CAGL0I07843g,CAGL0J02904g,CAGL0J07612g,CAGL0J11748g,CAGL0J11770g,CAGL0K03421g,CAGL0K07458g,CAGL0K11297g,CAGL0L02497g,CAGL0L05478g,CAGL0L07722g,CAGL0M07920g,CAGL0M12034g,CAGL0M13343g,	5.5	1.4	1.48	0.0419736	0.230165	1
GO:1901361	organic cyclic compound catabolic process	174	12	CAGL0B04675g,CAGL0E06358g,CAGL0F08261g,CAGL0H05445g,CAGL0H09636g,CAGL0I02486g,CAGL0K11297g,CAGL0L02497g,CAGL0L07722g,CAGL0M07920g,CAGL0M12034g,CAGL0M13343g,	6.9	1.74	1.84	0.0425987	0.232826	1
GO:0080134	regulation of response to stress	118	9	CAGL0A01628g,CAGL0F08261g,CAGL0G03289g,CAGL0G09383g,CAGL0I00352g,CAGL0K00803g,CAGL0L07480g,CAGL0L07722g,CAGL0M12034g,	7.6	1.92	2.04	0.0436597	0.237588	1
GO:0010033	response to organic substance	214	14	CAGL0A04675g,CAGL0G03883g,CAGL0G08646g,CAGL0H03707g,CAGL0H05665g,CAGL0I00352g,CAGL0I05934g,CAGL0K02145g,CAGL0K05137g,CAGL0K07458g,CAGL0K09702g,CAGL0L07480g,CAGL0M02937g,CAGL0M05379g,	6.5	1.65	1.75	0.0437549	0.237588	1
GO:0009605	response to external stimulus	275	17	CAGL0A01628g,CAGL0B03619g,CAGL0F08261g,CAGL0F08745g,CAGL0G03289g,CAGL0G05335g,CAGL0G09383g,CAGL0H08844g,CAGL0I05934g,CAGL0J11462g,CAGL0K05137g,CAGL0K06699g,CAGL0K10296g,CAGL0L03091g,CAGL0L07480g,CAGL0L07722g,CAGL0M12034g,	6.2	1.56	1.65	0.0443056	0.239797	1
GO:0022411	cellular component disassembly	101	8	CAGL0A04675g,CAGL0B04675g,CAGL0C03245g,CAGL0E00649g,CAGL0G03883g,CAGL0H06545g,CAGL0I00484g,CAGL0K01133g,	7.9	2	2.13	0.0461196	0.245653	1
GO:0051716	cellular response to stimulus	1101	54	CAGL0A01628g,CAGL0A04675g,CAGL0B00836g,CAGL0B00990g,CAGL0B03619g,CAGL0C01705g,CAGL0E00649g,CAGL0E03003g,CAGL0E04752g,CAGL0F06017g,CAGL0F08745g,CAGL0G03289g,CAGL0G03883g,CAGL0G04895g,CAGL0G05335g,CAGL0G08063g,CAGL0G08646g,CAGL0G09383g,CAGL0G09537g,CAGL0H02585g,CAGL0H03707g,CAGL0H04653g,CAGL0H05665g,CAGL0H06545g,CAGL0H08844g,CAGL0H09944g,CAGL0I00352g,CAGL0I01100g,CAGL0I01122g,CAGL0I02970g,CAGL0I059…	4.9	1.24	1.34	0.0461806	0.245653	1
GO:0006458	'de novo' protein folding	9	2	CAGL0G03883g,CAGL0J04224g,	22.2	5.61	6.98	0.0468612	0.245653	1
GO:0006077	(1->6)-beta-D-glucan metabolic process	9	2	CAGL0H07997g,CAGL0L01925g,	22.2	5.61	6.98	0.0468612	0.245653	1
GO:0006825	copper ion transport	9	2	CAGL0D04708g,CAGL0I02508g,	22.2	5.61	6.98	0.0468612	0.245653	1
GO:0008154	actin polymerization or depolymerization	9	2	CAGL0I01078g,CAGL0K01133g,	22.2	5.61	6.98	0.0468612	0.245653	1
GO:0070941	eisosome assembly	9	2	CAGL0I10494g,CAGL0K07458g,	22.2	5.61	6.98	0.0468612	0.245653	1
GO:0051569	regulation of histone H3-K4 methylation	9	2	CAGL0I00352g,CAGL0K05731g,	22.2	5.61	6.98	0.0468612	0.245653	1
GO:0032988	ribonucleoprotein complex disassembly	9	2	CAGL0B04675g,CAGL0G03883g,	22.2	5.61	6.98	0.0468612	0.245653	1
GO:0006078	(1->6)-beta-D-glucan biosynthetic process	9	2	CAGL0H07997g,CAGL0L01925g,	22.2	5.61	6.98	0.0468612	0.245653	1
GO:0035690	cellular response to drug	237	15	CAGL0A01628g,CAGL0C01705g,CAGL0E03003g,CAGL0G04895g,CAGL0H04653g,CAGL0H05665g,CAGL0I01100g,CAGL0I02970g,CAGL0I10384g,CAGL0K02145g,CAGL0K05137g,CAGL0K10296g,CAGL0L07480g,CAGL0L10714g,CAGL0M08552g,	6.3	1.6	1.69	0.0480363	0.250664	1
GO:0051031	tRNA transport	21	3	CAGL0G03795g,CAGL0H03707g,CAGL0K07832g,	14.3	3.6	4.08	0.0482682	0.250664	1
GO:0051273	beta-glucan metabolic process	21	3	CAGL0H07997g,CAGL0I00484g,CAGL0L01925g,	14.3	3.6	4.08	0.0482682	0.250664	1

## Sheet: Group 5
Supplementary file 2: List of GO-terms enriched from temporally induced genes in wildtype C. glabrata in response to macrophage infection
	GO-Term enrichment employing Candida genome database
GOID	GO_term	Corrected P-value	Cluster frequency	Background frequency	False discovery rate	Gene(s) annotated to the term	Directly Annotated GOID List
55072	iron ion homeostasis	0.00181	8 out of 148 genes, 5.4%	36 out of 5615 background genes, 0.6%	0	HMX1:CTH2:FET3:AFT1:FTR1:CAGL0J07980g:HAP5:CAGL0L11990g	55114:31065:122:34755:30036:46688:7059:42167:6979:45944:33215:2000678:45132:36086:436:1901684:34087:6788:43457:45454:34758:956:34759:6879:32048:9405:1990641:6878:6825:34599
34755	iron ion transmembrane transport	0.00884	4 out of 148 genes, 2.7%	7 out of 5615 background genes, 0.1%	0.008	SIT1:FET3:FTR1:FTH1	33215:15891:55114:34755:46688:44718:1901684
34756	regulation of iron ion transport	0.01041	3 out of 148 genes, 2.0%	3 out of 5615 background genes, 0.1%	0.0057	AFT1:CAGL0J07980g:SNF2	6261:31496:7059:45944:42148:36086:1900400:34759:32048:6338:1900231:34599:42766:6302:122:6979:45132:34087:43044:6357:2000219:34758:1900189:6879:9405:1990641:6878:6825:61412:35973
50801	ion homeostasis	0.01718	13 out of 148 genes, 8.8%	129 out of 5615 background genes, 2.3%	0.0055	PMA1:HMX1:CTH2:FET3:PFK1:AFT1:FTR1:CAGL0J07980g:CAGL0K07392g:HAP5:CNB1:PFK2:CAGL0L11990g	6096:44117:30036:6402:34976:7059:42167:45944:33215:1902600:2000678:36086:1904263:6002:6788:55085:43457:45454:34759:6882:32048:6754:6812:30388:34599:55114:31065:70370:122:70072:7035:55074:34755:46688:6979:45132:436:1901684:34087:31505:1902906:34758:956:51453:6879:35690:9405:1990641:120029:6878:6825
45944	positive regulation of transcription by RNA polymerase II	0.05872	18 out of 148 genes, 12.2%	253 out of 5615 background genes, 4.5%	0.0071	CAGL0B03421g:CAGL0E03762g:CAGL0E04312g:UPC2B:AFT1:SUT1:CAGL0I05390g:CAGL0J03960g:ZAP1:CAGL0J06006g:RME1:GAT1:HAP5:CAGL0L00583g:HAA1:CAGL0M01716g:SNF2:YAP6	10527:6261:51038:6974:71469:36278:31496:32968:45944:31939:2000222:36086:110045:43457:1900400:9272:71454:32048:6338:71931:1900231:61428:42766:6468:7021:6979:51321:34087:10827:34758:1900189:10674:1990641:61416:30437:6457:71629:7059:51447:42308:1080:34629:42148:61402:45835:6351:46020:36003:7124:10508:71169:122:6302:90294:9749:1403:45132:10973:10515:436:61186:43044:6357:2000219:6879:44843:9405:61412:…
6879	cellular iron ion homeostasis	0.00088	8 out of 148 genes, 5.4%	33 out of 5615 background genes, 0.6%	0	HMX1:CTH2:FET3:AFT1:FTR1:CAGL0J07980g:HAP5:CAGL0L11990g	55114:31065:122:34755:30036:46688:7059:42167:6979:45944:33215:2000678:45132:36086:436:1901684:6788:34087:43457:45454:956:34758:34759:6879:32048:9405:1990641:6878:6825:34599
98771	inorganic ion homeostasis	0.0049	13 out of 148 genes, 8.8%	115 out of 5615 background genes, 2.0%	0.0133	PMA1:HMX1:CTH2:FET3:PFK1:AFT1:FTR1:CAGL0J07980g:CAGL0K07392g:HAP5:CNB1:PFK2:CAGL0L11990g	6096:44117:30036:6402:34976:7059:42167:45944:33215:1902600:2000678:36086:1904263:6002:6788:55085:43457:45454:34759:6882:32048:6754:6812:30388:34599:55114:31065:70370:122:70072:7035:55074:34755:46688:6979:45132:436:1901684:34087:31505:1902906:51453:956:34758:6879:35690:120029:1990641:9405:6825:6878
55080	cation homeostasis	0.00651	13 out of 148 genes, 8.8%	118 out of 5615 background genes, 2.1%	0.01	PMA1:HMX1:CTH2:FET3:PFK1:AFT1:FTR1:CAGL0J07980g:CAGL0K07392g:HAP5:CNB1:PFK2:CAGL0L11990g	6096:44117:30036:6402:34976:7059:42167:45944:33215:1902600:2000678:36086:1904263:6002:6788:55085:43457:45454:34759:6882:32048:6754:6812:30388:34599:55114:31065:70370:122:70072:7035:55074:34755:46688:6979:45132:436:1901684:34087:31505:1902906:34758:956:51453:6879:35690:9405:1990641:120029:6878:6825
46916	cellular transition metal ion homeostasis	0.00987	9 out of 148 genes, 6.1%	58 out of 5615 background genes, 1.0%	0.0067	HMX1:CTH2:FET3:AFT1:FTR1:CAGL0J07980g:CAGL0K07392g:HAP5:CAGL0L11990g	30036:7059:42167:45944:33215:2000678:36086:6788:55085:43457:45454:34759:6882:32048:6812:34599:55114:31065:122:34755:46688:6979:45132:436:1901684:34087:34758:956:6879:9405:1990641:6878:6825
6826	iron ion transport	0.01139	5 out of 148 genes, 3.4%	14 out of 5615 background genes, 0.2%	0.005	SIT1:FET3:FTR1:CAGL0K12738g:FTH1	33215:15891:55114:34755:6826:46688:44718:1901684
30003	cellular cation homeostasis	0.012	12 out of 148 genes, 8.1%	107 out of 5615 background genes, 1.9%	0.0044	PMA1:HMX1:CTH2:FET3:PFK1:AFT1:FTR1:CAGL0J07980g:CAGL0K07392g:HAP5:PFK2:CAGL0L11990g	6096:30036:7059:42167:45944:33215:1902600:2000678:36086:1904263:6002:6788:55085:43457:45454:34759:6882:32048:6754:6812:30388:34599:55114:31065:122:70072:7035:34755:46688:6979:45132:436:1901684:34087:1902906:34758:956:51453:6879:9405:1990641:120029:6878:6825
55076	transition metal ion homeostasis	0.01504	9 out of 148 genes, 6.1%	61 out of 5615 background genes, 1.1%	0.006	HMX1:CTH2:FET3:AFT1:FTR1:CAGL0J07980g:CAGL0K07392g:HAP5:CAGL0L11990g	30036:7059:42167:45944:33215:2000678:36086:6788:55085:43457:45454:34759:6882:32048:6812:34599:55114:31065:122:34755:46688:6979:45132:436:1901684:34087:34758:956:6879:9405:1990641:6878:6825
6873	cellular ion homeostasis	0.0249	12 out of 148 genes, 8.1%	115 out of 5615 background genes, 2.0%	0.005	PMA1:HMX1:CTH2:FET3:PFK1:AFT1:FTR1:CAGL0J07980g:CAGL0K07392g:HAP5:PFK2:CAGL0L11990g	6096:30036:7059:42167:45944:33215:1902600:2000678:36086:1904263:6002:6788:55085:43457:45454:34759:6882:32048:6754:6812:30388:34599:55114:31065:122:70072:7035:34755:46688:6979:45132:436:1901684:34087:1902906:34758:956:51453:6879:9405:1990641:120029:6878:6825
41	transition metal ion transport	0.05056	6 out of 148 genes, 4.1%	29 out of 5615 background genes, 0.5%	0.0077	SIT1:FET3:FTR1:CAGL0J07980g:CAGL0K12738g:FTH1	33215:15891:34759:34599:55114:34755:6826:46688:44718:1901684:6879:6878:6825
55065	metal ion homeostasis	0.0715	10 out of 148 genes, 6.8%	91 out of 5615 background genes, 1.6%	0.0093	HMX1:CTH2:FET3:AFT1:FTR1:CAGL0J07980g:CAGL0K07392g:HAP5:CNB1:CAGL0L11990g	30036:45944:33215:2000678:36086:55085:43457:45454:34759:6882:32048:55114:70370:6979:34087:31505:34758:1990641:6825:44117:6402:34976:7059:42167:6788:6812:34599:31065:122:55074:34755:46688:45132:436:1901684:956:6879:35690:9405:6878
	GO-Term enrichment employing FungiDB database
ID	Name	P-value	Bgd count	Result count	Result gene list	Pct of bgd	Fold enrichment	Odds ratio	Benjamini	Bonferroni
GO:0009405	pathogenesis	0.000281778	172	14	CAGL0E03762g,CAGL0F06413g,CAGL0G03927g,CAGL0H03487g,CAGL0H07667g,CAGL0I06743g,CAGL0J05060g,CAGL0K07634g,CAGL0L00605g,CAGL0L03135g,CAGL0M01716g,CAGL0M04807g,CAGL0M07634g,CAGL0M12430g,	8.1	2.91	3.3	0.00976346	0.422385
GO:0042710	biofilm formation	0.000347525	80	9	CAGL0E03245g,CAGL0F00407g,CAGL0J05060g,CAGL0K07007g,CAGL0L00583g,CAGL0L02453g,CAGL0M01716g,CAGL0M07634g,CAGL0M12430g,	11.3	4.03	4.63	0.0115765	0.52094
GO:0006950	response to stress	0.000802292	792	37	CAGL0A00495g,CAGL0A03905g,CAGL0B03421g,CAGL0C02519g,CAGL0E03762g,CAGL0E04312g,CAGL0F03003g,CAGL0F06413g,CAGL0F07865g,CAGL0G03179g,CAGL0G08019g,CAGL0H03487g,CAGL0H04037g,CAGL0I01166g,CAGL0I05390g,CAGL0I06743g,CAGL0J03256g,CAGL0J03960g,CAGL0J05060g,CAGL0J06006g,CAGL0J07980g,CAGL0K04235g,CAGL0K04741g,CAGL0K05995g,CAGL0K07392g,CAGL0K07634g,CAGL0K09900g,CAGL0L00583g,CAGL0L00605g,CAGL0L03135g,CAGL0L052…	4.7	1.67	1.94	0.0218661	1
GO:0042594	response to starvation	0.00366768	200	13	CAGL0E03762g,CAGL0F06413g,CAGL0G08019g,CAGL0H03487g,CAGL0I05390g,CAGL0I06743g,CAGL0J05060g,CAGL0K04741g,CAGL0K07634g,CAGL0K09900g,CAGL0L03135g,CAGL0M04807g,CAGL0M07634g,	6.5	2.33	2.56	0.060416	1
GO:0045990	carbon catabolite regulation of transcription	0.0245235	40	4	CAGL0B03421g,CAGL0C02519g,CAGL0K09900g,CAGL0L00583g,	10	3.58	3.95	0.158634	1
GO:0006979	response to oxidative stress	0.0261501	128	8	CAGL0A03905g,CAGL0G03179g,CAGL0I01166g,CAGL0J07980g,CAGL0K04235g,CAGL0K09900g,CAGL0L05258g,CAGL0L11990g,	6.3	2.24	2.39	0.158634	1
GO:0006879	cellular iron ion homeostasis	2.35173e-07	34	9	CAGL0A03905g,CAGL0E01243g,CAGL0E03762g,CAGL0F06413g,CAGL0H03487g,CAGL0I06743g,CAGL0J07980g,CAGL0K09900g,CAGL0L11990g,	26.5	9.47	13.27	0.000352524	0.000352524
GO:0055072	iron ion homeostasis	6.64288e-07	38	9	CAGL0A03905g,CAGL0E01243g,CAGL0E03762g,CAGL0F06413g,CAGL0H03487g,CAGL0I06743g,CAGL0J07980g,CAGL0K09900g,CAGL0L11990g,	23.7	8.48	11.43	0.000416889	0.000995768
GO:0046916	cellular transition metal ion homeostasis	8.34333e-07	62	11	CAGL0A03905g,CAGL0E01243g,CAGL0E03762g,CAGL0F06413g,CAGL0H03487g,CAGL0I06743g,CAGL0J05060g,CAGL0J07980g,CAGL0K07392g,CAGL0K09900g,CAGL0L11990g,	17.7	6.35	8.03	0.000416889	0.00125067
GO:0055076	transition metal ion homeostasis	1.60156e-06	66	11	CAGL0A03905g,CAGL0E01243g,CAGL0E03762g,CAGL0F06413g,CAGL0H03487g,CAGL0I06743g,CAGL0J05060g,CAGL0J07980g,CAGL0K07392g,CAGL0K09900g,CAGL0L11990g,	16.7	5.97	7.44	0.000576155	0.00240074
GO:0098771	inorganic ion homeostasis	1.9218e-06	127	15	CAGL0A00495g,CAGL0A03905g,CAGL0E01243g,CAGL0E03762g,CAGL0F06413g,CAGL0F08041g,CAGL0H03487g,CAGL0I06743g,CAGL0J05060g,CAGL0J07980g,CAGL0K07392g,CAGL0K09900g,CAGL0L00605g,CAGL0L10758g,CAGL0L11990g,	11.8	4.23	5.07	0.000576155	0.00288078
GO:0055080	cation homeostasis	2.59068e-06	130	15	CAGL0A00495g,CAGL0A03905g,CAGL0E01243g,CAGL0E03762g,CAGL0F06413g,CAGL0F08041g,CAGL0H03487g,CAGL0I06743g,CAGL0J05060g,CAGL0J07980g,CAGL0K07392g,CAGL0K09900g,CAGL0L00605g,CAGL0L10758g,CAGL0L11990g,	11.5	4.13	4.94	0.000647238	0.00388343
GO:0010106	cellular response to iron ion starvation	3.58366e-06	10	5	CAGL0E03762g,CAGL0F06413g,CAGL0H03487g,CAGL0I06743g,CAGL0K09900g,	50	17.9	35.97	0.000765721	0.0053719
GO:0030003	cellular cation homeostasis	4.08657e-06	118	14	CAGL0A00495g,CAGL0A03905g,CAGL0E01243g,CAGL0E03762g,CAGL0F06413g,CAGL0F08041g,CAGL0H03487g,CAGL0I06743g,CAGL0J05060g,CAGL0J07980g,CAGL0K07392g,CAGL0K09900g,CAGL0L10758g,CAGL0L11990g,	11.9	4.25	5.07	0.000765721	0.00612577
GO:0045927	positive regulation of growth	5.88377e-06	75	11	CAGL0E03762g,CAGL0E04312g,CAGL0F07865g,CAGL0H07667g,CAGL0K04257g,CAGL0K09900g,CAGL0L00583g,CAGL0L02453g,CAGL0M01716g,CAGL0M04807g,CAGL0M07634g,	14.7	5.25	6.38	0.000979974	0.00881977
GO:0050801	ion homeostasis	7.19513e-06	141	15	CAGL0A00495g,CAGL0A03905g,CAGL0E01243g,CAGL0E03762g,CAGL0F06413g,CAGL0F08041g,CAGL0H03487g,CAGL0I06743g,CAGL0J05060g,CAGL0J07980g,CAGL0K07392g,CAGL0K09900g,CAGL0L00605g,CAGL0L10758g,CAGL0L11990g,	10.6	3.81	4.5	0.00107855	0.0107855
GO:0006873	cellular ion homeostasis	8.1061e-06	125	14	CAGL0A00495g,CAGL0A03905g,CAGL0E01243g,CAGL0E03762g,CAGL0F06413g,CAGL0F08041g,CAGL0H03487g,CAGL0I06743g,CAGL0J05060g,CAGL0J07980g,CAGL0K07392g,CAGL0K09900g,CAGL0L10758g,CAGL0L11990g,	11.2	4.01	4.74	0.00110464	0.0121511
GO:0006826	iron ion transport	1.07628e-05	12	5	CAGL0E04092g,CAGL0F06413g,CAGL0I06743g,CAGL0K12738g,CAGL0M05511g,	41.7	14.91	25.68	0.00134445	0.0161334
GO:0055065	metal ion homeostasis	1.83366e-05	100	12	CAGL0A03905g,CAGL0E01243g,CAGL0E03762g,CAGL0F06413g,CAGL0H03487g,CAGL0I06743g,CAGL0J05060g,CAGL0J07980g,CAGL0K07392g,CAGL0K09900g,CAGL0L00605g,CAGL0L11990g,	12	4.29	5.07	0.00204991	0.0274866
GO:0048878	chemical homeostasis	1.97978e-05	172	16	CAGL0A00495g,CAGL0A03905g,CAGL0E01243g,CAGL0E03762g,CAGL0F06413g,CAGL0F08041g,CAGL0G08624g,CAGL0H03487g,CAGL0I06743g,CAGL0J05060g,CAGL0J07980g,CAGL0K07392g,CAGL0K09900g,CAGL0L00605g,CAGL0L10758g,CAGL0L11990g,	9.3	3.33	3.88	0.00204991	0.029677
GO:0034756	regulation of iron ion transport	2.1384e-05	3	3	CAGL0H03487g,CAGL0J07980g,CAGL0M04807g,	100	35.79	inf	0.00204991	0.0320545
GO:0043618	regulation of transcription from RNA polymerase II promoter in response to stress	2.33008e-05	57	9	CAGL0B03421g,CAGL0C02519g,CAGL0H03487g,CAGL0J05060g,CAGL0K09900g,CAGL0L00583g,CAGL0L09339g,CAGL0M01716g,CAGL0M04807g,	15.8	5.65	6.88	0.00204991	0.0349279
GO:0043620	regulation of DNA-templated transcription in response to stress	2.33008e-05	57	9	CAGL0B03421g,CAGL0C02519g,CAGL0H03487g,CAGL0J05060g,CAGL0K09900g,CAGL0L00583g,CAGL0L09339g,CAGL0M01716g,CAGL0M04807g,	15.8	5.65	6.88	0.00204991	0.0349279
GO:0090033	positive regulation of filamentous growth	2.59828e-05	72	10	CAGL0E03762g,CAGL0E04312g,CAGL0F07865g,CAGL0H07667g,CAGL0K04257g,CAGL0K09900g,CAGL0L02453g,CAGL0M01716g,CAGL0M04807g,CAGL0M07634g,	13.9	4.97	5.95	0.00204991	0.0389483
GO:1900430	positive regulation of filamentous growth of a population of unicellular organisms	2.59828e-05	72	10	CAGL0E03762g,CAGL0E04312g,CAGL0F07865g,CAGL0H07667g,CAGL0K04257g,CAGL0K09900g,CAGL0L02453g,CAGL0M01716g,CAGL0M04807g,CAGL0M07634g,	13.9	4.97	5.95	0.00204991	0.0389483
GO:0043269	regulation of ion transport	2.92948e-05	23	6	CAGL0F02387g,CAGL0H03487g,CAGL0J05060g,CAGL0J07980g,CAGL0L12892g,CAGL0M04807g,	26.1	9.34	12.76	0.00214481	0.0439129
GO:0006875	cellular metal ion homeostasis	3.13452e-05	89	11	CAGL0A03905g,CAGL0E01243g,CAGL0E03762g,CAGL0F06413g,CAGL0H03487g,CAGL0I06743g,CAGL0J05060g,CAGL0J07980g,CAGL0K07392g,CAGL0K09900g,CAGL0L11990g,	12.4	4.42	5.22	0.00214481	0.0469864
GO:0045944	positive regulation of transcription by RNA polymerase II	3.14782e-05	261	20	CAGL0B03421g,CAGL0E03762g,CAGL0E04312g,CAGL0F07865g,CAGL0H03487g,CAGL0I04246g,CAGL0I05390g,CAGL0J03960g,CAGL0J05060g,CAGL0J06006g,CAGL0K04257g,CAGL0K07634g,CAGL0K09900g,CAGL0L00583g,CAGL0L02453g,CAGL0L09339g,CAGL0M01716g,CAGL0M04807g,CAGL0M07634g,CAGL0M08800g,	7.7	2.74	3.18	0.00214481	0.0471859
GO:0034755	iron ion transmembrane transport	3.75481e-05	8	4	CAGL0F06413g,CAGL0I06743g,CAGL0K12738g,CAGL0M05511g,	50	17.9	35.73	0.00244716	0.0562847
GO:0009628	response to abiotic stimulus	4.86128e-05	269	20	CAGL0A00495g,CAGL0B03421g,CAGL0C02519g,CAGL0E03762g,CAGL0E04312g,CAGL0F00407g,CAGL0F03003g,CAGL0F07865g,CAGL0H04037g,CAGL0I01166g,CAGL0J03256g,CAGL0K05995g,CAGL0K07007g,CAGL0K09900g,CAGL0L00583g,CAGL0L00605g,CAGL0L09339g,CAGL0M04807g,CAGL0M07634g,CAGL0M12430g,	7.4	2.66	3.07	0.00303628	0.0728706
GO:0055082	cellular chemical homeostasis	5.59474e-05	148	14	CAGL0A00495g,CAGL0A03905g,CAGL0E01243g,CAGL0E03762g,CAGL0F06413g,CAGL0F08041g,CAGL0H03487g,CAGL0I06743g,CAGL0J05060g,CAGL0J07980g,CAGL0K07392g,CAGL0K09900g,CAGL0L10758g,CAGL0L11990g,	9.5	3.39	3.91	0.00335461	0.0838652
GO:0010959	regulation of metal ion transport	6.61202e-05	9	4	CAGL0H03487g,CAGL0J05060g,CAGL0J07980g,CAGL0M04807g,	44.4	15.91	28.58	0.00371389	0.0991142
GO:0055085	transmembrane transport	6.85895e-05	321	22	CAGL0A00495g,CAGL0A01243g,CAGL0A02321g,CAGL0E04092g,CAGL0F00187g,CAGL0F01419g,CAGL0F02387g,CAGL0F04499g,CAGL0F06413g,CAGL0F08041g,CAGL0G03927g,CAGL0G08624g,CAGL0H08393g,CAGL0I06743g,CAGL0I08613g,CAGL0I09086g,CAGL0K05753g,CAGL0K07392g,CAGL0K12738g,CAGL0L00671g,CAGL0L10758g,CAGL0M05511g,	6.9	2.45	2.83	0.00371389	0.102816
GO:0044419	interspecies interaction between organisms	6.93722e-05	211	17	CAGL0E03762g,CAGL0F06413g,CAGL0G03927g,CAGL0H03487g,CAGL0H07667g,CAGL0I06743g,CAGL0J05060g,CAGL0K04741g,CAGL0K07634g,CAGL0L00583g,CAGL0L00605g,CAGL0L02453g,CAGL0L03135g,CAGL0M01716g,CAGL0M04807g,CAGL0M07634g,CAGL0M12430g,	8.1	2.88	3.31	0.00371389	0.103989
GO:0046688	response to copper ion	7.50797e-05	17	5	CAGL0D01265g,CAGL0E03762g,CAGL0F06413g,CAGL0K09900g,CAGL0L09339g,	29.4	10.53	14.97	0.00388085	0.112545
GO:1900428	regulation of filamentous growth of a population of unicellular organisms	8.02813e-05	134	13	CAGL0E03762g,CAGL0E04312g,CAGL0E04334g,CAGL0F07865g,CAGL0H07667g,CAGL0I04246g,CAGL0K04257g,CAGL0K09900g,CAGL0L02453g,CAGL0M01716g,CAGL0M04807g,CAGL0M07634g,CAGL0M11990g,	9.7	3.47	4	0.00394621	0.120342
GO:0044403	symbiont process	8.16094e-05	82	10	CAGL0E03762g,CAGL0H07667g,CAGL0I06743g,CAGL0K04741g,CAGL0L00583g,CAGL0L00605g,CAGL0L02453g,CAGL0M01716g,CAGL0M07634g,CAGL0M12430g,	12.2	4.36	5.11	0.00394621	0.122332
GO:1900231	regulation of single-species biofilm formation on inanimate substrate	9.73961e-05	28	6	CAGL0J05060g,CAGL0L00583g,CAGL0L02453g,CAGL0M01716g,CAGL0M04807g,CAGL0M07634g,	21.4	7.67	9.85	0.0045624	0.145997
GO:0044011	single-species biofilm formation on inanimate substrate	0.000110305	69	9	CAGL0E03245g,CAGL0F00407g,CAGL0J05060g,CAGL0K07007g,CAGL0L00583g,CAGL0L02453g,CAGL0M01716g,CAGL0M07634g,CAGL0M12430g,	13	4.67	5.49	0.00486315	0.165347
GO:0051703	intraspecies interaction between organisms	0.000110305	69	9	CAGL0E03245g,CAGL0F00407g,CAGL0J05060g,CAGL0K07007g,CAGL0L00583g,CAGL0L02453g,CAGL0M01716g,CAGL0M07634g,CAGL0M12430g,	13	4.67	5.49	0.00486315	0.165347
GO:0000041	transition metal ion transport	0.000120001	29	6	CAGL0E04092g,CAGL0F06413g,CAGL0I06743g,CAGL0J07980g,CAGL0K12738g,CAGL0M05511g,	20.7	7.4	9.42	0.00513946	0.179881
GO:0010570	regulation of filamentous growth	0.000126105	140	13	CAGL0E03762g,CAGL0E04312g,CAGL0E04334g,CAGL0F07865g,CAGL0H07667g,CAGL0I04246g,CAGL0K04257g,CAGL0K09900g,CAGL0L02453g,CAGL0M01716g,CAGL0M04807g,CAGL0M07634g,CAGL0M11990g,	9.3	3.32	3.81	0.00525087	0.189031
GO:1902680	positive regulation of RNA biosynthetic process	0.000201664	298	20	CAGL0B03421g,CAGL0E03762g,CAGL0E04312g,CAGL0F07865g,CAGL0H03487g,CAGL0I04246g,CAGL0I05390g,CAGL0J03960g,CAGL0J05060g,CAGL0J06006g,CAGL0K04257g,CAGL0K07634g,CAGL0K09900g,CAGL0L00583g,CAGL0L02453g,CAGL0L09339g,CAGL0M01716g,CAGL0M04807g,CAGL0M07634g,CAGL0M08800g,	6.7	2.4	2.74	0.00775113	0.302294
GO:0045893	positive regulation of transcription, DNA-templated	0.000201664	298	20	CAGL0B03421g,CAGL0E03762g,CAGL0E04312g,CAGL0F07865g,CAGL0H03487g,CAGL0I04246g,CAGL0I05390g,CAGL0J03960g,CAGL0J05060g,CAGL0J06006g,CAGL0K04257g,CAGL0K07634g,CAGL0K09900g,CAGL0L00583g,CAGL0L02453g,CAGL0L09339g,CAGL0M01716g,CAGL0M04807g,CAGL0M07634g,CAGL0M08800g,	6.7	2.4	2.74	0.00775113	0.302294
GO:1903508	positive regulation of nucleic acid-templated transcription	0.000201664	298	20	CAGL0B03421g,CAGL0E03762g,CAGL0E04312g,CAGL0F07865g,CAGL0H03487g,CAGL0I04246g,CAGL0I05390g,CAGL0J03960g,CAGL0J05060g,CAGL0J06006g,CAGL0K04257g,CAGL0K07634g,CAGL0K09900g,CAGL0L00583g,CAGL0L02453g,CAGL0L09339g,CAGL0M01716g,CAGL0M04807g,CAGL0M07634g,CAGL0M08800g,	6.7	2.4	2.74	0.00775113	0.302294
GO:0090609	single-species submerged biofilm formation	0.000211956	75	9	CAGL0E03245g,CAGL0F00407g,CAGL0J05060g,CAGL0K07007g,CAGL0L00583g,CAGL0L02453g,CAGL0M01716g,CAGL0M07634g,CAGL0M12430g,	12	4.29	4.99	0.00794303	0.317721
GO:0040008	regulation of growth	0.000234425	169	14	CAGL0E03762g,CAGL0E04312g,CAGL0E04334g,CAGL0F07865g,CAGL0H07667g,CAGL0I04246g,CAGL0K04257g,CAGL0K09900g,CAGL0L00583g,CAGL0L02453g,CAGL0M01716g,CAGL0M04807g,CAGL0M07634g,CAGL0M11990g,	8.3	2.96	3.37	0.0085708	0.351403
GO:0044010	single-species biofilm formation	0.000259613	77	9	CAGL0E03245g,CAGL0F00407g,CAGL0J05060g,CAGL0K07007g,CAGL0L00583g,CAGL0L02453g,CAGL0M01716g,CAGL0M07634g,CAGL0M12430g,	11.7	4.18	4.84	0.00926571	0.38916
GO:0090605	submerged biofilm formation	0.000286586	78	9	CAGL0E03245g,CAGL0F00407g,CAGL0J05060g,CAGL0K07007g,CAGL0L00583g,CAGL0L02453g,CAGL0M01716g,CAGL0M07634g,CAGL0M12430g,	11.5	4.13	4.77	0.00976346	0.429592
GO:0051254	positive regulation of RNA metabolic process	0.000356212	311	20	CAGL0B03421g,CAGL0E03762g,CAGL0E04312g,CAGL0F07865g,CAGL0H03487g,CAGL0I04246g,CAGL0I05390g,CAGL0J03960g,CAGL0J05060g,CAGL0J06006g,CAGL0K04257g,CAGL0K07634g,CAGL0K09900g,CAGL0L00583g,CAGL0L02453g,CAGL0L09339g,CAGL0M01716g,CAGL0M04807g,CAGL0M07634g,CAGL0M08800g,	6.4	2.3	2.61	0.0116079	0.533961
GO:0006812	cation transport	0.000426375	138	12	CAGL0A00495g,CAGL0E04092g,CAGL0F02387g,CAGL0F06413g,CAGL0F08041g,CAGL0G03927g,CAGL0I06743g,CAGL0J07980g,CAGL0K07392g,CAGL0K12738g,CAGL0L10758g,CAGL0M05511g,	8.7	3.11	3.52	0.0135652	0.639136
GO:0045935	positive regulation of nucleobase-containing compound metabolic process	0.000434377	340	21	CAGL0B03421g,CAGL0E03762g,CAGL0E04312g,CAGL0F07865g,CAGL0H03487g,CAGL0I04246g,CAGL0I05390g,CAGL0J03960g,CAGL0J05060g,CAGL0J06006g,CAGL0K04257g,CAGL0K07634g,CAGL0K09900g,CAGL0K09922g,CAGL0L00583g,CAGL0L02453g,CAGL0L09339g,CAGL0M01716g,CAGL0M04807g,CAGL0M07634g,CAGL0M08800g,	6.2	2.21	2.5	0.0135652	0.651132
GO:0051049	regulation of transport	0.000545049	103	10	CAGL0F02387g,CAGL0F07865g,CAGL0G03179g,CAGL0H03487g,CAGL0I04246g,CAGL0I05390g,CAGL0J05060g,CAGL0J07980g,CAGL0L12892g,CAGL0M04807g,	9.7	3.47	3.94	0.016674	0.817028
GO:0071280	cellular response to copper ion	0.000628202	15	4	CAGL0D01265g,CAGL0E03762g,CAGL0K09900g,CAGL0L09339g,	26.7	9.54	12.97	0.0188335	0.941675
GO:0031669	cellular response to nutrient levels	0.000677009	232	16	CAGL0B03421g,CAGL0C02519g,CAGL0E03762g,CAGL0F06413g,CAGL0G08019g,CAGL0H03487g,CAGL0I05390g,CAGL0I06743g,CAGL0J05060g,CAGL0K04741g,CAGL0K07634g,CAGL0K09900g,CAGL0L00583g,CAGL0L03135g,CAGL0M04807g,CAGL0M07634g,	6.9	2.47	2.77	0.0198987	1
GO:0019725	cellular homeostasis	0.000698106	188	14	CAGL0A00495g,CAGL0A03905g,CAGL0E01243g,CAGL0E03762g,CAGL0F06413g,CAGL0F08041g,CAGL0H03487g,CAGL0I06743g,CAGL0J05060g,CAGL0J07980g,CAGL0K07392g,CAGL0K09900g,CAGL0L10758g,CAGL0L11990g,	7.4	2.67	2.99	0.0201243	1
GO:1901684	arsenate ion transmembrane transport	0.000775534	2	2	CAGL0F06413g,CAGL0I06743g,	100	35.79	inf	0.0216955	1
GO:0044406	adhesion of symbiont to host	0.000781559	27	5	CAGL0H07667g,CAGL0L00583g,CAGL0L02453g,CAGL0M01716g,CAGL0M07634g,	18.5	6.63	8.15	0.0216955	1
GO:1900190	regulation of single-species biofilm formation	0.000861622	41	6	CAGL0J05060g,CAGL0L00583g,CAGL0L02453g,CAGL0M01716g,CAGL0M04807g,CAGL0M07634g,	14.6	5.24	6.17	0.0230638	1
GO:0031668	cellular response to extracellular stimulus	0.000934764	239	16	CAGL0B03421g,CAGL0C02519g,CAGL0E03762g,CAGL0F06413g,CAGL0G08019g,CAGL0H03487g,CAGL0I05390g,CAGL0I06743g,CAGL0J05060g,CAGL0K04741g,CAGL0K07634g,CAGL0K09900g,CAGL0L00583g,CAGL0L03135g,CAGL0M04807g,CAGL0M07634g,	6.7	2.4	2.68	0.0245827	1
GO:0051704	multi-organism process	0.000984584	413	23	CAGL0E03245g,CAGL0E03762g,CAGL0F00407g,CAGL0F06413g,CAGL0G00308g,CAGL0G03927g,CAGL0G08624g,CAGL0H01375g,CAGL0H03487g,CAGL0H07667g,CAGL0I06743g,CAGL0J05060g,CAGL0K04741g,CAGL0K07007g,CAGL0K07634g,CAGL0L00583g,CAGL0L00605g,CAGL0L02453g,CAGL0L03135g,CAGL0M01716g,CAGL0M04807g,CAGL0M07634g,CAGL0M12430g,	5.6	1.99	2.25	0.0254464	1
GO:0036171	filamentous growth of a population of unicellular organisms in response to chemical stimulus	0.0010991	29	5	CAGL0E03762g,CAGL0E04312g,CAGL0K09900g,CAGL0L03135g,CAGL0M07634g,	17.2	6.17	7.47	0.027438	1
GO:0044107	cellular alcohol metabolic process	0.0010991	29	5	CAGL0A00429g,CAGL0E04334g,CAGL0F07865g,CAGL0K04477g,CAGL0M04807g,	17.2	6.17	7.47	0.027438	1
GO:0031667	response to nutrient levels	0.00111655	243	16	CAGL0B03421g,CAGL0C02519g,CAGL0E03762g,CAGL0F06413g,CAGL0G08019g,CAGL0H03487g,CAGL0I05390g,CAGL0I06743g,CAGL0J05060g,CAGL0K04741g,CAGL0K07634g,CAGL0K09900g,CAGL0L00583g,CAGL0L03135g,CAGL0M04807g,CAGL0M07634g,	6.6	2.36	2.63	0.027438	1
GO:0071496	cellular response to external stimulus	0.00116643	244	16	CAGL0B03421g,CAGL0C02519g,CAGL0E03762g,CAGL0F06413g,CAGL0G08019g,CAGL0H03487g,CAGL0I05390g,CAGL0I06743g,CAGL0J05060g,CAGL0K04741g,CAGL0K07634g,CAGL0K09900g,CAGL0L00583g,CAGL0L03135g,CAGL0M04807g,CAGL0M07634g,	6.6	2.35	2.62	0.0282012	1
GO:0010628	positive regulation of gene expression	0.00128448	344	20	CAGL0B03421g,CAGL0E03762g,CAGL0E04312g,CAGL0F07865g,CAGL0H03487g,CAGL0I04246g,CAGL0I05390g,CAGL0J03960g,CAGL0J05060g,CAGL0J06006g,CAGL0K04257g,CAGL0K07634g,CAGL0K09900g,CAGL0L00583g,CAGL0L02453g,CAGL0L09339g,CAGL0M01716g,CAGL0M04807g,CAGL0M07634g,CAGL0M08800g,	5.8	2.08	2.33	0.030205	1
GO:0070786	positive regulation of growth of unicellular organism as a thread of attached cells	0.0012896	30	5	CAGL0K04257g,CAGL0L02453g,CAGL0M01716g,CAGL0M04807g,CAGL0M07634g,	16.7	5.97	7.17	0.030205	1
GO:0009991	response to extracellular stimulus	0.00144512	249	16	CAGL0B03421g,CAGL0C02519g,CAGL0E03762g,CAGL0F06413g,CAGL0G08019g,CAGL0H03487g,CAGL0I05390g,CAGL0I06743g,CAGL0J05060g,CAGL0K04741g,CAGL0K07634g,CAGL0K09900g,CAGL0L00583g,CAGL0L03135g,CAGL0M04807g,CAGL0M07634g,	6.4	2.3	2.56	0.0333266	1
GO:0010557	positive regulation of macromolecule biosynthetic process	0.00147942	348	20	CAGL0B03421g,CAGL0E03762g,CAGL0E04312g,CAGL0F07865g,CAGL0H03487g,CAGL0I04246g,CAGL0I05390g,CAGL0J03960g,CAGL0J05060g,CAGL0J06006g,CAGL0K04257g,CAGL0K07634g,CAGL0K09900g,CAGL0L00583g,CAGL0L02453g,CAGL0L09339g,CAGL0M01716g,CAGL0M04807g,CAGL0M07634g,CAGL0M08800g,	5.7	2.06	2.3	0.0336008	1
GO:0044764	multi-organism cellular process	0.00152652	138	11	CAGL0E03245g,CAGL0F00407g,CAGL0G00308g,CAGL0J05060g,CAGL0K07007g,CAGL0L00583g,CAGL0L02453g,CAGL0L03135g,CAGL0M01716g,CAGL0M07634g,CAGL0M12430g,	8	2.85	3.18	0.0339748	1
GO:0072330	monocarboxylic acid biosynthetic process	0.00156566	62	7	CAGL0F03399g,CAGL0F08041g,CAGL0H01375g,CAGL0J03212g,CAGL0K04477g,CAGL0K12738g,CAGL0L10758g,	11.3	4.04	4.6	0.0339748	1
GO:0036293	response to decreased oxygen levels	0.00158655	9	3	CAGL0B03421g,CAGL0E03762g,CAGL0F07865g,	33.3	11.93	17.73	0.0339748	1
GO:0036294	cellular response to decreased oxygen levels	0.00158655	9	3	CAGL0B03421g,CAGL0E03762g,CAGL0F07865g,	33.3	11.93	17.73	0.0339748	1
GO:0030001	metal ion transport	0.00172088	63	7	CAGL0E04092g,CAGL0F02387g,CAGL0F06413g,CAGL0I06743g,CAGL0J07980g,CAGL0K12738g,CAGL0M05511g,	11.1	3.98	4.52	0.0363325	1
GO:0009268	response to pH	0.0019057	82	8	CAGL0E03762g,CAGL0E04312g,CAGL0F00407g,CAGL0K07007g,CAGL0K09900g,CAGL0L09339g,CAGL0M04807g,CAGL0M07634g,	9.8	3.49	3.92	0.0396756	1
GO:0042221	response to chemical	0.00210953	659	31	CAGL0A03905g,CAGL0B03421g,CAGL0C02519g,CAGL0D01265g,CAGL0E03762g,CAGL0E04092g,CAGL0E04312g,CAGL0E04334g,CAGL0F06413g,CAGL0F07865g,CAGL0G03179g,CAGL0G03927g,CAGL0G08624g,CAGL0I01166g,CAGL0I04246g,CAGL0I05390g,CAGL0J06006g,CAGL0J07980g,CAGL0K04235g,CAGL0K07392g,CAGL0K07634g,CAGL0K09900g,CAGL0L00583g,CAGL0L00605g,CAGL0L03135g,CAGL0L05258g,CAGL0L09339g,CAGL0L11990g,CAGL0M01716g,CAGL0M07634g,CAGL0M119…	4.7	1.68	1.91	0.0433177	1
GO:0040007	growth	0.00223109	466	24	CAGL0E03762g,CAGL0E04312g,CAGL0F00407g,CAGL0F06413g,CAGL0G08019g,CAGL0H01375g,CAGL0H07667g,CAGL0I05390g,CAGL0I06743g,CAGL0I09790g,CAGL0J05060g,CAGL0J11242g,CAGL0K04741g,CAGL0K07007g,CAGL0K07392g,CAGL0K09900g,CAGL0L00583g,CAGL0L00605g,CAGL0L02453g,CAGL0L03135g,CAGL0M01716g,CAGL0M04807g,CAGL0M07634g,CAGL0M11990g,	5.2	1.84	2.06	0.0451947	1
GO:0006811	ion transport	0.0023648	237	15	CAGL0A00495g,CAGL0E04092g,CAGL0E04312g,CAGL0F02387g,CAGL0F06413g,CAGL0F08041g,CAGL0G03927g,CAGL0H08393g,CAGL0I06743g,CAGL0J07980g,CAGL0K05753g,CAGL0K07392g,CAGL0K12738g,CAGL0L10758g,CAGL0M05511g,	6.3	2.27	2.5	0.0472646	1
GO:0009267	cellular response to starvation	0.00245447	191	13	CAGL0E03762g,CAGL0F06413g,CAGL0G08019g,CAGL0H03487g,CAGL0I05390g,CAGL0I06743g,CAGL0J05060g,CAGL0K04741g,CAGL0K07634g,CAGL0K09900g,CAGL0L03135g,CAGL0M04807g,CAGL0M07634g,	6.8	2.44	2.69	0.047986	1
GO:0098662	inorganic cation transmembrane transport	0.00246492	67	7	CAGL0A00495g,CAGL0F06413g,CAGL0F08041g,CAGL0I06743g,CAGL0K12738g,CAGL0L10758g,CAGL0M05511g,	10.4	3.74	4.21	0.047986	1
GO:0046165	alcohol biosynthetic process	0.00274414	51	6	CAGL0A00429g,CAGL0E04334g,CAGL0F07865g,CAGL0G02937g,CAGL0K04477g,CAGL0M12430g,	11.8	4.21	4.79	0.0509447	1
GO:0036176	response to neutral pH	0.00274414	51	6	CAGL0E03762g,CAGL0F00407g,CAGL0K07007g,CAGL0K09900g,CAGL0M04807g,CAGL0M07634g,	11.8	4.21	4.79	0.0509447	1
GO:0009891	positive regulation of biosynthetic process	0.00278845	367	20	CAGL0B03421g,CAGL0E03762g,CAGL0E04312g,CAGL0F07865g,CAGL0H03487g,CAGL0I04246g,CAGL0I05390g,CAGL0J03960g,CAGL0J05060g,CAGL0J06006g,CAGL0K04257g,CAGL0K07634g,CAGL0K09900g,CAGL0L00583g,CAGL0L02453g,CAGL0L09339g,CAGL0M01716g,CAGL0M04807g,CAGL0M07634g,CAGL0M08800g,	5.4	1.95	2.16	0.0509447	1
GO:0031328	positive regulation of cellular biosynthetic process	0.00278845	367	20	CAGL0B03421g,CAGL0E03762g,CAGL0E04312g,CAGL0F07865g,CAGL0H03487g,CAGL0I04246g,CAGL0I05390g,CAGL0J03960g,CAGL0J05060g,CAGL0J06006g,CAGL0K04257g,CAGL0K07634g,CAGL0K09900g,CAGL0L00583g,CAGL0L02453g,CAGL0L09339g,CAGL0M01716g,CAGL0M04807g,CAGL0M07634g,CAGL0M08800g,	5.4	1.95	2.16	0.0509447	1
GO:0006633	fatty acid biosynthetic process	0.00289099	22	4	CAGL0F03399g,CAGL0H01375g,CAGL0K04477g,CAGL0K12738g,	18.2	6.51	7.92	0.0509447	1
GO:0071214	cellular response to abiotic stimulus	0.0029656	150	11	CAGL0C02519g,CAGL0E03762g,CAGL0E04312g,CAGL0F03003g,CAGL0J03256g,CAGL0K09900g,CAGL0L00583g,CAGL0L09339g,CAGL0M04807g,CAGL0M07634g,CAGL0M12430g,	7.3	2.62	2.89	0.0509447	1
GO:0104004	cellular response to environmental stimulus	0.0029656	150	11	CAGL0C02519g,CAGL0E03762g,CAGL0E04312g,CAGL0F03003g,CAGL0J03256g,CAGL0K09900g,CAGL0L00583g,CAGL0L09339g,CAGL0M04807g,CAGL0M07634g,CAGL0M12430g,	7.3	2.62	2.89	0.0509447	1
GO:0051828	entry into other organism involved in symbiotic interaction	0.00299075	11	3	CAGL0E03762g,CAGL0M07634g,CAGL0M12430g,	27.3	9.76	13.3	0.0509447	1
GO:0044409	entry into host	0.00299075	11	3	CAGL0E03762g,CAGL0M07634g,CAGL0M12430g,	27.3	9.76	13.3	0.0509447	1
GO:0070482	response to oxygen levels	0.00299075	11	3	CAGL0B03421g,CAGL0E03762g,CAGL0F07865g,	27.3	9.76	13.3	0.0509447	1
GO:0071453	cellular response to oxygen levels	0.00299075	11	3	CAGL0B03421g,CAGL0E03762g,CAGL0F07865g,	27.3	9.76	13.3	0.0509447	1
GO:0098660	inorganic ion transmembrane transport	0.00316934	70	7	CAGL0A00495g,CAGL0F06413g,CAGL0F08041g,CAGL0I06743g,CAGL0K12738g,CAGL0L10758g,CAGL0M05511g,	10	3.58	4.01	0.0533802	1
GO:0006357	regulation of transcription by RNA polymerase II	0.00351877	401	21	CAGL0B03421g,CAGL0C02519g,CAGL0E03762g,CAGL0E04312g,CAGL0F07865g,CAGL0H03487g,CAGL0I04246g,CAGL0I05390g,CAGL0J03960g,CAGL0J05060g,CAGL0J06006g,CAGL0K04257g,CAGL0K07634g,CAGL0K09900g,CAGL0L00583g,CAGL0L02453g,CAGL0L09339g,CAGL0M01716g,CAGL0M04807g,CAGL0M07634g,CAGL0M08800g,	5.2	1.87	2.08	0.0586071	1
GO:0036003	positive regulation of transcription from RNA polymerase II promoter in response to stress	0.00379661	38	5	CAGL0H03487g,CAGL0J05060g,CAGL0L09339g,CAGL0M01716g,CAGL0M04807g,	13.2	4.71	5.42	0.0609997	1
GO:0016125	sterol metabolic process	0.00379661	38	5	CAGL0A00429g,CAGL0D05566g,CAGL0E04334g,CAGL0F07865g,CAGL0K04477g,	13.2	4.71	5.42	0.0609997	1
GO:0044117	growth of symbiont in host	0.00390659	12	3	CAGL0I06743g,CAGL0L00583g,CAGL0L00605g,	25	8.95	11.82	0.0609997	1
GO:0044110	growth involved in symbiotic interaction	0.00390659	12	3	CAGL0I06743g,CAGL0L00583g,CAGL0L00605g,	25	8.95	11.82	0.0609997	1
GO:0044116	growth of symbiont involved in interaction with host	0.00390659	12	3	CAGL0I06743g,CAGL0L00583g,CAGL0L00605g,	25	8.95	11.82	0.0609997	1
GO:0009605	response to external stimulus	0.00396505	275	16	CAGL0B03421g,CAGL0C02519g,CAGL0E03762g,CAGL0F06413g,CAGL0G08019g,CAGL0H03487g,CAGL0I05390g,CAGL0I06743g,CAGL0J05060g,CAGL0K04741g,CAGL0K07634g,CAGL0K09900g,CAGL0L00583g,CAGL0L03135g,CAGL0M04807g,CAGL0M07634g,	5.8	2.08	2.29	0.06114	1
GO:0070887	cellular response to chemical stimulus	0.00399715	515	25	CAGL0B03421g,CAGL0C02519g,CAGL0D01265g,CAGL0E03762g,CAGL0E04092g,CAGL0E04312g,CAGL0E04334g,CAGL0F06413g,CAGL0F07865g,CAGL0G03179g,CAGL0I01166g,CAGL0I04246g,CAGL0J06006g,CAGL0J07980g,CAGL0K04235g,CAGL0K07634g,CAGL0K09900g,CAGL0L00583g,CAGL0L00605g,CAGL0L05258g,CAGL0L09339g,CAGL0L11990g,CAGL0M01716g,CAGL0M07634g,CAGL0M11990g,	4.9	1.74	1.93	0.06114	1
GO:0042592	homeostatic process	0.00410875	276	16	CAGL0A00495g,CAGL0A03905g,CAGL0E01243g,CAGL0E03762g,CAGL0F06413g,CAGL0F08041g,CAGL0G08624g,CAGL0H03487g,CAGL0I06743g,CAGL0J05060g,CAGL0J07980g,CAGL0K07392g,CAGL0K09900g,CAGL0L00605g,CAGL0L10758g,CAGL0L11990g,	5.8	2.07	2.28	0.0622122	1
GO:0044283	small molecule biosynthetic process	0.0042567	277	16	CAGL0A00429g,CAGL0E04334g,CAGL0F03399g,CAGL0F07777g,CAGL0F07865g,CAGL0F08041g,CAGL0G02937g,CAGL0H01375g,CAGL0H07667g,CAGL0J03212g,CAGL0K03553g,CAGL0K04477g,CAGL0K12738g,CAGL0L10758g,CAGL0M12430g,CAGL0M12881g,	5.8	2.07	2.27	0.063808	1
GO:0032373	positive regulation of sterol transport	0.00448389	4	2	CAGL0F07865g,CAGL0I04246g,	50	17.9	35.25	0.0638539	1
GO:0006002	fructose 6-phosphate metabolic process	0.00448389	4	2	CAGL0F08041g,CAGL0L10758g,	50	17.9	35.25	0.0638539	1
GO:2000911	positive regulation of sterol import	0.00448389	4	2	CAGL0F07865g,CAGL0I04246g,	50	17.9	35.25	0.0638539	1
GO:0072369	regulation of lipid transport by positive regulation of transcription from RNA polymerase II promoter	0.00448389	4	2	CAGL0F07865g,CAGL0I04246g,	50	17.9	35.25	0.0638539	1
GO:0035969	positive regulation of sterol import by positive regulation of transcription from RNA polymerase II promoter	0.00448389	4	2	CAGL0F07865g,CAGL0I04246g,	50	17.9	35.25	0.0638539	1
GO:0044182	filamentous growth of a population of unicellular organisms	0.00451535	330	18	CAGL0E03762g,CAGL0E04312g,CAGL0F00407g,CAGL0F06413g,CAGL0G08019g,CAGL0H07667g,CAGL0I05390g,CAGL0J05060g,CAGL0J11242g,CAGL0K04741g,CAGL0K07007g,CAGL0K09900g,CAGL0L02453g,CAGL0L03135g,CAGL0M01716g,CAGL0M04807g,CAGL0M07634g,CAGL0M11990g,	5.5	1.95	2.15	0.0638539	1
GO:0048584	positive regulation of response to stimulus	0.00460232	115	9	CAGL0A00495g,CAGL0E03762g,CAGL0E04312g,CAGL0F07865g,CAGL0K04741g,CAGL0K09900g,CAGL0M01716g,CAGL0M04807g,CAGL0M07634g,	7.8	2.8	3.08	0.0644755	1
GO:0051173	positive regulation of nitrogen compound metabolic process	0.00480123	439	22	CAGL0B03421g,CAGL0E03762g,CAGL0E04312g,CAGL0F07865g,CAGL0H03487g,CAGL0I04246g,CAGL0I05390g,CAGL0J03960g,CAGL0J05060g,CAGL0J06006g,CAGL0K04257g,CAGL0K07634g,CAGL0K09900g,CAGL0K09922g,CAGL0L00583g,CAGL0L02453g,CAGL0L09339g,CAGL0L11990g,CAGL0M01716g,CAGL0M04807g,CAGL0M07634g,CAGL0M08800g,	5	1.79	1.98	0.0649764	1
GO:0055114	oxidation-reduction process	0.00489307	281	16	CAGL0A03905g,CAGL0E04334g,CAGL0F03399g,CAGL0F06413g,CAGL0F07777g,CAGL0H01375g,CAGL0I01166g,CAGL0I02574g,CAGL0J00451g,CAGL0J03212g,CAGL0K04477g,CAGL0K07007g,CAGL0K12738g,CAGL0L05258g,CAGL0M02101g,CAGL0M12881g,	5.7	2.04	2.23	0.0649764	1
GO:1900439	positive regulation of filamentous growth of a population of unicellular organisms in response to chemical stimulus	0.00497544	13	3	CAGL0E03762g,CAGL0E04312g,CAGL0M07634g,	23.1	8.26	10.63	0.0649764	1
GO:0034762	regulation of transmembrane transport	0.00497544	13	3	CAGL0F02387g,CAGL0I05390g,CAGL0J07980g,	23.1	8.26	10.63	0.0649764	1
GO:0032368	regulation of lipid transport	0.00497544	13	3	CAGL0F07865g,CAGL0I04246g,CAGL0L12892g,	23.1	8.26	10.63	0.0649764	1
GO:1905952	regulation of lipid localization	0.00497544	13	3	CAGL0F07865g,CAGL0I04246g,CAGL0L12892g,	23.1	8.26	10.63	0.0649764	1
GO:0050896	response to stimulus	0.00497617	1251	49	CAGL0A00495g,CAGL0A03905g,CAGL0B03421g,CAGL0C02519g,CAGL0D01265g,CAGL0E03762g,CAGL0E04092g,CAGL0E04312g,CAGL0E04334g,CAGL0F00407g,CAGL0F03003g,CAGL0F06413g,CAGL0F07865g,CAGL0G03179g,CAGL0G03927g,CAGL0G08019g,CAGL0G08624g,CAGL0H03487g,CAGL0H04037g,CAGL0H07667g,CAGL0I01166g,CAGL0I04246g,CAGL0I05390g,CAGL0I06743g,CAGL0J03256g,CAGL0J03960g,CAGL0J05060g,CAGL0J06006g,CAGL0J07980g,CAGL0J11242g,CAGL0K042…	3.9	1.4	1.63	0.0649764	1
GO:0033554	cellular response to stress	0.00507382	727	32	CAGL0B03421g,CAGL0C02519g,CAGL0E03762g,CAGL0E04312g,CAGL0F03003g,CAGL0F06413g,CAGL0F07865g,CAGL0G03179g,CAGL0G08019g,CAGL0H03487g,CAGL0I01166g,CAGL0I05390g,CAGL0I06743g,CAGL0J03256g,CAGL0J03960g,CAGL0J05060g,CAGL0J06006g,CAGL0J07980g,CAGL0K04235g,CAGL0K04741g,CAGL0K07634g,CAGL0K09900g,CAGL0L00583g,CAGL0L00605g,CAGL0L03135g,CAGL0L05258g,CAGL0L09339g,CAGL0L11990g,CAGL0M01716g,CAGL0M04807g,CAGL0M076…	4.4	1.58	1.77	0.0649764	1
GO:0010604	positive regulation of macromolecule metabolic process	0.0052065	442	22	CAGL0B03421g,CAGL0E03762g,CAGL0E04312g,CAGL0F07865g,CAGL0H03487g,CAGL0I04246g,CAGL0I05390g,CAGL0J03960g,CAGL0J05060g,CAGL0J06006g,CAGL0K04257g,CAGL0K07634g,CAGL0K09900g,CAGL0K09922g,CAGL0L00583g,CAGL0L02453g,CAGL0L09339g,CAGL0L11990g,CAGL0M01716g,CAGL0M04807g,CAGL0M07634g,CAGL0M08800g,	5	1.78	1.97	0.0649764	1
GO:0022610	biological adhesion	0.00525634	58	6	CAGL0H07667g,CAGL0L00583g,CAGL0L02453g,CAGL0M01716g,CAGL0M07634g,CAGL0M12430g,	10.3	3.7	4.14	0.0649764	1
GO:0008202	steroid metabolic process	0.0053009	41	5	CAGL0A00429g,CAGL0D05566g,CAGL0E04334g,CAGL0F07865g,CAGL0K04477g,	12.2	4.36	4.97	0.0649764	1
GO:0006066	alcohol metabolic process	0.00540634	77	7	CAGL0A00429g,CAGL0E04334g,CAGL0F07865g,CAGL0G02937g,CAGL0K04477g,CAGL0M04807g,CAGL0M12430g,	9.1	3.25	3.6	0.0649764	1
GO:0097384	cellular lipid biosynthetic process	0.00541831	26	4	CAGL0A00429g,CAGL0E04334g,CAGL0F07865g,CAGL0K04477g,	15.4	5.51	6.47	0.0649764	1
GO:0016129	phytosteroid biosynthetic process	0.00541831	26	4	CAGL0A00429g,CAGL0E04334g,CAGL0F07865g,CAGL0K04477g,	15.4	5.51	6.47	0.0649764	1
GO:0044108	cellular alcohol biosynthetic process	0.00541831	26	4	CAGL0A00429g,CAGL0E04334g,CAGL0F07865g,CAGL0K04477g,	15.4	5.51	6.47	0.0649764	1
GO:0002833	positive regulation of response to biotic stimulus	0.00541831	26	4	CAGL0K09900g,CAGL0M01716g,CAGL0M04807g,CAGL0M07634g,	15.4	5.51	6.47	0.0649764	1
GO:1900445	positive regulation of filamentous growth of a population of unicellular organisms in response to biotic stimulus	0.00541831	26	4	CAGL0K09900g,CAGL0M01716g,CAGL0M04807g,CAGL0M07634g,	15.4	5.51	6.47	0.0649764	1
GO:0006696	ergosterol biosynthetic process	0.00541831	26	4	CAGL0A00429g,CAGL0E04334g,CAGL0F07865g,CAGL0K04477g,	15.4	5.51	6.47	0.0649764	1
GO:0007155	cell adhesion	0.00588449	42	5	CAGL0L00583g,CAGL0L02453g,CAGL0M01716g,CAGL0M07634g,CAGL0M12430g,	11.9	4.26	4.83	0.0700067	1
GO:0031325	positive regulation of cellular metabolic process	0.00613664	476	23	CAGL0B03421g,CAGL0E03762g,CAGL0E04312g,CAGL0F07865g,CAGL0H03487g,CAGL0I04246g,CAGL0I05390g,CAGL0I07051g,CAGL0J03960g,CAGL0J05060g,CAGL0J06006g,CAGL0K04257g,CAGL0K07634g,CAGL0K09900g,CAGL0K09922g,CAGL0L00583g,CAGL0L02453g,CAGL0L09339g,CAGL0L11990g,CAGL0M01716g,CAGL0M04807g,CAGL0M07634g,CAGL0M08800g,	4.8	1.73	1.91	0.0712277	1
GO:1900440	regulation of filamentous growth of a population of unicellular organisms in response to neutral pH	0.00620396	14	3	CAGL0K09900g,CAGL0M04807g,CAGL0M07634g,	21.4	7.67	9.66	0.0712277	1
GO:0070784	regulation of growth of unicellular organism as a thread of attached cells	0.00621195	60	6	CAGL0E04334g,CAGL0K04257g,CAGL0L02453g,CAGL0M01716g,CAGL0M04807g,CAGL0M07634g,	10	3.58	3.99	0.0712277	1
GO:0008204	ergosterol metabolic process	0.0062247	27	4	CAGL0A00429g,CAGL0E04334g,CAGL0F07865g,CAGL0K04477g,	14.8	5.3	6.19	0.0712277	1
GO:0016128	phytosteroid metabolic process	0.0062247	27	4	CAGL0A00429g,CAGL0E04334g,CAGL0F07865g,CAGL0K04477g,	14.8	5.3	6.19	0.0712277	1
GO:1901615	organic hydroxy compound metabolic process	0.00652734	100	8	CAGL0A00429g,CAGL0D05566g,CAGL0E04334g,CAGL0F07865g,CAGL0G02937g,CAGL0K04477g,CAGL0M04807g,CAGL0M12430g,	8	2.86	3.14	0.0741249	1
GO:0098655	cation transmembrane transport	0.00666319	80	7	CAGL0A00495g,CAGL0F06413g,CAGL0F08041g,CAGL0I06743g,CAGL0K12738g,CAGL0L10758g,CAGL0M05511g,	8.8	3.13	3.45	0.0747783	1
GO:1901617	organic hydroxy compound biosynthetic process	0.00673454	61	6	CAGL0A00429g,CAGL0E04334g,CAGL0F07865g,CAGL0G02937g,CAGL0K04477g,CAGL0M12430g,	9.8	3.52	3.91	0.0747783	1
GO:0010038	response to metal ion	0.00673454	61	6	CAGL0D01265g,CAGL0E03762g,CAGL0F06413g,CAGL0K07392g,CAGL0K09900g,CAGL0L09339g,	9.8	3.52	3.91	0.0747783	1
GO:1902653	secondary alcohol biosynthetic process	0.00710711	28	4	CAGL0A00429g,CAGL0E04334g,CAGL0F07865g,CAGL0K04477g,	14.3	5.11	5.93	0.0754255	1
GO:0030447	filamentous growth	0.00712385	454	22	CAGL0E03762g,CAGL0E04312g,CAGL0F00407g,CAGL0F06413g,CAGL0G08019g,CAGL0H01375g,CAGL0H07667g,CAGL0I05390g,CAGL0I09790g,CAGL0J05060g,CAGL0J11242g,CAGL0K04741g,CAGL0K07007g,CAGL0K07392g,CAGL0K09900g,CAGL0L00583g,CAGL0L02453g,CAGL0L03135g,CAGL0M01716g,CAGL0M04807g,CAGL0M07634g,CAGL0M11990g,	4.8	1.73	1.91	0.0754255	1
GO:0042402	cellular biogenic amine catabolic process	0.00733639	5	2	CAGL0F07777g,CAGL0G02937g,	40	14.32	23.5	0.0754255	1
GO:1905954	positive regulation of lipid localization	0.00733639	5	2	CAGL0F07865g,CAGL0I04246g,	40	14.32	23.5	0.0754255	1
GO:1900241	positive regulation of phenotypic switching	0.00733639	5	2	CAGL0L02453g,CAGL0M07634g,	40	14.32	23.5	0.0754255	1
GO:0032370	positive regulation of lipid transport	0.00733639	5	2	CAGL0F07865g,CAGL0I04246g,	40	14.32	23.5	0.0754255	1
GO:0009310	amine catabolic process	0.00733639	5	2	CAGL0F07777g,CAGL0G02937g,	40	14.32	23.5	0.0754255	1
GO:0006675	mannosyl-inositol phosphorylceramide metabolic process	0.00733639	5	2	CAGL0F03399g,CAGL0H01375g,	40	14.32	23.5	0.0754255	1
GO:0033217	regulation of transcription from RNA polymerase II promoter in response to iron ion starvation	0.00733639	5	2	CAGL0H03487g,CAGL0K09900g,	40	14.32	23.5	0.0754255	1
GO:0009893	positive regulation of metabolic process	0.00748819	484	23	CAGL0B03421g,CAGL0E03762g,CAGL0E04312g,CAGL0F07865g,CAGL0H03487g,CAGL0I04246g,CAGL0I05390g,CAGL0I07051g,CAGL0J03960g,CAGL0J05060g,CAGL0J06006g,CAGL0K04257g,CAGL0K07634g,CAGL0K09900g,CAGL0K09922g,CAGL0L00583g,CAGL0L02453g,CAGL0L09339g,CAGL0L11990g,CAGL0M01716g,CAGL0M04807g,CAGL0M07634g,CAGL0M08800g,	4.8	1.7	1.87	0.0754255	1
GO:0045785	positive regulation of cell adhesion	0.0075979	15	3	CAGL0L00583g,CAGL0M04807g,CAGL0M07634g,	20	7.16	8.86	0.0754255	1
GO:0071469	cellular response to alkaline pH	0.0075979	15	3	CAGL0E03762g,CAGL0E04312g,CAGL0K09900g,	20	7.16	8.86	0.0754255	1
GO:0010446	response to alkaline pH	0.0075979	15	3	CAGL0E03762g,CAGL0E04312g,CAGL0K09900g,	20	7.16	8.86	0.0754255	1
GO:0010810	regulation of cell-substrate adhesion	0.0075979	15	3	CAGL0L00583g,CAGL0M04807g,CAGL0M07634g,	20	7.16	8.86	0.0754255	1
GO:0010811	positive regulation of cell-substrate adhesion	0.0075979	15	3	CAGL0L00583g,CAGL0M04807g,CAGL0M07634g,	20	7.16	8.86	0.0754255	1
GO:0030155	regulation of cell adhesion	0.0075979	15	3	CAGL0L00583g,CAGL0M04807g,CAGL0M07634g,	20	7.16	8.86	0.0754255	1
GO:1902652	secondary alcohol metabolic process	0.00806839	29	4	CAGL0A00429g,CAGL0E04334g,CAGL0F07865g,CAGL0K04477g,	13.8	4.94	5.69	0.0790892	1
GO:0000122	negative regulation of transcription by RNA polymerase II	0.00807248	148	10	CAGL0B03421g,CAGL0C02519g,CAGL0E03762g,CAGL0H03487g,CAGL0I04246g,CAGL0I05390g,CAGL0J03960g,CAGL0K04257g,CAGL0M07634g,CAGL0M08800g,	6.8	2.42	2.63	0.0790892	1
GO:0016126	sterol biosynthetic process	0.00911128	30	4	CAGL0A00429g,CAGL0E04334g,CAGL0F07865g,CAGL0K04477g,	13.3	4.77	5.47	0.0886068	1
GO:1900461	positive regulation of pseudohyphal growth by positive regulation of transcription from RNA polymerase II promoter	0.00916214	16	3	CAGL0L02453g,CAGL0M01716g,CAGL0M07634g,	18.8	6.71	8.17	0.0886068	1
GO:0071467	cellular response to pH	0.00983605	66	6	CAGL0E03762g,CAGL0E04312g,CAGL0K09900g,CAGL0L09339g,CAGL0M04807g,CAGL0M07634g,	9.1	3.25	3.58	0.0945144	1
GO:0071248	cellular response to metal ion	0.0103641	48	5	CAGL0D01265g,CAGL0E03762g,CAGL0F06413g,CAGL0K09900g,CAGL0L09339g,	10.4	3.73	4.15	0.0989536	1
GO:0032879	regulation of localization	0.0105512	154	10	CAGL0F02387g,CAGL0F07865g,CAGL0G03179g,CAGL0H03487g,CAGL0I04246g,CAGL0I05390g,CAGL0J05060g,CAGL0J07980g,CAGL0L12892g,CAGL0M04807g,	6.5	2.32	2.52	0.0990318	1
GO:0048017	inositol lipid-mediated signaling	0.0108036	6	2	CAGL0L03135g,CAGL0L12892g,	33.3	11.93	17.62	0.0990318	1
GO:0031579	membrane raft organization	0.0108036	6	2	CAGL0E04334g,CAGL0G08624g,	33.3	11.93	17.62	0.0990318	1
GO:0071456	cellular response to hypoxia	0.0108036	6	2	CAGL0B03421g,CAGL0F07865g,	33.3	11.93	17.62	0.0990318	1
GO:0001666	response to hypoxia	0.0108036	6	2	CAGL0B03421g,CAGL0F07865g,	33.3	11.93	17.62	0.0990318	1
GO:0006687	glycosphingolipid metabolic process	0.0108036	6	2	CAGL0F03399g,CAGL0H01375g,	33.3	11.93	17.62	0.0990318	1
GO:1900437	regulation of filamentous growth of a population of unicellular organisms in response to chemical stimulus	0.0109008	17	3	CAGL0E03762g,CAGL0E04312g,CAGL0M07634g,	17.6	6.32	7.59	0.0990318	1
GO:1900741	regulation of filamentous growth of a population of unicellular organisms in response to pH	0.0109008	17	3	CAGL0K09900g,CAGL0M04807g,CAGL0M07634g,	17.6	6.32	7.59	0.0990318	1
GO:0036178	filamentous growth of a population of unicellular organisms in response to neutral pH	0.0112883	49	5	CAGL0E03762g,CAGL0F00407g,CAGL0K07007g,CAGL0M04807g,CAGL0M07634g,	10.2	3.65	4.06	0.101935	1
GO:0006694	steroid biosynthetic process	0.0114521	32	4	CAGL0A00429g,CAGL0E04334g,CAGL0F07865g,CAGL0K04477g,	12.5	4.47	5.08	0.102562	1
GO:0008610	lipid biosynthetic process	0.0114946	156	10	CAGL0A00429g,CAGL0C02189g,CAGL0E04334g,CAGL0F03399g,CAGL0F07865g,CAGL0H01375g,CAGL0H05401g,CAGL0K04477g,CAGL0K12738g,CAGL0L03135g,	6.4	2.29	2.48	0.102562	1
GO:0007154	cell communication	0.0119684	447	21	CAGL0B03421g,CAGL0C02519g,CAGL0E03762g,CAGL0F03003g,CAGL0F06413g,CAGL0G08019g,CAGL0H03487g,CAGL0H07667g,CAGL0I05390g,CAGL0I06743g,CAGL0J05060g,CAGL0J11242g,CAGL0K04741g,CAGL0K05995g,CAGL0K07634g,CAGL0K09900g,CAGL0L00583g,CAGL0L03135g,CAGL0L12892g,CAGL0M04807g,CAGL0M07634g,	4.7	1.68	1.83	0.106158	1
GO:0010035	response to inorganic substance	0.012444	90	7	CAGL0D01265g,CAGL0E03762g,CAGL0F06413g,CAGL0I01166g,CAGL0K07392g,CAGL0K09900g,CAGL0L09339g,	7.8	2.78	3.03	0.109727	1
GO:1900434	regulation of filamentous growth of a population of unicellular organisms in response to starvation	0.0127547	33	4	CAGL0F07865g,CAGL0I04246g,CAGL0K09900g,CAGL0M07634g,	12.1	4.34	4.9	0.111809	1
GO:1900443	regulation of filamentous growth of a population of unicellular organisms in response to biotic stimulus	0.0141485	34	4	CAGL0K09900g,CAGL0M01716g,CAGL0M04807g,CAGL0M07634g,	11.8	4.21	4.74	0.122593	1
GO:0002831	regulation of response to biotic stimulus	0.0141485	34	4	CAGL0K09900g,CAGL0M01716g,CAGL0M04807g,CAGL0M07634g,	11.8	4.21	4.74	0.122593	1
GO:0031670	cellular response to nutrient	0.0143951	52	5	CAGL0B03421g,CAGL0C02519g,CAGL0K07634g,CAGL0K09900g,CAGL0L00583g,	9.6	3.44	3.8	0.124013	1
GO:0035968	regulation of sterol import by regulation of transcription from RNA polymerase II promoter	0.0148495	7	2	CAGL0F07865g,CAGL0I04246g,	28.6	10.23	14.09	0.124354	1
GO:0051038	negative regulation of transcription involved in meiotic cell cycle	0.0148495	7	2	CAGL0J03960g,CAGL0K04257g,	28.6	10.23	14.09	0.124354	1
GO:0032371	regulation of sterol transport	0.0148495	7	2	CAGL0F07865g,CAGL0I04246g,	28.6	10.23	14.09	0.124354	1
GO:0072367	regulation of lipid transport by regulation of transcription from RNA polymerase II promoter	0.0148495	7	2	CAGL0F07865g,CAGL0I04246g,	28.6	10.23	14.09	0.124354	1
GO:2000909	regulation of sterol import	0.0148495	7	2	CAGL0F07865g,CAGL0I04246g,	28.6	10.23	14.09	0.124354	1
GO:0071241	cellular response to inorganic substance	0.0167579	54	5	CAGL0D01265g,CAGL0E03762g,CAGL0F06413g,CAGL0K09900g,CAGL0L09339g,	9.3	3.31	3.64	0.139556	1
GO:0000429	carbon catabolite regulation of transcription from RNA polymerase II promoter	0.0172169	36	4	CAGL0B03421g,CAGL0C02519g,CAGL0K09900g,CAGL0L00583g,	11.1	3.98	4.44	0.142586	1
GO:0044270	cellular nitrogen compound catabolic process	0.0178728	167	10	CAGL0A03905g,CAGL0C02189g,CAGL0E01243g,CAGL0F08041g,CAGL0G02937g,CAGL0H07667g,CAGL0K09922g,CAGL0L00605g,CAGL0L03846g,CAGL0L10758g,	6	2.14	2.3	0.147205	1
GO:0007584	response to nutrient	0.0180305	55	5	CAGL0B03421g,CAGL0C02519g,CAGL0K07634g,CAGL0K09900g,CAGL0L00583g,	9.1	3.25	3.57	0.147693	1
GO:0046700	heterocycle catabolic process	0.0185611	168	10	CAGL0A03905g,CAGL0C02189g,CAGL0E01243g,CAGL0F08041g,CAGL0G02937g,CAGL0H07667g,CAGL0K09922g,CAGL0L00605g,CAGL0L03846g,CAGL0L10758g,	6	2.13	2.29	0.151212	1
GO:0015846	polyamine transport	0.0194394	8	2	CAGL0G03927g,CAGL0H09152g,	25	8.95	11.74	0.157512	1
GO:2000222	positive regulation of pseudohyphal growth	0.0196552	21	3	CAGL0L02453g,CAGL0M01716g,CAGL0M07634g,	14.3	5.11	5.9	0.157557	1
GO:0000436	carbon catabolite activation of transcription from RNA polymerase II promoter	0.0196552	21	3	CAGL0B03421g,CAGL0K09900g,CAGL0L00583g,	14.3	5.11	5.9	0.157557	1
GO:0019439	aromatic compound catabolic process	0.0199961	170	10	CAGL0A03905g,CAGL0C02189g,CAGL0E01243g,CAGL0F08041g,CAGL0G02937g,CAGL0H07667g,CAGL0K09922g,CAGL0L00605g,CAGL0L03846g,CAGL0L10758g,	5.9	2.11	2.26	0.158634	1
GO:0030307	positive regulation of cell growth	0.0223022	22	3	CAGL0L02453g,CAGL0M01716g,CAGL0M07634g,	13.6	4.88	5.59	0.158634	1
GO:0048583	regulation of response to stimulus	0.022492	251	13	CAGL0A00495g,CAGL0E03762g,CAGL0E04312g,CAGL0F07865g,CAGL0G04763g,CAGL0H07667g,CAGL0I04246g,CAGL0J03256g,CAGL0K04741g,CAGL0K09900g,CAGL0M01716g,CAGL0M04807g,CAGL0M07634g,	5.2	1.85	1.99	0.158634	1
GO:0051701	interaction with host	0.0225471	39	4	CAGL0E03762g,CAGL0K04741g,CAGL0M07634g,CAGL0M12430g,	10.3	3.67	4.06	0.158634	1
GO:1901361	organic cyclic compound catabolic process	0.0231083	174	10	CAGL0A03905g,CAGL0C02189g,CAGL0E01243g,CAGL0F08041g,CAGL0G02937g,CAGL0H07667g,CAGL0K09922g,CAGL0L00605g,CAGL0L03846g,CAGL0L10758g,	5.7	2.06	2.2	0.158634	1
GO:0036177	filamentous growth of a population of unicellular organisms in response to pH	0.0237555	59	5	CAGL0E03762g,CAGL0F00407g,CAGL0K07007g,CAGL0M04807g,CAGL0M07634g,	8.5	3.03	3.3	0.158634	1
GO:0044281	small molecule metabolic process	0.0244764	598	25	CAGL0A00429g,CAGL0A00495g,CAGL0C02189g,CAGL0E04334g,CAGL0E05390g,CAGL0F02387g,CAGL0F03399g,CAGL0F07777g,CAGL0F07865g,CAGL0F08041g,CAGL0G02937g,CAGL0H01375g,CAGL0H07667g,CAGL0J00451g,CAGL0J03212g,CAGL0J04554g,CAGL0K03553g,CAGL0K04235g,CAGL0K04477g,CAGL0K12738g,CAGL0L10758g,CAGL0M04807g,CAGL0M06963g,CAGL0M12430g,CAGL0M12881g,	4.2	1.5	1.62	0.158634	1
GO:0072523	purine-containing compound catabolic process	0.0245403	9	2	CAGL0C02189g,CAGL0H07667g,	22.2	7.95	10.06	0.158634	1
GO:2000219	positive regulation of invasive growth in response to glucose limitation	0.0245403	9	2	CAGL0K04257g,CAGL0M04807g,	22.2	7.95	10.06	0.158634	1
GO:0006673	inositol phosphoceramide metabolic process	0.0245403	9	2	CAGL0F03399g,CAGL0H01375g,	22.2	7.95	10.06	0.158634	1
GO:0051716	cellular response to stimulus	0.0254427	1101	41	CAGL0B03421g,CAGL0C02519g,CAGL0D01265g,CAGL0E03762g,CAGL0E04092g,CAGL0E04312g,CAGL0E04334g,CAGL0F03003g,CAGL0F06413g,CAGL0F07865g,CAGL0G03179g,CAGL0G08019g,CAGL0H03487g,CAGL0H07667g,CAGL0I01166g,CAGL0I04246g,CAGL0I05390g,CAGL0I06743g,CAGL0J03256g,CAGL0J03960g,CAGL0J05060g,CAGL0J06006g,CAGL0J07980g,CAGL0J11242g,CAGL0K04235g,CAGL0K04741g,CAGL0K05995g,CAGL0K07634g,CAGL0K09900g,CAGL0L00583g,CAGL0L006…	3.7	1.33	1.48	0.158634	1
GO:0036244	cellular response to neutral pH	0.0266016	41	4	CAGL0E03762g,CAGL0K09900g,CAGL0M04807g,CAGL0M07634g,	9.8	3.49	3.84	0.158634	1
GO:0034404	nucleobase-containing small molecule biosynthetic process	0.0266016	41	4	CAGL0F08041g,CAGL0H07667g,CAGL0L10758g,CAGL0M12881g,	9.8	3.49	3.84	0.158634	1
GO:0065008	regulation of biological quality	0.0274956	485	21	CAGL0A00495g,CAGL0A03905g,CAGL0E01243g,CAGL0E03762g,CAGL0F06413g,CAGL0F07777g,CAGL0F08041g,CAGL0G00264g,CAGL0G08624g,CAGL0H03487g,CAGL0I06743g,CAGL0J03256g,CAGL0J05060g,CAGL0J07980g,CAGL0K04741g,CAGL0K07392g,CAGL0K09900g,CAGL0L00605g,CAGL0L10758g,CAGL0L11990g,CAGL0L12892g,	4.3	1.55	1.67	0.158634	1
GO:0015864	pyrimidine nucleoside transport	0.0279403	1	1	CAGL0F04499g,	100	35.79	inf	0.158634	1
GO:0098741	adhesion between unicellular organisms via cell-wall interaction	0.0279403	1	1	CAGL0M07634g,	100	35.79	inf	0.158634	1
GO:0006693	prostaglandin metabolic process	0.0279403	1	1	CAGL0K12738g,	100	35.79	inf	0.158634	1
GO:0110045	negative regulation of cell cycle switching, mitotic to meiotic cell cycle	0.0279403	1	1	CAGL0I05390g,	100	35.79	inf	0.158634	1
GO:0010312	detoxification of zinc ion	0.0279403	1	1	CAGL0K07392g,	100	35.79	inf	0.158634	1
GO:1902047	polyamine transmembrane transport	0.0279403	1	1	CAGL0G03927g,	100	35.79	inf	0.158634	1
GO:0015687	ferric-hydroxamate transport	0.0279403	1	1	CAGL0E04092g,	100	35.79	inf	0.158634	1
GO:0006198	cAMP catabolic process	0.0279403	1	1	CAGL0H07667g,	100	35.79	inf	0.158634	1
GO:0015682	ferric iron transport	0.0279403	1	1	CAGL0E04092g,	100	35.79	inf	0.158634	1
GO:0009214	cyclic nucleotide catabolic process	0.0279403	1	1	CAGL0H07667g,	100	35.79	inf	0.158634	1
GO:0002645	positive regulation of tolerance induction	0.0279403	1	1	CAGL0E03762g,	100	35.79	inf	0.158634	1
GO:0006787	porphyrin-containing compound catabolic process	0.0279403	1	1	CAGL0A03905g,	100	35.79	inf	0.158634	1
GO:0098704	carbohydrate import across plasma membrane	0.0279403	1	1	CAGL0A02321g,	100	35.79	inf	0.158634	1
GO:1990359	stress response to zinc ion	0.0279403	1	1	CAGL0K07392g,	100	35.79	inf	0.158634	1
GO:0097201	negative regulation of transcription from RNA polymerase II promoter in response to stress	0.0279403	1	1	CAGL0B03421g,	100	35.79	inf	0.158634	1
GO:0002643	regulation of tolerance induction	0.0279403	1	1	CAGL0E03762g,	100	35.79	inf	0.158634	1
GO:0072512	trivalent inorganic cation transport	0.0279403	1	1	CAGL0E04092g,	100	35.79	inf	0.158634	1
GO:0001516	prostaglandin biosynthetic process	0.0279403	1	1	CAGL0K12738g,	100	35.79	inf	0.158634	1
GO:0001765	membrane raft assembly	0.0279403	1	1	CAGL0G08624g,	100	35.79	inf	0.158634	1
GO:0006788	heme oxidation	0.0279403	1	1	CAGL0A03905g,	100	35.79	inf	0.158634	1
GO:0071579	regulation of zinc ion transport	0.0279403	1	1	CAGL0J05060g,	100	35.79	inf	0.158634	1
GO:0110044	regulation of cell cycle switching, mitotic to meiotic cell cycle	0.0279403	1	1	CAGL0I05390g,	100	35.79	inf	0.158634	1
GO:0120029	proton export across plasma membrane	0.0279403	1	1	CAGL0A00495g,	100	35.79	inf	0.158634	1
GO:0098708	glucose import across plasma membrane	0.0279403	1	1	CAGL0A02321g,	100	35.79	inf	0.158634	1
GO:1990120	messenger ribonucleoprotein complex assembly	0.0279403	1	1	CAGL0L03846g,	100	35.79	inf	0.158634	1
GO:0006863	purine nucleobase transport	0.0279403	1	1	CAGL0L00671g,	100	35.79	inf	0.158634	1
GO:1900390	regulation of iron ion import	0.0279403	1	1	CAGL0M04807g,	100	35.79	inf	0.158634	1
GO:1900393	regulation of iron ion transport by regulation of transcription from RNA polymerase II promoter	0.0279403	1	1	CAGL0M04807g,	100	35.79	inf	0.158634	1
GO:1900400	regulation of iron ion import by regulation of transcription from RNA polymerase II promoter	0.0279403	1	1	CAGL0M04807g,	100	35.79	inf	0.158634	1
GO:0002664	regulation of T cell tolerance induction	0.0279403	1	1	CAGL0E03762g,	100	35.79	inf	0.158634	1
GO:1900228	regulation of single-species biofilm formation in or on host organism	0.0279403	1	1	CAGL0L00583g,	100	35.79	inf	0.158634	1
GO:0006692	prostanoid metabolic process	0.0279403	1	1	CAGL0K12738g,	100	35.79	inf	0.158634	1
GO:0002666	positive regulation of T cell tolerance induction	0.0279403	1	1	CAGL0E03762g,	100	35.79	inf	0.158634	1
GO:1990539	fructose import across plasma membrane	0.0279403	1	1	CAGL0A02321g,	100	35.79	inf	0.158634	1
GO:0019482	beta-alanine metabolic process	0.0279403	1	1	CAGL0F07777g,	100	35.79	inf	0.158634	1
GO:0034759	regulation of iron ion transmembrane transport	0.0279403	1	1	CAGL0J07980g,	100	35.79	inf	0.158634	1
GO:0046498	S-adenosylhomocysteine metabolic process	0.0279403	1	1	CAGL0C02189g,	100	35.79	inf	0.158634	1
GO:0061428	negative regulation of transcription from RNA polymerase II promoter in response to hypoxia	0.0279403	1	1	CAGL0B03421g,	100	35.79	inf	0.158634	1
GO:0046149	pigment catabolic process	0.0279403	1	1	CAGL0A03905g,	100	35.79	inf	0.158634	1
GO:0015891	siderophore transport	0.0279403	1	1	CAGL0E04092g,	100	35.79	inf	0.158634	1
GO:0015862	uridine transport	0.0279403	1	1	CAGL0F04499g,	100	35.79	inf	0.158634	1
GO:0015688	iron chelate transport	0.0279403	1	1	CAGL0E04092g,	100	35.79	inf	0.158634	1
GO:0046457	prostanoid biosynthetic process	0.0279403	1	1	CAGL0K12738g,	100	35.79	inf	0.158634	1
GO:0033015	tetrapyrrole catabolic process	0.0279403	1	1	CAGL0A03905g,	100	35.79	inf	0.158634	1
GO:0010827	regulation of glucose transmembrane transport	0.0279403	1	1	CAGL0I05390g,	100	35.79	inf	0.158634	1
GO:0034465	response to carbon monoxide	0.0279403	1	1	CAGL0A03905g,	100	35.79	inf	0.158634	1
GO:0010527	positive regulation of transposition, RNA-mediated	0.0279403	1	1	CAGL0M01716g,	100	35.79	inf	0.158634	1
GO:0010768	negative regulation of transcription from RNA polymerase II promoter in response to UV-induced DNA damage	0.0279403	1	1	CAGL0C02519g,	100	35.79	inf	0.158634	1
GO:0030388	fructose 1,6-bisphosphate metabolic process	0.0279403	1	1	CAGL0L10758g,	100	35.79	inf	0.158634	1
GO:0042928	ferrichrome transport	0.0279403	1	1	CAGL0E04092g,	100	35.79	inf	0.158634	1
GO:0044148	positive regulation of growth of symbiont involved in interaction with host	0.0279403	1	1	CAGL0L00583g,	100	35.79	inf	0.158634	1
GO:0043689	cell-cell adhesion involved in flocculation	0.0279403	1	1	CAGL0M07634g,	100	35.79	inf	0.158634	1
GO:0044128	positive regulation of growth of symbiont in host	0.0279403	1	1	CAGL0L00583g,	100	35.79	inf	0.158634	1
GO:0043903	regulation of symbiosis, encompassing mutualism through parasitism	0.0279403	1	1	CAGL0L00583g,	100	35.79	inf	0.158634	1
GO:0044126	regulation of growth of symbiont in host	0.0279403	1	1	CAGL0L00583g,	100	35.79	inf	0.158634	1
GO:0042167	heme catabolic process	0.0279403	1	1	CAGL0A03905g,	100	35.79	inf	0.158634	1
GO:0034758	positive regulation of iron ion transport	0.0279403	1	1	CAGL0H03487g,	100	35.79	inf	0.158634	1
GO:0019483	beta-alanine biosynthetic process	0.0279403	1	1	CAGL0F07777g,	100	35.79	inf	0.158634	1
GO:0044718	siderophore transmembrane transport	0.0279403	1	1	CAGL0E04092g,	100	35.79	inf	0.158634	1
GO:0019510	S-adenosylhomocysteine catabolic process	0.0279403	1	1	CAGL0C02189g,	100	35.79	inf	0.158634	1
GO:0044144	modulation of growth of symbiont involved in interaction with host	0.0279403	1	1	CAGL0L00583g,	100	35.79	inf	0.158634	1
GO:0006414	translational elongation	0.0281499	24	3	CAGL0B03487g,CAGL0K04741g,CAGL0L05148g,	12.5	4.47	5.05	0.158634	1
GO:0045991	carbon catabolite activation of transcription	0.0281499	24	3	CAGL0B03421g,CAGL0K09900g,CAGL0L00583g,	12.5	4.47	5.05	0.158634	1
GO:0009636	response to toxic substance	0.0287824	42	4	CAGL0A03905g,CAGL0C02519g,CAGL0I01166g,CAGL0K07392g,	9.5	3.41	3.74	0.161591	1
GO:0043457	regulation of cellular respiration	0.0301203	10	2	CAGL0B03421g,CAGL0K09900g,	20	7.16	8.8	0.165386	1
GO:0019682	glyceraldehyde-3-phosphate metabolic process	0.0301203	10	2	CAGL0K04235g,CAGL0M06963g,	20	7.16	8.8	0.165386	1
GO:0055069	zinc ion homeostasis	0.0301203	10	2	CAGL0J05060g,CAGL0K07392g,	20	7.16	8.8	0.165386	1
GO:0006882	cellular zinc ion homeostasis	0.0301203	10	2	CAGL0J05060g,CAGL0K07392g,	20	7.16	8.8	0.165386	1
GO:0015851	nucleobase transport	0.0301203	10	2	CAGL0F04499g,CAGL0L00671g,	20	7.16	8.8	0.165386	1
GO:0006098	pentose-phosphate shunt	0.0301203	10	2	CAGL0K04235g,CAGL0M06963g,	20	7.16	8.8	0.165386	1
GO:0009166	nucleotide catabolic process	0.0313497	25	3	CAGL0F08041g,CAGL0H07667g,CAGL0L10758g,	12	4.29	4.82	0.170884	1
GO:1900436	positive regulation of filamentous growth of a population of unicellular organisms in response to starvation	0.0313497	25	3	CAGL0F07865g,CAGL0K09900g,CAGL0M07634g,	12	4.29	4.82	0.170884	1
GO:0032104	regulation of response to extracellular stimulus	0.0334547	44	4	CAGL0F07865g,CAGL0I04246g,CAGL0K09900g,CAGL0M07634g,	9.1	3.25	3.55	0.181042	1
GO:0032107	regulation of response to nutrient levels	0.0334547	44	4	CAGL0F07865g,CAGL0I04246g,CAGL0K09900g,CAGL0M07634g,	9.1	3.25	3.55	0.181042	1
GO:0030641	regulation of cellular pH	0.034732	26	3	CAGL0A00495g,CAGL0F08041g,CAGL0L10758g,	11.5	4.13	4.61	0.186607	1
GO:0051453	regulation of intracellular pH	0.034732	26	3	CAGL0A00495g,CAGL0F08041g,CAGL0L10758g,	11.5	4.13	4.61	0.186607	1
GO:0034599	cellular response to oxidative stress	0.0349658	111	7	CAGL0G03179g,CAGL0I01166g,CAGL0J07980g,CAGL0K04235g,CAGL0K09900g,CAGL0L05258g,CAGL0L11990g,	6.3	2.26	2.41	0.187192	1
GO:0032101	regulation of response to external stimulus	0.0359473	45	4	CAGL0F07865g,CAGL0I04246g,CAGL0K09900g,CAGL0M07634g,	8.9	3.18	3.46	0.188806	1
GO:0051050	positive regulation of transport	0.0359473	45	4	CAGL0F07865g,CAGL0G03179g,CAGL0H03487g,CAGL0I04246g,	8.9	3.18	3.46	0.188806	1
GO:0051037	regulation of transcription involved in meiotic cell cycle	0.0361491	11	2	CAGL0J03960g,CAGL0K04257g,	18.2	6.51	7.82	0.188806	1
GO:0051156	glucose 6-phosphate metabolic process	0.0361491	11	2	CAGL0K04235g,CAGL0M06963g,	18.2	6.51	7.82	0.188806	1
GO:0034765	regulation of ion transmembrane transport	0.0361491	11	2	CAGL0F02387g,CAGL0J07980g,	18.2	6.51	7.82	0.188806	1
GO:0006415	translational termination	0.0361491	11	2	CAGL0B03487g,CAGL0L10164g,	18.2	6.51	7.82	0.188806	1
GO:0036187	cell growth mode switching, budding to filamentous	0.0361491	11	2	CAGL0E04334g,CAGL0M07634g,	18.2	6.51	7.82	0.188806	1
GO:0048518	positive regulation of biological process	0.0363636	713	28	CAGL0A00495g,CAGL0B03421g,CAGL0E03762g,CAGL0E04312g,CAGL0F07865g,CAGL0G03179g,CAGL0H03487g,CAGL0H07667g,CAGL0I04246g,CAGL0I05390g,CAGL0I07051g,CAGL0J03960g,CAGL0J05060g,CAGL0J06006g,CAGL0K04257g,CAGL0K04741g,CAGL0K07634g,CAGL0K09900g,CAGL0K09922g,CAGL0L00583g,CAGL0L02453g,CAGL0L09339g,CAGL0L11990g,CAGL0M01716g,CAGL0M04807g,CAGL0M07634g,CAGL0M08800g,CAGL0M11990g,	3.9	1.41	1.52	0.189267	1
GO:1903506	regulation of nucleic acid-templated transcription	0.037042	591	24	CAGL0B03421g,CAGL0C02519g,CAGL0E03762g,CAGL0E04312g,CAGL0F07865g,CAGL0F07909g,CAGL0H03487g,CAGL0I04246g,CAGL0I05390g,CAGL0J03960g,CAGL0J05060g,CAGL0J06006g,CAGL0K04257g,CAGL0K07634g,CAGL0K09900g,CAGL0L00583g,CAGL0L02453g,CAGL0L09339g,CAGL0M01716g,CAGL0M04807g,CAGL0M07634g,CAGL0M08800g,CAGL0M10087g,CAGL0M11990g,	4.1	1.45	1.56	0.190811	1
GO:0006355	regulation of transcription, DNA-templated	0.037042	591	24	CAGL0B03421g,CAGL0C02519g,CAGL0E03762g,CAGL0E04312g,CAGL0F07865g,CAGL0F07909g,CAGL0H03487g,CAGL0I04246g,CAGL0I05390g,CAGL0J03960g,CAGL0J05060g,CAGL0J06006g,CAGL0K04257g,CAGL0K07634g,CAGL0K09900g,CAGL0L00583g,CAGL0L02453g,CAGL0L09339g,CAGL0M01716g,CAGL0M04807g,CAGL0M07634g,CAGL0M08800g,CAGL0M10087g,CAGL0M11990g,	4.1	1.45	1.56	0.190811	1
GO:2001141	regulation of RNA biosynthetic process	0.037042	591	24	CAGL0B03421g,CAGL0C02519g,CAGL0E03762g,CAGL0E04312g,CAGL0F07865g,CAGL0F07909g,CAGL0H03487g,CAGL0I04246g,CAGL0I05390g,CAGL0J03960g,CAGL0J05060g,CAGL0J06006g,CAGL0K04257g,CAGL0K07634g,CAGL0K09900g,CAGL0L00583g,CAGL0L02453g,CAGL0L09339g,CAGL0M01716g,CAGL0M04807g,CAGL0M07634g,CAGL0M08800g,CAGL0M10087g,CAGL0M11990g,	4.1	1.45	1.56	0.190811	1
GO:0006629	lipid metabolic process	0.0377564	270	13	CAGL0A00429g,CAGL0C02189g,CAGL0D05566g,CAGL0E04334g,CAGL0F03399g,CAGL0F07865g,CAGL0H01375g,CAGL0H03487g,CAGL0H05401g,CAGL0K04477g,CAGL0K05995g,CAGL0K12738g,CAGL0L03135g,	4.8	1.72	1.83	0.193825	1
GO:0052200	response to host defenses	0.0382955	27	3	CAGL0E03762g,CAGL0K04741g,CAGL0M07634g,	11.1	3.98	4.42	0.195255	1
GO:0075136	response to host	0.0382955	27	3	CAGL0E03762g,CAGL0K04741g,CAGL0M07634g,	11.1	3.98	4.42	0.195255	1
GO:0005975	carbohydrate metabolic process	0.0391125	190	10	CAGL0F03003g,CAGL0F08041g,CAGL0G00308g,CAGL0H09130g,CAGL0J00451g,CAGL0K04235g,CAGL0L10758g,CAGL0M04807g,CAGL0M06963g,CAGL0M12430g,	5.3	1.88	2	0.198744	1
GO:0034220	ion transmembrane transport	0.0411786	115	7	CAGL0A00495g,CAGL0F06413g,CAGL0F08041g,CAGL0I06743g,CAGL0K12738g,CAGL0L10758g,CAGL0M05511g,	6.1	2.18	2.32	0.207993	1
GO:0015672	monovalent inorganic cation transport	0.0412473	47	4	CAGL0A00495g,CAGL0F02387g,CAGL0F08041g,CAGL0L10758g,	8.5	3.05	3.3	0.207993	1
GO:0006885	regulation of pH	0.0420381	28	3	CAGL0A00495g,CAGL0F08041g,CAGL0L10758g,	10.7	3.83	4.24	0.207993	1
GO:1901292	nucleoside phosphate catabolic process	0.0420381	28	3	CAGL0F08041g,CAGL0H07667g,CAGL0L10758g,	10.7	3.83	4.24	0.207993	1
GO:0031589	cell-substrate adhesion	0.0420381	28	3	CAGL0L00583g,CAGL0M07634g,CAGL0M12430g,	10.7	3.83	4.24	0.207993	1
GO:0052509	positive regulation by symbiont of host defense response	0.0425975	12	2	CAGL0E03762g,CAGL0K04741g,	16.7	5.97	7.04	0.207993	1
GO:0031349	positive regulation of defense response	0.0425975	12	2	CAGL0E03762g,CAGL0K04741g,	16.7	5.97	7.04	0.207993	1
GO:1900442	positive regulation of filamentous growth of a population of unicellular organisms in response to neutral pH	0.0425975	12	2	CAGL0M04807g,CAGL0M07634g,	16.7	5.97	7.04	0.207993	1
GO:0036164	cell-abiotic substrate adhesion	0.0425975	12	2	CAGL0L00583g,CAGL0M12430g,	16.7	5.97	7.04	0.207993	1
GO:0052251	induction by organism of defense response of other organism involved in symbiotic interaction	0.0425975	12	2	CAGL0E03762g,CAGL0K04741g,	16.7	5.97	7.04	0.207993	1
GO:0044416	induction by symbiont of host defense response	0.0425975	12	2	CAGL0E03762g,CAGL0K04741g,	16.7	5.97	7.04	0.207993	1
GO:0052510	positive regulation by organism of defense response of other organism involved in symbiotic interaction	0.0425975	12	2	CAGL0E03762g,CAGL0K04741g,	16.7	5.97	7.04	0.207993	1
GO:0016053	organic acid biosynthetic process	0.046102	169	9	CAGL0F03399g,CAGL0F07777g,CAGL0F08041g,CAGL0H01375g,CAGL0J03212g,CAGL0K03553g,CAGL0K04477g,CAGL0K12738g,CAGL0L10758g,	5.3	1.91	2.02	0.223647	1
GO:0046394	carboxylic acid biosynthetic process	0.046102	169	9	CAGL0F03399g,CAGL0F07777g,CAGL0F08041g,CAGL0H01375g,CAGL0J03212g,CAGL0K03553g,CAGL0K04477g,CAGL0K12738g,CAGL0L10758g,	5.3	1.91	2.02	0.223647	1
GO:0080134	regulation of response to stress	0.0462839	118	7	CAGL0E03762g,CAGL0F07865g,CAGL0I04246g,CAGL0J03256g,CAGL0K04741g,CAGL0K09900g,CAGL0M07634g,	5.9	2.12	2.25	0.223805	1
GO:0031347	regulation of defense response	0.0494379	13	2	CAGL0E03762g,CAGL0K04741g,	15.4	5.51	6.4	0.22693	1
GO:0051187	cofactor catabolic process	0.0494379	13	2	CAGL0A03905g,CAGL0C02189g,	15.4	5.51	6.4	0.22693	1
GO:0044070	regulation of anion transport	0.0494379	13	2	CAGL0F02387g,CAGL0L12892g,	15.4	5.51	6.4	0.22693	1

## Sheet: Group 6
Supplementary file 2: List of GO-terms enriched from temporally induced genes in wildtype C. glabrata in response to macrophage infection
	GO-Term enrichment employing Candida genome database
GOID	GO_term	Corrected P-value	Cluster frequency	Background frequency	False discovery rate	Gene(s) annotated to the term	Directly Annotated GOID List
55065	metal ion homeostasis	4.41e-05	16 out of 195 genes, 8.2%	91 out of 5615 background genes, 1.6%	0	CAGL0C03333g:SOD1:CAGL0D03322g:CAGL0E01969g:CAGL0F06831g:CAGL0G04631g:GRX4:CAGL0I07491g:CAGL0I08767g:CAGL0K07315g:AP5:ENA1:CAGL0L07810g:CAGL0M06457g:CAGL0M07942g:CAGL0M08602g	10723:71421:61419:1320:30036:43324:6813:61399:45944:15677:33215:2000678:31939:36086:36091:6801:48255:1901856:55085:6828:55072:9268:45454:30007:2182:30466:6882:97623:70417:51208:10106:6876:34599:55114:6468:15691:55078:31065:122:42149:1903026:6826:6875:50821:30026:9651:31505:32468:6874:60003:6814:6879:6883:51091:70588:33617:6880:6878:6825:6972
43043	peptide biosynthetic process	8.99e-05	40 out of 195 genes, 20.5%	485 out of 5615 background genes, 8.6%	0	CAGL0A03168g:CAGL0A03278g:CAGL0B03927g:CAGL0D05214g:CAGL0E01991g:CAGL0E03289g:CAGL0F01683g:CAGL0G00154g:CAGL0G02079g:CAGL0G02475g:CAGL0G05027g:CAGL0G06490g:CAGL0G06776g:CAGL0G07227g:CAGL0G08734g:CAGL0G09713g:CAGL0H00462g:CAGL0H00957g:CAGL0H05511g:CAGL0H08734g:CAGL0H09372g:CAGL0I00814g:CAGL0I08767g:CAGL0I09240g:CAGL0J05258g:CAGL0J06374g:CAGL0J07678g:CAGL0J09086g:CAGL0K00671g:CAGL0K03135g:GSH1:CAGL…	51083:6413:2000640:6750:16567:6414:55:1902280:27:32543:28:463:1901195:42274:55072:447:2182:9097:462:42254:6452:6364:2181:34063:16070:6412:45903:6437:6606:1990145:45860:71585:1731:42542:42273:18016:6407:6450:46686:71456:54
55082	cellular chemical homeostasis	9.1e-05	19 out of 195 genes, 9.7%	134 out of 5615 background genes, 2.4%	0	CAGL0A04829g:CAGL0C03333g:SOD1:CAGL0D03322g:CAGL0E01969g:GLK1:CAGL0F06831g:CAGL0G04631g:CAGL0G06138g:GRX4:CAGL0I07491g:CAGL0K07315g:AP5:ENA1:CAGL0L07810g:CBF3D:CAGL0M06457g:CAGL0M07942g:CAGL0M08602g	6096:2000766:10255:6006:5975:1320:30036:6813:61399:45944:15677:33215:921:2000678:51156:31939:36086:6801:6013:1901856:6002:55085:9268:45454:30007:6882:70417:10106:6876:55114:6468:15691:902:55078:7035:42149:50821:30026:43254:712:31505:6814:70588:6880:6825:86:6972:10723:71421:46323:61419:43324:6511:6000:82:34622:31146:36091:48255:6828:45116:30466:97623:51208:34599:6998:30163:31065:122:1903026:6826:9…
6412	translation	0.00022	39 out of 195 genes, 20.0%	482 out of 5615 background genes, 8.6%	0	CAGL0A03168g:CAGL0A03278g:CAGL0B03927g:CAGL0D05214g:CAGL0E01991g:CAGL0E03289g:CAGL0F01683g:CAGL0G00154g:CAGL0G02079g:CAGL0G02475g:CAGL0G05027g:CAGL0G06490g:CAGL0G06776g:CAGL0G07227g:CAGL0G08734g:CAGL0G09713g:CAGL0H00462g:CAGL0H00957g:CAGL0H05511g:CAGL0H08734g:CAGL0H09372g:CAGL0I00814g:CAGL0I08767g:CAGL0I09240g:CAGL0J05258g:CAGL0J06374g:CAGL0J07678g:CAGL0J09086g:CAGL0K00671g:CAGL0K03135g:CAGL0L048…	51083:6413:2000640:55:1902280:27:463:1901195:42274:55072:447:2182:9097:462:42254:6437:1990145:1731:18016:6450:54:16567:6414:32543:28:6452:6364:2181:34063:16070:6412:45903:6606:45860:42273:6407:71456
19725	cellular homeostasis	0.00122	20 out of 195 genes, 10.3%	173 out of 5615 background genes, 3.1%	0	CAGL0A04829g:CAGL0C03333g:SOD1:CAGL0D03322g:CAGL0E01969g:GLK1:CAGL0F06831g:CAGL0G04631g:CAGL0G06138g:GRX4:CAGL0I07491g:TSA1:CAGL0K07315g:AP5:ENA1:CAGL0L07810g:CBF3D:CAGL0M06457g:CAGL0M07942g:CAGL0M08602g	6096:2000766:10255:6006:5975:1320:30036:6813:61399:45944:15677:33215:921:2000678:51156:31939:36086:6801:6013:1901856:6002:55085:9268:45454:30007:6882:70417:10106:6876:55114:6468:15691:902:55078:7035:42149:50821:30026:43254:712:31505:6814:70588:6880:6825:86:6972:10723:42744:6457:71421:46323:61419:43324:6511:6000:82:34622:31146:36091:48255:6828:45116:30466:97623:51208:34599:6998:30163:31065:122:434…
44271	cellular nitrogen compound biosynthetic process	0.00034	60 out of 195 genes, 30.8%	935 out of 5615 background genes, 16.7%	0	TRP5:CAGL0A03168g:CAGL0A03278g:CAGL0B02453g:CAGL0B03927g:CAGL0D05214g:CAGL0E01155g:CAGL0E01991g:CAGL0E02761g:CAGL0E03289g:CAGL0E05566g:CAGL0F01683g:HPT1:CAGL0F08503g:CAGL0G00154g:CAGL0G02079g:CAGL0G02475g:CAGL0G05027g:CAGL0G06490g:CAGL0G06776g:CAGL0G06974g:APT1:CAGL0G07227g:CAGL0G08734g:CAGL0G09691g:CAGL0G09713g:CAGL0H00462g:CAGL0H00957g:CAGL0H05511g:CAGL0H08541g:CAGL0H08734g:CAGL0H09372g:CAGL0I0…	51083:9116:6006:6543:6413:2000640:162:45144:55:1902280:27:6337:463:6281:1901195:42274:1903778:55072:46654:42797:447:9070:6168:2182:6348:9097:6338:70791:462:6207:42254:55114:6310:9113:6437:1990145:1731:18016:6450:6529:46686:54:6526:6564:6360:6368:6783:1195:71590:6383:6750:9396:16567:44209:6414:6164:32543:1904263:28:6817:6311:6355:6351:70898:6366:45821:6452:32263:6364:2181:70409:34063:16070:6412:45…
1901576	organic substance biosynthetic process	0.01649	75 out of 195 genes, 38.5%	1418 out of 5615 background genes, 25.3%	0.0018	TRP5:CAGL0A03168g:CAGL0A03278g:CAGL0B02453g:CAGL0B03014g:CAGL0B03927g:CAGL0C01573g:CAGL0D00176g:NCP1:CAGL0D05214g:ERG1:CAGL0E01155g:CAGL0E01991g:CAGL0E02761g:CAGL0E03289g:CAGL0E05566g:CAGL0F00759g:CAGL0F01683g:ERG3:HPT1:CAGL0F08503g:BAT1:CAGL0G00154g:CAGL0G02079g:CAGL0G02475g:CAGL0G05027g:CAGL0G06490g:CAGL0G06776g:CAGL0G06974g:APT1:CAGL0G07227g:CAGL0G08734g:CAGL0G09691g:CAGL0G09713g:CAGL0H00462g:…	51083:10142:9116:6006:6543:6413:2000640:162:45144:9073:8298:55:1902280:30447:27:6084:6337:36267:463:6281:1901195:42274:6567:1903778:55072:46654:42797:19878:447:9070:6168:6116:2182:6348:9097:6338:70791:462:6207:42254:6486:55114:1905897:6537:6310:9113:6437:1990145:45048:7568:9085:51321:1731:31505:18016:6450:7088:6529:9082:46686:54:6526:6564:6360:6368:6783:1195:71590:6383:6750:35269:9396:9058:16567:…
6875	cellular metal ion homeostasis	6.7e-05	15 out of 195 genes, 7.7%	82 out of 5615 background genes, 1.5%	0	CAGL0C03333g:SOD1:CAGL0D03322g:CAGL0E01969g:CAGL0F06831g:CAGL0G04631g:GRX4:CAGL0I07491g:CAGL0K07315g:AP5:ENA1:CAGL0L07810g:CAGL0M06457g:CAGL0M07942g:CAGL0M08602g	10723:71421:61419:1320:30036:43324:6813:61399:45944:15677:33215:2000678:31939:36086:6801:36091:48255:1901856:55085:6828:9268:45454:30007:30466:6882:97623:70417:51208:10106:6876:34599:55114:6468:15691:55078:31065:122:42149:1903026:6826:6875:50821:30026:9651:31505:32468:6874:60003:6814:6879:6883:51091:70588:33617:6880:6825:6878:6972
55076	transition metal ion homeostasis	7.53e-05	13 out of 195 genes, 6.7%	61 out of 5615 background genes, 1.1%	0	CAGL0C03333g:SOD1:CAGL0D03322g:CAGL0E01969g:CAGL0F06831g:CAGL0G04631g:GRX4:CAGL0I07491g:CAGL0I08767g:CAGL0K07315g:AP5:CAGL0M06457g:CAGL0M08602g	10723:71421:61419:1320:30036:43324:61399:45944:15677:33215:2000678:31939:36086:6801:36091:48255:1901856:55085:6828:55072:45454:2182:30466:6882:70417:10106:6876:34599:55114:15691:31065:122:1903026:6826:50821:30026:31505:32468:6874:60003:6879:51091:70588:33617:6880:6825:6878
43604	amide biosynthetic process	8.64e-05	42 out of 195 genes, 21.5%	523 out of 5615 background genes, 9.3%	0	CAGL0A03168g:CAGL0A03278g:CAGL0B03927g:CAGL0D05214g:CAGL0E01991g:CAGL0E03289g:CAGL0F01683g:CAGL0F08503g:CAGL0G00154g:CAGL0G02079g:CAGL0G02475g:CAGL0G05027g:CAGL0G06490g:CAGL0G06776g:CAGL0G07227g:CAGL0G08734g:CAGL0G09713g:CAGL0H00462g:CAGL0H00957g:CAGL0H05511g:CAGL0H08734g:CAGL0H09372g:CAGL0I00814g:CAGL0I08767g:CAGL0I09240g:ASN2:CAGL0J05258g:CAGL0J06374g:CAGL0J07678g:CAGL0J09086g:CAGL0K00671g:CAGL…	51083:6413:2000640:6750:9396:16567:6414:55:1902280:27:32543:28:463:1901195:42274:55072:46654:447:2182:9097:462:42254:6452:6364:2181:34063:16070:6412:45903:6437:6606:1990145:45860:71585:1731:42542:42273:18016:6407:6450:6529:46686:71456:54
6518	peptide metabolic process	9.36e-05	41 out of 195 genes, 21.0%	505 out of 5615 background genes, 9.0%	0	CAGL0A03168g:CAGL0A03278g:CAGL0B03927g:CAGL0D05214g:CAGL0E01991g:CAGL0E03289g:CAGL0F01683g:CAGL0G00154g:CAGL0G02079g:CAGL0G02475g:CAGL0G05027g:CAGL0G06490g:CAGL0G06776g:CAGL0G07227g:CAGL0G08734g:CAGL0G09713g:CAGL0H00462g:CAGL0H00957g:CAGL0H05511g:CAGL0H08734g:CAGL0H09372g:CAGL0I00814g:CAGL0I08767g:CAGL0I09240g:CAGL0J05258g:CAGL0J06374g:CAGL0J07678g:CAGL0J09086g:DUG3:CAGL0K00671g:CAGL0K03135g:GSH1…	51083:6413:2000640:55:1902280:27:463:1901195:42274:55072:447:2182:9097:462:42254:6437:1990145:1731:18016:6450:46686:54:6750:16567:6414:32543:28:6452:6364:2181:34063:16070:6412:45903:6606:45860:71585:42542:42273:6407:6751:71456
43603	cellular amide metabolic process	0.0001	44 out of 195 genes, 22.6%	566 out of 5615 background genes, 10.1%	0	CAGL0A03168g:CAGL0A03278g:CAGL0B03927g:CAGL0D05214g:CAGL0E01991g:CAGL0E03289g:CAGL0F01683g:CAGL0F08503g:CAGL0G00154g:CAGL0G02079g:CAGL0G02475g:CAGL0G05027g:CAGL0G06490g:CAGL0G06776g:CAGL0G07227g:CAGL0G08734g:CAGL0G09713g:CAGL0H00462g:CAGL0H00957g:ERG13:CAGL0H05511g:CAGL0H08734g:CAGL0H09372g:CAGL0I00814g:CAGL0I08767g:CAGL0I09240g:ASN2:CAGL0J05258g:CAGL0J06374g:CAGL0J07678g:CAGL0J09086g:DUG3:CAGL0K…	51083:10142:6413:2000640:55:1902280:27:6084:463:1901195:42274:55072:46654:447:2182:9097:462:42254:6437:1990145:1731:18016:6450:6529:46686:54:6750:9396:16567:6414:32543:6696:28:6452:6364:2181:34063:16070:6412:45903:6606:45860:71585:42542:42273:6407:6751:71456
1901566	organonitrogen compound biosynthetic process	0.00015	59 out of 195 genes, 30.3%	892 out of 5615 background genes, 15.9%	0	TRP5:CAGL0A03168g:CAGL0A03278g:CAGL0B03014g:CAGL0B03927g:CAGL0C01573g:CAGL0D00176g:CAGL0D05214g:CAGL0E01991g:CAGL0E03289g:CAGL0F00759g:CAGL0F01683g:HPT1:CAGL0F08503g:BAT1:CAGL0G00154g:CAGL0G02079g:CAGL0G02475g:CAGL0G05027g:CAGL0G06490g:CAGL0G06776g:APT1:CAGL0G07227g:CAGL0G08734g:CAGL0G09691g:CAGL0G09713g:CAGL0H00462g:CAGL0H00957g:CAGL0H05511g:CAGL0H08734g:CAGL0H09372g:ARO3:CAGL0I00814g:CAGL0I0876…	51083:9116:6006:6543:6413:2000640:162:9073:8298:55:1902280:27:36267:463:1901195:42274:55072:46654:19878:447:9070:6168:2182:9097:70791:462:6207:42254:6486:55114:6537:9113:6437:1990145:45048:9085:51321:1731:18016:6450:7088:6529:9082:46686:54:6526:6564:6783:71590:6750:35269:9396:9058:16567:19676:44209:6414:6164:32543:28:6452:32263:6364:2181:70409:34063:16070:6412:45903:9083:32264:6606:6106:7165:4586…
48878	chemical homeostasis	0.00022	20 out of 195 genes, 10.3%	156 out of 5615 background genes, 2.8%	0	CAGL0A04829g:CAGL0C03333g:SOD1:CAGL0D03322g:CAGL0E01969g:GLK1:CAGL0F06831g:CAGL0G04631g:CAGL0G06138g:GRX4:CAGL0I07491g:CAGL0I08767g:CAGL0K07315g:AP5:ENA1:CAGL0L07810g:CBF3D:CAGL0M06457g:CAGL0M07942g:CAGL0M08602g	6096:2000766:10255:6006:5975:1320:30036:6813:61399:45944:15677:33215:921:2000678:51156:31939:36086:6801:6013:1901856:6002:55085:55072:9268:45454:30007:2182:6882:70417:10106:6876:55114:6468:15691:902:55078:7035:42149:50821:30026:43254:712:31505:6814:70588:6880:6825:86:6972:10723:71421:46323:61419:43324:6511:6000:82:34622:31146:36091:48255:6828:45116:30466:97623:51208:34599:6998:30163:31065:122:190…
98771	inorganic ion homeostasis	0.00023	17 out of 195 genes, 8.7%	115 out of 5615 background genes, 2.0%	0	CAGL0C03333g:SOD1:CAGL0D03322g:CAGL0E01969g:CAGL0F06831g:CAGL0G04631g:GRX4:CAGL0I07491g:CAGL0I08767g:CAGL0K07315g:AP5:ENA1:CAGL0L07810g:CBF3D:CAGL0M06457g:CAGL0M07942g:CAGL0M08602g	2000766:1320:30036:6813:61399:45944:15677:33215:921:2000678:31939:36086:6801:1901856:55085:55072:9268:45454:30007:2182:6882:70417:10106:6876:55114:6468:15691:55078:7035:42149:50821:30026:43254:712:31505:6814:70588:6880:6825:86:6972:10723:71421:61419:43324:6511:82:34622:31146:36091:48255:6828:45116:30466:97623:51208:34599:6998:30163:31065:122:1903026:6826:6875:10458:51382:9651:32468:60542:6874:600…
46916	cellular transition metal ion homeostasis	0.00033	12 out of 195 genes, 6.2%	58 out of 5615 background genes, 1.0%	0	CAGL0C03333g:SOD1:CAGL0D03322g:CAGL0E01969g:CAGL0F06831g:CAGL0G04631g:GRX4:CAGL0I07491g:CAGL0K07315g:AP5:CAGL0M06457g:CAGL0M08602g	1320:30036:61399:45944:15677:33215:2000678:31939:36086:6801:1901856:55085:45454:6882:70417:10106:6876:55114:15691:50821:30026:31505:70588:6880:6825:10723:71421:61419:43324:36091:48255:6828:30466:34599:31065:122:1903026:6826:32468:6874:60003:6879:51091:33617:6878
55080	cation homeostasis	0.00034	17 out of 195 genes, 8.7%	118 out of 5615 background genes, 2.1%	0	CAGL0C03333g:SOD1:CAGL0D03322g:CAGL0E01969g:CAGL0F06831g:CAGL0G04631g:GRX4:CAGL0I07491g:CAGL0I08767g:CAGL0K07315g:AP5:ENA1:CAGL0L07810g:CBF3D:CAGL0M06457g:CAGL0M07942g:CAGL0M08602g	2000766:1320:30036:6813:61399:45944:15677:33215:921:2000678:31939:36086:6801:1901856:55085:55072:9268:45454:30007:2182:6882:70417:10106:6876:55114:6468:15691:55078:7035:42149:50821:30026:43254:712:31505:6814:70588:6880:6825:86:6972:10723:71421:61419:43324:6511:82:34622:31146:36091:48255:6828:45116:30466:97623:51208:34599:6998:30163:31065:122:1903026:6826:6875:10458:51382:9651:32468:60542:6874:600…
30003	cellular cation homeostasis	0.00045	16 out of 195 genes, 8.2%	107 out of 5615 background genes, 1.9%	0	CAGL0C03333g:SOD1:CAGL0D03322g:CAGL0E01969g:CAGL0F06831g:CAGL0G04631g:GRX4:CAGL0I07491g:CAGL0K07315g:AP5:ENA1:CAGL0L07810g:CBF3D:CAGL0M06457g:CAGL0M07942g:CAGL0M08602g	2000766:1320:30036:6813:61399:45944:15677:33215:921:2000678:31939:36086:6801:1901856:55085:9268:45454:30007:6882:70417:10106:6876:55114:6468:15691:55078:7035:42149:50821:30026:43254:712:31505:6814:70588:6880:6825:86:6972:10723:71421:61419:43324:6511:82:34622:31146:36091:48255:6828:45116:30466:97623:51208:34599:6998:30163:31065:122:1903026:6826:6875:10458:51382:9651:32468:60542:6874:60003:101026:6…
6873	cellular ion homeostasis	0.00121	16 out of 195 genes, 8.2%	115 out of 5615 background genes, 2.0%	0	CAGL0C03333g:SOD1:CAGL0D03322g:CAGL0E01969g:CAGL0F06831g:CAGL0G04631g:GRX4:CAGL0I07491g:CAGL0K07315g:AP5:ENA1:CAGL0L07810g:CBF3D:CAGL0M06457g:CAGL0M07942g:CAGL0M08602g	2000766:1320:30036:6813:61399:45944:15677:33215:921:2000678:31939:36086:6801:1901856:55085:9268:45454:30007:6882:70417:10106:6876:55114:6468:15691:55078:7035:42149:50821:30026:43254:712:31505:6814:70588:6880:6825:86:6972:10723:71421:61419:43324:6511:82:34622:31146:36091:48255:6828:45116:30466:97623:51208:34599:6998:30163:31065:122:1903026:6826:6875:10458:51382:9651:32468:60542:6874:60003:101026:6…
50801	ion homeostasis	0.00123	17 out of 195 genes, 8.7%	129 out of 5615 background genes, 2.3%	0	CAGL0C03333g:SOD1:CAGL0D03322g:CAGL0E01969g:CAGL0F06831g:CAGL0G04631g:GRX4:CAGL0I07491g:CAGL0I08767g:CAGL0K07315g:AP5:ENA1:CAGL0L07810g:CBF3D:CAGL0M06457g:CAGL0M07942g:CAGL0M08602g	2000766:1320:30036:6813:61399:45944:15677:33215:921:2000678:31939:36086:6801:1901856:55085:55072:9268:45454:30007:2182:6882:70417:10106:6876:55114:6468:15691:55078:7035:42149:50821:30026:43254:712:31505:6814:70588:6880:6825:86:6972:10723:71421:61419:43324:6511:82:34622:31146:36091:48255:6828:45116:30466:97623:51208:34599:6998:30163:31065:122:1903026:6826:6875:10458:51382:9651:32468:60542:6874:600…
44249	cellular biosynthetic process	0.00256	77 out of 195 genes, 39.5%	1401 out of 5615 background genes, 25.0%	0	TRP5:CAGL0A03168g:CAGL0A03278g:CAGL0B02453g:CAGL0B03014g:CAGL0B03927g:CAGL0C01573g:CAGL0D00176g:NCP1:CAGL0D05214g:ERG1:CAGL0E01155g:CAGL0E01991g:CAGL0E02761g:CAGL0E03289g:ISA1:CAGL0E05566g:CAGL0F00759g:CAGL0F01683g:ERG3:HPT1:CAGL0F08503g:BAT1:CAGL0G00154g:CAGL0G02079g:CAGL0G02475g:CAGL0G05027g:CAGL0G06490g:CAGL0G06776g:CAGL0G06974g:APT1:CAGL0G07227g:CAGL0G08734g:CAGL0G09691g:CAGL0G09713g:CAGL0H00…	51083:10142:9116:6006:6543:6413:2000640:97428:162:45144:9073:8298:55:1902280:30447:27:6084:6337:36267:463:6281:1901195:42274:6567:1903778:55072:46654:42797:19878:447:9070:6168:6116:2182:6348:9097:6338:70791:462:6207:42254:6486:55114:1905897:6537:6310:9113:6437:1990145:45048:7568:9085:51321:1731:31505:18016:6450:7088:6529:9082:16226:46686:54:6526:6564:6360:6368:6783:1195:71590:6383:6750:35269:9396…
9058	biosynthetic process	0.00564	78 out of 195 genes, 40.0%	1454 out of 5615 background genes, 25.9%	0	TRP5:CAGL0A03168g:CAGL0A03278g:CAGL0B02453g:CAGL0B03014g:CAGL0B03927g:CAGL0C01573g:CAGL0D00176g:NCP1:CAGL0D05214g:ERG1:CAGL0E01155g:CAGL0E01991g:CAGL0E02761g:CAGL0E03289g:ISA1:CAGL0E05566g:CAGL0F00759g:CAGL0F01683g:ERG3:HPT1:CAGL0F08503g:BAT1:CAGL0G00154g:ARO8:CAGL0G02079g:CAGL0G02475g:CAGL0G05027g:CAGL0G06490g:CAGL0G06776g:CAGL0G06974g:APT1:CAGL0G07227g:CAGL0G08734g:CAGL0G09691g:CAGL0G09713g:CAG…	51083:10142:9116:6006:6543:6413:2000640:97428:162:45144:9073:8298:55:1902280:30447:27:6084:6337:36267:463:6281:1901195:42274:6567:1903778:55072:46654:42797:19878:447:9070:6168:6116:2182:6348:9097:6338:70791:462:6207:42254:6486:55114:1905897:6537:6310:9113:6437:1990145:45048:7568:9085:51321:1731:31505:18016:6450:7088:6529:9082:16226:46686:54:6526:6564:6360:6368:6783:1195:71590:6383:6750:35269:9396…
72503	cellular divalent inorganic cation homeostasis	0.02413	7 out of 195 genes, 3.6%	28 out of 5615 background genes, 0.5%	0.0017	SOD1:CAGL0D03322g:CAGL0E01969g:CAGL0G04631g:CAGL0I07491g:ENA1:CAGL0M06457g	1320:6813:6801:1901856:55085:9268:45454:6882:6876:55114:15691:55078:42149:50821:30026:31505:6814:70588:6825:6972:71421:36091:6828:97623:51208:34599:6826:9651:32468:6874:6883:51091:6878
42592	homeostatic process	0.0609	22 out of 195 genes, 11.3%	261 out of 5615 background genes, 4.6%	0.0025	CAGL0A04829g:CAGL0C03333g:SOD1:CAGL0D02926g:CAGL0D03322g:CAGL0E01969g:GLK1:CAGL0F06831g:CAGL0G04631g:CAGL0G06138g:GRX4:CAGL0I07491g:CAGL0I08767g:TSA1:CAGL0K07315g:AP5:ENA1:CAGL0L07810g:CBF3D:CAGL0M06457g:CAGL0M07942g:CAGL0M08602g	6096:2000766:10255:6006:5975:1320:30036:51568:723:6813:61399:45944:15677:33215:921:2000678:51156:31939:36086:6801:6013:1901856:6002:55085:55072:9268:45454:30007:2182:6348:6882:70417:10106:6876:55114:6468:15691:902:55078:7035:42149:50821:30026:43254:712:31505:6814:70588:6880:6825:86:6972:10723:42744:6457:71421:46323:61419:43324:6511:6000:82:34622:31146:36091:48255:6828:45116:30466:97623:51208:3459…
72507	divalent inorganic cation homeostasis	0.07512	7 out of 195 genes, 3.6%	33 out of 5615 background genes, 0.6%	0.0024	SOD1:CAGL0D03322g:CAGL0E01969g:CAGL0G04631g:CAGL0I07491g:ENA1:CAGL0M06457g	1320:6813:6801:1901856:55085:9268:45454:6882:6876:55114:15691:55078:42149:50821:30026:31505:6814:70588:6825:6972:71421:36091:6828:97623:51208:34599:6826:9651:32468:6874:6883:51091:6878
	GO-Term enrichment employing FungiDB database
ID	Name	P-value	Bgd count	Result count	Result gene list	Pct of bgd	Fold enrichment	Odds ratio	Benjamini	Bonferroni
GO:0001666	response to hypoxia	0.000905133	6	3	CAGL0E05566g,CAGL0F06831g,CAGL0L04840g,	50	13.58	26.56	0.037563	1
GO:0010467	gene expression	0.00148882	955	52	CAGL0A03168g,CAGL0A03278g,CAGL0B02453g,CAGL0B03927g,CAGL0D05214g,CAGL0E01155g,CAGL0E01991g,CAGL0E02761g,CAGL0E03289g,CAGL0E03652g,CAGL0E05566g,CAGL0F01683g,CAGL0G00154g,CAGL0G02079g,CAGL0G02475g,CAGL0G05027g,CAGL0G06490g,CAGL0G06776g,CAGL0G06974g,CAGL0G07227g,CAGL0G08734g,CAGL0G09713g,CAGL0H00462g,CAGL0H00957g,CAGL0H05511g,CAGL0H08541g,CAGL0H08734g,CAGL0H09372g,CAGL0I00308g,CAGL0I00814g,CAGL0I013…	5.4	1.48	1.69	0.0565289	1
GO:0097384	cellular lipid biosynthetic process	0.00224695	26	5	CAGL0D04114g,CAGL0D05940g,CAGL0F01793g,CAGL0H04081g,CAGL0M07656g,	19.2	5.22	6.37	0.0723152	1
GO:0006696	ergosterol biosynthetic process	0.00224695	26	5	CAGL0D04114g,CAGL0D05940g,CAGL0F01793g,CAGL0H04081g,CAGL0M07656g,	19.2	5.22	6.37	0.0723152	1
GO:0008652	cellular amino acid biosynthetic process	0.00325997	99	10	CAGL0A01430g,CAGL0C01573g,CAGL0D00176g,CAGL0F09207g,CAGL0G09691g,CAGL0H10142g,CAGL0I09592g,CAGL0I10648g,CAGL0K10978g,CAGL0M12386g,	10.1	2.74	3.04	0.0912555	1
GO:0042254	ribosome biogenesis	0.00734559	282	19	CAGL0E01991g,CAGL0E03289g,CAGL0F06809g,CAGL0G00154g,CAGL0G02475g,CAGL0G05027g,CAGL0G06490g,CAGL0G07227g,CAGL0H00462g,CAGL0H05511g,CAGL0I03234g,CAGL0J00957g,CAGL0J09086g,CAGL0K00671g,CAGL0K03135g,CAGL0L04840g,CAGL0M00814g,CAGL0M04873g,CAGL0M06501g,	6.7	1.83	1.99	0.140632	1
GO:1904659	glucose transmembrane transport	0.0326138	8	2	CAGL0A02211g,CAGL0A04829g,	25	6.79	8.8	0.297716	1
GO:0043043	peptide biosynthetic process	1.34543e-15	257	40	CAGL0A03168g,CAGL0A03278g,CAGL0B03927g,CAGL0D05214g,CAGL0E01991g,CAGL0E03289g,CAGL0F01683g,CAGL0G00154g,CAGL0G02079g,CAGL0G02475g,CAGL0G05027g,CAGL0G06490g,CAGL0G06776g,CAGL0G07227g,CAGL0G08734g,CAGL0G09713g,CAGL0H00462g,CAGL0H00957g,CAGL0H05511g,CAGL0H08734g,CAGL0H09372g,CAGL0I00814g,CAGL0I08767g,CAGL0I09240g,CAGL0J05258g,CAGL0J06374g,CAGL0J07678g,CAGL0J09086g,CAGL0K00671g,CAGL0K03135g,CAGL0L036…	15.6	4.23	5.81	2.12174e-12	2.12174e-12
GO:0006518	peptide metabolic process	3.00913e-15	276	41	CAGL0A03168g,CAGL0A03278g,CAGL0B03927g,CAGL0D05214g,CAGL0E01991g,CAGL0E03289g,CAGL0F01683g,CAGL0G00154g,CAGL0G02079g,CAGL0G02475g,CAGL0G05027g,CAGL0G06490g,CAGL0G06776g,CAGL0G07227g,CAGL0G08734g,CAGL0G09713g,CAGL0H00462g,CAGL0H00957g,CAGL0H05511g,CAGL0H08734g,CAGL0H09372g,CAGL0I00814g,CAGL0I08767g,CAGL0I09240g,CAGL0J05258g,CAGL0J06374g,CAGL0J07678g,CAGL0J09086g,CAGL0J11484g,CAGL0K00671g,CAGL0K031…	14.9	4.04	5.51	2.13e-12	4.74539e-12
GO:0006412	translation	5.19603e-15	254	39	CAGL0A03168g,CAGL0A03278g,CAGL0B03927g,CAGL0D05214g,CAGL0E01991g,CAGL0E03289g,CAGL0F01683g,CAGL0G00154g,CAGL0G02079g,CAGL0G02475g,CAGL0G05027g,CAGL0G06490g,CAGL0G06776g,CAGL0G07227g,CAGL0G08734g,CAGL0G09713g,CAGL0H00462g,CAGL0H00957g,CAGL0H05511g,CAGL0H08734g,CAGL0H09372g,CAGL0I00814g,CAGL0I08767g,CAGL0I09240g,CAGL0J05258g,CAGL0J06374g,CAGL0J07678g,CAGL0J09086g,CAGL0K00671g,CAGL0K03135g,CAGL0L048…	15.4	4.17	5.68	2.13e-12	8.19415e-12
GO:0043604	amide biosynthetic process	5.40265e-15	294	42	CAGL0A03168g,CAGL0A03278g,CAGL0B03927g,CAGL0D05214g,CAGL0E01991g,CAGL0E03289g,CAGL0F01683g,CAGL0F08503g,CAGL0G00154g,CAGL0G02079g,CAGL0G02475g,CAGL0G05027g,CAGL0G06490g,CAGL0G06776g,CAGL0G07227g,CAGL0G08734g,CAGL0G09713g,CAGL0H00462g,CAGL0H00957g,CAGL0H05511g,CAGL0H08734g,CAGL0H09372g,CAGL0I00814g,CAGL0I08767g,CAGL0I09240g,CAGL0I10648g,CAGL0J05258g,CAGL0J06374g,CAGL0J07678g,CAGL0J09086g,CAGL0K006…	14.3	3.88	5.28	2.13e-12	8.51998e-12
GO:0043603	cellular amide metabolic process	2.23101e-14	334	44	CAGL0A03168g,CAGL0A03278g,CAGL0B03927g,CAGL0D05214g,CAGL0E01991g,CAGL0E03289g,CAGL0F01683g,CAGL0F08503g,CAGL0G00154g,CAGL0G02079g,CAGL0G02475g,CAGL0G05027g,CAGL0G06490g,CAGL0G06776g,CAGL0G07227g,CAGL0G08734g,CAGL0G09713g,CAGL0H00462g,CAGL0H00957g,CAGL0H04081g,CAGL0H05511g,CAGL0H08734g,CAGL0H09372g,CAGL0I00814g,CAGL0I08767g,CAGL0I09240g,CAGL0I10648g,CAGL0J05258g,CAGL0J06374g,CAGL0J07678g,CAGL0J090…	13.2	3.58	4.84	7.0366e-12	3.5183e-11
GO:0044271	cellular nitrogen compound biosynthetic process	1.17419e-11	712	62	CAGL0A01430g,CAGL0A03168g,CAGL0A03278g,CAGL0A04829g,CAGL0B02453g,CAGL0B03927g,CAGL0D05214g,CAGL0E01155g,CAGL0E01991g,CAGL0E02761g,CAGL0E03289g,CAGL0E05566g,CAGL0F01683g,CAGL0F02563g,CAGL0F08503g,CAGL0G00154g,CAGL0G02079g,CAGL0G02475g,CAGL0G05027g,CAGL0G06490g,CAGL0G06776g,CAGL0G06974g,CAGL0G07106g,CAGL0G07227g,CAGL0G08734g,CAGL0G09691g,CAGL0G09713g,CAGL0H00462g,CAGL0H00957g,CAGL0H05511g,CAGL0H083…	8.7	2.37	3.19	3.08616e-09	1.85169e-08
GO:1901566	organonitrogen compound biosynthetic process	2.91648e-11	689	60	CAGL0A01430g,CAGL0A03168g,CAGL0A03278g,CAGL0A04829g,CAGL0B03014g,CAGL0B03927g,CAGL0C01573g,CAGL0D00176g,CAGL0D05214g,CAGL0E01991g,CAGL0E03289g,CAGL0F00759g,CAGL0F01683g,CAGL0F02563g,CAGL0F08503g,CAGL0F09207g,CAGL0G00154g,CAGL0G02079g,CAGL0G02475g,CAGL0G05027g,CAGL0G06490g,CAGL0G06776g,CAGL0G07106g,CAGL0G07227g,CAGL0G08734g,CAGL0G09691g,CAGL0G09713g,CAGL0H00462g,CAGL0H00957g,CAGL0H05511g,CAGL0H083…	8.7	2.37	3.16	6.5704e-09	4.59928e-08
GO:0044249	cellular biosynthetic process	4.63922e-08	1195	77	CAGL0A01430g,CAGL0A03168g,CAGL0A03278g,CAGL0A04829g,CAGL0B02453g,CAGL0B03014g,CAGL0B03927g,CAGL0C01573g,CAGL0C04741g,CAGL0D00176g,CAGL0D04114g,CAGL0D05214g,CAGL0D05940g,CAGL0E01155g,CAGL0E01991g,CAGL0E02761g,CAGL0E03289g,CAGL0E05566g,CAGL0F00759g,CAGL0F01683g,CAGL0F01793g,CAGL0F02563g,CAGL0F08503g,CAGL0F09207g,CAGL0G00154g,CAGL0G02079g,CAGL0G02475g,CAGL0G05027g,CAGL0G06490g,CAGL0G06776g,CAGL0G069…	6.4	1.75	2.33	9.14506e-06	7.31605e-05
GO:0009058	biosynthetic process	9.214e-08	1236	78	CAGL0A01430g,CAGL0A03168g,CAGL0A03278g,CAGL0A04829g,CAGL0B02453g,CAGL0B03014g,CAGL0B03927g,CAGL0C01573g,CAGL0C04741g,CAGL0D00176g,CAGL0D04114g,CAGL0D05214g,CAGL0D05940g,CAGL0E01155g,CAGL0E01991g,CAGL0E02761g,CAGL0E03289g,CAGL0E05566g,CAGL0F00759g,CAGL0F01683g,CAGL0F01793g,CAGL0F02563g,CAGL0F08503g,CAGL0F09207g,CAGL0G00154g,CAGL0G01254g,CAGL0G02079g,CAGL0G02475g,CAGL0G05027g,CAGL0G06490g,CAGL0G067…	6.3	1.71	2.27	1.55073e-05	0.000145305
GO:1901576	organic substance biosynthetic process	9.8334e-08	1215	77	CAGL0A01430g,CAGL0A03168g,CAGL0A03278g,CAGL0A04829g,CAGL0B02453g,CAGL0B03014g,CAGL0B03927g,CAGL0C01573g,CAGL0C04741g,CAGL0D00176g,CAGL0D04114g,CAGL0D05214g,CAGL0D05940g,CAGL0E01155g,CAGL0E01991g,CAGL0E02761g,CAGL0E03289g,CAGL0E05566g,CAGL0F00759g,CAGL0F01683g,CAGL0F01793g,CAGL0F02563g,CAGL0F08503g,CAGL0F09207g,CAGL0G00154g,CAGL0G02079g,CAGL0G02475g,CAGL0G05027g,CAGL0G06490g,CAGL0G06776g,CAGL0G069…	6.3	1.72	2.27	1.55073e-05	0.000155073
GO:0055065	metal ion homeostasis	5.43245e-07	100	16	CAGL0C03333g,CAGL0C04741g,CAGL0D03322g,CAGL0E01969g,CAGL0F06831g,CAGL0G04631g,CAGL0G08151g,CAGL0I07491g,CAGL0I08767g,CAGL0K07315g,CAGL0K08756g,CAGL0K12034g,CAGL0L07810g,CAGL0M06457g,CAGL0M07942g,CAGL0M08602g,	16	4.35	5.34	7.3817e-05	0.000856697
GO:0055076	transition metal ion homeostasis	5.61702e-07	66	13	CAGL0C03333g,CAGL0C04741g,CAGL0D03322g,CAGL0E01969g,CAGL0F06831g,CAGL0G04631g,CAGL0G08151g,CAGL0I07491g,CAGL0I08767g,CAGL0K07315g,CAGL0K08756g,CAGL0M06457g,CAGL0M08602g,	19.7	5.35	6.8	7.3817e-05	0.000885804
GO:0006875	cellular metal ion homeostasis	6.24611e-07	89	15	CAGL0C03333g,CAGL0C04741g,CAGL0D03322g,CAGL0E01969g,CAGL0F06831g,CAGL0G04631g,CAGL0G08151g,CAGL0I07491g,CAGL0K07315g,CAGL0K08756g,CAGL0K12034g,CAGL0L07810g,CAGL0M06457g,CAGL0M07942g,CAGL0M08602g,	16.9	4.58	5.66	7.57702e-05	0.000985012
GO:0055082	cellular chemical homeostasis	1.53782e-06	148	19	CAGL0A04829g,CAGL0C03333g,CAGL0C04741g,CAGL0D03322g,CAGL0E01969g,CAGL0F00605g,CAGL0F06831g,CAGL0G04631g,CAGL0G06138g,CAGL0G08151g,CAGL0I07491g,CAGL0K07315g,CAGL0K08756g,CAGL0K12034g,CAGL0L07810g,CAGL0M01364g,CAGL0M06457g,CAGL0M07942g,CAGL0M08602g,	12.8	3.49	4.16	0.000173224	0.00242514
GO:0046916	cellular transition metal ion homeostasis	1.8934e-06	62	12	CAGL0C03333g,CAGL0C04741g,CAGL0D03322g,CAGL0E01969g,CAGL0F06831g,CAGL0G04631g,CAGL0G08151g,CAGL0I07491g,CAGL0K07315g,CAGL0K08756g,CAGL0M06457g,CAGL0M08602g,	19.4	5.26	6.63	0.00019906	0.0029859
GO:0098771	inorganic ion homeostasis	3.14252e-06	127	17	CAGL0C03333g,CAGL0C04741g,CAGL0D03322g,CAGL0E01969g,CAGL0F06831g,CAGL0G04631g,CAGL0G08151g,CAGL0I07491g,CAGL0I08767g,CAGL0K07315g,CAGL0K08756g,CAGL0K12034g,CAGL0L07810g,CAGL0M01364g,CAGL0M06457g,CAGL0M07942g,CAGL0M08602g,	13.4	3.64	4.33	0.000309734	0.00495575
GO:0048878	chemical homeostasis	3.88528e-06	172	20	CAGL0A04829g,CAGL0C03333g,CAGL0C04741g,CAGL0D03322g,CAGL0E01969g,CAGL0F00605g,CAGL0F06831g,CAGL0G04631g,CAGL0G06138g,CAGL0G08151g,CAGL0I07491g,CAGL0I08767g,CAGL0K07315g,CAGL0K08756g,CAGL0K12034g,CAGL0L07810g,CAGL0M01364g,CAGL0M06457g,CAGL0M07942g,CAGL0M08602g,	11.6	3.16	3.72	0.000360417	0.00612709
GO:0019725	cellular homeostasis	4.20551e-06	188	21	CAGL0A04829g,CAGL0C03333g,CAGL0C04741g,CAGL0D03322g,CAGL0E01969g,CAGL0F00605g,CAGL0F06831g,CAGL0G04631g,CAGL0G06138g,CAGL0G08151g,CAGL0I07491g,CAGL0K06259g,CAGL0K07315g,CAGL0K08756g,CAGL0K12034g,CAGL0L07810g,CAGL0M01364g,CAGL0M02167g,CAGL0M06457g,CAGL0M07942g,CAGL0M08602g,	11.2	3.03	3.57	0.000361468	0.00663208
GO:0055080	cation homeostasis	4.35503e-06	130	17	CAGL0C03333g,CAGL0C04741g,CAGL0D03322g,CAGL0E01969g,CAGL0F06831g,CAGL0G04631g,CAGL0G08151g,CAGL0I07491g,CAGL0I08767g,CAGL0K07315g,CAGL0K08756g,CAGL0K12034g,CAGL0L07810g,CAGL0M01364g,CAGL0M06457g,CAGL0M07942g,CAGL0M08602g,	13.1	3.55	4.22	0.000361468	0.00686789
GO:0030003	cellular cation homeostasis	5.23239e-06	118	16	CAGL0C03333g,CAGL0C04741g,CAGL0D03322g,CAGL0E01969g,CAGL0F06831g,CAGL0G04631g,CAGL0G08151g,CAGL0I07491g,CAGL0K07315g,CAGL0K08756g,CAGL0K12034g,CAGL0L07810g,CAGL0M01364g,CAGL0M06457g,CAGL0M07942g,CAGL0M08602g,	13.6	3.68	4.38	0.000412574	0.00825149
GO:0034645	cellular macromolecule biosynthetic process	6.32238e-06	756	51	CAGL0A03168g,CAGL0A03278g,CAGL0B02453g,CAGL0B03014g,CAGL0B03927g,CAGL0D05214g,CAGL0E01155g,CAGL0E01991g,CAGL0E02761g,CAGL0E03289g,CAGL0E05566g,CAGL0F00759g,CAGL0F01683g,CAGL0G00154g,CAGL0G02079g,CAGL0G02475g,CAGL0G05027g,CAGL0G06490g,CAGL0G06776g,CAGL0G06974g,CAGL0G07227g,CAGL0G08734g,CAGL0G09713g,CAGL0H00462g,CAGL0H00957g,CAGL0H05511g,CAGL0H08541g,CAGL0H08734g,CAGL0H09372g,CAGL0I00308g,CAGL0I008…	6.7	1.83	2.21	0.00047478	0.00997039
GO:0009059	macromolecule biosynthetic process	7.96536e-06	762	51	CAGL0A03168g,CAGL0A03278g,CAGL0B02453g,CAGL0B03014g,CAGL0B03927g,CAGL0D05214g,CAGL0E01155g,CAGL0E01991g,CAGL0E02761g,CAGL0E03289g,CAGL0E05566g,CAGL0F00759g,CAGL0F01683g,CAGL0G00154g,CAGL0G02079g,CAGL0G02475g,CAGL0G05027g,CAGL0G06490g,CAGL0G06776g,CAGL0G06974g,CAGL0G07227g,CAGL0G08734g,CAGL0G09713g,CAGL0H00462g,CAGL0H00957g,CAGL0H05511g,CAGL0H08541g,CAGL0H08734g,CAGL0H09372g,CAGL0I00308g,CAGL0I008…	6.7	1.82	2.19	0.000570971	0.0125614
GO:0006873	cellular ion homeostasis	1.11496e-05	125	16	CAGL0C03333g,CAGL0C04741g,CAGL0D03322g,CAGL0E01969g,CAGL0F06831g,CAGL0G04631g,CAGL0G08151g,CAGL0I07491g,CAGL0K07315g,CAGL0K08756g,CAGL0K12034g,CAGL0L07810g,CAGL0M01364g,CAGL0M06457g,CAGL0M07942g,CAGL0M08602g,	12.8	3.48	4.09	0.000764476	0.017583
GO:0050801	ion homeostasis	1.32365e-05	141	17	CAGL0C03333g,CAGL0C04741g,CAGL0D03322g,CAGL0E01969g,CAGL0F06831g,CAGL0G04631g,CAGL0G08151g,CAGL0I07491g,CAGL0I08767g,CAGL0K07315g,CAGL0K08756g,CAGL0K12034g,CAGL0L07810g,CAGL0M01364g,CAGL0M06457g,CAGL0M07942g,CAGL0M08602g,	12.1	3.28	3.83	0.00086975	0.020874
GO:1901564	organonitrogen compound metabolic process	3.2319e-05	1519	82	CAGL0A01430g,CAGL0A03168g,CAGL0A03278g,CAGL0A04829g,CAGL0B03014g,CAGL0B03927g,CAGL0C01573g,CAGL0C02623g,CAGL0C05027g,CAGL0D00176g,CAGL0D02926g,CAGL0D05214g,CAGL0E01727g,CAGL0E01991g,CAGL0E03289g,CAGL0E03652g,CAGL0F00759g,CAGL0F01683g,CAGL0F02563g,CAGL0F04477g,CAGL0F06809g,CAGL0F08503g,CAGL0F09207g,CAGL0G00154g,CAGL0G01254g,CAGL0G01320g,CAGL0G02079g,CAGL0G02475g,CAGL0G03641g,CAGL0G05027g,CAGL0G061…	5.4	1.47	1.85	0.00203868	0.050967
GO:0072503	cellular divalent inorganic cation homeostasis	6.44381e-05	29	7	CAGL0C04741g,CAGL0D03322g,CAGL0E01969g,CAGL0G04631g,CAGL0I07491g,CAGL0K12034g,CAGL0M06457g,	24.1	6.56	8.6	0.00390842	0.101619
GO:0042592	homeostatic process	0.000171154	276	23	CAGL0A04829g,CAGL0C03333g,CAGL0C04741g,CAGL0D02926g,CAGL0D03322g,CAGL0E01969g,CAGL0F00605g,CAGL0F06831g,CAGL0G04631g,CAGL0G06138g,CAGL0G08151g,CAGL0I07491g,CAGL0I08767g,CAGL0K06259g,CAGL0K07315g,CAGL0K08756g,CAGL0K12034g,CAGL0L07810g,CAGL0M01364g,CAGL0M02167g,CAGL0M06457g,CAGL0M07942g,CAGL0M08602g,	8.3	2.26	2.56	0.00999668	0.26991
GO:0007008	outer mitochondrial membrane organization	0.000201424	16	5	CAGL0D04834g,CAGL0F01221g,CAGL0F06693g,CAGL0H06127g,CAGL0I05720g,	31.3	8.49	12.18	0.0113445	0.317646
GO:0072507	divalent inorganic cation homeostasis	0.000230106	35	7	CAGL0C04741g,CAGL0D03322g,CAGL0E01969g,CAGL0G04631g,CAGL0I07491g,CAGL0K12034g,CAGL0M06457g,	20	5.43	6.75	0.012513	0.362877
GO:0006882	cellular zinc ion homeostasis	0.000314172	10	4	CAGL0C04741g,CAGL0D03322g,CAGL0G04631g,CAGL0I07491g,	40	10.87	17.79	0.0159822	0.495449
GO:0055069	zinc ion homeostasis	0.000314172	10	4	CAGL0C04741g,CAGL0D03322g,CAGL0G04631g,CAGL0I07491g,	40	10.87	17.79	0.0159822	0.495449
GO:0002181	cytoplasmic translation	0.000414817	50	8	CAGL0A03168g,CAGL0D05214g,CAGL0F01683g,CAGL0H00957g,CAGL0I08767g,CAGL0I09240g,CAGL0J07678g,CAGL0M02497g,	16	4.35	5.15	0.0204427	0.654166
GO:0034641	cellular nitrogen compound metabolic process	0.000441532	1529	78	CAGL0A01430g,CAGL0A03168g,CAGL0A03278g,CAGL0A04829g,CAGL0B02453g,CAGL0B03927g,CAGL0B04807g,CAGL0C02623g,CAGL0C05027g,CAGL0D02926g,CAGL0D05214g,CAGL0E01155g,CAGL0E01991g,CAGL0E02761g,CAGL0E03289g,CAGL0E05566g,CAGL0F01683g,CAGL0F02563g,CAGL0F08503g,CAGL0G00154g,CAGL0G01254g,CAGL0G02079g,CAGL0G02255g,CAGL0G02475g,CAGL0G05027g,CAGL0G06490g,CAGL0G06776g,CAGL0G06974g,CAGL0G07106g,CAGL0G07227g,CAGL0G087…	5.1	1.39	1.68	0.0210999	0.696296
GO:0051029	rRNA transport	0.000698707	12	4	CAGL0E01991g,CAGL0G07227g,CAGL0H00462g,CAGL0M04873g,	33.3	9.05	13.34	0.0306072	1
GO:0045040	protein import into mitochondrial outer membrane	0.000698707	12	4	CAGL0F01221g,CAGL0F06693g,CAGL0H06127g,CAGL0I05720g,	33.3	9.05	13.34	0.0306072	1
GO:0006407	rRNA export from nucleus	0.000698707	12	4	CAGL0E01991g,CAGL0G07227g,CAGL0H00462g,CAGL0M04873g,	33.3	9.05	13.34	0.0306072	1
GO:0071456	cellular response to hypoxia	0.000905133	6	3	CAGL0E05566g,CAGL0F06831g,CAGL0L04840g,	50	13.58	26.56	0.037563	1
GO:0044283	small molecule biosynthetic process	0.0011641	277	21	CAGL0A01430g,CAGL0A04829g,CAGL0C01573g,CAGL0D00176g,CAGL0D04114g,CAGL0D05940g,CAGL0F01793g,CAGL0F02563g,CAGL0F08503g,CAGL0F09207g,CAGL0G09691g,CAGL0H04081g,CAGL0H08327g,CAGL0H10142g,CAGL0I09592g,CAGL0I10648g,CAGL0J01441g,CAGL0K10978g,CAGL0L10043g,CAGL0M07656g,CAGL0M12386g,	7.6	2.06	2.28	0.0470714	1
GO:0042440	pigment metabolic process	0.00130871	34	6	CAGL0C04741g,CAGL0G01254g,CAGL0G07106g,CAGL0G09691g,CAGL0J09680g,CAGL0M08602g,	17.6	4.79	5.75	0.051596	1
GO:0006414	translational elongation	0.00154137	24	5	CAGL0A03168g,CAGL0G00154g,CAGL0I00814g,CAGL0I08767g,CAGL0J06374g,	20.8	5.66	7.04	0.0565289	1
GO:1901522	positive regulation of transcription from RNA polymerase II promoter involved in cellular response to chemical stimulus	0.00154137	24	5	CAGL0C04741g,CAGL0F06831g,CAGL0K01727g,CAGL0K06259g,CAGL0K08756g,	20.8	5.66	7.04	0.0565289	1
GO:0000462	maturation of SSU-rRNA from tricistronic rRNA transcript (SSU-rRNA, 5.8S rRNA, LSU-rRNA)	0.00208653	78	9	CAGL0G05027g,CAGL0G07227g,CAGL0H05511g,CAGL0I03234g,CAGL0K00671g,CAGL0K03135g,CAGL0L04840g,CAGL0M00814g,CAGL0M06501g,	11.5	3.13	3.53	0.0723152	1
GO:0006520	cellular amino acid metabolic process	0.00215844	178	15	CAGL0A01430g,CAGL0C01573g,CAGL0D00176g,CAGL0F09207g,CAGL0G01254g,CAGL0G09691g,CAGL0H09372g,CAGL0H10142g,CAGL0I01342g,CAGL0I09592g,CAGL0I10648g,CAGL0J01441g,CAGL0K10978g,CAGL0L02035g,CAGL0M12386g,	8.4	2.29	2.53	0.0723152	1
GO:0016129	phytosteroid biosynthetic process	0.00224695	26	5	CAGL0D04114g,CAGL0D05940g,CAGL0F01793g,CAGL0H04081g,CAGL0M07656g,	19.2	5.22	6.37	0.0723152	1
GO:0044108	cellular alcohol biosynthetic process	0.00224695	26	5	CAGL0D04114g,CAGL0D05940g,CAGL0F01793g,CAGL0H04081g,CAGL0M07656g,	19.2	5.22	6.37	0.0723152	1
GO:0055072	iron ion homeostasis	0.00237714	38	6	CAGL0C03333g,CAGL0F06831g,CAGL0G08151g,CAGL0I08767g,CAGL0K08756g,CAGL0M08602g,	15.8	4.29	5.03	0.0749748	1
GO:0008204	ergosterol metabolic process	0.00267647	27	5	CAGL0D04114g,CAGL0D05940g,CAGL0F01793g,CAGL0H04081g,CAGL0M07656g,	18.5	5.03	6.08	0.0811692	1
GO:0016128	phytosteroid metabolic process	0.00267647	27	5	CAGL0D04114g,CAGL0D05940g,CAGL0F01793g,CAGL0H04081g,CAGL0M07656g,	18.5	5.03	6.08	0.0811692	1
GO:0071428	rRNA-containing ribonucleoprotein complex export from nucleus	0.00301265	53	7	CAGL0E01991g,CAGL0F06809g,CAGL0G00154g,CAGL0G02475g,CAGL0G07227g,CAGL0H00462g,CAGL0M04873g,	13.2	3.59	4.09	0.0896404	1
GO:1902653	secondary alcohol biosynthetic process	0.00316252	28	5	CAGL0D04114g,CAGL0D05940g,CAGL0F01793g,CAGL0H04081g,CAGL0M07656g,	17.9	4.85	5.81	0.0912555	1
GO:0036294	cellular response to decreased oxygen levels	0.00350174	9	3	CAGL0E05566g,CAGL0F06831g,CAGL0L04840g,	33.3	9.05	13.27	0.0912555	1
GO:0051090	regulation of DNA-binding transcription factor activity	0.00350174	9	3	CAGL0C04741g,CAGL0J10846g,CAGL0K06259g,	33.3	9.05	13.27	0.0912555	1
GO:0036293	response to decreased oxygen levels	0.00350174	9	3	CAGL0E05566g,CAGL0F06831g,CAGL0L04840g,	33.3	9.05	13.27	0.0912555	1
GO:0006825	copper ion transport	0.00350174	9	3	CAGL0C03333g,CAGL0E01969g,CAGL0M08602g,	33.3	9.05	13.27	0.0912555	1
GO:0046394	carboxylic acid biosynthetic process	0.00352986	169	14	CAGL0A01430g,CAGL0A04829g,CAGL0C01573g,CAGL0D00176g,CAGL0F01793g,CAGL0F08503g,CAGL0F09207g,CAGL0G09691g,CAGL0H08327g,CAGL0H10142g,CAGL0I09592g,CAGL0I10648g,CAGL0K10978g,CAGL0M12386g,	8.3	2.25	2.47	0.0912555	1
GO:0016053	organic acid biosynthetic process	0.00352986	169	14	CAGL0A01430g,CAGL0A04829g,CAGL0C01573g,CAGL0D00176g,CAGL0F01793g,CAGL0F08503g,CAGL0F09207g,CAGL0G09691g,CAGL0H08327g,CAGL0H10142g,CAGL0I09592g,CAGL0I10648g,CAGL0K10978g,CAGL0M12386g,	8.3	2.25	2.47	0.0912555	1
GO:0019752	carboxylic acid metabolic process	0.00362526	324	22	CAGL0A01430g,CAGL0A04829g,CAGL0C01573g,CAGL0C05027g,CAGL0D00176g,CAGL0F01793g,CAGL0F08503g,CAGL0F09207g,CAGL0G01254g,CAGL0G09691g,CAGL0H08327g,CAGL0H09372g,CAGL0H10142g,CAGL0I01342g,CAGL0I09592g,CAGL0I10648g,CAGL0J01441g,CAGL0J08272g,CAGL0K05027g,CAGL0K10978g,CAGL0L02035g,CAGL0M12386g,	6.8	1.84	2.02	0.091395	1
GO:0044107	cellular alcohol metabolic process	0.00370912	29	5	CAGL0D04114g,CAGL0D05940g,CAGL0F01793g,CAGL0H04081g,CAGL0M07656g,	17.2	4.68	5.57	0.091395	1
GO:1902652	secondary alcohol metabolic process	0.00370912	29	5	CAGL0D04114g,CAGL0D05940g,CAGL0F01793g,CAGL0H04081g,CAGL0M07656g,	17.2	4.68	5.57	0.091395	1
GO:0046033	AMP metabolic process	0.00394726	3	2	CAGL0G07106g,CAGL0K05027g,	66.7	18.11	52.86	0.0915417	1
GO:0034395	regulation of transcription from RNA polymerase II promoter in response to iron	0.00394726	3	2	CAGL0G03971g,CAGL0K08756g,	66.7	18.11	52.86	0.0915417	1
GO:0006167	AMP biosynthetic process	0.00394726	3	2	CAGL0G07106g,CAGL0K05027g,	66.7	18.11	52.86	0.0915417	1
GO:0071421	manganese ion transmembrane transport	0.00394726	3	2	CAGL0E01969g,CAGL0M06457g,	66.7	18.11	52.86	0.0915417	1
GO:0016126	sterol biosynthetic process	0.00432031	30	5	CAGL0D04114g,CAGL0D05940g,CAGL0F01793g,CAGL0H04081g,CAGL0M07656g,	16.7	4.53	5.34	0.098741	1
GO:0072521	purine-containing compound metabolic process	0.00499998	122	11	CAGL0A04829g,CAGL0C02623g,CAGL0F02563g,CAGL0G07106g,CAGL0G09691g,CAGL0H04081g,CAGL0H08327g,CAGL0H09328g,CAGL0J01441g,CAGL0K05027g,CAGL0K10780g,	9	2.45	2.69	0.112642	1
GO:0043436	oxoacid metabolic process	0.00522096	334	22	CAGL0A01430g,CAGL0A04829g,CAGL0C01573g,CAGL0C05027g,CAGL0D00176g,CAGL0F01793g,CAGL0F08503g,CAGL0F09207g,CAGL0G01254g,CAGL0G09691g,CAGL0H08327g,CAGL0H09372g,CAGL0H10142g,CAGL0I01342g,CAGL0I09592g,CAGL0I10648g,CAGL0J01441g,CAGL0J08272g,CAGL0K05027g,CAGL0K10978g,CAGL0L02035g,CAGL0M12386g,	6.6	1.79	1.95	0.115964	1
GO:0006082	organic acid metabolic process	0.00540853	335	22	CAGL0A01430g,CAGL0A04829g,CAGL0C01573g,CAGL0C05027g,CAGL0D00176g,CAGL0F01793g,CAGL0F08503g,CAGL0F09207g,CAGL0G01254g,CAGL0G09691g,CAGL0H08327g,CAGL0H09372g,CAGL0H10142g,CAGL0I01342g,CAGL0I09592g,CAGL0I10648g,CAGL0J01441g,CAGL0J08272g,CAGL0K05027g,CAGL0K10978g,CAGL0L02035g,CAGL0M12386g,	6.6	1.78	1.95	0.118462	1
GO:0030490	maturation of SSU-rRNA	0.00553131	90	9	CAGL0G05027g,CAGL0G07227g,CAGL0H05511g,CAGL0I03234g,CAGL0K00671g,CAGL0K03135g,CAGL0L04840g,CAGL0M00814g,CAGL0M06501g,	10	2.72	3	0.119363	1
GO:0042274	ribosomal small subunit biogenesis	0.00570214	107	10	CAGL0E01991g,CAGL0G05027g,CAGL0G07227g,CAGL0H05511g,CAGL0I03234g,CAGL0K00671g,CAGL0K03135g,CAGL0L04840g,CAGL0M00814g,CAGL0M06501g,	9.3	2.54	2.79	0.119363	1
GO:0006694	steroid biosynthetic process	0.00575241	32	5	CAGL0D04114g,CAGL0D05940g,CAGL0F01793g,CAGL0H04081g,CAGL0M07656g,	15.6	4.24	4.95	0.119363	1
GO:0046148	pigment biosynthetic process	0.00575241	32	5	CAGL0C04741g,CAGL0G01254g,CAGL0G07106g,CAGL0G09691g,CAGL0J09680g,	15.6	4.24	4.95	0.119363	1
GO:0006163	purine nucleotide metabolic process	0.00608772	108	10	CAGL0A04829g,CAGL0C02623g,CAGL0F02563g,CAGL0G07106g,CAGL0H04081g,CAGL0H08327g,CAGL0H09328g,CAGL0J01441g,CAGL0K05027g,CAGL0K10780g,	9.3	2.52	2.76	0.12468	1
GO:0070482	response to oxygen levels	0.00651346	11	3	CAGL0E05566g,CAGL0F06831g,CAGL0L04840g,	27.3	7.41	9.95	0.126819	1
GO:1900233	positive regulation of single-species biofilm formation on inanimate substrate	0.00651346	11	3	CAGL0E05566g,CAGL0I00308g,CAGL0L02475g,	27.3	7.41	9.95	0.126819	1
GO:0071453	cellular response to oxygen levels	0.00651346	11	3	CAGL0E05566g,CAGL0F06831g,CAGL0L04840g,	27.3	7.41	9.95	0.126819	1
GO:0090151	establishment of protein localization to mitochondrial membrane	0.00651384	21	4	CAGL0F01221g,CAGL0F06693g,CAGL0H06127g,CAGL0I05720g,	19	5.17	6.26	0.126819	1
GO:0006879	cellular iron ion homeostasis	0.00749024	34	5	CAGL0C03333g,CAGL0F06831g,CAGL0G08151g,CAGL0K08756g,CAGL0M08602g,	14.7	3.99	4.6	0.140632	1
GO:0044267	cellular protein metabolic process	0.00749085	1005	51	CAGL0A03168g,CAGL0A03278g,CAGL0B03014g,CAGL0B03927g,CAGL0D02926g,CAGL0D05214g,CAGL0E01991g,CAGL0E03289g,CAGL0F00759g,CAGL0F01683g,CAGL0F04477g,CAGL0F06809g,CAGL0G00154g,CAGL0G01320g,CAGL0G02079g,CAGL0G02475g,CAGL0G05027g,CAGL0G06138g,CAGL0G06490g,CAGL0G06776g,CAGL0G07227g,CAGL0G08734g,CAGL0G09713g,CAGL0H00462g,CAGL0H00957g,CAGL0H02035g,CAGL0H04499g,CAGL0H04961g,CAGL0H05511g,CAGL0H08734g,CAGL0H093…	5.1	1.38	1.54	0.140632	1
GO:0032261	purine nucleotide salvage	0.00770326	4	2	CAGL0F02563g,CAGL0G07106g,	50	13.58	26.42	0.142918	1
GO:0019538	protein metabolic process	0.0078506	1080	54	CAGL0A03168g,CAGL0A03278g,CAGL0B03014g,CAGL0B03927g,CAGL0D02926g,CAGL0D05214g,CAGL0E01727g,CAGL0E01991g,CAGL0E03289g,CAGL0E03652g,CAGL0F00759g,CAGL0F01683g,CAGL0F04477g,CAGL0F06809g,CAGL0G00154g,CAGL0G01320g,CAGL0G02079g,CAGL0G02475g,CAGL0G03641g,CAGL0G05027g,CAGL0G06138g,CAGL0G06490g,CAGL0G06776g,CAGL0G07227g,CAGL0G08734g,CAGL0G09713g,CAGL0H00462g,CAGL0H00957g,CAGL0H02035g,CAGL0H04499g,CAGL0H049…	5	1.36	1.52	0.143958	1
GO:0019740	nitrogen utilization	0.00845171	12	3	CAGL0A03212g,CAGL0D00176g,CAGL0I10747g,	25	6.79	8.84	0.153199	1
GO:0022613	ribonucleoprotein complex biogenesis	0.00896245	350	22	CAGL0E01991g,CAGL0E03289g,CAGL0F06809g,CAGL0G00154g,CAGL0G02475g,CAGL0G05027g,CAGL0G06490g,CAGL0G07227g,CAGL0H00462g,CAGL0H00957g,CAGL0H05511g,CAGL0I01364g,CAGL0I03234g,CAGL0J00957g,CAGL0J07678g,CAGL0J09086g,CAGL0K00671g,CAGL0K03135g,CAGL0L04840g,CAGL0M00814g,CAGL0M04873g,CAGL0M06501g,	6.3	1.71	1.85	0.160611	1
GO:0006006	glucose metabolic process	0.00909998	23	4	CAGL0A04829g,CAGL0H08327g,CAGL0J01441g,CAGL0L10043g,	17.4	4.72	5.6	0.161243	1
GO:0065008	regulation of biological quality	0.0103381	485	28	CAGL0A04103g,CAGL0A04829g,CAGL0C03333g,CAGL0C04741g,CAGL0D02926g,CAGL0D03322g,CAGL0E01969g,CAGL0F00605g,CAGL0F06831g,CAGL0G00154g,CAGL0G04631g,CAGL0G06138g,CAGL0G08151g,CAGL0I07491g,CAGL0I08767g,CAGL0J10846g,CAGL0K06259g,CAGL0K07315g,CAGL0K08756g,CAGL0K12034g,CAGL0L04840g,CAGL0L07810g,CAGL0M01364g,CAGL0M02167g,CAGL0M06457g,CAGL0M06501g,CAGL0M07942g,CAGL0M08602g,	5.8	1.57	1.7	0.181009	1
GO:0046165	alcohol biosynthetic process	0.0104451	51	6	CAGL0D04114g,CAGL0D05940g,CAGL0F01793g,CAGL0H04081g,CAGL0J01441g,CAGL0M07656g,	11.8	3.2	3.57	0.181009	1
GO:0009167	purine ribonucleoside monophosphate metabolic process	0.0116091	84	8	CAGL0A04829g,CAGL0C02623g,CAGL0F02563g,CAGL0G07106g,CAGL0H08327g,CAGL0H09328g,CAGL0J01441g,CAGL0K05027g,	9.5	2.59	2.83	0.196855	1
GO:0009126	purine nucleoside monophosphate metabolic process	0.0116091	84	8	CAGL0A04829g,CAGL0C02623g,CAGL0F02563g,CAGL0G07106g,CAGL0H08327g,CAGL0H09328g,CAGL0J01441g,CAGL0K05027g,	9.5	2.59	2.83	0.196855	1
GO:0016125	sterol metabolic process	0.0120024	38	5	CAGL0D04114g,CAGL0D05940g,CAGL0F01793g,CAGL0H04081g,CAGL0M07656g,	13.2	3.57	4.04	0.201359	1
GO:0010039	response to iron ion	0.0125287	5	2	CAGL0G03971g,CAGL0K08756g,	40	10.87	17.61	0.203688	1
GO:0006541	glutamine metabolic process	0.0125287	5	2	CAGL0D00176g,CAGL0I09592g,	40	10.87	17.61	0.203688	1
GO:0071281	cellular response to iron ion	0.0125287	5	2	CAGL0G03971g,CAGL0K08756g,	40	10.87	17.61	0.203688	1
GO:0040009	regulation of growth rate	0.0132458	14	3	CAGL0F06809g,CAGL0G06138g,CAGL0H06127g,	21.4	5.82	7.23	0.208886	1
GO:0055070	copper ion homeostasis	0.0132458	14	3	CAGL0C04741g,CAGL0E01969g,CAGL0K07315g,	21.4	5.82	7.23	0.208886	1
GO:0006878	cellular copper ion homeostasis	0.0132458	14	3	CAGL0C04741g,CAGL0E01969g,CAGL0K07315g,	21.4	5.82	7.23	0.208886	1
GO:0009161	ribonucleoside monophosphate metabolic process	0.0141755	87	8	CAGL0A04829g,CAGL0C02623g,CAGL0F02563g,CAGL0G07106g,CAGL0H08327g,CAGL0H09328g,CAGL0J01441g,CAGL0K05027g,	9.2	2.5	2.72	0.221334	1
GO:0097064	ncRNA export from nucleus	0.0160872	27	4	CAGL0E01991g,CAGL0G07227g,CAGL0H00462g,CAGL0M04873g,	14.8	4.02	4.62	0.24872	1
GO:0008202	steroid metabolic process	0.0164013	41	5	CAGL0D04114g,CAGL0D05940g,CAGL0F01793g,CAGL0H04081g,CAGL0M07656g,	12.2	3.31	3.7	0.249604	1
GO:0009150	purine ribonucleotide metabolic process	0.0164609	107	9	CAGL0A04829g,CAGL0C02623g,CAGL0F02563g,CAGL0G07106g,CAGL0H04081g,CAGL0H08327g,CAGL0H09328g,CAGL0J01441g,CAGL0K05027g,	8.4	2.28	2.47	0.249604	1
GO:0044281	small molecule metabolic process	0.017825	598	32	CAGL0A01430g,CAGL0A04829g,CAGL0C01573g,CAGL0C02623g,CAGL0C05027g,CAGL0D00176g,CAGL0D04114g,CAGL0D05940g,CAGL0F01793g,CAGL0F02563g,CAGL0F08503g,CAGL0F09207g,CAGL0G01254g,CAGL0G07106g,CAGL0G09691g,CAGL0H04081g,CAGL0H08327g,CAGL0H09328g,CAGL0H09372g,CAGL0H10142g,CAGL0I01342g,CAGL0I09592g,CAGL0I10648g,CAGL0J01441g,CAGL0J08272g,CAGL0K05027g,CAGL0K10780g,CAGL0K10978g,CAGL0L02035g,CAGL0L10043g,CAGL0M076…	5.4	1.45	1.57	0.260566	1
GO:0009123	nucleoside monophosphate metabolic process	0.0182114	91	8	CAGL0A04829g,CAGL0C02623g,CAGL0F02563g,CAGL0G07106g,CAGL0H08327g,CAGL0H09328g,CAGL0J01441g,CAGL0K05027g,	8.8	2.39	2.59	0.260566	1
GO:1900231	regulation of single-species biofilm formation on inanimate substrate	0.0182413	28	4	CAGL0B02453g,CAGL0E05566g,CAGL0I00308g,CAGL0L02475g,	14.3	3.88	4.43	0.260566	1
GO:0006383	transcription by RNA polymerase III	0.0182413	28	4	CAGL0B02453g,CAGL0G06974g,CAGL0H08541g,CAGL0L02799g,	14.3	3.88	4.43	0.260566	1
GO:0043433	negative regulation of DNA-binding transcription factor activity	0.0183404	6	2	CAGL0J10846g,CAGL0K06259g,	33.3	9.05	13.21	0.260566	1
GO:0006828	manganese ion transport	0.0183404	6	2	CAGL0E01969g,CAGL0M06457g,	33.3	9.05	13.21	0.260566	1
GO:0031204	posttranslational protein targeting to membrane, translocation	0.0183404	6	2	CAGL0H04961g,CAGL0M11104g,	33.3	9.05	13.21	0.260566	1
GO:0001678	cellular glucose homeostasis	0.0193067	16	3	CAGL0A04829g,CAGL0F00605g,CAGL0G06138g,	18.8	5.09	6.12	0.263785	1
GO:0033500	carbohydrate homeostasis	0.0193067	16	3	CAGL0A04829g,CAGL0F00605g,CAGL0G06138g,	18.8	5.09	6.12	0.263785	1
GO:0042593	glucose homeostasis	0.0193067	16	3	CAGL0A04829g,CAGL0F00605g,CAGL0G06138g,	18.8	5.09	6.12	0.263785	1
GO:0006450	regulation of translational fidelity	0.0193067	16	3	CAGL0G00154g,CAGL0L04840g,CAGL0M06501g,	18.8	5.09	6.12	0.263785	1
GO:1901362	organic cyclic compound biosynthetic process	0.0194033	510	28	CAGL0A01430g,CAGL0A04829g,CAGL0B02453g,CAGL0C01573g,CAGL0D04114g,CAGL0D05940g,CAGL0E01155g,CAGL0E02761g,CAGL0E05566g,CAGL0F01793g,CAGL0F02563g,CAGL0F08503g,CAGL0G06974g,CAGL0G07106g,CAGL0G09691g,CAGL0H04081g,CAGL0H08327g,CAGL0H08541g,CAGL0H10142g,CAGL0I00308g,CAGL0I09592g,CAGL0J00869g,CAGL0J09680g,CAGL0K05027g,CAGL0K10780g,CAGL0L02799g,CAGL0L10043g,CAGL0M07656g,	5.5	1.49	1.61	0.263785	1
GO:1901605	alpha-amino acid metabolic process	0.0204699	111	9	CAGL0A01430g,CAGL0D00176g,CAGL0G01254g,CAGL0G09691g,CAGL0I09592g,CAGL0I10648g,CAGL0J01441g,CAGL0K10978g,CAGL0M12386g,	8.1	2.2	2.37	0.274858	1
GO:0000041	transition metal ion transport	0.0205664	29	4	CAGL0C03333g,CAGL0E01969g,CAGL0M06457g,CAGL0M08602g,	13.8	3.75	4.25	0.274858	1
GO:0006066	alcohol metabolic process	0.0224602	77	7	CAGL0C05027g,CAGL0D04114g,CAGL0D05940g,CAGL0F01793g,CAGL0H04081g,CAGL0J01441g,CAGL0M07656g,	9.1	2.47	2.68	0.29573	1
GO:0009259	ribonucleotide metabolic process	0.0227198	113	9	CAGL0A04829g,CAGL0C02623g,CAGL0F02563g,CAGL0G07106g,CAGL0H04081g,CAGL0H08327g,CAGL0H09328g,CAGL0J01441g,CAGL0K05027g,	8	2.16	2.33	0.29573	1
GO:0017001	antibiotic catabolic process	0.022821	17	3	CAGL0C05027g,CAGL0J01441g,CAGL0K06259g,	17.6	4.79	5.68	0.29573	1
GO:0009072	aromatic amino acid family metabolic process	0.0230658	30	4	CAGL0A01430g,CAGL0C01573g,CAGL0G01254g,CAGL0H10142g,	13.3	3.62	4.09	0.29573	1
GO:0043648	dicarboxylic acid metabolic process	0.0230658	30	4	CAGL0D00176g,CAGL0G01254g,CAGL0K05027g,CAGL0L02035g,	13.3	3.62	4.09	0.29573	1
GO:1901617	organic hydroxy compound biosynthetic process	0.0238229	61	6	CAGL0D04114g,CAGL0D05940g,CAGL0F01793g,CAGL0H04081g,CAGL0J01441g,CAGL0M07656g,	9.8	2.67	2.91	0.297716	1
GO:0072522	purine-containing compound biosynthetic process	0.0239326	78	7	CAGL0A04829g,CAGL0F02563g,CAGL0G07106g,CAGL0G09691g,CAGL0H08327g,CAGL0K05027g,CAGL0K10780g,	9	2.44	2.64	0.297716	1
GO:1900435	negative regulation of filamentous growth of a population of unicellular organisms in response to starvation	0.0250601	7	2	CAGL0G01320g,CAGL0L09383g,	28.6	7.76	10.56	0.297716	1
GO:0061687	detoxification of inorganic compound	0.0250601	7	2	CAGL0K06259g,CAGL0L03630g,	28.6	7.76	10.56	0.297716	1
GO:0043173	nucleotide salvage	0.0250601	7	2	CAGL0F02563g,CAGL0G07106g,	28.6	7.76	10.56	0.297716	1
GO:0034220	ion transmembrane transport	0.0251419	115	9	CAGL0A01199g,CAGL0E01969g,CAGL0E05346g,CAGL0F08987g,CAGL0I02178g,CAGL0I10747g,CAGL0K12034g,CAGL0M06457g,CAGL0M08602g,	7.8	2.13	2.28	0.297716	1
GO:0045454	cell redox homeostasis	0.0257423	31	4	CAGL0C04741g,CAGL0G08151g,CAGL0K06259g,CAGL0M02167g,	12.9	3.51	3.94	0.297716	1
GO:0006090	pyruvate metabolic process	0.0257423	31	4	CAGL0A04829g,CAGL0H08327g,CAGL0J01441g,CAGL0L02035g,	12.9	3.51	3.94	0.297716	1
GO:0098655	cation transmembrane transport	0.0270742	80	7	CAGL0E01969g,CAGL0E05346g,CAGL0F08987g,CAGL0I10747g,CAGL0K12034g,CAGL0M06457g,CAGL0M08602g,	8.8	2.38	2.57	0.297716	1
GO:0046395	carboxylic acid catabolic process	0.0274541	63	6	CAGL0C05027g,CAGL0F09207g,CAGL0G01254g,CAGL0I09592g,CAGL0J01441g,CAGL0J08272g,	9.5	2.59	2.81	0.297716	1
GO:0016054	organic acid catabolic process	0.0274541	63	6	CAGL0C05027g,CAGL0F09207g,CAGL0G01254g,CAGL0I09592g,CAGL0J01441g,CAGL0J08272g,	9.5	2.59	2.81	0.297716	1
GO:0009063	cellular amino acid catabolic process	0.0285979	32	4	CAGL0F09207g,CAGL0G01254g,CAGL0I09592g,CAGL0J01441g,	12.5	3.4	3.8	0.297716	1
GO:0055114	oxidation-reduction process	0.0287698	281	17	CAGL0C02623g,CAGL0C03333g,CAGL0C04741g,CAGL0C05027g,CAGL0D00176g,CAGL0D04114g,CAGL0D05940g,CAGL0F01793g,CAGL0H08327g,CAGL0H09328g,CAGL0J01441g,CAGL0J08272g,CAGL0K06259g,CAGL0K10780g,CAGL0L02035g,CAGL0M07656g,CAGL0M07942g,	6	1.64	1.75	0.297716	1
GO:0055086	nucleobase-containing small molecule metabolic process	0.031021	199	13	CAGL0A04829g,CAGL0C02623g,CAGL0F02563g,CAGL0G07106g,CAGL0G09691g,CAGL0H04081g,CAGL0H08327g,CAGL0H09328g,CAGL0I09592g,CAGL0J01441g,CAGL0K05027g,CAGL0K10780g,CAGL0L10043g,	6.5	1.77	1.89	0.297716	1
GO:0036091	positive regulation of transcription from RNA polymerase II promoter in response to oxidative stress	0.0326138	8	2	CAGL0C04741g,CAGL0K06259g,	25	6.79	8.8	0.297716	1
GO:0001731	formation of translation preinitiation complex	0.0326138	8	2	CAGL0H00957g,CAGL0J07678g,	25	6.79	8.8	0.297716	1
GO:0032102	negative regulation of response to external stimulus	0.0326138	8	2	CAGL0G01320g,CAGL0L09383g,	25	6.79	8.8	0.297716	1
GO:0032108	negative regulation of response to nutrient levels	0.0326138	8	2	CAGL0G01320g,CAGL0L09383g,	25	6.79	8.8	0.297716	1
GO:0032105	negative regulation of response to extracellular stimulus	0.0326138	8	2	CAGL0G01320g,CAGL0L09383g,	25	6.79	8.8	0.297716	1
GO:0007006	mitochondrial membrane organization	0.0330016	49	5	CAGL0D04834g,CAGL0F01221g,CAGL0F06693g,CAGL0H06127g,CAGL0I05720g,	10.2	2.77	3.03	0.297716	1
GO:0098662	inorganic cation transmembrane transport	0.0357744	67	6	CAGL0E01969g,CAGL0E05346g,CAGL0F08987g,CAGL0K12034g,CAGL0M06457g,CAGL0M08602g,	9	2.43	2.62	0.297716	1
GO:0006385	transcription elongation from RNA polymerase III promoter	0.0368133	1	1	CAGL0H08541g,	100	27.16	inf	0.297716	1
GO:0061399	positive regulation of transcription from RNA polymerase II promoter in response to cobalt ion	0.0368133	1	1	CAGL0F06831g,	100	27.16	inf	0.297716	1
GO:0060003	copper ion export	0.0368133	1	1	CAGL0M08602g,	100	27.16	inf	0.297716	1
GO:0043473	pigmentation	0.0368133	1	1	CAGL0M08602g,	100	27.16	inf	0.297716	1
GO:0071279	cellular response to cobalt ion	0.0368133	1	1	CAGL0F06831g,	100	27.16	inf	0.297716	1
GO:0070778	L-aspartate transmembrane transport	0.0368133	1	1	CAGL0A01199g,	100	27.16	inf	0.297716	1
GO:0061419	positive regulation of transcription from RNA polymerase II promoter in response to hypoxia	0.0368133	1	1	CAGL0F06831g,	100	27.16	inf	0.297716	1
GO:0007623	circadian rhythm	0.0368133	1	1	CAGL0C04741g,	100	27.16	inf	0.297716	1
GO:1900404	positive regulation of DNA repair by positive regulation of transcription from RNA polymerase II promoter	0.0368133	1	1	CAGL0H02035g,	100	27.16	inf	0.297716	1
GO:0006548	histidine catabolic process	0.0368133	1	1	CAGL0G01254g,	100	27.16	inf	0.297716	1
GO:0006068	ethanol catabolic process	0.0368133	1	1	CAGL0J01441g,	100	27.16	inf	0.297716	1
GO:0006043	glucosamine catabolic process	0.0368133	1	1	CAGL0A04829g,	100	27.16	inf	0.297716	1
GO:2001280	positive regulation of unsaturated fatty acid biosynthetic process	0.0368133	1	1	CAGL0F06831g,	100	27.16	inf	0.297716	1
GO:0101026	nuclear membrane biogenesis involved in mitotic nuclear division	0.0368133	1	1	CAGL0M01364g,	100	27.16	inf	0.297716	1
GO:1901856	negative regulation of cellular respiration	0.0368133	1	1	CAGL0C04741g,	100	27.16	inf	0.297716	1
GO:0001195	maintenance of transcriptional fidelity during DNA-templated transcription elongation from RNA polymerase III promoter	0.0368133	1	1	CAGL0H08541g,	100	27.16	inf	0.297716	1
GO:0101025	nuclear membrane biogenesis	0.0368133	1	1	CAGL0M01364g,	100	27.16	inf	0.297716	1
GO:0006046	N-acetylglucosamine catabolic process	0.0368133	1	1	CAGL0A04829g,	100	27.16	inf	0.297716	1
GO:2000640	positive regulation of SREBP signaling pathway	0.0368133	1	1	CAGL0L04840g,	100	27.16	inf	0.297716	1
GO:2001171	positive regulation of ATP biosynthetic process	0.0368133	1	1	CAGL0E05566g,	100	27.16	inf	0.297716	1
GO:2001279	regulation of unsaturated fatty acid biosynthetic process	0.0368133	1	1	CAGL0F06831g,	100	27.16	inf	0.297716	1
GO:0042938	dipeptide transport	0.0368133	1	1	CAGL0G02453g,	100	27.16	inf	0.297716	1
GO:0006876	cellular cadmium ion homeostasis	0.0368133	1	1	CAGL0E01969g,	100	27.16	inf	0.297716	1
GO:0035442	dipeptide transmembrane transport	0.0368133	1	1	CAGL0G02453g,	100	27.16	inf	0.297716	1
GO:0090239	regulation of histone H4 acetylation	0.0368133	1	1	CAGL0H02035g,	100	27.16	inf	0.297716	1
GO:2000873	regulation of histone H4 acetylation involved in response to DNA damage stimulus	0.0368133	1	1	CAGL0H02035g,	100	27.16	inf	0.297716	1
GO:0043324	pigment metabolic process involved in developmental pigmentation	0.0368133	1	1	CAGL0M08602g,	100	27.16	inf	0.297716	1
GO:0046835	carbohydrate phosphorylation	0.0368133	1	1	CAGL0A04829g,	100	27.16	inf	0.297716	1
GO:0032025	response to cobalt ion	0.0368133	1	1	CAGL0F06831g,	100	27.16	inf	0.297716	1
GO:0044209	AMP salvage	0.0368133	1	1	CAGL0G07106g,	100	27.16	inf	0.297716	1
GO:0045821	positive regulation of glycolytic process	0.0368133	1	1	CAGL0E05566g,	100	27.16	inf	0.297716	1
GO:0030813	positive regulation of nucleotide catabolic process	0.0368133	1	1	CAGL0E05566g,	100	27.16	inf	0.297716	1
GO:0019558	histidine catabolic process to 2-oxoglutarate	0.0368133	1	1	CAGL0G01254g,	100	27.16	inf	0.297716	1
GO:0035568	N-terminal peptidyl-proline methylation	0.0368133	1	1	CAGL0I09240g,	100	27.16	inf	0.297716	1
GO:0043474	pigment metabolic process involved in pigmentation	0.0368133	1	1	CAGL0M08602g,	100	27.16	inf	0.297716	1
GO:0043153	entrainment of circadian clock by photoperiod	0.0368133	1	1	CAGL0C04741g,	100	27.16	inf	0.297716	1
GO:0015691	cadmium ion transport	0.0368133	1	1	CAGL0E01969g,	100	27.16	inf	0.297716	1
GO:0055073	cadmium ion homeostasis	0.0368133	1	1	CAGL0E01969g,	100	27.16	inf	0.297716	1
GO:0048066	developmental pigmentation	0.0368133	1	1	CAGL0M08602g,	100	27.16	inf	0.297716	1
GO:0010691	negative regulation of ribosomal protein gene transcription from RNA polymerase II promoter in response to nutrient levels	0.0368133	1	1	CAGL0L02475g,	100	27.16	inf	0.297716	1
GO:0034310	primary alcohol catabolic process	0.0368133	1	1	CAGL0J01441g,	100	27.16	inf	0.297716	1
GO:0051208	sequestering of calcium ion	0.0368133	1	1	CAGL0K12034g,	100	27.16	inf	0.297716	1
GO:0018016	N-terminal peptidyl-proline dimethylation	0.0368133	1	1	CAGL0I09240g,	100	27.16	inf	0.297716	1
GO:0009436	glyoxylate catabolic process	0.0368133	1	1	CAGL0J08272g,	100	27.16	inf	0.297716	1
GO:0010723	positive regulation of transcription from RNA polymerase II promoter in response to iron	0.0368133	1	1	CAGL0K08756g,	100	27.16	inf	0.297716	1
GO:0009649	entrainment of circadian clock	0.0368133	1	1	CAGL0C04741g,	100	27.16	inf	0.297716	1
GO:0036083	positive regulation of unsaturated fatty acid biosynthetic process by positive regulation of transcription from RNA polymerase II promoter	0.0368133	1	1	CAGL0F06831g,	100	27.16	inf	0.297716	1
GO:0052805	imidazole-containing compound catabolic process	0.0368133	1	1	CAGL0G01254g,	100	27.16	inf	0.297716	1
GO:0040010	positive regulation of growth rate	0.0368133	1	1	CAGL0F06809g,	100	27.16	inf	0.297716	1
GO:0009648	photoperiodism	0.0368133	1	1	CAGL0C04741g,	100	27.16	inf	0.297716	1
GO:0006164	purine nucleotide biosynthetic process	0.0380821	68	6	CAGL0A04829g,CAGL0F02563g,CAGL0G07106g,CAGL0H08327g,CAGL0K05027g,CAGL0K10780g,	8.8	2.4	2.58	0.304701	1
GO:1901607	alpha-amino acid biosynthetic process	0.0381535	86	7	CAGL0A01430g,CAGL0D00176g,CAGL0G09691g,CAGL0I09592g,CAGL0I10648g,CAGL0K10978g,CAGL0M12386g,	8.1	2.21	2.37	0.304701	1
GO:0019318	hexose metabolic process	0.0382567	35	4	CAGL0A04829g,CAGL0H08327g,CAGL0J01441g,CAGL0L10043g,	11.4	3.1	3.43	0.304701	1
GO:0051186	cofactor metabolic process	0.0406344	186	12	CAGL0A04829g,CAGL0E03652g,CAGL0F08503g,CAGL0G01254g,CAGL0H04081g,CAGL0H08327g,CAGL0J01441g,CAGL0J02794g,CAGL0J09680g,CAGL0J11484g,CAGL0K06259g,CAGL0L03630g,	6.5	1.75	1.86	0.317975	1
GO:0030026	cellular manganese ion homeostasis	0.0409315	9	2	CAGL0E01969g,CAGL0M06457g,	22.2	6.04	7.54	0.317975	1
GO:0043101	purine-containing compound salvage	0.0409315	9	2	CAGL0F02563g,CAGL0G07106g,	22.2	6.04	7.54	0.317975	1
GO:0055071	manganese ion homeostasis	0.0409315	9	2	CAGL0E01969g,CAGL0M06457g,	22.2	6.04	7.54	0.317975	1
GO:0070096	mitochondrial outer membrane translocase complex assembly	0.0409315	9	2	CAGL0D04834g,CAGL0F01221g,	22.2	6.04	7.54	0.317975	1
GO:0071826	ribonucleoprotein complex subunit organization	0.0418059	126	9	CAGL0E03289g,CAGL0F06809g,CAGL0G02255g,CAGL0G02475g,CAGL0H00957g,CAGL0I01364g,CAGL0J00957g,CAGL0J07678g,CAGL0K00671g,	7.1	1.94	2.06	0.323176	1
GO:0098660	inorganic ion transmembrane transport	0.0429777	70	6	CAGL0E01969g,CAGL0E05346g,CAGL0F08987g,CAGL0K12034g,CAGL0M06457g,CAGL0M08602g,	8.6	2.33	2.5	0.330614	1
GO:0019693	ribose phosphate metabolic process	0.0436197	127	9	CAGL0A04829g,CAGL0C02623g,CAGL0F02563g,CAGL0G07106g,CAGL0H04081g,CAGL0H08327g,CAGL0H09328g,CAGL0J01441g,CAGL0K05027g,	7.1	1.93	2.04	0.332587	1
GO:0009987	cellular process	0.043656	3748	149	CAGL0A01199g,CAGL0A01430g,CAGL0A03168g,CAGL0A03278g,CAGL0A04103g,CAGL0A04829g,CAGL0B02453g,CAGL0B03014g,CAGL0B03927g,CAGL0B04807g,CAGL0C01573g,CAGL0C02623g,CAGL0C03333g,CAGL0C04741g,CAGL0C05027g,CAGL0D00176g,CAGL0D02046g,CAGL0D02926g,CAGL0D03322g,CAGL0D04114g,CAGL0D04834g,CAGL0D05214g,CAGL0D05940g,CAGL0E01155g,CAGL0E01969g,CAGL0E01991g,CAGL0E02255g,CAGL0E02761g,CAGL0E03289g,CAGL0E03652g,CAGL0E055…	4	1.08	1.35	0.332587	1
GO:0006626	protein targeting to mitochondrion	0.0441966	53	5	CAGL0D04834g,CAGL0F01221g,CAGL0F06693g,CAGL0H06127g,CAGL0I05720g,	9.4	2.56	2.77	0.335087	1
GO:0009073	aromatic amino acid family biosynthetic process	0.0452088	22	3	CAGL0A01430g,CAGL0C01573g,CAGL0H10142g,	13.6	3.7	4.18	0.339496	1
GO:0046112	nucleobase biosynthetic process	0.0452088	22	3	CAGL0G07106g,CAGL0G09691g,CAGL0I09592g,	13.6	3.7	4.18	0.339496	1
GO:0008152	metabolic process	0.0456153	2852	117	CAGL0A01430g,CAGL0A03168g,CAGL0A03278g,CAGL0A04103g,CAGL0A04829g,CAGL0B02453g,CAGL0B03014g,CAGL0B03927g,CAGL0B04807g,CAGL0C01573g,CAGL0C02623g,CAGL0C03333g,CAGL0C04741g,CAGL0C05027g,CAGL0D00176g,CAGL0D02926g,CAGL0D04114g,CAGL0D05214g,CAGL0D05940g,CAGL0E01155g,CAGL0E01727g,CAGL0E01991g,CAGL0E02761g,CAGL0E03289g,CAGL0E03652g,CAGL0E05566g,CAGL0F00605g,CAGL0F00759g,CAGL0F01683g,CAGL0F01793g,CAGL0F025…	4.1	1.11	1.3	0.340926	1
GO:0055085	transmembrane transport	0.0473137	321	18	CAGL0A01199g,CAGL0A01782g,CAGL0A02211g,CAGL0A03212g,CAGL0A04829g,CAGL0E01969g,CAGL0E05346g,CAGL0F06693g,CAGL0F08987g,CAGL0G02453g,CAGL0H04961g,CAGL0I02178g,CAGL0I05720g,CAGL0I10747g,CAGL0K12034g,CAGL0M06457g,CAGL0M08602g,CAGL0M11104g,	5.6	1.52	1.61	0.351952	1
GO:0036003	positive regulation of transcription from RNA polymerase II promoter in response to stress	0.0495681	38	4	CAGL0C04741g,CAGL0F06831g,CAGL0K01727g,CAGL0K06259g,	10.5	2.86	3.12	0.356412	1
GO:0015749	monosaccharide transmembrane transport	0.0499474	10	2	CAGL0A02211g,CAGL0A04829g,	20	5.43	6.6	0.356412	1
GO:0006384	transcription initiation from RNA polymerase III promoter	0.0499474	10	2	CAGL0G06974g,CAGL0H08541g,	20	5.43	6.6	0.356412	1
GO:0008645	hexose transmembrane transport	0.0499474	10	2	CAGL0A02211g,CAGL0A04829g,	20	5.43	6.6	0.356412	1
GO:0010106	cellular response to iron ion starvation	0.0499474	10	2	CAGL0C03333g,CAGL0F06831g,	20	5.43	6.6	0.356412	1
GO:0006721	terpenoid metabolic process	0.0499474	10	2	CAGL0C04741g,CAGL0H04081g,	20	5.43	6.6	0.356412	1
GO:0070588	calcium ion transmembrane transport	0.0499474	10	2	CAGL0K12034g,CAGL0M06457g,	20	5.43	6.6	0.356412	1
GO:0034219	carbohydrate transmembrane transport	0.0499474	10	2	CAGL0A02211g,CAGL0A04829g,	20	5.43	6.6	0.356412	1
GO:0016114	terpenoid biosynthetic process	0.0499474	10	2	CAGL0C04741g,CAGL0H04081g,	20	5.43	6.6	0.356412	1
