# Supplementary material for: Temporal transcriptional response of Candida glabrata during macrophage infection reveals a multifaceted transcriptional regulator CgXbp1 important for macrophage response and fluconazole resistance
Source: eLife. 2024 Oct 2;13:e73832. doi: 10.7554/eLife.73832 (PMC11554308; doi:10.7554/eLife.73832)
Supplement: Supplementary file 3. [file elife-73832-supp3.xlsx]

## Sheet: Iron response genes
Supplementary file 3 - List of Iron response genes (Denecker et al., 2020) actively expressed upon macrophage infection.
Iron responsive genes	Transcribed during infection	Type	Name	Description (CGD database)
CAGL0J03212g	Yes	Type I	ALD5	Putative mitochondrial aldehyde dehydrogenase (NAD+); protein abundance increased in ace2 mutant cells
CAGL0G07106g	Yes	Type II	APT1	Putative adenine phosphoribosyltransferase; protein abundance decreased in ace2 mutant cells
CAGL0A03740g	Yes	Type I		Ortholog(s) have role in fatty acid beta-oxidation, long-chain fatty acid catabolic process and peroxisome localization
CAGL0A04499g	Yes	Type II		Ortholog(s) have electron transfer activity, iron ion binding, zinc ion binding activity, role in peptidyl-diphthamide biosynthetic process from peptidyl-histidine, tRNA wobble uridine modification and cytoplasm, nucleus localization
CAGL0A04829g	Yes	Type II		Putative hexokinase isoenzyme 2; protein differentially expressed in azole resistant strain
CAGL0B00594g	Yes	Type II		Predicted GPI-linked protein
CAGL0B00792g	Yes	Type I		Ortholog(s) have RNA binding activity, role in cytoplasmic translation and cytoplasmic stress granule, polysome localization
CAGL0C05115g	Yes	Type II	ARG1	Argininosuccinate synthetase
CAGL0F01419g	Yes	Type II	AUS1	ATP-binding cassette transporter involved in sterol uptake
CAGL0K10868g	Yes	Type II	CTA1	Putative catalase A; gene is downregulated in azole-resistant strain; regulated by oxidative stress and glucose starvation; protein abundance increased in ace2 mutant cells
CAGL0B03421g	Yes	Type I		Ortholog(s) have RNA polymerase II proximal promoter sequence-specific DNA binding, proximal promoter DNA-binding transcription activator activity, RNA polymerase II-specific activity
CAGL0C03333g	Yes	Type I		Ortholog(s) have ferric-chelate reductase activity and role in cellular response to iron ion starvation, copper ion import, intracellular sequestering of iron ion, iron assimilation by reduction and transport
CAGL0D06424g	Yes	Type II	ACO1	Putative aconitate hydratase
CAGL0A01199g	Yes	Type I	DIP5	Putative dicarboxylic amino acid permease
CAGL0C05027g	Yes	Type I		Ortholog(s) have role in acetate catabolic process, alcohol metabolic process, carnitine metabolic process, cellular respiration and cytosol, mitochondrion localization
CAGL0M07656g	Yes	Type I	ERG5	Putative C22 sterol desaturase
CAGL0D01958g	Yes	Type II		Ortholog(s) have succinate dehydrogenase (ubiquinone) activity and role in cellular respiration, protein import into mitochondrial inner membrane
CAGL0D02134g	Yes	Type I		Ortholog of S. cerevisiae : YKL133C and Saccharomyces cerevisiae S288C : YKL133C
CAGL0D02640g	Yes	Type II		Has domain(s) with predicted transmembrane transporter activity, role in transmembrane transport and integral component of membrane, membrane localization
CAGL0D03982g	Yes	Type II		Ortholog(s) have 1-pyrroline-5-carboxylate dehydrogenase activity, role in glutamate biosynthetic process, hyphal growth, proline catabolic process to glutamate and mitochondrial matrix localization
CAGL0D05082g	Yes	Type I		Protein of unknown function
CAGL0L03267g	Yes	Type II	GAP1	Ortholog(s) have L-proline transmembrane transporter activity, polyamine transmembrane transporter activity and role in amino acid transmembrane transport, nitrogen utilization, polyamine transport
CAGL0G09977g	Yes	Type II	GDB1	Ortholog(s) have 4-alpha-glucanotransferase activity, amylo-alpha-1,6-glucosidase activity and role in glycogen catabolic process
CAGL0D06600g	Yes	Type I		Ortholog(s) have protein serine/threonine kinase activity, protein tyrosine kinase activity and role in negative regulation of transcription by RNA polymerase III, peptidyl-serine phosphorylation, protein autophosphorylation
CAGL0E01287g	Yes	Type II		Ortholog(s) have role in 2-oxoglutarate metabolic process, mitochondrial genome maintenance and mitochondrial nucleoid, mitochondrial oxoglutarate dehydrogenase complex localization
CAGL0F00605g	Yes	Type I	GLK1	Aldohexose specific glucokinase
CAGL0E01991g	Yes	Type II		Ortholog(s) have structural constituent of ribosome activity, role in rRNA export from nucleus, ribosomal small subunit biogenesis and cytosolic small ribosomal subunit localization
CAGL0E02013g	Yes	Type II		Ortholog(s) have cytosolic large ribosomal subunit localization
CAGL0E02255g	Yes	Type II		Ortholog(s) have role in fungal-type cell wall organization and extrinsic component of plasma membrane localization
CAGL0F00407g	Yes	Type II		Ortholog(s) have deoxyhypusine monooxygenase activity
CAGL0E03938g	Yes	Type II		Ortholog(s) have role in maturation of LSU-rRNA and cytosolic large ribosomal subunit localization
CAGL0K05357g	Yes	Type I	GLN1	Ortholog(s) have glutamate-ammonia ligase activity, role in ammonia assimilation cycle, glutamine biosynthetic process and nuclear periphery localization
CAGL0E05170g	Yes	Type II	GRE2(A)	Putative methylglyoxal reductase (NADPH-dependent)
CAGL0E04548g	Yes	Type II		Ortholog of S. cerevisiae : YOR020W-A and Saccharomyces cerevisiae S288C : YOR020W-A
CAGL0E04554g	Yes	Type II		Putative protein; gene is upregulated in azole-resistant strain
CAGL0L00759g	Yes	Type II	HIS1	ATP phosphoribosyltransferase; protein abundance increased in ace2 mutant cells
CAGL0E05346g	Yes	Type II		Ortholog(s) have fungal-type vacuole membrane, vacuolar proton-transporting V-type ATPase, V1 domain localization
CAGL0E05456g	Yes	Type II		Ortholog of S. cerevisiae : YOR338W, C. albicans SC5314 : C2_09880C_A, C. dubliniensis CD36 : Cd36_23960, C. parapsilosis CDC317 : CPAR2_407140 and Candida tenuis NRRL Y-1498 : CANTEDRAFT_115655
CAGL0E05654g	Yes	Type II		Ortholog(s) have phosphatidylglycerol phospholipase C activity, role in cell-abiotic substrate adhesion, phosphatidylglycerol catabolic process and lipid droplet, mitochondrion localization
CAGL0E06424g	Yes	Type II		Ortholog(s) have cytochrome-b5 reductase activity, acting on NAD(P)H activity and role in cellular response to oxidative stress, ergosterol biosynthetic process
CAGL0F00231g	Yes	Type II		Ortholog(s) have inorganic phosphate transmembrane transporter activity, role in phosphate ion transmembrane transport and integral component of mitochondrial inner membrane, plasma membrane localization
CAGL0F02563g	Yes	Type II	HPT1	Putative hypoxanthine guanine phosphoribosyl transferase
CAGL0F01045g	Yes	Type II		Ortholog(s) have role in rRNA export from nucleus
CAGL0J04202g	Yes	Type II	HSP12	Heat shock protein; gene is upregulated in azole-resistant strain; expression upregulated in biofilm vs planktonic cell culture
CAGL0E04334g	Yes	Type I	ERG11	Putative cytochrome P-450 lanosterol 14-alpha-demethylase; target enzyme of azole antifungal drugs; increased protein abundance in azole resistant strain
CAGL0L06666g	Yes	Type II	YHB1	Putative flavohemoglobin, involved in nitric oxide detoxification
CAGL0F06413g	Yes	Type II	FET3	Putative copper ferroxidase involved in iron uptake
CAGL0F03927g	Yes	Type I		Ortholog(s) have GMP synthase (glutamine-hydrolyzing) activity and role in GMP biosynthetic process
CAGL0F04191g	Yes	Type II		Ortholog of S. cerevisiae : YBL029C-A, C. albicans SC5314 : C1_02060W_A, C. dubliniensis CD36 : Cd36_01920, C. parapsilosis CDC317 : CPAR2_108200 and Candida tenuis NRRL Y-1498 : CANTEDRAFT_114571
CAGL0F04213g	Yes	Type I		Ortholog(s) have ATP:ADP antiporter activity
CAGL0F05687g	Yes	Type II		Ortholog of S. cerevisiae : SND1 and Saccharomyces cerevisiae S288C : YDR186C
CAGL0F05863g	Yes	Type II		Ortholog(s) have succinate dehydrogenase (ubiquinone) activity, role in cellular respiration and plasma membrane localization
CAGL0H02491g	Yes	Type I		Ortholog(s) have cytochrome-c oxidase activity, role in mitochondrial electron transport, cytochrome c to oxygen and mitochondrial respiratory chain complex IV, plasma membrane localization
CAGL0F07117g	Yes	Type I		Putative subunit of the heterotrimeric G protein; gene is upregulated in azole-resistant strain
CAGL0A03905g	Yes	Type II	HMX1	Ortholog(s) have heme oxygenase (decyclizing) activity and role in cellular iron ion homeostasis, heme catabolic process, response to carbon monoxide, response to oxidative stress
CAGL0F08745g	Yes	Type II		Ortholog(s) have role in cellular response to desiccation and cytoplasm localization
CAGL0G01122g	Yes	Type II		Putative protein; gene is upregulated in azole-resistant strain
CAGL0G01826g	Yes	Type II		Ortholog(s) have role in ribosomal large subunit assembly and cytosolic large ribosomal subunit localization
CAGL0I06050g	Yes	Type II	INO1	Putative inositol 1-phosphate synthase; regulated by the transcriptional activators Ino2p and Ino4p; protein differentially expressed in azole resistant strain
CAGL0A03542g	Yes	Type I	COX12	Cytochrome c oxidase
CAGL0G02849g	Yes	Type II		Ortholog(s) have endoplasmic reticulum, nuclear envelope localization
CAGL0G02585g	Yes	Type II	LYS12	Homo-isocitrate dehydrogenase
CAGL0G03883g	Yes	Type I		Ortholog(s) have ADP binding, ATP binding, ATPase activity, coupled, chaperone binding, misfolded protein binding, unfolded protein binding activity
CAGL0J09240g	Yes	Type I	LYS21	Homocitrate synthase; protein abundance increased in ace2 mutant cells
CAGL0G05830g	Yes	Type II		Ortholog(s) have DNA binding activity
CAGL0G06248g	Yes	Type I		Ortholog(s) have role in maturation of 5.8S rRNA from tricistronic rRNA transcript (SSU-rRNA, 5.8S rRNA, LSU-rRNA), maturation of LSU-rRNA from tricistronic rRNA transcript (SSU-rRNA, 5.8S rRNA, LSU-rRNA)
CAGL0G06490g	Yes	Type I		Ortholog(s) have role in ribosome biogenesis and small-subunit processome localization
CAGL0G06732g	Yes	Type I		Ortholog(s) have 2-isopropylmalate synthase activity, role in leucine biosynthetic process and mitochondrion localization
CAGL0L05236g	Yes	Type I	MDH1	Malate dehydrogenase
CAGL0G08019g	Yes	Type II		Ortholog(s) have role in cellular response to biotic stimulus, cellular response to starvation and filamentous growth of a population of unicellular organisms in response to biotic stimulus, more
CAGL0G08734g	Yes	Type I		Has domain(s) with predicted rRNA binding, structural constituent of ribosome activity, role in translation and ribosome localization
CAGL0G09064g	Yes	Type II		Ortholog(s) have role in glycerol biosynthetic process and cytosol, nucleus localization
CAGL0G09130g	Yes	Type II		Ortholog(s) have role in maturation of LSU-rRNA and cytosolic large ribosomal subunit, nucleolus localization
CAGL0D06402g	Yes	Type II	MET15	O-acetyl homoserine sulfhydrylase (OAHSH), ortholog of S. cerevisiae MET17; required for utilization of inorganic sulfate as sulfur source; able to utilize cystine as a sulfur source while S. cerevisiae met15 mutants are unable to do so
CAGL0I01408g	Yes	Type II	CYC1	Ortholog(s) have electron transfer activity, role in mitochondrial electron transport, cytochrome c to oxygen, mitochondrial electron transport, ubiquinol to cytochrome c and mitochondrial intermembrane space localization
CAGL0H00418g	Yes	Type II		Protein of unknown function
CAGL0H02101g	Yes	Type II		Ortholog(s) have role in RNA metabolic process and fungal biofilm matrix localization
CAGL0K08668g	Yes	Type I	MET28	bZIP domain-containing protein
CAGL0K02893g	Yes	Type II		Ortholog(s) have ubiquinol-cytochrome-c reductase activity, role in aerobic respiration, mitochondrial electron transport, ubiquinol to cytochrome c and mitochondrial respiratory chain complex III localization
CAGL0H03993g	Yes	Type II		Ortholog(s) have citrate (Si)-synthase activity, role in acetyl-CoA catabolic process, tricarboxylic acid cycle and glyoxysome, mitochondrion localization
CAGL0H09592g	Yes	Type II		Putative GPI-linked cell wall protein
CAGL0H09614g	Yes	Type I		Putative GPI-linked cell wall protein
CAGL0H09944g	Yes	Type II		Ortholog(s) have 2-alkenal reductase [NAD(P)] activity, AU-rich element binding, NADPH:quinone reductase activity and role in cellular response to oxidative stress
CAGL0H09966g	Yes	Type II		Ortholog of S. cerevisiae : FMP23 and Saccharomyces cerevisiae S288C : YBR047W
CAGL0I00792g	Yes	Type II		Ortholog(s) have role in maturation of SSU-rRNA from tricistronic rRNA transcript (SSU-rRNA, 5.8S rRNA, LSU-rRNA)
CAGL0L10406g	Yes	Type II	CYT1	Ortholog(s) have electron transporter, transferring electrons within CoQH2-cytochrome c reductase complex activity and role in mitochondrial electron transport, ubiquinol to cytochrome c
CAGL0I02134g	Yes	Type I	PEX21B	Ortholog(s) have role in protein import into peroxisome matrix and cytosol, peroxisome localization
CAGL0I03234g	Yes	Type II		Ortholog(s) have U3 snoRNA binding, U4 snRNA binding activity and role in mRNA splicing, via spliceosome, maturation of SSU-rRNA from tricistronic rRNA transcript (SSU-rRNA, 5.8S rRNA, LSU-rRNA)
CAGL0I04328g	Yes	Type II		Ortholog of S. cerevisiae : YJL133C-A and Saccharomyces cerevisiae S288C : YJL133C-A
CAGL0B02475g	Yes	Type II	PHO84	Ortholog(s) have inorganic phosphate transmembrane transporter activity, manganese ion transmembrane transporter activity, phosphate:proton symporter activity, selenite:proton symporter activity
CAGL0I05934g	Yes	Type II		Ortholog(s) have ubiquitin-protein transferase regulator activity and role in cellular response to water deprivation, stress-induced homeostatically regulated protein degradation pathway
CAGL0J10164g	Yes	Type II	RPL16A	Putative ribosomal protein
CAGL0I07491g	Yes	Type II		Ortholog(s) have role in cellular zinc ion homeostasis
CAGL0B04675g	Yes	Type II		Ortholog(s) have RNA binding, endoribonuclease activity, ribosome binding activity
CAGL0I08305g	Yes	Type II		Ortholog(s) have carnitine O-acetyltransferase activity
CAGL0J00451g	Yes	Type II		Putative glyceraldehyde-3-phosphate dehydrogenase; protein differentially expressed in azole resistant strain; expression downregulated in biofilm vs planktonic cell culture
CAGL0J00847g	Yes	Type II		Ortholog(s) have succinate dehydrogenase (ubiquinone) activity, role in cellular respiration and mitochondrion localization
CAGL0J03080g	Yes	Type I		Ortholog(s) have role in energy reserve metabolic process and cell periphery localization
CAGL0B01122g	Yes	Type I	SAM1	S-adenosylmethionine synthetase
CAGL0J03234g	Yes	Type II		Ortholog(s) have role in maturation of SSU-rRNA from tricistronic rRNA transcript (SSU-rRNA, 5.8S rRNA, LSU-rRNA)
CAGL0H03487g	Yes	Type II	AFT1	Putative RNA polymerase II transcription factor, involved in regulation of iron acquisition genes; required for growth under iron depletion
CAGL0J03916g	Yes	Type I		Ortholog(s) have oxysterol binding, sterol transporter activity and role in endocytosis, exocytosis, maintenance of cell polarity, piecemeal microautophagy of the nucleus, sterol transport
CAGL0K04279g	Yes	Type I	SCM4	Ortholog of S. cerevisiae : SCM4 and Saccharomyces cerevisiae S288C : YGR049W
CAGL0J04268g	Yes	Type I		Ortholog(s) have acetate CoA-transferase activity, acetyl-CoA hydrolase activity, succinyl-CoA hydrolase activity, role in propionate metabolic process, methylcitrate cycle, response to acetate and glyoxysome, mitochondrion localization
CAGL0J05082g	Yes	Type I		Has domain(s) with predicted ATP binding, protein kinase activity, protein tyrosine kinase activity and role in protein phosphorylation
CAGL0J05390g	Yes	Type I		Protein of unknown function
CAGL0J06374g	Yes	Type II		Has domain(s) with predicted structural constituent of ribosome activity, role in translational elongation and ribosome localization
CAGL0K08756g	Yes	Type I	AP5	bZIP domain-containing protein
CAGL0F03399g	Yes	Type II	SCS7	Ortholog(s) have fatty acid alpha-hydroxylase activity, role in mannosyl-inositol phosphorylceramide metabolic process and membrane localization
CAGL0G02409g	Yes	Type II	SRP4	Ortholog(s) have nucleolus localization
CAGL0C00275g	Yes	Type II	HSP31	Putative cysteine protease; protein differentially expressed in azole resistant strain; gene is upregulated in azole-resistant strain
CAGL0K01859g	Yes	Type II		Ortholog(s) have histone-glutamine methyltransferase activity, mRNA binding, rRNA methyltransferase activity and role in box C/D snoRNA 3'-end processing, histone glutamine methylation, rRNA methylation
CAGL0M08602g	Yes	Type II		Ortholog(s) have cation-transporting ATPase activity, copper ion binding activity and role in cellular iron ion homeostasis, copper ion export, pigment metabolic process involved in developmental pigmentation
CAGL0K03421g	Yes	Type II		Ortholog(s) have phosphoglucomutase activity
CAGL0K03459g	Yes	Type II		Ortholog of S. cerevisiae : SPG4 and Saccharomyces cerevisiae S288C : YMR107W
CAGL0F01463g	Yes	Type II	TIR1	Putative GPI-linked cell wall mannoprotein of the Srp1p/Tip1p family
CAGL0G03289g	Yes	Type I	SSA3	Heat shock protein of the HSP70 family
CAGL0K06061g	Yes	Type II		Ortholog(s) have structural constituent of ribosome activity
CAGL0G10175g	Yes	Type I	AWP6	Adhesin-like protein; identified in cell wall extracts by mass spectrometry; belongs to adhesin cluster IV; predicted GPI anchor
CAGL0K06567g	Yes	Type II		Ortholog(s) have preribosome, large subunit precursor localization
CAGL0K07205g	Yes	Type II		Protein of unknown function
CAGL0I01166g	Yes	Type II	TRR1	Thioredoxin reductase (NADPH)
CAGL0K06259g	Yes	Type II	TSA1	Thiol-specific antioxidant protein; predicted thioredoxin peroxidase involved in oxidative stress response; protein abundance decreased in ace2 mutant cells
CAGL0K10824g	Yes	Type II		Ortholog of S. cerevisiae : YLR149C, C. albicans SC5314 : C7_03280C_A, C. dubliniensis CD36 : Cd36_72930, C. parapsilosis CDC317 : CPAR2_704080 and Candida tenuis NRRL Y-1498 : CANTEDRAFT_112372
CAGL0F07865g	Yes	Type I	UPC2B	Putative Zn(2)-Cys(6) binuclear cluster transcriptional regulator of ergosterol biosynthesis
CAGL0L00429g	Yes	Type I		Ortholog(s) have glycine dehydrogenase (decarboxylating) activity and role in glycine decarboxylation via glycine cleavage system, one-carbon metabolic process
CAGL0L00649g	Yes	Type I		Acetyl-coenzyme A synthetase
CAGL0E01793g	Yes	Type II	YPS6	Putative aspartic protease; predicted GPI-anchor; member of a YPS gene cluster that is required for virulence in mice; expression induced at high temperature
CAGL0L01551g	Yes	Type II		Ortholog(s) have role in ascospore formation, cellular response to biotic stimulus, cellular response to chemical stimulus, cellular response to glucose starvation and cellular response to neutral pH, more
CAGL0L02167g	Yes	Type II		Ortholog(s) have 3-hydroxyacyl-CoA dehydrogenase activity, 3-hydroxybutyryl-CoA epimerase activity, enoyl-CoA hydratase activity
CAGL0E04092g	Yes	Type I	SIT1	Putative siderophore-iron transporter with 14 transmembrane domains; required for iron-dependent survival in macrophages; mRNA levels elevated under iron deficiency conditions; plasma membrane localized
CAGL0L03828g	Yes	Type II		Ortholog(s) have electron transfer activity, role in ergosterol biosynthetic process and endoplasmic reticulum membrane localization
CAGL0L04510g	Yes	Type I		Ortholog(s) have structural constituent of ribosome activity
CAGL0L05258g	Yes	Type II		Ortholog(s) have sulfiredoxin activity and role in cellular protein localization, cellular response to oxidative stress
CAGL0L05500g	Yes	Type I		Ortholog(s) have role in ribosomal large subunit biogenesis and cytoplasm, nucleus localization
CAGL0F00187g	Yes	Type II	FET4	Has domain(s) with predicted role in transmembrane transport
CAGL0L07502g	Yes	Type II		Putative GPI-linked cell wall protein
CAGL0L08114g	Yes	Type II		Has domain(s) with predicted structural constituent of ribosome activity, role in translation and ribosome localization
CAGL0L08118g	Yes	Type I		Ortholog(s) have mRNA binding activity, role in maturation of SSU-rRNA from tricistronic rRNA transcript (SSU-rRNA, 5.8S rRNA, LSU-rRNA), ribosomal small subunit assembly and small-subunit processome localization
CAGL0I06743g	Yes	Type I	FTR1	Putative ferrous iron transmembrane transporter involved in iron uptake
CAGL0L10164g	Yes	Type II		Ortholog(s) have role in translational termination and nucleus localization
CAGL0M04873g	Yes	Type II		Ortholog(s) have role in rRNA export from nucleus and cell surface localization
CAGL0M05665g	Yes	Type I		Ortholog(s) have endopeptidase inhibitor activity, role in regulation of proteolysis, vacuole fusion, non-autophagic and fungal-type vacuole localization
CAGL0M05951g	Yes	Type II		Has domain(s) with predicted oxidoreductase activity, role in oxidation-reduction process and mitochondrion localization
CAGL0M05995g	Yes	Type II		Ortholog(s) have lipid droplet localization
CAGL0M06633g	Yes	Type I		Protein of unknown function
CAGL0I10147g	Yes	Type II	PWP1	Protein with 32 tandem repeats; putative adhesin-like protein; belongs to adhesin cluster II
CAGL0K00110g	Yes	Type II	AWP2	Putative adhesin; identified in cell wall extracts by mass spectrometry; belongs to adhesin cluster V; predicted GPI-anchor
CAGL0I02508g	Yes	Type I		Ortholog(s) have copper ion transmembrane transporter activity and role in cellular copper ion homeostasis, copper ion import, intracellular copper ion transport
CAGL0M10241g	Yes	Type I		Ortholog(s) have RNA binding activity, role in macroautophagy and cytosolic large ribosomal subunit localization
CAGL0M11000g	Yes	Type II		Ortholog(s) have cytosol localization
CAGL0M11110g	Yes	Type II		Ortholog(s) have role in rRNA processing and preribosome, large subunit precursor localization
CAGL0M11902g	Yes	Type II		Ortholog of S. cerevisiae : FUN19 and Saccharomyces cerevisiae S288C : YAL034C
CAGL0M12551g	Yes	Type I		Ortholog(s) have role in energy reserve metabolic process
CAGL0A02299g	No	Type II		Protein of unknown function
CAGL0A02816g	No	Type I		Putative 2-methylbutyraldehyde reductase; gene is upregulated in azole-resistant strain
CAGL0I07887g	No	Type II		Ortholog(s) have protein binding, bridging activity and role in protein localization by the Cvt pathway, protein processing, protein-containing complex localization, ubiquitin-dependent ERAD pathway, vesicle organization
CAGL0C01287g	No	Type II		Ortholog(s) have role in DNA transport, cell redox homeostasis, positive regulation of protein serine/threonine kinase activity and mitochondrial outer membrane localization
CAGL0D00198g	No	Type I		Ortholog(s) have (R,R)-butanediol dehydrogenase activity and role in butanediol biosynthetic process
CAGL0D00352g	No	Type II		Ortholog(s) have ATPase activity, coupled to transmembrane movement of substances activity, role in fatty acid transmembrane transport and integral component of peroxisomal membrane localization
CAGL0D00880g	No	Type II		Ortholog(s) have ribonucleoprotein complex binding activity and role in endonucleolytic cleavage to generate mature 3'-end of SSU-rRNA from (SSU-rRNA, 5.8S rRNA, LSU-rRNA)
CAGL0G05698g	No	Type II	GDH2	Ortholog(s) have glutamate dehydrogenase (NAD+) activity and role in nitrogen compound metabolic process
CAGL0E02651g	No	Type II		Has domain(s) with predicted identical protein binding, serine-type endopeptidase activity and role in negative regulation of catalytic activity, proteolysis
CAGL0E05588g	No	Type I		Ortholog(s) have DNA-directed DNA polymerase activity, deoxycytidyl transferase activity and role in error-free translesion synthesis, error-prone translesion synthesis
CAGL0E06116g	No	Type I		Ortholog(s) have role in positive regulation of transcription by RNA polymerase II and cytosol, nuclear chromatin localization
CAGL0I04730g	No	Type II	HMT1	Putative hnRNP arginine N-methyltransferase
CAGL0E03850g	No	Type I		Ortholog(s) have mitochondrion localization
CAGL0F04565g	No	Type I		Ortholog(s) have ubiquinol-cytochrome-c reductase activity, role in aerobic respiration and mitochondrial respiratory chain complex III localization
CAGL0F04917g	No	Type II		Putative regulatory subunit for protein phosphatase; gene is upregulated in azole-resistant strain
CAGL0F05709g	No	Type I		Ortholog(s) have role in bipolar cellular bud site selection, cellular cation homeostasis and nucleus localization
CAGL0F08217g	No	Type II		Ortholog(s) have cytoplasmic stress granule localization
CAGL0G01166g	No	Type II		Protein of unknown function
CAGL0H00682g	No	Type II		Has domain(s) with predicted mannosyl-oligosaccharide glucosidase activity and role in oligosaccharide metabolic process
CAGL0H04125g	No	Type II		Ortholog(s) have D-arabinono-1,4-lactone oxidase activity
CAGL0H08261g	No	Type II		Ortholog(s) have role in autophagy of mitochondrion
CAGL0I00286g	No	Type I		Has domain(s) with predicted transmembrane transporter activity, role in transmembrane transport and integral component of membrane, membrane localization
CAGL0I01276g	No	Type II		Ortholog(s) have cytoplasm, nucleus localization
CAGL0J03762g	No	Type II	MET7	Ortholog(s) have tetrahydrofolylpolyglutamate synthase activity, role in one-carbon metabolic process, regulation of DNA methylation and mitochondrion localization
CAGL0K06677g	No	Type II	MET8	Putative bifunctional dehydrogenase and ferrochelatase; gene is upregulated in azole-resistant strain
CAGL0I02530g	No	Type II		Ortholog(s) have N,N-dimethylaniline monooxygenase activity, role in protein folding and endoplasmic reticulum membrane localization
CAGL0I04048g	No	Type II		Ortholog(s) have fructose 1,6-bisphosphate 1-phosphatase activity, role in carbon utilization, cellular response to glucose starvation and intracellular localization
CAGL0I04752g	No	Type II		Ortholog(s) have phosphatidate cytidylyltransferase activity
CAGL0I05060g	No	Type I		Ortholog(s) have sequence-specific DNA binding activity and role in chromatin silencing at rDNA, chromatin silencing at telomere, transfer RNA gene-mediated silencing
CAGL0I06006g	No	Type II		Ortholog(s) have RNA polymerase I activity, role in nucleolar large rRNA transcription by RNA polymerase I, transcription elongation from RNA polymerase I promoter and RNA polymerase I complex localization
CAGL0I06644g	No	Type II		Putative GPI-linked cell wall protein
CAGL0L10142g	No	Type II	RSB1	Putative sphingolipid flippase; gene is upregulated in azole-resistant strain
CAGL0I07969g	No	Type I		Ortholog(s) have role in ATP synthesis coupled proton transport, protein complex oligomerization and mitochondrial proton-transporting ATP synthase complex, coupling factor F(o), plasma membrane localization
CAGL0I08547g	No	Type II		Ortholog of S. cerevisiae : YER156C, C. albicans SC5314 : C1_01910W_A, C. dubliniensis CD36 : Cd36_01750, C. parapsilosis CDC317 : CPAR2_108260 and Candida tenuis NRRL Y-1498 : CANTEDRAFT_115475
CAGL0I09702g	No	Type II		Ortholog(s) have riboflavin transmembrane transporter activity, role in riboflavin transport and plasma membrane localization
CAGL0K00715g	No	Type I	RTA1	Putative protein involved in 7-aminocholesterol resistance; gene is upregulated in azole-resistant strain
CAGL0I10670g	No	Type II		Protein of unknown function
CAGL0J00649g	No	Type II		Ortholog(s) have homoserine kinase activity and role in homoserine metabolic process, threonine biosynthetic process
CAGL0J04466g	No	Type I		Ortholog(s) have role in fungal-type cell wall organization, protein complex oligomerization and cell cortex of cell tip, membrane raft, plasma membrane localization
CAGL0J04576g	No	Type II		Has domain(s) with predicted role in peptidyl-diphthamide biosynthetic process from peptidyl-histidine and cytoplasm localization
CAGL0J07766g	No	Type II		Ortholog(s) have RNA polymerase I activity, role in nucleolar large rRNA transcription by RNA polymerase I, transcription elongation from RNA polymerase I promoter and RNA polymerase I complex localization
CAGL0J10362g	No	Type II		Ortholog(s) have GMP 5'-nucleotidase activity and role in deoxyribonucleoside monophosphate catabolic process
CAGL0K01771g	No	Type I		Has domain(s) with predicted transferase activity, transferring acyl groups activity
CAGL0K02409g	No	Type I		Ortholog(s) have proton-transporting ATP synthase activity, rotational mechanism activity and role in ATP synthesis coupled proton transport, cristae formation, protein complex oligomerization
CAGL0K02629g	No	Type II		Ortholog(s) have intracellular localization
CAGL0K05687g	No	Type II		Has domain(s) with predicted FMN binding, catalytic activity, oxidoreductase activity and role in oxidation-reduction process
CAGL0M08184g	No	Type II	STE3	Putative a-factor pheromone receptor
CAGL0K08338g	No	Type I		Protein of unknown function
CAGL0K09042g	No	Type II		Ortholog(s) have ribosome localization
CAGL0L01771g	No	Type I		Ortholog(s) have DNA-binding transcription factor activity, role in positive regulation of pseudohyphal growth, positive regulation of transcription by RNA polymerase II and nucleus localization
CAGL0E01815g	No	Type II	YPS8	Putative aspartic protease; predicted GPI-anchor; member of a YPS gene cluster that is required for virulence in mice; induced in response to low pH and high temperature
CAGL0L06776g	No	Type I		Has domain(s) with predicted DNA-binding transcription factor activity, sequence-specific DNA binding, zinc ion binding activity and role in regulation of transcription, DNA-templated
CAGL0L06864g	No	Type II		Putative protein related to ECM3; gene is downregulated in azole-resistant strain
CAGL0L08756g	No	Type II		Ortholog(s) have nucleus localization
CAGL0L09086g	No	Type II		Ortholog(s) have 2-methylcitrate synthase activity, citrate (Si)-synthase activity, role in propionate catabolic process, 2-methylcitrate cycle, tricarboxylic acid cycle and mitochondrion localization
CAGL0L09273g	No	Type II		Ortholog(s) have isocitrate lyase activity, methylisocitrate lyase activity, role in propionate catabolic process, 2-methylcitrate cycle and mitochondrial matrix localization
CAGL0B02904g	No	Type II	BMT6	Beta mannosyltransferase
CAGL0L10582g	No	Type II		Has domain(s) with predicted mannosyl-oligosaccharide glucosidase activity and role in oligosaccharide metabolic process
CAGL0L13156g	No	Type II		Ortholog(s) have enzyme inhibitor activity, role in ubiquitin recycling and endosome localization
CAGL0M05775g	No	Type II		Has domain(s) with predicted RNA binding activity
