# Supplementary material for: Temporal transcriptional response of Candida glabrata during macrophage infection reveals a multifaceted transcriptional regulator CgXbp1 important for macrophage response and fluconazole resistance
Source: eLife. 2024 Oct 2;13:e73832. doi: 10.7554/eLife.73832 (PMC11554308; doi:10.7554/eLife.73832)
Supplement: Supplementary file 4. [file elife-73832-supp4.xlsx]

## Sheet: PathoYeastract AllTranscribedTF
Supplementary File 4 - Gene regulatory associations between indicated TFs and the macrophage infection induced genes reported in the PathoYeastract database
No. of genes previously shown to associate with the TF reported in PathoYeastract database						17	121	13	225	2	78	9	2	2	29	62
						Aft1p	Ap1p	Ap5p	Haa1p	Hap4p	Hap5p	Msn4p	Upc2bp	Yap3bp	Yap6p	Yap7p
						ACO1	ACP1	ACO1	ADH1	ATP2	ACO1	CAGL0E00803g	AUS1	CAGL0K11858g	CAGL0C02519g	AWP13
						SMF3	AHP1	CAGL0C03223g	APT1	COX12	ARG1	CAGL0G06138g	TIR3	CAGL0K11880g	CAGL0C03740g	CAGL0B03421g
						HMX1	ALD5	CAGL0G03905g	ARG1		ASN2	CAGL0H08844g			CAGL0D00682g	CAGL0B03685g
						CTH2	AQY1	CAGL0G08063g	ASN2		ATP1	CAGL0J06050g			CAGL0D02134g	CAGL0C02519g
						ISA1	ARO3	GRX4	AWP12		ATP16	CAGL0L11132g			CAGL0D05566g	CAGL0C02827g
						FET3	AWP2	CAGL0H00418g	AWP13		ATP2	EPA2			CAGL0G04895g	CAGL0C03740g
						IDH1	CAGL0A01089g	CAGL0H02563g	BAT1		ATP7	HSP12			CAGL0G07667g	CAGL0C04785g
						FTR1	CAGL0A04829g	CAGL0H09658g	BMH1(A)		BMH1(A)	PHM8			CAGL0G08019g	CAGL0D02728g
						IDH2	CAGL0B00836g	CAGL0J09680g	BMH1(B)		CAGL0A01045g	TPS2			CAGL0H00704g	CAGL0E01353g
						FTH1	CAGL0C02365g	CAGL0K05813g	BMT1		CAGL0A01111g				CAGL0H04499g	CAGL0E01991g
						COX6	CAGL0C02519g	CAGL0L11990g	CAGL0A01650g		CAGL0A03036g				CAGL0I00484g	CAGL0E04548g
						CTA1	CAGL0C03740g	CAGL0M11104g	CAGL0A02002g		SMF3				CAGL0I02574g	CAGL0E04554g
						CYC1	CAGL0C04873g	COX12	CAGL0B01100g		CAGL0B00440g				CAGL0I04686g	CAGL0F03003g
						CYT1	SNF7		CAGL0B02431g		CAGL0B02431g				CAGL0I09086g	CAGL0F07117g
						ERG11	CAGL0D01958g		CAGL0B03421g		CAGL0B04917g				CAGL0J03960g	CAGL0F07953g
						HEM15	CAGL0D04136g		CAGL0B03817g		CAGL0C01325g				CAGL0J04004g	CAGL0G02937g
						SIT1	CAGL0D05082g		CAGL0B04675g		CAGL0C01793g				CAGL0J04554g	CAGL0G04895g
							CAGL0E00803g		CAGL0C01551g		CAGL0C02623g				CAGL0J09922g	CAGL0G05269g
							CAGL0F00407g		CAGL0C01793g		CAGL0C03223g				CAGL0K05071g	CAGL0G07667g
							CAGL0F04257g		CAGL0C02365g		CAGL0D00176g				CAGL0K07205g	CAGL0H06105g
							CAGL0F04279g		CAGL0C02519g		SNF7				CAGL0L02453g	CAGL0H09130g
							CAGL0F04895g		CAGL0C02739g		CAGL0D01958g				CAGL0L09911g	CAGL0I02574g
							CAGL0F07359g		CAGL0C03740g		CAGL0D05192g				CAGL0M01716g	SUT1
							CAGL0F08745g		CAGL0C04136g		CAGL0E00231g				CAGL0M11660g	CAGL0I07447g
							CAGL0G01122g		CAGL0C04785g		CAGL0E01287g				EPA2	CAGL0I09086g
							CAGL0G03883g		CAGL0C05027g		ISA1				FCY2	CAGL0I09856g
							CAGL0G05269g		CAGL0D01980g		CAGL0E04356g				GPD2	CAGL0J03960g
							CAGL0G07271g		CAGL0D03322g		CAGL0E06424g				STR3	CAGL0J04004g
							CAGL0H00704g		CAGL0D05280g		FET4				YPS11	CAGL0J05159g
							CAGL0H02387g		CAGL0D05566g		CAGL0F04213g					CAGL0J07568g
							CAGL0H03707g		CAGL0E00803g		CAGL0F04807g					CAGL0J09680g
							CAGL0H06105g		CAGL0E00869g		CAGL0F04829g					GLN1
							CAGL0H10010g		CTH2		CAGL0F05115g					CAGL0K05813g
							CAGL0I00726g		CAGL0E01353g		CAGL0F05863g					CAGL0K07007g
							CAGL0I00748g		CAGL0E01969g		CAGL0G03905g					CAGL0K10978g
							CAGL0I02574g		CAGL0E03025g		GRX4					CAGL0L02453g
							CAGL0I04328g		CAGL0E03245g		CAGL0G08712g					CAGL0L05742g
							CAGL0I05610g		CAGL0E03289g		CAGL0G10153g					CAGL0L09911g
							CAGL0I09394g		ISA1		CAGL0H01397g					CAGL0M01716g
							CAGL0J00451g		CAGL0E04356g		CAGL0H02491g					CAGL0M08624g
							CAGL0J01331g		CAGL0E04548g		CAGL0H03993g					CAGL0M08646g
							CAGL0J04048g		CAGL0E04774g		CAGL0H05489g					CAGL0M09207g
							CAGL0J06402g		CAGL0E05566g		CAGL0H06699g					CAGL0M09229g
							CAGL0J08316g		CAGL0E06072g		CAGL0H09328g					CAGL0M11726g
							CAGL0J09680g		FET4		CAGL0I00572g					EPA1
							CAGL0J10494g		CAGL0F01045g		CAGL0I02574g					EPA11
							CAGL0K04367g		CAGL0F01749g		CAGL0I04686g					ERG11
							CAGL0K05071g		CAGL0F03003g		CAGL0I06270g					FCY2
							CAGL0K05995g		CAGL0F03641g		CAGL0I10747g					GLK1
							CAGL0K07205g		CAGL0F04631g		CAGL0J00847g					PDC
							CAGL0K09702g		CAGL0F04829g		CAGL0J01699g					PWP1
							VPH2		CAGL0F04895g		CAGL0J04048g					PWP3
							CAGL0K11858g		CAGL0F05687g		CAGL0J04268g					PWP7
							CAGL0K11880g		CAGL0F07117g		CAGL0J06204g					PYK1
							CAGL0L05258g		CAGL0F08261g		CAGL0J06380g					SCM4
							CAGL0L05478g		CAGL0F08745g		CAGL0J09680g					SIT1
							CAGL0L05742g		CAGL0G00154g		CAGL0J09900g					STR3
							SUT2		CAGL0G00858g		CAGL0J09922g					TAL1
							CAGL0L10362g		CAGL0G02057g		CAGL0K12100g					TKL1
							CAGL0M02629g		SRP40		CAGL0K12518g					YAP6
							CAGL0M04675g		CAGL0G02937g		CAGL0L00157g					YHB1
							CAGL0M08932g		ASK10		CAGL0L00583g					YPS11
							YAP3b		CAGL0G03531g		CAGL0L06160g
							CAGL0M10571g		CAGL0G03883g		CAGL0L09911g
							CAGL0M11902g		CAGL0G05269g		CAGL0M13277g
							CAGL0M11990g		CAGL0G06050g		CAGL0M13321g
							CNB1		CAGL0G06798g		COX12
							CTA1		CAGL0G09515g		COX6
							CYT1		CAGL0G09603g		CTA1
							EPA2		CAGL0H00418g		CYC1
							ERG3		CAGL0H00704g		CYT1
							ERG6		CAGL0H00957g		DIP5
							FOL3		CAGL0H02101g		ERG11
							GAS1		CAGL0H02387g		HSP31
							GCY1		CAGL0H02541g		MDH1
							GIT1		CAGL0H02563g		RIP1
							GLK1		CAGL0H02585g		RPM2
							GLR1		CAGL0H02695g		SSR1
							GPD1		CAGL0H03707g
							GPX2		CAGL0H03971g
							GRE2(A)		CAGL0H03993g
							GRE3		CAGL0H04037g
							GSH1		CAGL0H07469g
							HBN1		CAGL0H08173g
							HEM15		CAGL0H08195g
							HIS3		CAGL0H08393g
							HIS4		CAGL0H09592g
							HSP10		CAGL0H09834g
							HSP31		CAGL0H09856g
							HSP60		CAGL0H09944g
							HXK2		CAGL0H09966g
							MET13		CAGL0H10054g
							MET15		CAGL0H10076g
							MET28		CAGL0I00418g
							MET6		CAGL0I00550g
							MRP10		CAGL0I01342g
							MT-I		CAGL0I02508g
							MUP1		CAGL0I02574g
							NCP1		CAGL0I03234g
							PHO86		SUT1
							PWP1		CAGL0I05522g
							PWP3		CAGL0I05934g
							RHR2		IDH2
							RIB4		CAGL0I07249g
							RIP1		CAGL0I08305g
							RPN4		CAGL0I09086g
							SCM4		CAGL0I09724g
							SCS7		CAGL0I09790g
							SCW4		CAGL0I10747g
							SNF1		CAGL0J00451g
							SSA1		CAGL0J00473g
							SSA3		CAGL0J00715g
							STR3		CAGL0J01331g
							SUE1		CAGL0J01699g
							SUR2		CAGL0J03080g
							TAL1		CAGL0J03256g
							TPO1_1		ZAP1
							TRR1		CAGL0J06050g
							TRX2		CAGL0J06380g
							TSA1		CAGL0J09262g
							ZWF1		CAGL0J09790g
									CAGL0J11462g
									CAGL0K01133g
									CAGL0K01155g
									CAGL0K02145g
									CAGL0K03421g
									CAGL0K04125g
									RME1
									CAGL0K04301g
									CAGL0K04367g
									CAGL0K04499g
									CAGL0K04719g
									GLN1
									CAGL0K05813g
									CAGL0K07007g
									CAGL0K07183g
									CAGL0K07205g
									CAGL0K07458g
									GAT1
									CAGL0K07678g
									HAP4
									CAGL0K11297g
									CAGL0K11880g
									CAGL0K12100g
									CAGL0K12804g
									CAGL0L00583g
									CAGL0L02321g
									CAGL0L02453g
									CAGL0L03135g
									CAGL0L03157g
									GAP1
									CAGL0L03846g
									CAGL0L06248g
									CAGL0L06424g
									CAGL0L07744g
									CAGL0L07810g
									CAGL0L08008g
									CAGL0L09251g
									CAGL0L10043g
									CAGL0L11990g
									CAGL0L12892g
									CAGL0M00374g
									CAGL0M02167g
									CAGL0M03487g
									CAGL0M04675g
									CAGL0M06347g
									CAGL0M06655g
									CAGL0M06677g
									CAGL0M06963g
									CAGL0M07634g
									CAGL0M08552g
									CAGL0M10571g
									CAGL0M11000g
									CAGL0M12386g
									CAGL0M12881g
									CAGL0M13651g
									CAGL0M13893g
									CPR1
									CTA1
									DOG2
									DUR3
									EPA2
									ERG3
									FBA1
									FCY2
									GAS1
									GLK1
									GND1
									GPD1
									GPX2
									GRE3
									HHT2
									HIS4
									HPT1
									HSP31
									HXT4
									KNH1
									LYS7
									MDH1
									MET15
									MET3
									MT-IIB
									PEX11
									PFK1
									PFK2
									PFY1
									PGK1
									PHM8
									PHO84
									PIR2
									PLB1
									PMA1
									QDR2
									SCS7
									SNF2
									SOL3
									SSA1
									SSA3
									SUR2
									TAL1
									TIR3
									TKL1
									TPO3
									YAP6
									ZWF1

## Sheet: Induced TFs during infection
Supplementary file 4 - List of transcription factor induced during macrophage infection
ORF/Gene name	Sc ortholog	Characterized/verified ORF	Cg description	Sc description
CAGL0G02739g	XBP1	Uncharacterized ORF	Ortholog(s) have DNA-binding transcription factor activity	Transcriptional repressor; binds promoter sequences of cyclin genes, CYS3, and SMF2; not expressed during log phase of growth, but induced by stress or starvation during mitosis, and late in meiosis; represses 15% of all yeast genes as cells transition to quiescence; important for maintaining G1 arrest and for longevity of quiescent cells; member of Swi4p/Mbp1p family; phosphorylated by Cdc28p; r…
CAGL0L03157g	DAL80	Uncharacterized ORF	Ortholog(s) have DNA-binding transcription factor activity	Negative regulator of genes in multiple nitrogen degradation pathways; expression is regulated by nitrogen levels and by Gln3p; member of the GATA-binding family, forms homodimers and heterodimers with Gzf3p; DAL80 has a paralog, GZF3, that arose from the whole genome duplication
CAGL0J04400g	HAP3	Uncharacterized ORF	Ortholog(s) have DNA-binding transcription activator activity	Subunit of the Hap2p/3p/4p/5p CCAAT-binding complex; complex is heme-activated and glucose-repressed; complex is a transcriptional activator and global regulator of respiratory gene expression; contains sequences contributing to both complex assembly and DNA binding
CAGL0F00561g	RPA12	Uncharacterized ORF	Ortholog(s) have RNA polymerase I activity	RNA polymerase I subunit A12.2; contains two zinc binding domains, and the N terminal domain is responsible for anchoring to the RNA pol I complex; physically interacts with transcriptional activator Msn4p, to regulate transcription of AYR1, a gene involved in lipid metabolism
CAGL0K06413g	STP1	Uncharacterized ORF	Ortholog(s) have DNA-binding transcription activator activity	Transcription factor; contains a N-terminal regulatory motif (RI) that acts as a cytoplasmic retention determinant and as an Asi dependent degron in the nucleus; undergoes proteolytic processing by SPS (Ssy1p-Ptr3p-Ssy5p)-sensor component Ssy5p in response to extracellular amino acids; activates transcription of amino acid permease genes and may have a role in tRNA processing; STP1 has a paralog,…
CAGL0E00737g	HMO1	Uncharacterized ORF	Ortholog(s) have DNA binding	Chromatin associated high mobility group (HMG) family member; involved in compacting, bending, bridging and looping DNA; rDNA-binding component that regulates transcription from RNA polymerase I promoters; regulates start site selection of ribosomal protein genes via RNA polymerase II promoters; role in genome maintenance; associates with a 5'-3' DNA helicase and Fpr1p, a prolyl isomerase; reloca…
MET28		Uncharacterized ORF	bZIP domain-containing protein	bZIP transcriptional activator in the Cbf1p-Met4p-Met28p complex; participates in the regulation of sulfur metabolism
CAGL0J03608g	HCM1	Uncharacterized ORF	Ortholog(s) have DNA-binding transcription factor activity and role in cellular response to oxidative stress	Forkhead transcription factor; drives S-phase activation of genes involved in chromosome segregation, spindle dynamics, budding; also activates genes involved in respiration, use of alternative energy sources, NAD synthesis, oxidative stress resistance; regulated by cell wall integrity checkpoint; key factor in early adaptation to nutrient deficiency and diauxic shift; suppressor of calmodulin mu…
RTG1		Uncharacterized ORF	Ortholog(s) have DNA-binding transcription factor activity	Transcription factor (bHLH) involved in interorganelle communication; contributes to communication between mitochondria, peroxisomes, and nucleus; target of Hog1p; activated in stochastic pulses of nuclear localization
CAGL0J01177g	ABF1	Verified ORF	Essential protein involved in subtelomeric silencing and cell cycle progression	DNA binding protein with possible chromatin-reorganizing activity; involved in transcriptional activation, gene silencing, and DNA replication and repair
CAGL0K04543g	SPT4	Uncharacterized ORF	Ortholog(s) have RNA polymerase II complex binding	Spt4p/5p (DSIF) transcription elongation factor complex subunit; the Spt4/5 complex binds to ssRNA in a sequence-specific manner, and along with RNAP I and II has multiple roles regulating transcriptional elongation, RNA processing, quality control, and transcription-coupled repair; localizes to kinetochores and heterochromatin, influencing chromosomal dynamics and silencing; required for transcr…
HAP4		Verified ORF	Component of CCAAT-binding factor complex that functions as transcription factor	Transcription factor; subunit of the heme-activated, glucose-repressed Hap2p/3p/4p/5p CCAAT-binding complex, a transcriptional activator and global regulator of respiratory gene expression; provides the principal activation function of the complex; involved in diauxic shift
CAGL0G07249g	YHP1	Uncharacterized ORF	Ortholog(s) have RNA polymerase II transcription regulatory region sequence-specific DNA binding activity	Homeobox transcriptional repressor; binds to Mcm1p and to early cell cycle boxes (ECBs) in the promoters of cell cycle-regulated genes expressed in M/G1 phase; expression is cell cycle-regulated; phosphorylated by Cdc28p; relocalizes from nucleus to cytoplasm upon DNA replication stress; YOX1 has a paralog, YHP1, that arose from the whole genome duplication
CAGL0L07480g	NRG2	Uncharacterized ORF	Ortholog(s) have sequence-specific DNA binding activity	Transcriptional repressor; recruits the Cyc8p-Tup1p complex to promoters; mediates glucose repression and negatively regulates a variety of processes including filamentous growth and alkaline pH response; activated in stochastic pulses of nuclear localization in response to low glucose
MIG1		Verified ORF	Transcriptional regulatory protein	Transcription factor involved in glucose repression; sequence specific DNA binding protein containing two Cys2His2 zinc finger motifs; regulated by the SNF1 kinase and the GLC7 phosphatase; regulates filamentous growth along with Mig2p in response to glucose depletion; activated in stochastic pulses of nuclear localization, shuttling between cytosol and nucleus depending on external glucose level…
CAGL0G08646g	POG1	Uncharacterized ORF	Ortholog(s) have RNA polymerase II cis-regulatory region sequence-specific DNA binding activity and role in positive regulation of transcription by RNA polymerase II	DNA-binding transcriptional activator; involved in cell cycle regulation; overexpression promotes recovery from pheromone induced arrest via CLN1/2 transcription, induction of of IME1 during sporulation, and suppression of stress sensitivity resulting from mutation of the E3 ubiquitin ligase Rsp5p; binds upstream of BAR1 and cell cycle-related genes; phosphorylated form may be ubiquitinated by Dm…
CAGL0K02145g	COM2	Uncharacterized ORF	Ortholog(s) have role in cellular response to sulfur dioxide	Transcription factor that binds IME1 Upstream Activation Signal (UAS)ru; COM2 transcription is regulated by Haa1p, Sok2p and Zap1p transcriptional activators; may bind the IME1 promoter under all growth conditions to negatively regulate its transcription in the absence of a positive regulator that binds more effectively; repressor activity may depend on phosphorylation by PKA; C. albicans homolog…
RME1		Uncharacterized ORF	Ortholog(s) have DNA-binding transcription factor activity	Zinc finger protein involved in control of meiosis; prevents meiosis by repressing IME1 expression and promotes mitosis by activating CLN2 expression; directly repressed by a1-alpha2 regulator; mediates cell type control of sporulation; relocalizes from nucleus to cytoplasm upon DNA replication stress
CAGL0M07634g	SOK2	Verified ORF	Transcription factor involved in control of biofilm formation	Nuclear protein that negatively regulates pseudohyphal differentiation; plays a regulatory role in the cyclic AMP (cAMP)-dependent protein kinase (PKA) signal transduction pathway; relocalizes to the cytosol in response to hypoxia; SOK2 has a paralog, PHD1, that arose from the whole genome duplication
CAGL0M01716g	TEC1	Verified ORF	Transcription factor involved in control of biofilm formation	Transcription factor targeting filamentation genes and Ty1 expression; Ste12p activation of most filamentation gene promoters depends on Tec1p and Tec1p transcriptional activity is dependent on its association with Ste12p; binds to TCS elements upstream of filamentation genes, which are regulated by Tec1p/Ste12p/Dig1p complex; competes with Dig2p for binding to Ste12p/Dig1p; positive regulator of…
CAGL0F07909g	TBS1	Uncharacterized ORF	Has domain(s) with predicted DNA binding	Protein of unknown function; the authentic, non-tagged protein is detected in highly purified mitochondria in high-throughput studies; associates with rDNA chromatin in vivo; TBS1 has a paralog, HAL9, that arose from the whole genome duplication
UPC2B		Uncharacterized ORF	Putative Zn(2)-Cys(6) binuclear cluster transcriptional regulator of ergosterol biosynthesis	Sterol regulatory element binding protein; induces sterol biosynthetic genes, upon sterol depletion; acts as a sterol sensor, binding ergosterol in sterol rich conditions; relocates from intracellular membranes to perinuclear foci upon sterol depletion; redundant activator of filamentation with ECM22, up-regulating the expression of filamentous growth genes; contains a Zn[2]-Cys[6] binuclear clus…
ZAP1		Uncharacterized ORF	Ortholog(s) have DNA-binding transcription factor activity	Zinc-regulated transcription factor; binds to zinc-responsive promoters to induce transcription of certain genes in presence of zinc, represses other genes in low zinc; regulates its own transcription; contains seven zinc-finger domains
CAGL0C02519g	MIG3	Uncharacterized ORF	Ortholog(s) have DNA-binding transcription repressor activity	Transcriptional regulator; partially nonfunctional in S288C strains but has a major role in catabolite repression and ethanol response in some other strains; involved in response to toxic agents; phosphorylation by Snf1p or the Mec1p pathway inactivates Mig3p, allowing induction of damage response genes
HAP5		Verified ORF	Component of CCAAT-binding factor complex that functions as transcription factor	Subunit of the Hap2p/3p/4p/5p CCAAT-binding complex; complex is heme-activated and glucose repressed; complex is a transcriptional activator and global regulator of respiratory gene expression; required for assembly and DNA binding activity of the complex
CAGL0E04312g	STP2	Uncharacterized ORF	Ortholog(s) have DNA-binding transcription activator activity	Transcription factor; contains a N-terminal regulatory motif (RI) that acts as a cytoplasmic retention determinant and as an Asi dependent degron in the nucleus; undergoes proteolytic processing by SPS (Ssy1p-Ptr3p-Ssy5p)-sensor component Ssy5p in response to extracellular amino acids; activates transcription of amino acid permease genes and may have a role in tRNA processing; STP1 has a paralog,…
CAGL0B03421g	HAP1	Verified ORF	DNA-binding transcription activator involved in resistance to azoles	Zinc finger transcription factor; involved in the complex regulation of gene expression in response to levels of heme and oxygen; localizes to the mitochondrion as well as to the nucleus; the S288C sequence differs from other strain backgrounds due to a Ty1 insertion in the carboxy terminus
HAA1		Uncharacterized ORF	Putative transcription factor	Transcriptional activator involved in adaptation to weak acid stress; activates transcription of TPO2, YRO2, and other genes encoding membrane stress proteins; HAA1 has a paralog, CUP2, that arose from the whole genome duplication; relocalizes from cytoplasm to nucleus upon DNA replication stress
GAT1		Uncharacterized ORF	Ortholog(s) have DNA-binding transcription activator activity	Transcriptional activator of nitrogen catabolite repression genes; contains a GATA-1-type zinc finger DNA-binding motif; activity and localization regulated by nitrogen limitation and Ure2p; different translational starts produce two major and two minor isoforms that are differentially regulated and localized
YAP6		Uncharacterized ORF	bZIP domain-containing protein	Basic leucine zipper (bZIP) transcription factor; physically interacts with the Tup1-Cyc8 complex and recruits Tup1p to its targets; overexpression increases sodium and lithium tolerance; computational analysis suggests a role in regulation of expression of genes involved in carbohydrate metabolism; YAP6 has a paralog, CIN5, that arose from the whole genome duplication
GLM6		Uncharacterized ORF	Gene used for molecular typing of <i>C. glabrata</i> strain isolates	N/A
AFT1		Verified ORF	Putative RNA polymerase II transcription factor	Transcription factor involved in iron utilization and homeostasis; binds consensus site PyPuCACCCPu and activates transcription in response to changes in iron availability; in iron-replete conditions localization is regulated by Grx3p, Grx4p, and Fra2p, and promoter binding is negatively regulated via Grx3p-Grx4p binding; AFT1 has a paralog, AFT2, that arose from the whole genome duplication; rel…
YAP3		Uncharacterized ORF	bZIP domain-containing protein	Basic leucine zipper (bZIP) transcription factor
CAGL0E03762g	RIM101	Uncharacterized ORF	Ortholog(s) have DNA-binding transcription repressor activity	Cys2His2 zinc-finger transcriptional repressor; involved in alkaline responsive gene repression as part of adaptation to alkaline conditions; involved in cell wall assembly; required for alkaline pH-stimulated haploid invasive growth and sporulation; activated by alkaline-dependent proteolytic processing which results in removal of the C-terminal tail; similar to A. nidulans PacC
AP5	YAP5	Verified ORF	bZIP domain-containing protein	Basic leucine zipper (bZIP) iron-sensing transcription factor; senses high-iron conditions via two Fe/S clusters bound to its activator domain; involved in diauxic shift; YAP5 has a paralog, YAP7, that arose from the whole genome duplication
GCN4		Uncharacterized ORF	bZIP domain-containing protein	bZIP transcriptional activator of amino acid biosynthetic genes; activator responds to amino acid starvation; expression is tightly regulated at both the transcriptional and translational levels; contains four upstream open reading frames (uORFs) in 5' untranslated region which regulate translation
CAGL0E05566g	TYE7	Uncharacterized ORF	Ortholog(s) have DNA-binding transcription factor activity and role in positive regulation of glycolytic process	Serine-rich protein that contains a bHLH DNA binding motif; binds E-boxes of glycolytic genes and contributes to their activation; may function as a transcriptional activator in Ty1-mediated gene expression; bHLH stands for basic-helix-loop-helix
RPN4		Verified ORF	Tanscription factor for proteasome genes	Transcription factor that stimulates expression of proteasome genes; Rpn4p levels are in turn regulated by the 26S proteasome in a negative feedback control mechanism; RPN4 is transcriptionally regulated by various stress responses; relative distribution to the nucleus increases upon DNA replication stress
CAGL0C01551g	TOS8	Uncharacterized ORF	Ortholog(s) have RNA polymerase II cis-regulatory region sequence-specific DNA binding activity and role in negative regulation of transcription by RNA polymerase II	Homeodomain-containing protein and putative transcription factor; found associated with chromatin; target of SBF transcription factor; induced during meiosis and under cell-damaging conditions; TOS8 has a paralog, CUP9, that arose from the whole genome duplication
