# Supplementary material for: Temporal transcriptional response of Candida glabrata during macrophage infection reveals a multifaceted transcriptional regulator CgXbp1 important for macrophage response and fluconazole resistance
Source: eLife. 2024 Oct 2;13:e73832. doi: 10.7554/eLife.73832 (PMC11554308; doi:10.7554/eLife.73832)
Supplement: Supplementary file 5. [file elife-73832-supp5.xlsx]

## Sheet: Supplemntary File 5
	Supplementary File 5: List of orthologues for the macrophage infection-induced TF and non-TF genes of C. glabrata previously shown to have regulatory association with Xbp1 or Hap3 in S. cerevisiae obtained from the PathoYeastract database
	Transcription Factor	% of input genes	Target ORF (Sc orthologue)			Transcription Factor	% of input genes	Target ORF (Sc orthologue)
	CAGL0G02739g (XBP1)	0.359	CAGL0C02519g (MIG3)			CAGL0G02739g (XBP1)	0.3479	CAGL0K12254g (VID24)
			CAGL0K02145g (COM2)					CAGL0M05599g (TOS1)
			GAT1 (GAT1)					CAGL0M06347g (YPC1)
			AFT1 (AFT1)					CAGL0K06655g (NGR1)
			MIG1 (MIG1)					CAGL0K06699g (SDS24)
			RME1 (RME1)					CAGL0C01793g (OM14)
			CAGL0K04543g (SPT4)					GPX2 (GPX2)
			CAGL0G02739g (XBP1)					CAGL0L02079g (CTP1)
			CAGL0J01177g (ABF1)					CAGL0B00396g (MIC10)
			RTG1 (RTG1)					CAGL0B00792g (SRO9)
			YAP6 (CIN5)					HIS4 (HIS4)
			GLM6 (YPR015C)					HBN1 (HBN1)
			CAGL0J04400g (HAP3)					CAGL0K05753g (AGP1)
			CAGL0L07480g (NRG2)					CAGL0G06754g (CDC10)
								CAGL0M03465g (ADY2)
								PGK1 (PGK1)
								ABP1 (ABP1)
								SSB2 (SSB1)
								CAGL0J09790g (GGC1)
								CAGL0J09086g (RPL35A)
								CAGL0J06380g (INH1)
								CAGL0J09262g (INH1)
								CAGL0I03366g (FAP7)
								PPH21 (PPH21)
								CAGL0J09328g (PCL2)
								CAGL0H10362g (TMA17)
								CAGL0I00814g (RPP1A)
								PSA1 (PSA1)
								VIG9 (PSA1)
								CAGL0C04433g (MCD1)
								CAGL0H10076g (MRH1)
								CAGL0K11880g (MRH1)
								ENA1 (ENA5)
								CAGL0H08393g (BAP3)
								CAGL0L07546g (BAP3)
								TPI1 (TPI1)
								PST1 (PST1)
								CAGL0G05269g (FMP16)
								CAGL0G05329g (SNF11)
								BMH1(A) (BMH2)
								BMH1(B) (BMH2)
								CAGL0E01287g (KGD2)
								CAGL0E00803g (HSP42)
								CAGL0F05863g (SDH4)
								CAGL0E04774g (YDR222W)
								CAGL0C04389g (HTB1)
								CAGL0K11462g (HTB1)
								CTA1 (CTA1)
								CAGL0M08624g (MSW1)
								SUR2 (SUR2)
								CAGL0H01397g (ATP5)
								CPR5 (CPR5)
								HXT4 (HXT7)
								HXT4/6/7 (HXT7)
								HXT6/7 (HXT7)
								HXT3 (HXT3)
								CAGL0A02409g (PAL1)
								TRR1 (TRR1)
								CAGL0A03036g (ATP17)
								CAGL0A03212g (ATO3)
								HPT1 (HPT1)
								CAGL0F03003g (HKR1)
								CAGL0G07271g (TSA2)
								TSA1 (TSA2)
								CAGL0M08932g (YDR476C)
								GLK1 (EMI2)
								HSP31 (HSP31)
								UTR2 (UTR2)
								CAGL0L08008g (PMP2)
								TIR2 (TIR1)
								CAGL0C02519g (MIG3)
								SAH1 (SAH1)
								CAGL0J02684g (ERG28)
								CAGL0J02794g (ISD11)
								FCY2 (FCY2)
								FCY21 (FCY2)
								CAGL0M11660g (GPP2)
								RHR2 (GPP2)
								CAGL0J03058g (ICL1)
								CAGL0J03146g (RNR1)
								ALD5 (ALD5)
								CAGL0I05098g (SBH1)
								MET6 (MET6)
								CAGL0K02277g (DSE1)
								CAGL0K02145g (COM2)
								CAGL0I06831g (COX15)
								FTR1 (FTR1)
								CAGL0I06721g (LSM5)
								CAGL0L11902g (ADK2)
								CAGL0K12518g (AGX1)
								GAT1 (GAT1)
								HSP12 (HSP12)
								CAGL0D05280g (MET10)
								CAGL0D05214g (RPL29)
								CAGL0A04829g (HXK1)
								HXK2 (HXK1)
								CAGL0H07667g (PDE1)
								CAGL0H07887g (ADE5,7)
								CAGL0A03740g (POX1)
								ARO8 (ARO8)
								CAGL0L06160g (COX4)
								CAGL0F07117g (GPG1)
								AFT1 (AFT1)
								CAGL0I00418g (OLE1)
								GRE2(A) (YGL039W)
								MIG1 (MIG1)
								CAGL0A01474g (SCW11)
								CAGL0E02915g (SCW11)
								ERG4 (ERG4)
								PMA1 (PMA1)
								CAGL0A01023g (NMA2)
								CAGL0F08833g (MSB2)
								CAGL0K04103g (CAX4)
								RME1 (RME1)
								CAGL0K04301g (FMP48)
								CAGL0K04477g (ERG25)
								CAGL0K04543g (SPT4)
								CAGL0K01155g (YGR079W)
								PDC (PDC6)
								ASK10 (ASK10)
								CAGL0I10747g (MEP1)
								CAGL0F04829g (LSB1)
								TPO3 (TPO2)
								CAGL0E03113g (RSR1)
								ERG1 (ERG1)
								CAGL0G04213g (RNR4)
								CRH1 (CRH1)
								CAGL0L06534g (SMI1)
								YHB1 (YHB1)
								ENO1 (ENO1)
								MP65 (SCW4)
								SCW4 (SCW4)
								CAGL0G00220g (BGL2)
								CAGL0K08844g (AIM17)
								CAGL0K03201g (MCO14)
								CAGL0K02893g (QCR10)
								ERG11 (ERG11)
								NCP1 (NCP1)
								DOG2 (DOG1)
								CAGL0J00385g (FSH1)
								COX6 (COX6)
								CAGL0J10846g (PCL5)
								CAGL0H02101g (RTC3)
								GRE3 (GRE3)
								CAGL0G06138g (YCK1)
								CAGL0G06006g (YHR138C)
								CAGL0I02178g (MPC2)
								SOL3 (SOL3)
								CAGL0I02574g (OYE2)
								CAGL0K10780g (IMD2)
								CAGL0H06787g (POT1)
								CAGL0H06523g (PAN6)
								CAGL0L08294g (AXL2)
								CAGL0F04807g (OM45)
								CAGL0G08712g (KGD1)
								CAGL0G08668g (SIM1)
								CAGL0J09922g (SIM1)
								QDR2 (QDR2)
								CAGL0C01325g (COX5A)
								CAGL0G02739g (XBP1)
								LYS12 (LYS12)
								CAGL0M06633g (AIM19)
								CAGL0J03080g (RGI2)
								AUS1 (PDR11)
								TIR3 (TIR3)
								CAGL0F06875g (LYS1)
								PHO87 (PHO90)
								CAGL0L08110g (RPL39)
								CAGL0I06270g (QCR8)
								PIR2 (HSP150)
								PIR4 (CIS3)
								INO1 (INO1)
								CAGL0L05742g (MRS3)
								CAGL0L03289g (NCA3)
								SUN4 (NCA3)
								CAGL0G04433g (PRM10)
								CAGL0D03432g (RNR2)
								CAGL0B03817g (MHO1)
								TDH3 (TDH2)
								CAGL0I01430g (ANB1)
								CYC1 (CYC1)
								CAGL0F00231g (MIR1)
								CAGL0M09020g (SFC1)
								CAGL0C04785g (YJR115W)
								CAGL0H00572g (TDA4)
								ATP2 (ATP2)
								BAT1 (BAT2)
								AWP6 (DAN4)
								CAGL0H09130g (MNN4)
								PIR1 (PIR1)
								GPM1 (GPM1)
								CAGL0J00847g (SDH1)
								CAGL0D01958g (SDH3)
								CAGL0D01980g (TGL1)
								CAGL0D02134g (RCI50)
								PMU1 (PMU1)
								CAGL0J01177g (ABF1)
								CWP1.1 (CWP1)
								CWP1.2 (CWP1)
								CAGL0L05258g (SRX1)
								MDH1 (MDH1)
								CAGL0L05170g (RRP14)
								FBA1 (FBA1)
								UGP1 (UGP1)
								CAGL0L02321g (MET14)
								CAGL0L02211g (MEH1)
								CAGL0L02167g (FOX2)
								CAGL0G07667g (PRY2)
								GAP1 (GAP1)
								CAGL0M05951g (FMP46)
								CAGL0L10362g (YKR075C)
								CAGL0H06633g (PCK1)
								CAGL0D05082g (UBI4)
								CAGL0G03883g (HSP104)
								SSA1 (SSA2)
								CAGL0D06556g (DPS1)
								CAGL0D05566g (YEH1)
								CAGL0D03322g (IZH3)
								SNF7 (SNF7)
								CAGL0D01892g (AAT2)
								CAGL0F01969g (MLO50)
								ERG3 (ERG3)
								CAGL0F01749g (SHM2)
								CAGL0M11572g (LCL2)
								YPS1 (YPS1)
								CAGL0B02717g (ACS2)
								CAGL0B04917g (IDP2)
								SAM1 (SAM1)
								CAGL0A04169g (MMR1)
								CAGL0A04081g (NCW2)
								HSP60 (HSP60)
								CTS1 (CTS1)
								CAGL0I00572g (ATP14)
								CAGL0G09515g (EXG1)
								CAGL0I00484g (EXG1)
								ACO1 (ACO1)
								CAGL0E03564g (CDC3)
								CAGL0G00858g (MID2)
								TAL1 (TAL1)
								CAGL0H04939g (FBP1)
								SSR1 (CCW14)
								CAGL0C02623g (COX8)
								CAGL0M00902g (DIF1)
								CAR2 (CAR2)
								CAGL0B02497g (TUB3)
								CAGL0L11132g (SML1)
								CAGL0L01551g (SUR7)
								CAGL0J11836g (CAT2)
								ERG6 (ERG6)
								CAGL0D02640g (HXT2)
								CAGL0D02662g (HXT2)
								ERG5 (ERG5)
								FET3 (FET3)
								SEC14 (SEC14)
								ADH1 (ADH3)
								CAGL0J01441g (ADH3)
								CAGL0K03421g (PGM2)
								CAGL0A03366g (ADE16)
								CAGL0K03663g (NCW1)
								CAGL0K03685g (PKR1)
								CAGL0I00748g (NDE1)
								CAGL0H08844g (DDR48)
								CAGL0E06072g (YMR181C)
								CAGL0K10912g (MRPL24)
								CAGL0L10648g (CLN1)
								CAGL0K07436g (YHM2)
								CAGL0K07392g (ZRC1)
								CAGL0H02541g (MLO1)
								CAGL0H02491g (COX7)
								CAGL0M13629g (YMR295C)
								CAGL0M13651g (PRC1)
								GAS1 (GAS1)
								GAS2 (GAS1)
								FET4 (FET4)
								EGT2 (EGT2)
								CAGL0E02013g (RPL18B)
								CAGL0M03773g (TOS6)
								CAGL0E02233g (PCL1)
								CAGL0J08272g (GOR1)
								CAGL0K05027g (ADE12)
								CAGL0K04785g (MRX7)
								CAGL0J06204g (FMP41)
								CAGL0J06050g (YGP1)
								CAGL0K09702g (YNL134C)
								CAGL0L03982g (MLS1)
								CAGL0G06732g (LEU4)
								AQR1 (AQR1)
								CAGL0J10076g (YNL058C)
								CAGL0G01320g (MSG5)
								IDH1 (IDH1)
								NCE103 (NCE103)
								CAGL0H09856g (HHT2)
								CAGL0M06655g (HHT2)
								HHT2 (HHT2)
								CAGL0C04136g (HHF2)
								CAGL0H09834g (HHF2)
								CAGL0M06677g (HHF2)
								TEF3 (HEF3)
								CAGL0H03839g (PET8)
								CAGL0H03993g (CIT1)
								CAGL0L10780g (ACC1)
								CAGL0M11000g (EGO4)
								LYS9 (LYS9)
								CAGL0L09911g (HPF1)
								PEX11 (PEX11)
								RBX1 (HRT1)
								RTG1 (RTG1)
								ARG1 (ARG1)
								CAGL0F01089g (SIL1)
								CAGL0G08954g (YOL019W)
								CAGL0E02409g (CSI2)
								YAP6 (CIN5)
								CAGL0L10043g (MTH1)
								CAGL0B04543g (CRC1)
								GCY1 (GCY1)
								IDH2 (IDH2)
								CAGL0H04037g (GAC1)
								CAGL0I10967g (BFR1)
								CAGL0J04048g (ISU2)
								CAGL0J04004g (MCP1)
								CAGL0J03960g (WTM2)
								CAGL0K08910g (RPT4)
								CAGL0I09592g (CPA1)
								CAGL0I09856g (SFG1)
								CAGL0E05456g (YOR338W)
								CAGL0E05632g (PUT4)
								CAGL0G03729g (NDD1)
								CAGL0A01089g (PBI1)
								DIP5 (DIP5)
								CAGL0A01045g (FUM1)
								CAGL0E05654g (PGC1)
								CAGL0G09064g (YIG1)
								CAGL0M02167g (PRM4)
								GLR1 (GLR1)
								CAGL0H05489g (ATP4)
								CAGL0M07337g (LGE1)
								DIG1 (DIG1)
								CAGL0J01848g (RPA135)
								GLM6 (YPR015C)
								CAGL0K05137g (ATH1)
								CAGL0K05203g (YOP1)
								CAGL0K05423g (TIP41)
								TKL1 (TKL1)
								CAGL0G01881g (MRPL51)
								CAGL0D04708g (CTR1)
								ASN2 (ASN2)
								SUE1 (SUE1)
								CAGL0F04895g (GPH1)
								CAGL0G09955g (DPM1)
								CAGL0D00176g (GDH1)
								CAGL0M12320g (FLC2)
								CAGL0M11990g (CLN3)
								CAGL0G06358g (SNC1)
								CYS3 (CYS3)
								CAGL0I04444g (ADE1)
								CAGL0C05027g (YAT1)
								ATP1 (ATP1)
								CAGL0F04477g (PRE7)
								CAGL0F04213g (PET9)
								CAGL0F04125g (YBL029W)
								CAGL0J04400g (HAP3)
								CAGL0J04268g (ACH1)
								CAGL0C04411g (HTA2)
								CAGL0K11440g (HTA2)
								CAGL0B04345g (OLA1)
								CAGL0I04686g (ATP3)
								CAGL0H09944g (ZTA1)
								CAGL0H09966g (FMP23)
								CAGL0L07480g (NRG2)
								CAGL0L07502g (TIP1)
								ECM33 (ECM33)
								CAGL0J05258g (MRPL8)
								CAGL0J05082g (IKS1)
								CAGL0E03366g (DPA10)
								CAGL0J02904g (GIP2)
								GPX2 (GPX2)
						CAGL0J04400g (HAP3)	0.0668	CAGL0K05753g (AGP1)
								LEU2 (LEU2)
								CAGL0J09680g (HEM3)
								CAGL0J06380g (INH1)
								CAGL0J09262g (INH1)
								CAGL0D00748g (COX9)
								CAGL0E01287g (KGD2)
								MNN10 (MNN10)
								CAGL0L10043g (MTH1)
								CAGL0H01397g (ATP5)
								CAGL0A03036g (ATP17)
								CAGL0G07271g (TSA2)
								TSA1 (TSA2)
								CAGL0G10153g (QCR7)
								RIP1 (RIP1)
								CAGL0J02794g (ISD11)
								PHM4 (VTC1)
								GRX4 (GRX4)
								HSP12 (HSP12)
								CAGL0L06204g (COX13)
								CAGL0L06160g (COX4)
								ASN2 (ASN2)
								CAGL0H09328g (QCR9)
								YHB1 (YHB1)
								CAGL0F08503g (FOL2)
								CAGL0K02893g (QCR10)
								CAGL0E04356g (SOD2)
								DOG2 (DOG1)
								COX6 (COX6)
								CAGL0G06138g (YCK1)
								CAGL0I02574g (OYE2)
								CAGL0H06699g (GUT2)
								CAGL0G08712g (KGD1)
								CYC1 (CYC1)
								CAGL0F00231g (MIR1)
								ATP2 (ATP2)
								BAT1 (BAT2)
								CAGL0C03333g (FRE2)
								CAGL0J00847g (SDH1)
								CAGL0D01958g (SDH3)
								CAGL0K11616g (OAC1)
								ATP7 (ATP7)
								CAGL0L02321g (MET14)
								CAGL0C03223g (SDH2)
								CAGL0D05082g (UBI4)
								TPO1_1 (TPO1)
								CAGL0G03905g (ISA1)
								CAGL0G03883g (HSP104)
								CAGL0A03366g (ADE16)
								COX12 (COX12)
								CAGL0G08195g (UPS2)
								CAGL0I00572g (ATP14)
								CAGL0C02623g (COX8)
								CAGL0B02431g (NDI1)
								RPM2 (RPM2)
								FET3 (FET3)
								CAGL0I00748g (NDE1)
								CAGL0H02491g (COX7)
								CAGL0E02233g (PCL1)
								CAGL0C01325g (COX5A)
								CAGL0H03993g (CIT1)
								CYT1 (CYT1)
								CAGL0G09691g (SER1)
								CAGL0K08954g (CDC31)
								CAGL0D00176g (GDH1)
								CAGL0A01111g (ATP15)
								ATP1 (ATP1)
								CAGL0F04213g (PET9)
								CAGL0C04367g (ECM15)
								CAGL0B04345g (OLA1)
								CAGL0I04686g (ATP3
