# Supplementary material for: Temporal transcriptional response of Candida glabrata during macrophage infection reveals a multifaceted transcriptional regulator CgXbp1 important for macrophage response and fluconazole resistance
Source: eLife. 2024 Oct 2;13:e73832. doi: 10.7554/eLife.73832 (PMC11554308; doi:10.7554/eLife.73832)
Supplement: Supplementary file 6. [file elife-73832-supp6.xlsx]

## Sheet: Supplementary File 6
Supplementary File 6 - CgXbp1MYC binding sites upon macrophage infection identified in biological replicates by MACS2 (Model-based Analyses for ChIP-seq) peak calling
Peaks located at gene body	chr	start	end	abs_summit		Peaks located at promoter	chr	start	end	abs_summit
Peak1	ChrA_C_glabrata_CBS138	57463	57663	57563		Peak35	ChrA_C_glabrata_CBS138	130041	130241	130141
Peak2	ChrA_C_glabrata_CBS138	230855	231055	230955		Peak36	ChrA_C_glabrata_CBS138	160382	160582	160482
Peak3	ChrC_C_glabrata_CBS138	81365	81565	81465		Peak37	ChrA_C_glabrata_CBS138	186433	186633	186533
Peak4	ChrC_C_glabrata_CBS138	171207	171407	171307		Peak38	ChrA_C_glabrata_CBS138	194065	194265	194165
Peak5	ChrC_C_glabrata_CBS138	443763	443963	443863		Peak39	ChrA_C_glabrata_CBS138	368397	368597	368497
Peak6	ChrD_C_glabrata_CBS138	521571	521771	521671		Peak40	ChrA_C_glabrata_CBS138	488581	488781	488681
Peak7	ChrE_C_glabrata_CBS138	17055	17255	17155		Peak41	ChrB_C_glabrata_CBS138	90009	90209	90109
Peak8	ChrE_C_glabrata_CBS138	162515	162715	162615		Peak42	ChrB_C_glabrata_CBS138	410330	410530	410430
Peak9	ChrE_C_glabrata_CBS138	168860	169060	168960		Peak43	ChrB_C_glabrata_CBS138	472396	472596	472496
Peak10	ChrE_C_glabrata_CBS138	171248	171448	171348		Peak44	ChrC_C_glabrata_CBS138	102651	102851	102751
Peak11	ChrF_C_glabrata_CBS138	738683	738883	738783		Peak45	ChrC_C_glabrata_CBS138	108733	108933	108833
Peak12	ChrF_C_glabrata_CBS138	885566	885766	885666		Peak46	ChrC_C_glabrata_CBS138	281771	281971	281871
Peak13	ChrG_C_glabrata_CBS138	377818	378018	377918		Peak47	ChrD_C_glabrata_CBS138	20070	20270	20170
Peak14	ChrG_C_glabrata_CBS138	896626	896826	896726		Peak48	ChrD_C_glabrata_CBS138	21905	22105	22005
Peak15	ChrG_C_glabrata_CBS138	990010	990210	990110		Peak49	ChrD_C_glabrata_CBS138	141057	141257	141157
Peak16	ChrH_C_glabrata_CBS138	406253	406453	406353		Peak50	ChrD_C_glabrata_CBS138	400391	400591	400491
Peak17	ChrI_C_glabrata_CBS138	220975	221175	221075		Peak51	ChrD_C_glabrata_CBS138	457504	457704	457604
Peak18	ChrI_C_glabrata_CBS138	221659	221859	221759		Peak52	ChrD_C_glabrata_CBS138	515338	515538	515438
Peak19	ChrI_C_glabrata_CBS138	653772	653972	653872		Peak53	ChrD_C_glabrata_CBS138	521075	521275	521175
Peak20	ChrI_C_glabrata_CBS138	705132	705332	705232		Peak54	ChrD_C_glabrata_CBS138	530827	531027	530927
Peak21	ChrI_C_glabrata_CBS138	706988	707188	707088		Peak55	ChrE_C_glabrata_CBS138	127089	127289	127189
Peak22	ChrI_C_glabrata_CBS138	756591	756791	756691		Peak56	ChrE_C_glabrata_CBS138	146829	147029	146929
Peak23	ChrI_C_glabrata_CBS138	997367	997567	997467		Peak57	ChrE_C_glabrata_CBS138	185475	185675	185575
Peak24	ChrJ_C_glabrata_CBS138	90244	90444	90344		Peak58	ChrE_C_glabrata_CBS138	187617	187817	187717
Peak25	ChrJ_C_glabrata_CBS138	90893	91093	90993		Peak59	ChrE_C_glabrata_CBS138	346312	346512	346412
Peak26	ChrJ_C_glabrata_CBS138	292861	293061	292961		Peak60	ChrE_C_glabrata_CBS138	353025	353225	353125
Peak27	ChrJ_C_glabrata_CBS138	293704	293904	293804		Peak61	ChrE_C_glabrata_CBS138	369214	369414	369314
Peak28	ChrJ_C_glabrata_CBS138	393572	393772	393672		Peak62	ChrE_C_glabrata_CBS138	392006	392206	392106
Peak29	ChrK_C_glabrata_CBS138	530935	531135	531035		Peak63	ChrE_C_glabrata_CBS138	410619	410819	410719
Peak30	ChrK_C_glabrata_CBS138	781104	781304	781204		Peak64	ChrE_C_glabrata_CBS138	436305	436505	436405
Peak31	ChrL_C_glabrata_CBS138	1086006	1086206	1086106		Peak65	ChrE_C_glabrata_CBS138	474817	475017	474917
Peak32	ChrL_C_glabrata_CBS138	1437436	1437636	1437536		Peak66	ChrE_C_glabrata_CBS138	567016	567216	567116
Peak33	ChrM_C_glabrata_CBS138	790789	790989	790889		Peak67	ChrE_C_glabrata_CBS138	608648	608848	608748
Peak34	ChrM_C_glabrata_CBS138	848282	848482	848382		Peak68	ChrE_C_glabrata_CBS138	609358	609558	609458
						Peak69	ChrE_C_glabrata_CBS138	631895	632095	631995
						Peak70	ChrF_C_glabrata_CBS138	39416	39616	39516
						Peak71	ChrF_C_glabrata_CBS138	70837	71037	70937
						Peak72	ChrF_C_glabrata_CBS138	130495	130695	130595
						Peak73	ChrF_C_glabrata_CBS138	401546	401746	401646
						Peak74	ChrF_C_glabrata_CBS138	455418	455618	455518
						Peak75	ChrF_C_glabrata_CBS138	456898	457098	456998
						Peak76	ChrF_C_glabrata_CBS138	518643	518843	518743
						Peak77	ChrF_C_glabrata_CBS138	609858	610058	609958
						Peak78	ChrF_C_glabrata_CBS138	809792	809992	809892
						Peak79	ChrG_C_glabrata_CBS138	138793	138993	138893
						Peak80	ChrG_C_glabrata_CBS138	251691	251891	251791
						Peak81	ChrG_C_glabrata_CBS138	331544	331744	331644
						Peak82	ChrG_C_glabrata_CBS138	371604	371804	371704
						Peak83	ChrG_C_glabrata_CBS138	469262	469462	469362
						Peak84	ChrG_C_glabrata_CBS138	575061	575261	575161
						Peak85	ChrG_C_glabrata_CBS138	588648	588848	588748
						Peak86	ChrG_C_glabrata_CBS138	726773	726973	726873
						Peak87	ChrG_C_glabrata_CBS138	866826	867026	866926
						Peak88	ChrH_C_glabrata_CBS138	80443	80643	80543
						Peak89	ChrH_C_glabrata_CBS138	275273	275473	275373
						Peak90	ChrH_C_glabrata_CBS138	350413	350613	350513
						Peak91	ChrH_C_glabrata_CBS138	353157	353357	353257
						Peak92	ChrH_C_glabrata_CBS138	595157	595357	595257
						Peak93	ChrH_C_glabrata_CBS138	661379	661579	661479
						Peak94	ChrH_C_glabrata_CBS138	681899	682099	681999
						Peak95	ChrH_C_glabrata_CBS138	800937	801137	801037
						Peak96	ChrH_C_glabrata_CBS138	801768	801968	801868
						Peak97	ChrH_C_glabrata_CBS138	821220	821420	821320
						Peak98	ChrH_C_glabrata_CBS138	895423	895623	895523
						Peak99	ChrI_C_glabrata_CBS138	9555	9755	9655
						Peak100	ChrI_C_glabrata_CBS138	72206	72406	72306
						Peak101	ChrI_C_glabrata_CBS138	187590	187790	187690
						Peak102	ChrI_C_glabrata_CBS138	231214	231414	231314
						Peak103	ChrI_C_glabrata_CBS138	375977	376177	376077
						Peak104	ChrI_C_glabrata_CBS138	444949	445149	445049
						Peak105	ChrI_C_glabrata_CBS138	467794	467994	467894
						Peak106	ChrI_C_glabrata_CBS138	700302	700502	700402
						Peak107	ChrI_C_glabrata_CBS138	930452	930652	930552
						Peak108	ChrI_C_glabrata_CBS138	940878	941078	940978
						Peak109	ChrI_C_glabrata_CBS138	967048	967248	967148
						Peak110	ChrI_C_glabrata_CBS138	985429	985629	985529
						Peak111	ChrI_C_glabrata_CBS138	990369	990569	990469
						Peak112	ChrJ_C_glabrata_CBS138	38396	38596	38496
						Peak113	ChrJ_C_glabrata_CBS138	146954	147154	147054
						Peak114	ChrJ_C_glabrata_CBS138	148612	148812	148712
						Peak115	ChrJ_C_glabrata_CBS138	253650	253850	253750
						Peak116	ChrJ_C_glabrata_CBS138	284611	284811	284711
						Peak117	ChrJ_C_glabrata_CBS138	377413	377613	377513
						Peak118	ChrJ_C_glabrata_CBS138	383587	383787	383687
						Peak119	ChrJ_C_glabrata_CBS138	499801	500001	499901
						Peak120	ChrJ_C_glabrata_CBS138	1027953	1028153	1028053
						Peak121	ChrK_C_glabrata_CBS138	79554	79754	79654
						Peak122	ChrK_C_glabrata_CBS138	172873	173073	172973
						Peak123	ChrK_C_glabrata_CBS138	181934	182134	182034
						Peak124	ChrK_C_glabrata_CBS138	269370	269570	269470
						Peak125	ChrK_C_glabrata_CBS138	275096	275296	275196
						Peak126	ChrK_C_glabrata_CBS138	597217	597417	597317
						Peak127	ChrK_C_glabrata_CBS138	924778	924978	924878
						Peak128	ChrK_C_glabrata_CBS138	992696	992896	992796
						Peak129	ChrL_C_glabrata_CBS138	188473	188673	188573
						Peak130	ChrL_C_glabrata_CBS138	190020	190220	190120
						Peak131	ChrL_C_glabrata_CBS138	190737	190937	190837
						Peak132	ChrL_C_glabrata_CBS138	196333	196533	196433
						Peak133	ChrL_C_glabrata_CBS138	281885	282085	281985
						Peak134	ChrL_C_glabrata_CBS138	285746	285946	285846
						Peak135	ChrL_C_glabrata_CBS138	425926	426126	426026
						Peak136	ChrL_C_glabrata_CBS138	453448	453648	453548
						Peak137	ChrL_C_glabrata_CBS138	457538	457738	457638
						Peak138	ChrL_C_glabrata_CBS138	642042	642242	642142
						Peak139	ChrL_C_glabrata_CBS138	687875	688075	687975
						Peak140	ChrL_C_glabrata_CBS138	752968	753168	753068
						Peak141	ChrL_C_glabrata_CBS138	1062950	1063150	1063050
						Peak142	ChrL_C_glabrata_CBS138	1169611	1169811	1169711
						Peak143	ChrM_C_glabrata_CBS138	196143	196343	196243
						Peak144	ChrM_C_glabrata_CBS138	222182	222382	222282
						Peak145	ChrM_C_glabrata_CBS138	224172	224372	224272
						Peak146	ChrM_C_glabrata_CBS138	226183	226383	226283
						Peak147	ChrM_C_glabrata_CBS138	230705	230905	230805
						Peak148	ChrM_C_glabrata_CBS138	739006	739206	739106
						Peak149	ChrM_C_glabrata_CBS138	791920	792120	792020
						Peak150	ChrM_C_glabrata_CBS138	1090536	1090736	1090636
						Peak151	ChrM_C_glabrata_CBS138	1161310	1161510	1161410
						Peak152	ChrM_C_glabrata_CBS138	1198708	1198908	1198808
						Peak153	ChrM_C_glabrata_CBS138	1206564	1206764	1206664
						Peak154	ChrA_C_glabrata_CBS138	238870	239070	238970
						Peak155	ChrA_C_glabrata_CBS138	473386	473586	473486
						Peak156	ChrA_C_glabrata_CBS138	484445	484645	484545
						Peak157	ChrB_C_glabrata_CBS138	171336	171536	171436
						Peak158	ChrB_C_glabrata_CBS138	194035	194235	194135
						Peak159	ChrB_C_glabrata_CBS138	390050	390250	390150
						Peak160	ChrB_C_glabrata_CBS138	470026	470226	470126
						Peak161	ChrC_C_glabrata_CBS138	112810	113010	112910
						Peak162	ChrC_C_glabrata_CBS138	289833	290033	289933
						Peak163	ChrC_C_glabrata_CBS138	327345	327545	327445
						Peak164	ChrC_C_glabrata_CBS138	396842	397042	396942
						Peak165	ChrC_C_glabrata_CBS138	489434	489634	489534
						Peak166	ChrC_C_glabrata_CBS138	525868	526068	525968
						Peak167	ChrD_C_glabrata_CBS138	34649	34849	34749
						Peak168	ChrD_C_glabrata_CBS138	273334	273534	273434
						Peak169	ChrD_C_glabrata_CBS138	280517	280717	280617
						Peak170	ChrD_C_glabrata_CBS138	404934	405134	405034
						Peak171	ChrD_C_glabrata_CBS138	450009	450209	450109
						Peak172	ChrD_C_glabrata_CBS138	461529	461729	461629
						Peak173	ChrD_C_glabrata_CBS138	465678	465878	465778
						Peak174	ChrD_C_glabrata_CBS138	519565	519765	519665
						Peak175	ChrD_C_glabrata_CBS138	621638	621838	621738
						Peak176	ChrE_C_glabrata_CBS138	7800	8000	7900
						Peak177	ChrE_C_glabrata_CBS138	549870	550070	549970
						Peak178	ChrF_C_glabrata_CBS138	180636	180836	180736
						Peak179	ChrF_C_glabrata_CBS138	454647	454847	454747
						Peak180	ChrF_C_glabrata_CBS138	502333	502533	502433
						Peak181	ChrF_C_glabrata_CBS138	739643	739843	739743
						Peak182	ChrF_C_glabrata_CBS138	818550	818750	818650
						Peak183	ChrF_C_glabrata_CBS138	819000	819200	819100
						Peak184	ChrF_C_glabrata_CBS138	892446	892646	892546
						Peak185	ChrG_C_glabrata_CBS138	6713	6913	6813
						Peak186	ChrG_C_glabrata_CBS138	77625	77825	77725
						Peak187	ChrG_C_glabrata_CBS138	92564	92764	92664
						Peak188	ChrG_C_glabrata_CBS138	339545	339745	339645
						Peak189	ChrG_C_glabrata_CBS138	560931	561131	561031
						Peak190	ChrG_C_glabrata_CBS138	814435	814635	814535
						Peak191	ChrG_C_glabrata_CBS138	818990	819190	819090
						Peak192	ChrG_C_glabrata_CBS138	884401	884601	884501
						Peak193	ChrG_C_glabrata_CBS138	928688	928888	928788
						Peak194	ChrH_C_glabrata_CBS138	40877	41077	40977
						Peak195	ChrH_C_glabrata_CBS138	194184	194384	194284
						Peak196	ChrH_C_glabrata_CBS138	273560	273760	273660
						Peak197	ChrH_C_glabrata_CBS138	275732	275932	275832
						Peak198	ChrH_C_glabrata_CBS138	658573	658773	658673
						Peak199	ChrH_C_glabrata_CBS138	678983	679183	679083
						Peak200	ChrH_C_glabrata_CBS138	789961	790161	790061
						Peak201	ChrH_C_glabrata_CBS138	799796	799996	799896
						Peak202	ChrH_C_glabrata_CBS138	800505	800705	800605
						Peak203	ChrH_C_glabrata_CBS138	803941	804141	804041
						Peak204	ChrH_C_glabrata_CBS138	981954	982154	982054
						Peak205	ChrI_C_glabrata_CBS138	69625	69825	69725
						Peak206	ChrI_C_glabrata_CBS138	70101	70301	70201
						Peak207	ChrI_C_glabrata_CBS138	336986	337186	337086
						Peak208	ChrI_C_glabrata_CBS138	366651	366851	366751
						Peak209	ChrI_C_glabrata_CBS138	468910	469110	469010
						Peak210	ChrI_C_glabrata_CBS138	538404	538604	538504
						Peak211	ChrI_C_glabrata_CBS138	565509	565709	565609
						Peak212	ChrI_C_glabrata_CBS138	594420	594620	594520
						Peak213	ChrI_C_glabrata_CBS138	595169	595369	595269
						Peak214	ChrI_C_glabrata_CBS138	796352	796552	796452
						Peak215	ChrI_C_glabrata_CBS138	839483	839683	839583
						Peak216	ChrI_C_glabrata_CBS138	873313	873513	873413
						Peak217	ChrI_C_glabrata_CBS138	881481	881681	881581
						Peak218	ChrI_C_glabrata_CBS138	958594	958794	958694
						Peak219	ChrI_C_glabrata_CBS138	1012452	1012652	1012552
						Peak220	ChrJ_C_glabrata_CBS138	69121	69321	69221
						Peak221	ChrJ_C_glabrata_CBS138	108533	108733	108633
						Peak222	ChrJ_C_glabrata_CBS138	172732	172932	172832
						Peak223	ChrJ_C_glabrata_CBS138	183701	183901	183801
						Peak224	ChrJ_C_glabrata_CBS138	245753	245953	245853
						Peak225	ChrJ_C_glabrata_CBS138	260062	260262	260162
						Peak226	ChrJ_C_glabrata_CBS138	435243	435443	435343
						Peak227	ChrJ_C_glabrata_CBS138	496158	496358	496258
						Peak228	ChrJ_C_glabrata_CBS138	728767	728967	728867
						Peak229	ChrJ_C_glabrata_CBS138	919604	919804	919704
						Peak230	ChrK_C_glabrata_CBS138	229364	229564	229464
						Peak231	ChrK_C_glabrata_CBS138	249503	249703	249603
						Peak232	ChrK_C_glabrata_CBS138	456505	456705	456605
						Peak233	ChrK_C_glabrata_CBS138	475166	475366	475266
						Peak234	ChrK_C_glabrata_CBS138	524114	524314	524214
						Peak235	ChrK_C_glabrata_CBS138	524569	524769	524669
						Peak236	ChrK_C_glabrata_CBS138	824463	824663	824563
						Peak237	ChrK_C_glabrata_CBS138	1166809	1167009	1166909
						Peak238	ChrL_C_glabrata_CBS138	277863	278063	277963
						Peak239	ChrL_C_glabrata_CBS138	640647	640847	640747
						Peak240	ChrL_C_glabrata_CBS138	684444	684644	684544
						Peak241	ChrL_C_glabrata_CBS138	753789	753989	753889
						Peak242	ChrL_C_glabrata_CBS138	830919	831119	831019
						Peak243	ChrL_C_glabrata_CBS138	831245	831445	831345
						Peak244	ChrL_C_glabrata_CBS138	832435	832635	832535
						Peak245	ChrL_C_glabrata_CBS138	1061110	1061310	1061210
						Peak246	ChrL_C_glabrata_CBS138	1061891	1062091	1061991
						Peak247	ChrL_C_glabrata_CBS138	1094565	1094765	1094665
						Peak248	ChrL_C_glabrata_CBS138	1350210	1350410	1350310
						Peak249	ChrL_C_glabrata_CBS138	1425087	1425287	1425187
						Peak250	ChrM_C_glabrata_CBS138	708771	708971	708871
						Peak251	ChrM_C_glabrata_CBS138	875019	875219	875119
