# Supplementary material for: Temporal transcriptional response of Candida glabrata during macrophage infection reveals a multifaceted transcriptional regulator CgXbp1 important for macrophage response and fluconazole resistance
Source: eLife. 2024 Oct 2;13:e73832. doi: 10.7554/eLife.73832 (PMC11554308; doi:10.7554/eLife.73832)
Supplement: Supplementary file 7. [file elife-73832-supp7.xlsx]

## Sheet: WT
Supplementary file 7 - FPKM value for CgXbp1 targets in wildtype strain
WT	0.5h	2h	4h	6h	8h
CAGL0A01243g	2.82116	4.0949	3.49	4.27969	5.17084
CAGL0C01056g	12.9622	7.3022	6.04509	7.18103	6.40993
CAGL0C02827g	3.31792	4.44751	3.17631	2.71001	3.04363
CAGL0D00154g	4.68333	2.48632	0.817253	0.763982	0.78827
CAGL0D00176g	7.72852	27.0715	23.663	21.6415	20.042
CAGL0D01265g	1.78486	2.6468	2.78042	9.07053	12.953
CAGL0D05566g	2.27421	2.10114	4.61811	5.57364	5.4773
CAGL0E01353g	7.41434	15.0116	9.60677	10.7975	11.0204
CAGL0E04312g	4.26595	5.19166	7.34842	8.81662	6.87428
CAGL0E04548g	1.71724	3.2431	5.06979	3.29937	4.18512
CAGL0F00407g	3.51059	6.30735	6.70496	12.9413	10.0243
CAGL0F05115g	3.83029	5.12211	6.76569	6.14348	5.08536
CAGL0G02739g	5.64102	2.24335	0.923872	1.49305	2.0064
CAGL0G03905g	2.31918	1.9329	3.9628	3.0579	2.8031
CAGL0H06105g	3.85578	5.76218	5.81675	3.84858	4.41686
CAGL0H08173g	12.9239	13.7075	5.1228	7.32271	4.59542
CAGL0H08393g	6.04033	15.606	23.2755	28.6198	25.6271
CAGL0H09130g	4.73386	7.5187	11.8262	15.3311	14.0509
CAGL0I00110g	4.6978	0.942394	0.80276	1.2974	1.39161
CAGL0I02178g	8.38339	18.8686	19.8834	19.734	15.2425
CAGL0I02574g	1.6139	1.52827	4.25007	10.889	8.07591
CAGL0I04246g	1.04385	0.711172	2.21051	3.44817	4.03099
CAGL0I07249g	4.74984	2.71096	2.55779	1.97598	2.6309
CAGL0I10147g	15.9012	6.23305	6.18056	6.93375	7.59324
CAGL0I10200g	4.64621	1.91816	2.1641	2.21487	2.47017
CAGL0J00473g	2.22806	3.28823	3.11518	4.71096	4.37545
CAGL0J01595g	27.9095	66.8207	91.1018	96.2321	96.5754
CAGL0J02530g	14.4936	8.98919	7.83574	8.37439	7.97837
CAGL0J02948g	17.4686	26.4234	14.6207	25.1467	15.555
CAGL0J04048g	7.38336	5.14559	5.22663	4.91362	2.96062
CAGL0J05159g	22.764	9.58706	9.15165	9.55147	10.7258
CAGL0J10494g	3.77023	2.26477	0.814854	1.06556	0.522473
CAGL0K01969g	3.22496	5.3708	4.24805	3.90038	4.12412
CAGL0L01727g	9.81837	15.0488	14.2102	12.463	12.3291
CAGL0L02453g	2.16645	1.81958	3.15205	5.82234	4.62421
CAGL0L06666g	4.52753	2.58687	2.85908	1.90223	2.41618
CAGL0L09911g	21.172	16.0356	12.9886	12.9605	13.5429
CAGL0M07920g	46.5775	72.1828	94.9642	92.7628	92.5708
CAGL0M11000g	1.36616	2.0143	7.74046	5.33645	4.47726
CAGL0M11660g	3.78149	4.92687	10.1738	27.045	17.6547
CAGL0A02233g	2.92593	22.0399	13.3636	12.6098	10.2355
CAGL0A04829g	2.75777	15.6898	14.52	14.1834	10.2103
CAGL0C05137g	21.5076	28.6527	36.2981	33.7683	30.5822
CAGL0D02640g	1.51098	4.71863	0.884614	1.31774	0.994386
CAGL0D02662g	1.05009	5.23289	0.853487	1.39031	0.998014
CAGL0D04092g	1.36175	5.70971	3.4806	2.28029	2.30794
CAGL0D04708g	23.627	39.5797	46.2859	34.249	40.6372
CAGL0E05566g	3.65517	10.9663	11.084	12.5786	9.66614
CAGL0F07601g	42.2073	60.314	57.2473	35.2113	39.6954
CAGL0G08624g	1.89294	6.39067	11.7299	17.2193	17.8564
CAGL0G09262g	10.1409	2.38141	1.54049	0.858155	1.82475
CAGL0H06633g	3.87244	32.6781	25.9689	14.4179	20.6339
CAGL0H10076g	2.9584	3.03098	9.36632	7.46147	9.46527
CAGL0I05934g	5.98261	4.9989	7.42002	4.69947	5.43631
CAGL0I06182g	12.2517	14.5953	11.725	8.77155	8.99831
CAGL0I06204g	8.96199	12.2172	9.63337	8.18903	7.48482
CAGL0I10340g	13.7822	6.59531	5.17737	6.42719	6.2436
CAGL0J00715g	9.96036	0.74358	0.556475	0.779345	1.39859
CAGL0J01870g	3.95279	2.62377	3.2611	2.95569	2.87285
CAGL0J04554g	1.57137	3.40696	4.48779	6.63829	6.28972
CAGL0J09328g	4.69614	6.25885	5.55734	4.0449	3.5951
CAGL0K02519g	6.67713	7.127	11.8468	9.46901	12.0296
CAGL0K05357g	18.0688	49.4221	24.1288	21.4163	23.4057
CAGL0K12056g	1.49457	4.52745	4.18765	2.97012	3.29949
CAGL0L07502g	25.2569	50.5531	27.7794	19.2143	18.6666
CAGL0L13299g	20.3325	13.3071	11.157	14.716	14.0259
CAGL0M08800g	5.85144	6.37035	7.36769	13.7165	10.7489
CAGL0E01881g	2.55659	3.56066	4.18149	4.31941	3.97091
CAGL0J03960g	1.77998	1.35709	2.87195	3.802	2.56475
CAGL0K01947g	1.11944	3.19755	3.44599	2.68783	3.88525
CAGL0A01628g	2.92915	7.91512	10.8866	10.7089	9.52225
CAGL0G04895g	3.90122	5.8082	7.90446	4.68833	6.30503
CAGL0J02904g	6.28709	10.1152	13.1375	11.2695	11.5115
CAGL0K02739g	2.85416	4.3922	4.84923	3.56402	3.67074
CAGL0A01826g	6.79348	5.12518	5.40194	5.59671	5.81123
CAGL0C01133g	5.17843	5.6634	5.28912	4.87828	4.83018
CAGL0E01837g	4.40615	5.64752	6.0274	5.24488	5.63022
CAGL0F01265g	10.1895	12.4663	8.61775	10.8289	9.27154
CAGL0H06677g	4.40599	5.4162	4.16445	3.61303	3.96917
CAGL0K10164g	74.3637	62.4897	82.8365	61.4306	58.5831
CAGL0D05434g	42.2303	51.6442	46.0446	59.9455	53.9725
CAGL0F01815g	5.20276	5.26092	5.1648	5.42601	5.56422
CAGL0G01034g	5.4997	6.47096	5.30684	7.34479	6.01213
CAGL0G09735g	3.58598	3.06352	3.83805	3.2859	3.63347
CAGL0I10054g	2.98174	3.06554	3.87012	3.14463	3.54373
CAGL0F01837g	4.85257	3.88159	3.48643	3.37232	3.63302
CAGL0J01155g	4.30492	4.59777	4.51348	4.60082	4.61081
CAGL0D05544g	4.08506	4.57655	5.07639	5.53162	5.18033
CAGL0H08371g	4.83492	4.30073	5.57641	4.70043	4.98919
CAGL0D05478g	3.84994	3.92046	4.13774	3.73677	3.68184
CAGL0A01606g	1.12926	0.944992	1.22094	1.35903	1.46455
CAGL0A01892g	1.08704	0.833497	1.00937	0.751134	0.708287
CAGL0A03608g	1.53971	0.79135	0.645503	0.543645	0.683333
CAGL0B01012g	0.795016	0.317778	0.199211	0.335799	0.417809
CAGL0B04213g	0.772081	1.20641	1.03363	0.971054	0.871278
CAGL0B04895g	1.48896	1.08815	1.24984	2.00935	1.66015
CAGL0D04026g	2.34903	2.43301	3.34885	2.23501	2.8173
CAGL0D04686g	1.52143	1.02	1.34931	1.22705	1.30627
CAGL0D05368g	1.5603	2.27122	2.52167	2.17262	2.23825
CAGL0D05456g	0.799764	0.673805	0.557159	0.469228	0.460494
CAGL0E01529g	1.82042	2.26863	2.90928	3.44996	3.01513
CAGL0E01859g	1.93042	1.33962	1.45955	1.49932	1.16667
CAGL0E03674g	2.21025	1.25285	2.114	2.26673	2.47295
CAGL0E03762g	1.42545	1.82238	1.53474	3.11789	2.69004
CAGL0E03894g	1.63535	0.80729	0.872606	0.923375	1.05322
CAGL0E04070g	1.34664	1.76991	1.78048	2.13329	2.08925
CAGL0E04884g	1.94271	2.78894	2.15575	2.03773	2.22523
CAGL0E05676g	1.32744	1.24199	0.934626	1.44543	1.39493
CAGL0E06116g	1.82248	1.40952	2.32878	2.67099	2.36346
CAGL0E06292g	0.771763	0.138105	0.259189	0.288329	0.500857
CAGL0F00649g	1.29011	0.621113	0.369209	0.559944	0.6218
CAGL0F04081g	1.11151	0.719885	0.897334	0.911921	0.948111
CAGL0F04543g	0.808336	0.0501925	0.0242663	0.0593274	0.0826313
CAGL0F04565g	3.03987	3.51273	2.5735	2.30828	2.36641
CAGL0F06127g	0.624775	0.987381	1.19734	1.35864	0.957765
CAGL0F08151g	1.60969	2.26272	1.65019	1.62943	1.5837
CAGL0G01474g	0.546179	0.963037	1.50181	1.60682	1.44915
CAGL0G03421g	2.71681	2.96229	3.73987	3.42109	3.67563
CAGL0G04873g	2.4553	1.95503	2.04034	1.92421	2.11215
CAGL0G05962g	1.98495	1.32727	2.64108	1.67861	1.9512
CAGL0G06182g	1.47669	0.718451	1.64683	2.39062	2.35619
CAGL0G07645g	2.10805	2.01633	2.83901	2.12575	2.13701
CAGL0G09086g	1.18198	0.243037	0.212222	0.208511	0.349409
CAGL0H00825g	1.4697	0.427105	0.829348	1.1732	1.29058
CAGL0H02959g	0.898428	0.406885	1.43546	2.14698	2.21402
CAGL0H03751g	2.95854	3.50851	3.17641	2.67422	2.53931
CAGL0H03773g	0.935432	2.03492	1.57217	2.75313	2.17779
CAGL0H06853g	1.72422	0.328286	0.399441	0.698507	0.443764
CAGL0I00902g	2.70762	2.3195	3.44072	2.86867	3.1029
CAGL0I04884g	2.5257	2.74173	3.44564	3.07706	2.90328
CAGL0I05060g	1.97871	1.27866	2.15987	1.92398	1.79946
CAGL0I09724g	2.08563	0.680142	0.559903	1.89361	1.67822
CAGL0I09834g	1.02436	0.182393	0.173543	0.428376	0.372305
CAGL0I10125g	0.317898	0.256518	0.296567	0.359899	0.432353
CAGL0J01529g	1.9715	2.52006	2.14869	2.31245	2.15455
CAGL0J03982g	0.261261	0.277114	0.35021	0.58816	0.343692
CAGL0K00715g	2.35593	1.18623	1.27475	1.26018	1.20996
CAGL0K02101g	1.40374	0.922083	1.07486	1.28009	1.33765
CAGL0K02959g	1.36015	1.36734	1.68942	1.52178	1.40901
CAGL0K03003g	2.1949	2.3569	2.4439	2.66623	2.22377
CAGL0K06127g	1.09547	0.397378	0.292296	0.342411	0.409679
CAGL0K09350g	1.53496	1.85713	1.25255	0.974559	1.20293
CAGL0L01771g	1.4335	1.09908	0.835853	0.91671	0.874786
CAGL0L03696g	1.35619	0.522187	0.474219	0.564103	0.502034
CAGL0L03916g	2.80729	1.78949	2.0263	1.95019	1.98906
CAGL0L03938g	1.55587	1.52208	2.15742	1.98147	2.04193
CAGL0L05786g	2.0006	0.57398	0.586639	0.607963	0.678744
CAGL0L06072g	0.449211	0.277429	0.300189	0.494317	0.359048
CAGL0L10934g	1.36552	1.27366	1.23589	1.05427	1.21644
CAGL0M01738g	1.61909	1.40178	1.14362	1.50296	1.32653
CAGL0M01870g	1.35596	0.445838	0.584769	0.996823	0.621028
CAGL0M01892g	1.59906	0.259825	0.186866	0.382067	0.304406
CAGL0M07293g	1.10719	0.415944	0.441137	0.690008	0.648879
CAGL0M12012g	1.01374	1.96264	1.75332	1.84316	1.846
CAGL0M12100g	0.751738	0.211292	0.18916	0.292465	0.315319
CAGL0B01875g	0.404083	0.925528	1.66361	1.20552	1.18331
CAGL0B02101g	1.8488	1.59987	1.52224	1.69078	1.63426
CAGL0B03949g	1.12033	1.19779	0.651005	0.615221	0.668692
CAGL0B04851g	1.44126	1.32444	1.10956	1.07358	0.94047
CAGL0C02937g	1.29514	0.917367	0.747212	0.788273	0.911248
CAGL0C03289g	1.20705	0.972249	1.00716	1.84182	1.62545
CAGL0C04004g	0.955334	0.512812	0.57529	0.692439	0.733059
CAGL0C05467g	0.739584	0.198503	0.15855	0.266783	0.350019
CAGL0D00264g	1.26545	0.368856	0.60345	0.886127	0.775674
CAGL0D04576g	1.6386	0.972812	0.685296	0.816191	0.855707
CAGL0D04752g	2.83448	2.28172	2.50243	1.56632	1.69109
CAGL0D06512g	1.86553	0.900578	0.938506	0.965131	1.03887
CAGL0E00110g	1.76746	0.313037	0.183546	0.399482	0.40539
CAGL0F04521g	1.15831	0.572166	0.570041	1.05433	1.09174
CAGL0F04917g	1.16051	0.370891	0.396535	0.508883	0.524568
CAGL0F08217g	1.30468	0.226443	0.202505	0.440123	0.546874
CAGL0F08239g	2.69654	2.31041	3.20362	2.41027	2.74146
CAGL0F09075g	2.67672	2.68659	2.54821	3.70576	3.33511
CAGL0G00110g	0.851166	0.120859	0.0696	0.18002	0.180298
CAGL0G00902g	1.31008	1.78017	1.57532	1.5557	1.58576
CAGL0G03487g	1.17654	0.475483	0.511754	0.488817	0.470609
CAGL0G05808g	1.12567	1.97483	1.90143	1.87252	1.60969
CAGL0G08646g	1.74534	2.82653	3.71338	3.36816	3.33259
CAGL0H00396g	1.15943	1.11268	1.0174	1.28904	1.24095
CAGL0H02145g	1.5811	1.61244	1.39117	1.63108	1.71546
CAGL0H02937g	1.60097	2.30537	1.918	2.17082	2.32663
CAGL0H06831g	2.01891	1.46456	2.67516	1.5807	1.81842
CAGL0H08107g	1.57824	0.273398	0.436503	0.717069	0.577696
CAGL0H08261g	1.64202	0.754155	1.09641	1.24042	1.15039
CAGL0I03872g	1.72323	2.86828	1.67184	2.01458	1.75141
CAGL0I04180g	1.05169	1.28149	1.75018	2.06135	1.87989
CAGL0I05698g	1.65136	2.08591	2.73631	2.92323	2.85696
CAGL0I08195g	1.65264	1.49569	2.17003	2.1514	1.89515
CAGL0I08591g	1.93881	2.6575	2.28041	2.43219	2.34743
CAGL0I08987g	2.02546	2.33413	2.4482	1.86778	2.35612
CAGL0I09086g	2.41072	1.37157	2.85961	2.97739	3.29137
CAGL0J01111g	2.25431	2.016	1.9757	1.68999	2.1255
CAGL0J01774g	2.81165	2.14347	1.73561	2.28937	2.32327
CAGL0J02486g	2.15094	2.1626	1.94591	2.11293	2.07699
CAGL0J02618g	1.08844	0.989969	1.3625	1.48281	1.64297
CAGL0J07502g	1.851	0.815315	1.08394	2.11903	1.75193
CAGL0K02761g	2.62072	2.87064	3.26702	2.75282	2.79536
CAGL0K04697g	1.09289	1.01967	1.02417	1.05318	1.18946
CAGL0K04873g	1.17288	1.23037	1.31656	1.75442	1.6469
CAGL0K08272g	1.64742	1.52938	2.19465	2.50231	2.12361
CAGL0L02431g	1.28027	0.876026	1.11446	0.883122	0.907153
CAGL0L10142g	1.3801	1.19548	2.48004	2.38081	2.4116
CAGL0L12518g	0.336736	0.255903	0.252826	0.369223	0.308267
CAGL0M06941g	0.756592	0.673243	0.941666	1.23111	1.06004
CAGL0A01870g	2.49341	1.09011	0.993198	1.05992	1.18608
CAGL0H00803g	2.33125	2.80321	3.51091	2.5081	2.15109
CAGL0J04026g	1.44133	1.43303	1.84999	1.65688	1.80385
CAGL0M10978g	1.75299	1.07318	1.11414	1.05897	1.11487
CAGL0B02079g	1.72512	0.35893	0.261497	0.535234	0.503138
CAGL0H06809g	0.762382	1.69289	1.59855	1.36948	1.40692
CAGL0D04642g	2.05849	2.65168	2.27748	1.41717	1.65052
CAGL0H06039g	1.43905	0.750296	0.962177	1.16654	1.15341
CAGL0I02156g	2.72907	2.97109	3.39463	2.53221	2.77262
CAGL0K06105g	1.48936	1.52369	1.56521	1.42698	1.53007
CAGL0L10912g	1.56716	0.944469	1.54253	1.4606	1.69084
CAGL0G09273g	1.26212	1.51272	2.13724	1.89008	1.83767
CAGL0H06622g	1.45214	1.16824	1.32039	1.43474	1.48843
CAGL0I10318g	1.17385	1.04438	1.02756	0.943079	0.942361
CAGL0M06963g	0.852446	1.67317	3.05093	3.18052	3.18193
CAGL0C00759g	2.31464	2.03368	1.75691	2.64681	2.41718

## Sheet: Cgxbp1∆
Supplementary file 7 - FPKM value for CgXbp1 targets in Cgxbp1∆ strain
Cgxbp1∆	0.5h	2h	4h	6h	8h
CAGL0A01243g	2.64262	3.08302	2.64616	2.72164	3.23993
CAGL0C01056g	5.30193	7.57962	6.51691	5.37062	6.09008
CAGL0C02827g	3.38465	3.94573	4.15398	3.14547	2.87946
CAGL0D00154g	3.57393	0.822406	0.938316	1.08098	0.782189
CAGL0D00176g	11.9433	18.744	15.4355	10.5201	18.8464
CAGL0D01265g	2.5807	2.12129	3.63292	8.1033	9.2589
CAGL0D05566g	1.67202	2.35434	3.8636	4.86448	5.394
CAGL0E01353g	7.41863	7.56498	9.53063	11.4426	22.2896
CAGL0E04312g	6.59547	5.0305	7.48894	10.3988	12.2032
CAGL0E04548g	3.45507	2.93758	3.73503	3.69727	2.54068
CAGL0F00407g	4.89046	6.14549	8.41172	14.242	19.4791
CAGL0F05115g	5.02758	7.65966	7.12483	3.0441	2.28865
CAGL0G02739g	0.047879	0.0171527	0.0405393	0.0120612	0.0274718
CAGL0G03905g	4.20066	2.30667	2.74923	2.86539	3.50515
CAGL0H06105g	3.02257	3.98614	3.19566	2.89745	3.01925
CAGL0H08173g	8.35697	4.54925	3.26858	1.84881	2.07433
CAGL0H08393g	9.7271	12.0268	18.2819	27.1241	35.0439
CAGL0H09130g	6.12937	7.82741	9.0758	9.28514	10.8712
CAGL0I00110g	1.42114	1.66316	1.73793	2.22326	1.97358
CAGL0I02178g	16.8465	10.8254	9.77074	7.37732	6.4246
CAGL0I02574g	1.63034	2.81216	7.43446	10.8054	20.238
CAGL0I04246g	0.906151	1.24841	1.63069	2.72879	3.31329
CAGL0I07249g	1.92942	1.48118	1.40662	1.68578	1.28464
CAGL0I10147g	5.79793	7.36045	7.41973	7.33808	6.73325
CAGL0I10200g	2.18091	2.28749	2.58968	2.62152	2.40847
CAGL0J00473g	3.10178	3.92183	3.48498	4.55202	4.93822
CAGL0J01595g	51.248	41.2491	49.5733	47.9589	57.6064
CAGL0J02530g	8.62194	6.71346	6.34268	5.56423	5.41267
CAGL0J02948g	14.5437	18.5755	18.9761	13.5197	15.582
CAGL0J04048g	4.24085	7.03791	4.11908	3.36941	2.7743
CAGL0J05159g	9.27096	11.8945	12.3634	12.7463	11.1589
CAGL0J10494g	1.27869	0.658216	0.669634	0.737322	0.823819
CAGL0K01969g	2.34471	2.82281	1.64502	2.30391	2.25229
CAGL0L01727g	8.80938	8.70584	7.72763	6.9446	7.43295
CAGL0L02453g	2.01712	2.80913	5.04201	5.19901	6.74431
CAGL0L06666g	2.90095	2.66762	2.74673	2.76284	2.52353
CAGL0L09911g	10.8545	13.5347	12.2216	10.9006	11.2446
CAGL0M07920g	47.853	72.6089	82.303	98.28	126.515
CAGL0M11000g	11.6438	2.72876	5.87964	5.67104	3.93785
CAGL0M11660g	2.06684	4.02733	28.8954	41.9239	53.7387
CAGL0A02233g	20.0225	16.2167	17.2424	29.5521	29.4132
CAGL0A04829g	19.2523	12.6521	18.9742	15.8147	14.8574
CAGL0C05137g	20.4798	14.953	20.3586	24.2808	26.4157
CAGL0D02640g	3.60809	1.8769	1.58149	1.16797	1.32143
CAGL0D02662g	3.49896	1.77325	1.41052	1.23464	1.22121
CAGL0D04092g	4.1504	3.10562	3.01597	3.95503	4.29683
CAGL0D04708g	34.1885	23.968	26.8796	21.8875	30.7125
CAGL0E05566g	10.0687	9.55143	13.3098	12.1366	15.2123
CAGL0F07601g	48.5185	44.3888	29.3065	19.7511	25.9223
CAGL0G08624g	14.889	8.14068	16.7287	23.1193	28.3376
CAGL0G09262g	12.5876	10.3223	7.96441	5.1108	6.2223
CAGL0H06633g	48.6021	23.9911	16.8395	17.6821	25.6474
CAGL0H10076g	7.07084	7.46663	8.15229	7.02721	11.0193
CAGL0I05934g	7.53546	3.5642	3.08142	3.39948	3.39075
CAGL0I06182g	13.7038	14.9536	13.552	7.75569	7.61795
CAGL0I06204g	12.0285	15.313	14.1033	7.16772	6.94367
CAGL0I10340g	6.18687	6.79106	7.12769	6.46964	5.83682
CAGL0J00715g	5.29356	6.3255	6.2754	4.70683	5.34226
CAGL0J01870g	2.63705	2.16114	2.49522	2.39696	2.28688
CAGL0J04554g	5.02599	7.33422	8.50215	8.9341	13.8036
CAGL0J09328g	5.19642	6.2447	5.39221	3.70991	2.79234
CAGL0K02519g	9.752	4.90859	5.77557	8.29219	9.42456
CAGL0K05357g	42.9521	29.945	23.3779	24.7663	31.8952
CAGL0K12056g	3.61775	3.54661	2.66147	2.97923	2.91039
CAGL0L07502g	25.6668	24.9832	14.251	13.3111	16.8017
CAGL0L13299g	7.80182	10.2498	9.29342	9.4585	9.45239
CAGL0M08800g	3.36583	4.23348	6.90877	7.25852	8.26856
CAGL0E01881g	4.95836	2.67016	3.4476	3.76084	3.96523
CAGL0J03960g	2.18919	2.76481	4.57791	6.78862	7.1458
CAGL0K01947g	2.72742	3.53851	2.37891	2.55396	2.28991
CAGL0A01628g	5.00448	5.19049	9.9119	14.9871	18.995
CAGL0G04895g	5.14293	3.17356	4.14782	3.46551	3.37439
CAGL0J02904g	7.80918	5.45821	6.21146	5.02609	5.17677
CAGL0K02739g	4.16163	4.75924	3.47398	3.40455	3.17343
CAGL0A01826g	4.21889	1.93492	2.36229	4.4665	3.27207
CAGL0C01133g	4.94555	5.45661	4.67224	4.05097	4.24273
CAGL0E01837g	9.02282	3.77287	3.56386	4.7993	4.07514
CAGL0F01265g	5.84731	7.58807	7.04169	6.17955	7.09655
CAGL0H06677g	4.73373	3.63733	3.57464	3.49229	2.925
CAGL0K10164g	75.1839	38.7741	48.0938	33.0895	31.458
CAGL0D05434g	35.6566	30.9857	27.5251	23.5269	35.4436
CAGL0F01815g	2.5506	2.82124	2.46592	3.30201	3.06856
CAGL0G01034g	4.30801	6.26352	5.86313	5.22703	6.17095
CAGL0G09735g	2.7269	2.59021	2.62633	2.35388	2.26126
CAGL0I10054g	3.19564	2.09771	2.74278	2.59014	2.82155
CAGL0F01837g	2.81566	2.80799	3.21636	2.95957	2.78284
CAGL0J01155g	1.93622	3.17152	2.29018	3.05492	3.46355
CAGL0D05544g	3.51415	3.17991	3.76445	3.94337	4.14267
CAGL0H08371g	3.42239	3.69939	3.47071	3.54177	3.16367
CAGL0D05478g	2.72268	3.37011	2.74755	2.63947	2.65406
CAGL0A01606g	1.14145	0.601435	1.22673	1.57258	1.29784
CAGL0A01892g	0.571854	0.387326	0.616356	0.654329	0.456366
CAGL0A03608g	0.648126	0.817658	1.01371	1.19046	1.26517
CAGL0B01012g	0.629937	0.725945	0.721638	0.720279	0.741771
CAGL0B04213g	4.34991	1.49315	1.33135	2.15784	1.42243
CAGL0B04895g	1.48759	1.16395	1.53576	1.58392	1.58813
CAGL0D04026g	5.5047	2.23238	2.22763	3.05931	2.14093
CAGL0D04686g	1.16954	1.03924	1.42096	1.39345	1.37219
CAGL0D05368g	1.69718	2.69972	1.58529	1.96442	2.16562
CAGL0D05456g	0.475837	0.849269	0.500246	0.349421	0.431254
CAGL0E01529g	1.51878	2.23008	2.81365	3.03566	4.02988
CAGL0E01859g	2.64984	1.85125	1.64922	2.07002	1.76117
CAGL0E03674g	2.21241	1.58233	1.76411	2.62182	2.48343
CAGL0E03762g	1.41813	1.19434	1.95763	3.69167	4.70357
CAGL0E03894g	1.15978	1.1108	1.19745	1.77641	1.27443
CAGL0E04070g	1.66509	1.401	1.66208	1.5984	1.35989
CAGL0E04884g	2.3777	1.61214	1.74758	2.13635	1.822
CAGL0E05676g	1.88471	1.7494	1.63012	1.68681	1.82851
CAGL0E06116g	2.60462	1.33977	2.29982	3.21626	3.37211
CAGL0E06292g	0.262606	0.5491	0.637265	0.704973	0.448583
CAGL0F00649g	0.837553	0.931599	0.786942	0.902452	0.857789
CAGL0F04081g	1.1386	0.912458	1.17677	1.61564	1.27534
CAGL0F04543g	0.0847826	0.206795	0.167259	0.165424	0.0262081
CAGL0F04565g	6.71702	3.97307	2.91407	2.96311	2.73089
CAGL0F06127g	0.991714	1.31936	1.33897	1.39977	1.5214
CAGL0F08151g	1.44254	2.08975	1.57976	1.69565	1.86823
CAGL0G01474g	1.18148	1.40186	1.64962	2.19026	1.75264
CAGL0G03421g	3.39917	3.28737	3.30111	2.81159	3.03189
CAGL0G04873g	1.69741	2.16908	2.04416	1.93099	1.82397
CAGL0G05962g	2.54989	1.37966	2.38208	2.69221	1.81952
CAGL0G06182g	0.865777	1.49943	2.37608	2.2846	2.84057
CAGL0G07645g	2.06534	1.3135	1.82619	1.67476	1.59297
CAGL0G09086g	0.348035	0.596277	0.461612	0.765664	0.721003
CAGL0H00825g	0.863979	1.10177	1.11106	1.51781	1.63972
CAGL0H02959g	1.2045	1.00794	2.34858	2.97176	4.47792
CAGL0H03751g	3.04826	3.54008	3.1673	2.7264	2.49376
CAGL0H03773g	1.94975	2.39544	1.90226	2.37879	2.64518
CAGL0H06853g	0.914285	1.11978	1.11763	1.17633	1.11589
CAGL0I00902g	2.95329	2.45811	3.02011	2.68954	2.49425
CAGL0I04884g	2.86183	3.0591	2.76181	2.5654	2.07374
CAGL0I05060g	2.8407	2.46757	3.09142	2.43423	2.0043
CAGL0I09724g	1.06136	0.846684	1.44692	1.57858	1.94906
CAGL0I09834g	0.733052	0.81245	0.595423	1.10536	0.742134
CAGL0I10125g	0.47661	0.210271	0.309935	0.387452	0.198212
CAGL0J01529g	2.57423	2.43909	2.49421	1.99334	1.85411
CAGL0J03982g	0.713095	0.436138	0.608725	0.734134	0.638143
CAGL0K00715g	1.28895	1.3764	1.68441	1.45865	1.82027
CAGL0K02101g	0.985287	1.23337	1.22844	1.32152	1.20154
CAGL0K02959g	2.02725	1.88137	1.75474	1.72714	1.5954
CAGL0K03003g	3.22027	2.99109	2.8359	2.56134	2.57808
CAGL0K06127g	0.488661	0.560193	0.609279	0.721523	0.849429
CAGL0K09350g	2.23336	1.43956	1.63155	2.20233	1.63575
CAGL0L01771g	1.3726	1.29639	1.2943	1.2058	1.11977
CAGL0L03696g	0.637919	0.859143	0.813524	0.89071	0.981326
CAGL0L03916g	2.50746	2.15701	2.04004	1.89713	1.52541
CAGL0L03938g	2.55236	1.82002	2.05131	2.2128	1.87009
CAGL0L05786g	1.62694	1.5014	1.26474	1.84396	1.54214
CAGL0L06072g	0.556106	0.661608	0.531735	1.05138	0.743319
CAGL0L10934g	1.0294	1.48792	1.36714	1.54565	1.15034
CAGL0M01738g	1.30526	1.73554	1.53893	1.67184	1.37511
CAGL0M01870g	0.768275	0.760033	0.849211	1.10035	0.987914
CAGL0M01892g	0.811566	0.600727	0.550876	0.872857	0.859212
CAGL0M07293g	0.781389	0.813432	0.824545	1.15799	0.887659
CAGL0M12012g	2.20823	2.08425	1.92418	1.77318	1.91504
CAGL0M12100g	0.61056	0.563696	0.739222	0.764051	0.523683
CAGL0B01875g	8.30596	2.48425	3.13327	2.92683	3.26457
CAGL0B02101g	1.26243	1.59659	1.58929	1.75635	1.61783
CAGL0B03949g	1.06766	1.16243	0.97029	1.23474	1.12713
CAGL0B04851g	1.43133	1.54807	1.44439	1.30228	0.921182
CAGL0C02937g	1.21958	1.39731	1.39724	1.29135	1.10657
CAGL0C03289g	1.22579	1.12026	1.66703	2.42915	2.82735
CAGL0C04004g	0.928237	0.767227	1.05855	1.11463	0.682845
CAGL0C05467g	0.365611	0.380815	0.563322	0.634851	0.527377
CAGL0D00264g	0.603728	0.640345	0.964687	0.909531	0.802689
CAGL0D04576g	0.786	1.08474	1.16463	1.24941	1.02309
CAGL0D04752g	2.29338	1.64818	2.51805	3.03386	2.85787
CAGL0D06512g	1.40617	0.997494	1.18624	1.10693	0.853441
CAGL0E00110g	1.29043	1.64488	1.53742	1.77728	1.63693
CAGL0F04521g	1.67455	1.63083	1.80497	1.4153	1.58861
CAGL0F04917g	0.665284	0.566079	0.888286	0.969656	0.667321
CAGL0F08217g	0.611306	0.642254	0.689104	0.768665	0.809816
CAGL0F08239g	2.40527	2.37638	2.72143	2.92348	2.12549
CAGL0F09075g	2.99679	3.05639	3.79397	3.27065	4.06586
CAGL0G00110g	0.2145	0.383031	0.475293	0.483642	0.438756
CAGL0G00902g	1.44834	1.87036	1.63211	1.76246	1.30158
CAGL0G03487g	0.793166	0.713597	0.773042	1.11502	0.754458
CAGL0G05808g	2.01713	2.03537	2.13323	2.07844	2.24084
CAGL0G08646g	4.38965	2.60804	3.23808	4.16592	3.76009
CAGL0H00396g	1.37901	1.43894	1.41129	1.5058	1.22711
CAGL0H02145g	1.25166	1.29576	1.54738	1.39879	1.54822
CAGL0H02937g	1.72902	2.27903	2.29779	2.52641	2.9877
CAGL0H06831g	4.63911	2.30372	1.47906	2.72993	2.64596
CAGL0H08107g	0.743876	0.894702	1.1463	1.04715	0.878872
CAGL0H08261g	0.968898	0.815532	1.14721	1.33573	1.28642
CAGL0I03872g	1.92869	2.87338	2.42538	1.56843	1.27804
CAGL0I04180g	2.23971	2.16341	2.34064	2.11736	2.42329
CAGL0I05698g	3.30747	2.31649	2.76394	2.73907	2.63601
CAGL0I08195g	2.17783	1.90028	2.22559	2.52332	2.18959
CAGL0I08591g	1.04999	1.36954	1.38185	1.56083	1.77877
CAGL0I08987g	2.18121	2.07265	2.11237	2.22099	2.00595
CAGL0I09086g	1.50141	1.53127	2.391	2.57468	2.48118
CAGL0J01111g	1.71451	1.83622	1.69012	1.69489	1.62885
CAGL0J01774g	1.894	2.17257	2.16064	2.08164	1.94533
CAGL0J02486g	1.94265	2.17676	2.11059	2.21524	1.97823
CAGL0J02618g	1.50914	1.6649	2.10725	2.11485	1.56701
CAGL0J07502g	1.05912	1.24524	1.84605	1.65019	1.37633
CAGL0K02761g	2.71971	2.73813	2.23234	2.17199	1.86159
CAGL0K04697g	1.45184	1.06856	1.38095	1.30768	1.16747
CAGL0K04873g	1.55492	1.48553	1.89737	2.36979	2.47562
CAGL0K08272g	1.74797	1.56647	1.86432	2.2686	2.00557
CAGL0L02431g	1.05038	1.27029	1.07376	1.15933	1.04296
CAGL0L10142g	2.4647	1.97389	2.09815	2.81505	2.76617
CAGL0L12518g	0.929333	0.578667	0.739243	1.00733	0.951582
CAGL0M06941g	0.877698	0.903824	1.06366	1.27099	1.31526
CAGL0A01870g	1.80563	1.15007	1.28954	1.39077	0.982404
CAGL0H00803g	1.87054	2.78691	2.60082	2.41228	2.05281
CAGL0J04026g	2.12731	1.44182	1.81406	1.77278	1.45815
CAGL0M10978g	1.23536	1.25096	1.24448	1.2557	1.40471
CAGL0B02079g	0.392683	0.721156	0.809235	1.03568	0.827524
CAGL0H06809g	2.02984	2.18676	1.61312	2.02971	1.67685
CAGL0D04642g	2.21783	3.1124	2.16213	1.5731	1.54133
CAGL0H06039g	0.948097	1.02671	1.23248	1.36034	1.30344
CAGL0I02156g	3.09387	2.97078	2.79245	2.66176	2.3121
CAGL0K06105g	2.42716	1.17772	1.24534	1.55923	1.1202
CAGL0L10912g	1.17837	1.41491	1.43839	2.14411	1.81373
CAGL0G09273g	1.5005	1.33779	1.68467	1.91345	2.04238
CAGL0H06622g	1.82734	1.43012	1.20958	1.88854	1.28764
CAGL0I10318g	1.10038	1.15778	1.20856	1.19182	0.949916
CAGL0M06963g	2.22285	1.86007	2.47963	2.09739	1.93783
CAGL0C00759g	1.77589	2.2494	1.97126	2.28303	2.25517

## Sheet: FC
Supplementary file 7 - Fold Change of FPKM between Cgxbp1∆ and wildtype
fold change	0.5h	2h	4h	6h	8h	Upregulated during infection	Downregulated during infection
CAGL0A01243g	0.936712	0.752893	0.758213	0.635944	0.626578		√
CAGL0C01056g	0.409029	1.03799	1.07805	0.747889	0.9501		√
CAGL0C02827g	1.02011	0.887177	1.3078	1.16069	0.946064
CAGL0D00154g	0.763117	0.330772	1.14813	1.41492	0.992286		√
CAGL0D00176g	1.54535	0.692389	0.652305	0.486106	0.940347	√	√
CAGL0D01265g	1.44588	0.801452	1.30661	0.893366	0.714809
CAGL0D05566g	0.73521	1.12051	0.836618	0.872764	0.984792
CAGL0E01353g	1.00058	0.503941	0.992075	1.05975	2.02258	√	√
CAGL0E04312g	1.54607	0.968957	1.01912	1.17945	1.7752	√
CAGL0E04548g	2.01198	0.905794	0.736723	1.1206	0.607075	√	√
CAGL0F00407g	1.39306	0.974338	1.25455	1.10051	1.94319	√
CAGL0F05115g	1.31258	1.49541	1.05308	0.495501	0.450046		√
CAGL0G02739g	0.00848764	0.00764605	0.0438798	0.00807822	0.0136921		√
CAGL0G03905g	1.81127	1.19337	0.693761	0.937045	1.25046	√
CAGL0H06105g	0.783906	0.691777	0.549389	0.752862	0.683572		√
CAGL0H08173g	0.646631	0.33188	0.638045	0.252476	0.451391		√
CAGL0H08393g	1.61036	0.770651	0.785458	0.947739	1.36745	√
CAGL0H09130g	1.29479	1.04106	0.767433	0.605643	0.773698		√
CAGL0I00110g	0.302512	1.76483	2.16494	1.71363	1.4182	√	√
CAGL0I02178g	2.00951	0.573724	0.491402	0.373837	0.421492	√	√
CAGL0I02574g	1.01019	1.8401	1.74926	0.992322	2.50597	√
CAGL0I04246g	0.868083	1.75543	0.737698	0.791372	0.821955	√
CAGL0I07249g	0.406207	0.546365	0.549934	0.853136	0.488287		√
CAGL0I10147g	0.364622	1.18087	1.20049	1.05831	0.886743		√
CAGL0I10200g	0.469394	1.19254	1.19665	1.1836	0.975021		√
CAGL0J00473g	1.39214	1.19268	1.11871	0.96626	1.12862
CAGL0J01595g	1.83622	0.61731	0.544153	0.498367	0.596491	√	√
CAGL0J02530g	0.59488	0.746836	0.809456	0.664435	0.678418		√
CAGL0J02948g	0.832567	0.702995	1.29789	0.537634	1.00173		√
CAGL0J04048g	0.57438	1.36776	0.788095	0.685728	0.937065		√
CAGL0J05159g	0.407265	1.24068	1.35095	1.33448	1.04038		√
CAGL0J10494g	0.339153	0.290632	0.821784	0.691955	1.57677	√	√
CAGL0K01969g	0.727051	0.525585	0.387241	0.590688	0.546127		√
CAGL0L01727g	0.897234	0.578508	0.543809	0.557217	0.602877		√
CAGL0L02453g	0.931069	1.54383	1.5996	0.892942	1.45848	√
CAGL0L06666g	0.640736	1.03121	0.960707	1.45242	1.04443		√
CAGL0L09911g	0.51268	0.844042	0.94095	0.841058	0.830293		√
CAGL0M07920g	1.02738	1.0059	0.866674	1.05948	1.36668
CAGL0M11000g	8.523	1.35469	0.759598	1.0627	0.879523	√
CAGL0M11660g	0.546568	0.817422	2.84017	1.55015	3.04388	√	√
CAGL0A02233g	6.84313	0.735787	1.29026	2.34358	2.87364	√
CAGL0A04829g	6.98112	0.806393	1.30677	1.11501	1.45513	√
CAGL0C05137g	0.952213	0.521869	0.560872	0.719042	0.863762		√
CAGL0D02640g	2.38791	0.397763	1.78777	0.886342	1.32889	√	√
CAGL0D02662g	3.33204	0.338866	1.65266	0.888028	1.22364	√	√
CAGL0D04092g	3.04786	0.543919	0.866509	1.73444	1.86176	√	√
CAGL0D04708g	1.44701	0.605562	0.580729	0.639069	0.755773		√
CAGL0E05566g	2.75466	0.870982	1.20081	0.964859	1.57377	√
CAGL0F07601g	1.14953	0.735961	0.511928	0.560933	0.653028		√
CAGL0G08624g	7.86552	1.27384	1.42616	1.34264	1.58698	√
CAGL0G09262g	1.24126	4.33452	5.17004	5.95556	3.40995	√
CAGL0H06633g	12.5508	0.734164	0.648449	1.22639	1.24297	√	√
CAGL0H10076g	2.39009	2.46343	0.870384	0.9418	1.16418	√
CAGL0I05934g	1.25956	0.712997	0.415285	0.723374	0.623724		√
CAGL0I06182g	1.11852	1.02455	1.15582	0.884187	0.846598
CAGL0I06204g	1.34217	1.2534	1.464	0.875284	0.9277
CAGL0I10340g	0.448902	1.02968	1.3767	1.0066	0.934848		√
CAGL0J00715g	0.531462	8.50682	11.2771	6.03946	3.81975	√	√
CAGL0J01870g	0.667137	0.823677	0.765147	0.810964	0.796034
CAGL0J04554g	3.19847	2.15272	1.89451	1.34584	2.19464	√
CAGL0J09328g	1.10653	0.99774	0.970286	0.917181	0.776708
CAGL0K02519g	1.46051	0.688731	0.48752	0.87572	0.783444		√
CAGL0K05357g	2.37715	0.605904	0.968878	1.15642	1.36271	√	√
CAGL0K12056g	2.4206	0.783357	0.635553	1.00307	0.882073	√	√
CAGL0L07502g	1.01623	0.494197	0.513008	0.692771	0.900093		√
CAGL0L13299g	0.383712	0.770256	0.832971	0.642735	0.673922		√
CAGL0M08800g	0.575214	0.66456	0.937712	0.52918	0.769247		√
CAGL0E01881g	1.93944	0.749906	0.824491	0.870682	0.998569	√
CAGL0J03960g	1.22989	2.0373	1.59401	1.78554	2.78616	√
CAGL0K01947g	2.43642	1.10663	0.690341	0.950196	0.589384	√	√
CAGL0A01628g	1.70851	0.655769	0.910472	1.3995	1.9948	√	√
CAGL0G04895g	1.31829	0.546393	0.524744	0.739177	0.535191		√
CAGL0J02904g	1.2421	0.539605	0.472803	0.44599	0.449706		√
CAGL0K02739g	1.45809	1.08357	0.716399	0.955254	0.86452
CAGL0A01826g	0.62102	0.377532	0.437304	0.798058	0.563059		√
CAGL0C01133g	0.955029	0.963487	0.88337	0.830411	0.87838
CAGL0E01837g	2.04778	0.668058	0.591276	0.915045	0.723798	√	√
CAGL0F01265g	0.573856	0.608685	0.817115	0.570654	0.765413		√
CAGL0H06677g	1.07438	0.671566	0.85837	0.966582	0.736932
CAGL0K10164g	1.01103	0.620489	0.580587	0.538649	0.53698		√
CAGL0D05434g	0.844338	0.599983	0.597791	0.392472	0.656698		√
CAGL0F01815g	0.49024	0.536263	0.477447	0.608552	0.55148		√
CAGL0G01034g	0.783318	0.967943	1.10483	0.711666	1.02642
CAGL0G09735g	0.760433	0.845501	0.684289	0.716357	0.622342		√
CAGL0I10054g	1.07174	0.684289	0.708707	0.823672	0.79621
CAGL0F01837g	0.580241	0.723413	0.922538	0.877609	0.765987		√
CAGL0J01155g	0.449768	0.689796	0.507408	0.663994	0.75118		√
CAGL0D05544g	0.860245	0.694827	0.741561	0.712877	0.799692
CAGL0H08371g	0.707847	0.860178	0.622392	0.753499	0.634106		√
CAGL0D05478g	0.707202	0.859622	0.664022	0.70635	0.720851		√
CAGL0A01606g	1.0108	0.636445	1.00474	1.15713	0.886168		√
CAGL0A01892g	0.526064	0.4647	0.610632	0.871121	0.644324		√
CAGL0A03608g	0.42094	1.03325	1.57043	2.18977	1.85147	√	√
CAGL0B01012g	0.792358	2.28444	3.62249	2.14497	1.77538	√
CAGL0B04213g	5.634	1.23768	1.28804	2.22216	1.63258	√
CAGL0B04895g	0.999082	1.06966	1.22876	0.788274	0.956616
CAGL0D04026g	2.34339	0.917538	0.665193	1.36881	0.759921	√	√
CAGL0D04686g	0.768711	1.01886	1.0531	1.13561	1.05046
CAGL0D05368g	1.08773	1.18866	0.628667	0.904169	0.967551		√
CAGL0D05456g	0.594972	1.26041	0.897851	0.744672	0.936502		√
CAGL0E01529g	0.834302	0.983006	0.967129	0.879911	1.33655
CAGL0E01859g	1.37267	1.38192	1.12996	1.38063	1.50957	√
CAGL0E03674g	1.00098	1.26299	0.834488	1.15665	1.00424
CAGL0E03762g	0.994867	0.65537	1.27555	1.18403	1.74851	√	√
CAGL0E03894g	0.709192	1.37596	1.37227	1.92382	1.21003	√
CAGL0E04070g	1.23648	0.791566	0.933503	0.749266	0.650899		√
CAGL0E04884g	1.22391	0.578049	0.810661	1.0484	0.818789		√
CAGL0E05676g	1.4198	1.40855	1.74414	1.167	1.31083	√
CAGL0E06116g	1.42916	0.950509	0.987566	1.20414	1.42677
CAGL0E06292g	0.340268	3.97595	2.45869	2.44503	0.895631	√	√
CAGL0F00649g	0.649211	1.49989	2.13143	1.61168	1.37952	√	√
CAGL0F04081g	1.02437	1.26751	1.3114	1.77169	1.34514	√
CAGL0F04543g	0.104885	4.12004	6.89266	2.78833	0.317169	√	√
CAGL0F04565g	2.20964	1.13105	1.13234	1.28369	1.15402	√
CAGL0F06127g	1.58731	1.33622	1.11829	1.03028	1.58849	√
CAGL0F08151g	0.896162	0.923556	0.957321	1.04064	1.17966
CAGL0G01474g	2.16317	1.45566	1.09842	1.36311	1.20942	√
CAGL0G03421g	1.25116	1.10974	0.88268	0.821842	0.824863
CAGL0G04873g	0.691325	1.10949	1.00187	1.00352	0.863563
CAGL0G05962g	1.28461	1.03947	0.901934	1.60384	0.932513	√
CAGL0G06182g	0.586297	2.08703	1.44282	0.955649	1.20558	√	√
CAGL0G07645g	0.979742	0.65143	0.64325	0.787845	0.745422		√
CAGL0G09086g	0.29445	2.45344	2.17514	3.67206	2.06349	√	√
CAGL0H00825g	0.587861	2.57963	1.33967	1.29374	1.27052	√	√
CAGL0H02959g	1.34068	2.47722	1.63612	1.38416	2.02253	√
CAGL0H03751g	1.03032	1.009	0.997131	1.01951	0.982065
CAGL0H03773g	2.08434	1.17717	1.20996	0.864028	1.21461	√
CAGL0H06853g	0.53026	3.41098	2.79798	1.68407	2.51459	√	√
CAGL0I00902g	1.09073	1.05976	0.877756	0.937555	0.803845
CAGL0I04884g	1.13308	1.11576	0.801538	0.833719	0.714274
CAGL0I05060g	1.43563	1.92981	1.4313	1.26521	1.11383	√
CAGL0I09724g	0.508893	1.24486	2.58424	0.833637	1.16139	√	√
CAGL0I09834g	0.715622	4.45439	3.43099	2.58036	1.99335	√
CAGL0I10125g	1.49926	0.819712	1.04508	1.07656	0.458449	√	√
CAGL0J01529g	1.30572	0.967871	1.16081	0.862001	0.860559
CAGL0J03982g	2.72944	1.57386	1.73817	1.24819	1.85673	√
CAGL0K00715g	0.547108	1.16031	1.32137	1.15749	1.5044	√	√
CAGL0K02101g	0.7019	1.33759	1.14288	1.03237	0.898244
CAGL0K02959g	1.49046	1.37593	1.03867	1.13495	1.13229
CAGL0K03003g	1.46716	1.26908	1.1604	0.960659	1.15933
CAGL0K06127g	0.446075	1.40972	2.08446	2.10718	2.0734	√	√
CAGL0K09350g	1.45499	0.775155	1.30258	2.25982	1.3598	√
CAGL0L01771g	0.957516	1.17953	1.54847	1.31536	1.28005	√
CAGL0L03696g	0.470376	1.64528	1.7155	1.57899	1.9547	√	√
CAGL0L03916g	0.893197	1.20538	1.00678	0.972791	0.7669
CAGL0L03938g	1.64047	1.19574	0.950818	1.11675	0.915843	√
CAGL0L05786g	0.813225	2.61577	2.15591	3.03301	2.27205	√
CAGL0L06072g	1.23796	2.38479	1.77133	2.12694	2.07025	√
CAGL0L10934g	0.753849	1.16822	1.1062	1.46608	0.945662
CAGL0M01738g	0.806169	1.2381	1.34566	1.11237	1.03662
CAGL0M01870g	0.566591	1.70473	1.45222	1.10386	1.59077	√	√
CAGL0M01892g	0.507527	2.31204	2.94797	2.28456	2.82258	√	√
CAGL0M07293g	0.705741	1.95563	1.86913	1.67823	1.36799	√
CAGL0M12012g	2.1783	1.06196	1.09745	0.962034	1.0374	√
CAGL0M12100g	0.812197	2.66786	3.90793	2.61245	1.6608	√
CAGL0B01875g	20.5551	2.68415	1.88342	2.42786	2.75886	√
CAGL0B02101g	0.682838	0.997952	1.04405	1.03878	0.989945
CAGL0B03949g	0.952994	0.97048	1.49045	2.00698	1.68558	√
CAGL0B04851g	0.993112	1.16885	1.30177	1.21302	0.979491
CAGL0C02937g	0.941662	1.52317	1.86994	1.63821	1.21434	√
CAGL0C03289g	1.01553	1.15224	1.65518	1.31889	1.73942	√
CAGL0C04004g	0.971636	1.49612	1.84003	1.60971	0.931501	√
CAGL0C05467g	0.494347	1.91843	3.55297	2.37965	1.50671	√	√
CAGL0D00264g	0.477084	1.73603	1.59862	1.02641	1.03483	√	√
CAGL0D04576g	0.479678	1.11506	1.69946	1.53078	1.1956	√	√
CAGL0D04752g	0.809099	0.722341	1.00624	1.93693	1.68995	√
CAGL0D06512g	0.753765	1.10762	1.26397	1.14692	0.821512
CAGL0E00110g	0.730103	5.25459	8.37621	4.44897	4.03792	√
CAGL0F04521g	1.44568	2.85027	3.16639	1.34237	1.45511	√
CAGL0F04917g	0.573271	1.52627	2.24012	1.90546	1.27213	√	√
CAGL0F08217g	0.46855	2.83627	3.4029	1.74648	1.48081	√	√
CAGL0F08239g	0.891983	1.02855	0.849486	1.21293	0.775313
CAGL0F09075g	1.11957	1.13764	1.48888	0.882585	1.21911
CAGL0G00110g	0.252007	3.16925	6.82892	2.6866	2.43351	√	√
CAGL0G00902g	1.10554	1.05067	1.03605	1.1329	0.820791
CAGL0G03487g	0.674153	1.50078	1.51057	2.28105	1.60315	√
CAGL0G05808g	1.79193	1.03066	1.12191	1.10996	1.3921	√
CAGL0G08646g	2.51508	0.922702	0.872004	1.23686	1.12828	√
CAGL0H00396g	1.18938	1.29323	1.38715	1.16815	0.988852
CAGL0H02145g	0.791638	0.803601	1.11229	0.857586	0.902507
CAGL0H02937g	1.07998	0.988573	1.19802	1.16381	1.28413
CAGL0H06831g	2.29783	1.57297	0.552885	1.72704	1.45509	√	√
CAGL0H08107g	0.471334	3.27253	2.62611	1.46032	1.52134	√	√
CAGL0H08261g	0.590063	1.08139	1.04633	1.07684	1.11824		√
CAGL0I03872g	1.11923	1.00178	1.45073	0.778536	0.729723
CAGL0I04180g	2.12963	1.6882	1.33737	1.02717	1.28906	√
CAGL0I05698g	2.00288	1.11054	1.0101	0.937	0.922662	√
CAGL0I08195g	1.31779	1.27051	1.0256	1.17287	1.15537
CAGL0I08591g	0.541564	0.51535	0.605963	0.641741	0.757753		√
CAGL0I08987g	1.0769	0.887974	0.862825	1.18911	0.851378
CAGL0I09086g	0.622805	1.11643	0.836128	0.864743	0.753843		√
CAGL0J01111g	0.760549	0.910824	0.855454	1.0029	0.766335
CAGL0J01774g	0.673625	1.01357	1.24489	0.909263	0.837327
CAGL0J02486g	0.903164	1.00655	1.08463	1.04842	0.952454
CAGL0J02618g	1.38652	1.68177	1.54661	1.42624	0.953764	√
CAGL0J07502g	0.57219	1.52731	1.70309	0.778748	0.785607	√	√
CAGL0K02761g	1.03777	0.953842	0.683294	0.789006	0.665955		√
CAGL0K04697g	1.32845	1.04794	1.34836	1.24166	0.98151
CAGL0K04873g	1.32573	1.20738	1.44116	1.35075	1.50321	√
CAGL0K08272g	1.06104	1.02425	0.849485	0.906602	0.944418
CAGL0L02431g	0.820433	1.45006	0.963483	1.31276	1.14971
CAGL0L10142g	1.78588	1.65113	0.846017	1.18239	1.14703	√
CAGL0L12518g	2.75983	2.26128	2.92392	2.72826	3.08688	√
CAGL0M06941g	1.16007	1.34249	1.12955	1.03239	1.24076
CAGL0A01870g	0.724159	1.055	1.29837	1.31215	0.828276
CAGL0H00803g	0.802376	0.994188	0.740783	0.961796	0.95431
CAGL0J04026g	1.47593	1.00613	0.980578	1.06995	0.808358
CAGL0M10978g	0.704714	1.16566	1.11698	1.18578	1.25998
CAGL0B02079g	0.227626	2.00918	3.09463	1.93501	1.64472	√	√
CAGL0H06809g	2.6625	1.29173	1.00912	1.4821	1.19186	√
CAGL0D04642g	1.07741	1.17375	0.949354	1.11003	0.933846
CAGL0H06039g	0.658834	1.3684	1.28092	1.16614	1.13007		√
CAGL0I02156g	1.13367	0.999894	0.822609	1.05116	0.833903
CAGL0K06105g	1.62967	0.772938	0.795636	1.09268	0.732122	√
CAGL0L10912g	0.751918	1.49811	0.932487	1.46797	1.07268
CAGL0G09273g	1.18887	0.884359	0.788247	1.01236	1.1114
CAGL0H06622g	1.25838	1.22417	0.916077	1.3163	0.865096
CAGL0I10318g	0.937415	1.10857	1.17614	1.26375	1.00802
CAGL0M06963g	2.60762	1.1117	0.812744	0.65945	0.609009	√	√
CAGL0C00759g	0.767242	1.10607	1.12201	0.86256	0.932976
