# Supplementary material for: Temporal transcriptional response of Candida glabrata during macrophage infection reveals a multifaceted transcriptional regulator CgXbp1 important for macrophage response and fluconazole resistance
Source: eLife. 2024 Oct 2;13:e73832. doi: 10.7554/eLife.73832 (PMC11554308; doi:10.7554/eLife.73832)
Supplement: Supplementary file 8. [file elife-73832-supp8.xlsx]

## Sheet: GO_CgXbp1 targets
Supplementary File 8: List of enriched GO-terms for biological processes from CgXbp1 targets upon macrophage infection
S. No.	ID	Description	GeneRatio	BgRatio	pvalue	p.adjust	qvalue	geneID	Count
1	GO:0055085	transmembrane transport	27/217	302/5293	0.0001	0.0468	0.0451	CAGL0A01243g/CAGL0A01826g/CAGL0B01012g/CAGL0B04213g/CAGL0D00154g/CAGL0E01353g/CAGL0E03674g/CAGL0E03894g/CAGL0H08393g/CAGL0I02178g/CAGL0I09724g/CAGL0J02948g/CAGL0L03696g/CAGL0M07293g/CAGL0A02233g/CAGL0A04829g/CAGL0C03289g/CAGL0D02640g/CAGL0D02662g/CAGL0D04708g/CAGL0G08624g/CAGL0I03872g/CAGL0I09086g/CAGL0J01870g/CAGL0B02079g/CAGL0H06039g/CAGL0L10912g	27
2	GO:0045944	positive regulation of transcription by RNA polymerase II	21/217	232/5293	0.0005	0.1173	0.1131	CAGL0B04895g/CAGL0E03762g/CAGL0E04312g/CAGL0E04884g/CAGL0E06116g/CAGL0H03751g/CAGL0J01529g/CAGL0L01771g/CAGL0L02453g/CAGL0E05566g/CAGL0F09075g/CAGL0G08646g/CAGL0H00396g/CAGL0H02145g/CAGL0H08107g/CAGL0M08800g/CAGL0J03960g/CAGL0F01837g/CAGL0A01628g/CAGL0D05478g/CAGL0C00759g	21
3	GO:0045893	positive regulation of transcription, DNA-templated	22/217	257/5293	0.0007	0.1173	0.1131	CAGL0B04895g/CAGL0E03762g/CAGL0E04312g/CAGL0E04884g/CAGL0E06116g/CAGL0F08151g/CAGL0H03751g/CAGL0J01529g/CAGL0L01771g/CAGL0L02453g/CAGL0E05566g/CAGL0F09075g/CAGL0G08646g/CAGL0H00396g/CAGL0H02145g/CAGL0H08107g/CAGL0M08800g/CAGL0J03960g/CAGL0F01837g/CAGL0A01628g/CAGL0D05478g/CAGL0C00759g	22
4	GO:0006357	regulation of transcription by RNA polymerase II	27/217	356/5293	0.0012	0.1173	0.1131	CAGL0B04895g/CAGL0D05368g/CAGL0E03762g/CAGL0E04312g/CAGL0E04884g/CAGL0E06116g/CAGL0G02739g/CAGL0H03751g/CAGL0H06677g/CAGL0J01529g/CAGL0K03003g/CAGL0L01771g/CAGL0L02453g/CAGL0E05566g/CAGL0F09075g/CAGL0G08646g/CAGL0H00396g/CAGL0H02145g/CAGL0H08107g/CAGL0I04180g/CAGL0I08195g/CAGL0M08800g/CAGL0J03960g/CAGL0F01837g/CAGL0A01628g/CAGL0D05478g/CAGL0C00759g	27
5	GO:0006355	regulation of transcription, DNA-templated	33/217	468/5293	0.0012	0.1173	0.1131	CAGL0B04895g/CAGL0D05368g/CAGL0E03762g/CAGL0E04312g/CAGL0E04884g/CAGL0E06116g/CAGL0F01265g/CAGL0F04081g/CAGL0F08151g/CAGL0G02739g/CAGL0H02959g/CAGL0H03751g/CAGL0H06677g/CAGL0I00902g/CAGL0I04246g/CAGL0J01529g/CAGL0K03003g/CAGL0L01771g/CAGL0L02453g/CAGL0E05566g/CAGL0F09075g/CAGL0G08646g/CAGL0H00396g/CAGL0H02145g/CAGL0H08107g/CAGL0I04180g/CAGL0I08195g/CAGL0M08800g/CAGL0J03960g/CAGL0F01837g/CAGL0A016…	33
6	GO:2000222	positive regulation of pseudohyphal growth	5/217	21/5293	0.0013	0.1173	0.1131	CAGL0K09350g/CAGL0L01771g/CAGL0L02453g/CAGL0H02145g/CAGL0H08107g	5
7	GO:1900430	positive regulation of filamentous growth of a population of unicellular organisms	9/217	69/5293	0.0018	0.1332	0.1285	CAGL0E03762g/CAGL0E04312g/CAGL0K09350g/CAGL0L01771g/CAGL0L02453g/CAGL0F09075g/CAGL0H02145g/CAGL0H08107g/CAGL0A01628g	9
8	GO:0044114	development of symbiont in host	4/217	14/5293	0.002	0.1332	0.1285	CAGL0K03003g/CAGL0A04829g/CAGL0F09075g/CAGL0H02145g	4
9	GO:0005975	carbohydrate metabolic process	18/217	215/5293	0.0029	0.1719	0.1657	CAGL0E01529g/CAGL0G04873g/CAGL0H09130g/CAGL0I07249g/CAGL0L01727g/CAGL0A04829g/CAGL0C05137g/CAGL0E05566g/CAGL0F04917g/CAGL0F09075g/CAGL0G01034g/CAGL0H02145g/CAGL0H06633g/CAGL0I05698g/CAGL0I08195g/CAGL0I10054g/CAGL0J02904g/CAGL0M06963g	18
10	GO:0046688	response to copper ion	4/217	17/5293	0.0043	0.2091	0.2016	CAGL0D01265g/CAGL0E03762g/CAGL0H08107g/CAGL0I04180g	4
11	GO:1900437	regulation of filamentous growth of a population of unicellular organisms in response to chemical stimulus	4/217	17/5293	0.0043	0.2091	0.2016	CAGL0E03762g/CAGL0E04312g/CAGL0F09075g/CAGL0H08107g	4
12	GO:0070786	positive regulation of growth of unicellular organism as a thread of attached cells	5/217	29/5293	0.0059	0.2608	0.2515	CAGL0K09350g/CAGL0L01771g/CAGL0L02453g/CAGL0H02145g/CAGL0H08107g	5
13	GO:0006075	(1->3)-beta-D-glucan biosynthetic process	3/217	10/5293	0.0066	0.2608	0.2515	CAGL0G04873g/CAGL0I07249g/CAGL0G01034g	3
14	GO:0006090	pyruvate metabolic process	5/217	30/5293	0.0068	0.2608	0.2515	CAGL0E01529g/CAGL0M07920g/CAGL0A04829g/CAGL0E05566g/CAGL0I05698g	5
15	GO:0016052	carbohydrate catabolic process	7/217	56/5293	0.0074	0.2647	0.2552	CAGL0E01529g/CAGL0L01727g/CAGL0A04829g/CAGL0E05566g/CAGL0F09075g/CAGL0I05698g/CAGL0I08195g	7
16	GO:0001678	cellular glucose homeostasis	4/217	21/5293	0.0095	0.3096	0.2986	CAGL0A04829g/CAGL0F09075g/CAGL0I03872g/CAGL0I08195g	4
17	GO:0006096	glycolytic process	4/217	22/5293	0.0112	0.3096	0.2986	CAGL0E01529g/CAGL0A04829g/CAGL0E05566g/CAGL0I05698g	4
18	GO:0006536	glutamate metabolic process	3/217	12/5293	0.0114	0.3096	0.2986	CAGL0D00176g/CAGL0D04026g/CAGL0K05357g	3
19	GO:0044262	cellular carbohydrate metabolic process	11/217	125/5293	0.013	0.3096	0.2986	CAGL0G04873g/CAGL0H09130g/CAGL0I07249g/CAGL0A04829g/CAGL0C05137g/CAGL0F04917g/CAGL0F09075g/CAGL0G01034g/CAGL0I08195g/CAGL0I10054g/CAGL0J02904g	11
20	GO:0035023	regulation of Rho protein signal transduction	3/217	13/5293	0.0143	0.3096	0.2986	CAGL0G04873g/CAGL0I07249g/CAGL0B04851g	3
21	GO:0061587	transfer RNA gene-mediated silencing	3/217	13/5293	0.0143	0.3096	0.2986	CAGL0I05060g/CAGL0J01529g/CAGL0L10934g	3
22	GO:1900439	positive regulation of filamentous growth of a population of unicellular organisms in response to chemical stimulus	3/217	13/5293	0.0143	0.3096	0.2986	CAGL0E03762g/CAGL0E04312g/CAGL0H08107g	3
23	GO:2000220	regulation of pseudohyphal growth	5/217	36/5293	0.0148	0.3096	0.2986	CAGL0K09350g/CAGL0L01771g/CAGL0L02453g/CAGL0H02145g/CAGL0H08107g	5
24	GO:0006165	nucleoside diphosphate phosphorylation	4/217	24/5293	0.0153	0.3096	0.2986	CAGL0E01529g/CAGL0A04829g/CAGL0E05566g/CAGL0I05698g	4
25	GO:0006366	transcription by RNA polymerase II	27/217	429/5293	0.0156	0.3096	0.2986	CAGL0B04895g/CAGL0D05368g/CAGL0E03762g/CAGL0E04312g/CAGL0E04884g/CAGL0E06116g/CAGL0G02739g/CAGL0H03751g/CAGL0H06677g/CAGL0J01529g/CAGL0K03003g/CAGL0L01771g/CAGL0L02453g/CAGL0E05566g/CAGL0F09075g/CAGL0G08646g/CAGL0H00396g/CAGL0H02145g/CAGL0H08107g/CAGL0I04180g/CAGL0I08195g/CAGL0M08800g/CAGL0J03960g/CAGL0F01837g/CAGL0A01628g/CAGL0D05478g/CAGL0C00759g	27
26	GO:0000271	polysaccharide biosynthetic process	6/217	50/5293	0.0156	0.3096	0.2986	CAGL0G04873g/CAGL0H09130g/CAGL0I07249g/CAGL0F04917g/CAGL0G01034g/CAGL0I10054g	6
27	GO:0001558	regulation of cell growth	6/217	50/5293	0.0156	0.3096	0.2986	CAGL0G04873g/CAGL0K09350g/CAGL0L01771g/CAGL0L02453g/CAGL0H02145g/CAGL0H08107g	6
28	GO:0000122	negative regulation of transcription by RNA polymerase II	10/217	113/5293	0.0169	0.3236	0.312	CAGL0B04895g/CAGL0E03762g/CAGL0G02739g/CAGL0K03003g/CAGL0H00396g/CAGL0I08195g/CAGL0M08800g/CAGL0J03960g/CAGL0F01837g/CAGL0A01628g	10
29	GO:0010255	glucose mediated signaling pathway	3/217	14/5293	0.0177	0.3271	0.3154	CAGL0F09075g/CAGL0I03872g/CAGL0I08195g	3
30	GO:0044419	interspecies interaction between organisms	7/217	67/5293	0.019	0.3401	0.3279	CAGL0E03762g/CAGL0K03003g/CAGL0L02453g/CAGL0A04829g/CAGL0F09075g/CAGL0H02145g/CAGL0H08107g	7
31	GO:0071280	cellular response to copper ion	3/217	15/5293	0.0215	0.3711	0.3579	CAGL0D01265g/CAGL0E03762g/CAGL0H08107g	3
32	GO:0046939	nucleotide phosphorylation	4/217	27/5293	0.023	0.385	0.3712	CAGL0E01529g/CAGL0A04829g/CAGL0E05566g/CAGL0I05698g	4
33	GO:0031048	chromatin silencing by small RNA	3/217	16/5293	0.0256	0.4041	0.3897	CAGL0I05060g/CAGL0J01529g/CAGL0L10934g	3
34	GO:1900461	positive regulation of pseudohyphal growth by positive regulation of transcription from RNA polymerase II promoter	3/217	16/5293	0.0256	0.4041	0.3897	CAGL0L02453g/CAGL0H02145g/CAGL0H08107g	3
35	GO:0007266	Rho protein signal transduction	3/217	17/5293	0.0302	0.4498	0.4337	CAGL0G04873g/CAGL0I07249g/CAGL0B04851g	3
36	GO:0071333	cellular response to glucose stimulus	3/217	17/5293	0.0302	0.4498	0.4337	CAGL0F09075g/CAGL0I03872g/CAGL0I08195g	3
37	GO:1900428	regulation of filamentous growth of a population of unicellular organisms	10/217	127/5293	0.0348	0.4746	0.4577	CAGL0E03762g/CAGL0E04312g/CAGL0K09350g/CAGL0L01771g/CAGL0L02453g/CAGL0E05566g/CAGL0F09075g/CAGL0H02145g/CAGL0H08107g/CAGL0A01628g	10
38	GO:0009749	response to glucose	3/217	18/5293	0.0352	0.4746	0.4577	CAGL0F09075g/CAGL0I03872g/CAGL0I08195g	3
39	GO:0071322	cellular response to carbohydrate stimulus	3/217	18/5293	0.0352	0.4746	0.4577	CAGL0F09075g/CAGL0I03872g/CAGL0I08195g	3
40	GO:0006109	regulation of carbohydrate metabolic process	5/217	45/5293	0.0356	0.4746	0.4577	CAGL0E01529g/CAGL0G04873g/CAGL0I07249g/CAGL0E05566g/CAGL0F04917g	5
41	GO:0036171	filamentous growth of a population of unicellular organisms in response to chemical stimulus	4/217	31/5293	0.0363	0.4746	0.4577	CAGL0E03762g/CAGL0E04312g/CAGL0F09075g/CAGL0H08107g	4
42	GO:0006665	sphingolipid metabolic process	5/217	47/5293	0.0419	0.5351	0.516	CAGL0F09075g/CAGL0I10054g/CAGL0K08272g/CAGL0L10142g/CAGL0K02739g	5
43	GO:0030148	sphingolipid biosynthetic process	4/217	33/5293	0.0443	0.5416	0.5222	CAGL0F09075g/CAGL0I10054g/CAGL0K08272g/CAGL0K02739g	4
44	GO:0045892	negative regulation of transcription, DNA-templated	11/217	151/5293	0.0448	0.5416	0.5222	CAGL0B04895g/CAGL0E03762g/CAGL0G02739g/CAGL0J01529g/CAGL0K03003g/CAGL0H00396g/CAGL0I08195g/CAGL0M08800g/CAGL0J03960g/CAGL0F01837g/CAGL0A01628g	11
45	GO:0010570	regulation of filamentous growth	10/217	133/5293	0.0455	0.5416	0.5222	CAGL0E03762g/CAGL0E04312g/CAGL0K09350g/CAGL0L01771g/CAGL0L02453g/CAGL0E05566g/CAGL0F09075g/CAGL0H02145g/CAGL0H08107g/CAGL0A01628g	10
46	GO:0000429	carbon catabolite regulation of transcription from RNA polymerase II promoter	4/217	35/5293	0.0533	0.6208	0.5986	CAGL0E04884g/CAGL0H06677g/CAGL0I08195g/CAGL0A01628g	4
47	GO:0044182	filamentous growth of a population of unicellular organisms	21/217	356/5293	0.0565	0.6409	0.618	CAGL0D00176g/CAGL0E03762g/CAGL0E04312g/CAGL0E04884g/CAGL0F00407g/CAGL0K09350g/CAGL0L01771g/CAGL0L02453g/CAGL0L06666g/CAGL0M12012g/CAGL0A04829g/CAGL0E05566g/CAGL0F09075g/CAGL0G03487g/CAGL0G09735g/CAGL0H02145g/CAGL0H08107g/CAGL0J07502g/CAGL0A01628g/CAGL0K02739g/CAGL0D05478g	21
48	GO:0008360	regulation of cell shape	4/217	36/5293	0.0581	0.6409	0.618	CAGL0G04873g/CAGL0I07249g/CAGL0G09735g/CAGL0G04895g	4
49	GO:0044010	single-species biofilm formation	7/217	85/5293	0.0586	0.6409	0.618	CAGL0E03674g/CAGL0F00407g/CAGL0K03003g/CAGL0L02453g/CAGL0E05566g/CAGL0H00396g/CAGL0H02145g	7
50	GO:0006359	regulation of transcription by RNA polymerase III	2/217	10/5293	0.0606	0.6497	0.6265	CAGL0F08151g/CAGL0F09075g	2
51	GO:0031670	cellular response to nutrient	5/217	53/5293	0.0646	0.6524	0.6291	CAGL0E04884g/CAGL0H06677g/CAGL0E05566g/CAGL0I08195g/CAGL0A01628g	5
52	GO:0031047	gene silencing by RNA	3/217	23/5293	0.0658	0.6524	0.6291	CAGL0I05060g/CAGL0J01529g/CAGL0L10934g	3
53	GO:1900436	positive regulation of filamentous growth of a population of unicellular organisms in response to starvation	3/217	23/5293	0.0658	0.6524	0.6291	CAGL0F09075g/CAGL0H02145g/CAGL0A01628g	3
54	GO:0022604	regulation of cell morphogenesis	4/217	38/5293	0.0684	0.6524	0.6291	CAGL0G04873g/CAGL0I07249g/CAGL0G09735g/CAGL0G04895g	4
55	GO:0007584	response to nutrient	5/217	54/5293	0.0689	0.6524	0.6291	CAGL0E04884g/CAGL0H06677g/CAGL0E05566g/CAGL0I08195g/CAGL0A01628g	5
56	GO:0006521	regulation of cellular amino acid metabolic process	2/217	11/5293	0.0721	0.6524	0.6291	CAGL0H00396g/CAGL0I08195g	2
57	GO:0008645	hexose transmembrane transport	2/217	11/5293	0.0721	0.6524	0.6291	CAGL0A01826g/CAGL0A04829g	2
58	GO:0045807	positive regulation of endocytosis	2/217	11/5293	0.0721	0.6524	0.6291	CAGL0G04873g/CAGL0G01034g	2
59	GO:0051156	glucose 6-phosphate metabolic process	2/217	11/5293	0.0721	0.6524	0.6291	CAGL0A04829g/CAGL0M06963g	2
60	GO:1900434	regulation of filamentous growth of a population of unicellular organisms in response to starvation	3/217	24/5293	0.073	0.6524	0.6291	CAGL0F09075g/CAGL0H02145g/CAGL0A01628g	3
61	GO:0042180	cellular ketone metabolic process	4/217	40/5293	0.0796	0.695	0.6701	CAGL0F08239g/CAGL0H00396g/CAGL0I08195g/CAGL0B02079g	4
62	GO:1903338	regulation of cell wall organization or biogenesis	3/217	25/5293	0.0806	0.695	0.6701	CAGL0G04873g/CAGL0I07249g/CAGL0G09273g	3
63	GO:0000433	carbon catabolite repression of transcription from RNA polymerase II promoter by glucose	2/217	12/5293	0.0843	0.695	0.6701	CAGL0I08195g/CAGL0A01628g	2
64	GO:0042908	xenobiotic transport	2/217	12/5293	0.0843	0.695	0.6701	CAGL0G08624g/CAGL0H06039g	2
65	GO:0051278	fungal-type cell wall polysaccharide biosynthetic process	2/217	12/5293	0.0843	0.695	0.6701	CAGL0H09130g/CAGL0G01034g	2
66	GO:0044011	single-species biofilm formation on inanimate substrate	6/217	76/5293	0.0902	0.7219	0.6961	CAGL0F00407g/CAGL0K03003g/CAGL0L02453g/CAGL0E05566g/CAGL0H00396g/CAGL0H02145g	6
67	GO:0046034	ATP metabolic process	4/217	42/5293	0.0916	0.7219	0.6961	CAGL0E01529g/CAGL0A04829g/CAGL0E05566g/CAGL0I05698g	4
68	GO:0051056	regulation of small GTPase mediated signal transduction	4/217	42/5293	0.0916	0.7219	0.6961	CAGL0G04873g/CAGL0I07249g/CAGL0B04851g/CAGL0D06512g	4
69	GO:0015718	monocarboxylic acid transport	2/217	13/5293	0.097	0.7535	0.7265	CAGL0I02178g/CAGL0C03289g	2
70	GO:0007124	pseudohyphal growth	6/217	78/5293	0.0993	0.7573	0.7303	CAGL0K09350g/CAGL0L01771g/CAGL0L02453g/CAGL0G03487g/CAGL0H02145g/CAGL0H08107g	6
71	GO:1900231	regulation of single-species biofilm formation on inanimate substrate	3/217	28/5293	0.1051	0.7573	0.7303	CAGL0L02453g/CAGL0E05566g/CAGL0H02145g	3
72	GO:0071852	fungal-type cell wall organization or biogenesis	14/217	237/5293	0.1061	0.7573	0.7303	CAGL0E03762g/CAGL0G04873g/CAGL0H09130g/CAGL0K03003g/CAGL0K10164g/CAGL0L01727g/CAGL0F07601g/CAGL0G01034g/CAGL0G08624g/CAGL0H02145g/CAGL0I06182g/CAGL0I10054g/CAGL0L07502g/CAGL0G09273g	14
73	GO:0000430	regulation of transcription from RNA polymerase II promoter by glucose	2/217	14/5293	0.1102	0.7573	0.7303	CAGL0I08195g/CAGL0A01628g	2
74	GO:0006878	cellular copper ion homeostasis	2/217	14/5293	0.1102	0.7573	0.7303	CAGL0G03487g/CAGL0I04180g	2
75	GO:0009313	oligosaccharide catabolic process	2/217	14/5293	0.1102	0.7573	0.7303	CAGL0F09075g/CAGL0I08195g	2
76	GO:0031138	negative regulation of conjugation with cellular fusion	2/217	14/5293	0.1102	0.7573	0.7303	CAGL0F09075g/CAGL0I08195g	2
77	GO:0045014	carbon catabolite repression of transcription by glucose	2/217	14/5293	0.1102	0.7573	0.7303	CAGL0I08195g/CAGL0A01628g	2
78	GO:1900189	positive regulation of cell adhesion involved in single-species biofilm formation	2/217	14/5293	0.1102	0.7573	0.7303	CAGL0K03003g/CAGL0H00396g	2
79	GO:1900190	regulation of single-species biofilm formation	3/217	29/5293	0.1139	0.7727	0.7451	CAGL0L02453g/CAGL0E05566g/CAGL0H02145g	3
80	GO:0010811	positive regulation of cell-substrate adhesion	2/217	15/5293	0.1239	0.7999	0.7713	CAGL0K03003g/CAGL0H00396g	2
81	GO:0043547	positive regulation of GTPase activity	2/217	15/5293	0.1239	0.7999	0.7713	CAGL0G04873g/CAGL0I07249g	2
82	GO:0045332	phospholipid translocation	2/217	15/5293	0.1239	0.7999	0.7713	CAGL0L10142g/CAGL0G09273g	2
83	GO:0046173	polyol biosynthetic process	2/217	15/5293	0.1239	0.7999	0.7713	CAGL0C05137g/CAGL0B02079g	2
84	GO:0030436	asexual sporulation	5/217	65/5293	0.1265	0.8073	0.7785	CAGL0E01353g/CAGL0E03762g/CAGL0C02937g/CAGL0F09075g/CAGL0I08195g	5
85	GO:0030447	filamentous growth	25/217	482/5293	0.1282	0.8083	0.7794	CAGL0D00176g/CAGL0E03762g/CAGL0E04312g/CAGL0E04884g/CAGL0F00407g/CAGL0H02959g/CAGL0K03003g/CAGL0K09350g/CAGL0L01771g/CAGL0L02453g/CAGL0L06666g/CAGL0M12012g/CAGL0A04829g/CAGL0C05467g/CAGL0E05566g/CAGL0F09075g/CAGL0G03487g/CAGL0G09735g/CAGL0H00396g/CAGL0H02145g/CAGL0H08107g/CAGL0J07502g/CAGL0A01628g/CAGL0K02739g/CAGL0D05478g	25
86	GO:0071469	cellular response to alkaline pH	2/217	16/5293	0.1379	0.8595	0.8287	CAGL0E03762g/CAGL0E04312g	2
87	GO:0009141	nucleoside triphosphate metabolic process	4/217	50/5293	0.1474	0.8871	0.8553	CAGL0E01529g/CAGL0A04829g/CAGL0E05566g/CAGL0I05698g	4
88	GO:0000902	cell morphogenesis	5/217	69/5293	0.1517	0.8871	0.8553	CAGL0G04873g/CAGL0I07249g/CAGL0G09735g/CAGL0G04895g/CAGL0K02739g	5
89	GO:0001410	chlamydospore formation	2/217	17/5293	0.1523	0.8871	0.8553	CAGL0E03762g/CAGL0F09075g	2
90	GO:0015976	carbon utilization	2/217	17/5293	0.1523	0.8871	0.8553	CAGL0H06633g/CAGL0A01628g	2
91	GO:0046015	regulation of transcription by glucose	2/217	17/5293	0.1523	0.8871	0.8553	CAGL0I08195g/CAGL0A01628g	2
92	GO:1900239	regulation of phenotypic switching	2/217	17/5293	0.1523	0.8871	0.8553	CAGL0L02453g/CAGL0A04829g	2
93	GO:0046578	regulation of Ras protein signal transduction	3/217	34/5293	0.1614	0.9128	0.8802	CAGL0G04873g/CAGL0I07249g/CAGL0B04851g	3
94	GO:0009405	pathogenesis	10/217	171/5293	0.1629	0.9128	0.8802	CAGL0E03674g/CAGL0E03762g/CAGL0K03003g/CAGL0L06666g/CAGL0A04829g/CAGL0C05467g/CAGL0E05566g/CAGL0F09075g/CAGL0G09735g/CAGL0H02145g	10
95	GO:0036267	invasive filamentous growth	4/217	52/5293	0.163	0.9128	0.8802	CAGL0D00176g/CAGL0K09350g/CAGL0G03487g/CAGL0H02145g	4
96	GO:0005991	trehalose metabolic process	2/217	18/5293	0.1669	0.9128	0.8802	CAGL0F09075g/CAGL0I08195g	2
97	GO:0030100	regulation of endocytosis	2/217	18/5293	0.1669	0.9128	0.8802	CAGL0G04873g/CAGL0G01034g	2
98	GO:0060237	regulation of fungal-type cell wall organization	2/217	18/5293	0.1669	0.9128	0.8802	CAGL0G04873g/CAGL0G09273g	2
99	GO:0001302	replicative cell aging	3/217	36/5293	0.1818	0.9845	0.9493	CAGL0K09350g/CAGL0F09075g/CAGL0K02739g	3
100	GO:0007264	small GTPase mediated signal transduction	6/217	94/5293	0.1872	1	0.9643	CAGL0E06292g/CAGL0G04873g/CAGL0I07249g/CAGL0B04851g/CAGL0D06512g/CAGL0J00715g	6
101	GO:0044403	symbiont process	4/217	56/5293	0.1959	1	0.9643	CAGL0E03762g/CAGL0L02453g/CAGL0A04829g/CAGL0H08107g	4
102	GO:0007186	G protein-coupled receptor signaling pathway	2/217	20/5293	0.1968	1	0.9643	CAGL0F09075g/CAGL0I08195g	2
103	GO:0070787	conidiophore development	2/217	20/5293	0.1968	1	0.9643	CAGL0F09075g/CAGL0H00396g	2
104	GO:0042546	cell wall biogenesis	7/217	117/5293	0.2032	1	0.9643	CAGL0E03762g/CAGL0G04873g/CAGL0H09130g/CAGL0I07249g/CAGL0L01727g/CAGL0G01034g/CAGL0G08624g	7
105	GO:0009272	fungal-type cell wall biogenesis	6/217	97/5293	0.2063	1	0.9643	CAGL0E03762g/CAGL0G04873g/CAGL0H09130g/CAGL0L01727g/CAGL0G01034g/CAGL0G08624g	6
106	GO:0016226	iron-sulfur cluster assembly	2/217	21/5293	0.212	1	0.9643	CAGL0G03905g/CAGL0J04048g	2
107	GO:0034314	Arp2/3 complex-mediated actin nucleation	2/217	21/5293	0.212	1	0.9643	CAGL0G09735g/CAGL0G04895g	2
108	GO:0055088	lipid homeostasis	2/217	21/5293	0.212	1	0.9643	CAGL0G08624g/CAGL0J01111g	2
109	GO:0006865	amino acid transport	3/217	39/5293	0.2137	1	0.9643	CAGL0B01012g/CAGL0E04312g/CAGL0H08393g	3
110	GO:0070783	growth of unicellular organism as a thread of attached cells	7/217	120/5293	0.221	1	0.9643	CAGL0D00176g/CAGL0K09350g/CAGL0L01771g/CAGL0L02453g/CAGL0G03487g/CAGL0H02145g/CAGL0H08107g	7
111	GO:0009847	spore germination	2/217	22/5293	0.2273	1	0.9643	CAGL0F09075g/CAGL0I08195g	2
112	GO:0030041	actin filament polymerization	2/217	22/5293	0.2273	1	0.9643	CAGL0G09735g/CAGL0G04895g	2
113	GO:0044550	secondary metabolite biosynthetic process	2/217	22/5293	0.2273	1	0.9643	CAGL0L06666g/CAGL0B02079g	2
114	GO:0010038	response to metal ion	4/217	60/5293	0.2307	1	0.9643	CAGL0D01265g/CAGL0E03762g/CAGL0H08107g/CAGL0I04180g	4
115	GO:0043087	regulation of GTPase activity	2/217	23/5293	0.2427	1	0.9643	CAGL0G04873g/CAGL0I07249g	2
116	GO:0043709	cell adhesion involved in single-species biofilm formation	2/217	23/5293	0.2427	1	0.9643	CAGL0K03003g/CAGL0H00396g	2
117	GO:0043936	asexual sporulation resulting in formation of a cellular spore	2/217	23/5293	0.2427	1	0.9643	CAGL0E03762g/CAGL0F09075g	2
118	GO:0031669	cellular response to nutrient levels	12/217	234/5293	0.2512	1	0.9643	CAGL0E03762g/CAGL0E04884g/CAGL0H06677g/CAGL0K09350g/CAGL0E05566g/CAGL0F09075g/CAGL0G09735g/CAGL0H02145g/CAGL0I08195g/CAGL0J07502g/CAGL0A01628g/CAGL0D05478g	12
119	GO:0045991	carbon catabolite activation of transcription	2/217	24/5293	0.2581	1	0.9643	CAGL0E04884g/CAGL0E05566g	2
120	GO:0051666	actin cortical patch localization	2/217	24/5293	0.2581	1	0.9643	CAGL0G04873g/CAGL0G04895g	2
121	GO:0031505	fungal-type cell wall organization	10/217	192/5293	0.2619	1	0.9643	CAGL0G04873g/CAGL0K03003g/CAGL0K10164g/CAGL0F07601g/CAGL0G08624g/CAGL0H02145g/CAGL0I06182g/CAGL0I10054g/CAGL0L07502g/CAGL0G09273g	10
122	GO:0007155	cell adhesion	4/217	64/5293	0.2669	1	0.9643	CAGL0K03003g/CAGL0L02453g/CAGL0H00396g/CAGL0L13299g	4
123	GO:0001403	invasive growth in response to glucose limitation	3/217	44/5293	0.269	1	0.9643	CAGL0K09350g/CAGL0G03487g/CAGL0H02145g	3
124	GO:0019740	nitrogen utilization	2/217	25/5293	0.2735	1	0.9643	CAGL0D00176g/CAGL0K05357g	2
125	GO:0045010	actin nucleation	2/217	25/5293	0.2735	1	0.9643	CAGL0G09735g/CAGL0G04895g	2
126	GO:0071555	cell wall organization	10/217	196/5293	0.2828	1	0.9643	CAGL0G04873g/CAGL0K03003g/CAGL0K10164g/CAGL0F07601g/CAGL0G08624g/CAGL0H02145g/CAGL0I06182g/CAGL0I10054g/CAGL0L07502g/CAGL0G09273g	10
127	GO:0009311	oligosaccharide metabolic process	2/217	26/5293	0.289	1	0.9643	CAGL0F09075g/CAGL0I08195g	2
128	GO:0015914	phospholipid transport	2/217	26/5293	0.289	1	0.9643	CAGL0L10142g/CAGL0G09273g	2
129	GO:0016575	histone deacetylation	2/217	26/5293	0.289	1	0.9643	CAGL0G02739g/CAGL0J01529g	2
130	GO:0043708	cell adhesion involved in biofilm formation	2/217	26/5293	0.289	1	0.9643	CAGL0K03003g/CAGL0H00396g	2
131	GO:1900445	positive regulation of filamentous growth of a population of unicellular organisms in response to biotic stimulus	2/217	26/5293	0.289	1	0.9643	CAGL0H02145g/CAGL0H08107g	2
132	GO:0048315	conidium formation	3/217	46/5293	0.2916	1	0.9643	CAGL0E01353g/CAGL0C02937g/CAGL0I08195g	3
133	GO:0000022	mitotic spindle elongation	2/217	27/5293	0.3044	1	0.9643	CAGL0D04642g/CAGL0I10318g	2
134	GO:0000079	regulation of cyclin-dependent protein serine/threonine kinase activity	2/217	27/5293	0.3044	1	0.9643	CAGL0J09328g/CAGL0D04642g	2
135	GO:0006476	protein deacetylation	2/217	27/5293	0.3044	1	0.9643	CAGL0G02739g/CAGL0J01529g	2
136	GO:0044406	adhesion of symbiont to host	2/217	27/5293	0.3044	1	0.9643	CAGL0L02453g/CAGL0A04829g	2
137	GO:0051646	mitochondrion localization	2/217	27/5293	0.3044	1	0.9643	CAGL0D05544g/CAGL0G04895g	2
138	GO:0071248	cellular response to metal ion	3/217	48/5293	0.3143	1	0.9643	CAGL0D01265g/CAGL0E03762g/CAGL0H08107g	3
139	GO:0006066	alcohol metabolic process	5/217	91/5293	0.3171	1	0.9643	CAGL0E04884g/CAGL0K03003g/CAGL0M07920g/CAGL0C05137g/CAGL0B02079g	5
140	GO:0031507	heterochromatin assembly	5/217	91/5293	0.3171	1	0.9643	CAGL0I05060g/CAGL0J01529g/CAGL0L10934g/CAGL0G00902g/CAGL0J03960g	5
141	GO:0035601	protein deacylation	2/217	28/5293	0.3197	1	0.9643	CAGL0G02739g/CAGL0J01529g	2
142	GO:0008652	cellular amino acid biosynthetic process	5/217	93/5293	0.3334	1	0.9643	CAGL0D00176g/CAGL0D04576g/CAGL0H00396g/CAGL0I08987g/CAGL0K05357g	5
143	GO:0007265	Ras protein signal transduction	3/217	50/5293	0.3371	1	0.9643	CAGL0G04873g/CAGL0I07249g/CAGL0B04851g	3
144	GO:0036178	filamentous growth of a population of unicellular organisms in response to neutral pH	3/217	50/5293	0.3371	1	0.9643	CAGL0E03762g/CAGL0F00407g/CAGL0H08107g	3
145	GO:0006520	cellular amino acid metabolic process	9/217	184/5293	0.3414	1	0.9643	CAGL0D00176g/CAGL0D04026g/CAGL0M07920g/CAGL0D04576g/CAGL0H00396g/CAGL0I08195g/CAGL0I08987g/CAGL0J04554g/CAGL0K05357g	9
146	GO:0000755	cytogamy	1/217	10/5293	0.3423	1	0.9643	CAGL0D04686g	1
147	GO:0000916	actomyosin contractile ring contraction	1/217	10/5293	0.3423	1	0.9643	CAGL0G09735g	1
148	GO:0006098	pentose-phosphate shunt	1/217	10/5293	0.3423	1	0.9643	CAGL0M06963g	1
149	GO:0006384	transcription initiation from RNA polymerase III promoter	1/217	10/5293	0.3423	1	0.9643	CAGL0F08151g	1
150	GO:0006526	arginine biosynthetic process	1/217	10/5293	0.3423	1	0.9643	CAGL0I08987g	1
151	GO:0010973	positive regulation of division septum assembly	1/217	10/5293	0.3423	1	0.9643	CAGL0E03762g	1
152	GO:0034755	iron ion transmembrane transport	1/217	10/5293	0.3423	1	0.9643	CAGL0D04708g	1
153	GO:0045461	sterigmatocystin biosynthetic process	1/217	10/5293	0.3423	1	0.9643	CAGL0L06666g	1
154	GO:0046083	adenine metabolic process	1/217	10/5293	0.3423	1	0.9643	CAGL0J10494g	1
155	GO:0070879	fungal-type cell wall beta-glucan metabolic process	1/217	10/5293	0.3423	1	0.9643	CAGL0G01034g	1
156	GO:0071456	cellular response to hypoxia	1/217	10/5293	0.3423	1	0.9643	CAGL0E05566g	1
157	GO:0071474	cellular hyperosmotic response	1/217	10/5293	0.3423	1	0.9643	CAGL0K03003g	1
158	GO:0075306	regulation of conidium formation	1/217	10/5293	0.3423	1	0.9643	CAGL0I08195g	1
159	GO:0090153	regulation of sphingolipid biosynthetic process	1/217	10/5293	0.3423	1	0.9643	CAGL0F09075g	1
160	GO:0097428	protein maturation by iron-sulfur cluster transfer	1/217	10/5293	0.3423	1	0.9643	CAGL0G03905g	1
161	GO:0006897	endocytosis	5/217	95/5293	0.3499	1	0.9643	CAGL0G04873g/CAGL0G01034g/CAGL0G09735g/CAGL0G04895g/CAGL0I02156g	5
162	GO:0000917	division septum assembly	2/217	30/5293	0.3501	1	0.9643	CAGL0E03762g/CAGL0G01034g	2
163	GO:0031106	septin ring organization	2/217	30/5293	0.3501	1	0.9643	CAGL0J09328g/CAGL0I10318g	2
164	GO:0071963	establishment or maintenance of cell polarity regulating cell shape	2/217	30/5293	0.3501	1	0.9643	CAGL0G09735g/CAGL0G04895g	2
165	GO:0006811	ion transport	9/217	187/5293	0.359	1	0.9643	CAGL0E01353g/CAGL0I02178g/CAGL0C03289g/CAGL0D04708g/CAGL0H10076g/CAGL0J01870g/CAGL0K02761g/CAGL0L10142g/CAGL0L10912g	9
166	GO:0017004	cytochrome complex assembly	2/217	31/5293	0.3651	1	0.9643	CAGL0M12012g/CAGL0G09262g	2
167	GO:0005979	regulation of glycogen biosynthetic process	1/217	11/5293	0.3693	1	0.9643	CAGL0F04917g	1
168	GO:0006077	(1->6)-beta-D-glucan metabolic process	1/217	11/5293	0.3693	1	0.9643	CAGL0I10054g	1
169	GO:0006078	(1->6)-beta-D-glucan biosynthetic process	1/217	11/5293	0.3693	1	0.9643	CAGL0I10054g	1
170	GO:0006607	NLS-bearing protein import into nucleus	1/217	11/5293	0.3693	1	0.9643	CAGL0G00902g	1
171	GO:0006734	NADH metabolic process	1/217	11/5293	0.3693	1	0.9643	CAGL0C05137g	1
172	GO:0010514	induction of conjugation with cellular fusion	1/217	11/5293	0.3693	1	0.9643	CAGL0I08195g	1
173	GO:0015851	nucleobase transport	1/217	11/5293	0.3693	1	0.9643	CAGL0J02948g	1
174	GO:0031167	rRNA methylation	1/217	11/5293	0.3693	1	0.9643	CAGL0M06941g	1
175	GO:0031990	mRNA export from nucleus in response to heat stress	1/217	11/5293	0.3693	1	0.9643	CAGL0G00902g	1
176	GO:0044117	growth of symbiont in host	1/217	11/5293	0.3693	1	0.9643	CAGL0A04829g	1
177	GO:0051037	regulation of transcription involved in meiotic cell cycle	1/217	11/5293	0.3693	1	0.9643	CAGL0J03960g	1
178	GO:0051099	positive regulation of binding	1/217	11/5293	0.3693	1	0.9643	CAGL0C02937g	1
179	GO:0090054	regulation of chromatin silencing at silent mating-type cassette	1/217	11/5293	0.3693	1	0.9643	CAGL0J03960g	1
180	GO:1900233	positive regulation of single-species biofilm formation on inanimate substrate	1/217	11/5293	0.3693	1	0.9643	CAGL0E05566g	1
181	GO:1990414	replication-born double-strand break repair via sister chromatid exchange	1/217	11/5293	0.3693	1	0.9643	CAGL0K06127g	1
182	GO:0019220	regulation of phosphate metabolic process	6/217	120/5293	0.3694	1	0.9643	CAGL0E01529g/CAGL0K02959g/CAGL0E05566g/CAGL0J09328g/CAGL0D04642g/CAGL0D05478g	6
183	GO:0006470	protein dephosphorylation	3/217	53/5293	0.3711	1	0.9643	CAGL0K02959g/CAGL0J02904g/CAGL0D05478g	3
184	GO:0051701	interaction with host	3/217	53/5293	0.3711	1	0.9643	CAGL0E03762g/CAGL0L02453g/CAGL0A04829g	3
185	GO:0050790	regulation of catalytic activity	7/217	144/5293	0.3776	1	0.9643	CAGL0G04873g/CAGL0I07249g/CAGL0K02959g/CAGL0I08195g/CAGL0J09328g/CAGL0D04642g/CAGL0D05478g	7
186	GO:0032185	septin cytoskeleton organization	2/217	32/5293	0.38	1	0.9643	CAGL0J09328g/CAGL0I10318g	2
187	GO:0036166	phenotypic switching	2/217	32/5293	0.38	1	0.9643	CAGL0L02453g/CAGL0A04829g	2
188	GO:0090529	cell septum assembly	2/217	32/5293	0.38	1	0.9643	CAGL0E03762g/CAGL0G01034g	2
189	GO:0006869	lipid transport	3/217	54/5293	0.3824	1	0.9643	CAGL0C03289g/CAGL0L10142g/CAGL0G09273g	3
190	GO:0036170	filamentous growth of a population of unicellular organisms in response to starvation	7/217	146/5293	0.3912	1	0.9643	CAGL0E04884g/CAGL0F09075g/CAGL0G09735g/CAGL0H02145g/CAGL0J07502g/CAGL0A01628g/CAGL0D05478g	7
191	GO:0005977	glycogen metabolic process	2/217	33/5293	0.3947	1	0.9643	CAGL0F04917g/CAGL0J02904g	2
192	GO:0006006	glucose metabolic process	2/217	33/5293	0.3947	1	0.9643	CAGL0A04829g/CAGL0H06633g	2
193	GO:0009063	cellular amino acid catabolic process	2/217	33/5293	0.3947	1	0.9643	CAGL0D04026g/CAGL0M07920g	2
194	GO:0000073	mitotic spindle pole body separation	1/217	12/5293	0.3952	1	0.9643	CAGL0D04642g	1
195	GO:0000128	flocculation	1/217	12/5293	0.3952	1	0.9643	CAGL0L13299g	1
196	GO:0000147	actin cortical patch assembly	1/217	12/5293	0.3952	1	0.9643	CAGL0G09735g	1
197	GO:0006081	cellular aldehyde metabolic process	1/217	12/5293	0.3952	1	0.9643	CAGL0D04752g	1
198	GO:0006279	premeiotic DNA replication	1/217	12/5293	0.3952	1	0.9643	CAGL0D04642g	1
199	GO:0006740	NADPH regeneration	1/217	12/5293	0.3952	1	0.9643	CAGL0M06963g	1
200	GO:0008361	regulation of cell size	1/217	12/5293	0.3952	1	0.9643	CAGL0G01034g	1
201	GO:0009409	response to cold	1/217	12/5293	0.3952	1	0.9643	CAGL0K03003g	1
202	GO:0031452	negative regulation of heterochromatin assembly	1/217	12/5293	0.3952	1	0.9643	CAGL0J03960g	1
203	GO:0044416	induction by symbiont of host defense response	1/217	12/5293	0.3952	1	0.9643	CAGL0E03762g	1
204	GO:0046839	phospholipid dephosphorylation	1/217	12/5293	0.3952	1	0.9643	CAGL0K08272g	1
205	GO:1900442	positive regulation of filamentous growth of a population of unicellular organisms in response to neutral pH	1/217	12/5293	0.3952	1	0.9643	CAGL0H08107g	1
206	GO:1904669	ATP export	1/217	12/5293	0.3952	1	0.9643	CAGL0K02761g	1
207	GO:0035690	cellular response to drug	10/217	217/5293	0.3982	1	0.9643	CAGL0E03762g/CAGL0E04312g/CAGL0K03003g/CAGL0M01738g/CAGL0G01034g/CAGL0G03487g/CAGL0H08107g/CAGL0L10142g/CAGL0A01628g/CAGL0G04895g	10
208	GO:0016311	dephosphorylation	4/217	79/5293	0.4075	1	0.9643	CAGL0K02959g/CAGL0K08272g/CAGL0J02904g/CAGL0D05478g	4
209	GO:1900443	regulation of filamentous growth of a population of unicellular organisms in response to biotic stimulus	2/217	34/5293	0.4093	1	0.9643	CAGL0H02145g/CAGL0H08107g	2
210	GO:0000028	ribosomal small subunit assembly	1/217	13/5293	0.4201	1	0.9643	CAGL0G09735g	1
211	GO:0006998	nuclear envelope organization	1/217	13/5293	0.4201	1	0.9643	CAGL0K02959g	1
212	GO:0008298	intracellular mRNA localization	1/217	13/5293	0.4201	1	0.9643	CAGL0D05544g	1
213	GO:0031939	negative regulation of chromatin silencing at telomere	1/217	13/5293	0.4201	1	0.9643	CAGL0J03960g	1
214	GO:0032231	regulation of actin filament bundle assembly	1/217	13/5293	0.4201	1	0.9643	CAGL0G09735g	1
215	GO:0035306	positive regulation of dephosphorylation	1/217	13/5293	0.4201	1	0.9643	CAGL0K02959g	1
216	GO:0043619	regulation of transcription from RNA polymerase II promoter in response to oxidative stress	1/217	13/5293	0.4201	1	0.9643	CAGL0F09075g	1
217	GO:0043666	regulation of phosphoprotein phosphatase activity	1/217	13/5293	0.4201	1	0.9643	CAGL0D05478g	1
218	GO:0070588	calcium ion transmembrane transport	1/217	13/5293	0.4201	1	0.9643	CAGL0J01870g	1
219	GO:0006112	energy reserve metabolic process	2/217	35/5293	0.4237	1	0.9643	CAGL0F04917g/CAGL0J02904g	2
220	GO:0006383	transcription by RNA polymerase III	2/217	36/5293	0.4379	1	0.9643	CAGL0F08151g/CAGL0F09075g	2
221	GO:0006879	cellular iron ion homeostasis	2/217	36/5293	0.4379	1	0.9643	CAGL0E03762g/CAGL0J04048g	2
222	GO:0019752	carboxylic acid metabolic process	14/217	320/5293	0.4406	1	0.9643	CAGL0D00176g/CAGL0D04026g/CAGL0E01529g/CAGL0G03905g/CAGL0M07920g/CAGL0A04829g/CAGL0D04576g/CAGL0E05566g/CAGL0H00396g/CAGL0I05698g/CAGL0I08195g/CAGL0I08987g/CAGL0J04554g/CAGL0K05357g	14
223	GO:0006525	arginine metabolic process	1/217	14/5293	0.4439	1	0.9643	CAGL0I08987g	1
224	GO:0006641	triglyceride metabolic process	1/217	14/5293	0.4439	1	0.9643	CAGL0K02959g	1
225	GO:0009082	branched-chain amino acid biosynthetic process	1/217	14/5293	0.4439	1	0.9643	CAGL0H00396g	1
226	GO:0009113	purine nucleobase biosynthetic process	1/217	14/5293	0.4439	1	0.9643	CAGL0J10494g	1
227	GO:0040009	regulation of growth rate	1/217	14/5293	0.4439	1	0.9643	CAGL0E01353g	1
228	GO:0045740	positive regulation of DNA replication	1/217	14/5293	0.4439	1	0.9643	CAGL0D04642g	1
229	GO:0070873	regulation of glycogen metabolic process	1/217	14/5293	0.4439	1	0.9643	CAGL0F04917g	1
230	GO:0071285	cellular response to lithium ion	1/217	14/5293	0.4439	1	0.9643	CAGL0E03762g	1
231	GO:1900743	positive regulation of filamentous growth of a population of unicellular organisms in response to pH	1/217	14/5293	0.4439	1	0.9643	CAGL0H08107g	1
232	GO:0006875	cellular metal ion homeostasis	4/217	83/5293	0.4447	1	0.9643	CAGL0E03762g/CAGL0J04048g/CAGL0G03487g/CAGL0I04180g	4
233	GO:0009268	response to pH	4/217	83/5293	0.4447	1	0.9643	CAGL0E03762g/CAGL0E04312g/CAGL0F00407g/CAGL0H08107g	4
234	GO:0036177	filamentous growth of a population of unicellular organisms in response to pH	3/217	60/5293	0.449	1	0.9643	CAGL0E03762g/CAGL0F00407g/CAGL0H08107g	3
235	GO:0000921	septin ring assembly	1/217	15/5293	0.4668	1	0.9643	CAGL0I10318g	1
236	GO:0000973	posttranscriptional tethering of RNA polymerase II gene DNA at nuclear periphery	1/217	15/5293	0.4668	1	0.9643	CAGL0G00902g	1
237	GO:0006493	protein O-linked glycosylation	1/217	15/5293	0.4668	1	0.9643	CAGL0H09130g	1
238	GO:0006744	ubiquinone biosynthetic process	1/217	15/5293	0.4668	1	0.9643	CAGL0F08239g	1
239	GO:0006779	porphyrin-containing compound biosynthetic process	1/217	15/5293	0.4668	1	0.9643	CAGL0H08371g	1
240	GO:0010226	response to lithium ion	1/217	15/5293	0.4668	1	0.9643	CAGL0E03762g	1
241	GO:0031145	anaphase-promoting complex-dependent catabolic process	1/217	15/5293	0.4668	1	0.9643	CAGL0J02618g	1
242	GO:0033014	tetrapyrrole biosynthetic process	1/217	15/5293	0.4668	1	0.9643	CAGL0H08371g	1
243	GO:0043328	protein transport to vacuole involved in ubiquitin-dependent protein catabolic process via the multivesicular body sorting pathway	1/217	15/5293	0.4668	1	0.9643	CAGL0K02761g	1
244	GO:0051125	regulation of actin nucleation	1/217	15/5293	0.4668	1	0.9643	CAGL0G09735g	1
245	GO:0071071	regulation of phospholipid biosynthetic process	1/217	15/5293	0.4668	1	0.9643	CAGL0K02959g	1
246	GO:0030010	establishment of cell polarity	3/217	62/5293	0.4705	1	0.9643	CAGL0D04686g/CAGL0G04873g/CAGL0G09735g	3
247	GO:0042594	response to starvation	9/217	206/5293	0.4718	1	0.9643	CAGL0E03762g/CAGL0E04884g/CAGL0K09350g/CAGL0F09075g/CAGL0G09735g/CAGL0H02145g/CAGL0J07502g/CAGL0A01628g/CAGL0D05478g	9
248	GO:0006163	purine nucleotide metabolic process	4/217	86/5293	0.4722	1	0.9643	CAGL0E01529g/CAGL0A04829g/CAGL0E05566g/CAGL0I05698g	4
249	GO:0000909	sporocarp development involved in sexual reproduction	2/217	39/5293	0.4794	1	0.9643	CAGL0M12012g/CAGL0I08195g	2
250	GO:0031589	cell-substrate adhesion	2/217	39/5293	0.4794	1	0.9643	CAGL0K03003g/CAGL0H00396g	2
251	GO:0060627	regulation of vesicle-mediated transport	2/217	39/5293	0.4794	1	0.9643	CAGL0G04873g/CAGL0G01034g	2
252	GO:0043085	positive regulation of catalytic activity	3/217	63/5293	0.4812	1	0.9643	CAGL0G04873g/CAGL0I07249g/CAGL0K02959g	3
253	GO:0006409	tRNA export from nucleus	1/217	16/5293	0.4887	1	0.9643	CAGL0M06963g	1
254	GO:0009081	branched-chain amino acid metabolic process	1/217	16/5293	0.4887	1	0.9643	CAGL0H00396g	1
255	GO:0015867	ATP transport	1/217	16/5293	0.4887	1	0.9643	CAGL0K02761g	1
256	GO:0046580	negative regulation of Ras protein signal transduction	1/217	16/5293	0.4887	1	0.9643	CAGL0I07249g	1
257	GO:0097237	cellular response to toxic substance	1/217	16/5293	0.4887	1	0.9643	CAGL0L06666g	1
258	GO:1901522	positive regulation of transcription from RNA polymerase II promoter involved in cellular response to chemical stimulus	1/217	16/5293	0.4887	1	0.9643	CAGL0E04884g	1
259	GO:1903475	mitotic actomyosin contractile ring assembly	1/217	16/5293	0.4887	1	0.9643	CAGL0G09735g	1
260	GO:0055072	iron ion homeostasis	2/217	40/5293	0.4929	1	0.9643	CAGL0E03762g/CAGL0J04048g	2
261	GO:0034220	ion transmembrane transport	4/217	89/5293	0.4991	1	0.9643	CAGL0E01353g/CAGL0I02178g/CAGL0D04708g/CAGL0J01870g	4
262	GO:0009966	regulation of signal transduction	6/217	138/5293	0.5016	1	0.9643	CAGL0G04873g/CAGL0I07249g/CAGL0B04851g/CAGL0D06512g/CAGL0F09075g/CAGL0G08646g	6
263	GO:0016125	sterol metabolic process	2/217	41/5293	0.5061	1	0.9643	CAGL0D05566g/CAGL0K03003g	2
264	GO:0036244	cellular response to neutral pH	2/217	41/5293	0.5061	1	0.9643	CAGL0E03762g/CAGL0H08107g	2
265	GO:0006816	calcium ion transport	1/217	17/5293	0.5097	1	0.9643	CAGL0J01870g	1
266	GO:0033617	mitochondrial respiratory chain complex IV assembly	1/217	17/5293	0.5097	1	0.9643	CAGL0G09262g	1
267	GO:0034622	cellular protein-containing complex assembly	1/217	17/5293	0.5097	1	0.9643	CAGL0M01738g	1
268	GO:0007114	cell budding	2/217	42/5293	0.519	1	0.9643	CAGL0D04686g/CAGL0L01727g	2
269	GO:0071467	cellular response to pH	3/217	67/5293	0.5227	1	0.9643	CAGL0E03762g/CAGL0E04312g/CAGL0H08107g	3
270	GO:0000915	actomyosin contractile ring assembly	1/217	18/5293	0.5299	1	0.9643	CAGL0G09735g	1
271	GO:0000972	transcription-dependent tethering of RNA polymerase II gene DNA at nuclear periphery	1/217	18/5293	0.5299	1	0.9643	CAGL0G00902g	1
272	GO:0006144	purine nucleobase metabolic process	1/217	18/5293	0.5299	1	0.9643	CAGL0J10494g	1
273	GO:0006972	hyperosmotic response	1/217	18/5293	0.5299	1	0.9643	CAGL0K03003g	1
274	GO:0030473	nuclear migration along microtubule	1/217	18/5293	0.5299	1	0.9643	CAGL0C02937g	1
275	GO:0051058	negative regulation of small GTPase mediated signal transduction	1/217	18/5293	0.5299	1	0.9643	CAGL0I07249g	1
276	GO:0070193	synaptonemal complex organization	1/217	18/5293	0.5299	1	0.9643	CAGL0K06127g	1
277	GO:0000281	mitotic cytokinesis	3/217	68/5293	0.5328	1	0.9643	CAGL0D04686g/CAGL0G01034g/CAGL0G09735g	3
278	GO:0009267	cellular response to starvation	8/217	192/5293	0.5338	1	0.9643	CAGL0E03762g/CAGL0E04884g/CAGL0K09350g/CAGL0F09075g/CAGL0G09735g/CAGL0H02145g/CAGL0J07502g/CAGL0D05478g	8
279	GO:0006812	cation transport	5/217	118/5293	0.5354	1	0.9643	CAGL0E01353g/CAGL0D04708g/CAGL0J01870g/CAGL0L10142g/CAGL0L10912g	5
280	GO:0006352	DNA-templated transcription, initiation	3/217	69/5293	0.5427	1	0.9643	CAGL0F08151g/CAGL0I04180g/CAGL0D05478g	3
281	GO:0006400	tRNA modification	3/217	69/5293	0.5427	1	0.9643	CAGL0E05676g/CAGL0J04048g/CAGL0L10934g	3
282	GO:0000154	rRNA modification	1/217	19/5293	0.5492	1	0.9643	CAGL0M06941g	1
283	GO:0000754	adaptation of signaling pathway by response to pheromone involved in conjugation with cellular fusion	1/217	19/5293	0.5492	1	0.9643	CAGL0G08646g	1
284	GO:0005978	glycogen biosynthetic process	1/217	19/5293	0.5492	1	0.9643	CAGL0F04917g	1
285	GO:0032955	regulation of division septum assembly	1/217	19/5293	0.5492	1	0.9643	CAGL0E03762g	1
286	GO:0043162	ubiquitin-dependent protein catabolic process via the multivesicular body sorting pathway	1/217	19/5293	0.5492	1	0.9643	CAGL0K02761g	1
287	GO:0045943	positive regulation of transcription by RNA polymerase I	1/217	19/5293	0.5492	1	0.9643	CAGL0F09075g	1
288	GO:0071218	cellular response to misfolded protein	1/217	19/5293	0.5492	1	0.9643	CAGL0L06666g	1
289	GO:0009451	RNA modification	4/217	95/5293	0.551	1	0.9643	CAGL0E05676g/CAGL0J04048g/CAGL0L10934g/CAGL0M06941g	4
290	GO:0045859	regulation of protein kinase activity	2/217	45/5293	0.5566	1	0.9643	CAGL0J09328g/CAGL0D04642g	2
291	GO:0019693	ribose phosphate metabolic process	4/217	96/5293	0.5594	1	0.9643	CAGL0E01529g/CAGL0A04829g/CAGL0E05566g/CAGL0I05698g	4
292	GO:0006826	iron ion transport	1/217	20/5293	0.5678	1	0.9643	CAGL0D04708g	1
293	GO:0008535	respiratory chain complex IV assembly	1/217	20/5293	0.5678	1	0.9643	CAGL0G09262g	1
294	GO:0030833	regulation of actin filament polymerization	1/217	20/5293	0.5678	1	0.9643	CAGL0G04895g	1
295	GO:0032878	regulation of establishment or maintenance of cell polarity	1/217	20/5293	0.5678	1	0.9643	CAGL0J09328g	1
296	GO:0044396	actin cortical patch organization	1/217	20/5293	0.5678	1	0.9643	CAGL0G09735g	1
297	GO:0098609	cell-cell adhesion	1/217	20/5293	0.5678	1	0.9643	CAGL0L13299g	1
298	GO:0016573	histone acetylation	2/217	46/5293	0.5686	1	0.9643	CAGL0M01738g/CAGL0F01837g	2
299	GO:0009060	aerobic respiration	3/217	72/5293	0.5719	1	0.9643	CAGL0F04565g/CAGL0M12012g/CAGL0D05544g	3
300	GO:0030001	metal ion transport	3/217	72/5293	0.5719	1	0.9643	CAGL0E01353g/CAGL0D04708g/CAGL0J01870g	3
301	GO:0007052	mitotic spindle organization	2/217	47/5293	0.5804	1	0.9643	CAGL0D04642g/CAGL0I10318g	2
302	GO:0018393	internal peptidyl-lysine acetylation	2/217	47/5293	0.5804	1	0.9643	CAGL0M01738g/CAGL0F01837g	2
303	GO:1900429	negative regulation of filamentous growth of a population of unicellular organisms	2/217	47/5293	0.5804	1	0.9643	CAGL0E05566g/CAGL0F09075g	2
304	GO:0000910	cytokinesis	4/217	99/5293	0.5841	1	0.9643	CAGL0D04686g/CAGL0E03762g/CAGL0G01034g/CAGL0G09735g	4
305	GO:0030435	sporulation resulting in formation of a cellular spore	6/217	150/5293	0.5844	1	0.9643	CAGL0E03762g/CAGL0K02101g/CAGL0C02937g/CAGL0F09075g/CAGL0G08624g/CAGL0K02761g	6
306	GO:0000436	carbon catabolite activation of transcription from RNA polymerase II promoter	1/217	21/5293	0.5855	1	0.9643	CAGL0E04884g	1
307	GO:0006094	gluconeogenesis	1/217	21/5293	0.5855	1	0.9643	CAGL0H06633g	1
308	GO:0007129	synapsis	1/217	21/5293	0.5855	1	0.9643	CAGL0A01606g	1
309	GO:0038202	TORC1 signaling	1/217	21/5293	0.5855	1	0.9643	CAGL0F09075g	1
310	GO:0043935	sexual sporulation resulting in formation of a cellular spore	5/217	126/5293	0.5946	1	0.9643	CAGL0E03762g/CAGL0K02101g/CAGL0C02937g/CAGL0G08624g/CAGL0K02761g	5
311	GO:0006896	Golgi to vacuole transport	1/217	22/5293	0.6026	1	0.9643	CAGL0J01111g	1
312	GO:0009086	methionine biosynthetic process	1/217	22/5293	0.6026	1	0.9643	CAGL0D04576g	1
313	GO:0051031	tRNA transport	1/217	22/5293	0.6026	1	0.9643	CAGL0M06963g	1
314	GO:0090307	mitotic spindle assembly	1/217	22/5293	0.6026	1	0.9643	CAGL0D04642g	1
315	GO:0043549	regulation of kinase activity	2/217	49/5293	0.6033	1	0.9643	CAGL0J09328g/CAGL0D04642g	2
316	GO:0060258	negative regulation of filamentous growth	2/217	50/5293	0.6144	1	0.9643	CAGL0E05566g/CAGL0F09075g	2
317	GO:0000747	conjugation with cellular fusion	5/217	129/5293	0.6157	1	0.9643	CAGL0D04686g/CAGL0M01738g/CAGL0F09075g/CAGL0G08646g/CAGL0I08195g	5
318	GO:0000097	sulfur amino acid biosynthetic process	1/217	23/5293	0.619	1	0.9643	CAGL0D04576g	1
319	GO:1902275	regulation of chromatin organization	1/217	23/5293	0.619	1	0.9643	CAGL0J03960g	1
320	GO:0000480	endonucleolytic cleavage in 5'-ETS of tricistronic rRNA transcript (SSU-rRNA, 5.8S rRNA, LSU-rRNA)	1/217	24/5293	0.6347	1	0.9643	CAGL0H02937g	1
321	GO:0007018	microtubule-based movement	1/217	24/5293	0.6347	1	0.9643	CAGL0C02937g	1
322	GO:0009116	nucleoside metabolic process	1/217	24/5293	0.6347	1	0.9643	CAGL0J10494g	1
323	GO:0031321	ascospore-type prospore assembly	1/217	24/5293	0.6347	1	0.9643	CAGL0K02761g	1
324	GO:0042149	cellular response to glucose starvation	1/217	24/5293	0.6347	1	0.9643	CAGL0K09350g	1
325	GO:0046496	nicotinamide nucleotide metabolic process	1/217	24/5293	0.6347	1	0.9643	CAGL0M06963g	1
326	GO:0051225	spindle assembly	1/217	24/5293	0.6347	1	0.9643	CAGL0D04642g	1
327	GO:0006367	transcription initiation from RNA polymerase II promoter	2/217	52/5293	0.6359	1	0.9643	CAGL0I04180g/CAGL0D05478g	2
328	GO:0030466	chromatin silencing at silent mating-type cassette	2/217	52/5293	0.6359	1	0.9643	CAGL0G00902g/CAGL0J03960g	2
329	GO:0000282	cellular bud site selection	1/217	25/5293	0.6497	1	0.9643	CAGL0D04686g	1
330	GO:0000472	endonucleolytic cleavage to generate mature 5'-end of SSU-rRNA from (SSU-rRNA, 5.8S rRNA, LSU-rRNA)	1/217	25/5293	0.6497	1	0.9643	CAGL0H02937g	1
331	GO:0002098	tRNA wobble uridine modification	1/217	25/5293	0.6497	1	0.9643	CAGL0J04048g	1
332	GO:0006555	methionine metabolic process	1/217	25/5293	0.6497	1	0.9643	CAGL0D04576g	1
333	GO:0007117	budding cell bud growth	1/217	25/5293	0.6497	1	0.9643	CAGL0L01727g	1
334	GO:0009636	response to toxic substance	1/217	25/5293	0.6497	1	0.9643	CAGL0L06666g	1
335	GO:0030174	regulation of DNA-dependent DNA replication initiation	1/217	25/5293	0.6497	1	0.9643	CAGL0J01529g	1
336	GO:0043937	regulation of sporulation	1/217	25/5293	0.6497	1	0.9643	CAGL0I08195g	1
337	GO:0034605	cellular response to heat	3/217	81/5293	0.6522	1	0.9643	CAGL0E04312g/CAGL0G00902g/CAGL0H08107g	3
338	GO:0016570	histone modification	4/217	108/5293	0.6531	1	0.9643	CAGL0G02739g/CAGL0J01529g/CAGL0M01738g/CAGL0F01837g	4
339	GO:0007163	establishment or maintenance of cell polarity	5/217	135/5293	0.6559	1	0.9643	CAGL0D04686g/CAGL0G04873g/CAGL0G09735g/CAGL0J09328g/CAGL0G04895g	5
340	GO:0006275	regulation of DNA replication	2/217	54/5293	0.6564	1	0.9643	CAGL0J01529g/CAGL0D04642g	2
341	GO:0030003	cellular cation homeostasis	4/217	109/5293	0.6602	1	0.9643	CAGL0E03762g/CAGL0J04048g/CAGL0G03487g/CAGL0I04180g	4
342	GO:0006820	anion transport	3/217	82/5293	0.6605	1	0.9643	CAGL0I02178g/CAGL0C03289g/CAGL0K02761g	3
343	GO:0009266	response to temperature stimulus	4/217	110/5293	0.6673	1	0.9643	CAGL0E04312g/CAGL0K03003g/CAGL0G00902g/CAGL0H08107g	4
344	GO:0045333	cellular respiration	3/217	83/5293	0.6686	1	0.9643	CAGL0F04565g/CAGL0M12012g/CAGL0D05544g	3
345	GO:0036180	filamentous growth of a population of unicellular organisms in response to biotic stimulus	6/217	164/5293	0.6713	1	0.9643	CAGL0E04884g/CAGL0G09735g/CAGL0H02145g/CAGL0H08107g/CAGL0J07502g/CAGL0D05478g	6
346	GO:0009117	nucleotide metabolic process	5/217	138/5293	0.6749	1	0.9643	CAGL0E01529g/CAGL0A04829g/CAGL0E05566g/CAGL0I05698g/CAGL0M06963g	5
347	GO:0032956	regulation of actin cytoskeleton organization	2/217	56/5293	0.676	1	0.9643	CAGL0G09735g/CAGL0G04895g	2
348	GO:0006915	apoptotic process	1/217	27/5293	0.678	1	0.9643	CAGL0I02574g	1
349	GO:0007097	nuclear migration	1/217	27/5293	0.678	1	0.9643	CAGL0C02937g	1
350	GO:0007017	microtubule-based process	4/217	112/5293	0.6812	1	0.9643	CAGL0F00407g/CAGL0C02937g/CAGL0D04642g/CAGL0I10318g	4
351	GO:0006348	chromatin silencing at telomere	2/217	57/5293	0.6855	1	0.9643	CAGL0I05060g/CAGL0C00759g	2
352	GO:0051301	cell division	5/217	140/5293	0.6873	1	0.9643	CAGL0D04686g/CAGL0E03762g/CAGL0L01727g/CAGL0G01034g/CAGL0G09735g	5
353	GO:0051017	actin filament bundle assembly	1/217	28/5293	0.6912	1	0.9643	CAGL0G09735g	1
354	GO:0070507	regulation of microtubule cytoskeleton organization	1/217	28/5293	0.6912	1	0.9643	CAGL0D04642g	1
355	GO:0097064	ncRNA export from nucleus	1/217	28/5293	0.6912	1	0.9643	CAGL0M06963g	1
356	GO:0048869	cellular developmental process	8/217	221/5293	0.6932	1	0.9643	CAGL0E01353g/CAGL0E03762g/CAGL0K02101g/CAGL0C02937g/CAGL0F09075g/CAGL0G08624g/CAGL0I08195g/CAGL0K02761g	8
357	GO:0030437	ascospore formation	4/217	114/5293	0.6946	1	0.9643	CAGL0E03762g/CAGL0K02101g/CAGL0G08624g/CAGL0K02761g	4
358	GO:0051258	protein polymerization	2/217	59/5293	0.7037	1	0.9643	CAGL0G09735g/CAGL0G04895g	2
359	GO:0000422	autophagy of mitochondrion	1/217	29/5293	0.704	1	0.9643	CAGL0H08261g	1
360	GO:0006696	ergosterol biosynthetic process	1/217	29/5293	0.704	1	0.9643	CAGL0K03003g	1
361	GO:0051604	protein maturation	3/217	88/5293	0.7069	1	0.9643	CAGL0D04686g/CAGL0F00407g/CAGL0G03905g	3
362	GO:0006873	cellular ion homeostasis	4/217	116/5293	0.7076	1	0.9643	CAGL0E03762g/CAGL0J04048g/CAGL0G03487g/CAGL0I04180g	4
363	GO:0001510	RNA methylation	1/217	30/5293	0.7162	1	0.9643	CAGL0M06941g	1
364	GO:0006356	regulation of transcription by RNA polymerase I	1/217	30/5293	0.7162	1	0.9643	CAGL0F09075g	1
365	GO:0008204	ergosterol metabolic process	1/217	30/5293	0.7162	1	0.9643	CAGL0K03003g	1
366	GO:0051300	spindle pole body organization	1/217	30/5293	0.7162	1	0.9643	CAGL0D04642g	1
367	GO:0061572	actin filament bundle organization	1/217	30/5293	0.7162	1	0.9643	CAGL0G09735g	1
368	GO:0000463	maturation of LSU-rRNA from tricistronic rRNA transcript (SSU-rRNA, 5.8S rRNA, LSU-rRNA)	1/217	31/5293	0.7279	1	0.9643	CAGL0H03773g	1
369	GO:0045454	cell redox homeostasis	1/217	31/5293	0.7279	1	0.9643	CAGL0L02431g	1
370	GO:0045595	regulation of cell differentiation	1/217	31/5293	0.7279	1	0.9643	CAGL0I08195g	1
371	GO:0045936	negative regulation of phosphate metabolic process	1/217	31/5293	0.7279	1	0.9643	CAGL0K02959g	1
372	GO:0006360	transcription by RNA polymerase I	2/217	62/5293	0.7294	1	0.9643	CAGL0K01969g/CAGL0F09075g	2
373	GO:0000183	chromatin silencing at rDNA	1/217	32/5293	0.7391	1	0.9643	CAGL0I05060g	1
374	GO:0032511	late endosome to vacuole transport via multivesicular body sorting pathway	1/217	32/5293	0.7391	1	0.9643	CAGL0K02761g	1
375	GO:0045143	homologous chromosome segregation	1/217	32/5293	0.7391	1	0.9643	CAGL0A01606g	1
376	GO:0007029	endoplasmic reticulum organization	1/217	33/5293	0.7499	1	0.9643	CAGL0J04026g	1
377	GO:0016126	sterol biosynthetic process	1/217	33/5293	0.7499	1	0.9643	CAGL0K03003g	1
378	GO:0033108	mitochondrial respiratory chain complex assembly	1/217	33/5293	0.7499	1	0.9643	CAGL0G09262g	1
379	GO:0042147	retrograde transport, endosome to Golgi	1/217	33/5293	0.7499	1	0.9643	CAGL0J01111g	1
380	GO:0006325	chromatin organization	6/217	179/5293	0.7507	1	0.9643	CAGL0E04884g/CAGL0I05060g/CAGL0J01529g/CAGL0L10934g/CAGL0G00902g/CAGL0J03960g	6
381	GO:1901135	carbohydrate derivative metabolic process	10/217	289/5293	0.7567	1	0.9643	CAGL0E01529g/CAGL0E05676g/CAGL0H09130g/CAGL0J10494g/CAGL0A04829g/CAGL0C04004g/CAGL0C05137g/CAGL0E05566g/CAGL0I05698g/CAGL0M06963g	10
382	GO:0030071	regulation of mitotic metaphase/anaphase transition	1/217	34/5293	0.7602	1	0.9643	CAGL0J02618g	1
383	GO:0032509	endosome transport via multivesicular body sorting pathway	1/217	34/5293	0.7602	1	0.9643	CAGL0K02761g	1
384	GO:0071985	multivesicular body sorting pathway	1/217	34/5293	0.7602	1	0.9643	CAGL0K02761g	1
385	GO:0001932	regulation of protein phosphorylation	2/217	66/5293	0.7607	1	0.9643	CAGL0J09328g/CAGL0D04642g	2
386	GO:0008033	tRNA processing	3/217	97/5293	0.7673	1	0.9643	CAGL0E05676g/CAGL0J04048g/CAGL0L10934g	3
387	GO:0009408	response to heat	3/217	97/5293	0.7673	1	0.9643	CAGL0E04312g/CAGL0G00902g/CAGL0H08107g	3
388	GO:0000096	sulfur amino acid metabolic process	1/217	35/5293	0.7701	1	0.9643	CAGL0D04576g	1
389	GO:0000447	endonucleolytic cleavage in ITS1 to separate SSU-rRNA from 5.8S rRNA and LSU-rRNA from tricistronic rRNA transcript (SSU-rRNA, 5.8S rRNA, LSU-rRNA)	1/217	35/5293	0.7701	1	0.9643	CAGL0H02937g	1
390	GO:0000470	maturation of LSU-rRNA	1/217	35/5293	0.7701	1	0.9643	CAGL0H03773g	1
391	GO:0006694	steroid biosynthetic process	1/217	35/5293	0.7701	1	0.9643	CAGL0K03003g	1
392	GO:0034727	piecemeal microautophagy of the nucleus	1/217	35/5293	0.7701	1	0.9643	CAGL0B02101g	1
393	GO:0000469	cleavage involved in rRNA processing	2/217	68/5293	0.7752	1	0.9643	CAGL0H03773g/CAGL0H02937g	2
394	GO:0007131	reciprocal meiotic recombination	2/217	68/5293	0.7752	1	0.9643	CAGL0A01606g/CAGL0K06127g	2
395	GO:0015931	nucleobase-containing compound transport	4/217	128/5293	0.7774	1	0.9643	CAGL0G00902g/CAGL0K02761g/CAGL0G09273g/CAGL0M06963g	4
396	GO:0007091	metaphase/anaphase transition of mitotic cell cycle	1/217	36/5293	0.7796	1	0.9643	CAGL0J02618g	1
397	GO:0055114	oxidation-reduction process	6/217	186/5293	0.7826	1	0.9643	CAGL0D00176g/CAGL0H06853g/CAGL0I02574g/CAGL0L06666g/CAGL0C05137g/CAGL0F08239g	6
398	GO:0008610	lipid biosynthetic process	6/217	187/5293	0.7869	1	0.9643	CAGL0K02959g/CAGL0K03003g/CAGL0F09075g/CAGL0I10054g/CAGL0K08272g/CAGL0K02739g	6
399	GO:0006338	chromatin remodeling	5/217	159/5293	0.7885	1	0.9643	CAGL0I05060g/CAGL0J01529g/CAGL0L10934g/CAGL0G00902g/CAGL0J03960g	5
400	GO:0009651	response to salt stress	1/217	37/5293	0.7887	1	0.9643	CAGL0F09075g	1
401	GO:0016973	poly(A)+ mRNA export from nucleus	1/217	37/5293	0.7887	1	0.9643	CAGL0G00902g	1
402	GO:0000466	maturation of 5.8S rRNA from tricistronic rRNA transcript (SSU-rRNA, 5.8S rRNA, LSU-rRNA)	2/217	70/5293	0.7889	1	0.9643	CAGL0H03773g/CAGL0H02937g	2
403	GO:0000288	nuclear-transcribed mRNA catabolic process, deadenylation-dependent decay	1/217	38/5293	0.7974	1	0.9643	CAGL0D05544g	1
404	GO:0051306	mitotic sister chromatid separation	1/217	38/5293	0.7974	1	0.9643	CAGL0J02618g	1
405	GO:0007165	signal transduction	13/217	382/5293	0.7988	1	0.9643	CAGL0E03762g/CAGL0E06292g/CAGL0G04873g/CAGL0I07249g/CAGL0K09350g/CAGL0B04851g/CAGL0D06512g/CAGL0F09075g/CAGL0G08646g/CAGL0H02145g/CAGL0I03872g/CAGL0I08195g/CAGL0J00715g	13
406	GO:0000226	microtubule cytoskeleton organization	3/217	103/5293	0.8016	1	0.9643	CAGL0F00407g/CAGL0D04642g/CAGL0I10318g	3
407	GO:0007000	nucleolus organization	1/217	39/5293	0.8058	1	0.9643	CAGL0I05060g	1
408	GO:0018022	peptidyl-lysine methylation	1/217	39/5293	0.8058	1	0.9643	CAGL0E04070g	1
409	GO:0031929	TOR signaling	1/217	39/5293	0.8058	1	0.9643	CAGL0F09075g	1
410	GO:0098656	anion transmembrane transport	1/217	39/5293	0.8058	1	0.9643	CAGL0I02178g	1
411	GO:0007015	actin filament organization	2/217	73/5293	0.808	1	0.9643	CAGL0G09735g/CAGL0G04895g	2
412	GO:0016197	endosomal transport	2/217	73/5293	0.808	1	0.9643	CAGL0J01111g/CAGL0K02761g	2
413	GO:0043254	regulation of protein complex assembly	2/217	73/5293	0.808	1	0.9643	CAGL0K09350g/CAGL0G04895g	2
414	GO:0000002	mitochondrial genome maintenance	1/217	40/5293	0.8138	1	0.9643	CAGL0K10164g	1
415	GO:0006487	protein N-linked glycosylation	1/217	41/5293	0.8215	1	0.9643	CAGL0H09130g	1
416	GO:0016237	lysosomal microautophagy	1/217	41/5293	0.8215	1	0.9643	CAGL0B02101g	1
417	GO:0006790	sulfur compound metabolic process	3/217	108/5293	0.8269	1	0.9643	CAGL0G03905g/CAGL0J04048g/CAGL0D04576g	3
418	GO:0030433	ubiquitin-dependent ERAD pathway	1/217	42/5293	0.8288	1	0.9643	CAGL0J02486g	1
419	GO:0032968	positive regulation of transcription elongation from RNA polymerase II promoter	1/217	42/5293	0.8288	1	0.9643	CAGL0D05478g	1
420	GO:0042255	ribosome assembly	1/217	42/5293	0.8288	1	0.9643	CAGL0G09735g	1
421	GO:0045324	late endosome to vacuole transport	1/217	42/5293	0.8288	1	0.9643	CAGL0K02761g	1
422	GO:0034599	cellular response to oxidative stress	3/217	109/5293	0.8316	1	0.9643	CAGL0G02739g/CAGL0L06666g/CAGL0F09075g	3
423	GO:0030866	cortical actin cytoskeleton organization	1/217	43/5293	0.8359	1	0.9643	CAGL0G09735g	1
424	GO:0031139	positive regulation of conjugation with cellular fusion	1/217	43/5293	0.8359	1	0.9643	CAGL0I08195g	1
425	GO:0007031	peroxisome organization	1/217	44/5293	0.8427	1	0.9643	CAGL0E04884g	1
426	GO:0000479	endonucleolytic cleavage of tricistronic rRNA transcript (SSU-rRNA, 5.8S rRNA, LSU-rRNA)	1/217	45/5293	0.8492	1	0.9643	CAGL0H02937g	1
427	GO:0030476	ascospore wall assembly	1/217	45/5293	0.8492	1	0.9643	CAGL0G08624g	1
428	GO:0034243	regulation of transcription elongation from RNA polymerase II promoter	1/217	45/5293	0.8492	1	0.9643	CAGL0D05478g	1
429	GO:0051304	chromosome separation	1/217	45/5293	0.8492	1	0.9643	CAGL0J02618g	1
430	GO:0000478	endonucleolytic cleavage involved in rRNA processing	1/217	46/5293	0.8554	1	0.9643	CAGL0H02937g	1
431	GO:0006486	protein glycosylation	2/217	82/5293	0.8566	1	0.9643	CAGL0H09130g/CAGL0C04004g	2
432	GO:0030448	hyphal growth	3/217	115/5293	0.8577	1	0.9643	CAGL0A04829g/CAGL0F09075g/CAGL0H00396g	3
433	GO:0051321	meiotic cell cycle	9/217	294/5293	0.8612	1	0.9643	CAGL0A01606g/CAGL0E03762g/CAGL0K02101g/CAGL0K06127g/CAGL0C02937g/CAGL0G08624g/CAGL0K02761g/CAGL0J03960g/CAGL0D04642g	9
434	GO:0006368	transcription elongation from RNA polymerase II promoter	2/217	83/5293	0.8612	1	0.9643	CAGL0J01529g/CAGL0D05478g	2
435	GO:0032786	positive regulation of DNA-templated transcription, elongation	1/217	47/5293	0.8614	1	0.9643	CAGL0D05478g	1
436	GO:0071940	fungal-type cell wall assembly	1/217	47/5293	0.8614	1	0.9643	CAGL0G08624g	1
437	GO:0000070	mitotic sister chromatid segregation	3/217	116/5293	0.8617	1	0.9643	CAGL0J02618g/CAGL0D04642g/CAGL0I10318g	3
438	GO:0070726	cell wall assembly	1/217	48/5293	0.8671	1	0.9643	CAGL0G08624g	1
439	GO:0006970	response to osmotic stress	2/217	85/5293	0.8701	1	0.9643	CAGL0K03003g/CAGL0F09075g	2
440	GO:0006997	nucleus organization	2/217	85/5293	0.8701	1	0.9643	CAGL0I05060g/CAGL0K02959g	2
441	GO:0061157	mRNA destabilization	1/217	49/5293	0.8726	1	0.9643	CAGL0D05544g	1
442	GO:0071470	cellular response to osmotic stress	1/217	49/5293	0.8726	1	0.9643	CAGL0K03003g	1
443	GO:0032784	regulation of DNA-templated transcription, elongation	1/217	50/5293	0.8779	1	0.9643	CAGL0D05478g	1
444	GO:0010629	negative regulation of gene expression	6/217	215/5293	0.8829	1	0.9643	CAGL0I05060g/CAGL0J01529g/CAGL0L10934g/CAGL0G00902g/CAGL0J03960g/CAGL0D05544g	6
445	GO:0043618	regulation of transcription from RNA polymerase II promoter in response to stress	1/217	51/5293	0.883	1	0.9643	CAGL0F09075g	1
446	GO:0045132	meiotic chromosome segregation	1/217	51/5293	0.883	1	0.9643	CAGL0A01606g	1
447	GO:0006606	protein import into nucleus	1/217	52/5293	0.8878	1	0.9643	CAGL0G00902g	1
448	GO:0006354	DNA-templated transcription, elongation	2/217	90/5293	0.8901	1	0.9643	CAGL0J01529g/CAGL0D05478g	2
449	GO:0007127	meiosis I	2/217	90/5293	0.8901	1	0.9643	CAGL0A01606g/CAGL0K06127g	2
450	GO:0006979	response to oxidative stress	3/217	126/5293	0.8964	1	0.9643	CAGL0G02739g/CAGL0L06666g/CAGL0F09075g	3
451	GO:0006479	protein methylation	1/217	54/5293	0.8969	1	0.9643	CAGL0E04070g	1
452	GO:0032259	methylation	2/217	93/5293	0.9006	1	0.9643	CAGL0E04070g/CAGL0M06941g	2
453	GO:0006270	DNA replication initiation	1/217	55/5293	0.9012	1	0.9643	CAGL0J01529g	1
454	GO:0030163	protein catabolic process	6/217	224/5293	0.9047	1	0.9643	CAGL0H06105g/CAGL0I04884g/CAGL0J00473g/CAGL0J02486g/CAGL0J02618g/CAGL0K02761g	6
455	GO:0033260	nuclear DNA replication	1/217	57/5293	0.9092	1	0.9643	CAGL0D04642g	1
456	GO:0043488	regulation of mRNA stability	1/217	57/5293	0.9092	1	0.9643	CAGL0D05544g	1
457	GO:0051983	regulation of chromosome segregation	1/217	57/5293	0.9092	1	0.9643	CAGL0J02618g	1
458	GO:0007034	vacuolar transport	3/217	131/5293	0.9107	1	0.9643	CAGL0G03487g/CAGL0J01111g/CAGL0K02761g	3
459	GO:0000082	G1/S transition of mitotic cell cycle	1/217	58/5293	0.913	1	0.9643	CAGL0D04642g	1
460	GO:0010628	positive regulation of gene expression	1/217	58/5293	0.913	1	0.9643	CAGL0J03960g	1
461	GO:0044786	cell cycle DNA replication	1/217	58/5293	0.913	1	0.9643	CAGL0D04642g	1
462	GO:0051170	import into nucleus	1/217	58/5293	0.913	1	0.9643	CAGL0G00902g	1
463	GO:0061013	regulation of mRNA catabolic process	1/217	58/5293	0.913	1	0.9643	CAGL0D05544g	1
464	GO:0006468	protein phosphorylation	5/217	198/5293	0.9156	1	0.9643	CAGL0F00649g/CAGL0K09350g/CAGL0F09075g/CAGL0J09328g/CAGL0D04642g	5
465	GO:0000749	response to pheromone triggering conjugation with cellular fusion	1/217	59/5293	0.9166	1	0.9643	CAGL0G08646g	1
466	GO:0006892	post-Golgi vesicle-mediated transport	1/217	59/5293	0.9166	1	0.9643	CAGL0J01111g	1
467	GO:0019236	response to pheromone	1/217	62/5293	0.9265	1	0.9643	CAGL0G08646g	1
468	GO:0017148	negative regulation of translation	1/217	63/5293	0.9296	1	0.9643	CAGL0D05544g	1
469	GO:0006629	lipid metabolic process	8/217	299/5293	0.9311	1	0.9643	CAGL0D05566g/CAGL0K02959g/CAGL0K03003g/CAGL0F09075g/CAGL0I10054g/CAGL0K08272g/CAGL0L10142g/CAGL0K02739g	8
470	GO:0006406	mRNA export from nucleus	1/217	65/5293	0.9353	1	0.9643	CAGL0G00902g	1
471	GO:0000724	double-strand break repair via homologous recombination	1/217	66/5293	0.938	1	0.9643	CAGL0K06127g	1
472	GO:0007010	cytoskeleton organization	6/217	242/5293	0.9382	1	0.9643	CAGL0F00407g/CAGL0G09735g/CAGL0J09328g/CAGL0D04642g/CAGL0G04895g/CAGL0I10318g	6
473	GO:0042274	ribosomal small subunit biogenesis	2/217	107/5293	0.9386	1	0.9643	CAGL0G09735g/CAGL0H02937g	2
474	GO:0051028	mRNA transport	1/217	67/5293	0.9406	1	0.9643	CAGL0G00902g	1
475	GO:0032880	regulation of protein localization	1/217	68/5293	0.943	1	0.9643	CAGL0F09075g	1
476	GO:0034504	protein localization to nucleus	1/217	68/5293	0.943	1	0.9643	CAGL0G00902g	1
477	GO:0000086	G2/M transition of mitotic cell cycle	1/217	69/5293	0.9454	1	0.9643	CAGL0D04642g	1
478	GO:0034976	response to endoplasmic reticulum stress	1/217	69/5293	0.9454	1	0.9643	CAGL0J02486g	1
479	GO:0035556	intracellular signal transduction	7/217	281/5293	0.9486	1	0.9643	CAGL0E06292g/CAGL0G04873g/CAGL0I07249g/CAGL0B04851g/CAGL0D06512g/CAGL0F09075g/CAGL0J00715g	7
480	GO:0044255	cellular lipid metabolic process	7/217	285/5293	0.9533	1	0.9643	CAGL0K02959g/CAGL0K03003g/CAGL0F09075g/CAGL0I10054g/CAGL0K08272g/CAGL0L10142g/CAGL0K02739g	7
481	GO:0006511	ubiquitin-dependent protein catabolic process	4/217	188/5293	0.9545	1	0.9643	CAGL0H06105g/CAGL0J02486g/CAGL0J02618g/CAGL0K02761g	4
482	GO:0000725	recombinational repair	1/217	74/5293	0.9558	1	0.9643	CAGL0K06127g	1
483	GO:0007059	chromosome segregation	4/217	193/5293	0.9607	1	0.9643	CAGL0A01606g/CAGL0J02618g/CAGL0D04642g/CAGL0I10318g	4
484	GO:0000462	maturation of SSU-rRNA from tricistronic rRNA transcript (SSU-rRNA, 5.8S rRNA, LSU-rRNA)	1/217	78/5293	0.9627	1	0.9643	CAGL0H02937g	1
485	GO:0006399	tRNA metabolic process	3/217	163/5293	0.967	1	0.9643	CAGL0E05676g/CAGL0J04048g/CAGL0L10934g	3
486	GO:0043161	proteasome-mediated ubiquitin-dependent protein catabolic process	2/217	125/5293	0.9675	1	0.9643	CAGL0J02486g/CAGL0J02618g	2
487	GO:0042273	ribosomal large subunit biogenesis	1/217	82/5293	0.9686	1	0.9643	CAGL0H03773g	1
488	GO:0030036	actin cytoskeleton organization	2/217	127/5293	0.9698	1	0.9643	CAGL0G09735g/CAGL0G04895g	2
489	GO:0030029	actin filament-based process	2/217	129/5293	0.9719	1	0.9643	CAGL0G09735g/CAGL0G04895g	2
490	GO:0006623	protein targeting to vacuole	1/217	85/5293	0.9723	1	0.9643	CAGL0K02761g	1
491	GO:0010498	proteasomal protein catabolic process	2/217	130/5293	0.9729	1	0.9643	CAGL0J02486g/CAGL0J02618g	2
492	GO:0051603	proteolysis involved in cellular protein catabolic process	4/217	206/5293	0.9733	1	0.9643	CAGL0H06105g/CAGL0J02486g/CAGL0J02618g/CAGL0K02761g	4
493	GO:0006508	proteolysis	7/217	308/5293	0.9737	1	0.9643	CAGL0E01837g/CAGL0E01859g/CAGL0H06105g/CAGL0J02486g/CAGL0J02618g/CAGL0K02761g/CAGL0E01881g	7
494	GO:0006261	DNA-dependent DNA replication	2/217	131/5293	0.9739	1	0.9643	CAGL0J01529g/CAGL0D04642g	2
495	GO:0007033	vacuole organization	1/217	88/5293	0.9756	1	0.9643	CAGL0G09735g	1
496	GO:0030490	maturation of SSU-rRNA	1/217	90/5293	0.9776	1	0.9643	CAGL0H02937g	1
497	GO:0006260	DNA replication	2/217	139/5293	0.9805	1	0.9643	CAGL0J01529g/CAGL0D04642g	2
498	GO:0006914	autophagy	2/217	139/5293	0.9805	1	0.9643	CAGL0B02101g/CAGL0H08261g	2
499	GO:0000280	nuclear division	5/217	252/5293	0.9806	1	0.9643	CAGL0A01606g/CAGL0K06127g/CAGL0J02618g/CAGL0D04642g/CAGL0I10318g	5
500	GO:0000956	nuclear-transcribed mRNA catabolic process	1/217	94/5293	0.9811	1	0.9643	CAGL0D05544g	1
501	GO:0051276	chromosome organization	6/217	288/5293	0.9815	1	0.9643	CAGL0A01606g/CAGL0K06127g/CAGL0G00902g/CAGL0J02618g/CAGL0D04642g/CAGL0I10318g	6
502	GO:0016236	macroautophagy	1/217	95/5293	0.9819	1	0.9643	CAGL0B02101g	1
503	GO:0065004	protein-DNA complex assembly	1/217	97/5293	0.9834	1	0.9643	CAGL0F08151g	1
504	GO:0072665	protein localization to vacuole	1/217	97/5293	0.9834	1	0.9643	CAGL0K02761g	1
505	GO:0008654	phospholipid biosynthetic process	1/217	102/5293	0.9866	1	0.9643	CAGL0K02959g	1
506	GO:0007005	mitochondrion organization	4/217	229/5293	0.9869	1	0.9643	CAGL0K10164g/CAGL0G09262g/CAGL0H08261g/CAGL0D05544g	4
507	GO:0022618	ribonucleoprotein complex assembly	1/217	104/5293	0.9877	1	0.9643	CAGL0G09735g	1
508	GO:0006364	rRNA processing	3/217	198/5293	0.9897	1	0.9643	CAGL0H03773g/CAGL0H02937g/CAGL0M06941g	3
509	GO:0006402	mRNA catabolic process	1/217	110/5293	0.9905	1	0.9643	CAGL0D05544g	1
510	GO:0016192	vesicle-mediated transport	7/217	353/5293	0.9922	1	0.9643	CAGL0G04873g/CAGL0G01034g/CAGL0G09735g/CAGL0J01111g/CAGL0K02761g/CAGL0G04895g/CAGL0I02156g	7
511	GO:0006302	double-strand break repair	1/217	116/5293	0.9926	1	0.9643	CAGL0K06127g	1
512	GO:0006310	DNA recombination	2/217	170/5293	0.9939	1	0.9643	CAGL0A01606g/CAGL0K06127g	2
513	GO:0006417	regulation of translation	1/217	126/5293	0.9952	1	0.9643	CAGL0D05544g	1
514	GO:0006913	nucleocytoplasmic transport	2/217	180/5293	0.9958	1	0.9643	CAGL0G00902g/CAGL0M06963g	2
515	GO:0051668	localization within membrane	1/217	130/5293	0.996	1	0.9643	CAGL0G00902g	1
516	GO:0006401	RNA catabolic process	1/217	131/5293	0.9961	1	0.9643	CAGL0D05544g	1
517	GO:0065003	protein-containing complex assembly	8/217	422/5293	0.997	1	0.9643	CAGL0F08151g/CAGL0K09350g/CAGL0M12012g/CAGL0G09262g/CAGL0G09735g/CAGL0G04895g/CAGL0I02156g/CAGL0I10318g	8
518	GO:0000278	mitotic cell cycle	6/217	353/5293	0.9972	1	0.9643	CAGL0D04686g/CAGL0G01034g/CAGL0G09735g/CAGL0J02618g/CAGL0D04642g/CAGL0I10318g	6
519	GO:0006644	phospholipid metabolic process	1/217	140/5293	0.9974	1	0.9643	CAGL0K02959g	1
520	GO:0051726	regulation of cell cycle	4/217	283/5293	0.9978	1	0.9643	CAGL0E03762g/CAGL0J02618g/CAGL0J09328g/CAGL0D04642g	4
521	GO:0016072	rRNA metabolic process	3/217	245/5293	0.998	1	0.9643	CAGL0H03773g/CAGL0H02937g/CAGL0M06941g	3
522	GO:0042254	ribosome biogenesis	4/217	287/5293	0.998	1	0.9643	CAGL0H03773g/CAGL0G09735g/CAGL0H02937g/CAGL0M06941g	4
523	GO:0007346	regulation of mitotic cell cycle	1/217	149/5293	0.9982	1	0.9643	CAGL0J02618g	1
524	GO:0010564	regulation of cell cycle process	3/217	250/5293	0.9984	1	0.9643	CAGL0E03762g/CAGL0J02618g/CAGL0D04642g	3
525	GO:0048193	Golgi vesicle transport	1/217	172/5293	0.9993	1	0.9643	CAGL0J01111g	1
526	GO:0043603	cellular amide metabolic process	6/217	429/5293	0.9998	1	0.9643	CAGL0D04026g/CAGL0G03905g/CAGL0J00473g/CAGL0K12056g/CAGL0D05544g/CAGL0K02739g	6
527	GO:0006605	protein targeting	1/217	202/5293	0.9998	1	0.9643	CAGL0K02761g	1
528	GO:0006396	RNA processing	6/217	438/5293	0.9998	1	0.9643	CAGL0E05676g/CAGL0H03773g/CAGL0J04048g/CAGL0L10934g/CAGL0H02937g/CAGL0M06941g	6
529	GO:0015031	protein transport	4/217	391/5293	1	1	0.9643	CAGL0E06292g/CAGL0G00902g/CAGL0J00715g/CAGL0K02761g	4
530	GO:0006259	DNA metabolic process	5/217	439/5293	1	1	0.9643	CAGL0A01606g/CAGL0F08151g/CAGL0J01529g/CAGL0K06127g/CAGL0D04642g	5
531	GO:0006974	cellular response to DNA damage stimulus	2/217	304/5293	1	1	0.9643	CAGL0K06127g/CAGL0J03960g	2
532	GO:0045184	establishment of protein localization	4/217	407/5293	1	1	0.9643	CAGL0E06292g/CAGL0G00902g/CAGL0J00715g/CAGL0K02761g	4
533	GO:0006412	translation	3/217	360/5293	1	1	0.9643	CAGL0J00473g/CAGL0K12056g/CAGL0D05544g	3
534	GO:0016071	mRNA metabolic process	1/217	260/5293	1	1	0.9643	CAGL0D05544g	1
535	GO:0006281	DNA repair	1/217	263/5293	1	1	0.9643	CAGL0K06127g	1
536	GO:0006886	intracellular protein transport	2/217	353/5293	1	1	0.9643	CAGL0G00902g/CAGL0K02761g	2
