# Supplementary material for: Temporal transcriptional response of Candida glabrata during macrophage infection reveals a multifaceted transcriptional regulator CgXbp1 important for macrophage response and fluconazole resistance
Source: eLife. 2024 Oct 2;13:e73832. doi: 10.7554/eLife.73832 (PMC11554308; doi:10.7554/eLife.73832)
Supplement: Supplementary file 9. [file elife-73832-supp9.xlsx]

## Sheet: Supplementary file 9
Supplementary File 9: Transcription factors with CgXbp1 binding at their promoters during macrophage infection
"-": No common gene names found in Candida glabrata; "N/A": No orthologs found in Saccharomyces cerevisiae
Systematic ORF Name	Common Gene Name	S. cerevisiae Orthologs	S. cerevisiae Common Name	C. glabrata Description	S. cerevisiae Description
CAGL0B04895g	-	YLR176C	RFX1	Ortholog(s) have RNA polymerase II cis-regulatory region sequence-specific DNA binding activity and role in negative regulation of transcription by RNA polymerase II, positive regulation of transcription by RNA polymerase II	Major transcriptional repressor of DNA-damage-regulated genes; recruits repressors Tup1p and Cyc8p to their promoters; involved in DNA damage and replication checkpoint pathway; similar to a family of mammalian DNA binding RFX1-4 proteins
CAGL0D05368g	-	N/A	N/A	Has domain(s) with predicted transcription coregulator activity, role in regulation of transcription by RNA polymerase II and mediator complex localization	N/A
CAGL0E03762g	-	YHL027W	RIM101	Ortholog(s) have DNA-binding transcription repressor activity, RNA polymerase II-specific activity	Cys2His2 zinc-finger transcriptional repressor; involved in alkaline responsive gene repression; involved in cell wall assembly; plays role in lager yeast flocculation under brewing conditions; required for alkaline pH-stimulated haploid invasive growth and sporulation; activated by alkaline-dependent proteolytic processing which results in removal of the C-terminal tail; similar to A. nidulans P…
CAGL0E04312g	-	YHR006W	STP2	Ortholog(s) have DNA-binding transcription activator activity, RNA polymerase II-specific, RNA polymerase II cis-regulatory region sequence-specific DNA binding activity and role in positive regulation of transcription by RNA polymerase II	Transcription factor; activated by proteolytic processing in response to signals from the SPS sensor system for external amino acids; activates transcription of amino acid permease genes; STP2 has a paralog, STP1, that arose from the whole genome duplication
CAGL0E04884g	-	YDR216W	ADR1	Ortholog(s) have DNA-binding transcription factor activity, RNA polymerase II-specific and RNA polymerase II activating transcription factor binding, more	Carbon source-responsive zinc-finger transcription factor; required for transcription of the glucose-repressed gene ADH2, of peroxisomal protein genes, and of genes required for ethanol, glycerol, and fatty acid utilization
CAGL0E06116g	-	YMR182C	RGM1	Ortholog(s) have role in positive regulation of transcription by RNA polymerase II and cytosol, nucleus localization	Putative zinc finger DNA binding transcription factor; contains two N-terminal C2H2 zinc fingers and C-terminal proline rich domain; overproduction impairs cell growth and induces expression of genes involved in monosaccharide catabolism and aldehyde metabolism; regulates expression of of Y' telomeric elements and subtelomeric COS genes; relocalizes to the cytosol in response to hypoxia; RGM1 has…
CAGL0F04081g	TEC2	N/A	N/A	Has domain(s) with predicted DNA-binding transcription factor activity, role in regulation of transcription, DNA-templated and nucleus localization	N/A
CAGL0F08151g	-	YGR246C	BRF1	Ortholog(s) have DNA binding, RNA polymerase III core binding, RNA polymerase III general transcription initiation factor activity and RNA polymerase III type 3 promoter sequence-specific DNA binding, more	TFIIIB B-related factor; one of three subunits of RNA polymerase III transcription initiation factor TFIIIB, binds TFIIIC and TBP and recruits RNA pol III to promoters, amino-terminal half is homologous to TFIIB; mutations in human homolog are associated with autosomal recessive cerebellar-facial-dental syndrome
CAGL0H03751g	-	N/A	N/A	Ortholog(s) have DNA-binding transcription activator activity, RNA polymerase II-specific activity and role in positive regulation of transcription by RNA polymerase II	N/A
CAGL0H06677g	-	YIL154C	IMP21	Ortholog(s) have transcription coactivator activity and role in carbon catabolite regulation of transcription from RNA polymerase II promoter	Transcriptional activator involved in maintenance of ion homeostasis; also involved in protection against DNA damage caused by bleomycin and other oxidants; contains a C-terminal leucine-rich repeat
CAGL0I00902g	-	YMR136W	GAT2	Has domain(s) with predicted DNA-binding transcription factor activity, sequence-specific DNA binding, zinc ion binding activity and role in regulation of transcription, DNA-templated	Protein containing GATA family zinc finger motifs; similar to Gln3p and Dal80p; expression repressed by leucine
CAGL0I04246g	SUT1	YGL162W	SUT1	Putative transcription factor involved in sterol uptake, gene is upregulated in azole-resistant strain	Zn(II)2Cys6 family transcription factor; positively regulates sterol uptake genes under anaerobic conditions; involved in hypoxic gene expression; represses filamentation-inducing genes during vegetative growth; positively regulates mating with SUT2 by repressing expression of genes that act as mating inhibitors; repressed by STE12; relocalizes from the nucleus to the cytoplasm upon DNA replicati…
CAGL0I05060g	-	YER088C	DOT6	Ortholog(s) have sequence-specific DNA binding activity and role in chromatin silencing at telomere, rDNA heterochromatin assembly, regulation of transcription by RNA polymerase II, transfer RNA gene-mediated silencing	Protein involved in rRNA and ribosome biogenesis; activated in stochastic pulses of nuclear localization; binds polymerase A and C motif; subunit of the RPD3L histone deacetylase complex; has chromatin specific SANT domain; involved in telomeric gene silencing and filamentation; relative distribution to the nucleus increases upon DNA replication stress
CAGL0J01529g	-	YMR075W	RCO1	Ortholog(s) have role in histone deacetylation, negative regulation of antisense RNA transcription and positive regulation of transcription by RNA polymerase II, more	Essential component of the Rpd3S histone deacetylase complex; interacts with Eaf3p
CAGL0K01969g	-	N/A	N/A	Has domain(s) with predicted role in transcription by RNA polymerase I	N/A
CAGL0K03003g	-	YMR070W	MOT3	Ortholog(s) have DNA-binding transcription factor activity, RNA polymerase II-specific and RNA polymerase II activating transcription factor binding, more	Transcriptional repressor, activator; role in cellular adjustment to osmotic stress including modulation of mating efficiency; involved in repression of subset of hypoxic genes by Rox1p, repression of several DAN/TIR genes during aerobic growth, ergosterol biosynthetic genes in response to hyperosmotic stress; contributes to recruitment of Tup1p-Cyc8p general repressor to promoters; relocalizes t…
CAGL0L01771g	EFG2	YKL043W	PHD1	Ortholog(s) have DNA-binding transcription factor activity, role in positive regulation of pseudohyphal growth, positive regulation of transcription by RNA polymerase II and nucleus localization	Transcriptional activator that enhances pseudohyphal growth; physically interacts with the Tup1-Cyc8 complex and recruits Tup1p to its targets; regulates expression of FLO11, an adhesin required for pseudohyphal filament formation; similar to StuA, an A. nidulans developmental regulator; potential Cdc28p substrate; PHD1 has a paralog, SOK2, that arose from the whole genome duplication
CAGL0E05566g	-	YOR344C	TYE7	Ortholog(s) have DNA-binding transcription factor activity and role in positive regulation of glycolytic process, transcription elongation from RNA polymerase II promoter	Serine-rich protein that contains a bHLH DNA binding motif; binds E-boxes of glycolytic genes and contributes to their activation; may function as a transcriptional activator in Ty1-mediated gene expression; bHLH stands for basic-helix-loop-helix
CAGL0G08646g	-	YIL122W	POG1	Ortholog(s) have RNA polymerase II cis-regulatory region sequence-specific DNA binding activity and role in positive regulation of transcription by RNA polymerase II, re-entry into mitotic cell cycle after pheromone arrest	DNA-binding transcriptional activator; involved in cell cycle regulation; overexpression promotes recovery from pheromone induced arrest via CLN1/2 transcription, induction of of IME1 during sporulation, and suppression of stress sensitivity resulting from mutation of the E3 ubiquitin ligase Rsp5p; binds upstream of BAR1 and cell cycle-related genes; phosphorylated form may be ubiquitinated by Dm…
CAGL0H00396g	-	YLR451W	LEU3	Ortholog(s) have DNA-binding transcription activator activity, RNA polymerase II-specific, DNA-binding transcription repressor activity, RNA polymerase II-specific activity	Zinc-knuckle transcription factor, repressor and activator; regulates genes involved in branched chain amino acid biosynthesis and ammonia assimilation; acts as a repressor in leucine-replete conditions and as an activator in the presence of alpha-isopropylmalate, an intermediate in leucine biosynthesis that accumulates during leucine starvation
CAGL0H02145g	-	YHR084W	STE12	Ortholog(s) have DNA-binding transcription factor activity	Transcription factor that is activated by a MAPK signaling cascade; activates genes involved in mating or pseudohyphal/invasive growth pathways; cooperates with Tec1p transcription factor to regulate genes specific for invasive growth
CAGL0I04180g	AMT1	YGL166W	CUP2	Metal-activated transcription factor, binds promoters of metallothionein genes, autoregulates its own expression, gene is downregulated in azole-resistant strain	Copper-binding transcription factor; activates transcription of the metallothionein genes CUP1-1 and CUP1-2 in response to elevated copper concentrations; required for regulation of copper genes in response to DNA-damaging reagents; CUP2 has a paralog, HAA1, that arose from the whole genome duplication
CAGL0J03960g	-	YOR229W	WTM2	Ortholog(s) have DNA-binding transcription factor activity, RNA polymerase II-specific, transcription corepressor activity	Transcriptional modulator; involved in regulation of meiosis, silencing, and expression of RNR genes; involved in response to replication stress; contains WD repeats; relocalizes to the cytosol in response to hypoxia; WTM2 has a paralog, UME1, that arose from the whole genome duplication
CAGL0F01837g	SPT8	YLR055C	SPT8	Ortholog(s) have TBP-class protein binding, transcription coregulator activity	Subunit of the SAGA transcriptional regulatory complex; not present in SAGA-like complex SLIK/SALSA; required for SAGA-mediated inhibition at some promoters
CAGL0A01628g	MIG1	YGL035C	MIG1	Transcriptional regulatory protein	Transcription factor involved in glucose repression; sequence specific DNA binding protein containing two Cys2His2 zinc finger motifs; regulated by the SNF1 kinase and the GLC7 phosphatase; regulates filamentous growth along with Mig2p in response to glucose depletion; activated in stochastic pulses of nuclear localization, shuttling between cytosol and nucleus depending on external glucose level…
CAGL0C00759g	-	YLR223C	IFH1	Ortholog(s) have transcription coactivator activity, role in chromatin silencing at telomere, positive regulation of ribosomal protein gene transcription by RNA polymerase II and CURI complex, nucleolus, nucleus localization	Coactivator, regulates transcription of ribosomal protein (RP) genes; recruited to RP gene promoters during optimal growth conditions via Fhl1p; subunit of CURI, a complex that coordinates RP production and pre-rRNA processing; regulated by acetylation and phosphorylation at different growth states via TORC1 signaling; IFH1 has a paralog, CRF1, that arose from the whole genome duplication
CAGL0A01606g	-	YGL033W	HOP2	Ortholog(s) have double-stranded DNA binding activity, role in homologous chromosome pairing at meiosis, reciprocal meiotic recombination and condensed nuclear chromosome localization	Meiosis-specific protein that localizes to chromosomes; prevents synapsis between nonhomologous chromosomes and ensures synapsis between homologs; forms complex with Mnd1p to promote homolog pairing and meiotic double-strand break repair; heterodimer of Hop2p-Mnd1p stimulates the Dmc1p-mediated strand invasion
