# Supplementary material for: Temporal transcriptional response of Candida glabrata during macrophage infection reveals a multifaceted transcriptional regulator CgXbp1 important for macrophage response and fluconazole resistance
Source: eLife. 2024 Oct 2;13:e73832. doi: 10.7554/eLife.73832 (PMC11554308; doi:10.7554/eLife.73832)
Supplement: Supplementary file 11. [file elife-73832-supp11.xlsx]

## Sheet: Group 1
Supplementary File 11: List of GO-terms enriched from temporally induced genes in Cgxbp1∆ in response to macrophage infection
	GO-Term enrichment employing Candida genome database
GOID	GO_term	Cluster frequency	Background frequency	Corrected P-value	False discovery rate	Gene(s) annotated to the term	Directly Annotated GOID List
55114	oxidation-reduction process	83 out of 377 genes, 22.0%	277 out of 5615 background genes, 4.9%	1.62e-31	0	CAGL0A01045g:CAGL0A04433g:HIS4:CAGL0B02431g:ILV5:CAGL0B04323g:CAGL0B04917g:CAGL0C01325g:GPX2:CAGL0C02623g:CAGL0C03223g:LYS9:CAGL0C04191g:CAGL0C04543g:SOD1:CAGL0D00748g:IDP1:TKL1:CAGL0D01958g:CAGL0D05192g:ACO1:ALD4:CAGL0E01287g:CAGL0E01705g:CAGL0E03850g:CAGL0E04356g:CAGL0E06424g:PRO2:IRC15:CAGL0F02255g:ACO2:CAGL0F04213g:CAGL0F04565g:CAGL0F04719g:CAGL0F05863g:MET13:CAGL0F07513g:CAGL0F07777g:LYS12:I…	9060:32516:5975:61610:90344:1320:6635:44262:51156:6598:6099:140021:6801:97250:1901856:55085:9061:46356:19878:45454:6078:6882:6116:6102:5978:6123:61077:6067:6111:55114:8615:6520:16558:6537:1903457:6094:1324:77:50821:6553:15867:6540:8152:1900180:6807:6873:9085:6740:19413:31505:6072:19654:19255:6085:6915:9082:6011:46686:15866:6090:15886:35308:19568:6122:42744:45333:6101:6457:7094:1990544:2:5977:3251…
15980	energy derivation by oxidation of organic compounds	46 out of 377 genes, 12.2%	94 out of 5615 background genes, 1.7%	6.75e-27	0	CAGL0A01045g:CAGL0B02431g:CAGL0C01325g:CAGL0C02623g:CAGL0C03223g:CAGL0D00748g:CAGL0D01958g:CAGL0D05192g:ACO1:CAGL0E01287g:CAGL0E01705g:CAGL0E03850g:CAGL0F02255g:ACO2:CAGL0F04213g:CAGL0F04565g:CAGL0F04719g:CAGL0F05863g:CAGL0F07513g:IDH1:CAGL0G08712g:CAGL0G10131g:CAGL0G10153g:CAGL0H02491g:CAGL0H02695g:CAGL0H03993g:CAGL0H09328g:CYC1:RIP1:CAGL0I06270g:IDH2:COX6:CAGL0J00847g:CAGL0J02904g:CAGL0J03080g:…	9060:32516:5975:6635:44262:51156:6099:140021:97250:55085:9061:46356:6078:6102:6116:5978:6123:55114:16558:6094:15867:8152:1900180:6873:19654:19255:6085:6915:6011:15866:15886:35308:6122:45333:6101:7094:1990544:5977:2:32515:6112:6120:45039:32543:22900:19388:34551:6735:30003:43065:6103:6470:1302:16573:5992:6106:19427:6874:6108:42775:6839
6091	generation of precursor metabolites and energy	51 out of 377 genes, 13.5%	127 out of 5615 background genes, 2.3%	6.12e-25	0	CAGL0A01045g:CAGL0A04829g:CAGL0B02431g:CAGL0C01325g:CAGL0C02623g:CAGL0C03223g:CAGL0D00748g:TKL1:CAGL0D01958g:CAGL0D05192g:ACO1:ALD4:CAGL0E01287g:CAGL0E01705g:CAGL0E03850g:CAGL0F02255g:ACO2:CAGL0F04213g:CAGL0F04565g:CAGL0F04719g:CAGL0F05863g:CAGL0F07513g:IDH1:CAGL0G08712g:CAGL0G10131g:CAGL0G10153g:CAGL0H02491g:CAGL0H02695g:CAGL0H03993g:CAGL0H09328g:CYC1:RIP1:CAGL0I06270g:IDH2:COX6:CAGL0J00847g:CAG…	6096:9060:6006:32516:5975:6635:44262:51156:6099:140021:6013:97250:6002:55085:9061:46356:6078:6102:6116:5978:6123:6067:55114:16558:6094:15867:8152:1900180:6873:6740:19413:19654:19255:6085:6915:6011:15866:6090:15886:35308:6122:45333:6101:7094:1990544:46323:5977:2:32515:6112:6120:6000:45039:32543:22900:19388:34551:6735:30003:43065:6103:34599:6470:1302:16573:5992:6098:32445:6106:6409:46835:1678:19427…
45333	cellular respiration	36 out of 377 genes, 9.5%	69 out of 5615 background genes, 1.2%	8.26e-22	0	CAGL0A01045g:CAGL0B02431g:CAGL0C01325g:CAGL0C02623g:CAGL0C03223g:CAGL0D00748g:CAGL0D01958g:CAGL0D05192g:ACO1:CAGL0E01287g:CAGL0E01705g:CAGL0E03850g:ACO2:CAGL0F04213g:CAGL0F04565g:CAGL0F05863g:CAGL0F07513g:IDH1:CAGL0G08712g:CAGL0G10131g:CAGL0G10153g:CAGL0H02491g:CAGL0H03993g:CAGL0H09328g:CYC1:RIP1:CAGL0I06270g:IDH2:COX6:CAGL0J00847g:CAGL0K02893g:MDH1:CAGL0L06160g:CAGL0L06204g:CAGL0L06798g:CYT1	9060:5975:6635:44262:6099:140021:97250:55085:9061:46356:6102:6116:6123:55114:16558:6094:15867:8152:6915:15866:15886:6122:45333:6101:1990544:2:6120:45039:32543:22900:34551:6735:43065:6103:1302:6106:6108:42775:6839
9060	aerobic respiration	32 out of 377 genes, 8.5%	59 out of 5615 background genes, 1.1%	7.52e-20	0	CAGL0A01045g:CAGL0C01325g:CAGL0C02623g:CAGL0C03223g:CAGL0D00748g:CAGL0D01958g:CAGL0D05192g:ACO1:CAGL0E01287g:CAGL0E01705g:CAGL0E03850g:ACO2:CAGL0F04213g:CAGL0F04565g:CAGL0F07513g:IDH1:CAGL0G08712g:CAGL0G10131g:CAGL0H02491g:CAGL0H03993g:CAGL0H09328g:CYC1:RIP1:CAGL0I06270g:IDH2:COX6:CAGL0J00847g:CAGL0K02893g:MDH1:CAGL0L06160g:CAGL0L06204g:CAGL0L06798g	9060:5975:6635:44262:6099:140021:97250:55085:9061:46356:6102:6123:55114:16558:6094:15867:8152:6915:15866:15886:6122:45333:6101:1990544:2:45039:32543:22900:34551:6735:6103:1302:6106:6108:42775:6839
44281	small molecule metabolic process	95 out of 377 genes, 25.2%	557 out of 5615 background genes, 9.9%	3.68e-16	0	CAGL0A00363g:CAGL0A01045g:CAGL0A01111g:CAGL0A01716g:CAGL0A02574g:CAGL0A03036g:ARO10:CAGL0A04829g:HIS4:ILV5:CAGL0B03465g:CAGL0B04543g:CAGL0B04917g:CAGL0C01243g:CAGL0C01397g:CAGL0C01573g:CAGL0C01595g:PHM8:LYS9:CAGL0C04191g:CAGL0C04543g:CAGL0C05027g:IDP1:CAGL0D01892g:PRO1:CAGL0D04026g:ALD4:CAGL0E01287g:CAGL0E01705g:CAGL0E03916g:CAGL0E06380g:CAGL0E06424g:PRO2:CAGL0F06875g:PYC1:MET13:CAGL0F07777g:ARO8…	6096:6974:6006:9437:44262:6598:6084:9102:6002:6281:19679:55085:6116:6399:6102:15741:9097:70791:19346:6067:8615:6520:6559:106035:6241:6553:1207:6807:9085:6165:6740:6114:15976:19255:16226:9082:6090:42407:19358:19629:19265:2:6071:6003:19676:43605:71470:6561:46148:6696:9450:71266:19483:42843:6735:30003:6228:19541:34599:6104:16573:42761:32445:950:46835:1678:6730:19427:1900832:6569:61508:9060:46496:597…
19752	carboxylic acid metabolic process	64 out of 377 genes, 17.0%	315 out of 5615 background genes, 5.6%	1.15e-13	0	CAGL0A00363g:CAGL0A01045g:CAGL0A02574g:ARO10:CAGL0A04829g:HIS4:ILV5:CAGL0B04543g:CAGL0B04917g:CAGL0C01243g:CAGL0C01573g:CAGL0C01595g:LYS9:CAGL0C04191g:CAGL0C05027g:IDP1:CAGL0D01892g:PRO1:CAGL0D04026g:ALD4:CAGL0E01287g:CAGL0E01705g:PRO2:CAGL0F06875g:PYC1:MET13:CAGL0F07777g:ARO8:LYS12:IDH1:CAGL0G03905g:CAGL0G05610g:GDH2:CAGL0G06732g:CAGL0H02585g:LEU2:CAGL0H03905g:CAGL0H03993g:ARO3:DLD1:IDH2:PRO3:HO…	6096:6006:9437:44262:6598:6084:9102:6002:6281:19679:55085:6399:6102:15741:9097:70791:19346:6067:6520:6559:106035:6553:1207:6807:9085:6740:15976:16226:9082:6090:19629:19265:2:19676:43605:71470:6561:46148:9450:71266:19483:6735:19541:34599:16573:42761:32445:950:46835:1678:6730:19427:1900832:6569:9060:5975:6635:6542:97428:162:9073:15744:51156:6099:6631:6013:46356:19878:55114:16558:6537:9062:1903457:6…
43436	oxoacid metabolic process	64 out of 377 genes, 17.0%	325 out of 5615 background genes, 5.8%	5.92e-13	0	CAGL0A00363g:CAGL0A01045g:CAGL0A02574g:ARO10:CAGL0A04829g:HIS4:ILV5:CAGL0B04543g:CAGL0B04917g:CAGL0C01243g:CAGL0C01573g:CAGL0C01595g:LYS9:CAGL0C04191g:CAGL0C05027g:IDP1:CAGL0D01892g:PRO1:CAGL0D04026g:ALD4:CAGL0E01287g:CAGL0E01705g:PRO2:CAGL0F06875g:PYC1:MET13:CAGL0F07777g:ARO8:LYS12:IDH1:CAGL0G03905g:CAGL0G05610g:GDH2:CAGL0G06732g:CAGL0H02585g:LEU2:CAGL0H03905g:CAGL0H03993g:ARO3:DLD1:IDH2:PRO3:HO…	6096:6006:9437:44262:6598:6084:9102:6002:6281:19679:55085:6399:6102:15741:9097:70791:19346:6067:6520:6559:106035:6553:1207:6807:9085:6740:15976:16226:9082:6090:19629:19265:2:19676:43605:71470:6561:46148:9450:71266:19483:6735:19541:34599:16573:42761:32445:950:46835:1678:6730:19427:1900832:6569:9060:5975:6635:6542:97428:162:9073:15744:51156:6099:6631:6013:46356:19878:55114:16558:6537:9062:1903457:6…
6082	organic acid metabolic process	64 out of 377 genes, 17.0%	326 out of 5615 background genes, 5.8%	6.94e-13	0	CAGL0A00363g:CAGL0A01045g:CAGL0A02574g:ARO10:CAGL0A04829g:HIS4:ILV5:CAGL0B04543g:CAGL0B04917g:CAGL0C01243g:CAGL0C01573g:CAGL0C01595g:LYS9:CAGL0C04191g:CAGL0C05027g:IDP1:CAGL0D01892g:PRO1:CAGL0D04026g:ALD4:CAGL0E01287g:CAGL0E01705g:PRO2:CAGL0F06875g:PYC1:MET13:CAGL0F07777g:ARO8:LYS12:IDH1:CAGL0G03905g:CAGL0G05610g:GDH2:CAGL0G06732g:CAGL0H02585g:LEU2:CAGL0H03905g:CAGL0H03993g:ARO3:DLD1:IDH2:PRO3:HO…	6096:6006:9437:44262:6598:6084:9102:6002:6281:19679:55085:6399:6102:15741:9097:70791:19346:6067:6520:6559:106035:6553:1207:6807:9085:6740:15976:16226:9082:6090:19629:19265:2:19676:43605:71470:6561:46148:9450:71266:19483:6735:19541:34599:16573:42761:32445:950:46835:1678:6730:19427:1900832:6569:9060:5975:6635:6542:97428:162:9073:15744:51156:6099:6631:6013:46356:19878:55114:16558:6537:9062:1903457:6…
8652	cellular amino acid biosynthetic process	33 out of 377 genes, 8.8%	97 out of 5615 background genes, 1.7%	8.48e-13	0	CAGL0A00363g:CAGL0A02574g:HIS4:ILV5:CAGL0C01243g:CAGL0C01573g:CAGL0C01595g:LYS9:IDP1:CAGL0D01892g:PRO1:PRO2:CAGL0F06875g:MET13:CAGL0F07777g:LYS12:CAGL0G06732g:LEU2:CAGL0H03905g:ARO3:PRO3:HOM3:CAGL0J06402g:LYS21:CAGL0K03465g:GLN1:CAGL0K07788g:CAGL0K10978g:CAGL0K12518g:HIS1:HIS3:STR3:CAGL0L12254g	6598:6281:6102:9097:70791:19346:6553:1207:6807:9085:9082:19265:2:19676:71470:6561:71266:19483:6730:6542:162:9073:19878:55114:6537:9088:10045:9058:6523:6524:9099:9086:8652:105:9098:71585:6532:9090
22900	electron transport chain	17 out of 377 genes, 4.5%	24 out of 5615 background genes, 0.4%	1.82e-12	0	CAGL0B02431g:CAGL0C01325g:CAGL0C02623g:CAGL0D00748g:CAGL0D05192g:CAGL0G10131g:CAGL0G10153g:CAGL0H02491g:CAGL0H09328g:CYC1:RIP1:CAGL0I06270g:COX6:CAGL0J00847g:CAGL0K02893g:CAGL0L06160g:CYT1	6116:6123:34551:9060:6099:6122:45333:6120:22900:43065:42775
6099	tricarboxylic acid cycle	15 out of 377 genes, 4.0%	19 out of 5615 background genes, 0.3%	5.93e-12	0	CAGL0A01045g:CAGL0C03223g:CAGL0D01958g:ACO1:CAGL0E01287g:CAGL0E01705g:CAGL0E03850g:ACO2:IDH1:CAGL0G08712g:CAGL0H03993g:IDH2:CAGL0J00847g:MDH1:CAGL0L06798g	44262:6102:8152:2:32543:6735:9060:5975:6635:6099:46356:55114:16558:6094:45333:6101:45039:22900:6103:1302:6106:6108
42773	ATP synthesis coupled electron transport	16 out of 377 genes, 4.2%	22 out of 5615 background genes, 0.4%	6.51e-12	0	CAGL0B02431g:CAGL0C01325g:CAGL0C02623g:CAGL0D00748g:CAGL0D05192g:CAGL0G10131g:CAGL0G10153g:CAGL0H02491g:CAGL0H09328g:CYC1:RIP1:CAGL0I06270g:COX6:CAGL0K02893g:CAGL0L06160g:CYT1	6116:6123:34551:9060:6122:6120:43065:42775
42775	mitochondrial ATP synthesis coupled electron transport	16 out of 377 genes, 4.2%	22 out of 5615 background genes, 0.4%	6.51e-12	0	CAGL0B02431g:CAGL0C01325g:CAGL0C02623g:CAGL0D00748g:CAGL0D05192g:CAGL0G10131g:CAGL0G10153g:CAGL0H02491g:CAGL0H09328g:CYC1:RIP1:CAGL0I06270g:COX6:CAGL0K02893g:CAGL0L06160g:CYT1	6116:6123:34551:9060:6122:6120:43065:42775
1901605	alpha-amino acid metabolic process	34 out of 377 genes, 9.0%	112 out of 5615 background genes, 2.0%	1.49e-11	0	CAGL0A00363g:CAGL0A02574g:ARO10:HIS4:CAGL0C01243g:CAGL0C01595g:LYS9:CAGL0C04191g:IDP1:CAGL0D01892g:PRO1:CAGL0D04026g:PRO2:CAGL0F06875g:MET13:ARO8:LYS12:CAGL0G05610g:CAGL0G06732g:CAGL0H02585g:LEU2:PRO3:HOM3:CAGL0J06402g:LYS21:CAGL0K03465g:GLN1:CAGL0K07788g:CAGL0K10978g:CAGL0K12518g:HIS1:HIS3:STR3:CAGL0L12254g	6281:6399:6102:9097:70791:19346:6559:6553:1207:6807:9085:9082:19265:19676:43605:71470:6561:46148:9450:71266:34599:950:6730:1900832:6569:6542:162:19878:55114:6537:9088:6540:6552:949:6536:10045:6538:9058:6523:6524:9099:9086:8652:105:9098:951:71585:1900829:6532:9090:19558
46034	ATP metabolic process	26 out of 377 genes, 6.9%	66 out of 5615 background genes, 1.2%	1.9e-11	0	CAGL0A01111g:CAGL0A03036g:CAGL0A04829g:CAGL0B02431g:CAGL0C01325g:CAGL0C02623g:CAGL0D00748g:CAGL0D05192g:CAGL0G10131g:CAGL0G10153g:CAGL0H01397g:CAGL0H02491g:CAGL0H05489g:CAGL0H07023g:CAGL0H09328g:CAGL0I00572g:CYC1:RIP1:CAGL0I04686g:CAGL0I06270g:CAGL0I07969g:COX6:CAGL0K02409g:CAGL0K02893g:CAGL0L06160g:CYT1	6096:6006:6002:6116:6123:42407:34551:32445:46835:1678:9060:51156:6013:15986:6122:46323:6120:6000:65003:43065:33615:42775
22904	respiratory electron transport chain	16 out of 377 genes, 4.2%	23 out of 5615 background genes, 0.4%	2e-11	0	CAGL0B02431g:CAGL0C01325g:CAGL0C02623g:CAGL0D00748g:CAGL0D05192g:CAGL0G10131g:CAGL0G10153g:CAGL0H02491g:CAGL0H09328g:CYC1:RIP1:CAGL0I06270g:COX6:CAGL0K02893g:CAGL0L06160g:CYT1	6116:6123:34551:9060:6122:6120:43065:42775
6119	oxidative phosphorylation	16 out of 377 genes, 4.2%	24 out of 5615 background genes, 0.4%	5.66e-11	0	CAGL0B02431g:CAGL0C01325g:CAGL0C02623g:CAGL0D00748g:CAGL0D05192g:CAGL0G10131g:CAGL0G10153g:CAGL0H02491g:CAGL0H09328g:CYC1:RIP1:CAGL0I06270g:COX6:CAGL0K02893g:CAGL0L06160g:CYT1	6116:6123:34551:9060:6122:6120:43065:42775
1901607	alpha-amino acid biosynthetic process	28 out of 377 genes, 7.4%	85 out of 5615 background genes, 1.5%	3.59e-10	0	CAGL0A00363g:CAGL0A02574g:HIS4:CAGL0C01243g:CAGL0C01595g:LYS9:IDP1:CAGL0D01892g:PRO1:PRO2:CAGL0F06875g:MET13:LYS12:CAGL0G06732g:LEU2:PRO3:HOM3:CAGL0J06402g:LYS21:CAGL0K03465g:GLN1:CAGL0K07788g:CAGL0K10978g:CAGL0K12518g:HIS1:HIS3:STR3:CAGL0L12254g	6281:6102:9097:70791:19346:6553:1207:6807:9085:9082:19265:19676:71470:6561:71266:6730:6542:162:19878:55114:6537:9088:10045:6523:6524:9099:9086:8652:105:9098:71585:6532:9090
6520	cellular amino acid metabolic process	40 out of 377 genes, 10.6%	178 out of 5615 background genes, 3.2%	3.78e-09	0	CAGL0A00363g:CAGL0A02574g:ARO10:HIS4:ILV5:CAGL0C01243g:CAGL0C01573g:CAGL0C01595g:LYS9:CAGL0C04191g:IDP1:CAGL0D01892g:PRO1:CAGL0D04026g:PRO2:CAGL0F06875g:MET13:CAGL0F07777g:ARO8:LYS12:CAGL0G05610g:GDH2:CAGL0G06732g:CAGL0H02585g:LEU2:CAGL0H03905g:ARO3:PRO3:HOM3:CAGL0J06402g:LYS21:CAGL0K03465g:GLN1:CAGL0K07788g:CAGL0K10978g:CAGL0K12518g:HIS1:HIS3:STR3:CAGL0L12254g	6598:6281:6399:6102:9097:70791:19346:6520:6559:6553:1207:6807:9085:9082:19265:2:19676:43605:71470:6561:46148:9450:71266:19483:34599:950:6730:1900832:6569:6542:162:9073:19878:55114:6537:9088:6540:6552:949:6536:10045:6538:9058:6523:6524:9099:9086:8652:105:9098:951:71585:1900829:6532:9090:19558
16053	organic acid biosynthetic process	36 out of 377 genes, 9.5%	148 out of 5615 background genes, 2.6%	4.09e-09	0	CAGL0A00363g:CAGL0A02574g:HIS4:ILV5:CAGL0C01243g:CAGL0C01573g:CAGL0C01595g:LYS9:IDP1:CAGL0D01892g:PRO1:ALD4:PRO2:CAGL0F06875g:MET13:CAGL0F07777g:LYS12:CAGL0G03905g:CAGL0G06732g:LEU2:CAGL0H03905g:ARO3:PRO3:HOM3:CAGL0J06402g:LYS21:CAGL0K03465g:CAGL0K04125g:GLN1:CAGL0K07788g:CAGL0K10978g:CAGL0K12518g:HIS1:HIS3:STR3:CAGL0L12254g	6598:9102:6281:6102:9097:70791:19346:6067:106035:6553:1207:6807:9085:6740:16226:9082:6090:19265:2:19676:71470:6561:71266:19483:42761:6730:6542:97428:162:9073:19878:55114:6537:9088:19413:10045:9058:6523:6524:9099:9086:8652:105:9098:71585:6532:9090
46394	carboxylic acid biosynthetic process	36 out of 377 genes, 9.5%	148 out of 5615 background genes, 2.6%	4.09e-09	0	CAGL0A00363g:CAGL0A02574g:HIS4:ILV5:CAGL0C01243g:CAGL0C01573g:CAGL0C01595g:LYS9:IDP1:CAGL0D01892g:PRO1:ALD4:PRO2:CAGL0F06875g:MET13:CAGL0F07777g:LYS12:CAGL0G03905g:CAGL0G06732g:LEU2:CAGL0H03905g:ARO3:PRO3:HOM3:CAGL0J06402g:LYS21:CAGL0K03465g:CAGL0K04125g:GLN1:CAGL0K07788g:CAGL0K10978g:CAGL0K12518g:HIS1:HIS3:STR3:CAGL0L12254g	6598:9102:6281:6102:9097:70791:19346:6067:106035:6553:1207:6807:9085:6740:16226:9082:6090:19265:2:19676:71470:6561:71266:19483:42761:6730:6542:97428:162:9073:19878:55114:6537:9088:19413:10045:9058:6523:6524:9099:9086:8652:105:9098:71585:6532:9090
5975	carbohydrate metabolic process	36 out of 377 genes, 9.5%	158 out of 5615 background genes, 2.8%	3.18e-08	0	CAGL0A04829g:KRE9:CAGL0C01397g:CAGL0C04543g:CAGL0E01705g:CAGL0E03916g:GLK1:CAGL0F02255g:GAS4:CAGL0F04719g:PYC1:CAGL0G03883g:CAGL0G09020g:CAGL0G09064g:CAGL0H02387g:CAGL0H02695g:CAGL0H03993g:CAGL0H04939g:CAGL0H06633g:CAGL0H06699g:GCY1:GRE3:FBP26:CAGL0J02904g:ICL1:TPS1:GPD1:CAGL0K03421g:CAGL0K04235g:PGM1:UGP1:CAGL0L03982g:MDH1:CAGL0L06798g:CAGL0M10439g:CAGL0M10956g	6096:43936:6006:19538:44262:6002:6116:6468:34605:43455:1900180:1900760:6114:15976:19255:9847:6090:7094:70413:19933:34975:5977:32515:6077:46827:6071:6003:71470:51085:42026:42843:6735:5993:30003:45721:35617:34599:46168:71218:6098:32445:10515:46835:1678:45014:2000766:9060:32516:61610:5975:6635:433:6099:51156:6013:46356:6078:5978:71852:1319:55114:70370:16558:9062:6094:45733:42546:6873:31505:10607:607…
44283	small molecule biosynthetic process	47 out of 377 genes, 12.5%	253 out of 5615 background genes, 4.5%	5.99e-08	0	CAGL0A00363g:CAGL0A02574g:ARO10:HIS4:ILV5:CAGL0C01243g:CAGL0C01573g:CAGL0C01595g:PHM8:LYS9:IDP1:CAGL0D01892g:PRO1:ALD4:CAGL0E01705g:CAGL0E06424g:PRO2:CAGL0F06875g:PYC1:MET13:CAGL0F07777g:LYS12:CAGL0G03905g:CAGL0G06732g:CAGL0G09064g:LEU2:CAGL0H03905g:CAGL0H03993g:CAGL0H04939g:CAGL0H06633g:ARO3:PDX3:PRO3:HOM3:CAGL0J06402g:LYS21:CAGL0K03465g:CAGL0K04125g:GLN1:CAGL0K07788g:CAGL0K10978g:CAGL0K12518g:H…	6974:44262:6598:9102:6281:6102:9097:70791:19346:6067:8615:6559:106035:6241:6553:1207:6807:9085:6165:6740:6114:15976:16226:9082:6090:19265:2:19676:71470:6561:6696:71266:19483:6228:34599:42761:950:6730:6569:61508:6542:97428:162:9073:6099:46356:19878:90549:9166:55114:16558:6537:70328:6094:9088:6552:19413:949:51211:10045:6101:9058:6523:6183:6524:9099:9086:8652:105:9098:9142:951:71585:6532:6108:72593:…
6122	mitochondrial electron transport, ubiquinol to cytochrome c	9 out of 377 genes, 2.4%	11 out of 5615 background genes, 0.2%	1.24e-06	0	CAGL0D05192g:CAGL0G10131g:CAGL0G10153g:CAGL0H09328g:CYC1:RIP1:CAGL0I06270g:CAGL0K02893g:CYT1	6123:34551:9060:6122:42775
44262	cellular carbohydrate metabolic process	21 out of 377 genes, 5.6%	79 out of 5615 background genes, 1.4%	2.7e-05	0	CAGL0A04829g:KRE9:CAGL0E03916g:CAGL0F02255g:CAGL0F04719g:CAGL0G03883g:CAGL0G09020g:CAGL0G09064g:CAGL0H02387g:CAGL0H02695g:CAGL0H03993g:CAGL0H06699g:GCY1:CAGL0J02904g:ICL1:TPS1:CAGL0K03421g:PGM1:UGP1:CAGL0L03982g:CAGL0M10439g	6096:43936:6006:19538:44262:6002:6116:6468:34605:43455:1900180:1900760:6114:15976:19255:9847:7094:70413:19933:34975:5977:32515:6077:46827:6071:71470:42843:51085:42026:5993:30003:45721:35617:34599:71218:32445:10515:46835:1678:45014:2000766:32516:61610:433:6099:51156:6013:46356:6078:5978:71852:55114:1319:70370:9062:45733:42546:6873:31505:10607:6072:43335:6011:30437:19568:35308:70414:6101:7186:46323…
6083	acetate metabolic process	9 out of 377 genes, 2.4%	14 out of 5615 background genes, 0.2%	3.76e-05	0	CAGL0B04543g:CAGL0C05027g:ALD4:ICL1:CAGL0J04268g:CAGL0J11836g:CAGL0L00649g:CAGL0L03982g:CAGL0M09020g	9437:6084:19679:55085:15741:6067:6740:15976:6090:16573:19427:15744:6631:9062:45733:19413:19654:6083:6085:15879:6097
44282	small molecule catabolic process	21 out of 377 genes, 5.6%	87 out of 5615 background genes, 1.5%	0.00016	0	ARO10:CAGL0B04543g:CAGL0C04191g:CAGL0C04543g:CAGL0C05027g:CAGL0D04026g:ARO8:CAGL0G05610g:CAGL0H02585g:GCY1:GRE3:DLD1:ICL1:CAGL0J11836g:CAGL0K03421g:PGM1:CAGL0L03982g:CAGL0L06798g:CAGL0L09108g:CAGL0L12254g:CAGL0M09020g	9437:55085:6399:15741:6559:15976:19255:19629:43605:71470:46148:9450:42843:6735:30003:19541:34599:950:1900832:6569:5975:61610:6635:15744:6099:51156:6631:5978:55114:9062:1903457:45733:6540:6552:949:6011:19568:6536:15879:6538:9058:6523:19388:6524:6097:5992:951:1900829:6874:19543:6108:19558
42407	cristae formation	7 out of 377 genes, 1.9%	9 out of 5615 background genes, 0.2%	0.00018	0	CAGL0B00396g:CAGL0G06600g:CAGL0G08195g:CAGL0H07023g:CAGL0I00572g:CAGL0I09262g:CAGL0K02409g	2001246:15914:42407:61024:15986:32048:34622:43933:65003:46337:33615
6553	lysine metabolic process	7 out of 377 genes, 1.9%	9 out of 5615 background genes, 0.2%	0.00018	0	LYS9:CAGL0F06875g:LYS12:CAGL0J06402g:LYS21:CAGL0K07788g:CAGL0K10978g	6281:6553:1207:9085:19878:55114
9085	lysine biosynthetic process	7 out of 377 genes, 1.9%	9 out of 5615 background genes, 0.2%	0.00018	0	LYS9:CAGL0F06875g:LYS12:CAGL0J06402g:LYS21:CAGL0K07788g:CAGL0K10978g	6281:6553:1207:9085:19878:55114
43648	dicarboxylic acid metabolic process	12 out of 377 genes, 3.2%	30 out of 5615 background genes, 0.5%	0.0002	0	CAGL0A01045g:CAGL0C04191g:IDP1:CAGL0D01892g:CAGL0D04026g:CAGL0E01287g:CAGL0E01705g:ARO8:CAGL0H02585g:GLN1:MDH1:CAGL0L06798g	6102:6807:19676:43605:71470:46148:9450:6735:34599:9060:5975:6635:6542:6099:55114:16558:6537:6094:6540:6536:6538:9058:6103:1302:6106:6532:6108:19558
55085	transmembrane transport	44 out of 377 genes, 11.7%	297 out of 5615 background genes, 5.3%	0.00032	0	CAGL0A01111g:DIP5:HXT5:CAGL0A03036g:CAGL0A04829g:CAGL0C00539g:FPS1:AQY1:CAGL0D02640g:CAGL0D02662g:CAGL0D03520g:CAGL0D04708g:CAGL0E01705g:CAGL0E02035g:CAGL0E05632g:CAGL0F00209g:CAGL0F00231g:PDH1:CAGL0F04213g:CAGL0F08085g:CAGL0H01397g:CAGL0H03333g:CAGL0H05489g:CAGL0H07023g:HSP10:CAGL0I00572g:CAGL0I01496g:PEX21B:CAGL0I04686g:CAGL0I07969g:CAGL0J02002g:CAGL0J04114g:CAGL0J09306g:GPD1:CAGL0K02409g:CAGL0…	6096:6006:19740:6002:6843:55085:9061:6116:15741:51180:6847:8272:15867:15812:6816:15976:42407:15886:1990544:2:33554:1904659:15824:6846:15804:42026:15793:46168:1902269:32445:747:1990961:46835:6865:1678:45041:15700:9060:5975:51131:70778:35434:15677:15744:6099:51156:15813:140021:6013:6842:15986:55114:15851:16558:9062:6094:45733:34659:30150:6072:43335:6915:15866:35352:6457:46323:1902274:48250:15791:60…
9145	purine nucleoside triphosphate biosynthetic process	10 out of 377 genes, 2.7%	22 out of 5615 background genes, 0.4%	0.00051	0	CAGL0A01111g:CAGL0A03036g:CAGL0H01397g:CAGL0H05489g:CAGL0H07023g:CAGL0I00572g:CAGL0I04686g:CAGL0I07969g:CAGL0K02409g:CAGL0M13277g	6974:6241:6165:42407:6228:61508:15986:51211:6183:65003:33615:9142
9205	purine ribonucleoside triphosphate metabolic process	10 out of 377 genes, 2.7%	22 out of 5615 background genes, 0.4%	0.00051	0	CAGL0A01111g:CAGL0A03036g:CAGL0H01397g:CAGL0H05489g:CAGL0H07023g:CAGL0I00572g:CAGL0I04686g:CAGL0I07969g:CAGL0K02409g:CAGL0M13277g	6974:6241:6165:42407:6228:61508:15986:51211:6183:65003:33615:9142
9206	purine ribonucleoside triphosphate biosynthetic process	10 out of 377 genes, 2.7%	22 out of 5615 background genes, 0.4%	0.00051	0	CAGL0A01111g:CAGL0A03036g:CAGL0H01397g:CAGL0H05489g:CAGL0H07023g:CAGL0I00572g:CAGL0I04686g:CAGL0I07969g:CAGL0K02409g:CAGL0M13277g	6974:6241:6165:42407:6228:61508:15986:51211:6183:65003:33615:9142
19878	lysine biosynthetic process via aminoadipic acid	6 out of 377 genes, 1.6%	7 out of 5615 background genes, 0.1%	0.00058	0	LYS9:CAGL0F06875g:CAGL0J06402g:LYS21:CAGL0K07788g:CAGL0K10978g	6281:1207:9085:19878:55114
45733	acetate catabolic process	6 out of 377 genes, 1.6%	7 out of 5615 background genes, 0.1%	0.00058	0	CAGL0B04543g:CAGL0C05027g:ICL1:CAGL0J11836g:CAGL0L03982g:CAGL0M09020g	9437:55085:15741:15976:15744:6631:9062:45733:15879:6097
19646	aerobic electron transport chain	7 out of 377 genes, 1.9%	10 out of 5615 background genes, 0.2%	0.00059	0	CAGL0C01325g:CAGL0C02623g:CAGL0D00748g:CAGL0H02491g:CYC1:COX6:CAGL0L06160g	6123:6122:42775
6123	mitochondrial electron transport, cytochrome c to oxygen	7 out of 377 genes, 1.9%	10 out of 5615 background genes, 0.2%	0.00059	0	CAGL0C01325g:CAGL0C02623g:CAGL0D00748g:CAGL0H02491g:CYC1:COX6:CAGL0L06160g	6123:6122:42775
6112	energy reserve metabolic process	9 out of 377 genes, 2.4%	18 out of 5615 background genes, 0.3%	0.00071	0	CAGL0F02255g:CAGL0F04719g:CAGL0H02695g:CAGL0J02904g:CAGL0J03080g:CAGL0K03421g:PGM1:UGP1:CAGL0M12551g	1900180:19255:7094:5977:32515:6112:30003:32516:51156:6078:5978:6873:6011:35308:19388:6470:5992:6874
9072	aromatic amino acid family metabolic process	11 out of 377 genes, 2.9%	28 out of 5615 background genes, 0.5%	0.00082	0	CAGL0A02574g:ARO10:HIS4:CAGL0C01243g:CAGL0C01573g:CAGL0C01595g:ARO8:CAGL0G05610g:ARO3:HIS1:HIS3	6399:70791:6559:46148:950:1900832:6569:162:9073:55114:6552:949:10045:9058:105:951:1900829:19558
9144	purine nucleoside triphosphate metabolic process	10 out of 377 genes, 2.7%	23 out of 5615 background genes, 0.4%	0.00086	0	CAGL0A01111g:CAGL0A03036g:CAGL0H01397g:CAGL0H05489g:CAGL0H07023g:CAGL0I00572g:CAGL0I04686g:CAGL0I07969g:CAGL0K02409g:CAGL0M13277g	6974:6241:6165:42407:6228:61508:15986:51211:6183:65003:33615:9142
9199	ribonucleoside triphosphate metabolic process	10 out of 377 genes, 2.7%	23 out of 5615 background genes, 0.4%	0.00086	0	CAGL0A01111g:CAGL0A03036g:CAGL0H01397g:CAGL0H05489g:CAGL0H07023g:CAGL0I00572g:CAGL0I04686g:CAGL0I07969g:CAGL0K02409g:CAGL0M13277g	6974:6241:6165:42407:6228:61508:15986:51211:6183:65003:33615:9142
9201	ribonucleoside triphosphate biosynthetic process	10 out of 377 genes, 2.7%	23 out of 5615 background genes, 0.4%	0.00086	0	CAGL0A01111g:CAGL0A03036g:CAGL0H01397g:CAGL0H05489g:CAGL0H07023g:CAGL0I00572g:CAGL0I04686g:CAGL0I07969g:CAGL0K02409g:CAGL0M13277g	6974:6241:6165:42407:6228:61508:15986:51211:6183:65003:33615:9142
16054	organic acid catabolic process	16 out of 377 genes, 4.2%	60 out of 5615 background genes, 1.1%	0.00121	0	ARO10:CAGL0B04543g:CAGL0C04191g:CAGL0C05027g:CAGL0D04026g:ARO8:CAGL0G05610g:CAGL0H02585g:DLD1:ICL1:CAGL0J11836g:CAGL0L03982g:CAGL0L06798g:CAGL0L09108g:CAGL0L12254g:CAGL0M09020g	9437:55085:6399:15741:6559:15976:19629:43605:46148:9450:6735:19541:34599:950:1900832:6569:5975:6635:15744:6099:6631:55114:9062:1903457:45733:6540:6552:949:6536:15879:6538:9058:6523:6524:6097:951:1900829:19543:6108:19558
46395	carboxylic acid catabolic process	16 out of 377 genes, 4.2%	60 out of 5615 background genes, 1.1%	0.00121	0	ARO10:CAGL0B04543g:CAGL0C04191g:CAGL0C05027g:CAGL0D04026g:ARO8:CAGL0G05610g:CAGL0H02585g:DLD1:ICL1:CAGL0J11836g:CAGL0L03982g:CAGL0L06798g:CAGL0L09108g:CAGL0L12254g:CAGL0M09020g	9437:55085:6399:15741:6559:15976:19629:43605:46148:9450:6735:19541:34599:950:1900832:6569:5975:6635:15744:6099:6631:55114:9062:1903457:45733:6540:6552:949:6536:15879:6538:9058:6523:6524:6097:951:1900829:19543:6108:19558
6811	ion transport	36 out of 377 genes, 9.5%	232 out of 5615 background genes, 4.1%	0.00137	0	CAGL0A01111g:DIP5:CAGL0A03036g:CAGL0A04103g:CAGL0B04543g:CCC1:FPS1:SNF7:CAGL0D04708g:CAGL0D05632g:CAGL0E05632g:CAGL0F00231g:CAGL0F04213g:CAGL0F08085g:CAGL0G08195g:CAGL0H01397g:CAGL0H01837g:CAGL0H03333g:CAGL0H05489g:CAGL0H07023g:CAGL0I00572g:CAGL0I04686g:CAGL0I07969g:CAGL0J02002g:CAGL0J08294g:CAGL0J09306g:CAGL0K02409g:CAGL0K07436g:CAGL0K11616g:CAGL0L02079g:CAGL0L05742g:CAGL0L07546g:CAGL0L07766g:CA…	45324:19740:2001246:6843:55085:9061:71454:15741:6468:15914:6847:8272:15867:15812:6816:15976:6825:42407:15886:1990544:2:33554:82:15824:6846:15804:6812:15793:15848:747:45332:6865:6879:42391:1904669:15700:9060:70778:35434:15677:15744:15813:140021:6631:6842:15986:32048:61709:43328:9062:45733:34659:30026:6873:1904902:15847:46713:15680:6915:15866:6623:35352:15879:2001247:48250:15791:70676:46685:15696:6…
5996	monosaccharide metabolic process	12 out of 377 genes, 3.2%	35 out of 5615 background genes, 0.6%	0.00144	0	CAGL0A04829g:CAGL0C01397g:CAGL0C04543g:CAGL0E01705g:PYC1:CAGL0H04939g:CAGL0H06633g:GCY1:GRE3:FBP26:CAGL0K03421g:PGM1	6096:6006:6002:15976:19255:6090:6003:71470:42843:30003:34599:32445:46835:1678:61610:6099:51156:6013:5978:55114:16558:6094:6011:19568:46323:6000:19388:5992:6874:6108:72593
9081	branched-chain amino acid metabolic process	8 out of 377 genes, 2.1%	15 out of 5615 background genes, 0.3%	0.00163	0	CAGL0A00363g:ARO10:ILV5:CAGL0G05610g:CAGL0G06732g:LEU2:CAGL0H03905g:CAGL0K03465g	6399:9097:6559:9082:2:950:1900832:6569:55114:6552:949:9099:9098:951:1900829
15985	energy coupled proton transport, down electrochemical gradient	9 out of 377 genes, 2.4%	20 out of 5615 background genes, 0.4%	0.00219	0	CAGL0A01111g:CAGL0A03036g:CAGL0H01397g:CAGL0H05489g:CAGL0H07023g:CAGL0I00572g:CAGL0I04686g:CAGL0I07969g:CAGL0K02409g	42407:15986:65003:33615
15986	ATP synthesis coupled proton transport	9 out of 377 genes, 2.4%	20 out of 5615 background genes, 0.4%	0.00219	0	CAGL0A01111g:CAGL0A03036g:CAGL0H01397g:CAGL0H05489g:CAGL0H07023g:CAGL0I00572g:CAGL0I04686g:CAGL0I07969g:CAGL0K02409g	42407:15986:65003:33615
52803	imidazole-containing compound metabolic process	6 out of 377 genes, 1.6%	8 out of 5615 background genes, 0.1%	0.00221	0	HIS4:CAGL0C01243g:CAGL0C01595g:ARO8:HIS1:HIS3	46148:55114:10045:9058:105:19558
6547	histidine metabolic process	6 out of 377 genes, 1.6%	8 out of 5615 background genes, 0.1%	0.00221	0	HIS4:CAGL0C01243g:CAGL0C01595g:ARO8:HIS1:HIS3	46148:55114:10045:9058:105:19558
16051	carbohydrate biosynthetic process	13 out of 377 genes, 3.4%	43 out of 5615 background genes, 0.8%	0.00265	0	KRE9:CAGL0E01705g:CAGL0F04719g:PYC1:CAGL0G09064g:CAGL0H02387g:CAGL0H02695g:CAGL0H04939g:CAGL0H06633g:TPS1:CAGL0K03421g:PGM1:UGP1	44262:34605:6114:15976:19255:6090:70413:6077:71470:30003:34599:51156:6099:6078:5978:55114:16558:6094:42546:31505:6011:30437:19388:5992:71465:1900118:6874:6108:72593
5984	disaccharide metabolic process	8 out of 377 genes, 2.1%	16 out of 5615 background genes, 0.3%	0.00308	0	CAGL0G03883g:CAGL0G09020g:CAGL0H02387g:TPS1:CAGL0K03421g:PGM1:UGP1:CAGL0M10439g	43936:19538:44262:6468:34605:43455:1900760:19255:9847:70413:19933:34975:46827:71470:51085:42026:5993:30003:45721:35617:34599:71218:10515:45014:2000766:433:51156:6078:5978:71852:1319:70370:31505:10607:43335:6011:30437:70414:7186:7265:19388:10737:5992:1403:71465:1900118:6874
5991	trehalose metabolic process	8 out of 377 genes, 2.1%	16 out of 5615 background genes, 0.3%	0.00308	0	CAGL0G03883g:CAGL0G09020g:CAGL0H02387g:TPS1:CAGL0K03421g:PGM1:UGP1:CAGL0M10439g	43936:19538:44262:6468:34605:43455:1900760:19255:9847:70413:19933:34975:46827:71470:51085:42026:5993:30003:45721:35617:34599:71218:10515:45014:2000766:433:51156:6078:5978:71852:1319:70370:31505:10607:43335:6011:30437:70414:7186:7265:19388:10737:5992:1403:71465:1900118:6874
9142	nucleoside triphosphate biosynthetic process	10 out of 377 genes, 2.7%	26 out of 5615 background genes, 0.5%	0.00334	0.0003	CAGL0A01111g:CAGL0A03036g:CAGL0H01397g:CAGL0H05489g:CAGL0H07023g:CAGL0I00572g:CAGL0I04686g:CAGL0I07969g:CAGL0K02409g:CAGL0M13277g	6974:6241:6165:42407:6228:61508:15986:51211:6183:65003:33615:9142
6754	ATP biosynthetic process	9 out of 377 genes, 2.4%	21 out of 5615 background genes, 0.4%	0.00362	0.0003	CAGL0A01111g:CAGL0A03036g:CAGL0H01397g:CAGL0H05489g:CAGL0H07023g:CAGL0I00572g:CAGL0I04686g:CAGL0I07969g:CAGL0K02409g	42407:15986:65003:33615
72329	monocarboxylic acid catabolic process	11 out of 377 genes, 2.9%	33 out of 5615 background genes, 0.6%	0.00548	0.0003	CAGL0B04543g:CAGL0C04191g:CAGL0C05027g:CAGL0D04026g:DLD1:ICL1:CAGL0J11836g:CAGL0L03982g:CAGL0L06798g:CAGL0L09108g:CAGL0M09020g	9437:55085:15741:15976:19629:43605:9450:6735:19541:34599:5975:6635:15744:6099:6631:55114:9062:1903457:45733:6540:6536:15879:6097:19543:6108
9067	aspartate family amino acid biosynthetic process	11 out of 377 genes, 2.9%	34 out of 5615 background genes, 0.6%	0.00762	0.0003	LYS9:CAGL0D01892g:CAGL0F06875g:MET13:LYS12:HOM3:CAGL0J06402g:LYS21:CAGL0K07788g:CAGL0K10978g:STR3	6281:19346:6553:1207:9085:71266:6730:19878:55114:9088:9086:6532:9090
9066	aspartate family amino acid metabolic process	12 out of 377 genes, 3.2%	41 out of 5615 background genes, 0.7%	0.00942	0.0006	ARO10:LYS9:CAGL0D01892g:CAGL0F06875g:MET13:LYS12:HOM3:CAGL0J06402g:LYS21:CAGL0K07788g:CAGL0K10978g:STR3	6281:19346:6559:6553:1207:9085:71266:950:6730:6569:19878:55114:9088:6552:949:9086:951:6532:9090
19318	hexose metabolic process	10 out of 377 genes, 2.7%	29 out of 5615 background genes, 0.5%	0.0105	0.0006	CAGL0A04829g:CAGL0C01397g:CAGL0E01705g:PYC1:CAGL0H04939g:CAGL0H06633g:GRE3:FBP26:CAGL0K03421g:PGM1	6096:6006:6002:15976:19255:6090:6003:71470:42843:30003:34599:32445:46835:1678:6099:51156:6013:5978:55114:16558:6094:6011:19568:46323:6000:19388:5992:6874:6108:72593
9141	nucleoside triphosphate metabolic process	10 out of 377 genes, 2.7%	29 out of 5615 background genes, 0.5%	0.0105	0.0006	CAGL0A01111g:CAGL0A03036g:CAGL0H01397g:CAGL0H05489g:CAGL0H07023g:CAGL0I00572g:CAGL0I04686g:CAGL0I07969g:CAGL0K02409g:CAGL0M13277g	6974:6241:6165:42407:6228:61508:15986:51211:6183:65003:33615:9142
34220	ion transmembrane transport	21 out of 377 genes, 5.6%	111 out of 5615 background genes, 2.0%	0.01135	0.0006	CAGL0A01111g:DIP5:CAGL0A03036g:CAGL0D04708g:CAGL0F00231g:CAGL0F04213g:CAGL0F08085g:CAGL0H01397g:CAGL0H03333g:CAGL0H05489g:CAGL0H07023g:CAGL0I00572g:CAGL0I04686g:CAGL0I07969g:CAGL0J02002g:CAGL0K02409g:CAGL0K07436g:CAGL0L02079g:CAGL0L05742g:CAGL0L07766g:CAGL0M03465g	19740:6843:55085:9061:6847:15867:42407:15886:1990544:2:6846:6865:9060:70778:35434:15677:15813:140021:6842:15986:6915:15866:35352:48250:15696:35435:65003:15742:6850:33615:6839
6796	phosphate-containing compound metabolic process	58 out of 377 genes, 15.4%	495 out of 5615 background genes, 8.8%	0.01203	0.0006	CAGL0A01111g:CAGL0A01716g:CAGL0A03036g:CAGL0A04103g:CAGL0A04829g:CAGL0B02431g:CAGL0B03509g:CAGL0C01325g:CAGL0C01397g:PHM8:CAGL0C02623g:CAGL0D00748g:TKL1:CAGL0D05192g:CAGL0D06600g:CAGL0E03916g:CAGL0E06380g:CAGL0F03707g:CAGL0F07007g:CAGL0G08195g:CAGL0G09020g:CAGL0G10131g:CAGL0G10153g:CAGL0H01397g:CAGL0H01837g:CAGL0H02491g:CAGL0H03993g:CAGL0H05489g:CAGL0H06699g:CAGL0H07023g:CAGL0H09328g:CAGL0I00572g…	6096:43936:1902413:32878:6974:10255:6006:2001246:44262:45944:61408:6084:6002:19679:9272:6116:6123:60256:6468:15914:6241:43455:30968:1900760:6165:8361:10972:15976:19255:9266:9847:42407:19358:5977:19933:46827:6071:6003:1901524:71470:82:16480:34551:5993:30003:45721:6228:34599:90364:6104:46168:44011:16573:15848:30242:6098:32445:10973:10515:46835:45332:1678:45014:19427:61406:2000766:61508:50850:9060:4…
6793	phosphorus metabolic process	59 out of 377 genes, 15.6%	507 out of 5615 background genes, 9.0%	0.01238	0.0006	CAGL0A01111g:CAGL0A01716g:CAGL0A03036g:CAGL0A04103g:CAGL0A04829g:CAGL0B02431g:CAGL0B03509g:CAGL0C01325g:CAGL0C01397g:PHM8:CAGL0C02623g:CAGL0D00748g:TKL1:CAGL0D05192g:CAGL0D06600g:CAGL0E03916g:CAGL0E06380g:CAGL0F03707g:CAGL0F07007g:CAGL0G08195g:CAGL0G09020g:CAGL0G10131g:CAGL0G10153g:CAGL0H01397g:CAGL0H01837g:CAGL0H02491g:CAGL0H03993g:CAGL0H05489g:CAGL0H06699g:CAGL0H07023g:CAGL0H09328g:CAGL0I00572g…	6096:43936:1902413:32878:6974:10255:6006:2001246:44262:45944:61408:6084:6002:19679:9272:6116:6123:60256:6468:15914:6241:43455:30968:1900760:6165:8361:10972:15976:19255:9266:9847:42407:19358:5977:19933:46827:6071:6003:1901524:71470:82:16480:34551:5993:30003:45721:6228:34599:90364:6104:46168:44011:16573:15848:30242:6098:32445:10973:10515:46835:45332:1678:45014:19427:61406:2000766:61508:50850:9060:4…
7007	inner mitochondrial membrane organization	9 out of 377 genes, 2.4%	24 out of 5615 background genes, 0.4%	0.01343	0.0006	CAGL0B00396g:CAGL0D01958g:CAGL0G06600g:CAGL0G08195g:CAGL0H07023g:CAGL0H09306g:CAGL0I00572g:CAGL0I09262g:CAGL0K02409g	2001246:15914:42407:61024:6099:15986:32048:45333:45039:34622:43933:65003:46337:33615
34599	cellular response to oxidative stress	18 out of 377 genes, 4.8%	87 out of 5615 background genes, 1.5%	0.01348	0.0006	CAGL0A04433g:CAGL0B03509g:GPX2:CAGL0C04191g:CAGL0C04543g:SOD1:CAGL0E04356g:CAGL0E06424g:CAGL0G03883g:CAGL0G07271g:CAGL0H02585g:GCY1:GRE3:HSP12:TPS1:CAGL0K04235g:CTA1:MSN4	19538:1320:36278:44262:45944:71468:61408:45454:6882:6338:6468:1324:61422:34605:10972:46686:42744:70413:34975:61411:7155:71470:6696:9450:61409:61402:61403:51085:42026:42843:35617:34599:61395:71218:6098:10515:51091:61412:61406:61405:5975:61610:90344:61407:6801:1901856:1900181:61077:6111:1319:55114:70370:1903614:77:50821:6540:31505:43335:30437:19568:7231:70414:6457:6538:32092:33194:19430:40020:36091…
9311	oligosaccharide metabolic process	8 out of 377 genes, 2.1%	20 out of 5615 background genes, 0.4%	0.02376	0.0009	CAGL0G03883g:CAGL0G09020g:CAGL0H02387g:TPS1:CAGL0K03421g:PGM1:UGP1:CAGL0M10439g	43936:19538:44262:6468:34605:43455:1900760:19255:9847:70413:19933:34975:46827:71470:51085:42026:5993:30003:45721:35617:34599:71218:10515:45014:2000766:433:51156:6078:5978:71852:1319:70370:31505:10607:43335:6011:30437:70414:7186:7265:19388:10737:5992:1403:71465:1900118:6874
105	histidine biosynthetic process	5 out of 377 genes, 1.3%	7 out of 5615 background genes, 0.1%	0.02512	0.0014	HIS4:CAGL0C01243g:CAGL0C01595g:HIS1:HIS3	55114:10045:105
46351	disaccharide biosynthetic process	5 out of 377 genes, 1.3%	7 out of 5615 background genes, 0.1%	0.02512	0.0014	CAGL0H02387g:TPS1:CAGL0K03421g:PGM1:UGP1	44262:34605:19255:70413:71470:30003:34599:51156:6078:5978:6011:30437:19388:5992:71465:1900118:6874
5992	trehalose biosynthetic process	5 out of 377 genes, 1.3%	7 out of 5615 background genes, 0.1%	0.02512	0.0014	CAGL0H02387g:TPS1:CAGL0K03421g:PGM1:UGP1	44262:34605:19255:70413:71470:30003:34599:51156:6078:5978:6011:30437:19388:5992:71465:1900118:6874
6551	leucine metabolic process	5 out of 377 genes, 1.3%	7 out of 5615 background genes, 0.1%	0.02512	0.0014	CAGL0A00363g:ARO10:CAGL0G05610g:CAGL0G06732g:LEU2	6399:6559:950:1900832:6569:55114:6552:949:9098:951:1900829
72350	tricarboxylic acid metabolic process	5 out of 377 genes, 1.3%	7 out of 5615 background genes, 0.1%	0.02512	0.0013	CAGL0B04917g:IDP1:IDH1:CAGL0H03993g:IDH2	44262:6102:6099:46356:55114:6537:6101
9312	oligosaccharide biosynthetic process	5 out of 377 genes, 1.3%	7 out of 5615 background genes, 0.1%	0.02512	0.0013	CAGL0H02387g:TPS1:CAGL0K03421g:PGM1:UGP1	44262:34605:19255:70413:71470:30003:34599:51156:6078:5978:6011:30437:19388:5992:71465:1900118:6874
9073	aromatic amino acid family biosynthetic process	8 out of 377 genes, 2.1%	21 out of 5615 background genes, 0.4%	0.03616	0.0013	CAGL0A02574g:HIS4:CAGL0C01243g:CAGL0C01573g:CAGL0C01595g:ARO3:HIS1:HIS3	70791:162:9073:55114:10045:9058:105
15976	carbon utilization	7 out of 377 genes, 1.9%	16 out of 5615 background genes, 0.3%	0.03945	0.0015	CAGL0B04543g:CAGL0F07007g:CAGL0H06633g:ICL1:CAGL0J11836g:CAGL0L03982g:CAGL0M09020g	9437:55085:15741:15976:1901524:15744:6631:1904183:9062:6094:45733:18105:15879:6097
5977	glycogen metabolic process	7 out of 377 genes, 1.9%	16 out of 5615 background genes, 0.3%	0.03945	0.0015	CAGL0F02255g:CAGL0F04719g:CAGL0H02695g:CAGL0J02904g:CAGL0K03421g:PGM1:UGP1	1900180:19255:7094:5977:32515:30003:32516:51156:6078:5978:6873:6011:35308:19388:6470:5992:6874
16310	phosphorylation	29 out of 377 genes, 7.7%	200 out of 5615 background genes, 3.6%	0.05614	0.0015	CAGL0A04829g:CAGL0B02431g:CAGL0B03509g:CAGL0C01325g:CAGL0C02623g:CAGL0D00748g:CAGL0D05192g:CAGL0D06600g:CAGL0F03707g:CAGL0F07007g:CAGL0G09020g:CAGL0G10131g:CAGL0G10153g:CAGL0H01837g:CAGL0H02491g:CAGL0H09328g:CYC1:RIP1:YAK1:CAGL0I06270g:COX6:SLT2:CAGL0J05940g:CAGL0K01661g:CAGL0K02893g:CAGL0K10604g:CAGL0L06160g:CYT1:CAGL0M13277g	6096:43936:1902413:32878:6974:10255:6006:45944:61408:6002:9272:6116:6123:60256:6468:6241:43455:30968:1900760:6165:8361:10972:15976:9266:9847:19933:46827:1901524:71470:82:16480:34551:5993:45721:6228:34599:90364:44011:15848:30242:32445:10973:10515:46835:1678:45014:61406:2000766:61508:50850:9060:433:51156:6013:1900181:1904183:71852:902:46777:18105:6873:31505:10607:36498:15847:60237:51211:7231:6122:1…
5978	glycogen biosynthetic process	5 out of 377 genes, 1.3%	8 out of 5615 background genes, 0.1%	0.0633	0.0017	CAGL0F04719g:CAGL0H02695g:CAGL0K03421g:PGM1:UGP1	19255:30003:51156:6078:5978:6011:19388:5992:6874
71462	cellular response to water stimulus	5 out of 377 genes, 1.3%	8 out of 5615 background genes, 0.1%	0.0633	0.0017	CAGL0F08745g:CAGL0I05934g:TPS1:CAGL0M10439g:MSN4	36278:44262:45944:71468:61408:6338:1324:61422:34605:70413:61411:71470:61409:61402:42631:61403:5993:34599:61395:61412:61406:61405:61407:30437:61410:1302:5992:71465:1900118:120174:6357
9415	response to water	5 out of 377 genes, 1.3%	8 out of 5615 background genes, 0.1%	0.0633	0.0017	CAGL0F08745g:CAGL0I05934g:TPS1:CAGL0M10439g:MSN4	36278:44262:45944:71468:61408:6338:1324:61422:34605:70413:61411:71470:61409:61402:42631:61403:5993:34599:61395:61412:61406:61405:61407:30437:61410:1302:5992:71465:1900118:120174:6357
6102	isocitrate metabolic process	4 out of 377 genes, 1.1%	5 out of 5615 background genes, 0.1%	0.09544	0.0021	CAGL0B04917g:IDP1:IDH1:IDH2	6102:6099:55114:6537
6979	response to oxidative stress	18 out of 377 genes, 4.8%	100 out of 5615 background genes, 1.8%	0.09555	0.0021	CAGL0A04433g:CAGL0B03509g:GPX2:CAGL0C04191g:CAGL0C04543g:SOD1:CAGL0E04356g:CAGL0E06424g:CAGL0G03883g:CAGL0G07271g:CAGL0H02585g:GCY1:GRE3:HSP12:TPS1:CAGL0K04235g:CTA1:MSN4	19538:1320:36278:44262:45944:71468:61408:45454:6882:6338:6468:1324:61422:34605:10972:46686:42744:70413:34975:61411:7155:71470:6696:9450:61409:61402:61403:51085:42026:42843:35617:34599:61395:71218:6098:10515:51091:61412:61406:61405:5975:61610:90344:61407:6801:1901856:1900181:61077:6111:1319:55114:70370:1903614:77:50821:6540:31505:43335:30437:19568:7231:70414:6457:6538:32092:33194:19430:40020:36091…

## Sheet: Group 2
Supplementary File 11: List of GO-terms enriched from temporally induced genes in Cgxbp1∆ in response to macrophage infection
	GO-Term enrichment employing Candida genome database
GOID	GO_term	Cluster frequency	Background frequency	Corrected P-value	False discovery rate	Gene(s) annotated to the term	Directly Annotated GOID List
9152	purine ribonucleotide biosynthetic process	15 out of 139 genes, 10.8%	51 out of 5615 background genes, 0.9%	3.71e-10	0	CAGL0A03366g:CAGL0B02717g:CAGL0B02794g:ATP16:ATP2:CAGL0H04191g:CAGL0H07887g:CAGL0I04444g:CAGL0J10186g:CAGL0K04499g:CAGL0K05027g:ADE2:ATP7:ATP1:CAGL0M13717g	9116:6144:9152:45733:9113:46083:6164:6189:6106:33615:46084:71276:19427:15976:42776:6086:15986:6188:65003:42867:44208
72522	purine-containing compound biosynthetic process	16 out of 139 genes, 11.5%	61 out of 5615 background genes, 1.1%	4.34e-10	0	CAGL0A03366g:CAGL0B02717g:CAGL0B02794g:ATP16:MTD1:ATP2:CAGL0H04191g:CAGL0H07887g:CAGL0I04444g:CAGL0J10186g:CAGL0K04499g:CAGL0K05027g:ADE2:ATP7:ATP1:CAGL0M13717g	55114:9116:6144:9152:45733:9113:9396:46083:6106:6189:6164:33615:71276:46084:6730:42776:15976:19427:6086:15986:65003:6188:42867:44208
6164	purine nucleotide biosynthetic process	15 out of 139 genes, 10.8%	52 out of 5615 background genes, 0.9%	5.1e-10	0	CAGL0A03366g:CAGL0B02717g:CAGL0B02794g:ATP16:ATP2:CAGL0H04191g:CAGL0H07887g:CAGL0I04444g:CAGL0J10186g:CAGL0K04499g:CAGL0K05027g:ADE2:ATP7:ATP1:CAGL0M13717g	9116:6144:9152:45733:9113:46083:6106:6189:6164:33615:71276:46084:42776:15976:19427:6086:15986:65003:6188:42867:44208
9260	ribonucleotide biosynthetic process	15 out of 139 genes, 10.8%	55 out of 5615 background genes, 1.0%	1.27e-09	0	CAGL0A03366g:CAGL0B02717g:CAGL0B02794g:ATP16:ATP2:CAGL0H04191g:CAGL0H07887g:CAGL0I04444g:CAGL0J10186g:CAGL0K04499g:CAGL0K05027g:ADE2:ATP7:ATP1:CAGL0M13717g	9116:6144:9152:45733:9113:46083:6106:6189:6164:33615:71276:46084:42776:15976:19427:6086:15986:65003:6188:42867:44208
46390	ribose phosphate biosynthetic process	15 out of 139 genes, 10.8%	59 out of 5615 background genes, 1.1%	3.92e-09	0	CAGL0A03366g:CAGL0B02717g:CAGL0B02794g:ATP16:ATP2:CAGL0H04191g:CAGL0H07887g:CAGL0I04444g:CAGL0J10186g:CAGL0K04499g:CAGL0K05027g:ADE2:ATP7:ATP1:CAGL0M13717g	9116:6144:9152:45733:9113:46083:6106:6189:6164:33615:71276:46084:42776:15976:19427:6086:15986:65003:6188:42867:44208
6189	'de novo' IMP biosynthetic process	7 out of 139 genes, 5.0%	8 out of 5615 background genes, 0.1%	2.54e-08	0	CAGL0A03366g:CAGL0B02794g:CAGL0H07887g:CAGL0I04444g:CAGL0K04499g:ADE2:CAGL0M13717g	9116:6144:9152:9113:46083:6106:6189:6164:46084:6188:44208
9150	purine ribonucleotide metabolic process	16 out of 139 genes, 11.5%	81 out of 5615 background genes, 1.4%	4.72e-08	0	CAGL0A03366g:CAGL0B02717g:CAGL0B02794g:ATP16:ATP2:CAGL0H04191g:CAGL0H07887g:CAGL0I04444g:CAGL0J10186g:CAGL0K04499g:CAGL0K05027g:ADE2:ATP7:ATP1:GND1:CAGL0M13717g	9116:6144:9152:45733:9113:61688:46083:6106:6189:6164:33615:71276:46084:42776:15976:19427:6086:15986:65003:6188:42867:9051:46177:34599:44208
6163	purine nucleotide metabolic process	16 out of 139 genes, 11.5%	82 out of 5615 background genes, 1.5%	5.74e-08	0	CAGL0A03366g:CAGL0B02717g:CAGL0B02794g:ATP16:ATP2:CAGL0H04191g:CAGL0H07887g:CAGL0I04444g:CAGL0J10186g:CAGL0K04499g:CAGL0K05027g:ADE2:ATP7:ATP1:GND1:CAGL0M13717g	9116:6144:9152:45733:9113:61688:46083:6106:6189:6164:33615:71276:46084:42776:15976:19427:6086:15986:65003:6188:42867:9051:46177:34599:44208
72521	purine-containing compound metabolic process	17 out of 139 genes, 12.2%	95 out of 5615 background genes, 1.7%	6.07e-08	0	CAGL0A03366g:CAGL0B02717g:CAGL0B02794g:ATP16:MTD1:ATP2:CAGL0H04191g:CAGL0H07887g:CAGL0I04444g:CAGL0J10186g:CAGL0K04499g:CAGL0K05027g:ADE2:ATP7:ATP1:GND1:CAGL0M13717g	55114:9116:6144:9152:45733:9113:61688:9396:46083:6106:6189:6164:33615:71276:46084:6730:42776:15976:19427:6086:15986:65003:6188:42867:9051:46177:34599:44208
9165	nucleotide biosynthetic process	16 out of 139 genes, 11.5%	84 out of 5615 background genes, 1.5%	8.43e-08	0	CAGL0A03366g:CAGL0B02717g:CAGL0B02794g:ATP16:ATP2:CAGL0H04191g:CAGL0H07887g:CAGL0I04444g:CAGL0J10186g:CAGL0K04499g:CAGL0K05027g:ADE2:CAGL0L09581g:ATP7:ATP1:CAGL0M13717g	6226:9116:6144:9152:45733:9113:46083:6106:6189:6164:46081:33615:71276:46084:42776:15976:19427:6086:15986:65003:6188:46080:42867:44208
1901293	nucleoside phosphate biosynthetic process	16 out of 139 genes, 11.5%	87 out of 5615 background genes, 1.5%	1.46e-07	0	CAGL0A03366g:CAGL0B02717g:CAGL0B02794g:ATP16:ATP2:CAGL0H04191g:CAGL0H07887g:CAGL0I04444g:CAGL0J10186g:CAGL0K04499g:CAGL0K05027g:ADE2:CAGL0L09581g:ATP7:ATP1:CAGL0M13717g	6226:9116:6144:9152:45733:9113:46083:6106:6189:6164:46081:33615:71276:46084:42776:15976:19427:6086:15986:65003:6188:46080:42867:44208
9259	ribonucleotide metabolic process	16 out of 139 genes, 11.5%	87 out of 5615 background genes, 1.5%	1.46e-07	0	CAGL0A03366g:CAGL0B02717g:CAGL0B02794g:ATP16:ATP2:CAGL0H04191g:CAGL0H07887g:CAGL0I04444g:CAGL0J10186g:CAGL0K04499g:CAGL0K05027g:ADE2:ATP7:ATP1:GND1:CAGL0M13717g	9116:6144:9152:45733:9113:61688:46083:6106:6189:6164:33615:71276:46084:42776:15976:19427:6086:15986:65003:6188:42867:9051:46177:34599:44208
19693	ribose phosphate metabolic process	16 out of 139 genes, 11.5%	92 out of 5615 background genes, 1.6%	3.51e-07	0	CAGL0A03366g:CAGL0B02717g:CAGL0B02794g:ATP16:ATP2:CAGL0H04191g:CAGL0H07887g:CAGL0I04444g:CAGL0J10186g:CAGL0K04499g:CAGL0K05027g:ADE2:ATP7:ATP1:GND1:CAGL0M13717g	9116:6144:9152:45733:9113:61688:46083:6106:6189:6164:33615:71276:46084:42776:15976:19427:6086:15986:65003:6188:42867:9051:46177:34599:44208
46040	IMP metabolic process	7 out of 139 genes, 5.0%	10 out of 5615 background genes, 0.2%	3.66e-07	0	CAGL0A03366g:CAGL0B02794g:CAGL0H07887g:CAGL0I04444g:CAGL0K04499g:ADE2:CAGL0M13717g	9116:6144:9152:9113:46083:6106:6189:6164:46084:6188:44208
6188	IMP biosynthetic process	7 out of 139 genes, 5.0%	10 out of 5615 background genes, 0.2%	3.66e-07	0	CAGL0A03366g:CAGL0B02794g:CAGL0H07887g:CAGL0I04444g:CAGL0K04499g:ADE2:CAGL0M13717g	9116:6144:9152:9113:46083:6106:6189:6164:46084:6188:44208
9124	nucleoside monophosphate biosynthetic process	9 out of 139 genes, 6.5%	22 out of 5615 background genes, 0.4%	6.76e-07	0	CAGL0A03366g:CAGL0B02794g:CAGL0H07887g:CAGL0I04444g:CAGL0K04499g:CAGL0K05027g:ADE2:CAGL0L09581g:CAGL0M13717g	6226:9116:6144:9152:9113:46083:6106:6189:6164:46081:71276:46084:6188:46080:44208
9126	purine nucleoside monophosphate metabolic process	8 out of 139 genes, 5.8%	16 out of 5615 background genes, 0.3%	8.32e-07	0	CAGL0A03366g:CAGL0B02794g:CAGL0H07887g:CAGL0I04444g:CAGL0K04499g:CAGL0K05027g:ADE2:CAGL0M13717g	9116:6144:9152:9113:46083:6106:6189:6164:71276:46084:6188:44208
9127	purine nucleoside monophosphate biosynthetic process	8 out of 139 genes, 5.8%	16 out of 5615 background genes, 0.3%	8.32e-07	0	CAGL0A03366g:CAGL0B02794g:CAGL0H07887g:CAGL0I04444g:CAGL0K04499g:CAGL0K05027g:ADE2:CAGL0M13717g	9116:6144:9152:9113:46083:6106:6189:6164:71276:46084:6188:44208
9167	purine ribonucleoside monophosphate metabolic process	8 out of 139 genes, 5.8%	16 out of 5615 background genes, 0.3%	8.32e-07	0	CAGL0A03366g:CAGL0B02794g:CAGL0H07887g:CAGL0I04444g:CAGL0K04499g:CAGL0K05027g:ADE2:CAGL0M13717g	9116:6144:9152:9113:46083:6106:6189:6164:71276:46084:6188:44208
9168	purine ribonucleoside monophosphate biosynthetic process	8 out of 139 genes, 5.8%	16 out of 5615 background genes, 0.3%	8.32e-07	0	CAGL0A03366g:CAGL0B02794g:CAGL0H07887g:CAGL0I04444g:CAGL0K04499g:CAGL0K05027g:ADE2:CAGL0M13717g	9116:6144:9152:9113:46083:6106:6189:6164:71276:46084:6188:44208
9123	nucleoside monophosphate metabolic process	9 out of 139 genes, 6.5%	24 out of 5615 background genes, 0.4%	1.7e-06	0	CAGL0A03366g:CAGL0B02794g:CAGL0H07887g:CAGL0I04444g:CAGL0K04499g:CAGL0K05027g:ADE2:CAGL0L09581g:CAGL0M13717g	6226:9116:6144:9152:9113:46083:6106:6189:6164:46081:71276:46084:6188:46080:44208
9117	nucleotide metabolic process	17 out of 139 genes, 12.2%	124 out of 5615 background genes, 2.2%	4.44e-06	0	CAGL0A03366g:CAGL0B02717g:CAGL0B02794g:ATP16:ATP2:CAGL0H04191g:CAGL0H07887g:CAGL0I04444g:CAGL0J10186g:CAGL0K04499g:CAGL0K05027g:ADE2:CAGL0L09581g:ATP7:ATP1:GND1:CAGL0M13717g	6226:9116:6144:9152:45733:9113:61688:46083:6106:6189:6164:46081:33615:71276:46084:42776:15976:19427:6086:15986:65003:6188:46080:42867:9051:46177:34599:44208
9156	ribonucleoside monophosphate biosynthetic process	8 out of 139 genes, 5.8%	19 out of 5615 background genes, 0.3%	4.59e-06	0	CAGL0A03366g:CAGL0B02794g:CAGL0H07887g:CAGL0I04444g:CAGL0K04499g:CAGL0K05027g:ADE2:CAGL0M13717g	9116:6144:9152:9113:46083:6106:6189:6164:71276:46084:6188:44208
9161	ribonucleoside monophosphate metabolic process	8 out of 139 genes, 5.8%	19 out of 5615 background genes, 0.3%	4.59e-06	0	CAGL0A03366g:CAGL0B02794g:CAGL0H07887g:CAGL0I04444g:CAGL0K04499g:CAGL0K05027g:ADE2:CAGL0M13717g	9116:6144:9152:9113:46083:6106:6189:6164:71276:46084:6188:44208
6753	nucleoside phosphate metabolic process	17 out of 139 genes, 12.2%	131 out of 5615 background genes, 2.3%	1.04e-05	0	CAGL0A03366g:CAGL0B02717g:CAGL0B02794g:ATP16:ATP2:CAGL0H04191g:CAGL0H07887g:CAGL0I04444g:CAGL0J10186g:CAGL0K04499g:CAGL0K05027g:ADE2:CAGL0L09581g:ATP7:ATP1:GND1:CAGL0M13717g	6226:9116:6144:9152:45733:9113:61688:46083:6106:6189:6164:46081:33615:71276:46084:42776:15976:19427:6086:15986:65003:6188:46080:42867:9051:46177:34599:44208
55086	nucleobase-containing small molecule metabolic process	18 out of 139 genes, 12.9%	157 out of 5615 background genes, 2.8%	2.76e-05	0	CAGL0A03366g:CAGL0B02717g:CAGL0B02794g:ATP16:MTD1:ATP2:CAGL0H04191g:CAGL0H07887g:CAGL0I04444g:CAGL0J10186g:CAGL0K04499g:CAGL0K05027g:ADE2:CAGL0L09581g:ATP7:ATP1:GND1:CAGL0M13717g	55114:6226:9116:6144:9152:45733:9113:61688:9396:46083:6106:6189:6164:46081:33615:71276:46084:6730:42776:15976:19427:6086:15986:65003:6188:46080:42867:9051:46177:34599:44208
6334	nucleosome assembly	8 out of 139 genes, 5.8%	29 out of 5615 background genes, 0.5%	0.00021	0	HHT2:CAGL0C04136g:CAGL0C04389g:CAGL0C04411g:CAGL0H09834g:CAGL0H09856g:CAGL0K11440g:CAGL0K11462g	6301:6974:43935:122:6334:9303:31454:6352:34501:7076:6281:45739:6333:34729:70911:61587
1901137	carbohydrate derivative biosynthetic process	18 out of 139 genes, 12.9%	198 out of 5615 background genes, 3.5%	0.00094	0	CAGL0A03366g:CAGL0B02717g:CAGL0B02794g:ATP16:ATP2:CAGL0H04191g:CAGL0H07887g:VRG4:CAGL0I04444g:CAGL0J10186g:CAGL0K04499g:CAGL0K05027g:ADE2:CAGL0L09581g:ATP7:CAGL0L10670g:ATP1:CAGL0M13717g	6226:9116:6457:34975:9152:35269:7118:6164:46084:42776:9272:15986:6458:65003:6144:45733:30950:9113:1990570:6487:46083:6189:6106:33615:46081:71276:19427:15976:6086:6188:42867:46080:44208
90407	organophosphate biosynthetic process	17 out of 139 genes, 12.2%	179 out of 5615 background genes, 3.2%	0.00103	0	CAGL0A03366g:CAGL0B02717g:CAGL0B02794g:CAGL0C03069g:ATP16:ATP2:CAGL0H04191g:CAGL0H07887g:CAGL0I04444g:CAGL0J10186g:CAGL0K04499g:CAGL0K05027g:ADE2:CAGL0L09581g:ATP7:ATP1:CAGL0M13717g	1903078:6226:9116:9152:6164:46084:42776:15986:65003:71852:1903068:6646:51523:6144:45733:9113:6659:46083:6106:6189:46081:33615:71276:15976:19427:6086:70317:10512:6188:46080:42867:44208
44281	small molecule metabolic process	32 out of 139 genes, 23.0%	557 out of 5615 background genes, 9.9%	0.00234	0	TRP5:CAGL0A03366g:CAGL0B02717g:CAGL0B02794g:CAGL0B03663g:ATP16:ACP1:CAGL0D04356g:HOM2:CAGL0F01749g:CAGL0F04279g:MTD1:ATP2:CAGL0H04191g:CAGL0H07887g:CAGL0I04444g:CAGL0J01441g:ZWF1:CAGL0J08316g:CAGL0J10186g:CAGL0K04499g:CAGL0K05027g:CAGL0K05731g:CAGL0K06787g:ADE2:CAGL0L00429g:CAGL0L09581g:ATP7:ATP1:CAGL0M12837g:GND1:CAGL0M13717g	9092:6226:1900563:9116:6006:9152:723:44262:162:36182:35999:9089:9231:6567:15986:9070:6116:9097:70791:1900560:46177:51572:55114:1903379:6531:6094:45461:9107:45733:9113:61688:9088:6546:19464:46081:6740:51573:15976:6086:6771:16226:6188:46080:6090:9051:6101:9396:6164:6544:46084:42776:71266:65003:71441:34599:9086:19264:6144:6068:16925:46083:96:6189:6106:33615:71276:42542:6730:19427:43458:947:9090:4286…
1901135	carbohydrate derivative metabolic process	21 out of 139 genes, 15.1%	281 out of 5615 background genes, 5.0%	0.00289	0	CAGL0A03366g:CAGL0B02717g:CAGL0B02794g:TAL1:ATP16:ATP2:CAGL0H04191g:CAGL0H07887g:VRG4:CAGL0I04444g:ZWF1:CAGL0J10186g:CAGL0K04499g:CAGL0K05027g:ADE2:CAGL0L09581g:ATP7:CAGL0L10670g:ATP1:GND1:CAGL0M13717g	6226:9116:6006:9152:5975:9272:15986:6458:46177:30950:45733:9113:61688:1990570:6487:46081:6740:15976:6086:6188:46080:9051:6457:34975:35269:7118:6164:46084:42776:65003:34599:6144:46083:6098:6106:6189:33615:71276:42542:19427:42867:44208
18130	heterocycle biosynthetic process	28 out of 139 genes, 20.1%	462 out of 5615 background genes, 8.2%	0.00397	0	TRP5:CAGL0A03366g:CAGL0B02717g:CAGL0B02794g:CAGL0C00341g:HHT2:CAGL0C04136g:ATP16:CAGL0D01716g:ACP1:CAGL0E02761g:CAGL0F04279g:MTD1:ATP2:CAGL0H04191g:CAGL0H07887g:CAGL0H09834g:CAGL0I04444g:CAGL0J10186g:CAGL0K04499g:CAGL0K05027g:CAGL0K05071g:CAGL0K05731g:ADE2:CAGL0L09581g:ATP7:ATP1:CAGL0M13717g	6226:1900563:9116:6974:43935:7131:9152:723:31454:6352:162:36182:70940:9231:30491:6337:6281:7004:6367:15986:70791:1900560:722:51572:55114:1903379:45461:9107:9303:6260:45733:9113:10833:70987:1904594:46081:51573:70914:15976:6086:1174:6289:6771:16226:1903459:724:6188:46080:6265:30847:6301:1903364:6368:6334:6312:9396:16567:6164:42276:6369:46084:6268:30846:42776:45184:34729:65003:71441:32215:61587:3221…
19637	organophosphate metabolic process	20 out of 139 genes, 14.4%	288 out of 5615 background genes, 5.1%	0.01498	0	CAGL0A03366g:CAGL0B02717g:CAGL0B02794g:TAL1:CAGL0C03069g:ATP16:ATP2:CAGL0H04191g:CAGL0H07887g:CAGL0I04444g:ZWF1:CAGL0J10186g:CAGL0K04499g:CAGL0K05027g:ADE2:CAGL0L09581g:ATP7:ATP1:GND1:CAGL0M13717g	1903078:6226:9116:6006:9152:5975:15986:46177:71852:1903068:6646:51523:45733:9113:61688:6659:46081:6740:15976:6086:70317:10512:6188:46080:9051:6164:46084:42776:65003:34599:6144:46083:6098:6106:6189:33615:71276:42542:19427:42867:44208
19438	aromatic compound biosynthetic process	26 out of 139 genes, 18.7%	445 out of 5615 background genes, 7.9%	0.01743	0	TRP5:CAGL0A03366g:CAGL0B02717g:CAGL0B02794g:CAGL0C00341g:HHT2:CAGL0C04136g:ATP16:CAGL0D01716g:CAGL0E02761g:MTD1:ATP2:CAGL0H04191g:CAGL0H07887g:CAGL0H09834g:CAGL0I04444g:CAGL0J10186g:CAGL0K04499g:CAGL0K05027g:CAGL0K05071g:CAGL0K05731g:ADE2:CAGL0L09581g:ATP7:ATP1:CAGL0M13717g	6226:1900563:9116:6974:43935:7131:9152:723:31454:6352:162:36182:70940:30491:6337:6281:7004:6367:15986:70791:1900560:722:51572:55114:1903379:45461:9303:6260:45733:9113:10833:70987:1904594:46081:51573:70914:15976:6086:1174:6289:1903459:724:6188:46080:6265:30847:6301:1903364:6368:6334:6312:9396:16567:6164:42276:6369:46084:6268:30846:42776:45184:34729:65003:71441:32215:61587:32211:6144:1900264:9302:1…
1901362	organic cyclic compound biosynthetic process	28 out of 139 genes, 20.1%	502 out of 5615 background genes, 8.9%	0.01904	0	TRP5:CAGL0A03366g:CAGL0B02717g:CAGL0B02794g:CAGL0C00341g:HHT2:CAGL0C04136g:ATP16:CAGL0D01716g:ACP1:CAGL0E02761g:CAGL0F04279g:MTD1:ATP2:CAGL0H04191g:CAGL0H07887g:CAGL0H09834g:CAGL0I04444g:CAGL0J10186g:CAGL0K04499g:CAGL0K05027g:CAGL0K05071g:CAGL0K05731g:ADE2:CAGL0L09581g:ATP7:ATP1:CAGL0M13717g	6226:1900563:9116:6974:43935:7131:9152:723:31454:6352:162:36182:70940:9231:30491:6337:6281:7004:6367:15986:70791:1900560:722:51572:55114:1903379:45461:9107:9303:6260:45733:9113:10833:70987:1904594:46081:51573:70914:15976:6086:1174:6289:6771:16226:1903459:724:6188:46080:6265:30847:6301:1903364:6368:6334:6312:9396:16567:6164:42276:6369:46084:6268:30846:42776:45184:34729:65003:71441:32215:61587:3221…
9069	serine family amino acid metabolic process	6 out of 139 genes, 4.3%	27 out of 5615 background genes, 0.5%	0.0264	0	CAGL0D04356g:HOM2:CAGL0F01749g:CAGL0J08316g:CAGL0L00429g:CAGL0M12837g	9092:35999:9089:9070:9097:55114:6531:9088:6546:19464:6544:71266:9086:19264:96:6730:9090
34654	nucleobase-containing compound biosynthetic process	23 out of 139 genes, 16.5%	377 out of 5615 background genes, 6.7%	0.0279	0	CAGL0A03366g:CAGL0B02717g:CAGL0B02794g:CAGL0C00341g:HHT2:CAGL0C04136g:ATP16:CAGL0D01716g:CAGL0E02761g:ATP2:CAGL0H04191g:CAGL0H07887g:CAGL0H09834g:CAGL0I04444g:CAGL0J10186g:CAGL0K04499g:CAGL0K05027g:CAGL0K05071g:ADE2:CAGL0L09581g:ATP7:ATP1:CAGL0M13717g	6226:9116:6974:43935:7131:9152:31454:6352:70940:30491:6337:6281:7004:6367:15986:722:9303:6260:45733:9113:10833:70987:1904594:46081:70914:15976:6086:1174:6289:1903459:724:6188:46080:6265:30847:6301:1903364:6368:6334:6312:16567:6164:42276:6369:46084:6268:30846:42776:45184:34729:65003:32215:61587:32211:6144:1900264:9302:1902801:46083:6106:6189:33615:98789:71276:43044:31564:31124:19427:6271:42867:709…
6144	purine nucleobase metabolic process	5 out of 139 genes, 3.6%	17 out of 5615 background genes, 0.3%	0.02792	0	MTD1:CAGL0H07887g:CAGL0I04444g:ADE2:CAGL0M13717g	9116:9152:55114:9113:9396:6164:46084:6144:46083:6106:6189:6730
6106	fumarate metabolic process	3 out of 139 genes, 2.2%	4 out of 5615 background genes, 0.1%	0.03867	0	CAGL0B02794g:CAGL0I04444g:CAGL0K05027g	9152:6164:46084:6189:6106:71276:44208
9141	nucleoside triphosphate metabolic process	6 out of 139 genes, 4.3%	29 out of 5615 background genes, 0.5%	0.04068	0	ATP16:ATP2:CAGL0H04191g:CAGL0L09581g:ATP7:ATP1	6226:15986:46081:46080:42776:65003:33615
71852	fungal-type cell wall organization or biogenesis	13 out of 139 genes, 9.4%	153 out of 5615 background genes, 2.7%	0.06108	0.0005	CAGL0C03069g:PST1:CWP1.2:CWP1.1:CAGL0G00220g:TPS2:CAGL0G08668g:SSR1:PIR2:CAGL0L07502g:CAGL0L10670g:PIR5:CAGL0M13321g	1903078:5975:9272:6888:6458:71852:1903068:6646:51523:30950:6659:34605:6487:45053:6950:5991:31505:70317:10512:6457:70413:32120:34975:35269:7118:5992
15985	energy coupled proton transport, down electrochemical gradient	5 out of 139 genes, 3.6%	20 out of 5615 background genes, 0.4%	0.0659	0.0005	ATP16:ATP2:CAGL0H04191g:ATP7:ATP1	15986:42776:65003:33615
15986	ATP synthesis coupled proton transport	5 out of 139 genes, 3.6%	20 out of 5615 background genes, 0.4%	0.0659	0.0005	ATP16:ATP2:CAGL0H04191g:ATP7:ATP1	15986:42776:65003:33615
6730	one-carbon metabolic process	4 out of 139 genes, 2.9%	11 out of 5615 background genes, 0.2%	0.06875	0.0005	CAGL0D04356g:CAGL0F01749g:MTD1:CAGL0L00429g	35999:55114:9113:6546:19464:9396:6544:19264:6730
6754	ATP biosynthetic process	5 out of 139 genes, 3.6%	21 out of 5615 background genes, 0.4%	0.08478	0.0009	ATP16:ATP2:CAGL0H04191g:ATP7:ATP1	15986:42776:65003:33615

## Sheet: Group 3
Supplementary File 11: List of GO-terms enriched from temporally induced genes in Cgxbp1∆ in response to macrophage infection
	GO-Term enrichment employing Candida genome database
GOID	GO_term	Cluster frequency	Background frequency	Corrected P-value	False discovery rate	Gene(s) annotated to the term	Directly Annotated GOID List
1676	long-chain fatty acid metabolic process	4 out of 132 genes, 3.0%	6 out of 5615 background genes, 0.1%	0.00241	0	CAGL0D00528g:CAGL0E06138g:CAGL0I09878g:CAGL0L10780g	1900535:55114:1905329:1676:44539:42759:9059:35336:6633
42759	long-chain fatty acid biosynthetic process	3 out of 132 genes, 2.3%	3 out of 5615 background genes, 0.1%	0.00726	0	CAGL0D00528g:CAGL0E06138g:CAGL0L10780g	1900535:55114:42759:9059:6633
15908	fatty acid transport	4 out of 132 genes, 3.0%	8 out of 5615 background genes, 0.1%	0.01086	0	CAGL0D00418g:CAGL0G07667g:CAGL0I09878g:CAGL0K07293g	15909:1905329:1676:44539:15918:35336:15908
15909	long-chain fatty acid transport	3 out of 132 genes, 2.3%	4 out of 5615 background genes, 0.1%	0.02856	0.03	CAGL0D00418g:CAGL0I09878g:CAGL0K07293g	15909:1905329:1676:44539:35336
6633	fatty acid biosynthetic process	5 out of 132 genes, 3.8%	21 out of 5615 background genes, 0.4%	0.05722	0.044	CAGL0D00528g:CAGL0E06138g:SUR4:CAGL0I00418g:CAGL0L10780g	1900535:6892:30497:32511:55114:42759:30148:42761:6636:1:9059:45471:6633

## Sheet: Group 4
Supplementary File 11: List of GO-terms enriched from temporally induced genes in Cgxbp1∆ in response to macrophage infection
	GO-Term enrichment employing Candida genome database
GOID	GO_term	Cluster frequency	Background frequency	Corrected P-value	False discovery rate	Gene(s) annotated to the term	Directly Annotated GOID List
5977	glycogen metabolic process	3 out of 35 genes, 8.6%	16 out of 5615 background genes, 0.3%	0.01986	0.2	CAGL0F04895g:CAGL0H04037g:CAGL0M03377g	51321:5980:5978:7094:5977:9408
6112	energy reserve metabolic process	3 out of 35 genes, 8.6%	18 out of 5615 background genes, 0.3%	0.0287	0.11	CAGL0F04895g:CAGL0H04037g:CAGL0M03377g	51321:5980:5978:7094:5977:9408
90150	establishment of protein localization to membrane	5 out of 35 genes, 14.3%	89 out of 5615 background genes, 1.6%	0.03369	0.0733	SSA3:CAGL0H05005g:CAGL0I05098g:CAGL0I05940g:CAGL0K09592g	45040:30150:31204:15914:46488:6457:17157:43001:45717:1901352:2001247:6616:2000114:1900035:6893
6869	lipid transport	4 out of 35 genes, 11.4%	50 out of 5615 background genes, 0.9%	0.04018	0.06	AUS1:CAGL0H05005g:CAGL0I05940g:CAGL0J03916g	34727:15914:2001247:15918:2000114:6897:30011:6887:55085:46488:35376:43001:17157:45717:1901352:6893
10876	lipid localization	4 out of 35 genes, 11.4%	54 out of 5615 background genes, 1.0%	0.05421	0.06	AUS1:CAGL0H05005g:CAGL0I05940g:CAGL0J03916g	34727:15914:2001247:15918:2000114:6897:30011:6887:46488:55085:17157:43001:35376:1901352:45717:6893
72657	protein localization to membrane	5 out of 35 genes, 14.3%	108 out of 5615 background genes, 1.9%	0.08311	0.06	SSA3:CAGL0H05005g:CAGL0I05098g:CAGL0I05940g:CAGL0K09592g	15914:6457:2001247:6616:2000114:45040:30150:31204:46488:17157:43001:1901352:45717:6893:1900035

## Sheet: Group 5
Supplementary File 11: List of GO-terms enriched from temporally induced genes in Cgxbp1∆ in response to macrophage infection
	GO-Term enrichment employing Candida genome database
GOID	GO_term	Cluster frequency	Background frequency	Corrected P-value	False discovery rate	Gene(s) annotated to the term	Directly Annotated GOID List
42254	ribosome biogenesis	44 out of 272 genes, 16.2%	285 out of 5615 background genes, 5.1%	1.79e-09	0	CAGL0A02673g:CAGL0A04015g:ARB1:CAGL0C03531g:SSB1:CAGL0D03674g:CAGL0E03289g:CAGL0E03938g:CAGL0F01045g:CAGL0F06809g:CAGL0G06248g:CAGL0G07535g:CAGL0G08041g:CAGL0G08173g:CAGL0G09130g:CAGL0H02057g:CAGL0H08976g:CAGL0I07975g:CAGL0I09350g:CAGL0I09790g:CAGL0J00473g:CAGL0J00737g:CAGL0J00891g:CAGL0J00957g:CAGL0J01265g:CAGL0J09614g:CAGL0J10802g:CAGL0J11220g:CAGL0K01859g:CAGL0K02123g:CAGL0K02211g:CAGL0K02233g…	45943:51083:6413:31167:1902280:55:6913:27:6449:2000786:463:1901195:42274:447:462:42254:30476:1990120:480:42149:31120:70476:51321:43144:6450:56:31118:54:470:1902626:19933:469:42255:2109:466:6369:16973:28:7117:30490:465:184:278:8033:6611:30163:6470:6452:30488:6364:2181:6412:16070:34063:1990258:464:461:494:71042:6415:479:18364:45727:42273:32790:6407:472
22613	ribonucleoprotein complex biogenesis	45 out of 272 genes, 16.5%	346 out of 5615 background genes, 6.2%	3.89e-07	0	CAGL0A02673g:CAGL0A04015g:ARB1:CAGL0C03531g:SSB1:CAGL0D03674g:CAGL0E03289g:CAGL0E03938g:CAGL0F01045g:CAGL0F06809g:CAGL0G06248g:CAGL0G07535g:CAGL0G08041g:CAGL0G08173g:CAGL0G09130g:CAGL0H02057g:CAGL0H08976g:CAGL0I07975g:TIF3:CAGL0I09350g:CAGL0I09790g:CAGL0J00473g:CAGL0J00737g:CAGL0J00891g:CAGL0J00957g:CAGL0J01265g:CAGL0J09614g:CAGL0J10802g:CAGL0J11220g:CAGL0K01859g:CAGL0K02123g:CAGL0K02211g:CAGL0K0…	45943:51083:97010:6413:31167:1902280:55:6913:27:6449:2000786:463:1901195:42274:447:462:42254:30476:1990120:480:42149:31120:51321:70476:1731:43144:6450:56:31118:54:32781:470:1902626:19933:469:42255:2109:6369:466:28:16973:7117:30490:465:184:8033:278:6611:30163:6470:6452:30488:6364:2181:1990258:6412:16070:34063:464:461:494:71042:479:6415:18364:45727:42273:32790:6407:472
9132	nucleoside diphosphate metabolic process	10 out of 272 genes, 3.7%	26 out of 5615 background genes, 0.5%	0.00013	0	CAGL0D03432g:GPM1:PFK1:CAGL0G04213g:TPI1:ENO1:FBA1:PGK1:PFK2:PYK1	6096:32889:5975:61621:6002:9186:55114:70072:7035:6094:15810:15976:51453:6090:6240:30388:46704:9263
9185	ribonucleoside diphosphate metabolic process	9 out of 272 genes, 3.3%	23 out of 5615 background genes, 0.4%	0.00047	0	CAGL0D03432g:GPM1:PFK1:TPI1:ENO1:FBA1:PGK1:PFK2:PYK1	6096:32889:5975:61621:6002:55114:70072:7035:6094:15810:15976:51453:6090:6240:30388:46704:9263
44281	small molecule metabolic process	53 out of 272 genes, 19.5%	557 out of 5615 background genes, 9.9%	0.0006	0	SAH1:GPD2:CAGL0D03432g:ATF2:CAGL0E01529g:ERG11:ALA1:CAGL0E05654g:GPM1:ERG3:PHO87:SCS7:CAGL0F03927g:URA7:PFK1:CAGL0F08459g:BAT1:CAGL0G02937g:CAGL0G04213g:CAGL0G04741g:APT1:TDH3:SUR2:CAGL0H07667g:TPI1:CAGL0I01342g:ENO1:HMT1:CAGL0I05500g:ADH1:CAGL0I09592g:CAGL0J00451g:ALD5:CAGL0J04554g:CAGL0J05984g:CAGL0K03927g:CAGL0K04477g:CAGL0K05313g:CAGL0K10780g:FBA1:SUN4:PGK1:CAGL0L10043g:PFK2:ERG10:CAR2:CAGL0M…	6096:9116:6768:6006:32889:30448:5975:6543:19510:34478:10121:32968:61621:6015:44205:6427:6002:55085:70994:9186:6168:43103:6116:9097:6591:71852:6207:6067:46656:55114:6520:6559:6537:70072:7035:6094:43951:6241:34209:10133:6066:6656:15810:19413:6114:31505:60567:6072:15976:6665:6673:51453:6814:6198:949:6146:6915:9082:19856:6090:30437:15886:910:6526:30148:6431:6110:1901089:19933:71590:6240:32874:6003:60…
6096	glycolytic process	8 out of 272 genes, 2.9%	19 out of 5615 background genes, 0.3%	0.00107	0	GPM1:PFK1:TPI1:ENO1:FBA1:PGK1:PFK2:PYK1	6096:32889:5975:61621:6002:70072:7035:6094:15810:15976:51453:6090:30388
6757	ATP generation from ADP	8 out of 272 genes, 2.9%	19 out of 5615 background genes, 0.3%	0.00107	0	GPM1:PFK1:TPI1:ENO1:FBA1:PGK1:PFK2:PYK1	6096:32889:5975:61621:6002:70072:7035:6094:15810:15976:51453:6090:30388
42273	ribosomal large subunit biogenesis	16 out of 272 genes, 5.9%	84 out of 5615 background genes, 1.5%	0.00159	0	CAGL0C03531g:CAGL0E03289g:CAGL0E03938g:CAGL0F06809g:CAGL0G06248g:CAGL0G07535g:CAGL0G08041g:CAGL0G09130g:CAGL0I07975g:CAGL0I09350g:CAGL0J00473g:CAGL0J00957g:CAGL0K02233g:CAGL0L03806g:CAGL0L05500g:CAGL0M02695g	6413:55:1902280:6913:27:2000786:463:1901195:42274:447:30476:51321:70476:54:470:1902626:19933:42255:466:7117:30490:465:278:30163:6470:30488:6412:16070:34063:464:6415:18364:45727:42273:32790
46031	ADP metabolic process	8 out of 272 genes, 2.9%	20 out of 5615 background genes, 0.4%	0.00171	0	GPM1:PFK1:TPI1:ENO1:FBA1:PGK1:PFK2:PYK1	6096:32889:5975:61621:6002:70072:7035:6094:15810:15976:51453:6090:30388
6364	rRNA processing	26 out of 272 genes, 9.6%	198 out of 5615 background genes, 3.5%	0.00209	0	CAGL0A04015g:CAGL0C03531g:SSB1:CAGL0E03938g:CAGL0G06248g:CAGL0G07535g:CAGL0G08173g:CAGL0G09130g:CAGL0I07975g:CAGL0I09790g:CAGL0J00473g:CAGL0J00737g:CAGL0J01265g:CAGL0J09614g:CAGL0J10802g:CAGL0K01859g:CAGL0K02211g:CAGL0K02233g:SSB2:CAGL0K08382g:CAGL0L03806g:CAGL0L03846g:CAGL0L04950g:PDR13:CAGL0M01056g:CAGL0M11110g	45943:51083:31167:55:27:463:42274:447:462:42254:1990120:480:42149:31120:70476:43144:6450:31118:54:470:469:42255:2109:6369:466:28:30490:465:184:8033:30163:6452:30488:6364:2181:1990258:6412:464:461:494:71042:479:6415:18364:42273:472
6090	pyruvate metabolic process	9 out of 272 genes, 3.3%	27 out of 5615 background genes, 0.5%	0.00231	0	GPM1:PFK1:TPI1:ENO1:FBA1:PGK1:PFK2:PDC:PYK1	6096:32889:5975:61621:6002:6559:70072:7035:6094:15810:15976:51453:949:6090:45069:19655:30388:6569
6165	nucleoside diphosphate phosphorylation	8 out of 272 genes, 2.9%	21 out of 5615 background genes, 0.4%	0.00265	0	GPM1:PFK1:TPI1:ENO1:FBA1:PGK1:PFK2:PYK1	6096:32889:5975:61621:6002:70072:7035:6094:15810:15976:51453:6090:30388
9135	purine nucleoside diphosphate metabolic process	8 out of 272 genes, 2.9%	21 out of 5615 background genes, 0.4%	0.00265	0	GPM1:PFK1:TPI1:ENO1:FBA1:PGK1:PFK2:PYK1	6096:32889:5975:61621:6002:70072:7035:6094:15810:15976:51453:6090:30388
9179	purine ribonucleoside diphosphate metabolic process	8 out of 272 genes, 2.9%	21 out of 5615 background genes, 0.4%	0.00265	0	GPM1:PFK1:TPI1:ENO1:FBA1:PGK1:PFK2:PYK1	6096:32889:5975:61621:6002:70072:7035:6094:15810:15976:51453:6090:30388
55086	nucleobase-containing small molecule metabolic process	22 out of 272 genes, 8.1%	157 out of 5615 background genes, 2.8%	0.00442	0	SAH1:CAGL0D03432g:GPM1:CAGL0F03927g:URA7:PFK1:CAGL0G04213g:APT1:CAGL0H07667g:TPI1:ENO1:CAGL0I05500g:CAGL0I09592g:CAGL0J05984g:CAGL0K10780g:FBA1:SUN4:PGK1:CAGL0L10043g:PFK2:PYK1:CAGL0M12881g	6096:9116:6006:32889:5975:6543:19510:61621:6015:44205:6002:9186:6168:43103:71852:6207:55114:70072:7035:6094:43951:6241:6656:15810:31505:15976:51453:6198:6146:19856:6090:910:6526:19933:71590:6240:6177:44209:6164:9168:42776:43101:30388:46704:10389:70409:8654:6641:9263:7165:9651:9165:6730:6357:71592
71428	rRNA-containing ribonucleoprotein complex export from nucleus	12 out of 272 genes, 4.4%	53 out of 5615 background genes, 0.9%	0.00486	0	CAGL0A02673g:ARB1:SSB1:CAGL0F01045g:CAGL0F06809g:CAGL0G07535g:CAGL0G08041g:CAGL0H08976g:CAGL0J11220g:CAGL0K02123g:SSB2:CAGL0M04873g	51083:6413:55:27:2000786:447:42254:30476:42149:51321:6450:56:54:19933:42255:6611:6470:6452:6364:2181:6412:6415:45727:42273:32790:6407
19693	ribose phosphate metabolic process	16 out of 272 genes, 5.9%	92 out of 5615 background genes, 1.6%	0.00552	0	CAGL0D03432g:GPM1:CAGL0F03927g:URA7:PFK1:APT1:CAGL0H07667g:TPI1:ENO1:CAGL0I05500g:FBA1:SUN4:PGK1:PFK2:PYK1:CAGL0M12881g	6096:9116:32889:5975:61621:6015:44205:6002:6168:6207:71852:55114:70072:7035:6094:43951:6241:15810:31505:15976:51453:6198:19856:6090:910:19933:6240:6177:44209:42776:30388:46704:8654:9263:9165
16072	rRNA metabolic process	26 out of 272 genes, 9.6%	213 out of 5615 background genes, 3.8%	0.00821	0	CAGL0A04015g:CAGL0C03531g:SSB1:CAGL0E03938g:CAGL0G06248g:CAGL0G07535g:CAGL0G08173g:CAGL0G09130g:CAGL0I07975g:CAGL0I09790g:CAGL0J00473g:CAGL0J00737g:CAGL0J01265g:CAGL0J09614g:CAGL0J10802g:CAGL0K01859g:CAGL0K02211g:CAGL0K02233g:SSB2:CAGL0K08382g:CAGL0L03806g:CAGL0L03846g:CAGL0L04950g:PDR13:CAGL0M01056g:CAGL0M11110g	45943:51083:31167:55:27:463:42274:447:462:42254:1990120:480:42149:31120:70476:43144:6450:31118:54:470:469:42255:2109:6369:466:28:30490:465:184:8033:30163:6452:30488:6364:2181:1990258:6412:464:461:494:71042:479:6415:18364:42273:472
46939	nucleotide phosphorylation	8 out of 272 genes, 2.9%	24 out of 5615 background genes, 0.4%	0.00844	0	GPM1:PFK1:TPI1:ENO1:FBA1:PGK1:PFK2:PYK1	6096:32889:5975:61621:6002:70072:7035:6094:15810:15976:51453:6090:30388
6753	nucleoside phosphate metabolic process	19 out of 272 genes, 7.0%	131 out of 5615 background genes, 2.3%	0.01197	0	CAGL0D03432g:GPM1:CAGL0F03927g:URA7:PFK1:CAGL0G04213g:APT1:CAGL0H07667g:TPI1:ENO1:CAGL0I05500g:CAGL0J05984g:CAGL0K10780g:FBA1:SUN4:PGK1:PFK2:PYK1:CAGL0M12881g	6096:9116:32889:5975:61621:6015:44205:6002:9186:6168:43103:6207:71852:55114:70072:7035:6094:43951:6241:15810:31505:15976:51453:6198:6146:19856:6090:910:19933:6240:6177:44209:6164:9168:42776:43101:30388:46704:10389:8654:9263:9165
9259	ribonucleotide metabolic process	15 out of 272 genes, 5.5%	87 out of 5615 background genes, 1.5%	0.01202	0	CAGL0D03432g:GPM1:CAGL0F03927g:URA7:PFK1:APT1:CAGL0H07667g:TPI1:ENO1:FBA1:SUN4:PGK1:PFK2:PYK1:CAGL0M12881g	6096:9116:32889:5975:61621:44205:6002:6168:6207:71852:55114:70072:7035:6094:43951:6241:15810:15976:51453:6198:19856:6090:19933:6240:6177:44209:42776:30388:46704:8654:9263
1901617	organic hydroxy compound biosynthetic process	12 out of 272 genes, 4.4%	58 out of 5615 background genes, 1.0%	0.01307	0	CAGL0C03630g:GPD2:ERG11:ERG3:CAGL0G02937g:ADH1:CAGL0K03927g:CAGL0K04477g:CAGL0L03828g:ERG10:PDC:RHR2	16126:6116:6067:55114:6559:8299:6114:6072:949:6090:6071:45069:7005:6696:19655:46168:6569:6879:43458:947:6633
9117	nucleotide metabolic process	18 out of 272 genes, 6.6%	124 out of 5615 background genes, 2.2%	0.01997	0	CAGL0D03432g:GPM1:CAGL0F03927g:URA7:PFK1:CAGL0G04213g:APT1:CAGL0H07667g:TPI1:ENO1:CAGL0I05500g:CAGL0K10780g:FBA1:SUN4:PGK1:PFK2:PYK1:CAGL0M12881g	6096:9116:32889:5975:61621:6015:44205:6002:9186:6168:6207:71852:55114:70072:7035:6094:43951:6241:15810:31505:15976:51453:6198:19856:6090:910:19933:6240:6177:44209:6164:42776:30388:46704:8654:9263:9165
46688	response to copper ion	4 out of 272 genes, 1.5%	5 out of 5615 background genes, 0.1%	0.02144	0	MT-I:FET3:MT-II:MT-IIB	33215:71280:55114:71292:34755:46688:1901684
50658	RNA transport	17 out of 272 genes, 6.2%	115 out of 5615 background genes, 2.0%	0.02653	0.0016	CAGL0A02673g:ARB1:SSB1:TEF1:CAGL0D03674g:CAGL0F01045g:CAGL0F06809g:CAGL0G07535g:CAGL0G08041g:CAGL0H08976g:HMT1:YDJ1:CAGL0J11220g:CAGL0K02123g:SSB2:CAGL0K07832g:CAGL0M04873g	51083:6413:32968:55:27:6449:30433:2000786:42274:447:2182:6458:42254:46656:30476:42149:45047:51321:60567:6450:56:54:35719:19933:51017:6511:6406:71470:18216:42255:6414:19919:16973:42026:1900035:6611:6470:6452:6364:2181:18195:6412:6626:6415:45727:6409:42273:32790:6407
51236	establishment of RNA localization	17 out of 272 genes, 6.2%	115 out of 5615 background genes, 2.0%	0.02653	0.0015	CAGL0A02673g:ARB1:SSB1:TEF1:CAGL0D03674g:CAGL0F01045g:CAGL0F06809g:CAGL0G07535g:CAGL0G08041g:CAGL0H08976g:HMT1:YDJ1:CAGL0J11220g:CAGL0K02123g:SSB2:CAGL0K07832g:CAGL0M04873g	51083:6413:32968:55:27:6449:30433:2000786:42274:447:2182:6458:42254:46656:30476:42149:45047:51321:60567:6450:56:54:35719:19933:51017:6511:6406:71470:18216:42255:6414:19919:16973:42026:1900035:6611:6470:6452:6364:2181:18195:6412:6626:6415:45727:6409:42273:32790:6407
50657	nucleic acid transport	17 out of 272 genes, 6.2%	117 out of 5615 background genes, 2.1%	0.03331	0.0015	CAGL0A02673g:ARB1:SSB1:TEF1:CAGL0D03674g:CAGL0F01045g:CAGL0F06809g:CAGL0G07535g:CAGL0G08041g:CAGL0H08976g:HMT1:YDJ1:CAGL0J11220g:CAGL0K02123g:SSB2:CAGL0K07832g:CAGL0M04873g	51083:6413:32968:55:27:6449:30433:2000786:42274:447:2182:6458:42254:46656:30476:42149:45047:51321:60567:6450:56:54:35719:19933:51017:6511:6406:71470:18216:42255:6414:19919:16973:42026:1900035:6611:6470:6452:6364:2181:18195:6412:6626:6415:45727:6409:42273:32790:6407
72521	purine-containing compound metabolic process	15 out of 272 genes, 5.5%	95 out of 5615 background genes, 1.7%	0.03551	0.0014	SAH1:GPM1:CAGL0F03927g:PFK1:APT1:CAGL0H07667g:TPI1:ENO1:CAGL0J05984g:CAGL0K10780g:FBA1:SUN4:PGK1:PFK2:PYK1	6096:9116:32889:5975:19510:61621:6002:6168:43103:71852:55114:70072:7035:6094:43951:6656:15810:15976:51453:6198:6146:6090:19933:6177:44209:6164:9168:42776:43101:30388:10389:6641:6730
9063	cellular amino acid catabolic process	8 out of 272 genes, 2.9%	29 out of 5615 background genes, 0.5%	0.03987	0.0014	SAH1:BAT1:CAGL0G02937g:ADH1:CAGL0I09592g:CAR2:CAGL0M04499g:PDC	6543:19510:10121:6116:6591:6207:6067:55114:6559:6537:10133:6656:949:9082:6090:6526:45069:19655:70409:9083:6641:6730:6569:43458:947
6405	RNA export from nucleus	16 out of 272 genes, 5.9%	109 out of 5615 background genes, 1.9%	0.04958	0.0013	CAGL0A02673g:ARB1:SSB1:TEF1:CAGL0D03674g:CAGL0F01045g:CAGL0F06809g:CAGL0G07535g:CAGL0G08041g:CAGL0H08976g:HMT1:CAGL0J11220g:CAGL0K02123g:SSB2:CAGL0K07832g:CAGL0M04873g	51083:6413:32968:55:27:6449:2000786:42274:447:2182:42254:46656:30476:42149:51321:60567:6450:56:54:19933:51017:6406:18216:42255:6414:19919:16973:6611:6470:6452:6364:2181:18195:6412:6415:45727:6409:42273:32790:6407
71426	ribonucleoprotein complex export from nucleus	16 out of 272 genes, 5.9%	109 out of 5615 background genes, 1.9%	0.04958	0.0013	CAGL0A02673g:ARB1:SSB1:TEF1:CAGL0D03674g:CAGL0F01045g:CAGL0F06809g:CAGL0G07535g:CAGL0G08041g:CAGL0H08976g:HMT1:CAGL0J11220g:CAGL0K02123g:SSB2:CAGL0K07832g:CAGL0M04873g	51083:6413:32968:55:27:6449:2000786:42274:447:2182:42254:46656:30476:42149:51321:60567:6450:56:54:19933:51017:6406:18216:42255:6414:19919:16973:6611:6470:6452:6364:2181:18195:6412:6415:45727:6409:42273:32790:6407
16125	sterol metabolic process	9 out of 272 genes, 3.3%	38 out of 5615 background genes, 0.7%	0.05017	0.0012	CAGL0C03630g:CAGL0D05566g:ATF2:ERG11:ERG3:CAGL0K03927g:CAGL0K04477g:CAGL0L03828g:ERG10	16126:55114:8299:34209:6066:1901089:7005:6696:9636:8202:6879:6633:16125
46165	alcohol biosynthetic process	10 out of 272 genes, 3.7%	47 out of 5615 background genes, 0.8%	0.05247	0.0012	GPD2:ERG11:ERG3:CAGL0G02937g:ADH1:CAGL0K03927g:CAGL0K04477g:ERG10:PDC:RHR2	6116:6067:55114:6559:6114:6072:949:6090:6071:45069:7005:6696:19655:46168:6569:6879:43458:947:6633
71166	ribonucleoprotein complex localization	16 out of 272 genes, 5.9%	110 out of 5615 background genes, 2.0%	0.05553	0.0012	CAGL0A02673g:ARB1:SSB1:TEF1:CAGL0D03674g:CAGL0F01045g:CAGL0F06809g:CAGL0G07535g:CAGL0G08041g:CAGL0H08976g:HMT1:CAGL0J11220g:CAGL0K02123g:SSB2:CAGL0K07832g:CAGL0M04873g	51083:6413:32968:55:27:6449:2000786:42274:447:2182:42254:46656:30476:42149:51321:60567:6450:56:54:19933:51017:6406:18216:42255:6414:19919:16973:6611:6470:6452:6364:2181:18195:6412:6415:45727:6409:42273:32790:6407
51168	nuclear export	16 out of 272 genes, 5.9%	111 out of 5615 background genes, 2.0%	0.0621	0.0011	CAGL0A02673g:ARB1:SSB1:TEF1:CAGL0D03674g:CAGL0F01045g:CAGL0F06809g:CAGL0G07535g:CAGL0G08041g:CAGL0H08976g:HMT1:CAGL0J11220g:CAGL0K02123g:SSB2:CAGL0K07832g:CAGL0M04873g	51083:6413:32968:55:27:6449:2000786:42274:447:2182:42254:46656:30476:42149:51321:60567:6450:56:54:19933:51017:6406:18216:42255:6414:19919:16973:6611:6470:6452:6364:2181:18195:6412:6415:45727:6409:42273:32790:6407
6611	protein export from nucleus	16 out of 272 genes, 5.9%	111 out of 5615 background genes, 2.0%	0.0621	0.0011	CAGL0A02673g:ARB1:SSB1:TEF1:CAGL0D03674g:CAGL0F01045g:CAGL0F06809g:CAGL0G07535g:CAGL0G08041g:CAGL0H08976g:HMT1:CAGL0J11220g:CAGL0K02123g:SSB2:CAGL0K07832g:CAGL0M04873g	51083:6413:32968:55:27:6449:2000786:42274:447:2182:42254:46656:30476:42149:51321:60567:6450:56:54:19933:51017:6406:18216:42255:6414:19919:16973:6611:6470:6452:6364:2181:18195:6412:6415:45727:6409:42273:32790:6407
6415	translational termination	5 out of 272 genes, 1.8%	11 out of 5615 background genes, 0.2%	0.07723	0.0011	TEF3:SSB1:CAGL0G08041g:CAGL0J02816g:CAGL0L10164g	51083:288:6413:32436:1900038:2000639:55114:42149:6450:71455:54:6414:6452:6364:2181:6415:45727:18188:42273:10620:32790:43392
1901615	organic hydroxy compound metabolic process	15 out of 272 genes, 5.5%	102 out of 5615 background genes, 1.8%	0.08261	0.0011	CAGL0C03630g:GPD2:CAGL0D05566g:ATF2:ERG11:CAGL0E05654g:ERG3:CAGL0G02937g:ADH1:CAGL0K03927g:CAGL0K04477g:CAGL0L03828g:ERG10:PDC:RHR2	34478:16126:6116:6067:55114:6559:8299:34209:6066:6114:6072:949:6090:1901089:6071:45069:7005:6696:19655:46168:9636:46475:8202:6569:6879:43458:947:6633:16125
10272	response to silver ion	3 out of 272 genes, 1.1%	3 out of 5615 background genes, 0.1%	0.09302	0.0015	MT-I:MT-II:MT-IIB	71280:71292
71280	cellular response to copper ion	3 out of 272 genes, 1.1%	3 out of 5615 background genes, 0.1%	0.09302	0.0015	MT-I:MT-II:MT-IIB	71280:71292
71292	cellular response to silver ion	3 out of 272 genes, 1.1%	3 out of 5615 background genes, 0.1%	0.09302	0.0015	MT-I:MT-II:MT-IIB	71280:71292
16052	carbohydrate catabolic process	9 out of 272 genes, 3.3%	41 out of 5615 background genes, 0.7%	0.09487	0.0014	GPM1:PFK1:TPI1:ENO1:CAGL0K05137g:FBA1:PGK1:PFK2:PYK1	6096:32889:5975:61621:6002:71361:70072:7035:6094:15810:15976:51453:6090:5993:30388:71465:71497
8202	steroid metabolic process	9 out of 272 genes, 3.3%	41 out of 5615 background genes, 0.7%	0.09487	0.0014	CAGL0C03630g:CAGL0D05566g:ATF2:ERG11:ERG3:CAGL0K03927g:CAGL0K04477g:CAGL0L03828g:ERG10	16126:55114:8299:34209:6066:1901089:7005:6696:9636:8202:6879:6633:16125
