# Supplementary material for: Temporal transcriptional response of Candida glabrata during macrophage infection reveals a multifaceted transcriptional regulator CgXbp1 important for macrophage response and fluconazole resistance
Source: eLife. 2024 Oct 2;13:e73832. doi: 10.7554/eLife.73832 (PMC11554308; doi:10.7554/eLife.73832)
Supplement: Supplementary file 12. [file elife-73832-supp12.xlsx]

## Sheet: DEGs in WT
Supplementary File 12 - List of differentially expressed genes upon fluconazole treatment in wildtype C. glabrata strain
	WT_DEGs	Log2FC	P-value
	CAGL0C03223g	-3.20012	1.21485e-136
	CAGL0E02255g	-2.74864	8.84642e-54
	CAGL0H10076g	-2.10412	1.25665e-58
	CAGL0L13392g	-1.98553	6.25046e-25
	CAGL0D01265g	-1.88902	6.52381e-21
	CAGL0J05390g	-1.87505	2.02163e-19
	CAGL0D00869g	-1.84505	0.0272439
	CAGL0I03476g	-1.82425	1.88647e-38
	CAGL0K06039g	-1.78942	1.22095e-14
	CAGL0I01408g	-1.70153	4.47535e-49
	CAGL0J00429g	-1.6903	6.29632e-48
	CAGL0J01699g	-1.68886	1.23922e-33
	CAGL0G09262g	-1.65915	1.3963e-24
	CAGL0G10153g	-1.63825	1.44429e-43
	CAGL0H07579g	-1.60322	0.000386532
	CAGL0C01325g	-1.58793	2.50618e-37
	CAGL0A03905g	-1.58523	1.76946e-36
	CAGL0E01771g	-1.57276	8.16483e-19
	CAGL0A03542g	-1.56575	3.59231e-38
	CAGL0D05192g	-1.53869	2.31958e-37
	CAGL0L06160g	-1.51733	6.352e-41
	CAGL0G05566g	-1.51708	2.46513e-26
	CAGL0K02409g	-1.50587	3.17149e-33
	CAGL0I06270g	-1.47889	7.14028e-36
	CAGL0B00286g	-1.47333	2.08568e-26
	CAGL0J00385g	-1.47246	3.05906e-27
	CAGL0H03993g	-1.46016	3.17711e-36
	CAGL0F04213g	-1.45678	3.26482e-39
	CAGL0C02623g	-1.45594	1.33426e-30
	CAGL0K06061g	-1.44518	1.22931e-18
	CAGL0I06743g	-1.43074	1.76126e-28
	CAGL0L08481g	-1.42767	0.0143379
	CAGL0C05115g	-1.42658	1.05225e-22
	CAGL0H09064g	-1.42118	5.17374e-25
	CAGL0F00363g	-1.3986	2.71931e-30
	CAGL0I00748g	-1.39412	1.87288e-32
	CAGL0A01001g	-1.3853	3.08363e-16
	CAGL0I03190g	-1.38478	2.11917e-31
	CAGL0G10131g	-1.38326	6.01091e-35
	CAGL0H02491g	-1.36052	1.59487e-23
	CAGL0F00231g	-1.35487	2.23557e-34
	CAGL0D00748g	-1.35294	1.47973e-24
	CAGL0J06380g	-1.35162	3.9073e-22
	CAGL0L10912g	-1.34666	3.38122e-19
	CAGL0E03201g	-1.34485	3.04573e-27
	CAGL0E04994g	-1.33991	3.65123e-19
	CAGL0D06424g	-1.33345	4.35174e-31
	CAGL0L10406g	-1.32906	7.36405e-31
	CAGL0I07227g	-1.32756	1.31505e-32
	CAGL0L05236g	-1.32075	3.64582e-24
	CAGL0M07293g	-1.32061	1.10117e-15
	CAGL0L08114g	-1.30236	1.04964e-17
	CAGL0H09328g	-1.29289	2.58086e-23
	CAGL0F04565g	-1.29254	4.414e-31
	CAGL0L08448g	-1.28834	1.12382e-17
	CAGL0D01958g	-1.27915	4.3405e-28
	CAGL0I03234g	-1.27329	2.24977e-18
	CAGL0G08712g	-1.27159	4.44401e-21
	CAGL0B01122g	-1.26685	3.84192e-28
	CAGL0L06138g	-1.25934	6.76332e-27
	CAGL0F02563g	-1.23875	7.87437e-15
	CAGL0L01551g	-1.23294	5.7442e-22
	CAGL0G02871g	-1.20183	1.17587e-06
	CAGL0E04356g	-1.19883	5.597e-14
	CAGL0L04510g	-1.19818	7.49696e-21
	CAGL0J06374g	-1.18795	1.50613e-14
	CAGL0F06413g	-1.18391	1.68575e-22
	CAGL0M09581g	-1.1733	5.47374e-25
	CAGL0H00506g	-1.16727	4.53609e-25
	CAGL0L08118g	-1.16476	1.87049e-15
	CAGL0J09086g	-1.15328	5.1271e-18
	CAGL0H05489g	-1.13242	1.11315e-23
	CAGL0L03846g	-1.12792	0.00357486
	CAGL0M12925g	-1.12637	1.04583e-10
	CAGL0F03927g	-1.11941	4.39904e-17
	CAGL0B04345g	-1.11863	1.50247e-22
	CAGL0I01430g	-1.11816	2.23627e-22
	CAGL0K06567g	-1.11618	1.41906e-18
	CAGL0A03366g	-1.10486	4.66091e-14
	CAGL0A03388g	-1.09795	5.50835e-18
	CAGL0A03278g	-1.09701	2.60677e-17
	CAGL0J00847g	-1.09699	2.16828e-19
	CAGL0H02409g	-1.0953	1.09925e-16
	CAGL0K06033g	-1.09369	5.49905e-13
	CAGL0I08547g	-1.09023	2.80401e-13
	CAGL0I07969g	-1.08984	9.04186e-16
	CAGL0G07227g	-1.08255	7.42062e-17
	CAGL0C01573g	-1.07828	4.02187e-22
	CAGL0D00528g	-1.07612	7.91826e-14
	CAGL0L12870g	-1.07037	1.59728e-16
	CAGL0A03036g	-1.06385	3.51211e-18
	CAGL0G02079g	-1.06326	1.90985e-18
	CAGL0M06303g	-1.06066	5.20701e-15
	CAGL0M02497g	-1.05173	1.88121e-13
	CAGL0J03234g	-1.04833	1.44809e-13
	CAGL0B01507g	-1.04667	6.84893e-09
	CAGL0L10560g	-1.04519	1.28492e-17
	CAGL0K08382g	-1.04277	2.39686e-12
	CAGL0K06259g	-1.04073	8.69495e-12
	CAGL0A02189g	-1.03898	1.68512e-15
	CAGL0L13156g	-1.03847	5.66183e-12
	CAGL0H07975g	-1.03758	5.415e-13
	CAGL0M06523g	-1.03741	1.71142e-15
	CAGL0D05214g	-1.03396	1.14956e-11
	CAGL0K03135g	-1.03295	1.17831e-11
	CAGL0G00154g	-1.03109	5.82705e-17
	CAGL0K12012g	-1.03084	9.94871e-17
	CAGL0D00616g	-1.02893	1.81435e-12
	CAGL0J07238g	-1.02868	2.73775e-14
	CAGL0L06204g	-1.02689	2.16381e-17
	CAGL0G03575g	-1.02687	2.90318e-14
	CAGL0M00176g	-1.02532	2.1118e-11
	CAGL0K02541g	-1.02386	1.77999e-13
	CAGL0B04257g	-1.02371	1.62398e-16
	CAGL0A00979g	-1.02196	1.70768e-12
	CAGL0A01562g	-1.0211	1.89494e-14
	CAGL0I00792g	-1.02088	1.01437e-14
	CAGL0I00814g	-1.01903	1.64557e-12
	CAGL0E03157g	-1.01755	1.26013e-19
	CAGL0H00462g	-1.01682	9.53919e-15
	CAGL0G08217g	-1.0162	7.41065e-06
	CAGL0G07711g	-1.01433	1.49773e-16
	CAGL0M03861g	-1.01233	2.97844e-15
	CAGL0M08118g	-1.01072	2.28977e-16
	CAGL0H03685g	-1.0098	8.33459e-15
	CAGL0L08426g	-1.00695	3.89231e-06
	CAGL0I09592g	-1.00682	2.57523e-12
	CAGL0H08734g	-1.00522	6.8176e-14
	CAGL0E03938g	-1.0052	3.11629e-14
	CAGL0M04873g	-0.997867	4.86833e-14
	CAGL0G01078g	-0.995448	9.36604e-13
	CAGL0K07414g	-0.992415	1.60497e-13
	CAGL0G06490g	-0.99108	1.0194e-13
	CAGL0M13277g	-0.98866	1.9501e-16
	CAGL0F01045g	-0.984864	1.48906e-14
	CAGL0J09614g	-0.983938	8.27729e-13
	CAGL0G05027g	-0.983188	2.63013e-15
	CAGL0L05676g	-0.9828	3.82763e-11
	CAGL0B02794g	-0.979856	0.010989
	CAGL0M08778g	-0.979661	0.00273574
	CAGL0I04686g	-0.973266	8.05651e-18
	CAGL0K05027g	-0.97144	1.86761e-10
	CAGL0E01991g	-0.971291	1.89463e-13
	CAGL0K03091g	-0.968612	6.42571e-09
	CAGL0K10780g	-0.968241	1.05806e-12
	CAGL0E01287g	-0.963189	1.2547e-16
	CAGL0D00176g	-0.961932	1.0079e-13
	CAGL0L10978g	-0.957538	5.46272e-12
	CAGL0J00165g	-0.955922	1.28267e-12
	CAGL0C04741g	-0.953066	2.46831e-08
	CAGL0C04301g	-0.952652	2.25248e-14
	CAGL0A02299g	-0.951347	7.36607e-07
	CAGL0G08173g	-0.950431	6.30282e-11
	CAGL0B01203g	-0.949536	7.87924e-10
	CAGL0K10868g	-0.944884	1.35541e-10
	CAGL0G05940g	-0.943575	1.09387e-10
	CAGL0J02354g	-0.943195	6.25476e-13
	CAGL0L11462g	-0.942793	3.25189e-12
	CAGL0K10906g	-0.942382	1.1071e-12
	CAGL0G08195g	-0.941771	4.85534e-13
	CAGL0I00462g	-0.941368	9.38382e-09
	CAGL0J08679g	-0.940458	6.11486e-16
	CAGL0G02475g	-0.939363	7.973e-11
	CAGL0K02893g	-0.939036	1.00912e-12
	CAGL0L12892g	-0.937301	3.47884e-08
	CAGL0A03168g	-0.931737	2.33266e-09
	CAGL0H08976g	-0.931727	2.79979e-11
	CAGL0M12408g	-0.928563	6.38844e-12
	CAGL0F06897g	-0.92788	2.28923e-10
	CAGL0B02717g	-0.92549	1.95721e-14
	CAGL0B03795g	-0.924737	2.03572e-14
	CAGL0M10241g	-0.924624	3.70989e-11
	CAGL0J10164g	-0.924466	1.88235e-12
	CAGL0J00737g	-0.92229	1.06047e-11
	CAGL0A01540g	-0.92196	2.00665e-11
	CAGL0L06886g	-0.921714	1.91893e-11
	CAGL0H04521g	-0.920867	2.31e-12
	CAGL0J01661g	-0.920626	7.4303e-08
	CAGL0H01397g	-0.917176	1.85126e-14
	CAGL0F02937g	-0.916507	7.67094e-11
	CAGL0I06380g	-0.916243	1.4427e-13
	CAGL0F05863g	-0.915647	3.53688e-14
	CAGL0J07898g	-0.915146	5.11157e-14
	CAGL0F08547g	-0.914822	2.27758e-11
	CAGL0M08558g	-0.908049	0.0175536
	CAGL0K02123g	-0.907062	1.00938e-11
	CAGL0I00418g	-0.906574	2.35085e-14
	CAGL0M00814g	-0.906478	1.82834e-12
	CAGL0J07766g	-0.904529	5.71397e-11
	CAGL0F07073g	-0.903008	1.50702e-10
	CAGL0G07106g	-0.902451	1.54535e-08
	CAGL0K11748g	-0.90047	2.18699e-12
	CAGL0L04840g	-0.897585	1.47039e-12
	CAGL0H00957g	-0.897503	4.81126e-13
	CAGL0D00858g	-0.894596	3.13473e-08
	CAGL0M06677g	-0.894316	6.2026e-14
	CAGL0G09669g	-0.893233	7.48293e-14
	CAGL0K02739g	-0.893067	1.29751e-13
	CAGL0I10494g	-0.892699	4.64437e-12
	CAGL0G10109g	-0.892551	8.46865e-09
	CAGL0F01683g	-0.89184	3.55524e-13
	CAGL0L06952g	-0.89136	1.15225e-12
	CAGL0C05379g	-0.889223	8.69846e-12
	CAGL0H04763g	-0.887982	8.35806e-16
	CAGL0H00869g	-0.885266	3.73653e-13
	CAGL0A02112g	-0.88287	8.57188e-12
	CAGL0G02673g	-0.881417	1.43553e-13
	CAGL0F09031g	-0.880752	8.49813e-13
	CAGL0M07832g	-0.880067	6.43198e-06
	CAGL0M02695g	-0.87987	4.07064e-10
	CAGL0K06149g	-0.878672	1.51081e-10
	CAGL0C02211g	-0.874926	6.45301e-09
	CAGL0F01705g	-0.87284	4.44704e-13
	CAGL0M06501g	-0.87264	2.29287e-09
	CAGL0J10362g	-0.869646	9.50895e-11
	CAGL0G01826g	-0.868513	3.5222e-10
	CAGL0K06787g	-0.867942	1.28551e-14
	CAGL0J10802g	-0.867555	2.65354e-09
	CAGL0A01111g	-0.867006	3.0845e-12
	CAGL0G07271g	-0.866309	9.31658e-12
	CAGL0G03927g	-0.864042	2.76295e-08
	CAGL0E01463g	-0.863677	1.02884e-11
	CAGL0H04675g	-0.862486	1.62011e-11
	CAGL0M02849g	-0.861751	6.50079e-12
	CAGL0D02090g	-0.859527	6.97693e-13
	CAGL0L09713g	-0.857779	5.46772e-13
	CAGL0K11880g	-0.857734	1.36697e-13
	CAGL0L08008g	-0.857454	6.4889e-11
	CAGL0I09790g	-0.853049	2.90538e-10
	CAGL0L08110g	-0.850514	1.65598e-07
	CAGL0L00319g	-0.849594	4.2185e-13
	CAGL0J04070g	-0.849591	1.49445e-10
	CAGL0D03718g	-0.846613	4.29266e-12
	CAGL0K01859g	-0.844668	1.62175e-12
	CAGL0H05643g	-0.843171	7.30462e-12
	CAGL0A04521g	-0.842597	6.02038e-10
	CAGL0K09724g	-0.841743	2.78207e-12
	CAGL0L03806g	-0.840094	1.19551e-07
	CAGL0M12991g	-0.839392	5.2483e-12
	CAGL0J10406g	-0.835476	2.93773e-12
	CAGL0K07656g	-0.833505	6.7634e-12
	CAGL0H04691g	-0.830678	1.37157e-08
	CAGL0H02057g	-0.829874	1.94704e-10
	CAGL0I04356g	-0.82844	1.69928e-12
	CAGL0E02013g	-0.828204	5.79652e-11
	CAGL0C02629g	-0.827005	0.033099
	CAGL0M00484g	-0.822823	1.23269e-09
	CAGL0L04378g	-0.819861	4.99815e-06
	CAGL0J00649g	-0.816623	7.41492e-10
	CAGL0A01221g	-0.814863	2.24845e-05
	CAGL0I00550g	-0.807542	0.000306017
	CAGL0L05148g	-0.80641	2.95267e-12
	CAGL0L02475g	-0.806227	7.31455e-12
	CAGL0A04015g	-0.805015	4.16222e-10
	CAGL0G09713g	-0.803701	2.0597e-08
	CAGL0D01562g	-0.799327	3.46095e-05
	CAGL0J10384g	-0.799153	1.1277e-10
	CAGL0M10197g	-0.798355	9.28709e-09
	CAGL0G07529g	-0.798059	1.77094e-05
	CAGL0M07876g	-0.795703	1.89337e-07
	CAGL0H09372g	-0.791351	4.36707e-10
	CAGL0E03289g	-0.789613	9.46242e-11
	CAGL0G00990g	-0.788848	1.5261e-08
	CAGL0A03234g	-0.788259	7.5169e-11
	CAGL0M08552g	-0.78522	2.55551e-11
	CAGL0I07799g	-0.782944	8.74246e-09
	CAGL0D04290g	-0.782593	3.53611e-11
	CAGL0B00792g	-0.782511	6.49542e-09
	CAGL0J09790g	-0.782122	1.88259e-10
	CAGL0J02816g	-0.781937	7.35812e-09
	CAGL0K12848g	-0.780801	5.31977e-11
	CAGL0C03531g	-0.779124	1.95578e-08
	CAGL0A02673g	-0.778808	1.72443e-09
	CAGL0C03630g	-0.778471	9.02506e-11
	CAGL0M13893g	-0.778035	3.61886e-11
	CAGL0F08481g	-0.776428	3.81837e-08
	CAGL0A01023g	-0.775485	4.47489e-08
	CAGL0L10868g	-0.772495	1.10194e-08
	CAGL0C02233g	-0.770707	6.34124e-08
	CAGL0H04191g	-0.770354	1.3146e-09
	CAGL0I00594g	-0.770185	1.92965e-10
	CAGL0M05593g	-0.770147	1.11191e-09
	CAGL0I00440g	-0.769094	1.81369e-07
	CAGL0C01947g	-0.768639	4.57099e-11
	CAGL0F04433g	-0.768517	1.63889e-09
	CAGL0I04730g	-0.768326	2.21368e-10
	CAGL0G08041g	-0.766224	2.4211e-10
	CAGL0J06952g	-0.766011	1.59407e-07
	CAGL0L01331g	-0.765292	1.96213e-11
	CAGL0K04741g	-0.764639	2.0188e-11
	CAGL0L07788g	-0.763413	4.37672e-10
	CAGL0F00627g	-0.761691	4.99109e-10
	CAGL0M06325g	-0.760573	3.73645e-06
	CAGL0A02365g	-0.75976	8.18605e-11
	CAGL0C01793g	-0.756682	3.06888e-06
	CAGL0C02343g	-0.753794	1.35235e-09
	CAGL0M05995g	-0.752296	2.30419e-08
	CAGL0G03091g	-0.751179	8.60055e-09
	CAGL0G02013g	-0.749745	4.58482e-08
	CAGL0E03245g	-0.748078	2.73005e-08
	CAGL0I06512g	-0.747322	6.47466e-09
	CAGL0E04114g	-0.745747	4.1557e-08
	CAGL0G03003g	-0.74572	7.91731e-10
	CAGL0J11440g	-0.743338	1.78988e-10
	CAGL0L01353g	-0.742991	4.50584e-07
	CAGL0J00473g	-0.74207	3.58897e-08
	CAGL0L01925g	-0.740142	3.84869e-06
	CAGL0J03718g	-0.737986	1.61815e-08
	CAGL0K06281g	-0.737428	3.56433e-08
	CAGL0H06699g	-0.737073	8.82895e-09
	CAGL0F01001g	-0.734913	1.11098e-07
	CAGL0M11616g	-0.732002	4.32486e-06
	CAGL0F07579g	-0.729552	1.43036e-09
	CAGL0I05500g	-0.729191	3.81286e-07
	CAGL0L12540g	-0.729177	6.72238e-09
	CAGL0C02189g	-0.728511	2.5485e-10
	CAGL0A01782g	-0.728331	6.18097e-05
	CAGL0A02090g	-0.725404	2.16536e-07
	CAGL0J11220g	-0.725376	1.41835e-07
	CAGL0G09130g	-0.723515	2.69087e-09
	CAGL0K04345g	-0.722991	6.08537e-09
	CAGL0G09933g	-0.722759	1.36358e-05
	CAGL0M00572g	-0.72223	2.30601e-06
	CAGL0L07656g	-0.722061	9.07611e-10
	CAGL0J11462g	-0.721468	6.23166e-10
	CAGL0A00495g	-0.720406	3.69145e-11
	CAGL0J04576g	-0.717202	2.17934e-06
	CAGL0L00561g	-0.715911	0.026345
	CAGL0M09977g	-0.715416	1.13645e-08
	CAGL0K11231g	-0.714417	2.96715e-09
	CAGL0J05984g	-0.713733	7.10382e-08
	CAGL0K00583g	-0.710632	3.63372e-07
	CAGL0L06754g	-0.707207	2.03983e-09
	CAGL0M12122g	-0.707125	3.83108e-08
	CAGL0I07667g	-0.705898	6.29081e-07
	CAGL0L08184g	-0.705527	1.92785e-08
	CAGL0K10912g	-0.704207	7.47831e-09
	CAGL0D01188g	-0.703449	4.27343e-10
	CAGL0I05566g	-0.703234	7.89599e-09
	CAGL0I10224g	-0.702977	0.00394138
	CAGL0M13717g	-0.701189	2.32645e-06
	CAGL0F02299g	-0.700972	1.37976e-05
	CAGL0K08888g	-0.699385	2.70354e-08
	CAGL0J11132g	-0.698367	6.17762e-09
	CAGL0H00825g	-0.694422	0.000269801
	CAGL0L06666g	-0.693578	0.000271712
	CAGL0E06424g	-0.692287	4.0196e-07
	CAGL0H03773g	-0.691613	5.04108e-08
	CAGL0G09119g	-0.691585	0.000106685
	CAGL0L03586g	-0.69052	1.91019e-09
	CAGL0E02937g	-0.689539	7.70373e-05
	CAGL0L06314g	-0.687386	9.40563e-07
	CAGL0M00770g	-0.68655	1.28757e-08
	CAGL0C01221g	-0.686484	4.13144e-08
	CAGL0G03641g	-0.686335	9.52525e-09
	CAGL0K07832g	-0.685706	2.2715e-08
	CAGL0M00874g	-0.682233	8.75853e-06
	CAGL0I00572g	-0.681371	4.13812e-08
	CAGL0E05478g	-0.676317	2.54533e-06
	CAGL0J02128g	-0.67572	0.0342261
	CAGL0L10890g	-0.674591	3.31904e-07
	CAGL0F00429g	-0.674011	3.63875e-05
	CAGL0K06699g	-0.673388	4.91351e-06
	CAGL0M06083g	-0.672405	1.31182e-07
	CAGL0K11726g	-0.672348	2.43085e-07
	CAGL0M01804g	-0.67198	1.90762e-08
	CAGL0G01254g	-0.671564	2.53378e-08
	CAGL0F08107g	-0.671289	4.06317e-08
	CAGL0C03179g	-0.668964	2.68117e-07
	CAGL0G04851g	-0.668907	4.62197e-09
	CAGL0J04268g	-0.668857	2.19933e-05
	CAGL0G02453g	-0.668241	1.41584e-08
	CAGL0G03443g	-0.667786	7.35265e-07
	CAGL0D04834g	-0.667517	2.87689e-05
	CAGL0L13024g	-0.667171	1.85321e-05
	CAGL0G03311g	-0.666828	1.76027e-07
	CAGL0C01727g	-0.66652	6.48812e-07
	CAGL0K12826g	-0.66529	8.06841e-08
	CAGL0G02915g	-0.664026	3.88401e-09
	CAGL0B02431g	-0.659013	4.47659e-06
	CAGL0A03080g	-0.658265	0.00112879
	CAGL0M07722g	-0.656507	4.35791e-09
	CAGL0E01793g	-0.655319	4.59215e-06
	CAGL0F01991g	-0.654454	8.27079e-06
	CAGL0C05181g	-0.654301	1.54109e-06
	CAGL0I07975g	-0.653988	2.29843e-06
	CAGL0L00341g	-0.653107	4.86316e-06
	CAGL0L02799g	-0.652485	2.46103e-06
	CAGL0B04125g	-0.652218	2.73781e-06
	CAGL0M12188g	-0.65159	1.03993e-07
	CAGL0G06600g	-0.651121	2.9734e-05
	CAGL0I10791g	-0.65097	0.00369848
	CAGL0D03454g	-0.650602	4.38286e-07
	CAGL0J10032g	-0.65054	2.27368e-06
	CAGL0M12144g	-0.649197	2.5984e-08
	CAGL0A01045g	-0.648797	8.30928e-09
	CAGL0B03927g	-0.648775	1.56346e-05
	CAGL0B00352g	-0.647825	8.46208e-06
	CAGL0D01408g	-0.647476	5.0578e-07
	CAGL0G04631g	-0.646469	2.53915e-07
	CAGL0M12386g	-0.645715	2.47811e-07
	CAGL0F08525g	-0.644835	1.31387e-06
	CAGL0E00869g	-0.64477	8.21411e-07
	CAGL0H09196g	-0.643763	2.22347e-08
	CAGL0F04103g	-0.643707	5.01869e-06
	CAGL0K03861g	-0.642281	7.56433e-07
	CAGL0D06688g	-0.642158	6.1457e-07
	CAGL0L09867g	-0.640567	2.42771e-07
	CAGL0C04455g	-0.640411	1.02165e-05
	CAGL0K05071g	-0.640298	6.26845e-05
	CAGL0M10890g	-0.638703	2.45471e-06
	CAGL0K05813g	-0.637845	1.12321e-07
	CAGL0I05098g	-0.637084	1.95418e-07
	CAGL0G05445g	-0.636928	7.02158e-07
	CAGL0I06336g	-0.636288	1.80095e-06
	CAGL0J03476g	-0.634671	2.18239e-05
	CAGL0M07161g	-0.634668	1.62346e-06
	CAGL0G07843g	-0.632513	5.31388e-06
	CAGL0M13849g	-0.631482	2.46905e-06
	CAGL0A03608g	-0.630879	0.00042493
	CAGL0I08393g	-0.630192	6.43402e-08
	CAGL0L03872g	-0.62972	8.54501e-06
	CAGL0B01881g	-0.629432	1.33043e-06
	CAGL0B04961g	-0.628753	6.41357e-07
	CAGL0H08800g	-0.628062	6.41729e-06
	CAGL0G05467g	-0.626153	7.57054e-05
	CAGL0E05742g	-0.626064	1.18382e-07
	CAGL0H02607g	-0.625635	1.04979e-05
	CAGL0C03355g	-0.625075	1.61476e-05
	CAGL0I10648g	-0.624737	3.15715e-06
	CAGL0J07678g	-0.624609	1.40516e-07
	CAGL0K00495g	-0.624177	1.21752e-07
	CAGL0K09966g	-0.622803	6.69382e-07
	CAGL0K03685g	-0.620936	0.000680274
	CAGL0C04279g	-0.619873	6.3369e-05
	CAGL0B04433g	-0.619613	3.53254e-05
	CAGL0K10516g	-0.619246	2.33146e-05
	CAGL0D00550g	-0.617822	9.18461e-07
	CAGL0M02651g	-0.616775	5.57554e-06
	CAGL0M11880g	-0.616508	3.63875e-07
	CAGL0G05115g	-0.615904	1.35459e-05
	CAGL0H06281g	-0.615363	9.80364e-07
	CAGL0J10179g	-0.614394	4.0766e-07
	CAGL0D03190g	-0.613523	4.46618e-07
	CAGL0J07744g	-0.612275	1.006e-06
	CAGL0H07051g	-0.608312	8.4651e-06
	CAGL0M07227g	-0.607228	1.68724e-05
	CAGL0H06127g	-0.606908	5.3267e-07
	CAGL0M00638g	-0.60626	6.8987e-07
	CAGL0G07953g	-0.604912	0.000309036
	CAGL0D00726g	-0.604181	0.00218409
	CAGL0L10780g	-0.603536	2.45028e-07
	CAGL0L00825g	-0.603486	2.67388e-06
	CAGL0B00396g	-0.603188	8.62533e-07
	CAGL0H00935g	-0.602461	9.64828e-06
	CAGL0J02310g	-0.602191	8.7679e-05
	CAGL0L05544g	-0.600208	3.10787e-06
	CAGL0K06083g	-0.599578	0.00115573
	CAGL0J11748g	-0.599102	6.17305e-05
	CAGL0H04081g	-0.599021	1.0645e-06
	CAGL0K07964g	-0.598864	2.90867e-07
	CAGL0C04983g	-0.598815	9.02647e-07
	CAGL0J07810g	-0.598192	1.00897e-06
	CAGL0I02926g	-0.597818	6.82685e-07
	CAGL0J09680g	-0.596962	0.000535384
	CAGL0M13343g	-0.596825	2.60114e-07
	CAGL0J01848g	-0.595798	8.63799e-07
	CAGL0L10021g	-0.594469	1.20976e-06
	CAGL0K10582g	-0.594374	1.18056e-06
	CAGL0J06006g	-0.594335	0.000230287
	CAGL0I07777g	-0.59412	0.000746621
	CAGL0F07139g	-0.592763	8.18884e-06
	CAGL0L02871g	-0.591929	1.44024e-05
	CAGL0M05797g	-0.591111	0.0056018
	CAGL0D01826g	-0.590305	1.07619e-06
	CAGL0L02035g	-0.589896	2.20756e-06
	CAGL0K09328g	-0.58874	1.9019e-06
	CAGL0J09746g	-0.587998	5.28729e-05
	CAGL0J00341g	-0.587788	2.39314e-06
	CAGL0L04532g	-0.587572	5.28247e-06
	CAGL0I08327g	-0.587119	1.22578e-06
	CAGL0H05731g	-0.586442	2.71224e-06
	CAGL0D04004g	0.585362	9.8197e-06
	CAGL0E05170g	0.585581	3.15859e-05
	CAGL0A00935g	0.585655	0.00138748
	CAGL0L11726g	0.585841	2.19674e-05
	CAGL0M09669g	0.588451	6.84134e-05
	CAGL0J10296g	0.588834	0.000147521
	CAGL0H01573g	0.591572	0.000931943
	CAGL0K05995g	0.592068	7.30651e-07
	CAGL0L01683g	0.592729	0.0235891
	CAGL0K03839g	0.593786	0.00294332
	CAGL0B01078g	0.594171	2.03898e-05
	CAGL0B05049g	0.594896	4.54896e-07
	CAGL0H06633g	0.595887	0.00753872
	CAGL0A00715g	0.596121	0.0234015
	CAGL0G05313g	0.596303	3.55278e-07
	CAGL0L10582g	0.596889	0.000224074
	CAGL0H01837g	0.597247	6.84189e-05
	CAGL0K10384g	0.597948	0.000463122
	CAGL0I05170g	0.598359	1.16335e-06
	CAGL0E03025g	0.598897	3.03831e-05
	CAGL0E04070g	0.599164	8.46807e-06
	CAGL0C00209g	0.599628	0.000144361
	CAGL0I05104g	0.600869	0.000238846
	CAGL0D03762g	0.601178	0.0133363
	CAGL0J10868g	0.601482	0.0131048
	CAGL0M11418g	0.601553	4.24857e-05
	CAGL0L10714g	0.601893	1.07935e-06
	CAGL0G00858g	0.602641	8.11296e-05
	CAGL0B04411g	0.602723	0.000793824
	CAGL0B02948g	0.603369	0.0258186
	CAGL0L00473g	0.603445	0.00139298
	CAGL0D00330g	0.604311	1.6741e-05
	CAGL0M04763g	0.605493	0.00396408
	CAGL0J08547g	0.605604	0.00101085
	CAGL0A02728g	0.607002	8.6535e-06
	CAGL0F06325g	0.609035	1.47187e-05
	CAGL0K07458g	0.60908	9.9308e-06
	CAGL0I06226g	0.609149	0.00109365
	CAGL0M06347g	0.610059	3.8141e-05
	CAGL0H09768g	0.610076	2.53717e-06
	CAGL0J08932g	0.610508	0.00214192
	CAGL0H07667g	0.611678	0.000154698
	CAGL0G01474g	0.614279	0.000467011
	CAGL0K11682g	0.614517	0.00178428
	CAGL0E00605g	0.615088	2.65554e-05
	CAGL0G05676g	0.616487	0.00014256
	CAGL0L07480g	0.616852	3.159e-05
	CAGL0I08305g	0.617801	3.40457e-05
	CAGL0G00968g	0.618371	6.79814e-05
	CAGL0M09867g	0.619073	0.0146604
	CAGL0E04158g	0.619838	0.000734369
	CAGL0C04092g	0.620201	9.77888e-05
	CAGL0K04983g	0.62078	0.000440205
	CAGL0F05049g	0.622315	0.00197369
	CAGL0K07766g	0.622605	1.74576e-07
	CAGL0J08481g	0.623202	0.000106126
	CAGL0F01815g	0.62454	0.000199867
	CAGL0F04917g	0.624614	0.00708338
	CAGL0F05687g	0.624988	2.18966e-05
	CAGL0D06468g	0.625911	0.00818348
	CAGL0D05324g	0.625965	1.33685e-06
	CAGL0H10428g	0.626344	2.12433e-06
	CAGL0G01320g	0.629062	3.47946e-06
	CAGL0K12540g	0.629076	0.00238538
	CAGL0K02585g	0.631269	0.000203474
	CAGL0H10120g	0.631608	5.59237e-05
	CAGL0J06270g	0.632112	0.000426335
	CAGL0J09350g	0.632754	1.10213e-07
	CAGL0I00528g	0.632951	0.0020788
	CAGL0H07557g	0.635412	6.58261e-06
	CAGL0K07678g	0.635624	0.0328006
	CAGL0L12276g	0.635703	7.22287e-07
	CAGL0E03421g	0.636565	0.000422675
	CAGL0C04829g	0.637347	0.00580228
	CAGL0M03047g	0.639907	3.55719e-05
	CAGL0M00550g	0.640027	0.000101352
	CAGL0H09636g	0.64098	0.000106582
	CAGL0J05082g	0.641439	0.000129099
	CAGL0L06864g	0.641663	0.00510047
	CAGL0I01012g	0.6418	0.000174055
	CAGL0C01903g	0.643539	0.00010254
	CAGL0M09515g	0.644289	6.42436e-06
	CAGL0D02926g	0.644597	1.18662e-06
	CAGL0G07733g	0.644927	5.56447e-05
	CAGL0C04609g	0.645862	3.08768e-06
	CAGL0M00968g	0.645895	0.000495905
	CAGL0K08602g	0.646237	0.0043201
	CAGL0H00528g	0.646321	0.000355323
	CAGL0G01562g	0.646367	0.00109208
	CAGL0J07282g	0.648831	0.00139679
	CAGL0M14025g	0.652057	2.70888e-07
	CAGL0F07029g	0.654586	0.000682949
	CAGL0K02101g	0.65528	4.2287e-06
	CAGL0M01320g	0.655548	2.66453e-06
	CAGL0F01881g	0.655618	0.0045147
	CAGL0B01925g	0.65692	0.000316047
	CAGL0I05852g	0.65753	3.11604e-06
	CAGL0L08250g	0.657645	3.72227e-08
	CAGL0G04191g	0.660312	0.000326964
	CAGL0L03355g	0.661989	9.08565e-05
	CAGL0H07139g	0.662737	0.00111158
	CAGL0L01771g	0.662748	4.49105e-05
	CAGL0E05654g	0.667239	5.40529e-06
	CAGL0M11528g	0.667766	0.00160751
	CAGL0H01793g	0.668519	8.0425e-07
	CAGL0M06545g	0.668778	6.22604e-06
	CAGL0B02739g	0.669219	1.39564e-06
	CAGL0C04191g	0.66978	0.000236085
	CAGL0L01177g	0.670749	2.42801e-07
	CAGL0I09636g	0.671217	3.84639e-05
	CAGL0M12969g	0.67185	0.000703139
	CAGL0J03806g	0.672294	6.3371e-08
	CAGL0L05896g	0.672634	0.000409741
	CAGL0E01859g	0.672659	0.0178602
	CAGL0E01243g	0.673975	1.88562e-05
	CAGL0J00561g	0.674547	4.26489e-06
	CAGL0F09185g	0.675917	0.000541873
	CAGL0D06138g	0.676441	4.64207e-07
	CAGL0G07623g	0.676856	1.02786e-05
	CAGL0H04103g	0.677097	1.02778e-06
	CAGL0L02321g	0.679639	0.000175222
	CAGL0B00616g	0.681082	0.000132771
	CAGL0G09493g	0.682726	2.38029e-07
	CAGL0L08668g	0.685297	1.36919e-05
	CAGL0L03267g	0.685764	0.00126132
	CAGL0M01628g	0.686033	1.90645e-07
	CAGL0C01837g	0.686103	0.00027376
	CAGL0M05467g	0.687394	0.00110642
	CAGL0H05005g	0.687543	1.99331e-07
	CAGL0M06897g	0.687908	0.00397147
	CAGL0H04631g	0.688765	3.38439e-07
	CAGL0G07689g	0.689779	5.07904e-06
	CAGL0G05357g	0.690778	0.000171308
	CAGL0K07007g	0.690816	1.00169e-08
	CAGL0J08371g	0.694632	0.0115152
	CAGL0M09493g	0.696092	0.000694108
	CAGL0L04598g	0.696243	0.000335279
	CAGL0L02167g	0.697851	6.12297e-05
	CAGL0C02321g	0.698441	0.000190201
	CAGL0L12584g	0.699073	3.63652e-06
	CAGL0J08096g	0.700532	1.17659e-06
	CAGL0B03899g	0.700568	0.0326995
	CAGL0C01991g	0.701883	0.000289969
	CAGL0E04774g	0.704933	5.44865e-07
	CAGL0L00957g	0.705284	2.81497e-05
	CAGL0G04499g	0.705699	2.26308e-07
	CAGL0F03003g	0.706441	1.47992e-05
	CAGL0J05874g	0.706756	2.48235e-05
	CAGL0D06490g	0.708427	8.89099e-05
	CAGL0L02607g	0.709075	0.00228248
	CAGL0C00319g	0.709304	8.67378e-09
	CAGL0L12628g	0.711329	9.05993e-05
	CAGL0L13299g	0.711759	0.00398262
	CAGL0L04664g	0.711906	0.000154607
	CAGL0L03157g	0.713084	0.00829413
	CAGL0A02475g	0.713361	5.14866e-08
	CAGL0K10714g	0.713574	0.000481417
	CAGL0K04301g	0.714183	0.000576627
	CAGL0F07799g	0.715035	2.62073e-09
	CAGL0G03223g	0.715442	3.19949e-05
	CAGL0L09108g	0.715554	1.61763e-06
	CAGL0E03630g	0.716168	4.09966e-05
	CAGL0C02893g	0.719233	5.12484e-09
	CAGL0M01452g	0.719373	5.81153e-05
	CAGL0M08228g	0.720659	1.78333e-05
	CAGL0D02420g	0.721473	0.0142799
	CAGL0M13981g	0.721509	2.30982e-07
	CAGL0A04477g	0.721775	4.99664e-08
	CAGL0H05621g	0.721817	1.47265e-07
	CAGL0K01683g	0.72322	1.59606e-08
	CAGL0F08327g	0.72991	0.000166684
	CAGL0J11891g	0.731537	7.21256e-07
	CAGL0I02970g	0.732022	1.60938e-08
	CAGL0G06182g	0.735187	0.000718692
	CAGL0M08206g	0.735501	1.8839e-10
	CAGL0I04224g	0.73588	3.62464e-08
	CAGL0L02519g	0.735972	1.79055e-05
	CAGL0M07205g	0.735996	9.13407e-06
	CAGL0K10494g	0.736693	1.85505e-09
	CAGL0G03179g	0.73723	3.9008e-09
	CAGL0H05115g	0.738424	0.000105888
	CAGL0J05159g	0.739451	0.00132825
	CAGL0M05115g	0.741159	0.0438773
	CAGL0L10362g	0.743216	8.76231e-08
	CAGL0I05478g	0.743238	4.92118e-08
	CAGL0I01694g	0.746575	5.98077e-09
	CAGL0K10978g	0.746887	1.53424e-07
	CAGL0C01771g	0.747035	6.7699e-06
	CAGL0H07315g	0.747838	0.000722618
	CAGL0J04158g	0.750472	1.99423e-08
	CAGL0F01859g	0.750587	0.000946501
	CAGL0C00847g	0.750716	2.13442e-07
	CAGL0H08107g	0.75133	0.000924539
	CAGL0I01958g	0.752706	1.5763e-07
	CAGL0F03619g	0.753795	0.000114264
	CAGL0I05544g	0.755841	1.39255e-07
	CAGL0M03971g	0.756105	8.44689e-05
	CAGL0M13761g	0.756698	3.79668e-10
	CAGL0J02904g	0.759527	1.85425e-05
	CAGL0D00352g	0.760488	5.50007e-06
	CAGL0K05841g	0.761218	2.35737e-08
	CAGL0D01276g	0.762319	1.13404e-08
	CAGL0E05918g	0.76267	4.52761e-07
	CAGL0G05329g	0.764257	0.00241197
	CAGL0G04697g	0.765647	1.79878e-07
	CAGL0M02189g	0.769549	1.3921e-07
	CAGL0H03113g	0.769769	1.88762e-06
	CAGL0G05423g	0.770224	0.0006921
	CAGL0L03135g	0.77023	3.7769e-07
	CAGL0J00715g	0.771684	0.0323891
	CAGL0C03509g	0.77318	2.64262e-10
	CAGL0L10802g	0.773829	0.00996167
	CAGL0J01397g	0.777817	0.000148659
	CAGL0E03498g	0.778312	0.00309843
	CAGL0K12760g	0.7792	5.63749e-08
	CAGL0M14091g	0.780224	0.000257459
	CAGL0I10604g	0.780405	0.00203183
	CAGL0F08085g	0.780463	1.96832e-07
	CAGL0G07667g	0.788745	9.9805e-09
	CAGL0M07568g	0.793655	0.000590045
	CAGL0H10186g	0.795116	5.11561e-10
	CAGL0J07304g	0.798531	2.08065e-05
	CAGL0J11176g	0.80171	3.15078e-08
	CAGL0G07601g	0.801716	7.11786e-11
	CAGL0I05060g	0.802272	5.72209e-10
	CAGL0L02541g	0.803641	1.1684e-06
	CAGL0I02464g	0.80452	1.02018e-07
	CAGL0J08910g	0.80664	2.04463e-06
	CAGL0L02937g	0.808243	0.000668705
	CAGL0B03311g	0.808607	3.32452e-06
	CAGL0F05137g	0.811105	0.00272448
	CAGL0K05863g	0.811356	4.49045e-06
	CAGL0K09504g	0.811854	9.69627e-06
	CAGL0A01584g	0.814508	0.00143046
	CAGL0F07293g	0.816484	1.48408e-10
	CAGL0I10246g	0.817155	0.00177262
	CAGL0L08712g	0.81821	5.55113e-09
	CAGL0M01892g	0.818978	0.0208087
	CAGL0M11704g	0.821715	4.70756e-12
	CAGL0G07175g	0.826809	0.000285867
	CAGL0I02530g	0.826884	7.65395e-07
	CAGL0F03157g	0.827346	3.00215e-10
	CAGL0I10582g	0.828005	5.36062e-06
	CAGL0H06831g	0.828302	0.00108301
	CAGL0L01507g	0.829814	1.76663e-10
	CAGL0J07700g	0.83194	0.00116061
	CAGL0I09702g	0.837427	1.34411e-05
	CAGL0I05676g	0.839333	1.08171e-05
	CAGL0B04367g	0.839986	2.62125e-08
	CAGL0E00627g	0.84051	2.36517e-06
	CAGL0L05786g	0.842989	0.00233789
	CAGL0G00946g	0.846089	1.03413e-06
	CAGL0A02981g	0.847968	0.0346218
	CAGL0M06105g	0.848117	6.7078e-08
	CAGL0L06006g	0.850391	1.60856e-10
	CAGL0M07001g	0.850706	3.13414e-05
	CAGL0J09262g	0.851021	2.23003e-06
	CAGL0J04686g	0.853655	3.80916e-05
	CAGL0M07007g	0.855185	9.7296e-08
	CAGL0H10010g	0.861458	0.000260214
	CAGL0H09504g	0.861746	1.38693e-08
	CAGL0A04829g	0.862653	8.39674e-10
	CAGL0A03740g	0.867774	7.76696e-09
	CAGL0H08558g	0.868217	1.28964e-09
	CAGL0M13651g	0.868268	3.91091e-09
	CAGL0K11616g	0.871037	1.0807e-07
	CAGL0M03366g	0.874052	0.011935
	CAGL0A02816g	0.874988	2.53601e-10
	CAGL0G00264g	0.875542	9.26173e-11
	CAGL0M05533g	0.875782	1.22739e-09
	CAGL0L00803g	0.878084	4.08427e-06
	CAGL0E01705g	0.87877	3.45028e-10
	CAGL0K09350g	0.879535	1.07747e-09
	CAGL0G05830g	0.880078	2.39876e-07
	CAGL0M12793g	0.880394	9.74431e-05
	CAGL0H06919g	0.882343	3.64921e-13
	CAGL0L09383g	0.887612	4.11516e-09
	CAGL0C02739g	0.892147	1.22957e-07
	CAGL0K05247g	0.892325	0.000219864
	CAGL0B03839g	0.893164	2.98964e-07
	CAGL0M07634g	0.893675	0.00139327
	CAGL0I06787g	0.893688	5.44299e-10
	CAGL0D01518g	0.893858	0.000160789
	CAGL0L10208g	0.898165	5.05596e-12
	CAGL0K04631g	0.90138	1.20793e-06
	CAGL0I04048g	0.902125	0.000479646
	CAGL0I09108g	0.904108	8.01219e-08
	CAGL0I00330g	0.904566	7.8389e-10
	CAGL0M02079g	0.907535	1.24396e-09
	CAGL0L00649g	0.907875	4.80219e-09
	CAGL0G09064g	0.91058	0.000916271
	CAGL0M11682g	0.913079	1.99513e-06
	CAGL0C05027g	0.915594	3.07089e-06
	CAGL0J07436g	0.917879	6.83664e-13
	CAGL0F05841g	0.918682	0.000181897
	CAGL0B04103g	0.919562	7.79032e-10
	CAGL0K00803g	0.922327	1.30433e-14
	CAGL0G04763g	0.927465	1.78775e-10
	CAGL0I09460g	0.927479	3.9305e-08
	CAGL0E06600g	0.927495	1.15855e-09
	CAGL0L04686g	0.928573	0.00356396
	CAGL0G04433g	0.930812	1.20441e-13
	CAGL0I10362g	0.933313	0.00485377
	CAGL0M12474g	0.937124	5.60885e-09
	CAGL0E01419g	0.937909	3.26224e-09
	CAGL0H08888g	0.93974	9.47065e-07
	CAGL0L06402g	0.94275	2.56135e-14
	CAGL0I10054g	0.943505	1.55047e-07
	CAGL0B03619g	0.943674	8.83114e-12
	CAGL0H00418g	0.943722	4.17292e-09
	CAGL0A01628g	0.944077	3.86571e-14
	CAGL0M02211g	0.944881	1.93468e-11
	CAGL0M14069g	0.947358	1.74524e-08
	CAGL0C04631g	0.949419	9.50134e-09
	CAGL0D02134g	0.950347	7.00487e-07
	CAGL0D02486g	0.950587	3.9332e-13
	CAGL0I01276g	0.960232	6.52754e-05
	CAGL0J09372g	0.962692	1.10888e-15
	CAGL0H03091g	0.963113	9.97079e-10
	CAGL0L06974g	0.964142	1.91689e-13
	CAGL0L13090g	0.969107	1.74531e-07
	CAGL0M09339g	0.970417	5.51008e-10
	CAGL0C05445g	0.971417	2.20443e-10
	CAGL0C00946g	0.973649	0.00707889
	CAGL0E00649g	0.985137	3.50632e-16
	CAGL0F05027g	0.986	0.000219172
	CAGL0L10692g	0.987386	4.22122e-07
	CAGL0K11110g	0.987888	9.06641e-12
	CAGL0G04741g	0.989057	2.17054e-09
	CAGL0B04763g	0.991506	6.10019e-08
	CAGL0H09944g	0.992133	4.99879e-12
	CAGL0G09977g	0.995824	1.00955e-07
	CAGL0J03740g	0.998678	0.00242823
	CAGL0I03850g	0.999142	5.18281e-11
	CAGL0I07711g	1.00162	2.38689e-06
	CAGL0F03047g	1.00509	1.09107e-12
	CAGL0D05280g	1.00865	1.02878e-09
	CAGL0M12496g	1.0094	6.91631e-13
	CAGL0J03542g	1.01354	6.964e-09
	CAGL0K01155g	1.02176	8.7184e-12
	CAGL0I04246g	1.02495	7.96506e-10
	CAGL0M07403g	1.02517	2.41139e-08
	CAGL0A01177g	1.02971	2.49883e-12
	CAGL0K01705g	1.03789	5.88663e-12
	CAGL0D01474g	1.03796	1.80315e-07
	CAGL0G02585g	1.04	2.05768e-07
	CAGL0E05456g	1.04133	1.56871e-10
	CAGL0M13541g	1.04201	3.72664e-15
	CAGL0B02882g	1.04564	6.29555e-06
	CAGL0E04488g	1.04565	1.58122e-14
	CAGL0H10274g	1.04659	1.15737e-11
	CAGL0C04004g	1.04951	6.83905e-07
	CAGL0I03586g	1.05525	0.0236189
	CAGL0A04081g	1.05841	5.47223e-19
	CAGL0K03377g	1.0621	9.23813e-20
	CAGL0E00187g	1.06262	2.55598e-10
	CAGL0H07997g	1.07099	2.27069e-14
	CAGL0J07590g	1.07304	2.52821e-14
	CAGL0A04675g	1.07466	1.82987e-06
	CAGL0D00264g	1.07594	1.44012e-06
	CAGL0A01606g	1.07816	1.91628e-06
	CAGL0K09372g	1.08147	1.27999e-08
	CAGL0H03971g	1.08232	2.01175e-06
	CAGL0D06600g	1.08348	4.96138e-12
	CAGL0A01366g	1.08633	7.93097e-07
	CAGL0F01419g	1.08749	2.64728e-11
	CAGL0K11638g	1.08948	0.00629409
	CAGL0K04719g	1.09194	9.83713e-11
	CAGL0L06776g	1.09449	6.28886e-07
	CAGL0K08206g	1.09652	1.78997e-09
	CAGL0A01870g	1.10066	2.50094e-15
	CAGL0J01441g	1.1022	1.69833e-13
	CAGL0L05324g	1.10695	0.0497299
	CAGL0M05687g	1.1111	3.11379e-12
	CAGL0E04004g	1.1111	1.69725e-08
	CAGL0L10318g	1.11269	2.22007e-17
	CAGL0L09999g	1.11527	1.00816e-08
	CAGL0J01870g	1.11641	3.49039e-15
	CAGL0E00891g	1.11928	3.45579e-16
	CAGL0M02101g	1.12598	4.26192e-13
	CAGL0H03135g	1.12659	8.66202e-07
	CAGL0B02343g	1.12691	2.99238e-06
	CAGL0I09009g	1.13654	3.22174e-12
	CAGL0L11902g	1.13744	1.22655e-07
	CAGL0F02101g	1.13996	1.52015e-15
	CAGL0M08184g	1.14036	7.25048e-06
	CAGL0D03344g	1.14594	2.01249e-16
	CAGL0K04169g	1.14885	1.70336e-13
	CAGL0C02783g	1.15019	0.0322176
	CAGL0K12782g	1.15092	1.40351e-13
	CAGL0C04543g	1.1523	9.63581e-14
	CAGL0D06512g	1.15262	1.77589e-13
	CAGL0E01881g	1.1536	6.31969e-14
	CAGL0F00187g	1.1557	1.18059e-11
	CAGL0E05588g	1.16108	3.94636e-13
	CAGL0D05236g	1.16574	3.90069e-07
	CAGL0E01529g	1.16737	1.07874e-11
	CAGL0G01540g	1.17038	1.71973e-14
	CAGL0J08613g	1.17267	1.41044e-12
	CAGL0H02387g	1.17349	0.00984114
	CAGL0L09493g	1.17522	6.1628e-11
	CAGL0F08261g	1.17558	1.88046e-06
	CAGL0L00227g	1.17829	3.07983e-08
	CAGL0B02904g	1.18301	0.0015328
	CAGL0K06380g	1.1866	5.57381e-05
	CAGL0G04279g	1.18696	6.31681e-07
	CAGL0F07953g	1.1896	0.00238863
	CAGL0K12254g	1.19038	2.04051e-19
	CAGL0C02981g	1.19189	5.91344e-16
	CAGL0J10846g	1.19374	3.10551e-14
	CAGL0J09416g	1.19965	3.48528e-14
	CAGL0J11242g	1.20146	1.26324e-17
	CAGL0I03872g	1.20397	4.25002e-18
	CAGL0F05071g	1.20437	1.24851e-06
	CAGL0L07898g	1.20589	2.92179e-07
	CAGL0G06798g	1.21079	9.11249e-11
	CAGL0K08272g	1.21121	6.01115e-20
	CAGL0H06853g	1.21512	1.96237e-20
	CAGL0F00605g	1.21732	6.89731e-13
	CAGL0D06006g	1.22009	9.84649e-19
	CAGL0F02651g	1.2204	2.9442e-05
	CAGL0J07414g	1.22065	1.87411e-12
	CAGL0E00803g	1.22228	8.34896e-12
	CAGL0F00869g	1.22571	3.067e-08
	CAGL0L03696g	1.22629	5.66229e-08
	CAGL0H03619g	1.22701	2.4784e-14
	CAGL0E05610g	1.23229	2.99807e-10
	CAGL0J11968g	1.23234	3.4698e-09
	CAGL0I04972g	1.23728	3.6753e-06
	CAGL0D02728g	1.24405	1.80721e-17
	CAGL0H09966g	1.24576	3.73655e-10
	CAGL0M04103g	1.24802	2.38585e-10
	CAGL0M07359g	1.25218	0.00164599
	CAGL0K03421g	1.25232	2.08773e-08
	CAGL0C04323g	1.25323	1.18546e-13
	CAGL0E00583g	1.2554	2.80063e-15
	CAGL0L09273g	1.26174	3.34176e-06
	CAGL0J05060g	1.26494	3.42231e-15
	CAGL0D06402g	1.26601	3.25998e-12
	CAGL0I10098g	1.26646	4.28755e-13
	CAGL0M11462g	1.27028	1.49315e-18
	CAGL0G02321g	1.27386	1.12279e-10
	CAGL0B00462g	1.27826	0.0366115
	CAGL0G02937g	1.282	6.04828e-06
	CAGL0L01485g	1.28816	8.31725e-19
	CAGL0L02101g	1.28825	3.80772e-21
	CAGL0D05566g	1.29135	2.00938e-17
	CAGL0J09284g	1.30218	2.32406e-11
	CAGL0G08646g	1.30251	5.73318e-14
	CAGL0B03421g	1.30674	9.52651e-20
	CAGL0F08217g	1.31749	0.033939
	CAGL0H06545g	1.32288	3.13532e-13
	CAGL0I04862g	1.32389	5.21966e-29
	CAGL0G05984g	1.32892	2.42898e-06
	CAGL0D00154g	1.33057	1.35454e-05
	CAGL0J05852g	1.33118	1.94245e-16
	CAGL0C04587g	1.33525	4.87527e-12
	CAGL0K06677g	1.33696	1.16066e-06
	CAGL0A01284g	1.34447	7.11917e-11
	CAGL0K04477g	1.35849	1.03042e-16
	CAGL0K12958g	1.36558	6.78139e-15
	CAGL0M03839g	1.37479	4.26457e-26
	CAGL0H05995g	1.38142	0.0053824
	CAGL0F02167g	1.38232	0.0214779
	CAGL0K03333g	1.38241	1.28787e-26
	CAGL0I10211g	1.3832	2.0995e-07
	CAGL0A00649g	1.38452	0.0285116
	CAGL0J07084g	1.40113	7.06406e-15
	CAGL0K00341g	1.4144	2.40166e-07
	CAGL0J03960g	1.41525	2.67374e-22
	CAGL0G05247g	1.41661	1.76294e-25
	CAGL0B02755g	1.42271	8.23573e-16
	CAGL0F07865g	1.4228	5.56221e-19
	CAGL0K05390g	1.42643	2.7416e-24
	CAGL0L02079g	1.43438	8.20977e-10
	CAGL0L05258g	1.4378	3.61059e-12
	CAGL0L11286g	1.43811	2.31874e-06
	CAGL0M01870g	1.45035	1.96345e-07
	CAGL0L13431g	1.45521	9.14895e-05
	CAGL0K07634g	1.45539	3.30324e-05
	CAGL0G06006g	1.46445	2.79346e-14
	CAGL0D04708g	1.46819	3.09451e-16
	CAGL0A00429g	1.47163	1.14977e-37
	CAGL0E01815g	1.47653	6.68072e-14
	CAGL0M10395g	1.47838	7.84047e-09
	CAGL0H10450g	1.47984	0.0377884
	CAGL0L06094g	1.49688	7.07468e-06
	CAGL0E03762g	1.49977	6.07502e-24
	CAGL0J09174g	1.50458	0.00193935
	CAGL0B03663g	1.50846	2.16685e-13
	CAGL0M00132g	1.50901	7.87108e-14
	CAGL0G08624g	1.51393	5.47834e-33
	CAGL0E04334g	1.52397	9.15369e-31
	CAGL0K08338g	1.52608	6.2724e-15
	CAGL0H02563g	1.53602	0.00491843
	CAGL0I06809g	1.53948	2.8e-18
	CAGL0I09724g	1.54986	1.24243e-08
	CAGL0G09042g	1.55681	7.00436e-11
	CAGL0I00506g	1.57239	1.01739e-27
	CAGL0A03410g	1.58272	0.000599548
	CAGL0L06512g	1.58798	1.22601e-06
	CAGL0L02827g	1.59118	1.05125e-30
	CAGL0L09086g	1.59446	5.96405e-16
	CAGL0J11946g	1.60045	0.0407508
	CAGL0H02959g	1.60154	9.76167e-10
	CAGL0K12100g	1.60247	9.79649e-29
	CAGL0H08261g	1.60623	6.37924e-14
	CAGL0M14047g	1.61215	1.44778e-15
	CAGL0E01837g	1.62024	8.8505e-28
	CAGL0I07425g	1.62196	0.00254504
	CAGL0I08591g	1.62268	9.61876e-30
	CAGL0L01463g	1.62504	2.11906e-06
	CAGL0K08536g	1.64273	2.47019e-18
	CAGL0E02651g	1.6539	2.78704e-10
	CAGL0C00275g	1.67763	1.13025e-23
	CAGL0E00275g	1.69805	2.8249e-23
	CAGL0G05698g	1.69854	0.000147145
	CAGL0A02145g	1.7009	0.000456267
	CAGL0H01661g	1.70183	0.00484191
	CAGL0C02365g	1.70498	3.18073e-07
	CAGL0H07601g	1.71484	3.40108e-09
	CAGL0B04675g	1.71681	7.5685e-13
	CAGL0K01771g	1.71696	4.31373e-14
	CAGL0L12012g	1.72776	2.96026e-12
	CAGL0H00704g	1.7283	1.76095e-21
	CAGL0K07381g	1.73927	0.00255466
	CAGL0I06050g	1.74112	4.96713e-28
	CAGL0I06644g	1.74427	0.00297251
	CAGL0J01331g	1.74613	2.44108e-26
	CAGL0E05148g	1.75183	5.16309e-29
	CAGL0J01463g	1.78552	4.11842e-09
	CAGL0K09218g	1.78954	8.91785e-23
	CAGL0L09537g	1.79307	1.56061e-05
	CAGL0K03459g	1.79464	1.93849e-09
	CAGL0J09944g	1.79761	3.03758e-42
	CAGL0K03509g	1.80123	3.50687e-45
	CAGL0C03916g	1.81425	3.50596e-21
	CAGL0M03465g	1.83699	7.70994e-10
	CAGL0M01716g	1.83801	1.65154e-12
	CAGL0J02706g	1.83929	5.45172e-06
	CAGL0I08151g	1.86915	4.83689e-10
	CAGL0A00341g	1.87872	4.18635e-10
	CAGL0I02024g	1.88006	3.30493e-11
	CAGL0K08668g	1.88294	0.0321751
	CAGL0F08195g	1.89022	0.000438869
	CAGL0J05830g	1.90418	5.98972e-23
	CAGL0B01595g	1.91927	1.00151e-14
	CAGL0H03311g	1.9232	7.64868e-06
	CAGL0J09020g	1.92825	1.96115e-30
	CAGL0I02046g	1.93067	7.80821e-41
	CAGL0G06050g	1.99866	0.000443522
	CAGL0F01793g	2.00274	4.03875e-32
	CAGL0I09834g	2.01393	0.0246289
	CAGL0K11946g	2.01399	6.70865e-13
	CAGL0G04455g	2.01797	6.41659e-05
	CAGL0F07777g	2.0363	0.00190703
	CAGL0B04455g	2.043	4.43616e-13
	CAGL0K03355g	2.04845	0.0203457
	CAGL0M13365g	2.05513	1.77288e-16
	CAGL0D06666g	2.05598	0.000509116
	CAGL0G06996g	2.06137	0.00367882
	CAGL0M06435g	2.06371	3.31299e-09
	CAGL0K12716g	2.08364	2.32942e-05
	CAGL0K00363g	2.09805	1.21627e-31
	CAGL0M03003g	2.10858	1.59751e-22
	CAGL0A02343g	2.10919	2.47403e-05
	CAGL0L10186g	2.11845	3.39153e-41
	CAGL0D05940g	2.1185	1.72955e-54
	CAGL0M10153g	2.12279	1.38128e-05
	CAGL0M09020g	2.14225	1.29107e-06
	CAGL0L06072g	2.15273	6.79565e-10
	CAGL0C05577g	2.15279	6.53098e-09
	CAGL0D05104g	2.16029	6.32056e-06
	CAGL0E01749g	2.16681	4.19748e-10
	CAGL0F07117g	2.20048	6.3213e-23
	CAGL0H07645g	2.20702	2.57468e-05
	CAGL0A02002g	2.21385	5.59537e-11
	CAGL0H04851g	2.22637	3.64652e-42
	CAGL0D03608g	2.24341	3.08775e-17
	CAGL0L05720g	2.2537	6.94168e-13
	CAGL0J05962g	2.26052	1.4027e-33
	CAGL0H10164g	2.27103	0.000615212
	CAGL0D04026g	2.30011	6.25366e-23
	CAGL0L10142g	2.34931	9.79009e-56
	CAGL0E04554g	2.36222	1.20046e-05
	CAGL0E06644g	2.36366	4.232e-61
	CAGL0H02101g	2.38187	5.51826e-05
	CAGL0I02134g	2.38761	4.61959e-12
	CAGL0D05654g	2.38939	4.76072e-06
	CAGL0I04840g	2.4073	9.66401e-30
	CAGL0K03905g	2.41479	0.00342191
	CAGL0K01727g	2.4196	8.12507e-88
	CAGL0G05544g	2.43846	0.000365431
	CAGL0I07249g	2.46747	2.56354e-30
	CAGL0H09262g	2.47633	1.25354e-13
	CAGL0M09735g	2.49287	3.1221e-64
	CAGL0D05082g	2.50258	3.02639e-62
	CAGL0G02563g	2.53303	5.49659e-10
	CAGL0H06039g	2.55126	1.41993e-25
	CAGL0M11902g	2.5575	9.77451e-62
	CAGL0B02926g	2.57618	0.00451124
	CAGL0A01650g	2.61059	1.90491e-100
	CAGL0K10428g	2.61061	0.000179125
	CAGL0K09702g	2.67173	9.37029e-51
	CAGL0L12518g	2.68185	0.00528291
	CAGL0B02079g	2.73012	1.78694e-07
	CAGL0C05467g	2.76435	0.03986
	CAGL0B01012g	2.81164	1.39116e-23
	CAGL0J03916g	2.81629	6.20078e-80
	CAGL0J06402g	2.84873	1.24973e-09
	CAGL0M07744g	2.88016	1.8118e-20
	CAGL0I00286g	2.89099	3.54465e-06
	CAGL0J03080g	2.89718	0.000384665
	CAGL0H08844g	2.90096	1.07578e-09
	CAGL0M11660g	2.93521	3.60771e-07
	CAGL0I10010g	2.94346	1.18999e-25
	CAGL0G03289g	2.94847	2.22697e-70
	CAGL0M12551g	2.95656	6.70628e-28
	CAGL0L11990g	2.98693	1.81968e-18
	CAGL0M08426g	2.98736	3.80181e-99
	CAGL0D01694g	2.98746	3.71826e-05
	CAGL0D05918g	2.99182	2.50174e-138
	CAGL0G01122g	3.00237	2.18154e-46
	CAGL0D02662g	3.03786	0.0099911
	CAGL0F02057g	3.04336	8.58014e-06
	CAGL0M13387g	3.06994	0.00702978
	CAGL0D00946g	3.07258	2.03388e-36
	CAGL0B00726g	3.08019	1.73655e-21
	CAGL0M00704g	3.12377	0.0395882
	CAGL0H03575g	3.17849	1.50471e-71
	CAGL0I05610g	3.19166	1.90997e-43
	CAGL0A00451g	3.19197	3.4331e-161
	CAGL0L06050g	3.20616	8.10325e-06
	CAGL0J00451g	3.24563	1.604e-27
	CAGL0G04785g	3.2611	0.0466379
	CAGL0F00649g	3.27424	3.15571e-24
	CAGL0M02915g	3.28046	0.00594871
	CAGL0B00715g	3.34124	2.47278e-33
	CAGL0H09922g	3.34501	2.00087e-06
	CAGL0F01485g	3.39168	4.97798e-79
	CAGL0G02739g	3.48664	5.91425e-08
	CAGL0A01089g	3.52894	3.01246e-124
	CAGL0K00715g	3.67442	5.75765e-123
	CAGL0E01727g	3.68132	6.47539e-07
	CAGL0C03289g	3.7776	1.59393e-210
	CAGL0K00170g	3.78093	3.10588e-39
	CAGL0L05434g	3.79099	8.9954e-146
	CAGL0A01826g	3.80306	3.12903e-55
	CAGL0M05401g	3.80671	1.87826e-22
	CAGL0D02640g	3.85149	0.00193851
	CAGL0J04004g	3.88741	4.51227e-12
	CAGL0G10219g	3.91576	0.0411262
	CAGL0C03872g	3.91852	2.45959e-116
	CAGL0G00242g	3.97097	7.34201e-262
	CAGL0M01760g	4.13018	4.04412e-272
	CAGL0F08745g	4.19493	7.21415e-114
	CAGL0H07469g	4.26068	3.6841e-08
	CAGL0M03421g	4.34647	0.00109864
	CAGL0I02596g	4.41268	0.000566473
	CAGL0K05687g	4.43566	1.19237e-32
	CAGL0E05984g	4.56612	1.62231e-58
	CAGL0L08547g	4.57299	7.96634e-56
	CAGL0I08943g	4.57692	3.16452e-35
	CAGL0F02717g	4.64966	1.1536e-197
	CAGL0H09614g	4.72036	1.14889e-81
	CAGL0M11000g	4.74709	2.44353e-14
	CAGL0M12815g	4.75365	8.73794e-19
	CAGL0M09713g	4.81413	0
	CAGL0D06380g	4.86212	1.08478e-06
	CAGL0E03366g	4.96333	4.02396e-14
	CaglfMp04	5.00241	0.0168856
	CAGL0J11550g	5.05093	5.49838e-15
	CAGL0H09592g	5.10605	7.57478e-57
	CAGL0F04631g	5.29528	2.76075e-18
	CAGL0M11044g	5.32803	1.63175e-23
	CAGL0G05269g	5.41259	1.0933e-34
	CAGL0B03223g	5.64962	0.00334879
	CAGL0B02651g	5.73617	0.00211027
	CAGL0E00231g	7.00901	3.97934e-288
	CAGL0H00110g	7.23392	1.3689e-16
	CAGL0M12947g	7.38827	0

## Sheet: GO_Up_genes_WT
Supplementary file 12 - List of enriched GO terms from upregulated genes upon fluconazole treatment in wildtype C. glabrata cells
S.no.	ID	Description	P-value	Number of genes in the background	Number of upregulated genes	Up-regulated genes
1	GO:0042908	xenobiotic transport	0	12	8	CAGL0B02343g/CAGL0I04862g/CAGL0G08624g/CAGL0J09944g/CAGL0H06039g/CAGL0G00242g/CAGL0M01760g/CAGL0F02717g
2	GO:0030476	ascospore wall assembly	0.0001	45	16	CAGL0B00616g/CAGL0D06490g/CAGL0F01859g/CAGL0L10802g/CAGL0J03740g/CAGL0F02651g/CAGL0F00869g/CAGL0G05984g/CAGL0G08624g/CAGL0H01661g/CAGL0M13365g/CAGL0C05577g/CAGL0I04840g/CAGL0D01694g/CAGL0M13387g/CAGL0H09922g
3	GO:0071940	fungal-type cell wall assembly	0.0001	47	16	CAGL0B00616g/CAGL0D06490g/CAGL0F01859g/CAGL0L10802g/CAGL0J03740g/CAGL0F02651g/CAGL0F00869g/CAGL0G05984g/CAGL0G08624g/CAGL0H01661g/CAGL0M13365g/CAGL0C05577g/CAGL0I04840g/CAGL0D01694g/CAGL0M13387g/CAGL0H09922g
4	GO:0070726	cell wall assembly	0.0002	48	16	CAGL0B00616g/CAGL0D06490g/CAGL0F01859g/CAGL0L10802g/CAGL0J03740g/CAGL0F02651g/CAGL0F00869g/CAGL0G05984g/CAGL0G08624g/CAGL0H01661g/CAGL0M13365g/CAGL0C05577g/CAGL0I04840g/CAGL0D01694g/CAGL0M13387g/CAGL0H09922g
5	GO:0055114	oxidation-reduction process	0.0003	186	41	CAGL0D04004g/CAGL0J08481g/CAGL0M14025g/CAGL0F07029g/CAGL0C04191g/CAGL0L01177g/CAGL0K01683g/CAGL0K05863g/CAGL0I02530g/CAGL0G00946g/CAGL0H09504g/CAGL0A03740g/CAGL0A02816g/CAGL0E01705g/CAGL0H06919g/CAGL0H09944g/CAGL0D05280g/CAGL0G02585g/CAGL0J01441g/CAGL0C04543g/CAGL0H06853g/CAGL0K06677g/CAGL0K04477g/CAGL0K12958g/CAGL0J07084g/CAGL0L05258g/CAGL0E04334g/CAGL0K12100g/CAGL0M14047g/CAGL0G05698g/CAGL0L095…
6	GO:0000422	autophagy of mitochondrion	0.0006	29	11	CAGL0K11682g/CAGL0H10428g/CAGL0J07304g/CAGL0L06006g/CAGL0J04686g/CAGL0C04631g/CAGL0E00649g/CAGL0A04675g/CAGL0H06545g/CAGL0H08261g/CAGL0H00704g
7	GO:0006508	proteolysis	0.0008	308	59	CAGL0L11726g/CAGL0M09669g/CAGL0M11418g/CAGL0A02728g/CAGL0G05676g/CAGL0K07766g/CAGL0J09350g/CAGL0C01903g/CAGL0C04609g/CAGL0J07282g/CAGL0M01320g/CAGL0E01859g/CAGL0G07623g/CAGL0H04103g/CAGL0J08096g/CAGL0J05874g/CAGL0C00319g/CAGL0F07799g/CAGL0G03223g/CAGL0A04477g/CAGL0K10494g/CAGL0I05478g/CAGL0H07315g/CAGL0G05423g/CAGL0L10802g/CAGL0M07568g/CAGL0H10186g/CAGL0J07304g/CAGL0B03311g/CAGL0F03157g/CAGL0M061…
8	GO:0030435	sporulation resulting in formation of a cellular spore	0.0011	150	33	CAGL0M09669g/CAGL0L07480g/CAGL0K02585g/CAGL0K02101g/CAGL0B02739g/CAGL0B00616g/CAGL0D06490g/CAGL0E03630g/CAGL0M01452g/CAGL0F01859g/CAGL0L03135g/CAGL0L10802g/CAGL0L06006g/CAGL0M07634g/CAGL0J07436g/CAGL0B03619g/CAGL0J03740g/CAGL0I07711g/CAGL0F02651g/CAGL0F00869g/CAGL0G05984g/CAGL0K03333g/CAGL0L11286g/CAGL0E03762g/CAGL0G08624g/CAGL0H01661g/CAGL0M13365g/CAGL0C05577g/CAGL0I04840g/CAGL0D01694g/CAGL0M133…
9	GO:0016125	sterol metabolic process	0.0013	41	13	CAGL0L10714g/CAGL0G05676g/CAGL0I02970g/CAGL0J07436g/CAGL0C02981g/CAGL0D05566g/CAGL0K04477g/CAGL0F07865g/CAGL0A00429g/CAGL0E04334g/CAGL0F01793g/CAGL0D05940g/CAGL0D05918g
10	GO:0006066	alcohol metabolic process	0.0021	91	22	CAGL0L10714g/CAGL0G05676g/CAGL0I08305g/CAGL0E05654g/CAGL0I02970g/CAGL0G09064g/CAGL0C05027g/CAGL0A01177g/CAGL0J01441g/CAGL0G02937g/CAGL0K04477g/CAGL0F07865g/CAGL0A00429g/CAGL0E04334g/CAGL0M14047g/CAGL0I06050g/CAGL0F01793g/CAGL0K03355g/CAGL0D05940g/CAGL0B02079g/CAGL0D05918g/CAGL0A01089g
11	GO:0055085	transmembrane transport	0.0023	302	56	CAGL0L12276g/CAGL0L03267g/CAGL0K01683g/CAGL0L02519g/CAGL0G03179g/CAGL0C01771g/CAGL0D00352g/CAGL0F08085g/CAGL0G07601g/CAGL0F07293g/CAGL0I09702g/CAGL0A04829g/CAGL0K11616g/CAGL0E01705g/CAGL0I09108g/CAGL0L06402g/CAGL0F01419g/CAGL0E04004g/CAGL0J01870g/CAGL0B02343g/CAGL0F00187g/CAGL0J08613g/CAGL0I03872g/CAGL0L03696g/CAGL0M04103g/CAGL0I04862g/CAGL0D00154g/CAGL0L02079g/CAGL0D04708g/CAGL0G08624g/CAGL0I097…
12	GO:0006855	drug transmembrane transport	0.0028	9	5	CAGL0B02343g/CAGL0G08624g/CAGL0J09944g/CAGL0H06039g/CAGL0M01760g
13	GO:0005975	carbohydrate metabolic process	0.003	215	42	CAGL0H06633g/CAGL0L10582g/CAGL0F04917g/CAGL0H10120g/CAGL0E05654g/CAGL0L02167g/CAGL0F03003g/CAGL0D06490g/CAGL0K01683g/CAGL0J02904g/CAGL0E05918g/CAGL0H10186g/CAGL0J08910g/CAGL0A04829g/CAGL0A02816g/CAGL0L00803g/CAGL0E01705g/CAGL0I04048g/CAGL0G09064g/CAGL0I10054g/CAGL0G09977g/CAGL0F03047g/CAGL0K01705g/CAGL0H07997g/CAGL0C04543g/CAGL0E01529g/CAGL0H02387g/CAGL0L09493g/CAGL0F08261g/CAGL0K12254g/CAGL0F006…
14	GO:0051321	meiotic cell cycle	0.0034	294	54	CAGL0J08481g/CAGL0K12540g/CAGL0K02585g/CAGL0K02101g/CAGL0H07139g/CAGL0B02739g/CAGL0J03806g/CAGL0B00616g/CAGL0D06490g/CAGL0E03630g/CAGL0I04224g/CAGL0F01859g/CAGL0I05544g/CAGL0L03135g/CAGL0L10802g/CAGL0L06006g/CAGL0J07436g/CAGL0L13090g/CAGL0J03740g/CAGL0I07711g/CAGL0I03586g/CAGL0A01606g/CAGL0C02783g/CAGL0F02651g/CAGL0F00869g/CAGL0B00462g/CAGL0G05984g/CAGL0F02167g/CAGL0K03333g/CAGL0J03960g/CAGL0L112…
15	GO:0030437	ascospore formation	0.0045	114	25	CAGL0K02585g/CAGL0K02101g/CAGL0B02739g/CAGL0B00616g/CAGL0D06490g/CAGL0F01859g/CAGL0L03135g/CAGL0L10802g/CAGL0L06006g/CAGL0J03740g/CAGL0I07711g/CAGL0F02651g/CAGL0F00869g/CAGL0G05984g/CAGL0L11286g/CAGL0E03762g/CAGL0G08624g/CAGL0H01661g/CAGL0M13365g/CAGL0C05577g/CAGL0I04840g/CAGL0D01694g/CAGL0M13387g/CAGL0H03575g/CAGL0H09922g
16	GO:0043935	sexual sporulation resulting in formation of a cellular spore	0.0045	126	27	CAGL0K02585g/CAGL0K02101g/CAGL0B02739g/CAGL0B00616g/CAGL0D06490g/CAGL0F01859g/CAGL0L03135g/CAGL0L10802g/CAGL0L06006g/CAGL0J07436g/CAGL0J03740g/CAGL0I07711g/CAGL0F02651g/CAGL0F00869g/CAGL0G05984g/CAGL0K03333g/CAGL0L11286g/CAGL0E03762g/CAGL0G08624g/CAGL0H01661g/CAGL0M13365g/CAGL0C05577g/CAGL0I04840g/CAGL0D01694g/CAGL0M13387g/CAGL0H03575g/CAGL0H09922g
17	GO:0000103	sulfate assimilation	0.005	10	5	CAGL0L02321g/CAGL0B03839g/CAGL0K00803g/CAGL0D05280g/CAGL0K06677g
18	GO:0000749	response to pheromone triggering conjugation with cellular fusion	0.0063	59	15	CAGL0K10384g/CAGL0K07458g/CAGL0G05676g/CAGL0G01320g/CAGL0I05852g/CAGL0B02739g/CAGL0K10714g/CAGL0D01276g/CAGL0C03509g/CAGL0A01584g/CAGL0F05841g/CAGL0H03135g/CAGL0M08184g/CAGL0K04169g/CAGL0G08646g
19	GO:0016126	sterol biosynthetic process	0.0066	33	10	CAGL0L10714g/CAGL0G05676g/CAGL0I02970g/CAGL0J07436g/CAGL0K04477g/CAGL0F07865g/CAGL0A00429g/CAGL0E04334g/CAGL0F01793g/CAGL0D05940g
20	GO:0008645	hexose transmembrane transport	0.0082	11	5	CAGL0A04829g/CAGL0M04103g/CAGL0J09020g/CAGL0B00726g/CAGL0A01826g
21	GO:0006696	ergosterol biosynthetic process	0.0083	29	9	CAGL0L10714g/CAGL0G05676g/CAGL0I02970g/CAGL0K04477g/CAGL0F07865g/CAGL0A00429g/CAGL0E04334g/CAGL0F01793g/CAGL0D05940g
22	GO:0044419	interspecies interaction between organisms	0.0092	67	16	CAGL0M09669g/CAGL0G05313g/CAGL0H07667g/CAGL0L07480g/CAGL0I05852g/CAGL0M01452g/CAGL0H08107g/CAGL0A04829g/CAGL0M07634g/CAGL0F08261g/CAGL0L07898g/CAGL0I10098g/CAGL0E03762g/CAGL0M01716g/CAGL0E06644g/CAGL0G03289g
23	GO:0019236	response to pheromone	0.0102	62	15	CAGL0K10384g/CAGL0K07458g/CAGL0G05676g/CAGL0G01320g/CAGL0I05852g/CAGL0B02739g/CAGL0K10714g/CAGL0D01276g/CAGL0C03509g/CAGL0A01584g/CAGL0F05841g/CAGL0H03135g/CAGL0M08184g/CAGL0K04169g/CAGL0G08646g
24	GO:0000096	sulfur amino acid metabolic process	0.0104	35	10	CAGL0M00550g/CAGL0F07029g/CAGL0L02321g/CAGL0M03971g/CAGL0B03839g/CAGL0K00803g/CAGL0D06402g/CAGL0L06094g/CAGL0K08668g/CAGL0B02651g
25	GO:0006694	steroid biosynthetic process	0.0104	35	10	CAGL0L10714g/CAGL0G05676g/CAGL0I02970g/CAGL0J07436g/CAGL0K04477g/CAGL0F07865g/CAGL0A00429g/CAGL0E04334g/CAGL0F01793g/CAGL0D05940g
26	GO:0008204	ergosterol metabolic process	0.0106	30	9	CAGL0L10714g/CAGL0G05676g/CAGL0I02970g/CAGL0K04477g/CAGL0F07865g/CAGL0A00429g/CAGL0E04334g/CAGL0F01793g/CAGL0D05940g
27	GO:0051603	proteolysis involved in cellular protein catabolic process	0.0121	206	38	CAGL0L11726g/CAGL0M11418g/CAGL0A02728g/CAGL0K07766g/CAGL0J09350g/CAGL0C01903g/CAGL0C04609g/CAGL0J07282g/CAGL0M01320g/CAGL0H04103g/CAGL0J08096g/CAGL0J05874g/CAGL0C00319g/CAGL0F07799g/CAGL0A04477g/CAGL0K10494g/CAGL0I05478g/CAGL0H07315g/CAGL0M07568g/CAGL0H10186g/CAGL0B03311g/CAGL0F03157g/CAGL0M06105g/CAGL0I06787g/CAGL0M02211g/CAGL0I03850g/CAGL0M07403g/CAGL0F02101g/CAGL0D03344g/CAGL0K12254g/CAGL0D060…
28	GO:0009062	fatty acid catabolic process	0.0128	21	7	CAGL0L02167g/CAGL0L09108g/CAGL0A03740g/CAGL0F05071g/CAGL0L09273g/CAGL0L09086g/CAGL0M09020g
29	GO:0046777	protein autophosphorylation	0.0128	21	7	CAGL0K07458g/CAGL0B01925g/CAGL0C03509g/CAGL0L06006g/CAGL0J03740g/CAGL0D06600g/CAGL0D01694g
30	GO:0044805	late nucleophagy	0.0156	17	6	CAGL0K11682g/CAGL0M00968g/CAGL0J07304g/CAGL0L06006g/CAGL0J04686g/CAGL0A04675g
31	GO:0006869	lipid transport	0.0168	54	13	CAGL0K07458g/CAGL0E04158g/CAGL0H05005g/CAGL0D00352g/CAGL0C03509g/CAGL0G07667g/CAGL0F05137g/CAGL0J07436g/CAGL0F01419g/CAGL0L10142g/CAGL0J03916g/CAGL0C03289g/CAGL0C03872g
32	GO:0030163	protein catabolic process	0.0173	224	40	CAGL0L11726g/CAGL0M11418g/CAGL0A02728g/CAGL0K07766g/CAGL0J09350g/CAGL0C01903g/CAGL0C04609g/CAGL0J07282g/CAGL0M01320g/CAGL0G07623g/CAGL0H04103g/CAGL0J08096g/CAGL0J05874g/CAGL0C00319g/CAGL0F07799g/CAGL0A04477g/CAGL0K10494g/CAGL0I05478g/CAGL0H07315g/CAGL0M07568g/CAGL0H10186g/CAGL0B03311g/CAGL0F03157g/CAGL0M06105g/CAGL0I06787g/CAGL0B03619g/CAGL0M02211g/CAGL0I03850g/CAGL0M07403g/CAGL0F02101g/CAGL0D033…
33	GO:0006013	mannose metabolic process	0.0173	5	3	CAGL0A04829g/CAGL0E05148g/CAGL0B00726g
34	GO:0007039	protein catabolic process in the vacuole	0.0173	5	3	CAGL0G07623g/CAGL0B03619g/CAGL0K12254g
35	GO:0009166	nucleotide catabolic process	0.0173	5	3	CAGL0H07667g/CAGL0C02321g/CAGL0L02607g
36	GO:0010674	negative regulation of transcription from RNA polymerase II promoter involved in meiotic cell cycle	0.0173	5	3	CAGL0K12540g/CAGL0J03806g/CAGL0J03960g
37	GO:0072671	mitochondria-associated ubiquitin-dependent protein catabolic process	0.0173	5	3	CAGL0J09350g/CAGL0K10494g/CAGL0M06105g
38	GO:0097316	cellular response to N-acetyl-D-glucosamine	0.0173	5	3	CAGL0L07480g/CAGL0M07634g/CAGL0L13090g
39	GO:0009395	phospholipid catabolic process	0.02	9	4	CAGL0E05654g/CAGL0J03542g/CAGL0A01177g/CAGL0H03575g
40	GO:0044409	entry into host	0.02	9	4	CAGL0M09669g/CAGL0M07634g/CAGL0F08261g/CAGL0E03762g
41	GO:0071629	cytoplasm protein quality control by the ubiquitin-proteasome system	0.02	9	4	CAGL0J09350g/CAGL0H07315g/CAGL0M06105g/CAGL0D03344g
42	GO:1904659	glucose transmembrane transport	0.02	9	4	CAGL0A04829g/CAGL0J09020g/CAGL0B00726g/CAGL0A01826g
43	GO:0009272	fungal-type cell wall biogenesis	0.0201	97	20	CAGL0H10120g/CAGL0I01012g/CAGL0B00616g/CAGL0D06490g/CAGL0F01859g/CAGL0D01276g/CAGL0L10802g/CAGL0J03740g/CAGL0F02651g/CAGL0F00869g/CAGL0G05984g/CAGL0E03762g/CAGL0G08624g/CAGL0H01661g/CAGL0M13365g/CAGL0C05577g/CAGL0I04840g/CAGL0D01694g/CAGL0M13387g/CAGL0H09922g
44	GO:0016052	carbohydrate catabolic process	0.0225	56	13	CAGL0A04829g/CAGL0A02816g/CAGL0G09977g/CAGL0K01705g/CAGL0C04543g/CAGL0E01529g/CAGL0F08261g/CAGL0E05610g/CAGL0K03421g/CAGL0C04323g/CAGL0E05148g/CAGL0K10428g/CAGL0B00726g
45	GO:0006783	heme biosynthetic process	0.0255	14	5	CAGL0D06138g/CAGL0L04664g/CAGL0H09504g/CAGL0K06677g/CAGL0K12100g
46	GO:0034613	cellular protein localization	0.0255	14	5	CAGL0K07766g/CAGL0M07205g/CAGL0D06006g/CAGL0L05258g/CAGL0H04851g
47	GO:0044114	development of symbiont in host	0.0255	14	5	CAGL0G05313g/CAGL0L07480g/CAGL0I05852g/CAGL0A04829g/CAGL0M07634g
48	GO:0000754	adaptation of signaling pathway by response to pheromone involved in conjugation with cellular fusion	0.0273	19	6	CAGL0G05676g/CAGL0G01320g/CAGL0I05852g/CAGL0K10714g/CAGL0F05841g/CAGL0G08646g
49	GO:0015918	sterol transport	0.0273	19	6	CAGL0E04158g/CAGL0G07667g/CAGL0F05137g/CAGL0F01419g/CAGL0J03916g/CAGL0C03872g
50	GO:0046148	pigment biosynthetic process	0.0273	19	6	CAGL0D06138g/CAGL0L04664g/CAGL0H09504g/CAGL0K06677g/CAGL0K12100g/CAGL0K03509g
51	GO:0006112	energy reserve metabolic process	0.029	35	9	CAGL0F04917g/CAGL0J02904g/CAGL0E05918g/CAGL0L00803g/CAGL0G09977g/CAGL0K03421g/CAGL0K10428g/CAGL0J03080g/CAGL0M12551g
52	GO:0031505	fungal-type cell wall organization	0.0299	192	34	CAGL0I05170g/CAGL0G00858g/CAGL0D00330g/CAGL0K07458g/CAGL0G01320g/CAGL0K12540g/CAGL0H10120g/CAGL0B00616g/CAGL0M01628g/CAGL0F03003g/CAGL0D06490g/CAGL0H05621g/CAGL0F01859g/CAGL0L10802g/CAGL0M07568g/CAGL0K05247g/CAGL0E01419g/CAGL0I10054g/CAGL0J03740g/CAGL0M13541g/CAGL0A04081g/CAGL0H07997g/CAGL0J11242g/CAGL0F02651g/CAGL0F00869g/CAGL0G05984g/CAGL0G08624g/CAGL0H01661g/CAGL0M13365g/CAGL0C05577g/CAGL0I048…
53	GO:0046459	short-chain fatty acid metabolic process	0.0313	6	3	CAGL0L09108g/CAGL0L09273g/CAGL0L09086g
54	GO:0071243	cellular response to arsenic-containing substance	0.0313	6	3	CAGL0L10186g/CAGL0J05962g/CAGL0K01727g
55	GO:0016579	protein deubiquitination	0.0336	25	7	CAGL0A02728g/CAGL0A04477g/CAGL0K10494g/CAGL0H10186g/CAGL0K12782g/CAGL0G05247g/CAGL0G02563g
56	GO:0006779	porphyrin-containing compound biosynthetic process	0.0343	15	5	CAGL0D06138g/CAGL0L04664g/CAGL0H09504g/CAGL0K06677g/CAGL0K12100g
57	GO:0033014	tetrapyrrole biosynthetic process	0.0343	15	5	CAGL0D06138g/CAGL0L04664g/CAGL0H09504g/CAGL0K06677g/CAGL0K12100g
58	GO:0034599	cellular response to oxidative stress	0.0352	109	21	CAGL0B02739g/CAGL0C04191g/CAGL0H04631g/CAGL0G03179g/CAGL0M11704g/CAGL0A02816g/CAGL0K00803g/CAGL0C04631g/CAGL0L13090g/CAGL0E00649g/CAGL0H09944g/CAGL0M13541g/CAGL0H03971g/CAGL0C04543g/CAGL0G01540g/CAGL0E00583g/CAGL0L05258g/CAGL0G09042g/CAGL0H08844g/CAGL0L11990g/CAGL0G02739g
59	GO:0036171	filamentous growth of a population of unicellular organisms in response to chemical stimulus	0.0378	31	8	CAGL0G05313g/CAGL0L07480g/CAGL0H08107g/CAGL0L03135g/CAGL0M07634g/CAGL0L13090g/CAGL0E03762g/CAGL0D05940g
60	GO:0071555	cell wall organization	0.0391	196	34	CAGL0I05170g/CAGL0G00858g/CAGL0D00330g/CAGL0K07458g/CAGL0G01320g/CAGL0K12540g/CAGL0H10120g/CAGL0B00616g/CAGL0M01628g/CAGL0F03003g/CAGL0D06490g/CAGL0H05621g/CAGL0F01859g/CAGL0L10802g/CAGL0M07568g/CAGL0K05247g/CAGL0E01419g/CAGL0I10054g/CAGL0J03740g/CAGL0M13541g/CAGL0A04081g/CAGL0H07997g/CAGL0J11242g/CAGL0F02651g/CAGL0F00869g/CAGL0G05984g/CAGL0G08624g/CAGL0H01661g/CAGL0M13365g/CAGL0C05577g/CAGL0I048…
61	GO:0006629	lipid metabolic process	0.0395	299	49	CAGL0K05995g/CAGL0G05313g/CAGL0K10384g/CAGL0J10868g/CAGL0L10714g/CAGL0K07458g/CAGL0M06347g/CAGL0G05676g/CAGL0L07480g/CAGL0G01562g/CAGL0E05654g/CAGL0H05005g/CAGL0L02167g/CAGL0L09108g/CAGL0M13981g/CAGL0I02970g/CAGL0L03135g/CAGL0A03740g/CAGL0I00330g/CAGL0J07436g/CAGL0L04686g/CAGL0H08888g/CAGL0I10054g/CAGL0J03542g/CAGL0A01177g/CAGL0L09493g/CAGL0C02981g/CAGL0F05071g/CAGL0K08272g/CAGL0L09273g/CAGL0M114…
62	GO:0071852	fungal-type cell wall organization or biogenesis	0.0396	237	40	CAGL0I05170g/CAGL0G00858g/CAGL0D00330g/CAGL0K07458g/CAGL0G01320g/CAGL0K12540g/CAGL0H10120g/CAGL0I01012g/CAGL0B00616g/CAGL0M01628g/CAGL0F03003g/CAGL0D06490g/CAGL0H05621g/CAGL0F01859g/CAGL0D01276g/CAGL0L10802g/CAGL0M07568g/CAGL0K05247g/CAGL0M07634g/CAGL0E01419g/CAGL0I10054g/CAGL0J03740g/CAGL0M13541g/CAGL0A04081g/CAGL0H07997g/CAGL0F08261g/CAGL0J11242g/CAGL0F02651g/CAGL0F00869g/CAGL0G05984g/CAGL0E037…
63	GO:0042546	cell wall biogenesis	0.0404	117	22	CAGL0H10120g/CAGL0I01012g/CAGL0B00616g/CAGL0D06490g/CAGL0F01859g/CAGL0D01276g/CAGL0L10802g/CAGL0J03740g/CAGL0H07997g/CAGL0F02651g/CAGL0F00869g/CAGL0G05984g/CAGL0E03762g/CAGL0G08624g/CAGL0H01661g/CAGL0M13365g/CAGL0C05577g/CAGL0I04840g/CAGL0I07249g/CAGL0D01694g/CAGL0M13387g/CAGL0H09922g
64	GO:0006734	NADH metabolic process	0.0424	11	4	CAGL0K01683g/CAGL0J01441g/CAGL0M05687g/CAGL0E05610g
65	GO:0036187	cell growth mode switching, budding to filamentous	0.0424	11	4	CAGL0G05313g/CAGL0M07634g/CAGL0E04334g/CAGL0D05940g
66	GO:0001678	cellular glucose homeostasis	0.0437	21	6	CAGL0H07667g/CAGL0J07282g/CAGL0A04829g/CAGL0I03872g/CAGL0F00605g/CAGL0J09020g
67	GO:2000222	positive regulation of pseudohyphal growth	0.0437	21	6	CAGL0L01771g/CAGL0H08107g/CAGL0K09350g/CAGL0M07634g/CAGL0F03047g/CAGL0M01716g
68	GO:0032120	ascospore-type prospore membrane assembly	0.0448	16	5	CAGL0I07711g/CAGL0L11286g/CAGL0M13365g/CAGL0C05577g/CAGL0H03575g
69	GO:0044262	cellular carbohydrate metabolic process	0.0456	125	23	CAGL0F04917g/CAGL0H10120g/CAGL0E05654g/CAGL0L02167g/CAGL0F03003g/CAGL0J02904g/CAGL0E05918g/CAGL0H10186g/CAGL0A04829g/CAGL0L00803g/CAGL0G09064g/CAGL0I10054g/CAGL0G09977g/CAGL0H07997g/CAGL0H02387g/CAGL0K12254g/CAGL0K03421g/CAGL0C04323g/CAGL0B03663g/CAGL0L09086g/CAGL0I06050g/CAGL0I07249g/CAGL0K10428g
70	GO:0007131	reciprocal meiotic recombination	0.0475	68	14	CAGL0H07139g/CAGL0E03630g/CAGL0I04224g/CAGL0I05544g/CAGL0I03586g/CAGL0A01606g/CAGL0C02783g/CAGL0F02167g/CAGL0I07425g/CAGL0H07601g/CAGL0M06435g/CAGL0H07645g/CAGL0K03905g/CAGL0L06050g
71	GO:0044403	symbiont process	0.0489	56	12	CAGL0M09669g/CAGL0H07667g/CAGL0M01452g/CAGL0H08107g/CAGL0A04829g/CAGL0M07634g/CAGL0F08261g/CAGL0I10098g/CAGL0E03762g/CAGL0M01716g/CAGL0E06644g/CAGL0G03289g
72	GO:0044406	adhesion of symbiont to host	0.0495	27	7	CAGL0H07667g/CAGL0M01452g/CAGL0A04829g/CAGL0M07634g/CAGL0I10098g/CAGL0M01716g/CAGL0E06644g
73	GO:0046939	nucleotide phosphorylation	0.0495	27	7	CAGL0A04829g/CAGL0K01705g/CAGL0L11902g/CAGL0E01529g/CAGL0F08261g/CAGL0E05610g/CAGL0B00726g
74	GO:0000338	protein deneddylation	0.0496	7	3	CAGL0G05676g/CAGL0C04609g/CAGL0F05841g
75	GO:0006113	fermentation	0.0496	7	3	CAGL0L00649g/CAGL0J09020g/CAGL0D05918g
76	GO:0051038	negative regulation of transcription involved in meiotic cell cycle	0.0496	7	3	CAGL0K12540g/CAGL0J03806g/CAGL0J03960g
77	GO:0071406	cellular response to methylmercury	0.0496	7	3	CAGL0M11418g/CAGL0G01474g/CAGL0H04103g
78	GO:1900430	positive regulation of filamentous growth of a population of unicellular organisms	0.0529	69	14	CAGL0H07667g/CAGL0I05852g/CAGL0L01771g/CAGL0H08107g/CAGL0D01276g/CAGL0K09350g/CAGL0M07634g/CAGL0A01628g/CAGL0L13090g/CAGL0F03047g/CAGL0K09372g/CAGL0E03762g/CAGL0G09042g/CAGL0M01716g
79	GO:0006006	glucose metabolic process	0.0529	33	8	CAGL0H06633g/CAGL0H10186g/CAGL0A04829g/CAGL0E01705g/CAGL0K12254g/CAGL0E05610g/CAGL0B00726g/CAGL0J00451g
80	GO:0007033	vacuole organization	0.0532	88	17	CAGL0K10384g/CAGL0G00968g/CAGL0I01012g/CAGL0M00968g/CAGL0M01452g/CAGL0G04697g/CAGL0J07304g/CAGL0L06006g/CAGL0J04686g/CAGL0K00803g/CAGL0L06402g/CAGL0B03619g/CAGL0E00649g/CAGL0A04675g/CAGL0F08261g/CAGL0G06006g/CAGL0H00704g
81	GO:1900428	regulation of filamentous growth of a population of unicellular organisms	0.0532	127	23	CAGL0G05313g/CAGL0H07667g/CAGL0L07480g/CAGL0G01320g/CAGL0I05852g/CAGL0L01771g/CAGL0H08107g/CAGL0I05544g/CAGL0D01276g/CAGL0K09350g/CAGL0M07634g/CAGL0K00803g/CAGL0A01628g/CAGL0L13090g/CAGL0F03047g/CAGL0K09372g/CAGL0E03762g/CAGL0E04334g/CAGL0G09042g/CAGL0M01716g/CAGL0F08195g/CAGL0D05940g/CAGL0H10164g
82	GO:0006096	glycolytic process	0.0537	22	6	CAGL0A04829g/CAGL0K01705g/CAGL0E01529g/CAGL0F08261g/CAGL0E05610g/CAGL0B00726g
83	GO:0044550	secondary metabolite biosynthetic process	0.0537	22	6	CAGL0K02585g/CAGL0B02739g/CAGL0M13651g/CAGL0J05852g/CAGL0B02079g/CAGL0G00242g
84	GO:0006511	ubiquitin-dependent protein catabolic process	0.0554	188	32	CAGL0L11726g/CAGL0M11418g/CAGL0A02728g/CAGL0K07766g/CAGL0J09350g/CAGL0C01903g/CAGL0C04609g/CAGL0J07282g/CAGL0M01320g/CAGL0H04103g/CAGL0J08096g/CAGL0J05874g/CAGL0F07799g/CAGL0A04477g/CAGL0K10494g/CAGL0I05478g/CAGL0H07315g/CAGL0M07568g/CAGL0H10186g/CAGL0B03311g/CAGL0M06105g/CAGL0I06787g/CAGL0I03850g/CAGL0D03344g/CAGL0K12254g/CAGL0D06006g/CAGL0J07414g/CAGL0L02101g/CAGL0K03333g/CAGL0G05247g/CAGL0J059…
85	GO:0001402	signal transduction involved in filamentous growth	0.057	17	5	CAGL0G01320g/CAGL0B02739g/CAGL0E01419g/CAGL0A01177g/CAGL0K04169g
86	GO:0001410	chlamydospore formation	0.057	17	5	CAGL0M09669g/CAGL0L07480g/CAGL0M01452g/CAGL0M07634g/CAGL0E03762g
87	GO:1900437	regulation of filamentous growth of a population of unicellular organisms in response to chemical stimulus	0.057	17	5	CAGL0L07480g/CAGL0H08107g/CAGL0M07634g/CAGL0L13090g/CAGL0E03762g
88	GO:0000128	flocculation	0.0573	12	4	CAGL0L13299g/CAGL0E06600g/CAGL0J08613g/CAGL0F08195g
89	GO:0007155	cell adhesion	0.0602	64	13	CAGL0L07480g/CAGL0K02585g/CAGL0E05654g/CAGL0L13299g/CAGL0K01683g/CAGL0A01584g/CAGL0M07634g/CAGL0K04631g/CAGL0E06600g/CAGL0J08613g/CAGL0G09042g/CAGL0M01716g/CAGL0F08195g
90	GO:1900443	regulation of filamentous growth of a population of unicellular organisms in response to biotic stimulus	0.0617	34	8	CAGL0L07480g/CAGL0G01320g/CAGL0I05852g/CAGL0H08107g/CAGL0M07634g/CAGL0L13090g/CAGL0G09042g/CAGL0M01716g
91	GO:0051701	interaction with host	0.0703	53	11	CAGL0M09669g/CAGL0H07667g/CAGL0M01452g/CAGL0A04829g/CAGL0M07634g/CAGL0F08261g/CAGL0I10098g/CAGL0E03762g/CAGL0M01716g/CAGL0E06644g/CAGL0G03289g
92	GO:0006665	sphingolipid metabolic process	0.0714	47	10	CAGL0K05995g/CAGL0G05313g/CAGL0K07458g/CAGL0M06347g/CAGL0H08888g/CAGL0I10054g/CAGL0K08272g/CAGL0K03509g/CAGL0A00341g/CAGL0L10142g
93	GO:0034727	piecemeal microautophagy of the nucleus	0.0714	35	8	CAGL0K11682g/CAGL0J09350g/CAGL0J07304g/CAGL0L06006g/CAGL0J04686g/CAGL0J03542g/CAGL0A04675g/CAGL0J03916g
94	GO:0016237	lysosomal microautophagy	0.0719	41	9	CAGL0K11682g/CAGL0J09350g/CAGL0J07304g/CAGL0L06006g/CAGL0J04686g/CAGL0M02211g/CAGL0J03542g/CAGL0A04675g/CAGL0J03916g
95	GO:0007032	endosome organization	0.0747	13	4	CAGL0L01683g/CAGL0M09867g/CAGL0J03542g/CAGL0G05247g
96	GO:0015718	monocarboxylic acid transport	0.0747	13	4	CAGL0F08085g/CAGL0J09944g/CAGL0M03465g/CAGL0C03289g
97	GO:1900439	positive regulation of filamentous growth of a population of unicellular organisms in response to chemical stimulus	0.0747	13	4	CAGL0H08107g/CAGL0M07634g/CAGL0L13090g/CAGL0E03762g
98	GO:0048869	cellular developmental process	0.0754	221	36	CAGL0M09669g/CAGL0L07480g/CAGL0K02585g/CAGL0K02101g/CAGL0B02739g/CAGL0B00616g/CAGL0G09493g/CAGL0D06490g/CAGL0E03630g/CAGL0M01452g/CAGL0F01859g/CAGL0I05544g/CAGL0L03135g/CAGL0L10802g/CAGL0L06006g/CAGL0M07634g/CAGL0J07436g/CAGL0B03619g/CAGL0E00649g/CAGL0J03740g/CAGL0I07711g/CAGL0F02651g/CAGL0F00869g/CAGL0G05984g/CAGL0K03333g/CAGL0L11286g/CAGL0E03762g/CAGL0G08624g/CAGL0H01661g/CAGL0M13365g/CAGL0C055…
99	GO:0000045	autophagosome assembly	0.0778	24	6	CAGL0M00968g/CAGL0J07304g/CAGL0L06006g/CAGL0J04686g/CAGL0A04675g/CAGL0H00704g
100	GO:0006165	nucleoside diphosphate phosphorylation	0.0778	24	6	CAGL0A04829g/CAGL0K01705g/CAGL0E01529g/CAGL0F08261g/CAGL0E05610g/CAGL0B00726g

## Sheet: GO_down_genes_WT
Supplementary file 12 - List of enriched GO terms from down-regulated genes upon fluconazole treatment in wildtype C. glabrata cells
S.no.	ID	Description	P-value	Number of genes in the background	Number of upregulated genes	Down-regulated genes
1	GO:0006412	translation	0	360	145	CAGL0I03476g/CAGL0K06061g/CAGL0E04994g/CAGL0L08114g/CAGL0L04510g/CAGL0J06374g/CAGL0L08118g/CAGL0J09086g/CAGL0L03846g/CAGL0I01430g/CAGL0K06567g/CAGL0A03388g/CAGL0A03278g/CAGL0H02409g/CAGL0K06033g/CAGL0G07227g/CAGL0G02079g/CAGL0M06303g/CAGL0M02497g/CAGL0J03234g/CAGL0L10560g/CAGL0K08382g/CAGL0A02189g/CAGL0M06523g/CAGL0D05214g/CAGL0K03135g/CAGL0G00154g/CAGL0K12012g/CAGL0D00616g/CAGL0J07238g/CAGL0G035…
2	GO:0043603	cellular amide metabolic process	0	429	155	CAGL0I03476g/CAGL0H03993g/CAGL0K06061g/CAGL0E04994g/CAGL0L08114g/CAGL0L04510g/CAGL0J06374g/CAGL0L08118g/CAGL0J09086g/CAGL0L03846g/CAGL0I01430g/CAGL0K06567g/CAGL0A03388g/CAGL0A03278g/CAGL0H02409g/CAGL0K06033g/CAGL0G07227g/CAGL0G02079g/CAGL0M06303g/CAGL0M02497g/CAGL0J03234g/CAGL0L10560g/CAGL0K08382g/CAGL0A02189g/CAGL0M06523g/CAGL0D05214g/CAGL0K03135g/CAGL0G00154g/CAGL0K12012g/CAGL0D00616g/CAGL0J072…
3	GO:0002181	cytoplasmic translation	0	72	42	CAGL0E04994g/CAGL0A03388g/CAGL0H02409g/CAGL0K06033g/CAGL0M02497g/CAGL0L10560g/CAGL0D05214g/CAGL0D00616g/CAGL0M08118g/CAGL0G01078g/CAGL0J02354g/CAGL0L11462g/CAGL0K10906g/CAGL0J08679g/CAGL0A03168g/CAGL0B03795g/CAGL0J07898g/CAGL0H00957g/CAGL0G09669g/CAGL0F01683g/CAGL0L06952g/CAGL0C05379g/CAGL0G00990g/CAGL0B00792g/CAGL0K04741g/CAGL0L01353g/CAGL0J04576g/CAGL0L06754g/CAGL0M12122g/CAGL0D01188g/CAGL0K088…
4	GO:0042254	ribosome biogenesis	0	287	81	CAGL0K06061g/CAGL0I03234g/CAGL0L04510g/CAGL0L08118g/CAGL0J09086g/CAGL0L03846g/CAGL0G07227g/CAGL0M06303g/CAGL0J03234g/CAGL0L10560g/CAGL0K08382g/CAGL0K03135g/CAGL0G00154g/CAGL0I00792g/CAGL0H00462g/CAGL0M08118g/CAGL0E03938g/CAGL0M04873g/CAGL0G06490g/CAGL0F01045g/CAGL0J09614g/CAGL0G05027g/CAGL0E01991g/CAGL0G08173g/CAGL0B01203g/CAGL0L11462g/CAGL0G02475g/CAGL0J00737g/CAGL0A01540g/CAGL0F02937g/CAGL0K021…
5	GO:0009060	aerobic respiration	0	72	33	CAGL0C03223g/CAGL0I01408g/CAGL0J00429g/CAGL0G10153g/CAGL0C01325g/CAGL0D05192g/CAGL0L06160g/CAGL0I06270g/CAGL0H03993g/CAGL0F04213g/CAGL0C02623g/CAGL0I03190g/CAGL0G10131g/CAGL0H02491g/CAGL0D00748g/CAGL0D06424g/CAGL0L10406g/CAGL0I07227g/CAGL0L05236g/CAGL0H09328g/CAGL0F04565g/CAGL0D01958g/CAGL0G08712g/CAGL0H00506g/CAGL0J00847g/CAGL0L06204g/CAGL0E01287g/CAGL0K02893g/CAGL0G02673g/CAGL0F08107g/CAGL0C017…
6	GO:0046390	ribose phosphate biosynthetic process	0	57	29	CAGL0K02409g/CAGL0F02563g/CAGL0M09581g/CAGL0H00506g/CAGL0H05489g/CAGL0F03927g/CAGL0A03366g/CAGL0I07969g/CAGL0A03036g/CAGL0M13277g/CAGL0B02794g/CAGL0I04686g/CAGL0K05027g/CAGL0B02717g/CAGL0H01397g/CAGL0G07106g/CAGL0A01111g/CAGL0L09713g/CAGL0M00484g/CAGL0H04191g/CAGL0F04433g/CAGL0K06281g/CAGL0I05500g/CAGL0A00495g/CAGL0M13717g/CAGL0I00572g/CAGL0C05181g/CAGL0C04455g/CAGL0D00550g
7	GO:0045333	cellular respiration	0	83	35	CAGL0C03223g/CAGL0I01408g/CAGL0J00429g/CAGL0G10153g/CAGL0C01325g/CAGL0D05192g/CAGL0L06160g/CAGL0I06270g/CAGL0H03993g/CAGL0F04213g/CAGL0C02623g/CAGL0I03190g/CAGL0G10131g/CAGL0H02491g/CAGL0D00748g/CAGL0D06424g/CAGL0L10406g/CAGL0I07227g/CAGL0L05236g/CAGL0H09328g/CAGL0F04565g/CAGL0D01958g/CAGL0G08712g/CAGL0H00506g/CAGL0J00847g/CAGL0L06204g/CAGL0E01287g/CAGL0C04741g/CAGL0K02893g/CAGL0F05863g/CAGL0G026…
8	GO:0009165	nucleotide biosynthetic process	0	79	33	CAGL0K02409g/CAGL0F02563g/CAGL0M09581g/CAGL0H00506g/CAGL0H05489g/CAGL0F03927g/CAGL0A03366g/CAGL0I07969g/CAGL0A03036g/CAGL0K02541g/CAGL0M13277g/CAGL0B02794g/CAGL0I04686g/CAGL0K05027g/CAGL0K10780g/CAGL0B02717g/CAGL0H01397g/CAGL0G07106g/CAGL0A01111g/CAGL0L09713g/CAGL0M00484g/CAGL0A01023g/CAGL0H04191g/CAGL0F04433g/CAGL0K06281g/CAGL0I05500g/CAGL0A00495g/CAGL0M13717g/CAGL0I00572g/CAGL0C05181g/CAGL0L098…
9	GO:0006164	purine nucleotide biosynthetic process	0	50	26	CAGL0K02409g/CAGL0F02563g/CAGL0M09581g/CAGL0H00506g/CAGL0H05489g/CAGL0F03927g/CAGL0A03366g/CAGL0I07969g/CAGL0A03036g/CAGL0M13277g/CAGL0B02794g/CAGL0I04686g/CAGL0K05027g/CAGL0K10780g/CAGL0B02717g/CAGL0H01397g/CAGL0G07106g/CAGL0A01111g/CAGL0L09713g/CAGL0M00484g/CAGL0H04191g/CAGL0K06281g/CAGL0A00495g/CAGL0M13717g/CAGL0I00572g/CAGL0C04455g
10	GO:0019693	ribose phosphate metabolic process	0	96	36	CAGL0H07579g/CAGL0K02409g/CAGL0H03993g/CAGL0F02563g/CAGL0M09581g/CAGL0H00506g/CAGL0H05489g/CAGL0F03927g/CAGL0A03366g/CAGL0I07969g/CAGL0A03036g/CAGL0M13277g/CAGL0B02794g/CAGL0I04686g/CAGL0K05027g/CAGL0B02717g/CAGL0H01397g/CAGL0G07106g/CAGL0A01111g/CAGL0L09713g/CAGL0M00484g/CAGL0C03630g/CAGL0H04191g/CAGL0F04433g/CAGL0K06281g/CAGL0I05500g/CAGL0A00495g/CAGL0M13717g/CAGL0I00572g/CAGL0F08107g/CAGL0J042…
11	GO:0009152	purine ribonucleotide biosynthetic process	0	49	25	CAGL0K02409g/CAGL0F02563g/CAGL0M09581g/CAGL0H00506g/CAGL0H05489g/CAGL0F03927g/CAGL0A03366g/CAGL0I07969g/CAGL0A03036g/CAGL0M13277g/CAGL0B02794g/CAGL0I04686g/CAGL0K05027g/CAGL0B02717g/CAGL0H01397g/CAGL0G07106g/CAGL0A01111g/CAGL0L09713g/CAGL0M00484g/CAGL0H04191g/CAGL0K06281g/CAGL0A00495g/CAGL0M13717g/CAGL0I00572g/CAGL0C04455g
12	GO:0006163	purine nucleotide metabolic process	0	86	33	CAGL0H07579g/CAGL0K02409g/CAGL0H03993g/CAGL0F02563g/CAGL0M09581g/CAGL0H00506g/CAGL0H05489g/CAGL0F03927g/CAGL0A03366g/CAGL0I07969g/CAGL0A03036g/CAGL0M13277g/CAGL0B02794g/CAGL0I04686g/CAGL0K05027g/CAGL0K10780g/CAGL0B02717g/CAGL0H01397g/CAGL0G07106g/CAGL0A01111g/CAGL0L09713g/CAGL0M00484g/CAGL0C03630g/CAGL0H04191g/CAGL0K06281g/CAGL0A00495g/CAGL0M13717g/CAGL0I00572g/CAGL0F08107g/CAGL0J04268g/CAGL0C044…
13	GO:0042775	mitochondrial ATP synthesis coupled electron transport	0	21	16	CAGL0I01408g/CAGL0J00429g/CAGL0G10153g/CAGL0C01325g/CAGL0D05192g/CAGL0L06160g/CAGL0I06270g/CAGL0C02623g/CAGL0I03190g/CAGL0G10131g/CAGL0H02491g/CAGL0D00748g/CAGL0L10406g/CAGL0H09328g/CAGL0K02893g/CAGL0B02431g
14	GO:0022900	electron transport chain	0	24	17	CAGL0I01408g/CAGL0J00429g/CAGL0G10153g/CAGL0C01325g/CAGL0D05192g/CAGL0L06160g/CAGL0I06270g/CAGL0C02623g/CAGL0I03190g/CAGL0G10131g/CAGL0H02491g/CAGL0D00748g/CAGL0L10406g/CAGL0H09328g/CAGL0J00847g/CAGL0K02893g/CAGL0B02431g
15	GO:0009117	nucleotide metabolic process	0	138	42	CAGL0H07579g/CAGL0K02409g/CAGL0H03993g/CAGL0J06380g/CAGL0F02563g/CAGL0M09581g/CAGL0H00506g/CAGL0H05489g/CAGL0F03927g/CAGL0A03366g/CAGL0I07969g/CAGL0A03036g/CAGL0K02541g/CAGL0M13277g/CAGL0B02794g/CAGL0I04686g/CAGL0K05027g/CAGL0K10780g/CAGL0B02717g/CAGL0H01397g/CAGL0G07106g/CAGL0A01111g/CAGL0L09713g/CAGL0M00484g/CAGL0C03630g/CAGL0A01023g/CAGL0H04191g/CAGL0F04433g/CAGL0K06281g/CAGL0I05500g/CAGL0A004…
16	GO:0006364	rRNA processing	0	198	52	CAGL0K06061g/CAGL0I03234g/CAGL0L04510g/CAGL0L08118g/CAGL0J09086g/CAGL0L03846g/CAGL0G07227g/CAGL0M06303g/CAGL0J03234g/CAGL0L10560g/CAGL0K08382g/CAGL0K03135g/CAGL0G00154g/CAGL0I00792g/CAGL0M08118g/CAGL0E03938g/CAGL0J09614g/CAGL0G05027g/CAGL0G08173g/CAGL0B01203g/CAGL0J00737g/CAGL0A01540g/CAGL0M00814g/CAGL0K11748g/CAGL0L04840g/CAGL0C05379g/CAGL0M06501g/CAGL0J10802g/CAGL0I09790g/CAGL0K01859g/CAGL0H056…
17	GO:0022904	respiratory electron transport chain	0	22	16	CAGL0I01408g/CAGL0J00429g/CAGL0G10153g/CAGL0C01325g/CAGL0D05192g/CAGL0L06160g/CAGL0I06270g/CAGL0C02623g/CAGL0I03190g/CAGL0G10131g/CAGL0H02491g/CAGL0D00748g/CAGL0L10406g/CAGL0H09328g/CAGL0K02893g/CAGL0B02431g
18	GO:0006413	translational initiation	0	57	25	CAGL0H02409g/CAGL0L10978g/CAGL0B03795g/CAGL0H00957g/CAGL0G09669g/CAGL0L06952g/CAGL0E01463g/CAGL0D03718g/CAGL0I04356g/CAGL0E03289g/CAGL0M13893g/CAGL0G08041g/CAGL0L01353g/CAGL0K04345g/CAGL0K08888g/CAGL0C01221g/CAGL0M01804g/CAGL0M07722g/CAGL0M12144g/CAGL0B03927g/CAGL0I08393g/CAGL0J07678g/CAGL0K09966g/CAGL0D01826g/CAGL0I08327g
19	GO:0002183	cytoplasmic translational initiation	0	22	15	CAGL0H02409g/CAGL0B03795g/CAGL0H00957g/CAGL0G09669g/CAGL0L06952g/CAGL0K08888g/CAGL0C01221g/CAGL0M01804g/CAGL0M07722g/CAGL0M12144g/CAGL0I08393g/CAGL0J07678g/CAGL0K09966g/CAGL0D01826g/CAGL0I08327g
20	GO:0006754	ATP biosynthetic process	0	20	14	CAGL0K02409g/CAGL0M09581g/CAGL0H00506g/CAGL0H05489g/CAGL0I07969g/CAGL0A03036g/CAGL0I04686g/CAGL0H01397g/CAGL0A01111g/CAGL0L09713g/CAGL0H04191g/CAGL0A00495g/CAGL0I00572g/CAGL0C04455g
21	GO:0042255	ribosome assembly	0	42	20	CAGL0K06061g/CAGL0L04510g/CAGL0L08118g/CAGL0G08173g/CAGL0L11462g/CAGL0G02475g/CAGL0J00737g/CAGL0F02937g/CAGL0K02123g/CAGL0K11748g/CAGL0M02695g/CAGL0K06149g/CAGL0G01826g/CAGL0M10197g/CAGL0G00990g/CAGL0M11616g/CAGL0I07975g/CAGL0M12144g/CAGL0J03476g/CAGL0C03355g
22	GO:0016072	rRNA metabolic process	0	245	55	CAGL0K06061g/CAGL0I03234g/CAGL0L04510g/CAGL0L08118g/CAGL0J09086g/CAGL0L03846g/CAGL0G07227g/CAGL0M06303g/CAGL0J03234g/CAGL0L10560g/CAGL0K08382g/CAGL0K03135g/CAGL0G00154g/CAGL0I00792g/CAGL0M08118g/CAGL0E03938g/CAGL0J09614g/CAGL0G05027g/CAGL0G08173g/CAGL0B01203g/CAGL0J00737g/CAGL0A01540g/CAGL0M00814g/CAGL0J07766g/CAGL0K11748g/CAGL0L04840g/CAGL0C05379g/CAGL0M06501g/CAGL0J10802g/CAGL0I09790g/CAGL0K018…
23	GO:0006414	translational elongation	0	39	19	CAGL0I03476g/CAGL0J06374g/CAGL0I01430g/CAGL0L10560g/CAGL0G00154g/CAGL0I00814g/CAGL0A03168g/CAGL0F08547g/CAGL0C05379g/CAGL0L05148g/CAGL0G00990g/CAGL0A03234g/CAGL0K04741g/CAGL0L01353g/CAGL0J04576g/CAGL0D01188g/CAGL0K07832g/CAGL0B04961g/CAGL0D01826g
24	GO:0042273	ribosomal large subunit biogenesis	0	82	28	CAGL0J09086g/CAGL0M08118g/CAGL0E03938g/CAGL0B01203g/CAGL0L11462g/CAGL0G02475g/CAGL0F02937g/CAGL0M02695g/CAGL0G01826g/CAGL0L03806g/CAGL0M10197g/CAGL0E03289g/CAGL0G00990g/CAGL0C03531g/CAGL0G08041g/CAGL0M11616g/CAGL0G09130g/CAGL0F02299g/CAGL0H03773g/CAGL0L10890g/CAGL0I07975g/CAGL0L00341g/CAGL0J10032g/CAGL0J03476g/CAGL0G07843g/CAGL0I02926g/CAGL0F07139g/CAGL0L02871g
25	GO:0015986	ATP synthesis coupled proton transport	0	19	13	CAGL0K02409g/CAGL0M09581g/CAGL0H00506g/CAGL0H05489g/CAGL0I07969g/CAGL0A03036g/CAGL0I04686g/CAGL0H01397g/CAGL0A01111g/CAGL0L09713g/CAGL0H04191g/CAGL0I00572g/CAGL0C04455g
26	GO:0042274	ribosomal small subunit biogenesis	0	107	32	CAGL0K06061g/CAGL0I03234g/CAGL0L04510g/CAGL0L08118g/CAGL0G07227g/CAGL0M06303g/CAGL0J03234g/CAGL0K08382g/CAGL0K03135g/CAGL0I00792g/CAGL0G05027g/CAGL0E01991g/CAGL0G08173g/CAGL0J00737g/CAGL0M00814g/CAGL0K11748g/CAGL0L04840g/CAGL0K06149g/CAGL0M06501g/CAGL0M02849g/CAGL0I09790g/CAGL0H05643g/CAGL0A04521g/CAGL0C03531g/CAGL0F02299g/CAGL0M12144g/CAGL0B00352g/CAGL0G07843g/CAGL0C03355g/CAGL0M07227g/CAGL0H009…
27	GO:0006407	rRNA export from nucleus	0	12	10	CAGL0K06061g/CAGL0L04510g/CAGL0G07227g/CAGL0H00462g/CAGL0M04873g/CAGL0F01045g/CAGL0E01991g/CAGL0K02123g/CAGL0F07073g/CAGL0J11220g
28	GO:0030490	maturation of SSU-rRNA	0	90	28	CAGL0K06061g/CAGL0I03234g/CAGL0L04510g/CAGL0L08118g/CAGL0G07227g/CAGL0M06303g/CAGL0J03234g/CAGL0K08382g/CAGL0K03135g/CAGL0I00792g/CAGL0G05027g/CAGL0G08173g/CAGL0J00737g/CAGL0M00814g/CAGL0K11748g/CAGL0L04840g/CAGL0M06501g/CAGL0I09790g/CAGL0H05643g/CAGL0A04521g/CAGL0C03531g/CAGL0F02299g/CAGL0M12144g/CAGL0B00352g/CAGL0G07843g/CAGL0C03355g/CAGL0M07227g/CAGL0F07139g
29	GO:0006122	mitochondrial electron transport, ubiquinol to cytochrome c	0	10	9	CAGL0I01408g/CAGL0G10153g/CAGL0D05192g/CAGL0I06270g/CAGL0I03190g/CAGL0G10131g/CAGL0L10406g/CAGL0H09328g/CAGL0K02893g
30	GO:0006099	tricarboxylic acid cycle	0	19	12	CAGL0C03223g/CAGL0H03993g/CAGL0D06424g/CAGL0I07227g/CAGL0L05236g/CAGL0D01958g/CAGL0G08712g/CAGL0J00847g/CAGL0E01287g/CAGL0G02673g/CAGL0F08107g/CAGL0A01045g
31	GO:0019752	carboxylic acid metabolic process	0	320	61	CAGL0H07579g/CAGL0B00286g/CAGL0H03993g/CAGL0C05115g/CAGL0I07227g/CAGL0L05236g/CAGL0B01122g/CAGL0C01573g/CAGL0D00528g/CAGL0B01507g/CAGL0A02189g/CAGL0K12012g/CAGL0M00176g/CAGL0E03157g/CAGL0I09592g/CAGL0L05676g/CAGL0B02794g/CAGL0K05027g/CAGL0E01287g/CAGL0D00176g/CAGL0B02717g/CAGL0I00418g/CAGL0A02112g/CAGL0G02673g/CAGL0F01705g/CAGL0K06787g/CAGL0K09724g/CAGL0M12991g/CAGL0J10406g/CAGL0K07656g/CAGL0J006…
32	GO:0009141	nucleoside triphosphate metabolic process	0	50	19	CAGL0H07579g/CAGL0K02409g/CAGL0M09581g/CAGL0H00506g/CAGL0H05489g/CAGL0I07969g/CAGL0A03036g/CAGL0M13277g/CAGL0I04686g/CAGL0H01397g/CAGL0A01111g/CAGL0L09713g/CAGL0H04191g/CAGL0F04433g/CAGL0A00495g/CAGL0I00572g/CAGL0F00429g/CAGL0C04455g/CAGL0M13343g
33	GO:0000462	maturation of SSU-rRNA from tricistronic rRNA transcript (SSU-rRNA, 5.8S rRNA, LSU-rRNA)	0	78	24	CAGL0I03234g/CAGL0L08118g/CAGL0G07227g/CAGL0M06303g/CAGL0J03234g/CAGL0K08382g/CAGL0K03135g/CAGL0I00792g/CAGL0G05027g/CAGL0J00737g/CAGL0M00814g/CAGL0K11748g/CAGL0L04840g/CAGL0M06501g/CAGL0I09790g/CAGL0H05643g/CAGL0A04521g/CAGL0F02299g/CAGL0M12144g/CAGL0B00352g/CAGL0G07843g/CAGL0C03355g/CAGL0M07227g/CAGL0F07139g
34	GO:0097064	ncRNA export from nucleus	0	28	13	CAGL0K06061g/CAGL0L04510g/CAGL0G07227g/CAGL0H00462g/CAGL0M04873g/CAGL0F01045g/CAGL0E01991g/CAGL0K02123g/CAGL0F07073g/CAGL0G03003g/CAGL0J11220g/CAGL0D01188g/CAGL0K07832g
35	GO:0009116	nucleoside metabolic process	0	24	12	CAGL0F02563g/CAGL0K02541g/CAGL0G07106g/CAGL0M00484g/CAGL0D01562g/CAGL0I05500g/CAGL0C02189g/CAGL0M13717g/CAGL0C05181g/CAGL0D00550g/CAGL0D03190g/CAGL0C04983g
36	GO:0006418	tRNA aminoacylation for protein translation	0	37	15	CAGL0A02189g/CAGL0K12012g/CAGL0A02112g/CAGL0F01705g/CAGL0M12991g/CAGL0J10406g/CAGL0K07656g/CAGL0H09372g/CAGL0C01947g/CAGL0G03091g/CAGL0A02090g/CAGL0K11726g/CAGL0G03311g/CAGL0J07744g/CAGL0L04532g
37	GO:0006520	cellular amino acid metabolic process	0	184	39	CAGL0B00286g/CAGL0C05115g/CAGL0B01122g/CAGL0C01573g/CAGL0B01507g/CAGL0A02189g/CAGL0K12012g/CAGL0M00176g/CAGL0E03157g/CAGL0I09592g/CAGL0L05676g/CAGL0D00176g/CAGL0A02112g/CAGL0F01705g/CAGL0K09724g/CAGL0M12991g/CAGL0J10406g/CAGL0K07656g/CAGL0J00649g/CAGL0M07876g/CAGL0H09372g/CAGL0C02233g/CAGL0C01947g/CAGL0G03091g/CAGL0C02189g/CAGL0A02090g/CAGL0K11726g/CAGL0G01254g/CAGL0G03311g/CAGL0M12188g/CAGL0I107…
38	GO:0046034	ATP metabolic process	0	42	16	CAGL0H07579g/CAGL0K02409g/CAGL0M09581g/CAGL0H00506g/CAGL0H05489g/CAGL0I07969g/CAGL0A03036g/CAGL0I04686g/CAGL0H01397g/CAGL0A01111g/CAGL0L09713g/CAGL0H04191g/CAGL0A00495g/CAGL0I00572g/CAGL0C04455g/CAGL0M13343g
39	GO:0022618	ribonucleoprotein complex assembly	0	104	27	CAGL0K06061g/CAGL0L04510g/CAGL0L08118g/CAGL0L03846g/CAGL0H02409g/CAGL0G08173g/CAGL0L11462g/CAGL0G02475g/CAGL0B03795g/CAGL0J00737g/CAGL0F02937g/CAGL0K11748g/CAGL0H00957g/CAGL0M02695g/CAGL0K06149g/CAGL0G01826g/CAGL0M10197g/CAGL0G00990g/CAGL0M11616g/CAGL0I07975g/CAGL0J10032g/CAGL0M12144g/CAGL0J03476g/CAGL0I08393g/CAGL0C03355g/CAGL0J07678g/CAGL0I08327g
40	GO:0051083	'de novo' cotranslational protein folding	0	6	6	CAGL0L10560g/CAGL0G00154g/CAGL0C05379g/CAGL0K04741g/CAGL0L12540g/CAGL0M07161g
41	GO:0043039	tRNA aminoacylation	0	40	15	CAGL0A02189g/CAGL0K12012g/CAGL0A02112g/CAGL0F01705g/CAGL0M12991g/CAGL0J10406g/CAGL0K07656g/CAGL0H09372g/CAGL0C01947g/CAGL0G03091g/CAGL0A02090g/CAGL0K11726g/CAGL0G03311g/CAGL0J07744g/CAGL0L04532g
42	GO:0006450	regulation of translational fidelity	0	16	9	CAGL0L10560g/CAGL0G00154g/CAGL0D00616g/CAGL0F07073g/CAGL0L04840g/CAGL0C05379g/CAGL0M06501g/CAGL0K04741g/CAGL0I08327g
43	GO:0009168	purine ribonucleoside monophosphate biosynthetic process	0	16	9	CAGL0F02563g/CAGL0F03927g/CAGL0A03366g/CAGL0B02794g/CAGL0K05027g/CAGL0G07106g/CAGL0M00484g/CAGL0J05984g/CAGL0M13717g
44	GO:0006452	translational frameshifting	0	7	6	CAGL0I01430g/CAGL0L10560g/CAGL0G00154g/CAGL0C05379g/CAGL0K04741g/CAGL0L01353g
45	GO:0000028	ribosomal small subunit assembly	0	13	8	CAGL0K06061g/CAGL0L04510g/CAGL0L08118g/CAGL0G08173g/CAGL0J00737g/CAGL0K11748g/CAGL0K06149g/CAGL0C03355g
46	GO:1901135	carbohydrate derivative metabolic process	0	289	50	CAGL0H07579g/CAGL0K02409g/CAGL0H03993g/CAGL0F02563g/CAGL0M09581g/CAGL0H00506g/CAGL0H05489g/CAGL0F03927g/CAGL0A03366g/CAGL0I07969g/CAGL0A03036g/CAGL0K02541g/CAGL0M13277g/CAGL0B02794g/CAGL0I04686g/CAGL0K05027g/CAGL0B02717g/CAGL0H01397g/CAGL0G07106g/CAGL0A01111g/CAGL0L09713g/CAGL0M00484g/CAGL0D01562g/CAGL0K12848g/CAGL0C03630g/CAGL0H04191g/CAGL0F04433g/CAGL0L01331g/CAGL0L01925g/CAGL0K06281g/CAGL0H066…
47	GO:0006123	mitochondrial electron transport, cytochrome c to oxygen	0	10	7	CAGL0I01408g/CAGL0J00429g/CAGL0C01325g/CAGL0L06160g/CAGL0C02623g/CAGL0H02491g/CAGL0D00748g
48	GO:0000027	ribosomal large subunit assembly	0	22	10	CAGL0L11462g/CAGL0G02475g/CAGL0F02937g/CAGL0M02695g/CAGL0G01826g/CAGL0M10197g/CAGL0G00990g/CAGL0M11616g/CAGL0I07975g/CAGL0J03476g
49	GO:0001731	formation of translation preinitiation complex	0	8	6	CAGL0H02409g/CAGL0B03795g/CAGL0H00957g/CAGL0I08393g/CAGL0J07678g/CAGL0I08327g
50	GO:0006396	RNA processing	0	438	65	CAGL0K06061g/CAGL0I03234g/CAGL0L04510g/CAGL0L08118g/CAGL0J09086g/CAGL0L03846g/CAGL0G07227g/CAGL0M06303g/CAGL0J03234g/CAGL0L10560g/CAGL0K08382g/CAGL0H07975g/CAGL0K03135g/CAGL0G00154g/CAGL0I00792g/CAGL0M08118g/CAGL0H03685g/CAGL0E03938g/CAGL0J09614g/CAGL0G05027g/CAGL0G08173g/CAGL0B01203g/CAGL0J00737g/CAGL0A01540g/CAGL0M00814g/CAGL0K11748g/CAGL0L04840g/CAGL0C05379g/CAGL0M06501g/CAGL0J10802g/CAGL0I097…
51	GO:0042407	cristae formation	0	9	6	CAGL0K02409g/CAGL0G08195g/CAGL0I00572g/CAGL0G06600g/CAGL0K10516g/CAGL0B00396g
52	GO:0006417	regulation of translation	0	126	26	CAGL0I03476g/CAGL0K06061g/CAGL0L04510g/CAGL0L03846g/CAGL0I01430g/CAGL0L10978g/CAGL0J07898g/CAGL0F08547g/CAGL0F07073g/CAGL0M06501g/CAGL0A03234g/CAGL0J02816g/CAGL0G08041g/CAGL0F00627g/CAGL0L01353g/CAGL0J04576g/CAGL0K08888g/CAGL0M12144g/CAGL0B04961g/CAGL0K00495g/CAGL0H06281g/CAGL0D00726g/CAGL0L05544g/CAGL0I02926g/CAGL0D01826g/CAGL0I08327g
53	GO:0006399	tRNA metabolic process	0	163	31	CAGL0A02189g/CAGL0H07975g/CAGL0K12012g/CAGL0G10109g/CAGL0A02112g/CAGL0F01705g/CAGL0J04070g/CAGL0K01859g/CAGL0M12991g/CAGL0J10406g/CAGL0K07656g/CAGL0H09372g/CAGL0C03531g/CAGL0C01947g/CAGL0G03091g/CAGL0J03718g/CAGL0A02090g/CAGL0M09977g/CAGL0I07667g/CAGL0L03586g/CAGL0K11726g/CAGL0G03311g/CAGL0L02799g/CAGL0B04125g/CAGL0L03872g/CAGL0B01881g/CAGL0J07744g/CAGL0J07810g/CAGL0M05797g/CAGL0J09746g/CAGL0L045…
54	GO:0000054	ribosomal subunit export from nucleus	0.0001	45	13	CAGL0K06061g/CAGL0L04510g/CAGL0G00154g/CAGL0G02475g/CAGL0C05379g/CAGL0A02673g/CAGL0G08041g/CAGL0K04741g/CAGL0C02343g/CAGL0J11220g/CAGL0F02299g/CAGL0L06314g/CAGL0H00935g
55	GO:0006415	translational termination	0.0001	19	8	CAGL0I01430g/CAGL0F08547g/CAGL0C05379g/CAGL0J02816g/CAGL0G08041g/CAGL0L01353g/CAGL0L06754g/CAGL0L10021g
56	GO:0006458	'de novo' protein folding	0.0002	11	6	CAGL0L10560g/CAGL0G00154g/CAGL0C05379g/CAGL0K04741g/CAGL0L12540g/CAGL0M07161g
57	GO:0000469	cleavage involved in rRNA processing	0.0003	68	16	CAGL0K06061g/CAGL0L04510g/CAGL0G07227g/CAGL0K08382g/CAGL0M08118g/CAGL0J09614g/CAGL0B01203g/CAGL0J00737g/CAGL0J10802g/CAGL0I09790g/CAGL0I00594g/CAGL0F02299g/CAGL0H03773g/CAGL0I07975g/CAGL0B00352g/CAGL0C03355g
58	GO:0031503	protein-containing complex localization	0.0007	66	15	CAGL0K06061g/CAGL0L04510g/CAGL0G00154g/CAGL0G02475g/CAGL0C05379g/CAGL0A02673g/CAGL0G08041g/CAGL0K04741g/CAGL0C02343g/CAGL0J11440g/CAGL0J11220g/CAGL0F02299g/CAGL0L06314g/CAGL0M00770g/CAGL0H00935g
59	GO:0000470	maturation of LSU-rRNA	0.0008	35	10	CAGL0J09086g/CAGL0M08118g/CAGL0E03938g/CAGL0B01203g/CAGL0C03531g/CAGL0G09130g/CAGL0H03773g/CAGL0I07975g/CAGL0J10032g/CAGL0F07139g
60	GO:0006448	regulation of translational elongation	0.0009	19	7	CAGL0I03476g/CAGL0I01430g/CAGL0A03234g/CAGL0L01353g/CAGL0J04576g/CAGL0B04961g/CAGL0D01826g
61	GO:0006206	pyrimidine nucleobase metabolic process	0.001	10	5	CAGL0I09592g/CAGL0L05676g/CAGL0D01562g/CAGL0F04433g/CAGL0L09867g
62	GO:0055114	oxidation-reduction process	0.0013	186	30	CAGL0C03223g/CAGL0A03905g/CAGL0I00748g/CAGL0I03190g/CAGL0D00748g/CAGL0I07227g/CAGL0L05236g/CAGL0G08712g/CAGL0E04356g/CAGL0F06413g/CAGL0J00847g/CAGL0D00528g/CAGL0K06259g/CAGL0K10780g/CAGL0D00176g/CAGL0C04741g/CAGL0K10868g/CAGL0I00418g/CAGL0G02673g/CAGL0G07271g/CAGL0J02816g/CAGL0C02233g/CAGL0H06699g/CAGL0M09977g/CAGL0L06666g/CAGL0E06424g/CAGL0B02431g/CAGL0D06688g/CAGL0M13343g/CAGL0L02035g
63	GO:0072593	reactive oxygen species metabolic process	0.0014	15	6	CAGL0E04356g/CAGL0K06259g/CAGL0C04741g/CAGL0K10868g/CAGL0G07271g/CAGL0K05813g
64	GO:0006913	nucleocytoplasmic transport	0.0015	180	29	CAGL0K06061g/CAGL0L04510g/CAGL0G07227g/CAGL0G00154g/CAGL0H00462g/CAGL0M04873g/CAGL0F01045g/CAGL0E01991g/CAGL0G02475g/CAGL0K02123g/CAGL0F07073g/CAGL0L04840g/CAGL0C05379g/CAGL0A02673g/CAGL0I00594g/CAGL0I04730g/CAGL0G08041g/CAGL0K04741g/CAGL0C02343g/CAGL0G03003g/CAGL0J11440g/CAGL0J11220g/CAGL0D01188g/CAGL0F02299g/CAGL0L06314g/CAGL0K07832g/CAGL0G03443g/CAGL0H00935g/CAGL0L10021g
65	GO:0001522	pseudouridine synthesis	0.002	16	6	CAGL0H03685g/CAGL0J09614g/CAGL0J10802g/CAGL0H02057g/CAGL0J03718g/CAGL0M05797g
66	GO:0019856	pyrimidine nucleobase biosynthetic process	0.0035	8	4	CAGL0I09592g/CAGL0L05676g/CAGL0F04433g/CAGL0L09867g
67	GO:0031120	snRNA pseudouridine synthesis	0.0035	8	4	CAGL0J09614g/CAGL0J10802g/CAGL0H02057g/CAGL0J03718g
68	GO:0008299	isoprenoid biosynthetic process	0.004	18	6	CAGL0C04741g/CAGL0L00319g/CAGL0C03630g/CAGL0J06952g/CAGL0C04279g/CAGL0H04081g
69	GO:0000056	ribosomal small subunit export from nucleus	0.0043	13	5	CAGL0K06061g/CAGL0L04510g/CAGL0C02343g/CAGL0J11220g/CAGL0H00935g
70	GO:0007007	inner mitochondrial membrane organization	0.0044	24	7	CAGL0K02409g/CAGL0D01958g/CAGL0G08195g/CAGL0I00572g/CAGL0G06600g/CAGL0K10516g/CAGL0B00396g
71	GO:0034614	cellular response to reactive oxygen species	0.0044	24	7	CAGL0E04356g/CAGL0K06259g/CAGL0K03091g/CAGL0K10868g/CAGL0I00418g/CAGL0G07271g/CAGL0K05813g
72	GO:0045727	positive regulation of translation	0.0049	37	9	CAGL0I01430g/CAGL0J07898g/CAGL0F07073g/CAGL0M06501g/CAGL0A03234g/CAGL0G08041g/CAGL0L01353g/CAGL0D00726g/CAGL0I08327g
73	GO:0000154	rRNA modification	0.0054	19	6	CAGL0J09614g/CAGL0J10802g/CAGL0K01859g/CAGL0C03531g/CAGL0J03718g/CAGL0J10032g
74	GO:0098869	cellular oxidant detoxification	0.0059	9	4	CAGL0E04356g/CAGL0K06259g/CAGL0K10868g/CAGL0K05813g
75	GO:0002182	cytoplasmic translational elongation	0.0061	14	5	CAGL0L01353g/CAGL0J04576g/CAGL0D01188g/CAGL0K07832g/CAGL0B04961g
76	GO:0070301	cellular response to hydrogen peroxide	0.0061	14	5	CAGL0K06259g/CAGL0K03091g/CAGL0K10868g/CAGL0I00418g/CAGL0G07271g
77	GO:0000479	endonucleolytic cleavage of tricistronic rRNA transcript (SSU-rRNA, 5.8S rRNA, LSU-rRNA)	0.0061	45	10	CAGL0G07227g/CAGL0K08382g/CAGL0M08118g/CAGL0B01203g/CAGL0J00737g/CAGL0I09790g/CAGL0F02299g/CAGL0I07975g/CAGL0B00352g/CAGL0C03355g
78	GO:0006106	fumarate metabolic process	0.0065	5	3	CAGL0B02794g/CAGL0K05027g/CAGL0A01045g
79	GO:0006541	glutamine metabolic process	0.0065	5	3	CAGL0I09592g/CAGL0L05676g/CAGL0D00176g
80	GO:0030497	fatty acid elongation	0.0065	5	3	CAGL0K00583g/CAGL0L08184g/CAGL0G04851g
81	GO:0042744	hydrogen peroxide catabolic process	0.0065	5	3	CAGL0K06259g/CAGL0K10868g/CAGL0G07271g
82	GO:0000478	endonucleolytic cleavage involved in rRNA processing	0.0072	46	10	CAGL0G07227g/CAGL0K08382g/CAGL0M08118g/CAGL0B01203g/CAGL0J00737g/CAGL0I09790g/CAGL0F02299g/CAGL0I07975g/CAGL0B00352g/CAGL0C03355g
83	GO:0009063	cellular amino acid catabolic process	0.008	33	8	CAGL0B00286g/CAGL0M00176g/CAGL0I09592g/CAGL0L05676g/CAGL0C02189g/CAGL0G01254g/CAGL0M12188g/CAGL0H07051g
84	GO:0042797	tRNA transcription by RNA polymerase III	0.0085	15	5	CAGL0G10109g/CAGL0J04070g/CAGL0L02799g/CAGL0B04125g/CAGL0L03872g
85	GO:0006526	arginine biosynthetic process	0.0091	10	4	CAGL0C05115g/CAGL0B01507g/CAGL0I09592g/CAGL0I10791g
86	GO:0016114	terpenoid biosynthetic process	0.0091	10	4	CAGL0C04741g/CAGL0L00319g/CAGL0J06952g/CAGL0H04081g
87	GO:0007006	mitochondrial membrane organization	0.0114	49	10	CAGL0K02409g/CAGL0D01958g/CAGL0G08195g/CAGL0I00572g/CAGL0D04834g/CAGL0G06600g/CAGL0K10516g/CAGL0J10179g/CAGL0H06127g/CAGL0B00396g
88	GO:0006084	acetyl-CoA metabolic process	0.0115	16	5	CAGL0H03993g/CAGL0B02717g/CAGL0C03630g/CAGL0J04268g/CAGL0H04081g
89	GO:0097237	cellular response to toxic substance	0.0115	16	5	CAGL0E04356g/CAGL0K06259g/CAGL0K10868g/CAGL0L06666g/CAGL0K05813g
90	GO:0045337	farnesyl diphosphate biosynthetic process	0.0122	6	3	CAGL0L00319g/CAGL0J06952g/CAGL0H04081g
91	GO:0045903	positive regulation of translational fidelity	0.0122	6	3	CAGL0F07073g/CAGL0M06501g/CAGL0I08327g
92	GO:0042542	response to hydrogen peroxide	0.0151	17	5	CAGL0K06259g/CAGL0K03091g/CAGL0K10868g/CAGL0I00418g/CAGL0G07271g
93	GO:0006612	protein targeting to membrane	0.0158	44	9	CAGL0G08217g/CAGL0I00462g/CAGL0H00869g/CAGL0J11440g/CAGL0L12540g/CAGL0I05098g/CAGL0M07161g/CAGL0E05742g/CAGL0H05731g
94	GO:0006633	fatty acid biosynthetic process	0.018	24	6	CAGL0D00528g/CAGL0I00418g/CAGL0K00583g/CAGL0L08184g/CAGL0G04851g/CAGL0L10780g
95	GO:0006620	posttranslational protein targeting to endoplasmic reticulum membrane	0.0186	12	4	CAGL0L12540g/CAGL0I05098g/CAGL0M07161g/CAGL0H05731g
96	GO:0000463	maturation of LSU-rRNA from tricistronic rRNA transcript (SSU-rRNA, 5.8S rRNA, LSU-rRNA)	0.019	31	7	CAGL0J09086g/CAGL0M08118g/CAGL0B01203g/CAGL0H03773g/CAGL0I07975g/CAGL0J10032g/CAGL0F07139g
97	GO:0006144	purine nucleobase metabolic process	0.0193	18	5	CAGL0G07106g/CAGL0M00484g/CAGL0J05984g/CAGL0M13717g/CAGL0C04983g
98	GO:0008652	cellular amino acid biosynthetic process	0.0198	93	15	CAGL0C05115g/CAGL0B01507g/CAGL0M00176g/CAGL0E03157g/CAGL0I09592g/CAGL0D00176g/CAGL0K09724g/CAGL0J00649g/CAGL0M07876g/CAGL0C02233g/CAGL0I10791g/CAGL0M12386g/CAGL0I10648g/CAGL0D03190g/CAGL0K09328g
99	GO:0006116	NADH oxidation	0.0199	7	3	CAGL0I00748g/CAGL0H06699g/CAGL0B02431g
100	GO:0006207	'de novo' pyrimidine nucleobase biosynthetic process	0.0199	7	3	CAGL0I09592g/CAGL0L05676g/CAGL0L09867g

## Sheet: DEGs in Cgxbp1∆
List of differentially expressed genes upon fluconazole treatment in CgXBP1∆ strain
	Supplementary file 12 - CgXBP1∆_DEGs	Log2FC	P-value
	CAGL0C03223g	-3.13051	4.34555e-109
	CAGL0E02255g	-2.72052	2.85995e-15
	CAGL0C05621g	-2.37596	0.017622
	CAGL0L13392g	-2.09367	1.34094e-42
	CAGL0J00385g	-2.085	3.38419e-39
	CAGL0H10076g	-1.95581	1.19346e-60
	CAGL0B00286g	-1.93505	1.37987e-54
	CAGL0M07293g	-1.83435	6.40614e-32
	CAGL0F00176g	-1.81859	0.0302685
	CAGL0C05115g	-1.79537	7.59159e-22
	CAGL0J05390g	-1.69644	0.0151942
	CAGL0J00429g	-1.63819	1.85772e-50
	CAGL0J00363g	-1.60995	1.34636e-06
	CAGL0E04356g	-1.57024	9.65142e-32
	CAGL0C02623g	-1.52664	2.72107e-41
	CAGL0J01699g	-1.51813	4.36046e-30
	CAGL0A03542g	-1.50252	3.28539e-44
	CAGL0G10153g	-1.47446	1.46277e-51
	CAGL0K06039g	-1.47014	4.47715e-09
	CAGL0L06138g	-1.46786	2.51069e-34
	CAGL0C01325g	-1.46109	5.0297e-40
	CAGL0G03927g	-1.44787	3.17782e-27
	CAGL0I06270g	-1.44407	1.73971e-47
	CAGL0K02409g	-1.388	3.79361e-32
	CAGL0G08217g	-1.38112	2.17774e-12
	CAGL0L06160g	-1.37953	1.81015e-45
	CAGL0I03476g	-1.37681	3.86482e-30
	CAGL0G09262g	-1.34347	3.3903e-16
	CAGL0H03993g	-1.33262	1.63484e-25
	CAGL0I09592g	-1.32794	8.89745e-15
	CAGL0M00176g	-1.32084	5.12017e-29
	CAGL0H09064g	-1.31666	1.34988e-34
	CAGL0H00825g	-1.30437	9.97967e-15
	CAGL0I03190g	-1.30203	3.5669e-42
	CAGL0D06424g	-1.30046	9.20653e-30
	CAGL0G02871g	-1.29976	2.16872e-07
	CAGL0D00748g	-1.29352	2.12557e-23
	CAGL0H09328g	-1.29097	1.38956e-33
	CAGL0D05192g	-1.28779	8.0281e-31
	CAGL0H02491g	-1.28027	3.5893e-27
	CAGL0L10912g	-1.27232	3.57051e-13
	CAGL0G10131g	-1.25015	1.03028e-39
	CAGL0C02211g	-1.23652	1.31324e-35
	CAGL0I01408g	-1.23288	2.66283e-38
	CAGL0K06061g	-1.2123	6.04338e-22
	CAGL0F00231g	-1.2098	1.07744e-35
	CAGL0I10791g	-1.18776	3.59165e-06
	CAGL0D01958g	-1.17443	4.47033e-34
	CAGL0H07579g	-1.17386	3.15995e-13
	CAGL0G09273g	-1.15933	5.3788e-12
	CAGL0L08114g	-1.15014	2.4345e-16
	CAGL0F04213g	-1.14637	1.09943e-34
	CAGL0E04994g	-1.14228	1.56018e-17
	CAGL0G08712g	-1.1391	1.57103e-21
	CAGL0F04565g	-1.12519	1.59683e-29
	CAGL0J06380g	-1.12373	9.83433e-25
	CAGL0E03201g	-1.11075	1.99861e-29
	CAGL0B01507g	-1.10288	5.34016e-09
	CAGL0F02563g	-1.10044	1.30148e-15
	CAGL0I07227g	-1.09907	2.03478e-24
	CAGL0G05566g	-1.09758	3.46486e-18
	CAGL0E01771g	-1.09277	9.227e-14
	CAGL0M12925g	-1.08403	1.08298e-09
	CAGL0L05236g	-1.08101	5.0152e-18
	CAGL0F05863g	-1.08065	4.81995e-27
	CAGL0K05027g	-1.07446	7.68497e-19
	CAGL0C02629g	-1.06986	0.00149262
	CAGL0I06743g	-1.06818	4.47901e-12
	CAGL0I07969g	-1.06123	9.78095e-19
	CAGL0L10406g	-1.05966	7.27311e-27
	CAGL0F03927g	-1.05573	3.06066e-18
	CAGL0L01551g	-1.05362	1.71501e-28
	CAGL0I03234g	-1.05242	1.63166e-18
	CAGL0H05489g	-1.04266	4.90037e-25
	CAGL0K03135g	-1.03514	1.40442e-17
	CAGL0L10978g	-1.02212	1.66263e-15
	CAGL0J09086g	-1.02024	8.21034e-21
	CAGL0I01430g	-1.01754	7.20178e-25
	CAGL0A03036g	-1.01578	7.43336e-23
	CAGL0F00363g	-1.01469	6.40209e-21
	CAGL0M09581g	-1.00947	5.41995e-20
	CAGL0G07711g	-0.998869	3.7967e-22
	CAGL0B01122g	-0.991408	1.85819e-18
	CAGL0I04686g	-0.977485	6.60477e-25
	CAGL0K10780g	-0.977081	1.75979e-16
	CAGL0H00506g	-0.969519	8.16162e-25
	CAGL0M00946g	-0.969432	2.46016e-13
	CAGL0L13156g	-0.968214	5.14086e-16
	CAGL0A03905g	-0.967428	1.53689e-10
	CAGL0J06374g	-0.967172	1.71453e-13
	CAGL0J07766g	-0.962708	3.64067e-15
	CAGL0J03234g	-0.961871	3.17468e-15
	CAGL0M12386g	-0.96133	5.32889e-23
	CAGL0B04257g	-0.960876	1.37176e-16
	CAGL0D02090g	-0.959275	1.66721e-15
	CAGL0K06567g	-0.957839	5.1673e-18
	CAGL0D00176g	-0.955824	4.44189e-17
	CAGL0H07975g	-0.955513	4.03259e-13
	CAGL0A02189g	-0.953114	1.27118e-23
	CAGL0F05709g	-0.951945	3.94203e-09
	CAGL0B04345g	-0.95053	7.78424e-23
	CAGL0L10890g	-0.949842	6.69642e-16
	CAGL0G07106g	-0.949694	1.05196e-15
	CAGL0C02233g	-0.942907	4.06517e-16
	CAGL0K08382g	-0.94196	4.95936e-13
	CAGL0M06303g	-0.941473	6.76889e-14
	CAGL0L03872g	-0.94143	2.13853e-17
	CAGL0J00473g	-0.939158	3.46529e-14
	CAGL0I00814g	-0.938781	1.17127e-16
	CAGL0G07227g	-0.938292	4.39869e-16
	CAGL0G10109g	-0.936771	2.73288e-16
	CAGL0L08118g	-0.934142	7.98588e-16
	CAGL0M05995g	-0.933794	4.02116e-12
	CAGL0J07238g	-0.933764	1.14383e-14
	CAGL0E05478g	-0.932664	4.34284e-16
	CAGL0M02497g	-0.931334	1.27555e-14
	CAGL0K06259g	-0.931207	3.54816e-08
	CAGL0L04510g	-0.929158	3.41652e-20
	CAGL0J10802g	-0.928946	2.81805e-13
	CAGL0A03102g	-0.927777	4.23624e-15
	CAGL0L06204g	-0.927246	1.88202e-21
	CAGL0G09119g	-0.923592	6.97803e-10
	CAGL0M03861g	-0.923524	9.00588e-16
	CAGL0A01001g	-0.923033	3.00858e-07
	CAGL0F00407g	-0.921109	1.40429e-13
	CAGL0F01683g	-0.920051	8.40077e-14
	CAGL0A03278g	-0.916336	3.86562e-16
	CAGL0G08173g	-0.915657	2.07245e-12
	CAGL0A03168g	-0.911809	2.35852e-14
	CAGL0K02893g	-0.908887	3.78329e-14
	CAGL0A01540g	-0.908699	1.81429e-12
	CAGL0F08525g	-0.906613	3.16059e-15
	CAGL0G07271g	-0.905062	1.42641e-20
	CAGL0G06490g	-0.903765	1.8185e-15
	CAGL0J08679g	-0.903726	5.96032e-18
	CAGL0M06523g	-0.903701	2.21755e-14
	CAGL0A00979g	-0.903166	1.97429e-15
	CAGL0K12012g	-0.901433	2.81554e-15
	CAGL0G02079g	-0.898289	3.99087e-14
	CAGL0M06501g	-0.895789	9.01227e-12
	CAGL0H08734g	-0.892232	3.50181e-13
	CAGL0L02475g	-0.891578	7.1258e-15
	CAGL0L12870g	-0.890673	1.15831e-14
	CAGL0G00154g	-0.890672	3.87627e-15
	CAGL0D00616g	-0.88895	2.80021e-13
	CAGL0F04499g	-0.885376	5.90672e-11
	CAGL0L09713g	-0.884556	3.08226e-17
	CAGL0I05522g	-0.882207	1.10615e-13
	CAGL0B00792g	-0.881481	6.84213e-12
	CAGL0K07414g	-0.880863	1.63423e-13
	CAGL0H01397g	-0.878213	7.28702e-19
	CAGL0B00352g	-0.876785	2.74274e-13
	CAGL0G05940g	-0.874856	6.74201e-12
	CAGL0L03806g	-0.874851	1.10871e-13
	CAGL0A01562g	-0.874566	2.48939e-13
	CAGL0H03685g	-0.873942	5.08637e-14
	CAGL0I00748g	-0.8738	1.27502e-18
	CAGL0I08547g	-0.8736	1.01928e-12
	CAGL0A01804g	-0.870426	5.78067e-10
	CAGL0L08448g	-0.868523	5.0805e-19
	CAGL0G03575g	-0.868362	1.56259e-13
	CAGL0J02222g	-0.865424	7.40765e-11
	CAGL0I09790g	-0.865026	2.58524e-13
	CAGL0L10934g	-0.861786	2.27164e-10
	CAGL0H08976g	-0.86153	7.43961e-13
	CAGL0H04191g	-0.860711	1.76584e-17
	CAGL0G08041g	-0.858936	3.90497e-20
	CAGL0G05742g	-0.856165	1.22188e-10
	CAGL0G08151g	-0.853897	8.71491e-18
	CAGL0G02475g	-0.852365	2.59524e-13
	CAGL0M06589g	-0.85068	5.44777e-08
	CAGL0K06033g	-0.85006	6.70557e-11
	CAGL0F04433g	-0.847634	1.77432e-14
	CAGL0I07975g	-0.847363	2.60312e-10
	CAGL0F07073g	-0.845212	2.98403e-11
	CAGL0K12848g	-0.844998	1.84112e-17
	CAGL0I00792g	-0.842537	9.49122e-13
	CAGL0L07678g	-0.841613	6.33243e-10
	CAGL0M08118g	-0.837125	8.96468e-14
	CAGL0L12892g	-0.837121	1.76795e-13
	CAGL0G01078g	-0.836485	1.52288e-12
	CAGL0L08008g	-0.835565	2.20948e-13
	CAGL0K06149g	-0.834846	4.4336e-12
	CAGL0G09669g	-0.833845	1.44816e-15
	CAGL0K08888g	-0.832812	9.69883e-17
	CAGL0A02299g	-0.832087	8.93932e-08
	CAGL0A02112g	-0.830501	3.93895e-11
	CAGL0K06787g	-0.830391	2.93166e-19
	CAGL0I05500g	-0.830317	1.40487e-14
	CAGL0F08547g	-0.830162	3.1346e-11
	CAGL0D01606g	-0.828548	3.00416e-07
	CAGL0L06952g	-0.828194	2.21891e-14
	CAGL0H03377g	-0.82707	5.34165e-10
	CAGL0H03773g	-0.82702	2.64965e-15
	CAGL0E03938g	-0.826652	1.24927e-13
	CAGL0H07271g	-0.825747	0.000749847
	CAGL0H04521g	-0.823936	7.3678e-12
	CAGL0E02013g	-0.823723	1.52384e-10
	CAGL0H00462g	-0.823476	5.99221e-12
	CAGL0J10384g	-0.821631	6.99287e-12
	CAGL0M10197g	-0.821022	1.28577e-11
	CAGL0K02541g	-0.818687	3.814e-14
	CAGL0M02695g	-0.818399	1.18403e-11
	CAGL0K02739g	-0.818242	2.58453e-16
	CAGL0H05643g	-0.817529	1.41421e-15
	CAGL0L11462g	-0.815736	5.9436e-11
	CAGL0J02816g	-0.814893	3.29912e-10
	CAGL0K10906g	-0.813663	2.45046e-13
	CAGL0D00858g	-0.812706	1.97912e-08
	CAGL0B02794g	-0.812456	0.0264914
	CAGL0H02409g	-0.811803	4.21523e-12
	CAGL0E01991g	-0.810874	3.49141e-13
	CAGL0J00165g	-0.810786	8.21443e-12
	CAGL0J00737g	-0.810645	2.33354e-12
	CAGL0J04576g	-0.809331	3.5321e-12
	CAGL0D00528g	-0.80868	5.20224e-14
	CAGL0K06457g	-0.80861	9.70484e-12
	CAGL0M13277g	-0.807735	1.49675e-13
	CAGL0B03795g	-0.807599	9.67744e-17
	CAGL0G09130g	-0.804298	6.45994e-11
	CAGL0M04873g	-0.803016	9.78308e-11
	CAGL0C01639g	-0.802341	1.18976e-09
	CAGL0M12122g	-0.801073	4.23529e-15
	CAGL0G02409g	-0.797506	2.65028e-12
	CAGL0G01254g	-0.795744	7.7295e-16
	CAGL0L00341g	-0.795476	7.88757e-10
	CAGL0M06677g	-0.79436	4.27361e-13
	CAGL0I07799g	-0.794176	2.28731e-13
	CAGL0J10010g	-0.79218	4.8269e-12
	CAGL0I00462g	-0.791712	1.81162e-11
	CAGL0H05709g	-0.790437	2.36766e-12
	CAGL0M12408g	-0.789682	4.41999e-10
	CAGL0L06314g	-0.789397	2.50288e-12
	CAGL0L08110g	-0.789291	1.88592e-07
	CAGL0F07579g	-0.7888	7.86544e-10
	CAGL0E06424g	-0.787401	2.48932e-12
	CAGL0K06281g	-0.786094	1.28982e-10
	CAGL0M01056g	-0.785144	2.68502e-07
	CAGL0D05060g	-0.784899	1.76416e-13
	CAGL0J02354g	-0.784644	1.17621e-11
	CAGL0K02123g	-0.783783	1.49008e-10
	CAGL0G01826g	-0.783448	3.29669e-10
	CAGL0I10670g	-0.783029	2.14876e-10
	CAGL0D00880g	-0.781673	7.14537e-12
	CAGL0E02343g	-0.781079	8.30799e-12
	CAGL0J00847g	-0.779202	4.78655e-11
	CAGL0L02871g	-0.778093	1.25235e-09
	CAGL0K00605g	-0.777403	4.95291e-09
	CAGL0M07227g	-0.775903	3.54854e-11
	CAGL0F01045g	-0.775308	4.60422e-12
	CAGL0H02189g	-0.774392	2.41052e-08
	CAGL0G05027g	-0.774183	3.83559e-11
	CAGL0A02321g	-0.773792	2.73626e-10
	CAGL0M05775g	-0.772326	9.6833e-11
	CAGL0B04433g	-0.772131	3.36734e-11
	CAGL0E03157g	-0.771585	1.37596e-15
	CAGL0J11066g	-0.771473	8.03973e-10
	CAGL0I10560g	-0.771355	8.36318e-11
	CAGL0L06886g	-0.771318	4.26182e-11
	CAGL0I06380g	-0.770208	7.94081e-14
	CAGL0G01991g	-0.769656	5.04071e-14
	CAGL0M00814g	-0.769536	3.44148e-11
	CAGL0B01203g	-0.769113	7.75408e-08
	CAGL0L10560g	-0.76907	1.42382e-14
	CAGL0J10252g	-0.768995	1.15836e-09
	CAGL0J07898g	-0.768741	1.92298e-13
	CAGL0G07843g	-0.767409	4.44538e-10
	CAGL0I00594g	-0.7674	3.30201e-12
	CAGL0C03355g	-0.766894	1.12723e-07
	CAGL0B04125g	-0.766826	4.04679e-12
	CAGL0E03289g	-0.765268	3.99994e-14
	CAGL0J11462g	-0.763721	4.12876e-14
	CAGL0M10241g	-0.763625	4.89587e-11
	CAGL0C04301g	-0.762747	7.38076e-13
	CAGL0B02717g	-0.762395	6.39004e-16
	CAGL0L04840g	-0.76094	1.99646e-11
	CAGL0J10164g	-0.760161	2.73474e-11
	CAGL0L00561g	-0.759029	0.0311846
	CAGL0K03861g	-0.757829	7.3713e-12
	CAGL0L00495g	-0.7578	6.50436e-13
	CAGL0E01287g	-0.756344	9.55585e-13
	CAGL0E03069g	-0.755607	2.32739e-09
	CAGL0L11660g	-0.754219	4.99786e-09
	CAGL0M13849g	-0.753055	1.01712e-15
	CAGL0I00418g	-0.752971	1.81625e-16
	CAGL0A03366g	-0.752122	6.31163e-07
	CAGL0B01881g	-0.751568	1.9764e-12
	CAGL0C03531g	-0.7514	5.32145e-11
	CAGL0I06248g	-0.748636	1.74505e-11
	CAGL0H02937g	-0.74809	1.89199e-09
	CAGL0L00319g	-0.747525	1.40618e-14
	CAGL0M06083g	-0.747314	1.31487e-12
	CAGL0J09746g	-0.747297	2.98481e-09
	CAGL0L10516g	-0.746697	2.07461e-10
	CAGL0A03388g	-0.74663	4.70176e-11
	CAGL0M13717g	-0.746084	4.81216e-07
	CAGL0C02343g	-0.745946	1.35279e-13
	CAGL0J10890g	-0.743986	2.05457e-11
	CAGL0M11616g	-0.743581	1.30687e-05
	CAGL0F09031g	-0.743349	3.38029e-11
	CAGL0M02849g	-0.743313	5.99407e-10
	CAGL0M13431g	-0.74199	8.97868e-08
	CAGL0I05940g	-0.741955	1.57677e-10
	CAGL0H08415g	-0.741633	7.76131e-07
	CAGL0J00957g	-0.740816	1.01671e-11
	CAGL0M08030g	-0.740185	1.54267e-06
	CAGL0C03369g	-0.739325	3.05691e-13
	CAGL0H00440g	-0.736771	5.16022e-10
	CAGL0F02299g	-0.733849	4.90492e-08
	CAGL0L11638g	-0.733335	4.91318e-09
	CAGL0G09713g	-0.732298	6.60815e-08
	CAGL0K09460g	-0.731054	1.0567e-09
	CAGL0F00627g	-0.729704	2.54506e-10
	CAGL0D05214g	-0.729464	1.86556e-06
	CAGL0K07656g	-0.727407	7.04387e-12
	CAGL0M00484g	-0.727149	7.12348e-11
	CAGL0E03245g	-0.726724	9.8098e-11
	CAGL0J03476g	-0.726527	7.36613e-10
	CAGL0H02431g	-0.726283	1.85113e-05
	CAGL0H03707g	-0.726126	4.72888e-13
	CAGL0J10362g	-0.724819	5.72946e-11
	CAGL0K04741g	-0.724423	4.48713e-15
	CAGL0E02937g	-0.724191	0.000257177
	CAGL0F01705g	-0.723881	6.08889e-14
	CAGL0C05379g	-0.723833	1.00097e-09
	CAGL0J11220g	-0.723689	8.20315e-09
	CAGL0K01991g	-0.723274	1.08998e-11
	CAGL0J06006g	-0.72296	5.53795e-08
	CAGL0A04521g	-0.72286	2.19059e-09
	CAGL0F02937g	-0.721056	1.15199e-10
	CAGL0L06754g	-0.720214	6.52168e-13
	CAGL0E05676g	-0.719719	1.35368e-11
	CAGL0L10868g	-0.718656	1.75059e-10
	CAGL0K01859g	-0.71765	8.69663e-11
	CAGL0J09614g	-0.716286	5.84773e-10
	CAGL0H00869g	-0.715309	2.56812e-12
	CAGL0D00726g	-0.714324	0.000116549
	CAGL0L03025g	-0.710931	3.73141e-08
	CAGL0M01430g	-0.709138	2.41646e-09
	CAGL0G00484g	-0.708831	7.88837e-07
	CAGL0F06809g	-0.708425	9.99139e-10
	CAGL0G04411g	-0.7083	1.12719e-08
	CAGL0M12188g	-0.707623	1.40866e-05
	CAGL0M01804g	-0.707398	4.62097e-11
	CAGL0M13519g	-0.706767	1.60958e-08
	CAGL0J01848g	-0.706242	6.13787e-12
	CAGL0G04631g	-0.706051	5.82679e-09
	CAGL0I07997g	-0.705911	2.58873e-09
	CAGL0M12991g	-0.705009	3.09702e-10
	CAGL0L04950g	-0.704668	4.0584e-09
	CAGL0D00220g	-0.704513	8.34231e-08
	CAGL0B04169g	-0.70366	1.02709e-09
	CAGL0H09372g	-0.702782	6.09313e-09
	CAGL0L02453g	-0.702474	4.6046e-09
	CAGL0I00572g	-0.701609	1.68651e-11
	CAGL0H02057g	-0.699624	1.27951e-12
	CAGL0K11748g	-0.698702	1.25438e-08
	CAGL0G06248g	-0.697783	1.57282e-08
	CAGL0D00550g	-0.697278	1.2948e-10
	CAGL0A04015g	-0.696729	1.41596e-09
	CAGL0I08613g	-0.694757	9.01352e-09
	CAGL0H04147g	-0.694403	0.00222691
	CAGL0I03608g	-0.694395	1.0427e-07
	CAGL0F06897g	-0.694259	1.01431e-08
	CAGL0G03443g	-0.694085	1.3731e-11
	CAGL0L09669g	-0.693811	8.3355e-08
	CAGL0D04180g	-0.693019	2.69559e-10
	CAGL0F04983g	-0.692139	2.57916e-09
	CAGL0J11154g	-0.69202	7.91223e-07
	CAGL0F06853g	-0.691562	3.924e-08
	CAGL0L02035g	-0.690556	7.85628e-10
	CAGL0M11110g	-0.690378	1.85823e-08
	CAGL0J04268g	-0.689842	4.48019e-10
	CAGL0G00990g	-0.68928	3.7731e-08
	CAGL0M06369g	-0.686984	1.70617e-08
	CAGL0A01958g	-0.686961	9.79062e-09
	CAGL0H04675g	-0.685714	5.8635e-10
	CAGL0K02233g	-0.68521	3.30481e-10
	CAGL0H00957g	-0.684729	1.84766e-11
	CAGL0A02090g	-0.68291	6.74702e-10
	CAGL0A03234g	-0.681792	1.82774e-10
	CAGL0G08195g	-0.680938	3.33232e-10
	CAGL0J10912g	-0.68085	5.00233e-08
	CAGL0L08756g	-0.680711	2.06367e-08
	CAGL0E05280g	-0.680313	0.000329219
	CAGL0D05874g	-0.679077	2.48347e-08
	CAGL0M11154g	-0.677916	1.94247e-09
	CAGL0E03223g	-0.677259	4.96388e-07
	CAGL0K02211g	-0.676829	1.31831e-07
	CAGL0M07832g	-0.675409	0.00040417
	CAGL0E01463g	-0.675216	6.78214e-11
	CAGL0G03795g	-0.675024	2.73462e-10
	CAGL0H10406g	-0.674953	5.59146e-08
	CAGL0I03080g	-0.674894	6.89274e-09
	CAGL0I02398g	-0.674188	1.629e-09
	CAGL0M13893g	-0.673968	7.57525e-12
	CAGL0F06501g	-0.67281	6.44613e-06
	CAGL0J11440g	-0.672708	9.11823e-13
	CAGL0C01221g	-0.672678	8.43118e-12
	CAGL0M09845g	-0.672367	4.67769e-09
	CAGL0H05731g	-0.672171	4.99576e-10
	CAGL0L05566g	-0.671237	5.84775e-08
	CAGL0D04884g	-0.670508	1.04271e-09
	CAGL0G03003g	-0.668348	6.66593e-10
	CAGL0D02706g	-0.667222	7.19412e-09
	CAGL0M03487g	-0.666369	6.87158e-09
	CAGL0J07744g	-0.665751	4.82379e-12
	CAGL0K11231g	-0.664993	1.25005e-10
	CAGL0J10032g	-0.664658	2.64296e-08
	CAGL0H08195g	-0.662908	2.85064e-09
	CAGL0I03366g	-0.662639	2.49783e-06
	CAGL0C05181g	-0.66182	5.44044e-08
	CAGL0J03718g	-0.66049	3.45789e-10
	CAGL0J05984g	-0.659389	1.93354e-06
	CAGL0M03905g	-0.659104	5.14407e-07
	CAGL0A00495g	-0.658236	3.21374e-13
	CAGL0L13024g	-0.657176	1.24229e-06
	CAGL0F03333g	-0.657073	1.14315e-07
	CAGL0J06952g	-0.656551	4.13679e-09
	CAGL0A01782g	-0.65241	4.91171e-11
	CAGL0F08481g	-0.652149	7.85679e-06
	CAGL0H04829g	-0.651687	0.00206545
	CAGL0E05500g	-0.650037	4.04401e-07
	CAGL0L05148g	-0.649936	1.67902e-10
	CAGL0A02365g	-0.649511	7.22686e-10
	CAGL0M02805g	-0.649511	6.77453e-09
	CAGL0C01749g	-0.64858	9.69452e-09
	CAGL0H00286g	-0.648427	4.02264e-06
	CAGL0I10538g	-0.648396	1.42809e-06
	CAGL0F00561g	-0.648131	9.23283e-07
	CAGL0F06127g	-0.647591	1.5579e-07
	CAGL0L02387g	-0.647149	2.58661e-05
	CAGL0D03718g	-0.646605	1.50668e-10
	CAGL0H01419g	-0.646538	4.40673e-09
	CAGL0C03311g	-0.646452	0.0042885
	CAGL0A01111g	-0.646388	5.8791e-09
	CAGL0J04070g	-0.646001	1.74758e-08
	CAGL0G07535g	-0.645986	1.01346e-06
	CAGL0K09042g	-0.645765	7.54629e-07
	CAGL0I07667g	-0.644658	1.81219e-08
	CAGL0L08184g	-0.643428	2.46122e-10
	CAGL0M04829g	-0.643294	2.5947e-08
	CAGL0E00979g	-0.643162	1.49401e-09
	CAGL0B00374g	-0.642417	0.000963882
	CAGL0F07139g	-0.642344	4.47876e-09
	CAGL0F09119g	-0.640927	4.59598e-07
	CAGL0J04334g	-0.640076	0.00304659
	CAGL0K07183g	-0.6387	5.2367e-05
	CAGL0M07876g	-0.636125	1.65849e-06
	CAGL0L07656g	-0.635636	5.34927e-10
	CAGL0L12782g	-0.634936	1.83689e-06
	CAGL0C01573g	-0.634825	1.5415e-10
	CAGL0H00935g	-0.634591	2.83484e-07
	CAGL0L07370g	-0.63366	5.27523e-09
	CAGL0H10252g	-0.631896	1.014e-05
	CAGL0M00638g	-0.63121	5.09706e-08
	CAGL0K02387g	-0.630372	9.36848e-08
	CAGL0C03740g	-0.629124	5.12862e-06
	CAGL0M05797g	-0.628685	0.000608471
	CAGL0L11176g	-0.628454	5.20209e-06
	CAGL0D01188g	-0.628444	2.3325e-10
	CAGL0D03454g	-0.627954	2.06731e-08
	CAGL0K09284g	-0.627045	9.55862e-08
	CAGL0E06534g	-0.627033	9.57263e-08
	CAGL0H06017g	-0.625233	0.000497882
	CAGL0H09724g	-0.625022	2.89214e-07
	CAGL0M07678g	-0.623997	1.18077e-06
	CAGL0I06006g	-0.622768	2.62371e-06
	CAGL0E05742g	-0.621308	1.05877e-10
	CAGL0F01023g	-0.621055	3.0595e-06
	CAGL0K07832g	-0.620615	6.30676e-09
	CAGL0H01045g	-0.620292	0.000128771
	CAGL0F06435g	-0.620276	0.0234671
	CAGL0I04356g	-0.617955	7.70642e-10
	CAGL0G05115g	-0.617163	5.8428e-06
	CAGL0C03630g	-0.616664	5.92114e-09
	CAGL0L08068g	-0.613857	1.262e-08
	CAGL0F06237g	-0.613789	5.46985e-08
	CAGL0K08360g	-0.61353	9.66526e-09
	CAGL0H02607g	-0.61352	1.54432e-08
	CAGL0M06941g	-0.613356	1.98572e-05
	CAGL0E04246g	-0.61245	0.000823023
	CAGL0H08800g	-0.611722	1.54599e-07
	CAGL0C00737g	-0.611472	2.18133e-07
	CAGL0F04103g	-0.61135	6.99064e-08
	CAGL0I03344g	-0.611056	1.83212e-06
	CAGL0I06985g	-0.610411	1.8709e-05
	CAGL0E05874g	-0.610184	7.01042e-07
	CAGL0B01232g	-0.610175	1.6232e-08
	CAGL0M00154g	-0.609911	3.23635e-09
	CAGL0K09240g	-0.609677	0.00230133
	CAGL0L06666g	-0.60792	5.74528e-05
	CAGL0G06600g	-0.606482	6.18482e-06
	CAGL0E01221g	-0.606133	1.58503e-06
	CAGL0J00341g	-0.606069	4.03032e-10
	CAGL0G03091g	-0.605634	3.4043e-09
	CAGL0M04279g	-0.605248	1.59716e-06
	CAGL0L03586g	-0.60522	4.01863e-08
	CAGL0I01232g	-0.603107	1.56639e-07
	CAGL0J00869g	-0.60286	8.1467e-06
	CAGL0L02849g	-0.602787	2.19589e-09
	CAGL0F01551g	-0.602011	5.72994e-05
	CAGL0I04730g	-0.601424	3.36985e-08
	CAGL0I09856g	-0.600931	5.77722e-06
	CAGL0M12430g	-0.600187	2.31424e-09
	CAGL0L01243g	-0.599813	1.67027e-09
	CAGL0E02673g	-0.599784	2.56786e-07
	CAGL0D04290g	-0.599325	4.37454e-10
	CAGL0E05764g	-0.598967	3.45522e-06
	CAGL0I00440g	-0.598558	6.38491e-07
	CAGL0D02838g	-0.598405	1.23032e-07
	CAGL0K09966g	-0.597236	4.7654e-09
	CAGL0J07722g	-0.597206	1.88108e-06
	CAGL0K02937g	-0.596573	1.24001e-06
	CAGL0I04328g	-0.595862	0.000170395
	CAGL0M00572g	-0.595615	7.87401e-05
	CAGL0M00874g	-0.594649	1.97068e-06
	CAGL0K01089g	-0.594358	5.15421e-07
	CAGL0F08129g	-0.59421	1.91711e-07
	CAGL0I10494g	-0.593905	1.44632e-07
	CAGL0E01925g	-0.592735	2.01661e-05
	CAGL0K04345g	-0.592004	7.70294e-10
	CAGL0I02926g	-0.591017	5.09766e-08
	CAGL0M04961g	-0.590937	5.11575e-08
	CAGL0B03927g	-0.590521	2.49161e-08
	CAGL0D03124g	-0.588221	7.54241e-07
	CAGL0F05247g	-0.58812	1.76318e-05
	CAGL0B00396g	-0.587971	1.75035e-07
	CAGL0I02684g	-0.586726	9.1673e-05
	CAGL0M07139g	0.585828	1.29428e-06
	CAGL0L12342g	0.586925	1.13388e-06
	CAGL0G06094g	0.587519	1.65034e-06
	CAGL0K03487g	0.587661	7.37985e-09
	CAGL0D05302g	0.587816	1.29016e-05
	CAGL0H01111g	0.58782	0.0149488
	CAGL0I05478g	0.588963	1.0418e-07
	CAGL0J04906g	0.58904	0.000174641
	CAGL0E01177g	0.589446	8.34275e-09
	CAGL0H04543g	0.589536	0.00163543
	CAGL0H05291g	0.59146	7.77736e-06
	CAGL0K01353g	0.591657	4.84884e-06
	CAGL0H05841g	0.592343	0.00139915
	CAGL0K11594g	0.5931	6.08657e-05
	CAGL0K10978g	0.59355	1.10869e-06
	CAGL0K02585g	0.593706	0.000195451
	CAGL0E01331g	0.593886	9.92839e-08
	CAGL0M08624g	0.593984	0.00111538
	CAGL0G07623g	0.594198	6.08418e-06
	CAGL0M12793g	0.594511	0.0108776
	CAGL0L12914g	0.595601	1.35469e-06
	CAGL0E06006g	0.596336	1.43096e-05
	CAGL0G07733g	0.598044	6.021e-06
	CAGL0F07821g	0.598774	5.87634e-08
	CAGL0B04763g	0.599361	0.000326902
	CAGL0F01881g	0.599849	0.00135583
	CAGL0G07667g	0.600439	5.90246e-06
	CAGL0G07175g	0.601718	0.00245348
	CAGL0G05720g	0.602381	0.00088999
	CAGL0L09933g	0.60287	4.76136e-07
	CAGL0H10208g	0.60416	1.18199e-07
	CAGL0G00550g	0.605364	7.50321e-06
	CAGL0M07656g	0.609451	4.59288e-10
	CAGL0K11341g	0.609451	2.64382e-06
	CAGL0E03025g	0.609977	3.23794e-07
	CAGL0E04774g	0.612109	4.04249e-06
	CAGL0G05329g	0.613121	0.00749593
	CAGL0M05665g	0.614014	8.88964e-07
	CAGL0D05280g	0.615017	6.43309e-07
	CAGL0F04191g	0.615018	0.000996289
	CAGL0K05137g	0.616136	8.56533e-07
	CAGL0J05159g	0.616143	0.00255611
	CAGL0I10211g	0.616514	0.00543913
	CAGL0F04697g	0.618781	8.96346e-06
	CAGL0M07001g	0.619034	0.00212417
	CAGL0M04147g	0.619318	5.04398e-09
	CAGL0G09515g	0.620695	2.51093e-05
	CAGL0A02618g	0.622413	0.000141726
	CAGL0I05830g	0.62248	6.62304e-08
	CAGL0M05533g	0.623367	1.11931e-08
	CAGL0L02321g	0.625133	0.000246265
	CAGL0H04103g	0.625706	8.46818e-09
	CAGL0E02981g	0.626064	4.86653e-05
	CAGL0M04675g	0.627256	0.000193819
	CAGL0B02695g	0.630538	1.22301e-05
	CAGL0G05676g	0.630688	6.87449e-06
	CAGL0I07821g	0.631623	1.27714e-08
	CAGL0I09482g	0.632301	3.91688e-09
	CAGL0G06314g	0.632323	2.682e-08
	CAGL0G01903g	0.63271	0.000133354
	CAGL0H09548g	0.633682	4.43263e-09
	CAGL0M12859g	0.634888	1.23998e-11
	CAGL0J11770g	0.634898	3.56801e-11
	CAGL0K12364g	0.635389	0.0174088
	CAGL0J07436g	0.635472	7.84864e-09
	CAGL0K05423g	0.636267	2.46507e-07
	CAGL0M07612g	0.63718	5.23134e-09
	CAGL0K02761g	0.63771	1.48058e-08
	CAGL0M00594g	0.640313	9.55366e-09
	CAGL0F05027g	0.641013	0.00653324
	CAGL0K10824g	0.641378	8.30499e-07
	CAGL0M09108g	0.641399	1.06998e-09
	CAGL0J05302g	0.642351	5.46241e-07
	CAGL0K04521g	0.643397	7.11081e-06
	CAGL0M06633g	0.643836	1.0303e-05
	CAGL0I01276g	0.644724	0.00103064
	CAGL0M03971g	0.644744	0.000647139
	CAGL0J07018g	0.645082	3.87458e-05
	CAGL0D06292g	0.645097	1.70811e-11
	CAGL0C01837g	0.646902	0.00029148
	CAGL0E03630g	0.648514	8.59878e-06
	CAGL0I00836g	0.648772	1.97375e-08
	CAGL0D02926g	0.650741	2.34138e-07
	CAGL0J06050g	0.651907	5.24944e-07
	CAGL0M04565g	0.653727	1.63471e-07
	CAGL0I00528g	0.653866	7.74016e-05
	CAGL0M01320g	0.654948	7.45961e-09
	CAGL0C03597g	0.654965	3.29875e-07
	CAGL0M10417g	0.657718	1.08207e-06
	CAGL0L02167g	0.657839	7.0361e-05
	CAGL0J11176g	0.658319	1.44416e-06
	CAGL0H03663g	0.659463	9.51978e-05
	CAGL0L12320g	0.6597	9.54927e-05
	CAGL0A01694g	0.660455	5.46432e-05
	CAGL0M09647g	0.660507	3.70698e-05
	CAGL0M14025g	0.660823	5.03439e-06
	CAGL0J07612g	0.661817	2.58271e-07
	CAGL0E05192g	0.661962	0.0104359
	CAGL0M13255g	0.662213	8.076e-08
	CAGL0G06842g	0.662227	6.52925e-09
	CAGL0J08866g	0.662252	0.00139053
	CAGL0A04301g	0.663185	7.7445e-07
	CAGL0D01782g	0.663489	3.52873e-07
	CAGL0K02101g	0.664369	2.3434e-08
	CAGL0H10362g	0.664871	2.07686e-07
	CAGL0G01342g	0.665474	3.86809e-09
	CAGL0J02684g	0.668612	5.14067e-06
	CAGL0C00451g	0.669418	1.15635e-07
	CAGL0B03817g	0.669444	2.16054e-05
	CAGL0L04312g	0.670759	1.66375e-10
	CAGL0C05489g	0.672367	8.98379e-07
	CAGL0D01100g	0.672813	3.4686e-08
	CAGL0G00946g	0.673705	8.67069e-08
	CAGL0B03839g	0.674084	2.64138e-05
	CAGL0F07513g	0.675331	4.75999e-06
	CAGL0A01177g	0.676298	2.47707e-08
	CAGL0G07293g	0.677704	9.16087e-11
	CAGL0J09570g	0.678018	1.8963e-08
	CAGL0G05511g	0.678383	8.37185e-08
	CAGL0M14047g	0.67921	8.47831e-08
	CAGL0D03036g	0.680881	7.22779e-07
	CAGL0M03399g	0.681291	3.89078e-06
	CAGL0L04268g	0.682497	8.1464e-06
	CAGL0K09504g	0.68252	4.80085e-05
	CAGL0I09306g	0.686156	0.000248891
	CAGL0M05115g	0.686365	0.0272942
	CAGL0E05214g	0.687354	9.66069e-07
	CAGL0A01716g	0.687525	1.68162e-06
	CAGL0D01518g	0.687953	0.000391713
	CAGL0A00517g	0.688308	1.1306e-09
	CAGL0J08976g	0.689402	0.000504164
	CAGL0L01947g	0.690371	1.10959e-08
	CAGL0H02695g	0.691882	4.38592e-06
	CAGL0B03949g	0.692603	8.8955e-10
	CAGL0J09350g	0.692668	1.08777e-12
	CAGL0F01199g	0.692906	1.84963e-10
	CAGL0L02717g	0.694782	4.07657e-08
	CAGL0H03091g	0.698857	8.78169e-08
	CAGL0A02750g	0.700392	1.61574e-10
	CAGL0K12540g	0.702743	0.000641778
	CAGL0I07865g	0.704918	1.37755e-08
	CAGL0H01639g	0.705482	0.00027482
	CAGL0J02508g	0.705576	4.69019e-08
	CAGL0M03047g	0.705981	8.33542e-08
	CAGL0I05170g	0.708677	8.69112e-12
	CAGL0D06490g	0.708772	2.4202e-05
	CAGL0G09020g	0.70905	8.77232e-07
	CAGL0H08998g	0.710231	1.39023e-07
	CAGL0G04697g	0.710608	1.9924e-08
	CAGL0K10714g	0.712827	4.44434e-05
	CAGL0I05390g	0.714254	6.29701e-12
	CAGL0I03652g	0.715337	3.47244e-08
	CAGL0M10219g	0.717868	7.75005e-10
	CAGL0D02266g	0.718333	2.42914e-06
	CAGL0G05962g	0.719239	3.33154e-06
	CAGL0J07414g	0.719646	2.76503e-06
	CAGL0K00341g	0.720587	0.00182787
	CAGL0K07458g	0.720734	1.14426e-09
	CAGL0J01397g	0.721605	0.000710802
	CAGL0H10054g	0.722124	5.29778e-09
	CAGL0K11836g	0.725456	2.84505e-06
	CAGL0H05621g	0.725829	7.15656e-11
	CAGL0L02519g	0.726148	1.84729e-06
	CAGL0K10494g	0.726415	7.22753e-12
	CAGL0M13937g	0.727891	9.28405e-08
	CAGL0M02343g	0.730266	0.00275959
	CAGL0J07282g	0.731395	6.03458e-06
	CAGL0B02948g	0.732609	0.00220365
	CAGL0F05071g	0.734188	0.000346789
	CAGL0M13783g	0.734881	3.64454e-10
	CAGL0L03355g	0.735428	2.68811e-06
	CAGL0L09999g	0.735594	2.89589e-05
	CAGL0M00880g	0.736331	4.41106e-07
	CAGL0K01683g	0.736763	1.30945e-09
	CAGL0K11682g	0.737984	3.67863e-05
	CAGL0E05170g	0.739155	6.38035e-10
	CAGL0H06633g	0.739513	0.000388775
	CAGL0H03289g	0.741122	3.79188e-08
	CAGL0M07205g	0.741619	1.00899e-08
	CAGL0J08096g	0.744367	1.22781e-08
	CAGL0L09383g	0.744381	3.35825e-07
	CAGL0J07590g	0.744946	2.02484e-09
	CAGL0M07403g	0.747487	1.15026e-05
	CAGL0D03982g	0.747595	1.80473e-06
	CAGL0F07799g	0.748822	1.60293e-12
	CAGL0C04092g	0.748861	3.75062e-07
	CAGL0H07315g	0.749029	0.000332109
	CAGL0L08250g	0.749516	9.29969e-14
	CAGL0H09504g	0.75027	1.54244e-07
	CAGL0K03443g	0.751354	1.22508e-08
	CAGL0M05467g	0.752132	7.86583e-05
	CAGL0L06402g	0.755104	7.07678e-14
	CAGL0K12254g	0.755123	2.85957e-08
	CAGL0H09416g	0.755372	3.15496e-13
	CAGL0I09086g	0.757348	1.74802e-09
	CAGL0K08734g	0.760376	9.13986e-06
	CAGL0H02717g	0.761487	0.00149237
	CAGL0E03828g	0.762543	9.26051e-13
	CAGL0E01529g	0.762554	1.78649e-09
	CAGL0K06105g	0.763392	2.96047e-07
	CAGL0J00803g	0.763901	1.26737e-11
	CAGL0J05060g	0.763943	1.23311e-10
	CAGL0G03047g	0.76646	1.13654e-06
	CAGL0M04125g	0.767342	2.15088e-11
	CAGL0D00352g	0.76844	1.50561e-06
	CAGL0K02629g	0.768601	3.55102e-07
	CAGL0M12496g	0.768771	7.38539e-09
	CAGL0I04224g	0.769035	1.2134e-11
	CAGL0K00869g	0.77022	0.00528259
	CAGL0E05918g	0.770792	4.44745e-08
	CAGL0H04785g	0.773805	1.063e-11
	CAGL0L02937g	0.775423	0.000151109
	CAGL0L01507g	0.77642	7.24393e-14
	CAGL0L00957g	0.776702	2.69837e-08
	CAGL0L01683g	0.777215	0.00197685
	CAGL0H04631g	0.777662	1.00015e-12
	CAGL0L12276g	0.7793	4.23447e-11
	CAGL0M13981g	0.780075	6.24424e-11
	CAGL0M06347g	0.780206	4.55026e-09
	CAGL0H02585g	0.780965	4.73552e-06
	CAGL0H10186g	0.781989	3.4653e-13
	CAGL0J04686g	0.784847	4.39805e-05
	CAGL0G09152g	0.787474	5.16181e-08
	CAGL0C01771g	0.792857	7.56598e-06
	CAGL0E04488g	0.792956	2.73221e-11
	CAGL0K08206g	0.793155	0.000170916
	CAGL0M10439g	0.793229	6.5529e-09
	CAGL0M12969g	0.795438	1.25564e-05
	CAGL0L07480g	0.796127	9.20082e-11
	CAGL0D00264g	0.797873	0.000320472
	CAGL0J05874g	0.800564	2.41273e-07
	CAGL0G04741g	0.802702	7.86709e-05
	CAGL0H10428g	0.803696	1.35904e-09
	CAGL0I03872g	0.80426	3.87977e-10
	CAGL0C05533g	0.804631	2.90631e-06
	CAGL0J01353g	0.804673	6.84511e-14
	CAGL0J06270g	0.805191	1.53837e-07
	CAGL0J08481g	0.808703	2.59149e-09
	CAGL0M05445g	0.808905	2.55046e-08
	CAGL0H01837g	0.810042	3.09101e-12
	CAGL0J05082g	0.81022	2.76299e-08
	CAGL0M01452g	0.810313	1.38924e-05
	CAGL0J09592g	0.811762	4.44628e-09
	CAGL0B04455g	0.813792	0.0108467
	CAGL0B04103g	0.814054	5.28172e-10
	CAGL0K03575g	0.81516	2.60177e-05
	CAGL0J09372g	0.815423	2.60448e-13
	CAGL0J08547g	0.815618	1.64477e-05
	CAGL0I10450g	0.817093	0.00326393
	CAGL0C03509g	0.817423	8.79093e-13
	CAGL0J11968g	0.820129	3.11025e-06
	CAGL0B03465g	0.820492	5.58811e-05
	CAGL0M00550g	0.820982	2.91497e-06
	CAGL0C02981g	0.822032	4.21561e-10
	CAGL0J01441g	0.822279	3.70498e-12
	CAGL0M02189g	0.822879	4.00636e-10
	CAGL0F01859g	0.82348	0.000495735
	CAGL0H03113g	0.825552	4.24353e-07
	CAGL0L03267g	0.827631	5.79908e-05
	CAGL0H06853g	0.827876	4.17257e-10
	CAGL0D06402g	0.829304	2.40965e-06
	CAGL0B00946g	0.83053	2.98553e-12
	CAGL0L09493g	0.832057	4.13347e-07
	CAGL0I05896g	0.833055	2.39347e-14
	CAGL0K03839g	0.83373	6.36058e-07
	CAGL0J08371g	0.833793	0.0114642
	CAGL0E00627g	0.834225	3.73927e-10
	CAGL0G04939g	0.8361	0.000360201
	CAGL0M12056g	0.837257	0.0162523
	CAGL0G01892g	0.841441	2.08866e-09
	CAGL0I02970g	0.842419	4.7706e-17
	CAGL0L02607g	0.844143	1.24829e-05
	CAGL0B03201g	0.844465	1.04096e-06
	CAGL0K00231g	0.846426	1.38107e-09
	CAGL0C01397g	0.84805	0.00161281
	CAGL0L00227g	0.850184	2.95117e-06
	CAGL0M01892g	0.850269	0.00572869
	CAGL0L01771g	0.851917	2.41389e-10
	CAGL0H08558g	0.852006	8.30507e-11
	CAGL0F03113g	0.852467	1.32707e-10
	CAGL0G09064g	0.853261	7.1121e-05
	CAGL0K11616g	0.855418	6.83495e-09
	CAGL0M08206g	0.856482	5.16583e-17
	CAGL0L01177g	0.856565	1.38225e-13
	CAGL0H03135g	0.857667	3.94545e-05
	CAGL0M02079g	0.858558	5.4013e-13
	CAGL0E05654g	0.860746	1.18007e-06
	CAGL0J02552g	0.860918	2.97339e-12
	CAGL0J03806g	0.861229	1.16317e-10
	CAGL0G09735g	0.86278	3.15565e-15
	CAGL0K01749g	0.862809	3.4701e-14
	CAGL0G07315g	0.862853	5.62533e-09
	CAGL0H07997g	0.863146	1.68026e-12
	CAGL0D02486g	0.865484	3.78205e-15
	CAGL0I05874g	0.865607	9.09172e-12
	CAGL0J04114g	0.866552	3.29343e-11
	CAGL0F07975g	0.866617	1.19548e-13
	CAGL0E02651g	0.866938	1.96655e-05
	CAGL0L10692g	0.869126	7.90037e-09
	CAGL0E04004g	0.870651	3.1592e-06
	CAGL0K04719g	0.872215	7.23038e-08
	CAGL0D05566g	0.873324	8.39546e-09
	CAGL0L03135g	0.873963	1.28354e-12
	CAGL0A01584g	0.875167	0.000292601
	CAGL0K09394g	0.87552	4.26893e-06
	CAGL0I07425g	0.876108	0.0426916
	CAGL0J07304g	0.877232	5.23489e-07
	CAGL0D01298g	0.882403	1.16877e-14
	CAGL0K05841g	0.883638	8.8248e-14
	CAGL0A04081g	0.884503	2.70575e-17
	CAGL0D06468g	0.884655	0.000399498
	CAGL0M07007g	0.885399	8.29616e-09
	CAGL0D02134g	0.8878	3.34099e-07
	CAGL0M13761g	0.889853	2.68384e-19
	CAGL0K00891g	0.891284	2.98226e-09
	CAGL0L08668g	0.891837	2.08204e-09
	CAGL0G02585g	0.891973	1.48013e-06
	CAGL0C00319g	0.892022	1.38273e-16
	CAGL0C02893g	0.892205	5.3683e-18
	CAGL0K09350g	0.896681	3.24234e-12
	CAGL0K09372g	0.896756	3.77079e-12
	CAGL0I00330g	0.900824	7.64596e-14
	CAGL0I05060g	0.902018	1.96594e-13
	CAGL0I04994g	0.90247	5.48429e-08
	CAGL0M09207g	0.903183	0.000719699
	CAGL0I10582g	0.903959	3.34297e-06
	CAGL0M02101g	0.904304	3.90303e-15
	CAGL0M03366g	0.905326	0.00566262
	CAGL0C05445g	0.907029	3.79322e-11
	CAGL0L10714g	0.908448	7.0737e-21
	CAGL0F07029g	0.908655	2.70633e-08
	CAGL0G05423g	0.912552	6.00788e-05
	CAGL0C04631g	0.913322	2.71828e-10
	CAGL0L04686g	0.917339	0.00235681
	CAGL0K00803g	0.918165	4.1241e-19
	CAGL0L11286g	0.919317	0.00125569
	CAGL0L08712g	0.919439	4.82959e-10
	CAGL0M09339g	0.921171	9.35393e-11
	CAGL0A04477g	0.926278	1.55771e-15
	CAGL0E00605g	0.928005	2.50452e-14
	CAGL0G03179g	0.929597	4.62676e-17
	CAGL0F04719g	0.930389	0.012019
	CAGL0B00968g	0.931423	0.00866141
	CAGL0E05610g	0.932139	0.0148853
	CAGL0H00418g	0.934459	2.01729e-11
	CAGL0M11660g	0.934953	3.08219e-11
	CAGL0M02167g	0.938529	7.94712e-12
	CAGL0J06908g	0.938929	1.2297e-09
	CAGL0L09273g	0.939493	0.000110263
	CAGL0F08085g	0.940488	1.686e-07
	CAGL0I09460g	0.942636	7.49836e-14
	CAGL0B01925g	0.943292	1.06209e-11
	CAGL0K11110g	0.944293	5.42289e-16
	CAGL0J07084g	0.946021	5.57373e-14
	CAGL0F04917g	0.950914	5.20535e-06
	CAGL0J09416g	0.958502	1.57072e-12
	CAGL0D05236g	0.95962	1.05089e-06
	CAGL0E05962g	0.960919	8.97693e-09
	CAGL0J03960g	0.962208	1.1781e-09
	CAGL0G05830g	0.962278	2.91851e-11
	CAGL0F01419g	0.963022	1.86521e-11
	CAGL0F03157g	0.963142	2.94436e-22
	CAGL0L02101g	0.963648	9.32344e-14
	CAGL0E06380g	0.96371	5.0421e-06
	CAGL0L07744g	0.965934	1.74937e-11
	CAGL0H10120g	0.965994	9.0944e-12
	CAGL0H06919g	0.966527	7.43909e-22
	CAGL0C04004g	0.966909	1.29574e-06
	CAGL0L06776g	0.968286	1.98821e-06
	CAGL0F05841g	0.970049	0.000356668
	CAGL0I06787g	0.970758	5.50724e-18
	CAGL0G02321g	0.97338	1.44515e-10
	CAGL0H04873g	0.973865	3.1467e-09
	CAGL0C04543g	0.975529	1.74016e-10
	CAGL0E03498g	0.976783	0.000111502
	CAGL0J09812g	0.97712	2.87329e-10
	CAGL0D05654g	0.97944	0.0251661
	CAGL0M13651g	0.97962	3.05703e-14
	CAGL0L03938g	0.981644	1.35405e-12
	CAGL0A01606g	0.982117	1.2391e-06
	CAGL0H10274g	0.991486	1.08511e-14
	CAGL0M01870g	0.99154	0.00010651
	CAGL0D04092g	0.992104	1.07323e-12
	CAGL0K12760g	0.99305	6.88529e-14
	CAGL0J04202g	0.996515	3.00421e-12
	CAGL0H01089g	0.998571	1.68283e-08
	CAGL0C05027g	0.999193	2.73195e-07
	CAGL0M11088g	1.00047	4.05856e-05
	CAGL0L07898g	1.00355	1.52559e-05
	CAGL0D00154g	1.00602	2.75717e-05
	CAGL0I09009g	1.00627	1.30272e-12
	CAGL0J10846g	1.00851	1.98921e-13
	CAGL0G04829g	1.00887	2.06354e-13
	CAGL0M05687g	1.00947	3.25924e-18
	CAGL0C00847g	1.01382	1.74929e-15
	CAGL0M09493g	1.01767	3.57079e-06
	CAGL0K04785g	1.01928	1.69608e-06
	CAGL0K06677g	1.02144	0.000210226
	CAGL0K10626g	1.02387	1.02262e-11
	CAGL0K08272g	1.02645	1.7785e-19
	CAGL0I08305g	1.03598	2.31503e-14
	CAGL0E00649g	1.0389	4.45703e-20
	CAGL0M08184g	1.04126	1.34341e-05
	CAGL0D03344g	1.04752	1.43105e-17
	CAGL0G07689g	1.05028	4.81926e-18
	CAGL0C04191g	1.05043	8.04377e-15
	CAGL0G05335g	1.05141	7.07227e-13
	CAGL0L03696g	1.05309	7.93777e-07
	CAGL0L06578g	1.05332	1.81654e-05
	CAGL0K04631g	1.055	6.78101e-10
	CAGL0H09460g	1.0594	4.87883e-07
	CAGL0A02233g	1.0689	6.07875e-18
	CAGL0H05005g	1.06915	4.70828e-21
	CAGL0C02739g	1.07068	2.16284e-12
	CAGL0E00583g	1.07099	7.95475e-11
	CAGL0L00803g	1.07226	6.20387e-11
	CAGL0B04367g	1.07446	2.39429e-14
	CAGL0M04103g	1.07545	8.73095e-10
	CAGL0L04664g	1.07706	1.40362e-19
	CAGL0L06006g	1.07801	4.35222e-19
	CAGL0L10208g	1.08174	5.93894e-19
	CAGL0G05357g	1.08251	3.13176e-11
	CAGL0G07601g	1.08262	4.02195e-25
	CAGL0G04455g	1.08935	0.0247326
	CAGL0L06974g	1.09507	1.9479e-19
	CAGL0J02904g	1.09749	2.72739e-14
	CAGL0L10582g	1.09796	1.61098e-15
	CAGL0B02563g	1.10173	3.67326e-12
	CAGL0A03410g	1.10359	0.00584293
	CAGL0K11638g	1.10426	0.00567345
	CAGL0C00946g	1.10776	0.000228024
	CAGL0K04169g	1.10857	4.14325e-16
	CAGL0A01870g	1.10995	8.55282e-18
	CAGL0B03311g	1.11625	1.98672e-11
	CAGL0M06105g	1.11763	5.45304e-18
	CAGL0I05934g	1.11944	1.2333e-06
	CAGL0B02904g	1.12089	0.00434005
	CAGL0L02079g	1.12328	7.07063e-09
	CAGL0A04675g	1.12596	5.19343e-06
	CAGL0F00869g	1.12737	3.17393e-09
	CAGL0G07188g	1.135	0.0234228
	CAGL0G09977g	1.13518	8.36873e-11
	CAGL0K01705g	1.13709	4.14735e-22
	CAGL0D03894g	1.14004	2.7294e-14
	CAGL0C04609g	1.14588	2.3627e-11
	CAGL0I04246g	1.15176	6.68126e-16
	CAGL0L10318g	1.15318	9.7109e-22
	CAGL0G01738g	1.15934	4.1114e-15
	CAGL0G00968g	1.16256	3.72737e-22
	CAGL0D06006g	1.16328	6.93746e-20
	CAGL0H02959g	1.16483	1.35481e-05
	CAGL0K12782g	1.16752	4.97261e-16
	CAGL0J03542g	1.17059	2.90589e-17
	CAGL0I10604g	1.17318	1.66097e-05
	CAGL0M06435g	1.17586	0.000217227
	CAGL0E01859g	1.17799	3.55299e-06
	CAGL0H00704g	1.19047	7.75098e-10
	CAGL0D00198g	1.19463	2.82159e-10
	CAGL0G08646g	1.19817	3.47546e-18
	CAGL0M02211g	1.20372	1.75218e-20
	CAGL0J10494g	1.20398	1.5064e-15
	CAGL0M13189g	1.20407	1.51232e-28
	CAGL0B03421g	1.21115	1.38559e-24
	CAGL0G08624g	1.21661	2.89158e-27
	CAGL0F06325g	1.21691	1.00953e-15
	CAGL0F08261g	1.21851	3.31889e-06
	CAGL0K09218g	1.21916	4.43099e-10
	CAGL0L06094g	1.22282	0.000477206
	CAGL0F04895g	1.22608	0.0011405
	CAGL0A03740g	1.22661	2.93242e-13
	CAGL0J04158g	1.22734	1.1723e-22
	CAGL0E00891g	1.2302	4.81518e-28
	CAGL0G02717g	1.23144	1.08233e-20
	CAGL0L05258g	1.23327	4.54088e-10
	CAGL0M03025g	1.23439	2.43152e-10
	CAGL0L06050g	1.24161	0.0285797
	CAGL0L13431g	1.24335	3.00032e-06
	CAGL0C00781g	1.24462	0.016348
	CAGL0I10098g	1.24848	5.38771e-21
	CAGL0L06072g	1.25322	2.73293e-05
	CAGL0E05588g	1.26541	1.61268e-21
	CAGL0H09944g	1.26642	2.30152e-20
	CAGL0J09262g	1.26895	3.86371e-13
	CAGL0H01661g	1.27536	0.011186
	CAGL0K04301g	1.27864	9.12557e-08
	CAGL0G02937g	1.27986	7.85178e-07
	CAGL0C04323g	1.28119	9.51088e-12
	CAGL0L09537g	1.28134	0.0032841
	CAGL0M07634g	1.28495	0.000101515
	CAGL0H09966g	1.28711	1.78223e-06
	CAGL0I04048g	1.28974	6.3093e-06
	CAGL0E00275g	1.29366	5.57956e-18
	CAGL0I04862g	1.29428	6.36952e-45
	CAGL0L12012g	1.29699	9.83433e-10
	CAGL0M09020g	1.30308	0.00148646
	CAGL0E03762g	1.31093	2.7612e-23
	CAGL0K03421g	1.31309	1.84043e-11
	CAGL0I10054g	1.32971	8.12659e-26
	CAGL0M11462g	1.32986	3.21506e-34
	CAGL0M03377g	1.32995	0.000174934
	CAGL0C00275g	1.33105	1.47772e-18
	CAGL0M04763g	1.33336	1.92392e-11
	CAGL0L09086g	1.33391	2.43154e-12
	CAGL0M13541g	1.33496	8.7582e-23
	CAGL0G07645g	1.33716	0.0368437
	CAGL0E00803g	1.33932	1.19385e-23
	CAGL0L00473g	1.3417	4.9054e-13
	CAGL0F03047g	1.34256	5.47308e-22
	CAGL0D01474g	1.35161	8.14309e-15
	CAGL0J08613g	1.35181	1.00421e-19
	CAGL0G06996g	1.35312	0.0341382
	CAGL0K08536g	1.35645	3.92445e-23
	CAGL0K12958g	1.36024	1.19893e-22
	CAGL0J01870g	1.36613	4.92461e-33
	CAGL0E01815g	1.37119	1.35074e-13
	CAGL0H10010g	1.37821	1.62609e-11
	CAGL0G05984g	1.38986	4.26907e-09
	CAGL0K08338g	1.39218	6.73574e-16
	CAGL0G05247g	1.39289	1.47313e-26
	CAGL0K03377g	1.39518	2.09125e-37
	CAGL0M03839g	1.39616	1.31462e-29
	CAGL0I08151g	1.39879	3.59142e-07
	CAGL0J09284g	1.40183	6.53578e-14
	CAGL0K12716g	1.41337	0.0018494
	CAGL0K04477g	1.41795	5.35462e-27
	CAGL0A04829g	1.42976	8.59908e-06
	CAGL0F08195g	1.43378	0.00785297
	CAGL0K11946g	1.43878	3.04257e-08
	CAGL0K07381g	1.4457	0.0104883
	CAGL0B02755g	1.44783	1.54757e-21
	CAGL0E01881g	1.45598	2.0291e-35
	CAGL0E01749g	1.46358	1.07734e-06
	CAGL0K10164g	1.46837	0.000125736
	CAGL0K03333g	1.47008	1.55142e-39
	CAGL0C00253g	1.47385	0.0372591
	CAGL0G04279g	1.47412	3.79457e-10
	CAGL0L01485g	1.47788	2.47804e-38
	CAGL0A00429g	1.48035	2.39555e-52
	CAGL0B03619g	1.4848	2.09814e-34
	CAGL0E04334g	1.48487	8.70914e-32
	CAGL0H04037g	1.48638	1.20774e-24
	CAGL0A01366g	1.4889	3.41251e-11
	CAGL0K05247g	1.49187	3.67325e-12
	CAGL0K10428g	1.49336	0.024034
	CAGL0G02849g	1.49437	3.22474e-13
	CAGL0H08888g	1.50121	3.33746e-27
	CAGL0J09944g	1.50916	0.000737836
	CAGL0M12474g	1.52581	2.33662e-15
	CAGL0J05852g	1.52689	2.6081e-34
	CAGL0B01595g	1.52959	6.05735e-10
	CAGL0D06600g	1.5338	1.35041e-35
	CAGL0F02101g	1.543	5.16247e-22
	CAGL0B03663g	1.5432	2.99466e-20
	CAGL0F07865g	1.55769	1.56804e-26
	CAGL0H06545g	1.57527	8.7611e-22
	CAGL0H03311g	1.57801	0.000688292
	CAGL0M01716g	1.58493	2.32907e-13
	CAGL0C02321g	1.58639	7.67807e-23
	CAGL0B02882g	1.60034	1.76932e-10
	CAGL0K12100g	1.60812	1.0081e-31
	CAGL0H03619g	1.61627	7.08103e-30
	CAGL0H07645g	1.63298	0.00159183
	CAGL0K01771g	1.63689	1.43878e-15
	CAGL0A01284g	1.64127	1.22947e-21
	CAGL0I08591g	1.65224	1.79301e-33
	CAGL0I02024g	1.66503	4.09249e-09
	CAGL0C02783g	1.66931	0.00411551
	CAGL0B04675g	1.68077	5.07643e-08
	CAGL0C03916g	1.70626	3.56109e-19
	CAGL0I00506g	1.71329	2.04577e-47
	CAGL0L10142g	1.71852	3.97978e-44
	CAGL0C02365g	1.72422	9.60616e-08
	CAGL0I06809g	1.73405	1.11844e-28
	CAGL0J01463g	1.75504	3.49214e-10
	CAGL0L05720g	1.76383	2.40899e-10
	CAGL0G05698g	1.76778	5.18501e-05
	CAGL0L00649g	1.76857	1.38217e-21
	CAGL0L04598g	1.77165	3.69775e-28
	CAGL0F08217g	1.77904	0.00256064
	CAGL0L01463g	1.79348	8.91345e-08
	CAGL0E01837g	1.79401	5.35938e-38
	CAGL0F07117g	1.79981	2.5076e-18
	CAGL0G01540g	1.81885	9.85598e-07
	CAGL0H07601g	1.8216	7.5623e-12
	CAGL0M10395g	1.82423	2.61869e-14
	CAGL0K00363g	1.82719	6.54549e-26
	CAGL0C05577g	1.83299	1.46306e-06
	CAGL0A02343g	1.83803	1.67188e-05
	CAGL0H08910g	1.84968	0.0349025
	CAGL0L02827g	1.85429	9.85021e-49
	CAGL0G06006g	1.86459	1.28658e-21
	CAGL0G03289g	1.88294	1.66083e-34
	CAGL0L11902g	1.88369	2.15648e-17
	CAGL0K03509g	1.9182	1.42752e-71
	CAGL0K09702g	1.93355	1.23641e-82
	CAGL0J01331g	1.95173	3.36493e-33
	CAGL0E06644g	1.95413	1.32605e-41
	CAGL0D06512g	1.95441	4.21135e-42
	CAGL0C04587g	1.96969	4.13866e-26
	CAGL0H08261g	1.97294	1.53225e-23
	CAGL0I04840g	1.98241	5.49539e-26
	CAGL0J05830g	1.98614	1.00308e-39
	CAGL0E05148g	1.99363	1.81459e-38
	CAGL0K03459g	1.99374	8.15738e-14
	CAGL0F01793g	2.00166	3.44592e-40
	CAGL0M03465g	2.00491	7.70315e-15
	CAGL0J05962g	2.01457	1.21699e-52
	CAGL0F02057g	2.022	0.00276561
	CAGL0H04851g	2.0258	5.99138e-41
	CAGL0B01012g	2.0367	1.77431e-14
	CAGL0D05104g	2.04487	1.18695e-06
	CAGL0K06380g	2.05409	1.71319e-11
	CAGL0L11990g	2.06734	1.21176e-11
	CAGL0D05082g	2.0675	2.73517e-65
	CAGL0J09020g	2.07298	7.45444e-48
	CAGL0K00170g	2.07903	2.4717e-26
	CAGL0D04026g	2.08189	6.46236e-22
	CAGL0J02706g	2.10255	1.70996e-06
	CAGL0B01078g	2.11215	2.53523e-52
	CAGL0I10010g	2.1325	2.06149e-21
	CAGL0M03003g	2.13703	1.52562e-27
	CAGL0F00605g	2.19102	3.32378e-07
	CAGL0M10153g	2.19156	0.000102112
	CAGL0D05940g	2.24217	7.06991e-64
	CAGL0H09262g	2.25209	1.33936e-10
	CAGL0M13365g	2.2812	1.73696e-23
	CAGL0J00451g	2.29382	0.0180298
	CAGL0H02387g	2.30081	8.7524e-11
	CAGL0M09735g	2.30336	8.31401e-68
	CAGL0A00341g	2.3367	3.4039e-11
	CAGL0I02046g	2.34177	5.82115e-56
	CAGL0L10186g	2.34493	3.36112e-80
	CAGL0G01122g	2.35419	2.33308e-49
	CAGL0K01727g	2.35774	1.35468e-109
	CAGL0J06402g	2.3778	8.68013e-09
	CAGL0L06512g	2.4009	6.95561e-12
	CAGL0A02145g	2.43844	5.71625e-08
	CAGL0D03608g	2.44366	2.44898e-19
	CAGL0F07777g	2.48027	2.20826e-38
	CAGL0K08668g	2.48118	0.00347676
	CAGL0I02596g	2.54218	0.00830076
	CAGL0A01650g	2.57302	7.42606e-103
	CAGL0B02926g	2.57382	0.00150858
	CAGL0M07744g	2.58413	6.47646e-18
	CAGL0B02079g	2.60055	8.53584e-08
	CAGL0A02002g	2.62355	4.87175e-15
	CAGL0G05544g	2.65321	3.96582e-11
	CAGL0E04554g	2.68052	4.05592e-51
	CAGL0H06039g	2.68286	1.08938e-25
	CAGL0D02662g	2.70083	0.0194762
	CAGL0H02563g	2.7114	1.27053e-09
	CAGL0I02134g	2.76595	2.93263e-12
	CAGL0J03916g	2.78863	1.59098e-104
	CAGL0D00946g	2.81205	1.89322e-32
	CAGL0H08844g	2.81754	4.56661e-91
	CAGL0H09922g	2.82575	3.27317e-05
	CAGL0I07249g	2.85688	1.34523e-38
	CAGL0D05918g	2.91802	1.96748e-204
	CAGL0M05401g	2.96616	4.04924e-12
	CAGL0I00286g	2.97315	5.67735e-77
	CAGL0A00451g	2.98992	1.55573e-225
	CAGL0H04257g	2.99196	0.0415957
	CAGL0M08426g	3.01171	9.46496e-123
	CAGL0I06050g	3.01475	5.4922e-80
	CAGL0K00715g	3.04936	1.51162e-104
	CAGL0H02101g	3.07996	4.36018e-47
	CAGL0G02563g	3.11485	2.38225e-12
	CAGL0D01694g	3.18484	0.000236926
	CAGL0A01089g	3.22711	2.07375e-149
	CAGL0H03575g	3.24088	2.06877e-88
	CAGL0C03289g	3.2818	1.67524e-197
	CAGL0M12551g	3.3307	1.04864e-27
	CAGL0M12815g	3.34167	1.7212e-11
	CAGL0M11902g	3.39536	2.3258e-17
	CAGL0B00715g	3.457	4.39632e-45
	CAGL0I05610g	3.46147	1.61516e-72
	CAGL0B00726g	3.48107	7.81869e-22
	CAGL0F00649g	3.52267	3.86818e-26
	CAGL0F01485g	3.54448	2.51698e-85
	CAGL0A01826g	3.55619	1.42433e-73
	CAGL0I08943g	3.59226	1.48713e-31
	CAGL0L05434g	3.63764	1.03583e-114
	CAGL0M02915g	3.65342	9.19429e-18
	CAGL0C00110g	3.6964	0.00543232
	CAGL0J04004g	3.84089	3.12705e-12
	CAGL0G06050g	3.86221	1.39905e-08
	CAGL0C03872g	3.86904	9.81109e-145
	CAGL0G00242g	3.91988	0
	CAGL0H07469g	3.97469	6.54746e-17
	CAGL0F08745g	4.0145	5.29365e-128
	CAGL0C05467g	4.05832	0.0329058
	CAGL0M01760g	4.16566	0
	CAGL0M11044g	4.17982	2.17993e-19
	CAGL0E03366g	4.20043	2.90975e-12
	CAGL0J03080g	4.35941	9.399e-63
	CAGL0K00110g	4.45376	0.0124388
	CAGL0H09592g	4.4871	6.62894e-51
	CAGL0D06380g	4.54819	6.96749e-06
	CAGL0M09713g	4.56496	0
	CAGL0D02640g	4.58158	0.000210152
	CAGL0L01045g	4.74637	0.0291705
	CAGL0G10197g	4.76481	0.0271317
	CAGL0E05984g	4.84806	7.04951e-57
	CAGL0K05687g	4.87922	2.25226e-37
	CAGL0H09614g	4.96716	1.10829e-76
	CAGL0F02717g	4.97698	0
	CAGL0M03421g	5.0465	0.00229974
	CAGL0J11550g	5.0687	1.00078e-90
	CAGL0L12100g	5.20854	0.0095916
	CAGL0G05269g	5.3037	1.62869e-37
	CAGL0G10219g	5.60996	0.00267345
	CAGL0L08547g	5.98726	7.11337e-45
	CAGL0F04631g	6.01951	2.30814e-17
	CAGL0H00110g	6.29201	9.68008e-05
	CAGL0E00231g	6.43182	0
	CAGL0M12947g	7.29058	0
	CAGL0M11000g	8.94914	2.10492e-09

## Sheet: GO_Up_genes_Cgxbp1∆
Supplementary file 12 - List of enriched GO terms from upregulated genes upon fluconazole treatment in CgXBP1∆ cells
S.no.	ID	Description	P-value	Number of genes in the background	Number of upregulated genes	Up-regulated genes
1	GO:0005975	carbohydrate metabolic process	0	215	59	CAGL0K05137g/CAGL0G09515g/CAGL0B02695g/CAGL0M04565g/CAGL0L02167g/CAGL0J07612g/CAGL0D01100g/CAGL0M03399g/CAGL0H02695g/CAGL0D06490g/CAGL0G09020g/CAGL0H08998g/CAGL0K01683g/CAGL0H06633g/CAGL0K12254g/CAGL0E01529g/CAGL0E05918g/CAGL0H10186g/CAGL0M10439g/CAGL0L09493g/CAGL0C01397g/CAGL0G09064g/CAGL0E05654g/CAGL0H07997g/CAGL0F04719g/CAGL0E05610g/CAGL0F04917g/CAGL0H10120g/CAGL0C04543g/CAGL0J09812g/CAGL0H010…
2	GO:0044262	cellular carbohydrate metabolic process	0	125	39	CAGL0K05137g/CAGL0B02695g/CAGL0M04565g/CAGL0L02167g/CAGL0M03399g/CAGL0H02695g/CAGL0G09020g/CAGL0H08998g/CAGL0K12254g/CAGL0E05918g/CAGL0H10186g/CAGL0M10439g/CAGL0G09064g/CAGL0E05654g/CAGL0H07997g/CAGL0F04719g/CAGL0F04917g/CAGL0H10120g/CAGL0J09812g/CAGL0H01089g/CAGL0K10626g/CAGL0G05335g/CAGL0L00803g/CAGL0J02904g/CAGL0G09977g/CAGL0F04895g/CAGL0G02717g/CAGL0C04323g/CAGL0K03421g/CAGL0I10054g/CAGL0M033…
3	GO:0006112	energy reserve metabolic process	0	35	17	CAGL0H02695g/CAGL0H08998g/CAGL0E05918g/CAGL0F04719g/CAGL0F04917g/CAGL0K10626g/CAGL0L00803g/CAGL0J02904g/CAGL0G09977g/CAGL0F04895g/CAGL0G02717g/CAGL0K03421g/CAGL0M03377g/CAGL0H04037g/CAGL0K10428g/CAGL0M12551g/CAGL0J03080g
4	GO:0000422	autophagy of mitochondrion	0	29	14	CAGL0H05841g/CAGL0I03652g/CAGL0M02343g/CAGL0K11682g/CAGL0J04686g/CAGL0H10428g/CAGL0J07304g/CAGL0C04631g/CAGL0E00649g/CAGL0L06006g/CAGL0A04675g/CAGL0H00704g/CAGL0H06545g/CAGL0H08261g
5	GO:0005977	glycogen metabolic process	0	33	15	CAGL0H02695g/CAGL0H08998g/CAGL0E05918g/CAGL0F04719g/CAGL0F04917g/CAGL0K10626g/CAGL0L00803g/CAGL0J02904g/CAGL0G09977g/CAGL0F04895g/CAGL0G02717g/CAGL0K03421g/CAGL0M03377g/CAGL0H04037g/CAGL0K10428g
6	GO:0006508	proteolysis	0	308	69	CAGL0I05478g/CAGL0G07623g/CAGL0F07821g/CAGL0L09933g/CAGL0K11341g/CAGL0M05665g/CAGL0I05830g/CAGL0H04103g/CAGL0B02695g/CAGL0G05676g/CAGL0I09482g/CAGL0H09548g/CAGL0M12859g/CAGL0K02761g/CAGL0D06292g/CAGL0M01320g/CAGL0L04312g/CAGL0G07293g/CAGL0M03399g/CAGL0L01947g/CAGL0J09350g/CAGL0F01199g/CAGL0J07414g/CAGL0K10494g/CAGL0J07282g/CAGL0M13783g/CAGL0J08096g/CAGL0M07403g/CAGL0F07799g/CAGL0H07315g/CAGL0K122…
7	GO:0030163	protein catabolic process	0	224	54	CAGL0I05478g/CAGL0G07623g/CAGL0F07821g/CAGL0L09933g/CAGL0I05830g/CAGL0H04103g/CAGL0B02695g/CAGL0I09482g/CAGL0H09548g/CAGL0M12859g/CAGL0K02761g/CAGL0D06292g/CAGL0M01320g/CAGL0L04312g/CAGL0G07293g/CAGL0M03399g/CAGL0L01947g/CAGL0J09350g/CAGL0F01199g/CAGL0A02750g/CAGL0J07414g/CAGL0K10494g/CAGL0J07282g/CAGL0M13783g/CAGL0J08096g/CAGL0M07403g/CAGL0F07799g/CAGL0H07315g/CAGL0K12254g/CAGL0H09416g/CAGL0H047…
8	GO:0051603	proteolysis involved in cellular protein catabolic process	0	206	49	CAGL0I05478g/CAGL0F07821g/CAGL0L09933g/CAGL0I05830g/CAGL0H04103g/CAGL0B02695g/CAGL0I09482g/CAGL0H09548g/CAGL0M12859g/CAGL0K02761g/CAGL0D06292g/CAGL0M01320g/CAGL0L04312g/CAGL0G07293g/CAGL0M03399g/CAGL0L01947g/CAGL0J09350g/CAGL0F01199g/CAGL0J07414g/CAGL0K10494g/CAGL0J07282g/CAGL0M13783g/CAGL0J08096g/CAGL0M07403g/CAGL0F07799g/CAGL0H07315g/CAGL0K12254g/CAGL0H04785g/CAGL0H10186g/CAGL0J05874g/CAGL0G049…
9	GO:0006066	alcohol metabolic process	0	91	27	CAGL0M07656g/CAGL0G05676g/CAGL0H03663g/CAGL0J02684g/CAGL0A01177g/CAGL0M14047g/CAGL0B03465g/CAGL0J01441g/CAGL0I02970g/CAGL0G09064g/CAGL0E05654g/CAGL0L10714g/CAGL0H01089g/CAGL0C05027g/CAGL0I08305g/CAGL0D00198g/CAGL0G02937g/CAGL0K04477g/CAGL0A00429g/CAGL0E04334g/CAGL0F07865g/CAGL0F01793g/CAGL0D05940g/CAGL0B02079g/CAGL0D05918g/CAGL0I06050g/CAGL0A01089g
10	GO:0005978	glycogen biosynthetic process	0.0001	19	10	CAGL0H02695g/CAGL0H08998g/CAGL0E05918g/CAGL0F04719g/CAGL0F04917g/CAGL0K10626g/CAGL0L00803g/CAGL0G09977g/CAGL0K03421g/CAGL0M03377g
11	GO:0030435	sporulation resulting in formation of a cellular spore	0.0001	150	37	CAGL0E01177g/CAGL0K02585g/CAGL0G09515g/CAGL0I05830g/CAGL0I09482g/CAGL0J07436g/CAGL0K02761g/CAGL0E03630g/CAGL0M04565g/CAGL0D01782g/CAGL0K02101g/CAGL0H01639g/CAGL0D06490g/CAGL0G09020g/CAGL0M10439g/CAGL0L07480g/CAGL0M01452g/CAGL0F01859g/CAGL0L03135g/CAGL0L11286g/CAGL0J09812g/CAGL0L06578g/CAGL0L06006g/CAGL0F00869g/CAGL0G08624g/CAGL0H01661g/CAGL0M07634g/CAGL0E03762g/CAGL0G05984g/CAGL0K03333g/CAGL0B036…
12	GO:0016125	sterol metabolic process	0.0002	41	15	CAGL0M07656g/CAGL0G05676g/CAGL0J07436g/CAGL0J02684g/CAGL0C02981g/CAGL0I02970g/CAGL0D05566g/CAGL0L10714g/CAGL0K04477g/CAGL0A00429g/CAGL0E04334g/CAGL0F07865g/CAGL0F01793g/CAGL0D05940g/CAGL0D05918g
13	GO:0055114	oxidation-reduction process	0.0002	186	43	CAGL0M07656g/CAGL0D05280g/CAGL0G01903g/CAGL0M07612g/CAGL0H03663g/CAGL0M14025g/CAGL0J07612g/CAGL0G00946g/CAGL0M14047g/CAGL0K01683g/CAGL0D03982g/CAGL0H09504g/CAGL0K02629g/CAGL0J08481g/CAGL0J01441g/CAGL0H06853g/CAGL0L01177g/CAGL0G02585g/CAGL0F07029g/CAGL0J07084g/CAGL0H06919g/CAGL0C04543g/CAGL0K06677g/CAGL0C04191g/CAGL0D00198g/CAGL0A03740g/CAGL0L05258g/CAGL0H09944g/CAGL0L09537g/CAGL0K12958g/CAGL0K044…
14	GO:0042631	cellular response to water deprivation	0.0002	6	5	CAGL0K05137g/CAGL0M10439g/CAGL0J09812g/CAGL0I05934g/CAGL0F08745g
15	GO:0016052	carbohydrate catabolic process	0.0003	56	18	CAGL0K05137g/CAGL0M04565g/CAGL0G09020g/CAGL0E01529g/CAGL0M10439g/CAGL0E05610g/CAGL0C04543g/CAGL0G09977g/CAGL0K01705g/CAGL0F08261g/CAGL0F04895g/CAGL0G02717g/CAGL0C04323g/CAGL0K03421g/CAGL0A04829g/CAGL0K10428g/CAGL0E05148g/CAGL0B00726g
16	GO:0006511	ubiquitin-dependent protein catabolic process	0.0003	188	43	CAGL0I05478g/CAGL0F07821g/CAGL0L09933g/CAGL0I05830g/CAGL0H04103g/CAGL0B02695g/CAGL0I09482g/CAGL0H09548g/CAGL0M12859g/CAGL0K02761g/CAGL0D06292g/CAGL0M01320g/CAGL0L04312g/CAGL0G07293g/CAGL0M03399g/CAGL0L01947g/CAGL0J09350g/CAGL0F01199g/CAGL0J07414g/CAGL0K10494g/CAGL0J07282g/CAGL0M13783g/CAGL0J08096g/CAGL0F07799g/CAGL0H07315g/CAGL0K12254g/CAGL0H04785g/CAGL0H10186g/CAGL0J05874g/CAGL0G04939g/CAGL0A044…
17	GO:0042908	xenobiotic transport	0.0003	12	7	CAGL0G08624g/CAGL0I04862g/CAGL0J09944g/CAGL0H06039g/CAGL0G00242g/CAGL0M01760g/CAGL0F02717g
18	GO:0000103	sulfate assimilation	0.0008	10	6	CAGL0D05280g/CAGL0L02321g/CAGL0G01903g/CAGL0B03839g/CAGL0K00803g/CAGL0K06677g
19	GO:0016126	sterol biosynthetic process	0.0008	33	12	CAGL0M07656g/CAGL0G05676g/CAGL0J07436g/CAGL0J02684g/CAGL0I02970g/CAGL0L10714g/CAGL0K04477g/CAGL0A00429g/CAGL0E04334g/CAGL0F07865g/CAGL0F01793g/CAGL0D05940g
20	GO:0006696	ergosterol biosynthetic process	0.0009	29	11	CAGL0M07656g/CAGL0G05676g/CAGL0J02684g/CAGL0I02970g/CAGL0L10714g/CAGL0K04477g/CAGL0A00429g/CAGL0E04334g/CAGL0F07865g/CAGL0F01793g/CAGL0D05940g
21	GO:0043935	sexual sporulation resulting in formation of a cellular spore	0.0011	126	30	CAGL0E01177g/CAGL0K02585g/CAGL0G09515g/CAGL0I05830g/CAGL0J07436g/CAGL0K02761g/CAGL0M04565g/CAGL0D01782g/CAGL0K02101g/CAGL0H01639g/CAGL0D06490g/CAGL0M10439g/CAGL0F01859g/CAGL0L03135g/CAGL0L11286g/CAGL0J09812g/CAGL0L06578g/CAGL0L06006g/CAGL0F00869g/CAGL0G08624g/CAGL0H01661g/CAGL0E03762g/CAGL0G05984g/CAGL0K03333g/CAGL0C05577g/CAGL0I04840g/CAGL0M13365g/CAGL0H09922g/CAGL0D01694g/CAGL0H03575g
22	GO:0008204	ergosterol metabolic process	0.0012	30	11	CAGL0M07656g/CAGL0G05676g/CAGL0J02684g/CAGL0I02970g/CAGL0L10714g/CAGL0K04477g/CAGL0A00429g/CAGL0E04334g/CAGL0F07865g/CAGL0F01793g/CAGL0D05940g
23	GO:0009311	oligosaccharide metabolic process	0.0013	26	10	CAGL0K05137g/CAGL0G09020g/CAGL0M10439g/CAGL0J09812g/CAGL0G05335g/CAGL0L10582g/CAGL0C04323g/CAGL0K03421g/CAGL0E05148g/CAGL0H02387g
24	GO:0005991	trehalose metabolic process	0.0013	18	8	CAGL0K05137g/CAGL0G09020g/CAGL0M10439g/CAGL0J09812g/CAGL0G05335g/CAGL0C04323g/CAGL0K03421g/CAGL0H02387g
25	GO:0006694	steroid biosynthetic process	0.0015	35	12	CAGL0M07656g/CAGL0G05676g/CAGL0J07436g/CAGL0J02684g/CAGL0I02970g/CAGL0L10714g/CAGL0K04477g/CAGL0A00429g/CAGL0E04334g/CAGL0F07865g/CAGL0F01793g/CAGL0D05940g
26	GO:0034727	piecemeal microautophagy of the nucleus	0.0015	35	12	CAGL0H05841g/CAGL0J09350g/CAGL0I03652g/CAGL0M02343g/CAGL0K11682g/CAGL0J04686g/CAGL0K01749g/CAGL0J07304g/CAGL0L06006g/CAGL0A04675g/CAGL0J03542g/CAGL0J03916g
27	GO:0008645	hexose transmembrane transport	0.0015	11	6	CAGL0I05390g/CAGL0M04103g/CAGL0A04829g/CAGL0J09020g/CAGL0B00726g/CAGL0A01826g
28	GO:0055085	transmembrane transport	0.0017	302	59	CAGL0L12342g/CAGL0E06006g/CAGL0M04147g/CAGL0M09647g/CAGL0D03036g/CAGL0A00517g/CAGL0I05390g/CAGL0L02519g/CAGL0K01683g/CAGL0L06402g/CAGL0H09416g/CAGL0I09086g/CAGL0D00352g/CAGL0L12276g/CAGL0C01771g/CAGL0I03872g/CAGL0B04455g/CAGL0I10450g/CAGL0L03267g/CAGL0K11616g/CAGL0J04114g/CAGL0E04004g/CAGL0G03179g/CAGL0F08085g/CAGL0F01419g/CAGL0D00154g/CAGL0L03696g/CAGL0A02233g/CAGL0M04103g/CAGL0G07601g/CAGL0L020…
29	GO:0016237	lysosomal microautophagy	0.0021	41	13	CAGL0H05841g/CAGL0J09350g/CAGL0I03652g/CAGL0M02343g/CAGL0K11682g/CAGL0J04686g/CAGL0K01749g/CAGL0J07304g/CAGL0L06006g/CAGL0A04675g/CAGL0J03542g/CAGL0M02211g/CAGL0J03916g
30	GO:0030437	ascospore formation	0.0021	114	27	CAGL0E01177g/CAGL0K02585g/CAGL0G09515g/CAGL0I05830g/CAGL0K02761g/CAGL0D01782g/CAGL0K02101g/CAGL0H01639g/CAGL0D06490g/CAGL0M10439g/CAGL0F01859g/CAGL0L03135g/CAGL0L11286g/CAGL0J09812g/CAGL0L06578g/CAGL0L06006g/CAGL0F00869g/CAGL0G08624g/CAGL0H01661g/CAGL0E03762g/CAGL0G05984g/CAGL0C05577g/CAGL0I04840g/CAGL0M13365g/CAGL0H09922g/CAGL0D01694g/CAGL0H03575g
31	GO:0070726	cell wall assembly	0.0034	48	14	CAGL0J06050g/CAGL0H01639g/CAGL0D06490g/CAGL0F01859g/CAGL0L06578g/CAGL0F00869g/CAGL0G08624g/CAGL0H01661g/CAGL0G05984g/CAGL0C05577g/CAGL0I04840g/CAGL0M13365g/CAGL0H09922g/CAGL0D01694g
32	GO:0009395	phospholipid catabolic process	0.0035	9	5	CAGL0J11770g/CAGL0A01177g/CAGL0E05654g/CAGL0J03542g/CAGL0H03575g
33	GO:1904659	glucose transmembrane transport	0.0035	9	5	CAGL0I05390g/CAGL0A04829g/CAGL0J09020g/CAGL0B00726g/CAGL0A01826g
34	GO:0005980	glycogen catabolic process	0.004	6	4	CAGL0G09977g/CAGL0F04895g/CAGL0G02717g/CAGL0K10428g
35	GO:0071243	cellular response to arsenic-containing substance	0.004	6	4	CAGL0M13189g/CAGL0J05962g/CAGL0L10186g/CAGL0K01727g
36	GO:0048869	cellular developmental process	0.0045	221	44	CAGL0E01177g/CAGL0K02585g/CAGL0E01331g/CAGL0G09515g/CAGL0I05830g/CAGL0I09482g/CAGL0J07436g/CAGL0K02761g/CAGL0E03630g/CAGL0M04565g/CAGL0D01782g/CAGL0K02101g/CAGL0H01639g/CAGL0D06490g/CAGL0G09020g/CAGL0K03443g/CAGL0G03047g/CAGL0M04125g/CAGL0M10439g/CAGL0L07480g/CAGL0M01452g/CAGL0F01859g/CAGL0L03135g/CAGL0M09207g/CAGL0L11286g/CAGL0B00968g/CAGL0J09812g/CAGL0E00649g/CAGL0L06578g/CAGL0L06006g/CAGL0F008…
37	GO:0044805	late nucleophagy	0.0046	17	7	CAGL0I03652g/CAGL0M02343g/CAGL0K11682g/CAGL0J04686g/CAGL0J07304g/CAGL0L06006g/CAGL0A04675g
38	GO:0000096	sulfur amino acid metabolic process	0.0049	35	11	CAGL0L02321g/CAGL0G01903g/CAGL0M03971g/CAGL0B03839g/CAGL0M00550g/CAGL0D06402g/CAGL0I04994g/CAGL0F07029g/CAGL0K00803g/CAGL0L06094g/CAGL0K08668g
39	GO:0030476	ascospore wall assembly	0.0052	45	13	CAGL0H01639g/CAGL0D06490g/CAGL0F01859g/CAGL0L06578g/CAGL0F00869g/CAGL0G08624g/CAGL0H01661g/CAGL0G05984g/CAGL0C05577g/CAGL0I04840g/CAGL0M13365g/CAGL0H09922g/CAGL0D01694g
40	GO:0071940	fungal-type cell wall assembly	0.0077	47	13	CAGL0H01639g/CAGL0D06490g/CAGL0F01859g/CAGL0L06578g/CAGL0F00869g/CAGL0G08624g/CAGL0H01661g/CAGL0G05984g/CAGL0C05577g/CAGL0I04840g/CAGL0M13365g/CAGL0H09922g/CAGL0D01694g
41	GO:0005992	trehalose biosynthetic process	0.0083	7	4	CAGL0J09812g/CAGL0G05335g/CAGL0K03421g/CAGL0H02387g
42	GO:0006000	fructose metabolic process	0.0083	7	4	CAGL0D01100g/CAGL0E01529g/CAGL0C01397g/CAGL0A04829g
43	GO:0006006	glucose metabolic process	0.0095	33	10	CAGL0B02695g/CAGL0J07612g/CAGL0M03399g/CAGL0H06633g/CAGL0K12254g/CAGL0H10186g/CAGL0E05610g/CAGL0A04829g/CAGL0J00451g/CAGL0B00726g
44	GO:0051321	meiotic cell cycle	0.0099	294	54	CAGL0E01177g/CAGL0K02585g/CAGL0G09515g/CAGL0I05830g/CAGL0J07436g/CAGL0K02761g/CAGL0E03630g/CAGL0M04565g/CAGL0D01782g/CAGL0K02101g/CAGL0K12540g/CAGL0H01639g/CAGL0D06490g/CAGL0G09020g/CAGL0I05390g/CAGL0I04224g/CAGL0M10439g/CAGL0J08481g/CAGL0F01859g/CAGL0J03806g/CAGL0L03135g/CAGL0I07425g/CAGL0L11286g/CAGL0J03960g/CAGL0J09812g/CAGL0A01606g/CAGL0L06578g/CAGL0L06006g/CAGL0G04455g/CAGL0B02563g/CAGL0F008…
45	GO:0031321	ascospore-type prospore assembly	0.0108	24	8	CAGL0I05830g/CAGL0K02761g/CAGL0H01639g/CAGL0L03135g/CAGL0L11286g/CAGL0C05577g/CAGL0M13365g/CAGL0H03575g
46	GO:0007033	vacuole organization	0.0121	88	20	CAGL0H05841g/CAGL0M05665g/CAGL0G01342g/CAGL0C05489g/CAGL0G04697g/CAGL0I03652g/CAGL0L06402g/CAGL0J04686g/CAGL0M01452g/CAGL0G09735g/CAGL0J07304g/CAGL0K00803g/CAGL0E00649g/CAGL0L06006g/CAGL0A04675g/CAGL0G00968g/CAGL0H00704g/CAGL0F08261g/CAGL0B03619g/CAGL0G06006g
47	GO:0000271	polysaccharide biosynthetic process	0.0133	50	13	CAGL0H02695g/CAGL0H08998g/CAGL0E05918g/CAGL0H07997g/CAGL0F04719g/CAGL0F04917g/CAGL0K10626g/CAGL0L00803g/CAGL0G09977g/CAGL0K03421g/CAGL0I10054g/CAGL0M03377g/CAGL0I07249g
48	GO:0010498	proteasomal protein catabolic process	0.0136	130	27	CAGL0I05478g/CAGL0F07821g/CAGL0H04103g/CAGL0B02695g/CAGL0H09548g/CAGL0D06292g/CAGL0M01320g/CAGL0L04312g/CAGL0G07293g/CAGL0M03399g/CAGL0L01947g/CAGL0J09350g/CAGL0F01199g/CAGL0K10494g/CAGL0M07403g/CAGL0H07315g/CAGL0K12254g/CAGL0H04785g/CAGL0H10186g/CAGL0J05874g/CAGL0G04939g/CAGL0D03344g/CAGL0L06578g/CAGL0B03311g/CAGL0M06105g/CAGL0F02101g/CAGL0J05962g
49	GO:0006109	regulation of carbohydrate metabolic process	0.0139	45	12	CAGL0B02695g/CAGL0M03399g/CAGL0H08998g/CAGL0K12254g/CAGL0E01529g/CAGL0E05918g/CAGL0H10186g/CAGL0F04917g/CAGL0L00803g/CAGL0F03047g/CAGL0K10428g/CAGL0I07249g
50	GO:0006536	glutamate metabolic process	0.0156	12	5	CAGL0D03982g/CAGL0H02585g/CAGL0C04191g/CAGL0G05698g/CAGL0D04026g
51	GO:0007129	synapsis	0.0168	21	7	CAGL0I07425g/CAGL0A01606g/CAGL0L06578g/CAGL0H07645g/CAGL0H07601g/CAGL0M12815g/CAGL0L12100g
52	GO:0009062	fatty acid catabolic process	0.0168	21	7	CAGL0L02167g/CAGL0H03663g/CAGL0F05071g/CAGL0L09273g/CAGL0A03740g/CAGL0M09020g/CAGL0L09086g
53	GO:0006003	fructose 2,6-bisphosphate metabolic process	0.0199	5	3	CAGL0D01100g/CAGL0E01529g/CAGL0C01397g
54	GO:0006013	mannose metabolic process	0.0199	5	3	CAGL0A04829g/CAGL0E05148g/CAGL0B00726g
55	GO:0007039	protein catabolic process in the vacuole	0.0199	5	3	CAGL0G07623g/CAGL0K12254g/CAGL0B03619g
56	GO:0010674	negative regulation of transcription from RNA polymerase II promoter involved in meiotic cell cycle	0.0199	5	3	CAGL0K12540g/CAGL0J03806g/CAGL0J03960g
57	GO:0042174	negative regulation of sporulation resulting in formation of a cellular spore	0.0199	5	3	CAGL0J07436g/CAGL0D01782g/CAGL0D01694g
58	GO:0072671	mitochondria-associated ubiquitin-dependent protein catabolic process	0.0199	5	3	CAGL0J09350g/CAGL0K10494g/CAGL0M06105g
59	GO:0044550	secondary metabolite biosynthetic process	0.0218	22	7	CAGL0K02585g/CAGL0G09020g/CAGL0M09207g/CAGL0M13651g/CAGL0J05852g/CAGL0B02079g/CAGL0G00242g
60	GO:0043666	regulation of phosphoprotein phosphatase activity	0.0225	13	5	CAGL0G06094g/CAGL0K05423g/CAGL0M13937g/CAGL0J04202g/CAGL0H09922g
61	GO:0005993	trehalose catabolic process	0.0238	9	4	CAGL0K05137g/CAGL0G09020g/CAGL0M10439g/CAGL0C04323g
62	GO:0006855	drug transmembrane transport	0.0238	9	4	CAGL0G08624g/CAGL0J09944g/CAGL0H06039g/CAGL0M01760g
63	GO:0044409	entry into host	0.0238	9	4	CAGL0G09020g/CAGL0F08261g/CAGL0M07634g/CAGL0E03762g
64	GO:0045721	negative regulation of gluconeogenesis	0.0238	9	4	CAGL0B02695g/CAGL0M03399g/CAGL0K12254g/CAGL0H10186g
65	GO:0070651	nonfunctional rRNA decay	0.0238	9	4	CAGL0D06292g/CAGL0J09350g/CAGL0M06105g/CAGL0B04675g
66	GO:0071629	cytoplasm protein quality control by the ubiquitin-proteasome system	0.0238	9	4	CAGL0J09350g/CAGL0H07315g/CAGL0D03344g/CAGL0M06105g
67	GO:0006869	lipid transport	0.0249	54	13	CAGL0K01353g/CAGL0G07667g/CAGL0J07436g/CAGL0K07458g/CAGL0D00352g/CAGL0C03509g/CAGL0K01749g/CAGL0F01419g/CAGL0H05005g/CAGL0L10142g/CAGL0J03916g/CAGL0C03289g/CAGL0C03872g
68	GO:0043161	proteasome-mediated ubiquitin-dependent protein catabolic process	0.0266	125	25	CAGL0I05478g/CAGL0F07821g/CAGL0H04103g/CAGL0B02695g/CAGL0H09548g/CAGL0D06292g/CAGL0M01320g/CAGL0L04312g/CAGL0G07293g/CAGL0M03399g/CAGL0L01947g/CAGL0J09350g/CAGL0F01199g/CAGL0K10494g/CAGL0H07315g/CAGL0K12254g/CAGL0H04785g/CAGL0H10186g/CAGL0J05874g/CAGL0G04939g/CAGL0D03344g/CAGL0L06578g/CAGL0B03311g/CAGL0M06105g/CAGL0J05962g
69	GO:0006629	lipid metabolic process	0.0301	299	52	CAGL0H04543g/CAGL0M07656g/CAGL0E02981g/CAGL0G05676g/CAGL0J11770g/CAGL0J07436g/CAGL0L02167g/CAGL0H03663g/CAGL0G01342g/CAGL0J02684g/CAGL0A01177g/CAGL0M10219g/CAGL0K07458g/CAGL0F05071g/CAGL0M13981g/CAGL0M06347g/CAGL0L07480g/CAGL0C05533g/CAGL0C02981g/CAGL0L09493g/CAGL0I02970g/CAGL0E05654g/CAGL0D05566g/CAGL0L03135g/CAGL0I00330g/CAGL0L10714g/CAGL0L04686g/CAGL0L09273g/CAGL0H01089g/CAGL0K08272g/CAGL0H094…
70	GO:0006783	heme biosynthetic process	0.0313	14	5	CAGL0G01903g/CAGL0H09504g/CAGL0K06677g/CAGL0L04664g/CAGL0K12100g
71	GO:0009313	oligosaccharide catabolic process	0.0313	14	5	CAGL0K05137g/CAGL0G09020g/CAGL0M10439g/CAGL0C04323g/CAGL0E05148g
72	GO:0070873	regulation of glycogen metabolic process	0.0313	14	5	CAGL0H08998g/CAGL0E05918g/CAGL0F04917g/CAGL0L00803g/CAGL0K10428g
73	GO:0015918	sterol transport	0.0343	19	6	CAGL0K01353g/CAGL0G07667g/CAGL0K01749g/CAGL0F01419g/CAGL0J03916g/CAGL0C03872g
74	GO:0046148	pigment biosynthetic process	0.0343	19	6	CAGL0G01903g/CAGL0H09504g/CAGL0K06677g/CAGL0L04664g/CAGL0K12100g/CAGL0K03509g
75	GO:0000045	autophagosome assembly	0.0349	24	7	CAGL0H05841g/CAGL0I03652g/CAGL0J04686g/CAGL0J07304g/CAGL0L06006g/CAGL0A04675g/CAGL0H00704g
76	GO:0006067	ethanol metabolic process	0.0359	6	3	CAGL0B03465g/CAGL0J01441g/CAGL0G02937g
77	GO:0031579	membrane raft organization	0.0359	6	3	CAGL0K03487g/CAGL0G08624g/CAGL0E04334g
78	GO:0061709	reticulophagy	0.0359	6	3	CAGL0I03652g/CAGL0L06006g/CAGL0A04675g
79	GO:0006779	porphyrin-containing compound biosynthetic process	0.0418	15	5	CAGL0G01903g/CAGL0H09504g/CAGL0K06677g/CAGL0L04664g/CAGL0K12100g
80	GO:0007009	plasma membrane organization	0.0418	15	5	CAGL0K03487g/CAGL0M10219g/CAGL0J08371g/CAGL0J04202g/CAGL0H02563g
81	GO:0033014	tetrapyrrole biosynthetic process	0.0418	15	5	CAGL0G01903g/CAGL0H09504g/CAGL0K06677g/CAGL0L04664g/CAGL0K12100g
82	GO:0046173	polyol biosynthetic process	0.0418	15	5	CAGL0A01177g/CAGL0G09064g/CAGL0D00198g/CAGL0B02079g/CAGL0I06050g
83	GO:0016579	protein deubiquitination	0.043	25	7	CAGL0K10494g/CAGL0M13783g/CAGL0H10186g/CAGL0A04477g/CAGL0K12782g/CAGL0G05247g/CAGL0G02563g
84	GO:1905037	autophagosome organization	0.043	25	7	CAGL0H05841g/CAGL0I03652g/CAGL0J04686g/CAGL0J07304g/CAGL0L06006g/CAGL0A04675g/CAGL0H00704g
85	GO:0051701	interaction with host	0.0471	53	12	CAGL0G09020g/CAGL0M01452g/CAGL0I04994g/CAGL0F08261g/CAGL0I10098g/CAGL0M07634g/CAGL0E03762g/CAGL0A04829g/CAGL0M01716g/CAGL0G03289g/CAGL0E06644g/CAGL0C00110g
86	GO:0005979	regulation of glycogen biosynthetic process	0.05	11	4	CAGL0H08998g/CAGL0E05918g/CAGL0F04917g/CAGL0L00803g
87	GO:0006734	NADH metabolic process	0.05	11	4	CAGL0K01683g/CAGL0J01441g/CAGL0E05610g/CAGL0M05687g
88	GO:0010992	ubiquitin recycling	0.05	11	4	CAGL0F07821g/CAGL0M13783g/CAGL0A04477g/CAGL0G05247g
89	GO:0036187	cell growth mode switching, budding to filamentous	0.05	11	4	CAGL0K03487g/CAGL0M07634g/CAGL0E04334g/CAGL0D05940g
90	GO:0046685	response to arsenic-containing substance	0.05	11	4	CAGL0M13189g/CAGL0J05962g/CAGL0L10186g/CAGL0K01727g
91	GO:0001678	cellular glucose homeostasis	0.0542	21	6	CAGL0G09020g/CAGL0J07282g/CAGL0I03872g/CAGL0A04829g/CAGL0J09020g/CAGL0F00605g
92	GO:0046777	protein autophosphorylation	0.0542	21	6	CAGL0K07458g/CAGL0C03509g/CAGL0B01925g/CAGL0L06006g/CAGL0D06600g/CAGL0D01694g
93	GO:0032120	ascospore-type prospore membrane assembly	0.0543	16	5	CAGL0H01639g/CAGL0L11286g/CAGL0C05577g/CAGL0M13365g/CAGL0H03575g
94	GO:0000338	protein deneddylation	0.0566	7	3	CAGL0G05676g/CAGL0F05841g/CAGL0C04609g
95	GO:0006113	fermentation	0.0566	7	3	CAGL0L00649g/CAGL0J09020g/CAGL0D05918g
96	GO:0034629	cellular protein-containing complex localization	0.0566	7	3	CAGL0M09108g/CAGL0J03960g/CAGL0A04675g
97	GO:0035103	sterol regulatory element binding protein cleavage	0.0566	7	3	CAGL0L01947g/CAGL0J09350g/CAGL0J08096g
98	GO:0051038	negative regulation of transcription involved in meiotic cell cycle	0.0566	7	3	CAGL0K12540g/CAGL0J03806g/CAGL0J03960g
99	GO:0070682	proteasome regulatory particle assembly	0.0566	7	3	CAGL0D06292g/CAGL0H10362g/CAGL0I09460g
100	GO:0045143	homologous chromosome segregation	0.0582	32	8	CAGL0I07425g/CAGL0A01606g/CAGL0L06578g/CAGL0H07645g/CAGL0C02783g/CAGL0H07601g/CAGL0M12815g/CAGL0L12100g

## Sheet: GO_Down_genes_Cgxbp1∆
Supplementary file 12 - List of enriched GO terms from down-regulated genes upon fluconazole treatment in CgXBP1∆ cells
S.no.	ID	Description	P-value	Number of genes in the background	Number of upregulated genes	Down-regulated genes
1	GO:0042254	ribosome biogenesis	0	287	143	CAGL0K06061g/CAGL0I03234g/CAGL0K03135g/CAGL0J09086g/CAGL0M00946g/CAGL0J03234g/CAGL0L10890g/CAGL0K08382g/CAGL0M06303g/CAGL0G07227g/CAGL0L08118g/CAGL0L04510g/CAGL0J10802g/CAGL0G08173g/CAGL0A01540g/CAGL0G06490g/CAGL0M06501g/CAGL0G00154g/CAGL0B00352g/CAGL0L03806g/CAGL0I09790g/CAGL0G08041g/CAGL0G05742g/CAGL0G02475g/CAGL0I07975g/CAGL0F07073g/CAGL0I00792g/CAGL0L07678g/CAGL0M08118g/CAGL0K06149g/CAGL0H033…
2	GO:0006364	rRNA processing	0	198	101	CAGL0K06061g/CAGL0I03234g/CAGL0K03135g/CAGL0J09086g/CAGL0M00946g/CAGL0J03234g/CAGL0K08382g/CAGL0M06303g/CAGL0G07227g/CAGL0L08118g/CAGL0L04510g/CAGL0J10802g/CAGL0G08173g/CAGL0A01540g/CAGL0M06501g/CAGL0G00154g/CAGL0B00352g/CAGL0I09790g/CAGL0I07975g/CAGL0I00792g/CAGL0L07678g/CAGL0M08118g/CAGL0H03377g/CAGL0H03773g/CAGL0E03938g/CAGL0M10197g/CAGL0H05643g/CAGL0J00737g/CAGL0G09130g/CAGL0C01639g/CAGL0L003…
3	GO:0016072	rRNA metabolic process	0	245	108	CAGL0K06061g/CAGL0I03234g/CAGL0K03135g/CAGL0J09086g/CAGL0M00946g/CAGL0J07766g/CAGL0J03234g/CAGL0K08382g/CAGL0M06303g/CAGL0G07227g/CAGL0L08118g/CAGL0E05478g/CAGL0L04510g/CAGL0J10802g/CAGL0G08173g/CAGL0A01540g/CAGL0M06501g/CAGL0G00154g/CAGL0B00352g/CAGL0I09790g/CAGL0I07975g/CAGL0I00792g/CAGL0L07678g/CAGL0M08118g/CAGL0H03377g/CAGL0H03773g/CAGL0E03938g/CAGL0M10197g/CAGL0H05643g/CAGL0J00737g/CAGL0G091…
4	GO:0006412	translation	0	360	128	CAGL0I03476g/CAGL0K06061g/CAGL0L08114g/CAGL0E04994g/CAGL0K03135g/CAGL0L10978g/CAGL0J09086g/CAGL0I01430g/CAGL0J06374g/CAGL0J03234g/CAGL0M12386g/CAGL0B04257g/CAGL0K06567g/CAGL0A02189g/CAGL0K08382g/CAGL0M06303g/CAGL0J00473g/CAGL0I00814g/CAGL0G07227g/CAGL0L08118g/CAGL0J07238g/CAGL0M02497g/CAGL0L04510g/CAGL0M03861g/CAGL0F01683g/CAGL0A03278g/CAGL0G08173g/CAGL0A03168g/CAGL0G06490g/CAGL0J08679g/CAGL0M065…
5	GO:0042274	ribosomal small subunit biogenesis	0	107	66	CAGL0K06061g/CAGL0I03234g/CAGL0K03135g/CAGL0M00946g/CAGL0J03234g/CAGL0K08382g/CAGL0M06303g/CAGL0G07227g/CAGL0L08118g/CAGL0L04510g/CAGL0G08173g/CAGL0M06501g/CAGL0B00352g/CAGL0I09790g/CAGL0G05742g/CAGL0I00792g/CAGL0K06149g/CAGL0H05643g/CAGL0E01991g/CAGL0J00737g/CAGL0C01639g/CAGL0M01056g/CAGL0D00880g/CAGL0E02343g/CAGL0M07227g/CAGL0H02189g/CAGL0G05027g/CAGL0I10560g/CAGL0G01991g/CAGL0M00814g/CAGL0J102…
6	GO:0043603	cellular amide metabolic process	0	429	134	CAGL0I03476g/CAGL0H03993g/CAGL0K06061g/CAGL0L08114g/CAGL0E04994g/CAGL0K03135g/CAGL0L10978g/CAGL0J09086g/CAGL0I01430g/CAGL0J06374g/CAGL0J03234g/CAGL0M12386g/CAGL0B04257g/CAGL0K06567g/CAGL0A02189g/CAGL0K08382g/CAGL0M06303g/CAGL0J00473g/CAGL0I00814g/CAGL0G07227g/CAGL0L08118g/CAGL0J07238g/CAGL0M02497g/CAGL0L04510g/CAGL0M03861g/CAGL0F01683g/CAGL0A03278g/CAGL0G08173g/CAGL0A03168g/CAGL0G06490g/CAGL0J086…
7	GO:0030490	maturation of SSU-rRNA	0	90	58	CAGL0K06061g/CAGL0I03234g/CAGL0K03135g/CAGL0M00946g/CAGL0J03234g/CAGL0K08382g/CAGL0M06303g/CAGL0G07227g/CAGL0L08118g/CAGL0L04510g/CAGL0G08173g/CAGL0M06501g/CAGL0B00352g/CAGL0I09790g/CAGL0I00792g/CAGL0H05643g/CAGL0J00737g/CAGL0C01639g/CAGL0M01056g/CAGL0D00880g/CAGL0E02343g/CAGL0M07227g/CAGL0G05027g/CAGL0I10560g/CAGL0M00814g/CAGL0G07843g/CAGL0C03355g/CAGL0L04840g/CAGL0E03069g/CAGL0C03531g/CAGL0H029…
8	GO:0000462	maturation of SSU-rRNA from tricistronic rRNA transcript (SSU-rRNA, 5.8S rRNA, LSU-rRNA)	0	78	52	CAGL0I03234g/CAGL0K03135g/CAGL0M00946g/CAGL0J03234g/CAGL0K08382g/CAGL0M06303g/CAGL0G07227g/CAGL0L08118g/CAGL0M06501g/CAGL0B00352g/CAGL0I09790g/CAGL0I00792g/CAGL0H05643g/CAGL0J00737g/CAGL0C01639g/CAGL0M01056g/CAGL0D00880g/CAGL0E02343g/CAGL0M07227g/CAGL0G05027g/CAGL0I10560g/CAGL0M00814g/CAGL0G07843g/CAGL0C03355g/CAGL0L04840g/CAGL0E03069g/CAGL0H02937g/CAGL0F02299g/CAGL0K09460g/CAGL0A04521g/CAGL0M014…
9	GO:0006396	RNA processing	0	438	129	CAGL0K06061g/CAGL0I03234g/CAGL0K03135g/CAGL0J09086g/CAGL0M00946g/CAGL0J03234g/CAGL0H07975g/CAGL0K08382g/CAGL0M06303g/CAGL0G07227g/CAGL0L08118g/CAGL0L04510g/CAGL0J10802g/CAGL0G08173g/CAGL0A01540g/CAGL0M06501g/CAGL0G00154g/CAGL0B00352g/CAGL0H03685g/CAGL0I09790g/CAGL0L10934g/CAGL0I07975g/CAGL0I00792g/CAGL0L07678g/CAGL0M08118g/CAGL0H03377g/CAGL0H03773g/CAGL0E03938g/CAGL0M10197g/CAGL0H05643g/CAGL0J007…
10	GO:0042273	ribosomal large subunit biogenesis	0	82	45	CAGL0J09086g/CAGL0L10890g/CAGL0L03806g/CAGL0G08041g/CAGL0G02475g/CAGL0I07975g/CAGL0M08118g/CAGL0H03377g/CAGL0H03773g/CAGL0E03938g/CAGL0M10197g/CAGL0M02695g/CAGL0L11462g/CAGL0G09130g/CAGL0L00341g/CAGL0H05709g/CAGL0G01826g/CAGL0L02871g/CAGL0B01203g/CAGL0G07843g/CAGL0E03289g/CAGL0C03531g/CAGL0L10516g/CAGL0J10890g/CAGL0M11616g/CAGL0J00957g/CAGL0F02299g/CAGL0J03476g/CAGL0F02937g/CAGL0F06809g/CAGL0M135…
11	GO:0000469	cleavage involved in rRNA processing	0	68	38	CAGL0K06061g/CAGL0K08382g/CAGL0G07227g/CAGL0L04510g/CAGL0J10802g/CAGL0B00352g/CAGL0I09790g/CAGL0I07975g/CAGL0M08118g/CAGL0H03377g/CAGL0H03773g/CAGL0J00737g/CAGL0C01639g/CAGL0M01056g/CAGL0D00880g/CAGL0E02343g/CAGL0G01991g/CAGL0B01203g/CAGL0I00594g/CAGL0C03355g/CAGL0H02937g/CAGL0F02299g/CAGL0K09460g/CAGL0J09614g/CAGL0G04411g/CAGL0B04169g/CAGL0I03608g/CAGL0D05874g/CAGL0E03223g/CAGL0K02211g/CAGL0M039…
12	GO:0000479	endonucleolytic cleavage of tricistronic rRNA transcript (SSU-rRNA, 5.8S rRNA, LSU-rRNA)	0	45	30	CAGL0K08382g/CAGL0G07227g/CAGL0B00352g/CAGL0I09790g/CAGL0I07975g/CAGL0M08118g/CAGL0H03377g/CAGL0J00737g/CAGL0C01639g/CAGL0M01056g/CAGL0D00880g/CAGL0E02343g/CAGL0B01203g/CAGL0C03355g/CAGL0H02937g/CAGL0F02299g/CAGL0K09460g/CAGL0G04411g/CAGL0B04169g/CAGL0I03608g/CAGL0D05874g/CAGL0K02211g/CAGL0M03905g/CAGL0G07535g/CAGL0K09284g/CAGL0C00737g/CAGL0E05874g/CAGL0B01232g/CAGL0M04279g/CAGL0E02673g
13	GO:0000478	endonucleolytic cleavage involved in rRNA processing	0	46	30	CAGL0K08382g/CAGL0G07227g/CAGL0B00352g/CAGL0I09790g/CAGL0I07975g/CAGL0M08118g/CAGL0H03377g/CAGL0J00737g/CAGL0C01639g/CAGL0M01056g/CAGL0D00880g/CAGL0E02343g/CAGL0B01203g/CAGL0C03355g/CAGL0H02937g/CAGL0F02299g/CAGL0K09460g/CAGL0G04411g/CAGL0B04169g/CAGL0I03608g/CAGL0D05874g/CAGL0K02211g/CAGL0M03905g/CAGL0G07535g/CAGL0K09284g/CAGL0C00737g/CAGL0E05874g/CAGL0B01232g/CAGL0M04279g/CAGL0E02673g
14	GO:0002181	cytoplasmic translation	0	72	37	CAGL0E04994g/CAGL0M02497g/CAGL0F01683g/CAGL0A03168g/CAGL0J08679g/CAGL0D00616g/CAGL0B00792g/CAGL0K06033g/CAGL0M08118g/CAGL0G01078g/CAGL0G09669g/CAGL0K08888g/CAGL0L06952g/CAGL0L11462g/CAGL0K10906g/CAGL0H02409g/CAGL0J04576g/CAGL0B03795g/CAGL0M12122g/CAGL0J02354g/CAGL0L10560g/CAGL0J07898g/CAGL0A03388g/CAGL0D05214g/CAGL0K04741g/CAGL0C05379g/CAGL0L06754g/CAGL0M01804g/CAGL0G00990g/CAGL0M06369g/CAGL0H009…
15	GO:0000466	maturation of 5.8S rRNA from tricistronic rRNA transcript (SSU-rRNA, 5.8S rRNA, LSU-rRNA)	0	70	34	CAGL0K08382g/CAGL0G07227g/CAGL0B00352g/CAGL0I09790g/CAGL0I07975g/CAGL0M08118g/CAGL0H03377g/CAGL0H03773g/CAGL0C01639g/CAGL0M01056g/CAGL0E02343g/CAGL0B01203g/CAGL0I00594g/CAGL0C03355g/CAGL0H02937g/CAGL0F02299g/CAGL0K09460g/CAGL0G04411g/CAGL0B04169g/CAGL0G06248g/CAGL0I03608g/CAGL0L09669g/CAGL0K02233g/CAGL0D05874g/CAGL0E03223g/CAGL0K02211g/CAGL0M03905g/CAGL0G07535g/CAGL0F07139g/CAGL0K09284g/CAGL0C007…
16	GO:0000447	endonucleolytic cleavage in ITS1 to separate SSU-rRNA from 5.8S rRNA and LSU-rRNA from tricistronic rRNA transcript (SSU-rRNA, 5.8S rRNA, LSU-rRNA)	0	35	23	CAGL0K08382g/CAGL0G07227g/CAGL0B00352g/CAGL0I09790g/CAGL0C01639g/CAGL0M01056g/CAGL0E02343g/CAGL0C03355g/CAGL0H02937g/CAGL0F02299g/CAGL0K09460g/CAGL0G04411g/CAGL0B04169g/CAGL0I03608g/CAGL0D05874g/CAGL0K02211g/CAGL0M03905g/CAGL0G07535g/CAGL0K09284g/CAGL0C00737g/CAGL0B01232g/CAGL0M04279g/CAGL0E02673g
17	GO:0042255	ribosome assembly	0	42	25	CAGL0K06061g/CAGL0L08118g/CAGL0L04510g/CAGL0G08173g/CAGL0G02475g/CAGL0I07975g/CAGL0K06149g/CAGL0M10197g/CAGL0M02695g/CAGL0L11462g/CAGL0J00737g/CAGL0K02123g/CAGL0G01826g/CAGL0M05775g/CAGL0C03355g/CAGL0J10890g/CAGL0M11616g/CAGL0J03476g/CAGL0F02937g/CAGL0F06809g/CAGL0B04169g/CAGL0K11748g/CAGL0G00990g/CAGL0D02706g/CAGL0G07535g
18	GO:0046390	ribose phosphate biosynthetic process	0	57	29	CAGL0K02409g/CAGL0F02563g/CAGL0K05027g/CAGL0I07969g/CAGL0F03927g/CAGL0H05489g/CAGL0A03036g/CAGL0M09581g/CAGL0I04686g/CAGL0H00506g/CAGL0G07106g/CAGL0L09713g/CAGL0H01397g/CAGL0H04191g/CAGL0F04433g/CAGL0I05500g/CAGL0B02794g/CAGL0M13277g/CAGL0K06281g/CAGL0B02717g/CAGL0A03366g/CAGL0M13717g/CAGL0M00484g/CAGL0I00572g/CAGL0D00550g/CAGL0I03080g/CAGL0C05181g/CAGL0A00495g/CAGL0A01111g
19	GO:0006164	purine nucleotide biosynthetic process	0	50	25	CAGL0K02409g/CAGL0F02563g/CAGL0K05027g/CAGL0I07969g/CAGL0F03927g/CAGL0H05489g/CAGL0A03036g/CAGL0M09581g/CAGL0I04686g/CAGL0K10780g/CAGL0H00506g/CAGL0G07106g/CAGL0L09713g/CAGL0H01397g/CAGL0H04191g/CAGL0B02794g/CAGL0M13277g/CAGL0K06281g/CAGL0B02717g/CAGL0A03366g/CAGL0M13717g/CAGL0M00484g/CAGL0I00572g/CAGL0A00495g/CAGL0A01111g
20	GO:0000480	endonucleolytic cleavage in 5'-ETS of tricistronic rRNA transcript (SSU-rRNA, 5.8S rRNA, LSU-rRNA)	0	24	17	CAGL0I09790g/CAGL0M01056g/CAGL0E02343g/CAGL0C03355g/CAGL0H02937g/CAGL0F02299g/CAGL0G04411g/CAGL0B04169g/CAGL0I03608g/CAGL0D05874g/CAGL0K02211g/CAGL0K09284g/CAGL0C00737g/CAGL0E05874g/CAGL0B01232g/CAGL0M04279g/CAGL0E02673g
21	GO:0000054	ribosomal subunit export from nucleus	0	45	23	CAGL0K06061g/CAGL0L04510g/CAGL0G00154g/CAGL0G08041g/CAGL0G02475g/CAGL0H05709g/CAGL0L06314g/CAGL0C02343g/CAGL0C03369g/CAGL0F02299g/CAGL0K04741g/CAGL0C05379g/CAGL0J11220g/CAGL0D00220g/CAGL0I02398g/CAGL0D02706g/CAGL0G07535g/CAGL0H00935g/CAGL0H09724g/CAGL0D02838g/CAGL0K01089g/CAGL0F08129g/CAGL0M04961g
22	GO:0009152	purine ribonucleotide biosynthetic process	0	49	24	CAGL0K02409g/CAGL0F02563g/CAGL0K05027g/CAGL0I07969g/CAGL0F03927g/CAGL0H05489g/CAGL0A03036g/CAGL0M09581g/CAGL0I04686g/CAGL0H00506g/CAGL0G07106g/CAGL0L09713g/CAGL0H01397g/CAGL0H04191g/CAGL0B02794g/CAGL0M13277g/CAGL0K06281g/CAGL0B02717g/CAGL0A03366g/CAGL0M13717g/CAGL0M00484g/CAGL0I00572g/CAGL0A00495g/CAGL0A01111g
23	GO:0009165	nucleotide biosynthetic process	0	79	31	CAGL0K02409g/CAGL0F02563g/CAGL0K05027g/CAGL0I07969g/CAGL0F03927g/CAGL0H05489g/CAGL0A03036g/CAGL0M09581g/CAGL0I04686g/CAGL0K10780g/CAGL0H00506g/CAGL0G07106g/CAGL0L09713g/CAGL0H01397g/CAGL0H04191g/CAGL0F04433g/CAGL0I05500g/CAGL0K02541g/CAGL0B02794g/CAGL0M13277g/CAGL0K06281g/CAGL0B02717g/CAGL0A03366g/CAGL0M13717g/CAGL0M00484g/CAGL0I00572g/CAGL0D00550g/CAGL0I03080g/CAGL0C05181g/CAGL0A00495g/CAGL0A011…
24	GO:0000472	endonucleolytic cleavage to generate mature 5'-end of SSU-rRNA from (SSU-rRNA, 5.8S rRNA, LSU-rRNA)	0	25	17	CAGL0I09790g/CAGL0M01056g/CAGL0E02343g/CAGL0C03355g/CAGL0H02937g/CAGL0F02299g/CAGL0K09460g/CAGL0G04411g/CAGL0B04169g/CAGL0I03608g/CAGL0D05874g/CAGL0K09284g/CAGL0C00737g/CAGL0E05874g/CAGL0B01232g/CAGL0M04279g/CAGL0E02673g
25	GO:0042775	mitochondrial ATP synthesis coupled electron transport	0	21	15	CAGL0J00429g/CAGL0C02623g/CAGL0G10153g/CAGL0C01325g/CAGL0I06270g/CAGL0L06160g/CAGL0I03190g/CAGL0D00748g/CAGL0H09328g/CAGL0D05192g/CAGL0H02491g/CAGL0G10131g/CAGL0I01408g/CAGL0L10406g/CAGL0K02893g
26	GO:0022900	electron transport chain	0	24	16	CAGL0J00429g/CAGL0C02623g/CAGL0G10153g/CAGL0C01325g/CAGL0I06270g/CAGL0L06160g/CAGL0I03190g/CAGL0D00748g/CAGL0H09328g/CAGL0D05192g/CAGL0H02491g/CAGL0G10131g/CAGL0I01408g/CAGL0L10406g/CAGL0K02893g/CAGL0J00847g
27	GO:0019693	ribose phosphate metabolic process	0	96	33	CAGL0K02409g/CAGL0H03993g/CAGL0H07579g/CAGL0F02563g/CAGL0K05027g/CAGL0I07969g/CAGL0F03927g/CAGL0H05489g/CAGL0A03036g/CAGL0M09581g/CAGL0I04686g/CAGL0H00506g/CAGL0G07106g/CAGL0L09713g/CAGL0H01397g/CAGL0H04191g/CAGL0F04433g/CAGL0I05500g/CAGL0B02794g/CAGL0M13277g/CAGL0K06281g/CAGL0B02717g/CAGL0A03366g/CAGL0M13717g/CAGL0M00484g/CAGL0I00572g/CAGL0D00550g/CAGL0J04268g/CAGL0I03080g/CAGL0C05181g/CAGL0A004…
28	GO:0009060	aerobic respiration	0	72	28	CAGL0C03223g/CAGL0J00429g/CAGL0C02623g/CAGL0G10153g/CAGL0C01325g/CAGL0I06270g/CAGL0L06160g/CAGL0H03993g/CAGL0I03190g/CAGL0D06424g/CAGL0D00748g/CAGL0H09328g/CAGL0D05192g/CAGL0H02491g/CAGL0G10131g/CAGL0I01408g/CAGL0D01958g/CAGL0F04213g/CAGL0G08712g/CAGL0F04565g/CAGL0I07227g/CAGL0L05236g/CAGL0L10406g/CAGL0H00506g/CAGL0L06204g/CAGL0K02893g/CAGL0J00847g/CAGL0E01287g
29	GO:0022904	respiratory electron transport chain	0	22	15	CAGL0J00429g/CAGL0C02623g/CAGL0G10153g/CAGL0C01325g/CAGL0I06270g/CAGL0L06160g/CAGL0I03190g/CAGL0D00748g/CAGL0H09328g/CAGL0D05192g/CAGL0H02491g/CAGL0G10131g/CAGL0I01408g/CAGL0L10406g/CAGL0K02893g
30	GO:0006399	tRNA metabolic process	0	163	45	CAGL0H07975g/CAGL0A02189g/CAGL0L03872g/CAGL0G10109g/CAGL0K12012g/CAGL0L10934g/CAGL0A02112g/CAGL0J10010g/CAGL0B04125g/CAGL0L11660g/CAGL0B01881g/CAGL0C03531g/CAGL0J09746g/CAGL0M13431g/CAGL0H08415g/CAGL0K07656g/CAGL0H02431g/CAGL0F01705g/CAGL0E05676g/CAGL0K01859g/CAGL0L03025g/CAGL0M12991g/CAGL0H09372g/CAGL0M06369g/CAGL0A02090g/CAGL0E03223g/CAGL0H10406g/CAGL0L05566g/CAGL0M03487g/CAGL0J07744g/CAGL0J037…
31	GO:0006407	rRNA export from nucleus	0	12	11	CAGL0K06061g/CAGL0G07227g/CAGL0L04510g/CAGL0F07073g/CAGL0H00462g/CAGL0E01991g/CAGL0M04873g/CAGL0K02123g/CAGL0F01045g/CAGL0J11220g/CAGL0M04961g
32	GO:0045333	cellular respiration	0	83	29	CAGL0C03223g/CAGL0J00429g/CAGL0C02623g/CAGL0G10153g/CAGL0C01325g/CAGL0I06270g/CAGL0L06160g/CAGL0H03993g/CAGL0I03190g/CAGL0D06424g/CAGL0D00748g/CAGL0H09328g/CAGL0D05192g/CAGL0H02491g/CAGL0G10131g/CAGL0I01408g/CAGL0D01958g/CAGL0F04213g/CAGL0G08712g/CAGL0F04565g/CAGL0I07227g/CAGL0L05236g/CAGL0F05863g/CAGL0L10406g/CAGL0H00506g/CAGL0L06204g/CAGL0K02893g/CAGL0J00847g/CAGL0E01287g
33	GO:0000470	maturation of LSU-rRNA	0	35	18	CAGL0J09086g/CAGL0I07975g/CAGL0M08118g/CAGL0H03377g/CAGL0H03773g/CAGL0E03938g/CAGL0G09130g/CAGL0B01203g/CAGL0C03531g/CAGL0M13519g/CAGL0G06248g/CAGL0L09669g/CAGL0F04983g/CAGL0K02233g/CAGL0J10032g/CAGL0F07139g/CAGL0H09724g/CAGL0F01023g
34	GO:0006163	purine nucleotide metabolic process	0	86	29	CAGL0K02409g/CAGL0H03993g/CAGL0H07579g/CAGL0F02563g/CAGL0K05027g/CAGL0I07969g/CAGL0F03927g/CAGL0H05489g/CAGL0A03036g/CAGL0M09581g/CAGL0I04686g/CAGL0K10780g/CAGL0H00506g/CAGL0G07106g/CAGL0L09713g/CAGL0H01397g/CAGL0H04191g/CAGL0B02794g/CAGL0M13277g/CAGL0K06281g/CAGL0B02717g/CAGL0A03366g/CAGL0M13717g/CAGL0M00484g/CAGL0I00572g/CAGL0J04268g/CAGL0A00495g/CAGL0A01111g/CAGL0C03630g
35	GO:0006754	ATP biosynthetic process	0	20	13	CAGL0K02409g/CAGL0I07969g/CAGL0H05489g/CAGL0A03036g/CAGL0M09581g/CAGL0I04686g/CAGL0H00506g/CAGL0L09713g/CAGL0H01397g/CAGL0H04191g/CAGL0I00572g/CAGL0A00495g/CAGL0A01111g
36	GO:0009451	RNA modification	0	95	30	CAGL0J10802g/CAGL0H03685g/CAGL0L10934g/CAGL0L07678g/CAGL0J10010g/CAGL0B01881g/CAGL0C03531g/CAGL0J09746g/CAGL0M13431g/CAGL0H02431g/CAGL0E05676g/CAGL0K01859g/CAGL0J09614g/CAGL0H02057g/CAGL0M06369g/CAGL0H10406g/CAGL0L05566g/CAGL0J10032g/CAGL0J03718g/CAGL0I07667g/CAGL0E00979g/CAGL0H10252g/CAGL0M05797g/CAGL0K08360g/CAGL0M06941g/CAGL0B01232g/CAGL0L03586g/CAGL0E05764g/CAGL0K02937g/CAGL0E01925g
37	GO:0031503	protein-containing complex localization	0	66	24	CAGL0K06061g/CAGL0L04510g/CAGL0G00154g/CAGL0G08041g/CAGL0G02475g/CAGL0H05709g/CAGL0L06314g/CAGL0C02343g/CAGL0C03369g/CAGL0F02299g/CAGL0K04741g/CAGL0C05379g/CAGL0J11220g/CAGL0D00220g/CAGL0I02398g/CAGL0J11440g/CAGL0D02706g/CAGL0G07535g/CAGL0H00935g/CAGL0H09724g/CAGL0D02838g/CAGL0K01089g/CAGL0F08129g/CAGL0M04961g
38	GO:0006122	mitochondrial electron transport, ubiquinol to cytochrome c	0	10	9	CAGL0G10153g/CAGL0I06270g/CAGL0I03190g/CAGL0H09328g/CAGL0D05192g/CAGL0G10131g/CAGL0I01408g/CAGL0L10406g/CAGL0K02893g
39	GO:0097064	ncRNA export from nucleus	0	28	15	CAGL0K06061g/CAGL0G07227g/CAGL0L04510g/CAGL0F07073g/CAGL0H00462g/CAGL0E01991g/CAGL0M04873g/CAGL0K02123g/CAGL0F01045g/CAGL0I10560g/CAGL0J11220g/CAGL0G03003g/CAGL0D01188g/CAGL0K07832g/CAGL0M04961g
40	GO:0000027	ribosomal large subunit assembly	0	22	13	CAGL0G02475g/CAGL0I07975g/CAGL0M10197g/CAGL0M02695g/CAGL0L11462g/CAGL0G01826g/CAGL0J10890g/CAGL0M11616g/CAGL0J03476g/CAGL0F02937g/CAGL0F06809g/CAGL0G00990g/CAGL0D02706g
41	GO:0015986	ATP synthesis coupled proton transport	0	19	12	CAGL0K02409g/CAGL0I07969g/CAGL0H05489g/CAGL0A03036g/CAGL0M09581g/CAGL0I04686g/CAGL0H00506g/CAGL0L09713g/CAGL0H01397g/CAGL0H04191g/CAGL0I00572g/CAGL0A01111g
42	GO:0001510	RNA methylation	0	30	15	CAGL0J10010g/CAGL0B01881g/CAGL0C03531g/CAGL0J09746g/CAGL0H02431g/CAGL0K01859g/CAGL0H10406g/CAGL0L05566g/CAGL0J10032g/CAGL0I07667g/CAGL0E00979g/CAGL0H10252g/CAGL0M06941g/CAGL0B01232g/CAGL0E01925g
43	GO:0009117	nucleotide metabolic process	0	138	36	CAGL0K02409g/CAGL0H03993g/CAGL0H07579g/CAGL0J06380g/CAGL0F02563g/CAGL0K05027g/CAGL0I07969g/CAGL0F03927g/CAGL0H05489g/CAGL0A03036g/CAGL0M09581g/CAGL0I04686g/CAGL0K10780g/CAGL0H00506g/CAGL0G07106g/CAGL0L09713g/CAGL0H01397g/CAGL0H04191g/CAGL0F04433g/CAGL0I05500g/CAGL0K02541g/CAGL0B02794g/CAGL0M13277g/CAGL0K06281g/CAGL0B02717g/CAGL0A03366g/CAGL0M13717g/CAGL0M00484g/CAGL0I00572g/CAGL0D00550g/CAGL0J042…
44	GO:0022618	ribonucleoprotein complex assembly	0	104	30	CAGL0K06061g/CAGL0L08118g/CAGL0L04510g/CAGL0G08173g/CAGL0G02475g/CAGL0I07975g/CAGL0K06149g/CAGL0M10197g/CAGL0M02695g/CAGL0L11462g/CAGL0H02409g/CAGL0J00737g/CAGL0B03795g/CAGL0H05709g/CAGL0G01826g/CAGL0C03355g/CAGL0L00495g/CAGL0J10890g/CAGL0M11616g/CAGL0J00957g/CAGL0J03476g/CAGL0F02937g/CAGL0F06809g/CAGL0B04169g/CAGL0K11748g/CAGL0G00990g/CAGL0H00957g/CAGL0D02706g/CAGL0J10032g/CAGL0K09240g
45	GO:0006414	translational elongation	0	39	17	CAGL0I03476g/CAGL0I01430g/CAGL0J06374g/CAGL0I00814g/CAGL0A03168g/CAGL0G00154g/CAGL0F08547g/CAGL0J04576g/CAGL0L10560g/CAGL0K04741g/CAGL0C05379g/CAGL0G00990g/CAGL0M06369g/CAGL0A03234g/CAGL0L05148g/CAGL0D01188g/CAGL0K07832g
46	GO:0000463	maturation of LSU-rRNA from tricistronic rRNA transcript (SSU-rRNA, 5.8S rRNA, LSU-rRNA)	0	31	15	CAGL0J09086g/CAGL0I07975g/CAGL0M08118g/CAGL0H03377g/CAGL0H03773g/CAGL0B01203g/CAGL0M13519g/CAGL0G06248g/CAGL0L09669g/CAGL0F04983g/CAGL0K02233g/CAGL0J10032g/CAGL0F07139g/CAGL0H09724g/CAGL0F01023g
47	GO:0030488	tRNA methylation	0	17	11	CAGL0J10010g/CAGL0B01881g/CAGL0C03531g/CAGL0J09746g/CAGL0H02431g/CAGL0H10406g/CAGL0L05566g/CAGL0I07667g/CAGL0E00979g/CAGL0H10252g/CAGL0E01925g
48	GO:0006913	nucleocytoplasmic transport	0	180	42	CAGL0K06061g/CAGL0G07227g/CAGL0L04510g/CAGL0G00154g/CAGL0G08041g/CAGL0G02475g/CAGL0F07073g/CAGL0H00462g/CAGL0E01991g/CAGL0M04873g/CAGL0C01639g/CAGL0H05709g/CAGL0L06314g/CAGL0K02123g/CAGL0F01045g/CAGL0I10560g/CAGL0I00594g/CAGL0L04840g/CAGL0C02343g/CAGL0C03369g/CAGL0F02299g/CAGL0H03707g/CAGL0K04741g/CAGL0C05379g/CAGL0J11220g/CAGL0D00220g/CAGL0G03443g/CAGL0G03795g/CAGL0I02398g/CAGL0J11440g/CAGL0G030…
49	GO:0006413	translational initiation	0	57	20	CAGL0L10978g/CAGL0G08041g/CAGL0G09669g/CAGL0K08888g/CAGL0L06952g/CAGL0H02409g/CAGL0B03795g/CAGL0J10010g/CAGL0E03289g/CAGL0H03707g/CAGL0M01804g/CAGL0H00957g/CAGL0E01463g/CAGL0M13893g/CAGL0C01221g/CAGL0D03718g/CAGL0I04356g/CAGL0K09966g/CAGL0K04345g/CAGL0B03927g
50	GO:0000028	ribosomal small subunit assembly	0	13	9	CAGL0K06061g/CAGL0L08118g/CAGL0L04510g/CAGL0G08173g/CAGL0K06149g/CAGL0J00737g/CAGL0C03355g/CAGL0B04169g/CAGL0K11748g
51	GO:0008033	tRNA processing	0	97	26	CAGL0H07975g/CAGL0L10934g/CAGL0J10010g/CAGL0B01881g/CAGL0C03531g/CAGL0J09746g/CAGL0M13431g/CAGL0H08415g/CAGL0H02431g/CAGL0E05676g/CAGL0K01859g/CAGL0M06369g/CAGL0H10406g/CAGL0L05566g/CAGL0J03718g/CAGL0I07667g/CAGL0E00979g/CAGL0J04334g/CAGL0H10252g/CAGL0M05797g/CAGL0F06435g/CAGL0K08360g/CAGL0L03586g/CAGL0E05764g/CAGL0K02937g/CAGL0E01925g
52	GO:0006400	tRNA modification	0	69	21	CAGL0L10934g/CAGL0J10010g/CAGL0B01881g/CAGL0C03531g/CAGL0J09746g/CAGL0M13431g/CAGL0H02431g/CAGL0E05676g/CAGL0M06369g/CAGL0H10406g/CAGL0L05566g/CAGL0J03718g/CAGL0I07667g/CAGL0E00979g/CAGL0H10252g/CAGL0M05797g/CAGL0K08360g/CAGL0L03586g/CAGL0E05764g/CAGL0K02937g/CAGL0E01925g
53	GO:0006450	regulation of translational fidelity	0	16	9	CAGL0M06501g/CAGL0G00154g/CAGL0D00616g/CAGL0F07073g/CAGL0L10560g/CAGL0L04840g/CAGL0K04741g/CAGL0C05379g/CAGL0M06369g
54	GO:0009168	purine ribonucleoside monophosphate biosynthetic process	0	16	9	CAGL0F02563g/CAGL0K05027g/CAGL0F03927g/CAGL0G07106g/CAGL0B02794g/CAGL0A03366g/CAGL0M13717g/CAGL0M00484g/CAGL0J05984g
55	GO:0006123	mitochondrial electron transport, cytochrome c to oxygen	0	10	7	CAGL0J00429g/CAGL0C02623g/CAGL0C01325g/CAGL0L06160g/CAGL0D00748g/CAGL0H02491g/CAGL0I01408g
56	GO:0009141	nucleoside triphosphate metabolic process	0	50	16	CAGL0K02409g/CAGL0H07579g/CAGL0I07969g/CAGL0H05489g/CAGL0A03036g/CAGL0M09581g/CAGL0I04686g/CAGL0H00506g/CAGL0L09713g/CAGL0H01397g/CAGL0H04191g/CAGL0F04433g/CAGL0M13277g/CAGL0I00572g/CAGL0A00495g/CAGL0A01111g
57	GO:0046034	ATP metabolic process	0	42	14	CAGL0K02409g/CAGL0H07579g/CAGL0I07969g/CAGL0H05489g/CAGL0A03036g/CAGL0M09581g/CAGL0I04686g/CAGL0H00506g/CAGL0L09713g/CAGL0H01397g/CAGL0H04191g/CAGL0I00572g/CAGL0A00495g/CAGL0A01111g
58	GO:0042797	tRNA transcription by RNA polymerase III	0	15	8	CAGL0L03872g/CAGL0G10109g/CAGL0B04125g/CAGL0L11660g/CAGL0L03025g/CAGL0M03487g/CAGL0J04070g/CAGL0L02849g
59	GO:0000154	rRNA modification	0	19	9	CAGL0J10802g/CAGL0L07678g/CAGL0C03531g/CAGL0K01859g/CAGL0J09614g/CAGL0J10032g/CAGL0J03718g/CAGL0M06941g/CAGL0B01232g
60	GO:0006099	tricarboxylic acid cycle	0	19	9	CAGL0C03223g/CAGL0H03993g/CAGL0D06424g/CAGL0D01958g/CAGL0G08712g/CAGL0I07227g/CAGL0L05236g/CAGL0J00847g/CAGL0E01287g
61	GO:0002183	cytoplasmic translational initiation	0.0001	22	9	CAGL0G09669g/CAGL0K08888g/CAGL0L06952g/CAGL0H02409g/CAGL0B03795g/CAGL0M01804g/CAGL0H00957g/CAGL0C01221g/CAGL0K09966g
62	GO:0000055	ribosomal large subunit export from nucleus	0.0002	27	10	CAGL0G02475g/CAGL0L06314g/CAGL0C03369g/CAGL0F02299g/CAGL0D00220g/CAGL0I02398g/CAGL0G07535g/CAGL0H09724g/CAGL0D02838g/CAGL0F08129g
63	GO:0006452	translational frameshifting	0.0002	7	5	CAGL0I01430g/CAGL0G00154g/CAGL0L10560g/CAGL0K04741g/CAGL0C05379g
64	GO:0032259	methylation	0.0002	93	21	CAGL0K06457g/CAGL0M06677g/CAGL0J10010g/CAGL0B01881g/CAGL0C03531g/CAGL0J09746g/CAGL0H02431g/CAGL0K01859g/CAGL0H10406g/CAGL0L05566g/CAGL0J10032g/CAGL0I07667g/CAGL0E00979g/CAGL0F09119g/CAGL0H10252g/CAGL0M00638g/CAGL0M06941g/CAGL0B01232g/CAGL0I04730g/CAGL0M00572g/CAGL0E01925g
65	GO:0009116	nucleoside metabolic process	0.0003	24	9	CAGL0F02563g/CAGL0G07106g/CAGL0I05500g/CAGL0K02541g/CAGL0M13717g/CAGL0M00484g/CAGL0D00550g/CAGL0I03080g/CAGL0C05181g
66	GO:0031120	snRNA pseudouridine synthesis	0.0004	8	5	CAGL0J10802g/CAGL0J09614g/CAGL0H02057g/CAGL0J03718g/CAGL0E05764g
67	GO:0001522	pseudouridine synthesis	0.0005	16	7	CAGL0J10802g/CAGL0H03685g/CAGL0J09614g/CAGL0H02057g/CAGL0J03718g/CAGL0M05797g/CAGL0E05764g
68	GO:0042407	cristae formation	0.0009	9	5	CAGL0K02409g/CAGL0I00572g/CAGL0G08195g/CAGL0G06600g/CAGL0B00396g
69	GO:0006360	transcription by RNA polymerase I	0.0009	62	15	CAGL0J07766g/CAGL0L03872g/CAGL0E05478g/CAGL0I07799g/CAGL0M07227g/CAGL0I10560g/CAGL0B04125g/CAGL0M01430g/CAGL0G04411g/CAGL0J01848g/CAGL0F03333g/CAGL0E05500g/CAGL0F00561g/CAGL0J04070g/CAGL0I06006g
70	GO:0000056	ribosomal small subunit export from nucleus	0.0009	13	6	CAGL0K06061g/CAGL0L04510g/CAGL0C02343g/CAGL0J11220g/CAGL0H00935g/CAGL0K01089g
71	GO:0051083	'de novo' cotranslational protein folding	0.0013	6	4	CAGL0G00154g/CAGL0L10560g/CAGL0K04741g/CAGL0C05379g
72	GO:0006526	arginine biosynthetic process	0.0016	10	5	CAGL0C05115g/CAGL0I09592g/CAGL0I10791g/CAGL0B01507g/CAGL0F06501g
73	GO:0006418	tRNA aminoacylation for protein translation	0.0026	37	10	CAGL0A02189g/CAGL0K12012g/CAGL0A02112g/CAGL0K07656g/CAGL0F01705g/CAGL0M12991g/CAGL0H09372g/CAGL0A02090g/CAGL0J07744g/CAGL0G03091g
74	GO:0070475	rRNA base methylation	0.0027	7	4	CAGL0C03531g/CAGL0J10032g/CAGL0M06941g/CAGL0B01232g
75	GO:0031167	rRNA methylation	0.0027	11	5	CAGL0C03531g/CAGL0K01859g/CAGL0J10032g/CAGL0M06941g/CAGL0B01232g
76	GO:0015931	nucleobase-containing compound transport	0.0036	128	23	CAGL0K06061g/CAGL0G09273g/CAGL0F04213g/CAGL0G07227g/CAGL0L04510g/CAGL0F04499g/CAGL0F07073g/CAGL0H00462g/CAGL0E01991g/CAGL0M04873g/CAGL0C01639g/CAGL0K02123g/CAGL0F01045g/CAGL0I10560g/CAGL0I00594g/CAGL0H03707g/CAGL0J11220g/CAGL0G03795g/CAGL0G03003g/CAGL0D01188g/CAGL0K07832g/CAGL0I04730g/CAGL0M04961g
77	GO:0051031	tRNA transport	0.0043	22	7	CAGL0I10560g/CAGL0H03707g/CAGL0G03795g/CAGL0G03003g/CAGL0D01188g/CAGL0K07832g/CAGL0M04961g
78	GO:0043039	tRNA aminoacylation	0.0049	40	10	CAGL0A02189g/CAGL0K12012g/CAGL0A02112g/CAGL0K07656g/CAGL0F01705g/CAGL0M12991g/CAGL0H09372g/CAGL0A02090g/CAGL0J07744g/CAGL0G03091g
79	GO:0006383	transcription by RNA polymerase III	0.0074	36	9	CAGL0L03872g/CAGL0G10109g/CAGL0I07799g/CAGL0B04125g/CAGL0L11660g/CAGL0L03025g/CAGL0M03487g/CAGL0J04070g/CAGL0L02849g
80	GO:0006415	translational termination	0.0084	19	6	CAGL0I01430g/CAGL0G08041g/CAGL0F08547g/CAGL0J02816g/CAGL0C05379g/CAGL0L06754g
81	GO:1902626	assembly of large subunit precursor of preribosome	0.0085	5	3	CAGL0H05709g/CAGL0J00957g/CAGL0J10032g
82	GO:0006525	arginine metabolic process	0.0091	14	5	CAGL0C05115g/CAGL0I09592g/CAGL0I10791g/CAGL0B01507g/CAGL0F06501g
83	GO:0042790	nucleolar large rRNA transcription by RNA polymerase I	0.0116	26	7	CAGL0J07766g/CAGL0E05478g/CAGL0J01848g/CAGL0F03333g/CAGL0E05500g/CAGL0F00561g/CAGL0I06006g
84	GO:0006520	cellular amino acid metabolic process	0.0149	184	28	CAGL0B00286g/CAGL0C05115g/CAGL0I09592g/CAGL0M00176g/CAGL0I10791g/CAGL0B01507g/CAGL0B01122g/CAGL0M12386g/CAGL0D00176g/CAGL0A02189g/CAGL0C02233g/CAGL0A03102g/CAGL0K12012g/CAGL0A02112g/CAGL0G01254g/CAGL0E03157g/CAGL0K07656g/CAGL0F01705g/CAGL0M12188g/CAGL0M12991g/CAGL0H09372g/CAGL0L02035g/CAGL0A02090g/CAGL0F06501g/CAGL0J07744g/CAGL0M07876g/CAGL0C01573g/CAGL0G03091g
85	GO:0006404	RNA import into nucleus	0.0158	6	3	CAGL0H03707g/CAGL0G03795g/CAGL0M04961g
86	GO:0031119	tRNA pseudouridine synthesis	0.0158	6	3	CAGL0J03718g/CAGL0M05797g/CAGL0E05764g
87	GO:1903833	positive regulation of cellular response to amino acid starvation	0.0158	6	3	CAGL0L02475g/CAGL0M12122g/CAGL0E01221g
88	GO:0006409	tRNA export from nucleus	0.0168	16	5	CAGL0I10560g/CAGL0G03003g/CAGL0D01188g/CAGL0K07832g/CAGL0M04961g
89	GO:0006458	'de novo' protein folding	0.0184	11	4	CAGL0G00154g/CAGL0L10560g/CAGL0K04741g/CAGL0C05379g
90	GO:0006613	cotranslational protein targeting to membrane	0.0219	17	5	CAGL0I00462g/CAGL0H00869g/CAGL0G03795g/CAGL0E05742g/CAGL0E05874g
91	GO:0006591	ornithine metabolic process	0.0256	7	3	CAGL0I10791g/CAGL0B01507g/CAGL0F06501g
92	GO:0007007	inner mitochondrial membrane organization	0.0273	24	6	CAGL0K02409g/CAGL0D01958g/CAGL0I00572g/CAGL0G08195g/CAGL0G06600g/CAGL0B00396g
93	GO:1901135	carbohydrate derivative metabolic process	0.0298	289	39	CAGL0K02409g/CAGL0H03993g/CAGL0H07579g/CAGL0F02563g/CAGL0K05027g/CAGL0I07969g/CAGL0F03927g/CAGL0H05489g/CAGL0A03036g/CAGL0M09581g/CAGL0I04686g/CAGL0H00506g/CAGL0G07106g/CAGL0L09713g/CAGL0H01397g/CAGL0H04191g/CAGL0F04433g/CAGL0K12848g/CAGL0I05500g/CAGL0K02541g/CAGL0B02794g/CAGL0M13277g/CAGL0K06281g/CAGL0B02717g/CAGL0A03366g/CAGL0M13717g/CAGL0M00484g/CAGL0E05676g/CAGL0I00572g/CAGL0D00550g/CAGL0J042…
94	GO:0034198	cellular response to amino acid starvation	0.0339	13	4	CAGL0L02475g/CAGL0K08888g/CAGL0M12122g/CAGL0E01221g
95	GO:0006448	regulation of translational elongation	0.0348	19	5	CAGL0I03476g/CAGL0I01430g/CAGL0J04576g/CAGL0M06369g/CAGL0A03234g
96	GO:0006457	protein folding	0.0352	99	16	CAGL0K06259g/CAGL0G07271g/CAGL0G00154g/CAGL0L10560g/CAGL0L00495g/CAGL0M06083g/CAGL0M08030g/CAGL0H03707g/CAGL0K04741g/CAGL0C05379g/CAGL0J06006g/CAGL0G03795g/CAGL0H08195g/CAGL0L02387g/CAGL0M00638g/CAGL0K09240g
97	GO:0019752	carboxylic acid metabolic process	0.0372	320	42	CAGL0B00286g/CAGL0C05115g/CAGL0H03993g/CAGL0I09592g/CAGL0M00176g/CAGL0I10791g/CAGL0H07579g/CAGL0B01507g/CAGL0I07227g/CAGL0L05236g/CAGL0K05027g/CAGL0B01122g/CAGL0M12386g/CAGL0D00176g/CAGL0A02189g/CAGL0C02233g/CAGL0A03102g/CAGL0K12012g/CAGL0A02112g/CAGL0K06787g/CAGL0B02794g/CAGL0D00528g/CAGL0G01254g/CAGL0E03157g/CAGL0B02717g/CAGL0E01287g/CAGL0I00418g/CAGL0K07656g/CAGL0F01705g/CAGL0M12188g/CAGL0M129…
98	GO:0001731	formation of translation preinitiation complex	0.0379	8	3	CAGL0H02409g/CAGL0B03795g/CAGL0H00957g
99	GO:0006189	'de novo' IMP biosynthetic process	0.0379	8	3	CAGL0B02794g/CAGL0A03366g/CAGL0M13717g
100	GO:0019856	pyrimidine nucleobase biosynthetic process	0.0379	8	3	CAGL0I09592g/CAGL0F04433g/CAGL0I03080g

## Sheet: FC of TCA and AA genes
Supplementary file 12 - List of genes whose fold change was compared between Cgxbp1∆ and wildtype under normal growth conditions
TCA cycle genes	log2FC	Pvalue
LSC2	-0.417371	1.69096e-05
ACO2	-0.23914	0.106696
IDH1	-0.143077	0.0873718
ACO1	0.272758	0.0015283
MDH1	-0.114129	0.218167
IDH2	-0.0183424	0.826347
CAGL0E01287g	-0.122719	0.176106
CAGL0A01045g	0.0249477	0.768908
CAGL0D01958g	0.0367495	0.674079
CAGL0G08712g	-0.00783424	0.930889
CAGL0C03223g	0.337833	0.000371736
CAGL0J00847g	-0.0153937	0.876602
CAGL0E01705g	0.745533	1.66789e-12
CAGL0H03993g	-0.0548803	0.601812
CAGL0L06798g	-0.304503	0.012675
Amino acids biosynthesis genes	log2FC	Pvalue
PRO1	0.127476	0.260195
TRP5	0.0666456	0.452476
MET13	-0.372308	0.0335154
CYS3	-0.117529	0.147791
LYS21	0.130646	0.268176
GLN1	0.329217	0.000134349
HIS4	0.195212	0.0564427
HOM3	-0.03389	0.721079
TRX2	-0.00571735	0.951472
HIS3	-0.012783	0.957914
LYS9	-0.10377	0.403606
STR3	-0.147511	0.736571
CYS4	-0.130528	0.129542
HOM2	-0.237004	0.0119581
LEU2	-0.117805	0.42827
LYS12	-0.0689334	0.755116
HIS1	-0.0350876	0.791755
MET15	0.284991	0.0487607
MET6	-0.565073	0.0827737
PRO2	-0.183785	0.0628405
PHO2	0.0223295	0.823038
FPR1	-0.179424	0.0400581
ASN2	-0.00447083	0.958461
CAGL0D03982g	-0.544151	3.87389e-05
CAGL0F07777g	-0.698221	7.02079e-06
CAGL0K03465g	0.170072	0.086743
CAGL0I08503g	-0.0752685	0.640459
CAGL0K12518g	-0.120334	0.477305
CAGL0C01243g	-0.127457	0.355547
CAGL0I09284g	0.0978786	0.750701
CAGL0F06875g	-0.0790586	0.609982
CAGL0F01749g	0.0908773	0.842836
CAGL0J06402g	0.347794	0.63957
CAGL0G06732g	0.0286906	0.778957
CAGL0A00363g	-0.12643	0.205723
CAGL0D00176g	0.178343	0.0413418
CAGL0I09592g	0.336451	0.0287889
CAGL0L12254g	-0.225106	0.0408355
CAGL0K07788g	-0.127806	0.314771
CAGL0A02574g	-0.0939222	0.371109
CAGL0D01892g	-0.00127677	0.989169
CAGL0K10978g	0.0531464	0.687072
CAGL0J08316g	-0.275657	0.0189706
CAGL0G09691g	-0.162934	0.140126
