# Supplementary material for: Temporal transcriptional response of Candida glabrata during macrophage infection reveals a multifaceted transcriptional regulator CgXbp1 important for macrophage response and fluconazole resistance
Source: eLife. 2024 Oct 2;13:e73832. doi: 10.7554/eLife.73832 (PMC11554308; doi:10.7554/eLife.73832)
Supplement: Supplementary file 13. [file elife-73832-supp13.xlsx]

## Sheet: Cgxbp1∆_Up_genes
	Supplementary File 13 - List of enriched GO terms for biological processes from upregulated genes in Cgxbp1∆ mutant compared to wildtype in YPD medium
S. No.	ID	Description	P-value	Number of genes in the background	Number of upregulated genes	Upregulated genes
1	GO:0055085	transmembrane transport	0	302	16	CAGL0G03927g/CAGL0L00671g/CAGL0B02343g/CAGL0L13354g/CAGL0E01705g/CAGL0A01804g/CAGL0G03795g/CAGL0G09042g/CAGL0H06017g/CAGL0A02321g/CAGL0F04499g/CAGL0G03289g/CAGL0I09724g/CAGL0J00363g/CAGL0B04455g/CAGL0D04708g
2	GO:0006855	drug transmembrane transport	0.0001	9	3	CAGL0G03927g/CAGL0B02343g/CAGL0H06017g
3	GO:0015851	nucleobase transport	0.0002	11	3	CAGL0L00671g/CAGL0L13354g/CAGL0F04499g
4	GO:0042908	xenobiotic transport	0.0003	12	3	CAGL0G03927g/CAGL0B02343g/CAGL0H06017g
5	GO:1904659	glucose transmembrane transport	0.004	9	2	CAGL0A01804g/CAGL0A02321g
6	GO:0008645	hexose transmembrane transport	0.0061	11	2	CAGL0A01804g/CAGL0A02321g
7	GO:0006616	SRP-dependent cotranslational protein targeting to membrane, translocation	0.0073	12	2	CAGL0G03795g/CAGL0G03289g
8	GO:0009405	pathogenesis	0.0105	171	6	CAGL0G03927g/CAGL0M12430g/CAGL0L00495g/CAGL0L13090g/CAGL0G09042g/CAGL0K07634g
9	GO:0046173	polyol biosynthetic process	0.0113	15	2	CAGL0M12430g/CAGL0H07271g
10	GO:0006614	SRP-dependent cotranslational protein targeting to membrane	0.0128	16	2	CAGL0G03795g/CAGL0G03289g
11	GO:0006613	cotranslational protein targeting to membrane	0.0144	17	2	CAGL0G03795g/CAGL0G03289g
12	GO:0009636	response to toxic substance	0.0301	25	2	CAGL0G03795g/CAGL0G03289g
13	GO:1900445	positive regulation of filamentous growth of a population of unicellular organisms in response to biotic stimulus	0.0324	26	2	CAGL0L13090g/CAGL0G09042g
14	GO:0036003	positive regulation of transcription from RNA polymerase II promoter in response to stress	0.0502	33	2	CAGL0L13090g/CAGL0G09042g
15	GO:0045047	protein targeting to ER	0.0502	33	2	CAGL0G03795g/CAGL0G03289g
16	GO:0015931	nucleobase-containing compound transport	0.0508	128	4	CAGL0L13354g/CAGL0G03795g/CAGL0G09273g/CAGL0F04499g
17	GO:1900443	regulation of filamentous growth of a population of unicellular organisms in response to biotic stimulus	0.0529	34	2	CAGL0L13090g/CAGL0G09042g
18	GO:0001080	nitrogen catabolite activation of transcription from RNA polymerase II promoter	0.0536	5	1	CAGL0K07634g
19	GO:0032958	inositol phosphate biosynthetic process	0.0536	5	1	CAGL0H07271g
20	GO:0044070	regulation of anion transport	0.0536	5	1	CAGL0G09042g
21	GO:0051220	cytoplasmic sequestering of protein	0.0536	5	1	CAGL0G08151g
22	GO:0097316	cellular response to N-acetyl-D-glucosamine	0.0536	5	1	CAGL0L13090g
23	GO:0006879	cellular iron ion homeostasis	0.0586	36	2	CAGL0G08151g/CAGL0G09042g
24	GO:0006388	tRNA splicing, via endonucleolytic cleavage and ligation	0.064	6	1	CAGL0F06435g
25	GO:0006404	RNA import into nucleus	0.064	6	1	CAGL0G03795g
26	GO:0036278	positive regulation of transcription from RNA polymerase II promoter in response to nitrogen starvation	0.064	6	1	CAGL0K07634g
27	GO:1900034	regulation of cellular response to heat	0.064	6	1	CAGL0G03289g
28	GO:0055072	iron ion homeostasis	0.0706	40	2	CAGL0G08151g/CAGL0G09042g
29	GO:0000492	box C/D snoRNP assembly	0.0743	7	1	CAGL0L00495g
30	GO:0006817	phosphate ion transport	0.0743	7	1	CAGL0G09042g
31	GO:0032974	amino acid transmembrane export from vacuole	0.0743	7	1	CAGL0B04455g
32	GO:0006066	alcohol metabolic process	0.0771	91	3	CAGL0M12430g/CAGL0H07271g/CAGL0M14047g
33	GO:0006612	protein targeting to membrane	0.0833	44	2	CAGL0G03795g/CAGL0G03289g
34	GO:0015833	peptide transport	0.0844	8	1	CAGL0G03927g
35	GO:0030476	ascospore wall assembly	0.0866	45	2	CAGL0H06237g/CAGL0F02651g
36	GO:0044743	protein transmembrane import into intracellular organelle	0.0933	47	2	CAGL0E01705g/CAGL0G03289g
37	GO:0071940	fungal-type cell wall assembly	0.0933	47	2	CAGL0H06237g/CAGL0F02651g
38	GO:0006457	protein folding	0.0938	99	3	CAGL0L00495g/CAGL0G03795g/CAGL0G03289g
39	GO:0006071	glycerol metabolic process	0.0945	9	1	CAGL0M12430g
40	GO:0006825	copper ion transport	0.0945	9	1	CAGL0D04708g
41	GO:0010106	cellular response to iron ion starvation	0.0945	9	1	CAGL0G09042g
42	GO:0015846	polyamine transport	0.0945	9	1	CAGL0G03927g
43	GO:0043392	negative regulation of DNA binding	0.0945	9	1	CAGL0G08151g
44	GO:0044409	entry into host	0.0945	9	1	CAGL0M12430g
45	GO:0070726	cell wall assembly	0.0967	48	2	CAGL0H06237g/CAGL0F02651g
46	GO:0032048	cardiolipin metabolic process	0.1044	10	1	CAGL0G09042g
47	GO:0034755	iron ion transmembrane transport	0.1044	10	1	CAGL0D04708g
48	GO:0043618	regulation of transcription from RNA polymerase II promoter in response to stress	0.1071	51	2	CAGL0L13090g/CAGL0G09042g
49	GO:0051701	interaction with host	0.1141	53	2	CAGL0M12430g/CAGL0G03289g
50	GO:0034486	vacuolar transmembrane transport	0.1142	11	1	CAGL0B04455g

## Sheet: Cgxbp1∆_Down_genes
Supplementary file 13 - List of enriched GO terms for biological processes from downregulated genes in Cgxbp1∆ mutant compared to wildtype in YPD medium
S. No.	ID	Description	P-value	Number of genes in the background	Number of downregulated genes	Downregulated genes
1	GO:0006112	energy reserve metabolic process	0	35	9	CAGL0J03080g/CAGL0F04719g/CAGL0M03377g/CAGL0K10626g/CAGL0F04895g/CAGL0H02695g/CAGL0L01925g/CAGL0H04037g/CAGL0G02717g
2	GO:0044262	cellular carbohydrate metabolic process	0	125	14	CAGL0F04719g/CAGL0M03377g/CAGL0I06050g/CAGL0H02387g/CAGL0K10626g/CAGL0F04895g/CAGL0H02695g/CAGL0L01925g/CAGL0H04037g/CAGL0G05335g/CAGL0G09020g/CAGL0J09812g/CAGL0G02717g/CAGL0H01089g
3	GO:0005977	glycogen metabolic process	0	33	8	CAGL0F04719g/CAGL0M03377g/CAGL0K10626g/CAGL0F04895g/CAGL0H02695g/CAGL0L01925g/CAGL0H04037g/CAGL0G02717g
4	GO:0005975	carbohydrate metabolic process	0	215	16	CAGL0F04719g/CAGL0M03377g/CAGL0I06050g/CAGL0H02387g/CAGL0K10626g/CAGL0F00605g/CAGL0F04895g/CAGL0H02695g/CAGL0C01397g/CAGL0L01925g/CAGL0H04037g/CAGL0G05335g/CAGL0G09020g/CAGL0J09812g/CAGL0G02717g/CAGL0H01089g
5	GO:0005992	trehalose biosynthetic process	0	7	4	CAGL0H02387g/CAGL0L01925g/CAGL0G05335g/CAGL0J09812g
6	GO:0005991	trehalose metabolic process	0	18	5	CAGL0H02387g/CAGL0L01925g/CAGL0G05335g/CAGL0G09020g/CAGL0J09812g
7	GO:0005978	glycogen biosynthetic process	0	19	5	CAGL0F04719g/CAGL0M03377g/CAGL0K10626g/CAGL0H02695g/CAGL0L01925g
8	GO:0009311	oligosaccharide metabolic process	0	26	5	CAGL0H02387g/CAGL0L01925g/CAGL0G05335g/CAGL0G09020g/CAGL0J09812g
9	GO:0000271	polysaccharide biosynthetic process	0.0007	50	5	CAGL0F04719g/CAGL0M03377g/CAGL0K10626g/CAGL0H02695g/CAGL0L01925g
10	GO:0005980	glycogen catabolic process	0.003	6	2	CAGL0F04895g/CAGL0G02717g
11	GO:0042631	cellular response to water deprivation	0.003	6	2	CAGL0I05934g/CAGL0J09812g
12	GO:0009117	nucleotide metabolic process	0.0037	138	7	CAGL0L00649g/CAGL0C02321g/CAGL0D06688g/CAGL0E06380g/CAGL0L11902g/CAGL0L04268g/CAGL0J09262g
13	GO:0009408	response to heat	0.013	97	5	CAGL0F04895g/CAGL0H04037g/CAGL0G05335g/CAGL0M13189g/CAGL0J09812g
14	GO:0006083	acetate metabolic process	0.0147	13	2	CAGL0L00649g/CAGL0D06688g
15	GO:0046173	polyol biosynthetic process	0.0194	15	2	CAGL0I06050g/CAGL0D00198g
16	GO:0031669	cellular response to nutrient levels	0.0196	234	8	CAGL0L04598g/CAGL0C02321g/CAGL0F06413g/CAGL0G05335g/CAGL0M13189g/CAGL0G09020g/CAGL0B03619g/CAGL0M03025g
17	GO:0009267	cellular response to starvation	0.0209	192	7	CAGL0L04598g/CAGL0C02321g/CAGL0F06413g/CAGL0G05335g/CAGL0M13189g/CAGL0G09020g/CAGL0B03619g
18	GO:0009266	response to temperature stimulus	0.0214	110	5	CAGL0F04895g/CAGL0H04037g/CAGL0G05335g/CAGL0M13189g/CAGL0J09812g
19	GO:0042594	response to starvation	0.0293	206	7	CAGL0L04598g/CAGL0C02321g/CAGL0F06413g/CAGL0G05335g/CAGL0M13189g/CAGL0G09020g/CAGL0B03619g
20	GO:0070787	conidiophore development	0.0335	20	2	CAGL0G09020g/CAGL0M03025g
21	GO:0001678	cellular glucose homeostasis	0.0367	21	2	CAGL0F00605g/CAGL0G09020g
22	GO:0006066	alcohol metabolic process	0.0428	91	4	CAGL0I06050g/CAGL0D00198g/CAGL0D06688g/CAGL0H01089g
23	GO:0009116	nucleoside metabolic process	0.0469	24	2	CAGL0J10494g/CAGL0L04268g
24	GO:0046496	nicotinamide nucleotide metabolic process	0.0469	24	2	CAGL0D06688g/CAGL0E06380g
25	GO:0016052	carbohydrate catabolic process	0.0473	56	3	CAGL0F04895g/CAGL0G09020g/CAGL0G02717g
26	GO:0030435	sporulation resulting in formation of a cellular spore	0.0664	150	5	CAGL0G09020g/CAGL0B03619g/CAGL0J09812g/CAGL0J04884g/CAGL0L06578g
27	GO:0006003	fructose 2,6-bisphosphate metabolic process	0.0707	5	1	CAGL0C01397g
28	GO:0006561	proline biosynthetic process	0.0707	5	1	CAGL0D03894g
29	GO:0007039	protein catabolic process in the vacuole	0.0707	5	1	CAGL0B03619g
30	GO:0009166	nucleotide catabolic process	0.0707	5	1	CAGL0C02321g
31	GO:0061404	positive regulation of transcription from RNA polymerase II promoter in response to increased salt	0.0707	5	1	CAGL0M13189g
32	GO:0061406	positive regulation of transcription from RNA polymerase II promoter in response to glucose starvation	0.0707	5	1	CAGL0M13189g
33	GO:0061412	positive regulation of transcription from RNA polymerase II promoter in response to amino acid starvation	0.0707	5	1	CAGL0M13189g
34	GO:0071281	cellular response to iron ion	0.0707	5	1	CAGL0F06413g
35	GO:0034599	cellular response to oxidative stress	0.0734	109	4	CAGL0G02739g/CAGL0G05335g/CAGL0M13189g/CAGL0J09812g
36	GO:0001676	long-chain fatty acid metabolic process	0.0842	6	1	CAGL0H09460g
37	GO:0006020	inositol metabolic process	0.0842	6	1	CAGL0I06050g
38	GO:0006067	ethanol metabolic process	0.0842	6	1	CAGL0D06688g
39	GO:0006595	polyamine metabolic process	0.0842	6	1	CAGL0F07777g
40	GO:0010619	adenylate cyclase-activating glucose-activated G protein-coupled receptor signaling pathway	0.0842	6	1	CAGL0G09020g
41	GO:0016036	cellular response to phosphate starvation	0.0842	6	1	CAGL0C02321g
42	GO:0036278	positive regulation of transcription from RNA polymerase II promoter in response to nitrogen starvation	0.0842	6	1	CAGL0M13189g
43	GO:0045471	response to ethanol	0.0842	6	1	CAGL0M13189g
44	GO:0071243	cellular response to arsenic-containing substance	0.0842	6	1	CAGL0M13189g
45	GO:0071468	cellular response to acidic pH	0.0842	6	1	CAGL0M13189g
46	GO:1900443	regulation of filamentous growth of a population of unicellular organisms in response to biotic stimulus	0.0869	34	2	CAGL0G09020g/CAGL0M03025g
47	GO:0006000	fructose metabolic process	0.0975	7	1	CAGL0C01397g
48	GO:0006085	acetyl-CoA biosynthetic process	0.0975	7	1	CAGL0L00649g
49	GO:0006113	fermentation	0.0975	7	1	CAGL0L00649g
50	GO:0032780	negative regulation of ATPase activity	0.0975	7	1	CAGL0J09262g
