# Supplementary figures and images for: Temporal transcriptional response of Candida glabrata during macrophage infection reveals a multifaceted transcriptional regulator CgXbp1 important for macrophage response and fluconazole resistance
Source: eLife journal article supplement (doi:10.7554/elife.73832), 2024-10-02

Figure 1-figure supplement 5

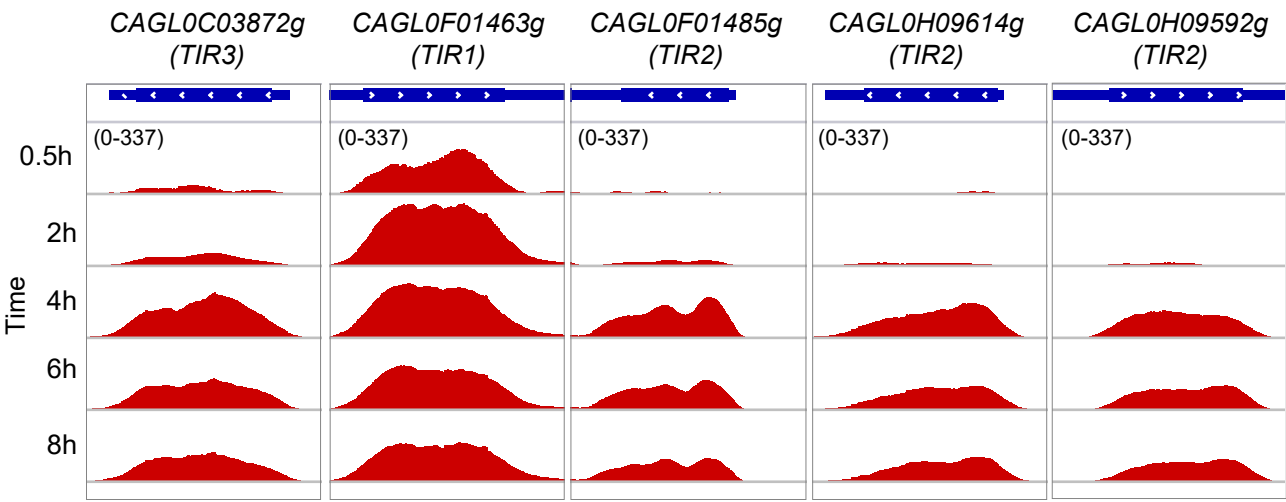

Supplement: supp [file elife-73832-supp-v1.zip]

# Figure 1-figure supplement 3

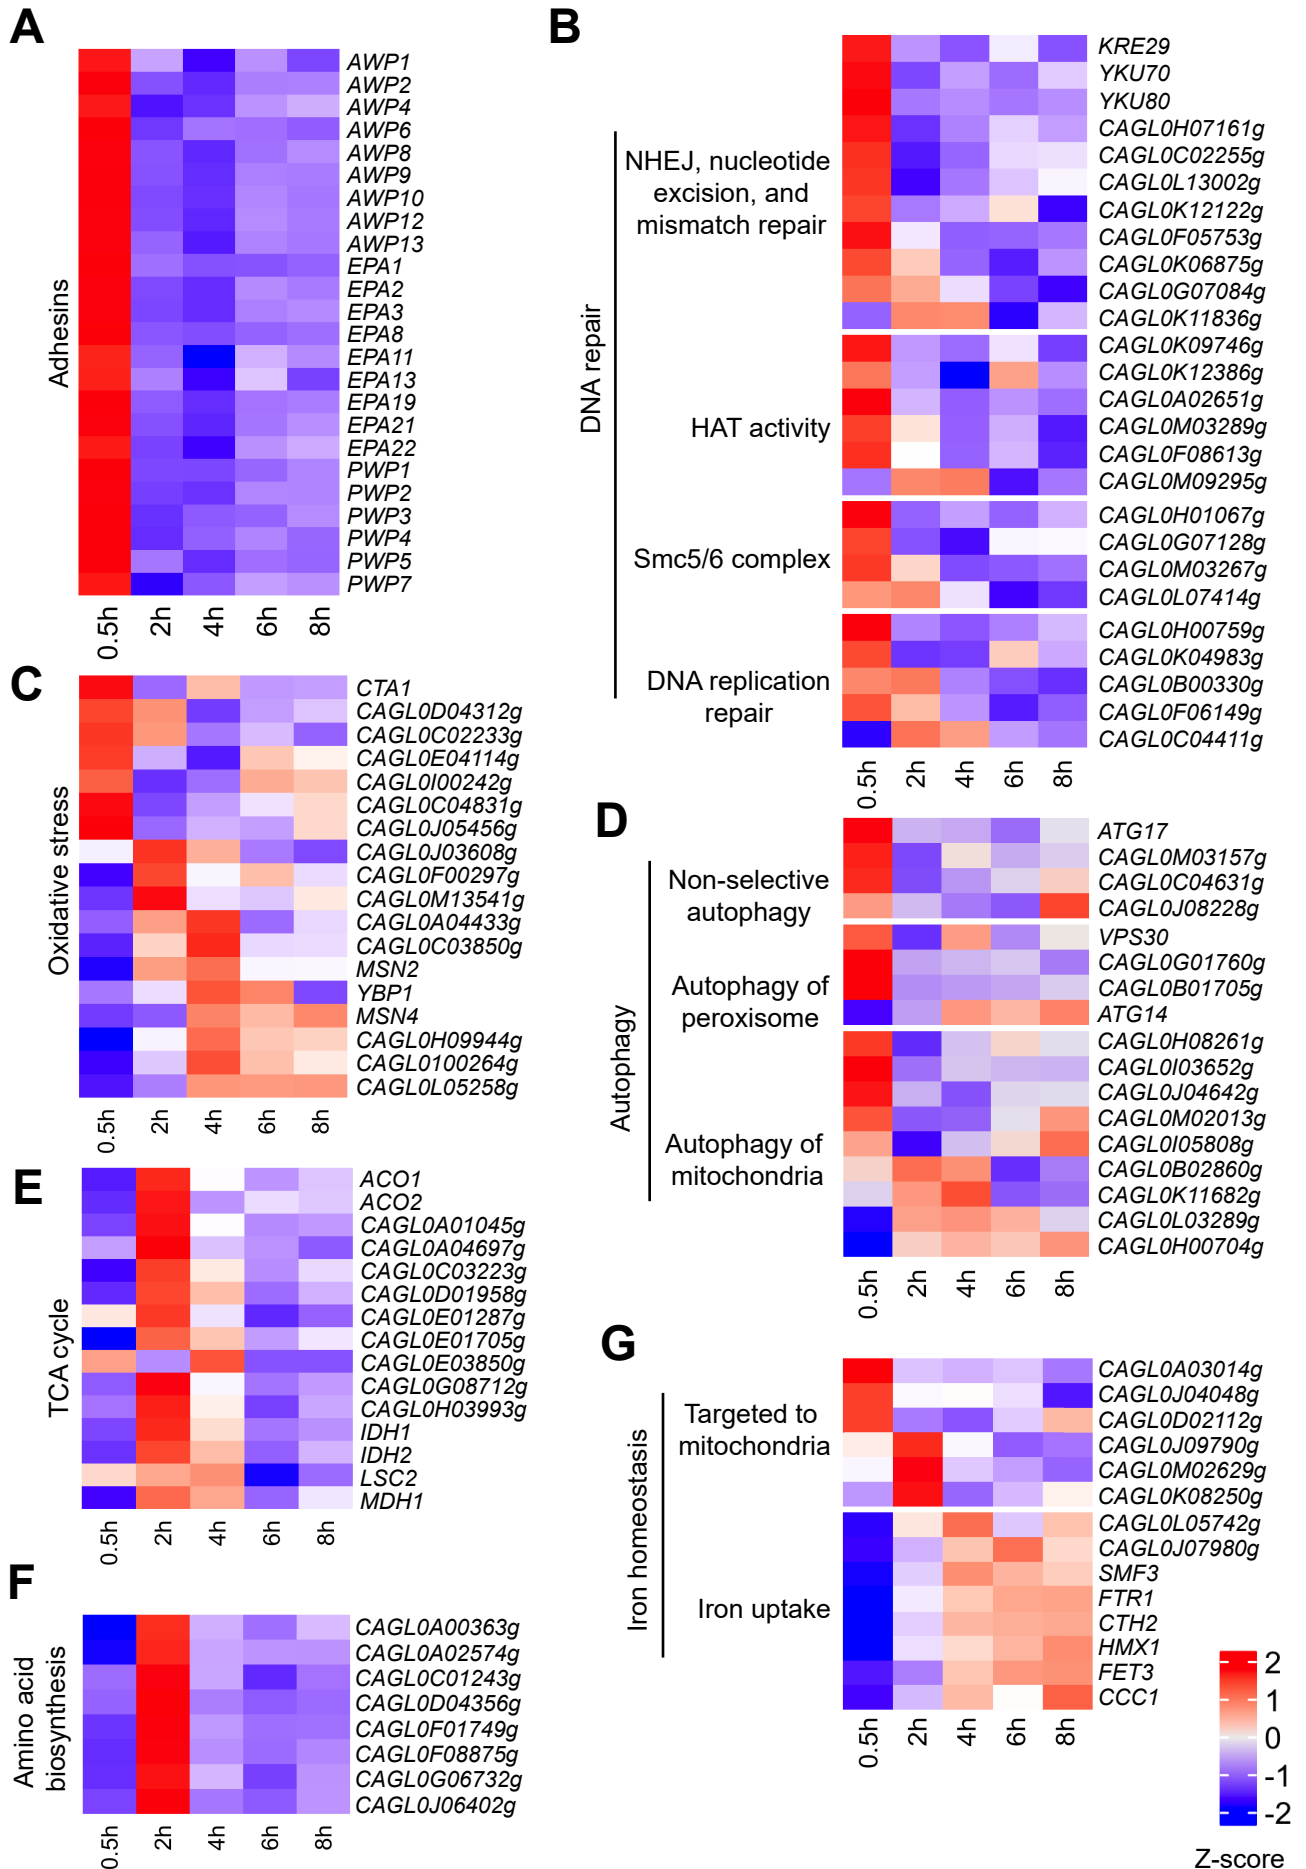

Supplement: supp [file elife-73832-supp-v1.zip]

# Figure 1-figure supplement 2

**A**

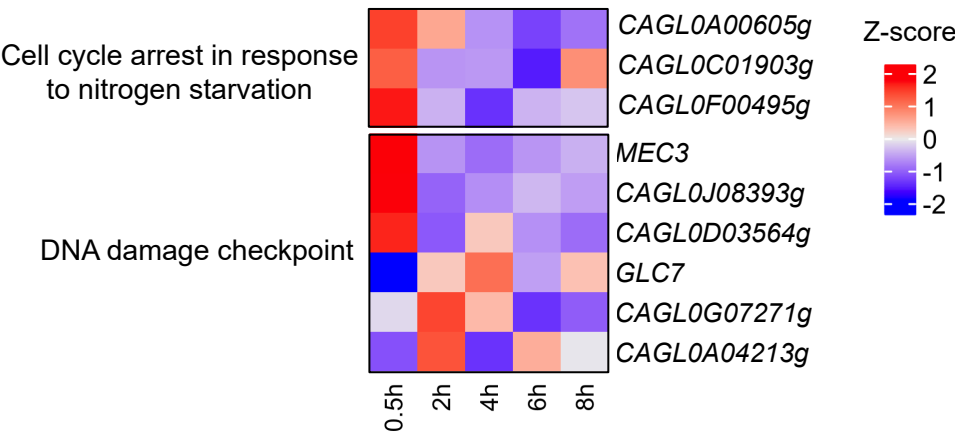

**B**

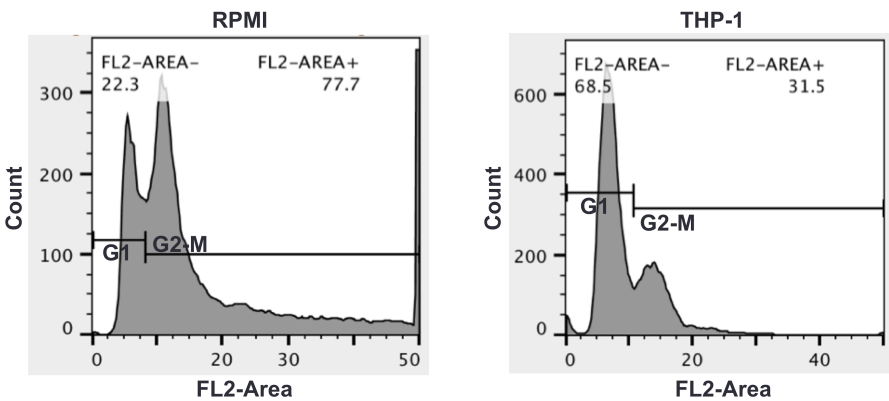

Supplement: supp [file elife-73832-supp-v1.zip]

# Figure 1-figure supplement 1

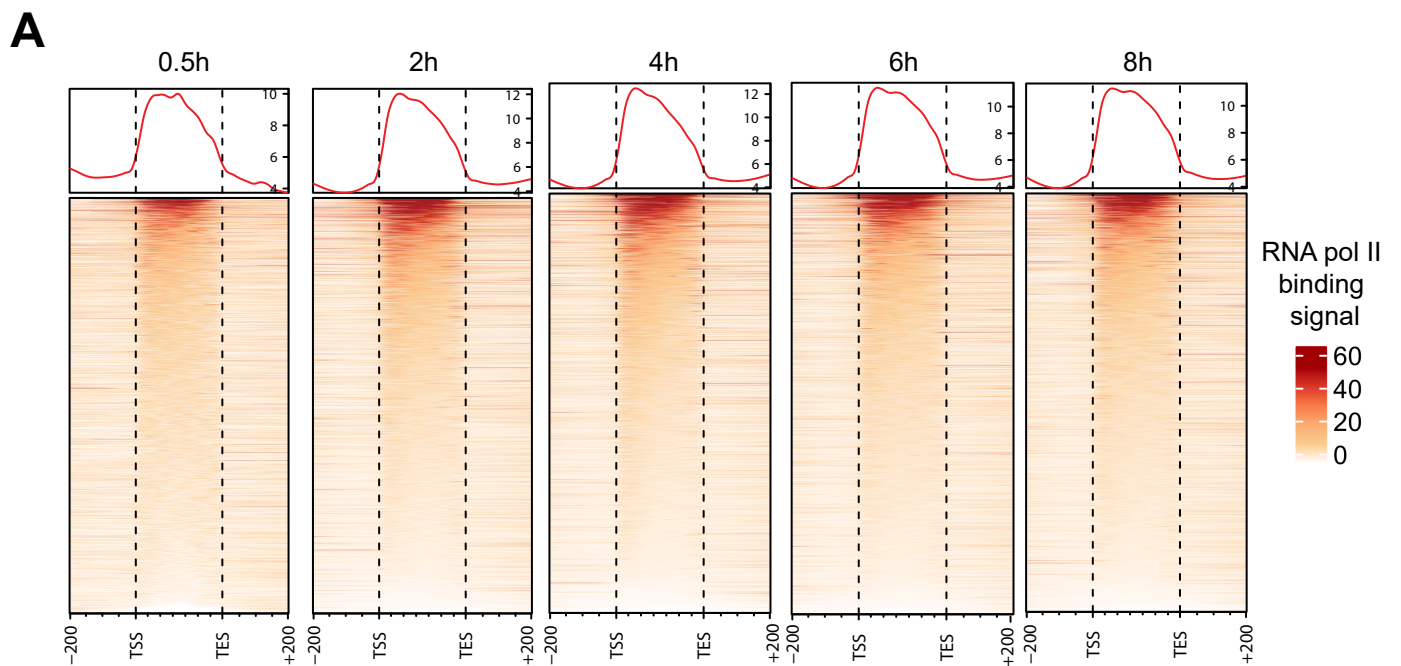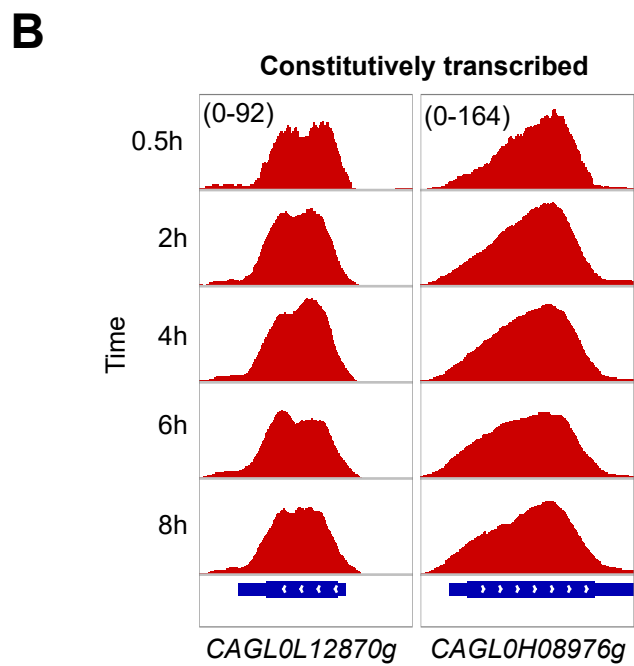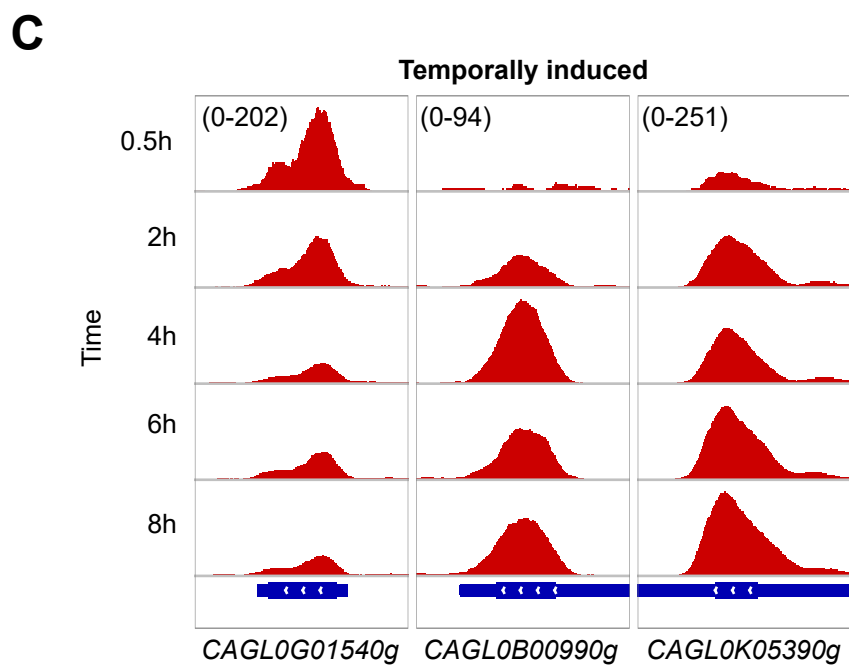

Supplement: supp [file elife-73832-supp-v1.zip]

# Figure 2-figure supplement 1

A

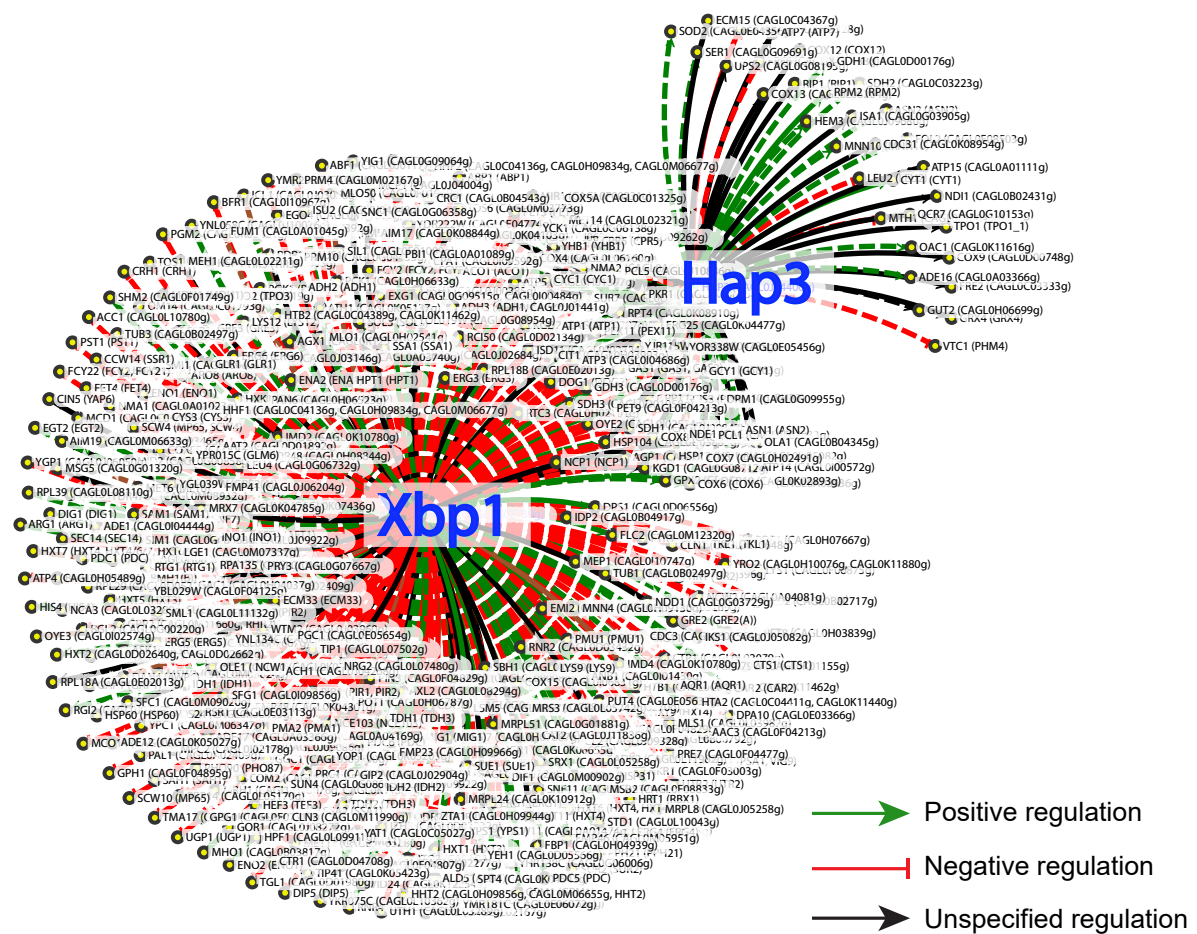

B

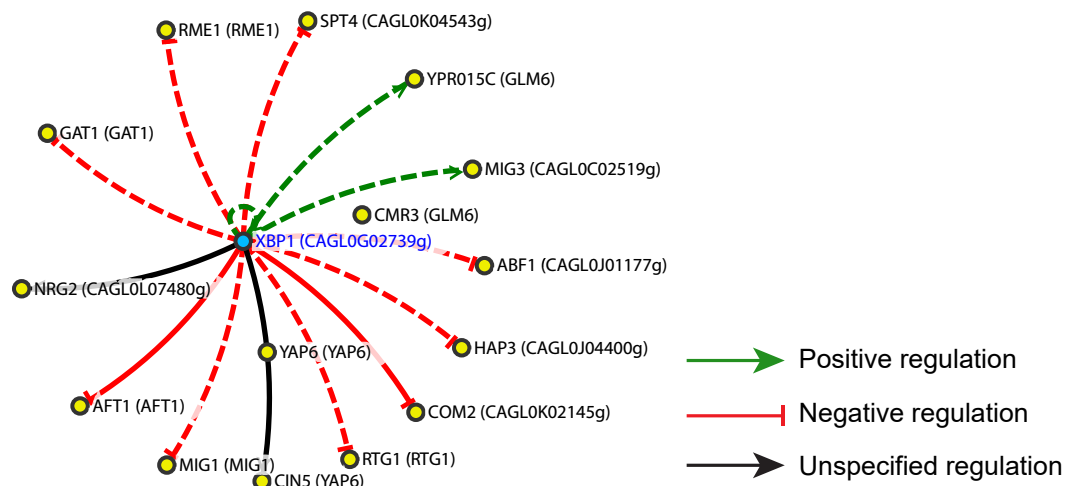

Supplement: supp [file elife-73832-supp-v1.zip]

**Figure 1-figure supplement 6**

**A**

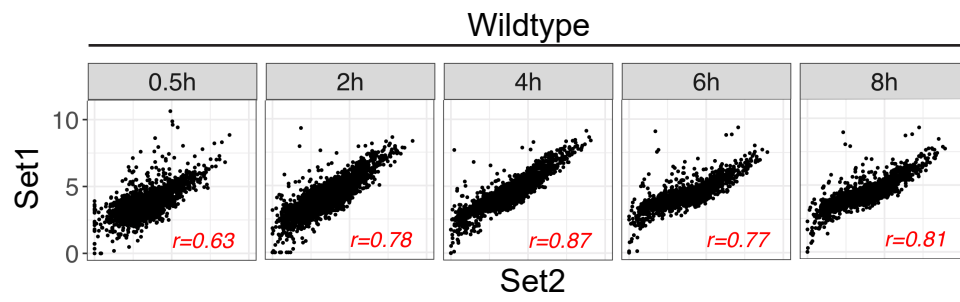

**B**

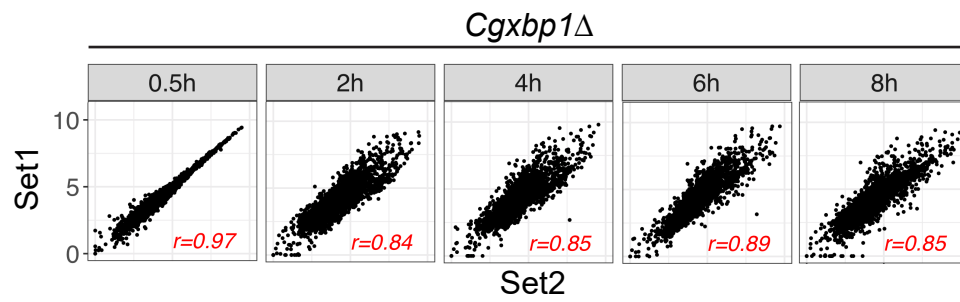

Supplement: supp [file elife-73832-supp-v1.zip]

**Figure 4-figure supplement 1**

**A**

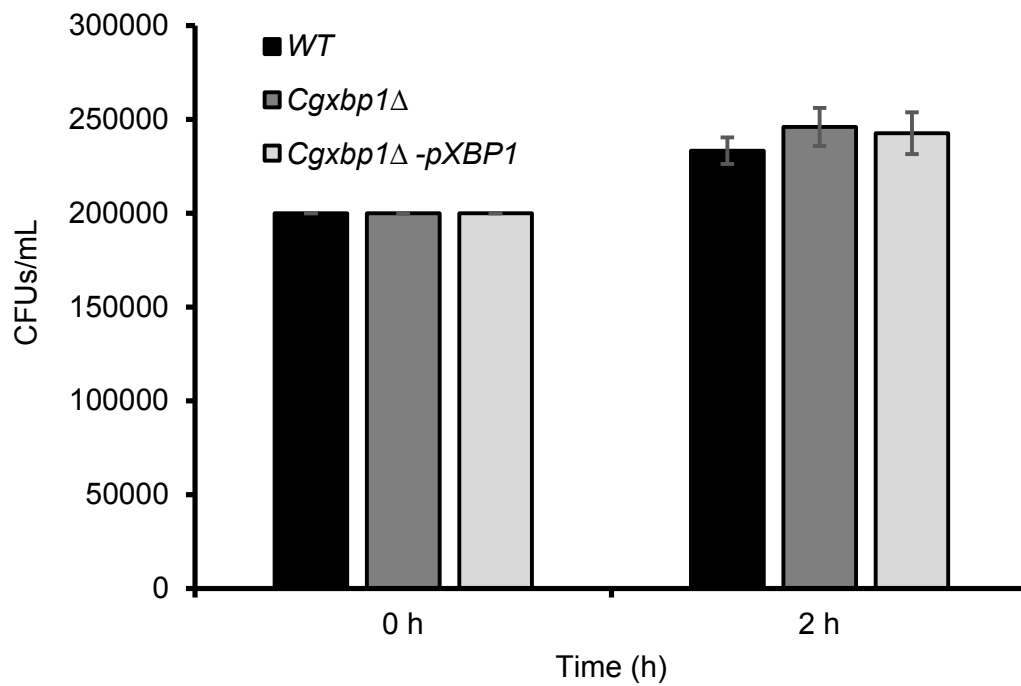

**B**

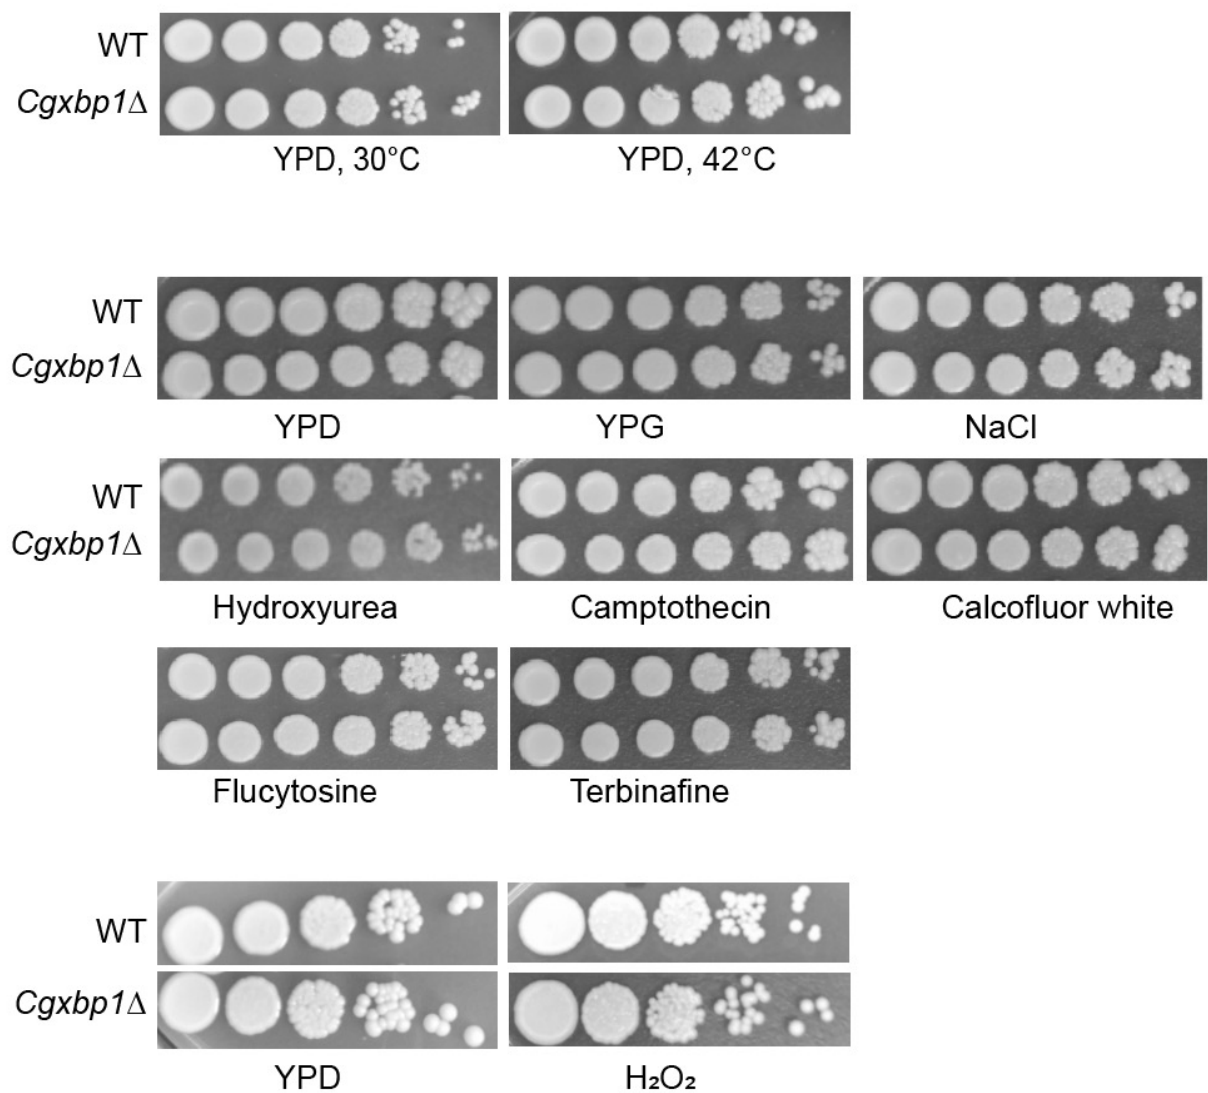

Supplement: supp [file elife-73832-supp-v1.zip]

Figure 1-figure supplement 4

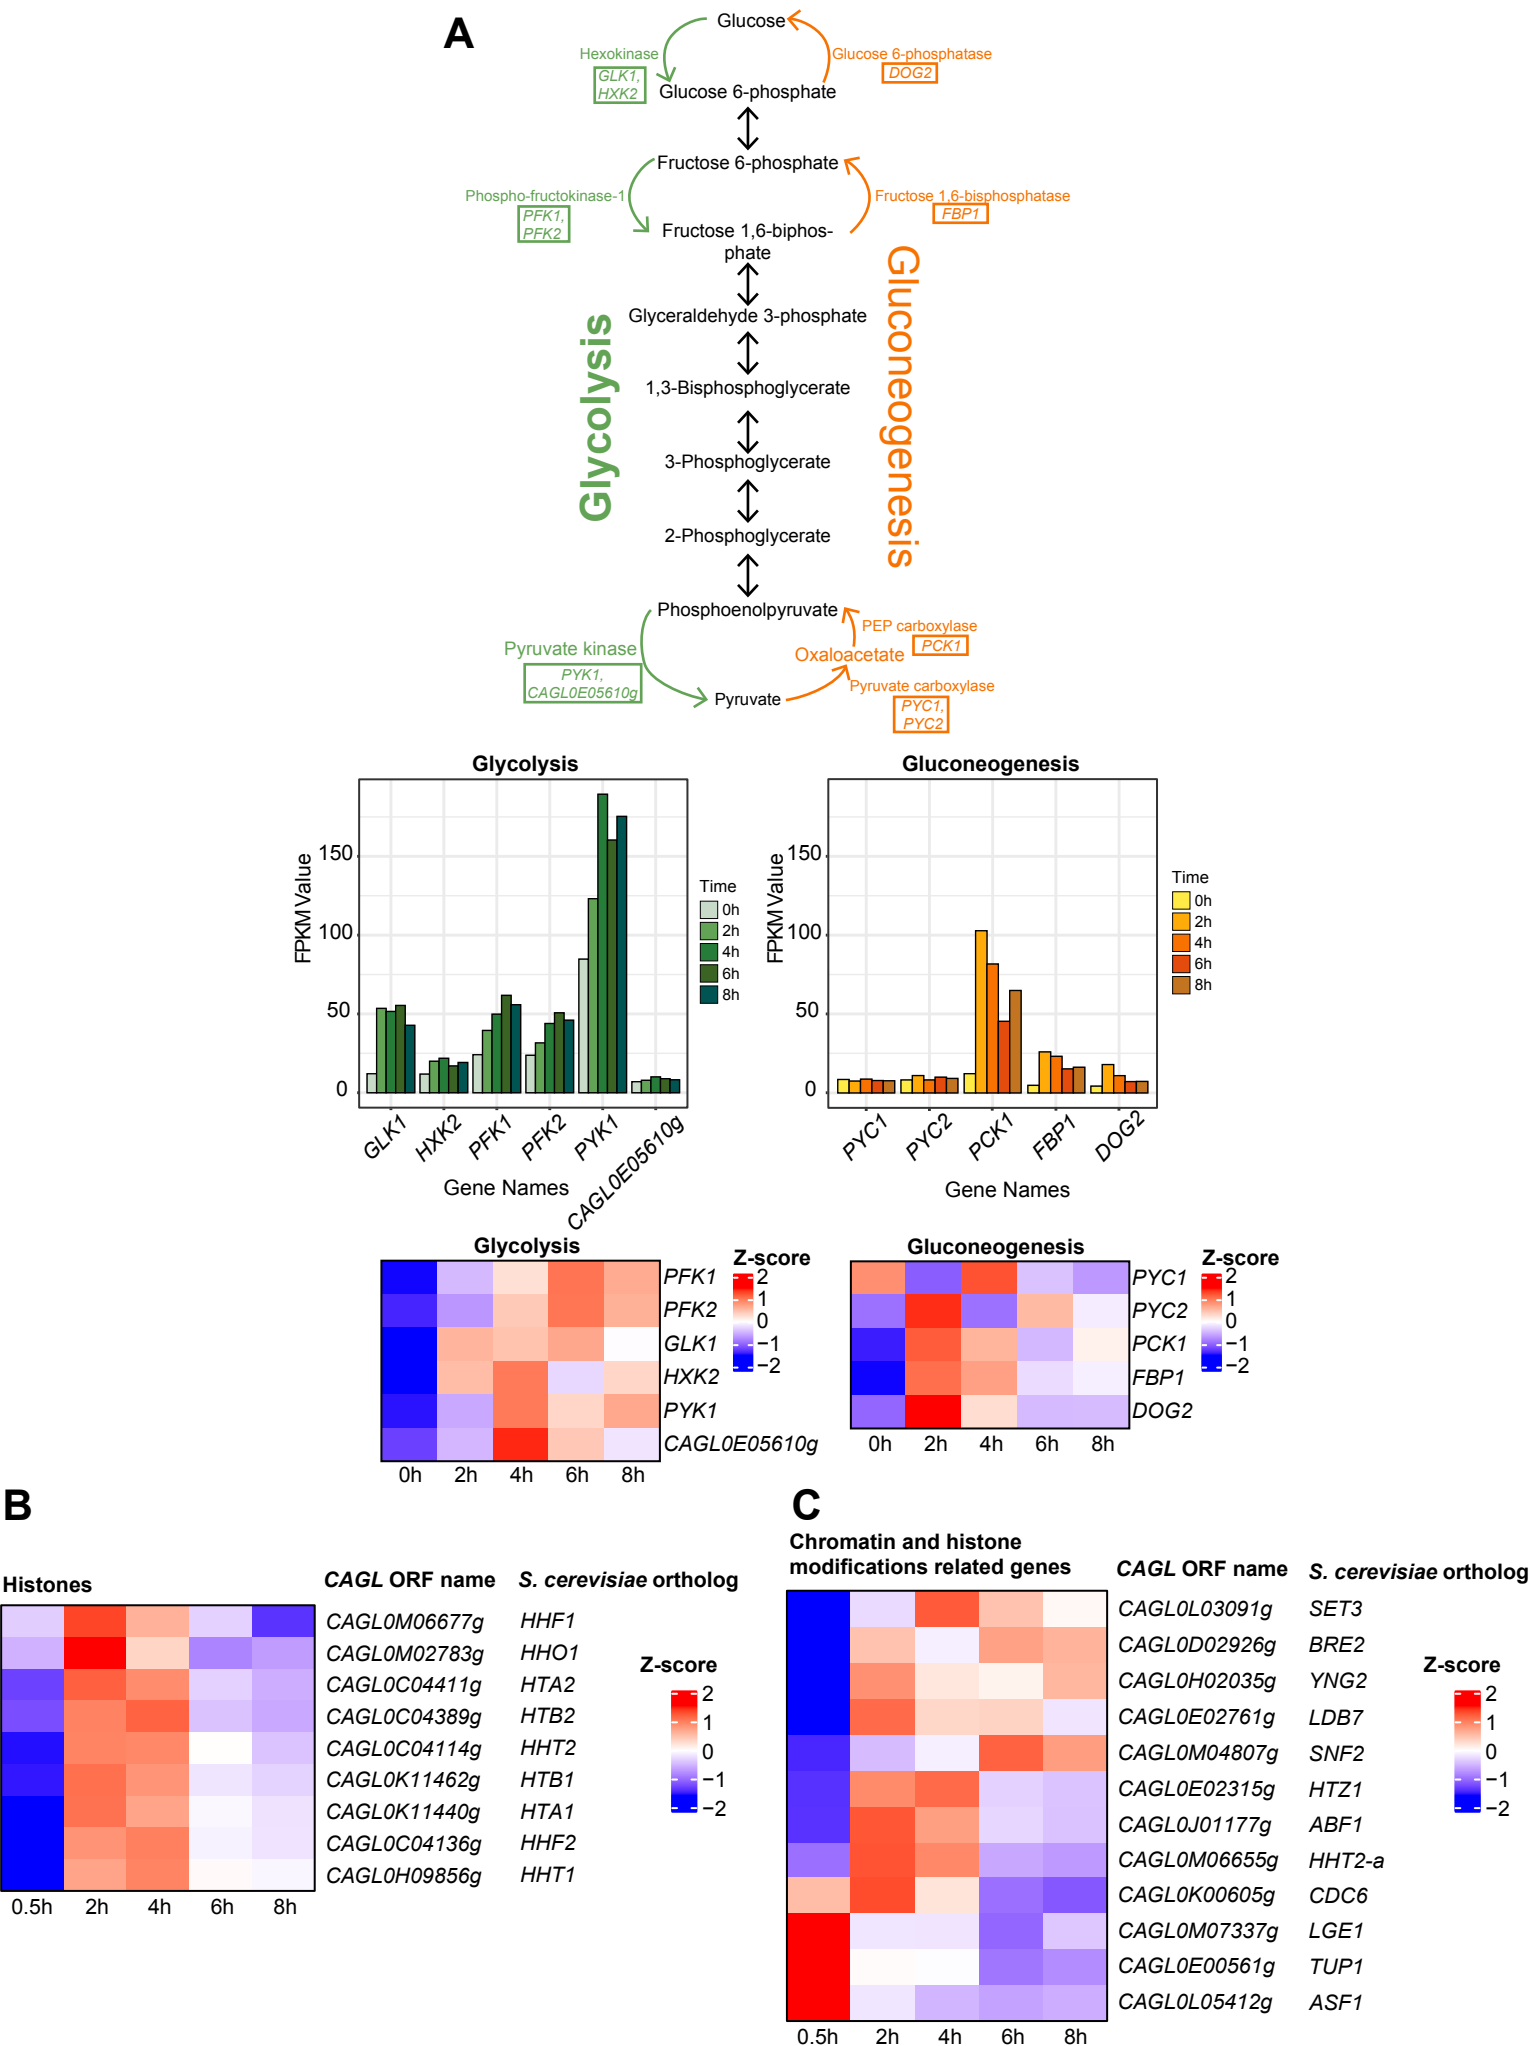

Supplement: supp [file elife-73832-supp-v1.zip]

# Figure 6-figure supplement 1

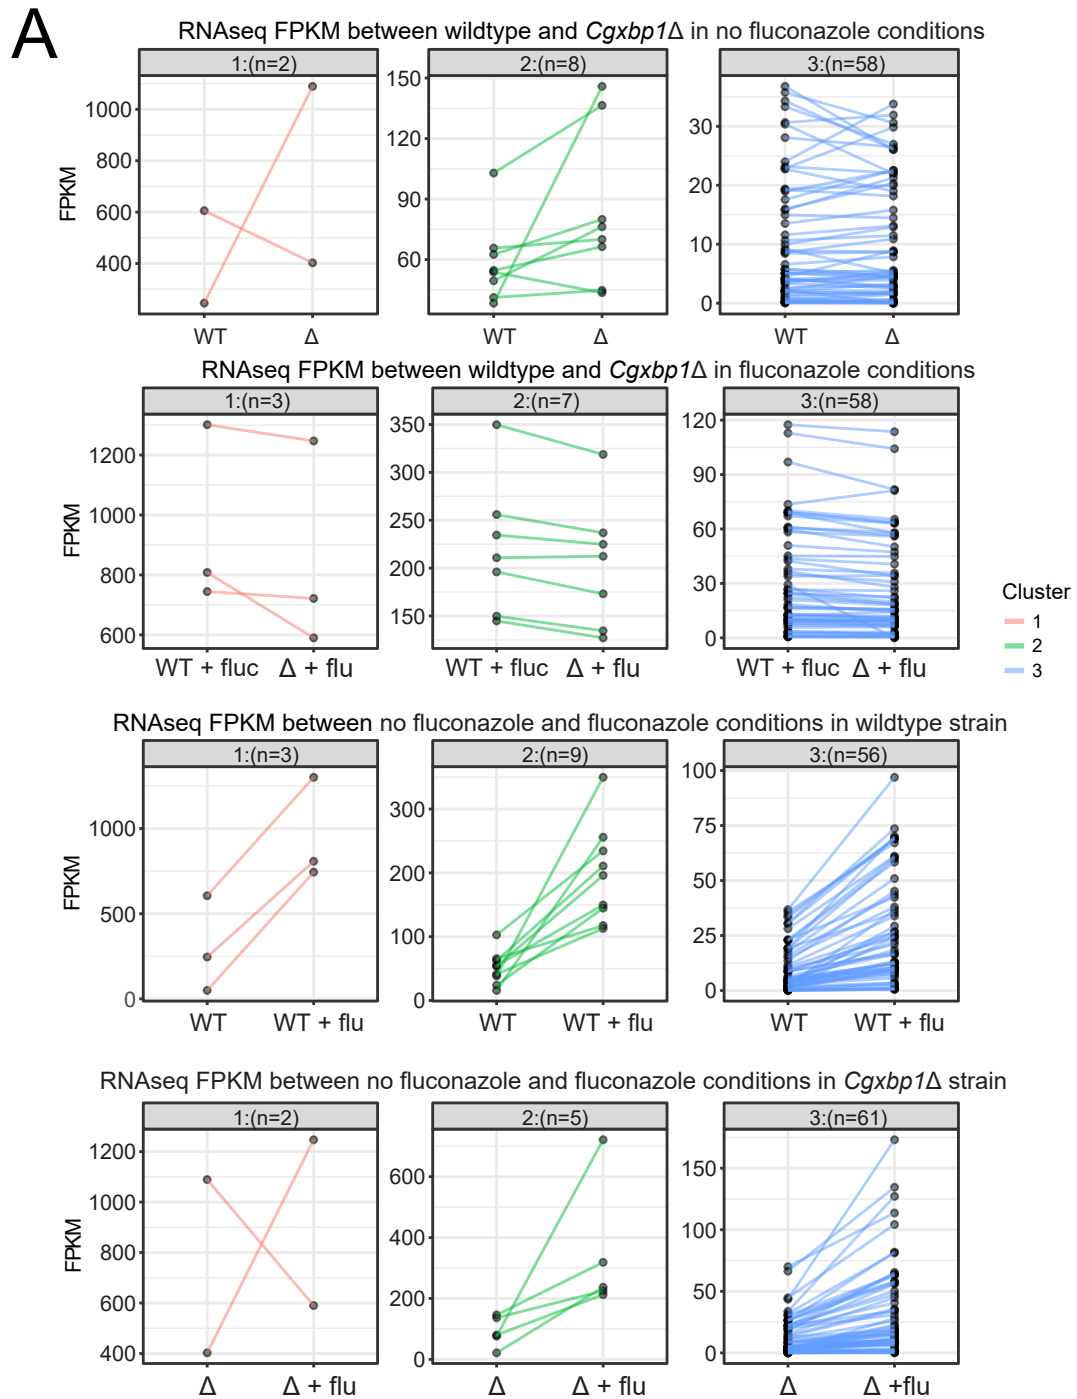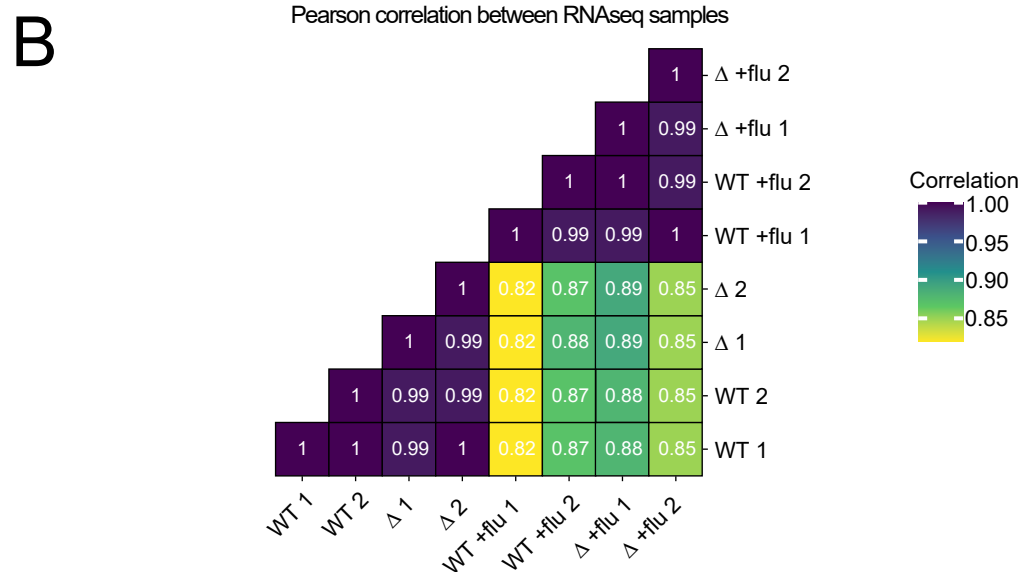

Supplement: supp [file elife-73832-supp-v1.zip]

Figure 6-figure supplement 2

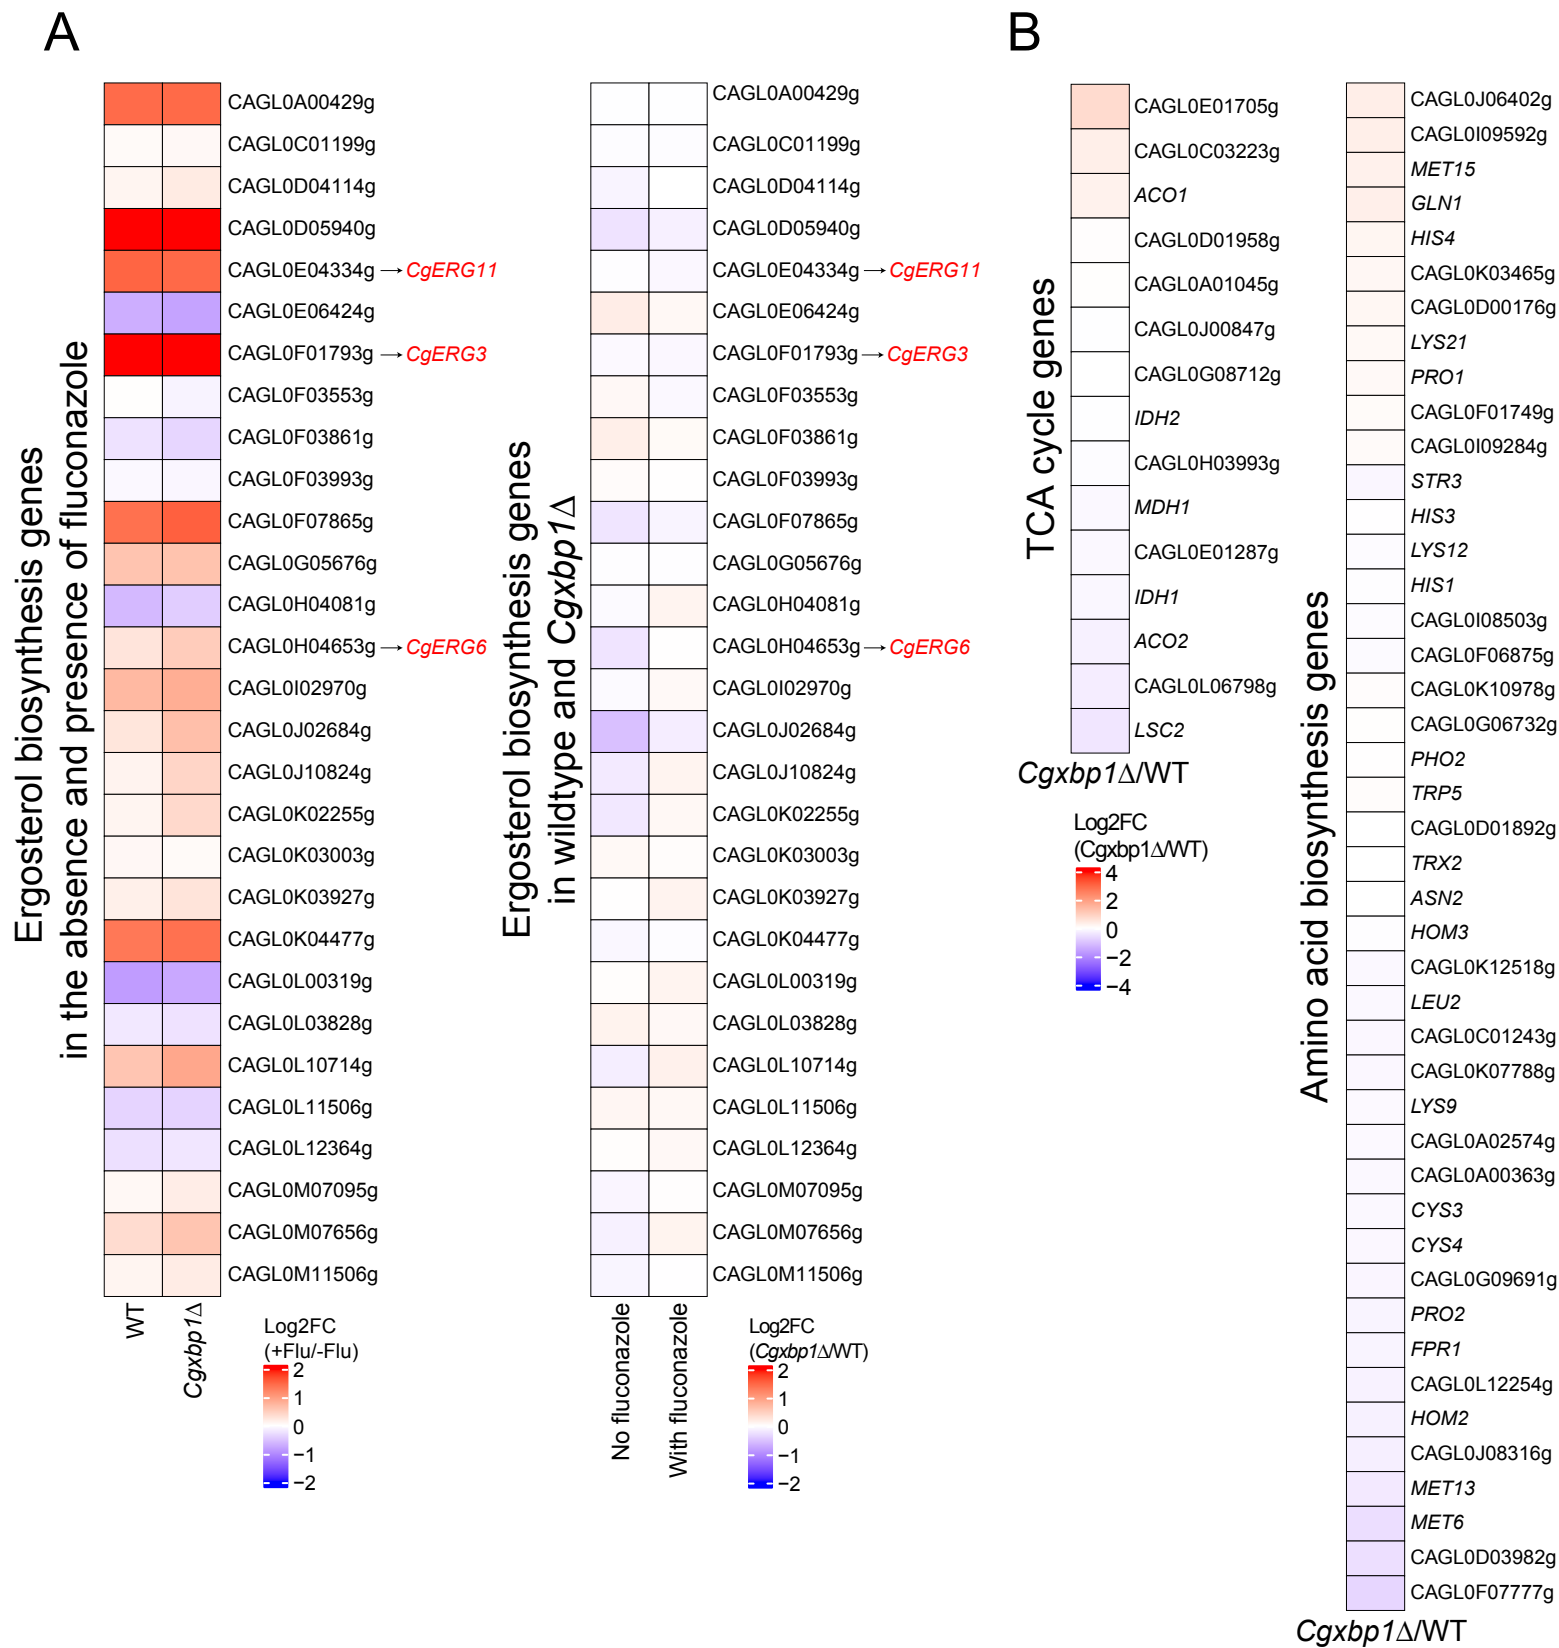

Supplement: supp [file elife-73832-supp-v1.zip]

# Figure 2-figure supplement 2

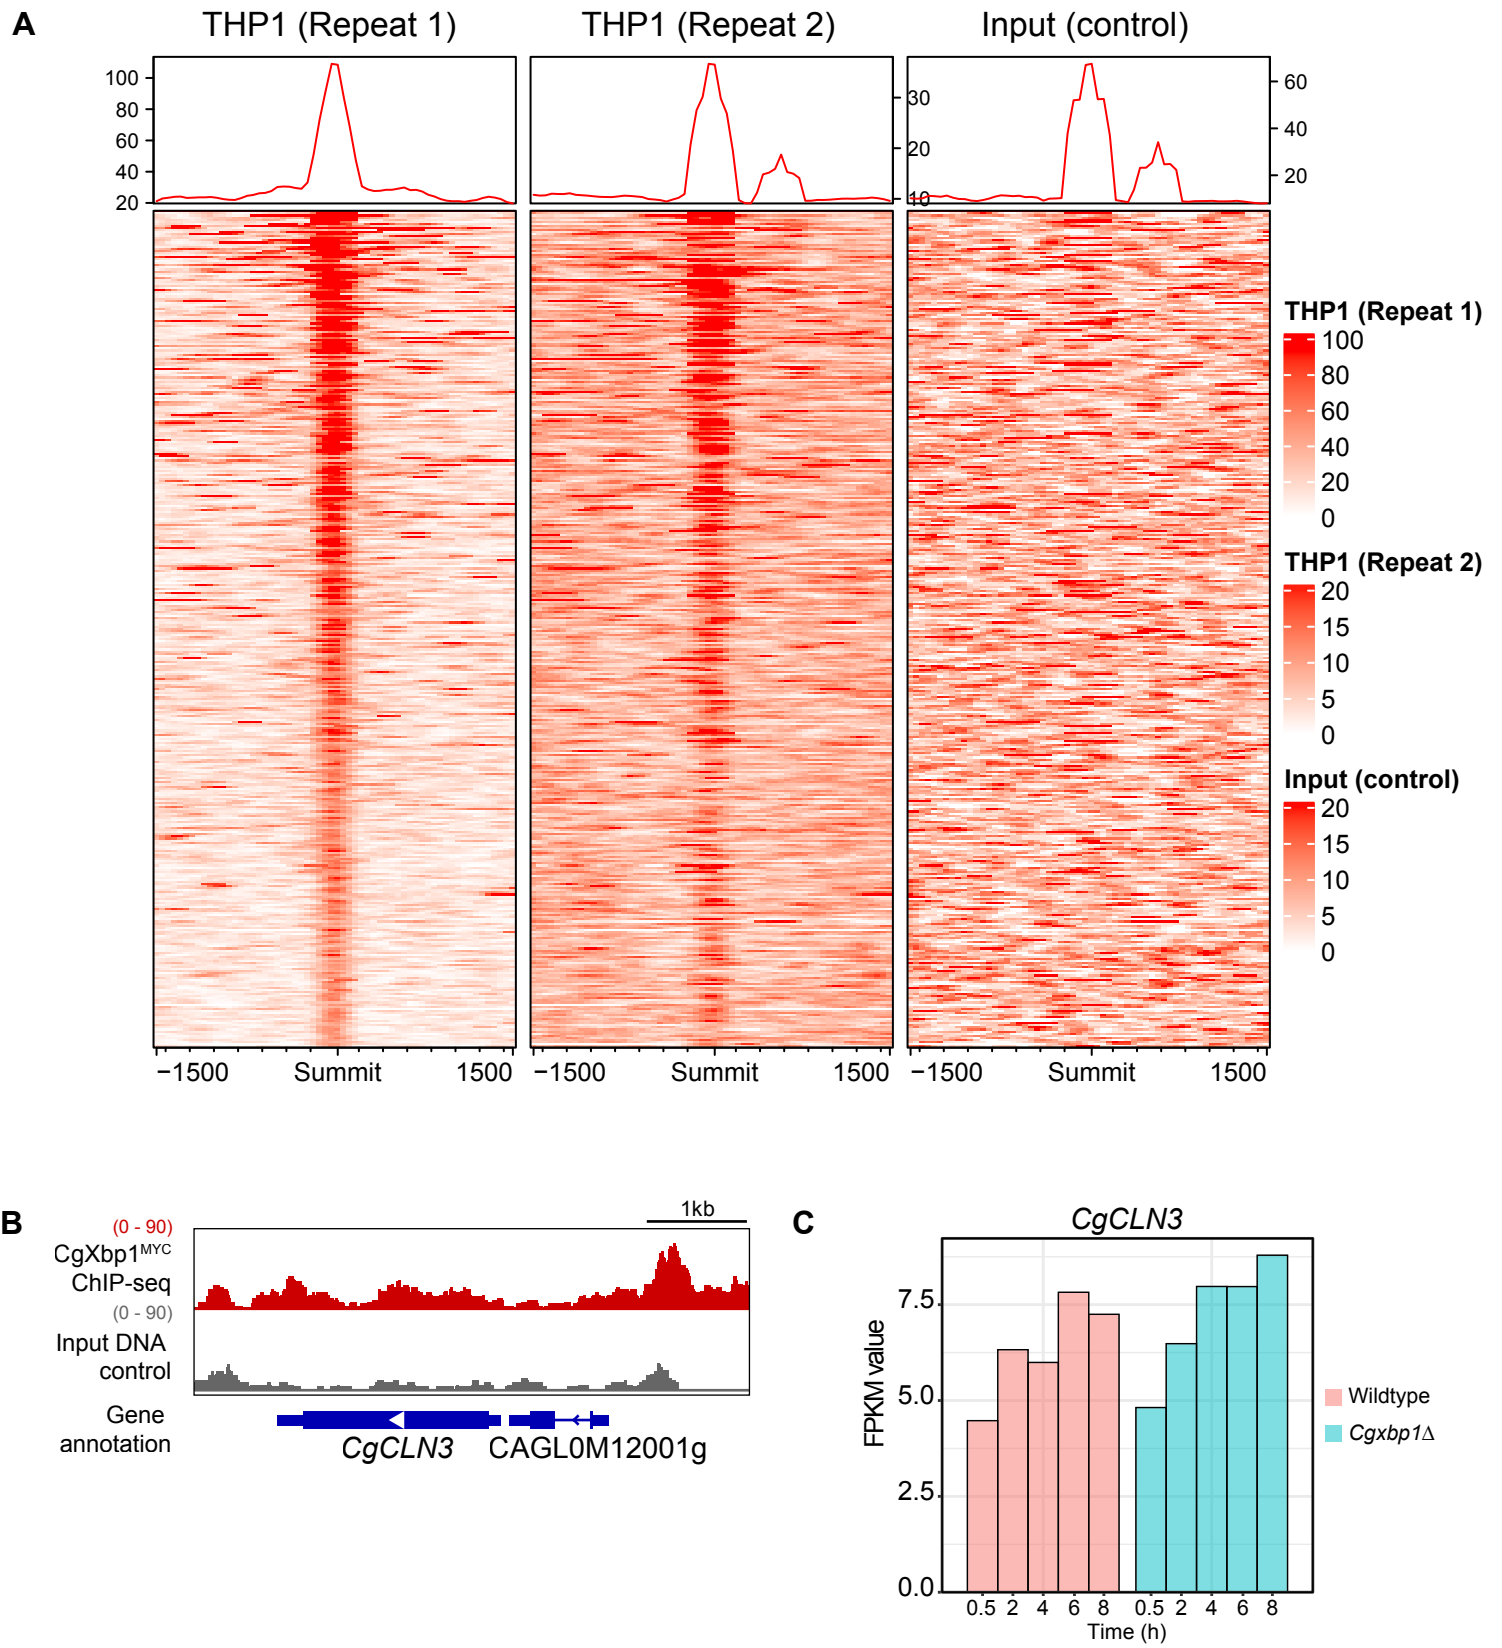

Supplement: supp [file elife-73832-supp-v1.zip]
